# Supplementary material for: Nutraceutical Profiles of Two Hydroponically Grown Sweet Basil Cultivars as Affected by the Composition of the Nutrient Solution and the Inoculation With Azospirillum brasilense
Source: Front Plant Sci. 2020 Nov 5;11:596000. doi: 10.3389/fpls.2020.596000 (PMC7674207; doi:10.3389/fpls.2020.596000)
Supplement: Supplementary Table 1 — Composition of the modified nutrient solutions. [file Table_1.DOCX]

**Supplementary Table 1. Composition of the modified nutrient solutions.**

|  | **NO3--fortified solution** | **SO42--fortified solution** |
| --- | --- | --- |
| **Macronutrient** | **Concentration (mM)** | **Concentration (mM)** |
| NO3- | 20 | 14.5 |
| NH4+ | 3.2 | 3.8 |
| PO43- | 3.4 | 3.1 |
| K+ | 11.2 | 11.6 |
| Mg2+ | 3.5 | 4.2 |
| Ca2+ | 4.9 | 5 |
| SO42- | 3.1 | 8 |
