# Supplementary material for: Nutraceutical Profiles of Two Hydroponically Grown Sweet Basil Cultivars as Affected by the Composition of the Nutrient Solution and the Inoculation With Azospirillum brasilense
Source: Front Plant Sci. 2020 Nov 5;11:596000. doi: 10.3389/fpls.2020.596000 (PMC7674207; doi:10.3389/fpls.2020.596000)
Supplement: Supplementary Table 2 — Whole dataset produced from untargeted metabolomic analysis carried out in leaves of sweet basil leaves of cv. Genovese in response to different treatments. Plants were grown in control hydroponic solution, in a NO3– or in a SO42– over-fertilized nutrient solution, either non-inoculated or inoculated with A. brasilense. [file Table_2.XLSX]

## Sheet: Dataset Genovese
Compound	Sample10_1	Sample11_1	Sample12_1	Sample19_1	Sample20_1	Sample21_1	Sample22_1	Sample23_1	Sample24_1	Sample7_1	Sample8_1	Sample9_1	Sample31_1	Sample32_1	Sample33_1	Sample34_1	Sample35_1	Sample36_1	Sample43_1	Sample44_1	Sample45_1	Sample46_1	Sample47_1	Sample48_1	Sample55_1	Sample56_1	Sample57_1	Sample57_2 - Copy	Sample58_1	Sample59_1	Sample67_1	Sample68_1	Sample69_1	Sample70_1	Sample71_1	Sample72_1	Alignment Value	Annotations	CAS Number	ChEBI ID	CompositeSpectrum	Retention Time
CPD-19721	1463038	548685	687518	348230	288277	384888	900157	396312	1	391562	599089	225979	630190	185327	269697	158232	1	963077	647112	471355	276194	701777	427057	1	265257	159706	525565	525565	166938	452451	1	1	391900	659446	1	1	CPD-19721	CPD-19721 [ C33 H30 Fe N4 O6, tgt=48.10, overall=48.10 ]			(637.2501, 1995.9836)(638.7615, 1731.6136)(639.1615, 4879.77)(640.1652, 768.14)(617.248, 1949.2)(618.35156, 506.59302)(621.1533, 785.45)(633.16846, 141.405)(618.86664, 7895.4424)(618.55304, 3107.1763)(619.65497, 515.6375)(650.19244, 5638.6245)(651.19763, 1883.4943)(654.1864, 544.48)(632.17114, 7666.044)(633.17444, 2935.9438)(643.1448, 429.47003)	17.5146
CPD-12328	1	4371234	1	5026407	1280725	1959079	1	1415345	4385285	1	1655470	1	6379869	9749978	5986185	1633310	3382342	2777650	6579968	10062798	5725844	1	1	12232532	8847164	8721223	5008586	5008586	3462193	4542312	3880520	9083486	17077216	1	9172160	1	CPD-12328	CPD-12328 [ C9H11NO, tgt= ]			(152.68335, 2342.1177)(134.0815, 3509.28)(152.87724, 16666.62)(132.08154, 97127.19)(133.08504, 10679.723)(134.08105, 4617.3022)(172.13345, 1878816.2)(151.55974, 13190.465)(151.11179, 8687.787)(173.03929, 8527.16)(174.0771, 11636.025)(177.0853, 127.51)(154.3968, 3768.6736)(159.08, 224.84)	17.5065
AMINO-HYDROXYMETHYL-METHYL-PYR-P	1	485937	359520	637709	390496	1	621974	434147	1	658730	916621	831201	208195	1962130	378240	380288	1	344155	261762	245260	345152	673837	1	435791	504051	644307	349194	349194	373630	643374	621027	964473	598127	359243	268522	453456	AMINO-HYDROXYMETHYL-METHYL-PYR-P	AMINO-HYDROXYMETHYL-METHYL-PYR-P [ C6 H8 N3 O4 P, tgt= ]			(219.0269, 309176.88)(220.03038, 20086.916)(199.01163, 138.102)(218.03384, 3429.071)(203.29247, 3291.8508)(235.17462, 7670.3286)(236.06004, 456.26715)(237.05453, 254.79999)(221.54355, 13274.465)(243.2007, 2915.4045)(244.02194, 904.71497)(245.0227, 5722.77)(225.93759, 1341.8728)(227.01694, 79.705)	1.70028
CPD-11826	49628760	39211352	1	41141272	17889804	49947488	23284706	15210086	44725216	44400556	18424956	47514424	52660604	40830448	20803558	44074728	22838612	45614120	38291604	43480288	40523184	50555220	35010504	27773580	38954660	37815760	54714252	54714252	28843884	25883176	33859048	29778988	40022676	32910504	43283840	20168236	CPD-11826	CPD-11826 [ C29 H49 O9 S, tgt=74.68, overall=74.68 ]			(576.4429, 8059.7666)(555.2997, 12809.3545)(556.31116, 3697.188)(557.29645, 425.22)(577.02893, 7628.3335)(580.3298, 3254.63)(558.8206, 7051.007)(560.33966, 6013.14)(561.1438, 6830.0054)(561.97955, 3793.8633)(562.3112, 1805.47)(593.37665, 1614.7574)(594.61005, 1552.6255)(595.4357, 1945.7001)(595.6877, 1717.57)(573.33124, 399368.94)(574.33264, 90395.59)(575.3343, 17079.932)(597.84503, 5481.0405)(60…	20.5128
CPD-19726	6402207	2112033	1662639	6383962	5857968	1768527	5601093	4533431	1	1358977	9054946	1097192	2469826	5321663	6095157	5454979	1561063	1691696	1782952	1807477	4250468	1	1	1	1	1110383	2819332	2819332	1	1047618	1	1	1	1	1	1	CPD-19726	CPD-19726 [ C15 H12 O7, tgt=98.52, overall=98.52 ]			(304.0541, 366.78)(305.066, 3120.7617)(306.0685, 179.34)(287.0556, 159105.45)(288.0586, 26570.0)(289.0614, 3576.4863)(322.09555, 14549.94)(323.1104, 3518.668)(308.84683, 3610.8655)	14.7706
CPD-11827	19705330	6723918	7429514	7394610	7774733	2059111	1443977	1903177	9675064	5867989	26218142	23005356	8288058	1676836	1729122	8305256	10092770	7454627	6111124	3325257	11485459	2800463	6549165	530766	7823741	555227	4114922	4114922	1756655	427321	15731152	11018757	1	970960	15628098	12268739	CPD-11827	CPD-11827 [ C29 H50 O5, tgt=71.07, overall=71.07 ]			(478.79156, 18417.086)(480.59827, 17432.635)(481.37085, 9749.487)(482.3736, 907.99)(483.3731, 18931.73)(463.82245, 12238.679)(464.5095, 8274.978)(465.7037, 4962.0767)(466.3719, 610.12)(479.6709, 8161.0576)(461.42557, 21000.6)(462.42694, 4450.8735)(464.37158, 3863.22)(498.25146, 1639.4407)(498.91052, 1471.455)(481.34097, 35792.164)(482.90497, 16189.502)(483.74216, 4285.98)(501.45172, 15974.991)(50…	29.1069
CPD-19725	1652977	2302084	1702015	984233	5928200	1801556	5681755	1041277	1	1441803	9025941	1200098	1	5315059	6079577	1108131	1456683	1685402	1880890	1771202	4363568	1	1	1	1	1177367	2872274	2872274	1	1	1	1	1	1	1	1	CPD-19725	CPD-19725 [ C15 H10 O6, tgt=99.21, overall=99.21 ]			(287.05557, 122976.7)(288.0586, 20484.955)(289.06146, 2663.047)(274.0612, 585.97876)(308.76303, 2672.9187)(290.33478, 2831.5764)	15.21
CPD-11828	77438856	25717858	35335040	23000192	3257856	29597210	33054696	22379238	27169890	22850328	20298262	31186004	34155120	9652034	27055148	5157932	8227438	30063396	6173160	11662812	9844333	17654704	7455259	10830862	15555048	13991291	13343211	13343211	17800744	11579996	11419872	8720102	7985076	7276914	6673847	13467500	CPD-11828	CPD-11828 [ C29 H49 O8 S, tgt=67.58, overall=67.58 ]			(559.73065, 254887.64)(559.60034, 118216.58)(560.3179, 40224.227)(561.8237, 3285.3115)(563.3265, 3309.46)(539.969, 177457.52)(541.4171, 72364.71)(542.30396, 27110.908)(543.5566, 4264.8276)(544.3082, 2326.58)(545.3161, 253.01)(561.573, 13356.32)(564.3327, 12373.72)(541.6558, 38153.95)(542.4313, 15935.121)(543.5871, 18266.305)(545.3923, 11728.896)(546.1227, 11547.857)(575.7305, 4774.8906)(577.35693…	21.8146
CPDQT-326	10035700	11105356	15477485	4214100	3318688	3522246	39704748	61448572	35257232	7923227	8618851	7134692	22444924	8919559	34599364	7077801	32929552	21451340	11727251	1	6006001	2912428	1798751	6396748	2159206	5253590	17684328	17684328	3343393	1309895	5593811	5494406	43506612	3882734	1	29887398	CPDQT-326	CPDQT-326 [ C29 H50 O6, tgt=78.56, overall=78.56 ]			(496.3653, 16877.898)(499.87735, 10185.683)(499.97623, 5190.772)(499.3772, 20191.29)(476.6712, 23075.156)(481.3689, 7962.92)(497.75348, 25878.102)(499.1605, 12360.394)(500.23526, 7143.4033)(500.719, 8512.837)(477.4459, 59386.87)(478.4489, 18588.61)(480.11478, 4941.9624)(513.6563, 12926.46)(514.4003, 6956.6704)(515.4064, 2023.3987)(516.40735, 1266.8225)(494.4506, 4072.2346)(495.59604, 815.30994)(5…	27.8864
INDOL-YLACETYL-MYO-INOSITOL-ARABINOSIDE	2412009	1	2672855	4861735	5271190	601217	6699393	4232119	2045938	1735807	5002563	1098452	7290039	5652499	3784423	4883598	5059578	3321505	6183524	6283660	9080303	6376288	6320348	1538538	7096529	6769296	8516477	8516477	4019474	1134753	1	1567447	1614132	8046637	8662122	1009234	INDOL-YLACETYL-MYO-INOSITOL-ARABINOSIDE	INDOL-YLACETYL-MYO-INOSITOL-ARABINOSIDE [ C21 H27 N O11, tgt=70.96, overall=70.96 ]			(471.3468, 49023.977)(471.83307, 10592.386)(473.1687, 2815.9023)(474.16864, 1249.6476)(452.11502, 2902.9443)(455.1994, 5912.4253)(456.16104, 1615.2374)(457.16708, 492.7767)(471.9834, 58210.25)(471.72482, 12387.755)(472.16406, 1780.4286)(473.1671, 140.06)(453.49234, 35033.113)(454.93994, 11006.785)(458.17142, 2439.54)(487.90457, 59703.8)(489.1976, 21275.64)(490.19675, 7244.329)(491.2, 1899.9373)(4…	12.122
CPD-7420	218574880	13373206	286160928	7914062	25667250	32107788	10641811	12620225	45397640	15062807	83609800	13588769	15198885	13209970	12880895	10698421	297785504	17420876	31292984	292941472	39175828	64331712	113865560	139063232	177098480	195746160	1	1	170097792	149293584	565855170	23946576	326530240	266992992	5595292	2205073	CPD-7420	CPD-7420 [ C40 H58 O, tgt=70.54, overall=70.54 ]			(556.60144, 9696.675)(558.3346, 5245.822)(559.9728, 14365.165)(560.4737, 10277.73)(539.1456, 15304.13)(540.5801, 10835.991)(541.45105, 3421.7942)(542.4544, 96.02)(559.21954, 10544.558)(560.47394, 4991.809)(540.7557, 15557.761)(541.79083, 6719.9136)(542.4618, 2791.68)(573.2498, 584360.9)(574.4913, 285567.97)(577.5047, 9723.79)(576.503, 4055.43)(577.5048, 103.81)(556.22437, 615.82)(580.6144, 15014.…	27.4584
CPD-13471	3895479	11186322	9306649	24743576	13648462	4805069	4307182	19807088	2394706	17779008	3628699	44312840	1	1	1	20629800	3402311	4462665	2157382	1	4199592	2867061	1	1914791	3641227	3481107	5247312	5247312	3366612	2767843	3981526	2236919	2904300	1565595	4813341	2881481	CPD-13471	CPD-13471 [ C16 H32 O6, tgt=50.28, overall=50.28 ]			(323.854, 1901.665)(324.22974, 344.18)(305.71606, 1612983.2)(307.22055, 781491.56)(323.23468, 3126.9312)(306.82828, 15839.9795)(308.2334, 4334.44)(340.4074, 11374.6455)(341.4153, 3066.6377)(322.2474, 19351.143)(323.44955, 5136.5884)(345.7894, 37308.13)(347.21674, 20708.977)(327.0872, 17883.295)(328.04074, 27066.576)(330.216, 83613.34)	16.7468
L-GAMMA-GLUTAMYLCYSTEINE	1	3212876	2466684	3472142	2604570	2568799	3893512	1	3796413	5091495	4267257	2426368	2312896	1	1	1	1	2997837	3533260	3872912	4577853	4260970	4213714	3182578	3076697	4043534	4479265	4479265	2188255	1	3283537	1	3007529	3938489	4518738	1	L-GAMMA-GLUTAMYLCYSTEINE	L-GAMMA-GLUTAMYLCYSTEINE [ C8H13N2O5S, tgt= ]			(251.05466, 298.32)(233.0435, 3911.195)(234.0467, 204.09)(250.06496, 3586.1904)(251.06725, 192.76143)(232.09093, 7542.4746)(233.05501, 1121.0637)(234.047, 211.17)(267.40228, 4641.9355)(268.29388, 808.53796)(249.77832, 5172.5)(250.0691, 922.65)(272.0424, 2303.4294)(273.04062, 130.60333)	13.9753
CPD-7424	1	466643520	1	99652416	130613216	340226176	1	335815616	383087648	1	1	1	1	335156864	380168576	1	358486144	1	404849024	322575744	708341820	796271550	766677310	730994940	1	646236740	685276160	685276160	785229700	757045380	713627900	1	1	1	1	1	CPD-7424	CPD-7424 [ C40H56O4, tgt= ]			(600.41504, 164121.84)(582.40295, 25524.152)(601.4253, 1002557.44)(602.4288, 428002.94)(603.4319, 96134.29)(604.43506, 17355.016)(605.4278, 2845.551)(583.4149, 1579380.0)(584.4183, 685072.56)(585.4235, 178261.88)(586.42896, 40237.38)(587.4286, 3868.5256)(620.74524, 5192.759)(621.9708, 7271.23)(622.4659, 5318.64)(602.9492, 10921.605)(624.079, 25869.955)(625.4186, 24582.514)(627.0063, 69211.586)(62…	26.5966
GDP	1	1	1	226105	1	1	1	1	1	1	98594	1	1	341429	1	1	1	1	1	1	1	1	1	1	1	1	1	1	1	1	1	1	1	1	1	1	GDP	GDP [ C10 H12 N5 O11 P2, tgt= ]			(425.0008, 1081.46)(425.0015, 907.14)(427.0071, 696.34)(441.0255, 2969.1802)(442.52417, 476.55)(443.0256, 345.13)(445.0316, 3488.43)(463.4886, 636.985)(444.97412, 6498.665)(445.9762, 2158.73)	1.404
CPD-6963	2231241	3427757	1977977	1000687	1517915	2984968	2403674	1726072	1457115	1647685	1238328	2869330	2074596	3002870	2056537	1331486	1882876	2397572	1503948	1435496	4147721	4846891	1865123	2276565	2487443	3903972	1510551	1510551	1	2583899	1446353	3032070	4880291	2876770	2042158	1	CPD-6963	CPD-6963 [ C14 H14 O2, tgt=80.11, overall=80.11 ]			(217.57857, 12973.436)(219.11353, 10027.384)(200.72043, 246380.4)(201.10432, 306198.56)(215.44244, 79318.625)(216.1102, 14105.457)(197.19296, 21133.264)(198.0943, 2269.174)(232.1356, 66593.79)(233.1338, 3835.0999)(234.1243, 6593.81)(214.12462, 52987.97)(240.34668, 18368.354)(220.61188, 11890.197)(223.67082, 1708.6246)	17.8693
ACENAPHTHENEQUINONE	1874121	4671760	964271	2667256	345723	167751	2915989	192039	1	1699638	410055	2235784	139543	2357276	784843	1	1027319	2418342	251745	249543	123191	1277947	166847	1851943	2490531	1887078	3300127	3300127	120626	1	1455508	2426342	4285884	503937	3095646	1752439	ACENAPHTHENEQUINONE	ACENAPHTHENEQUINONE [ C12 H6 O2, tgt=62.66, overall=62.66 ]			(185.04526, 5917.0503)(166.0341, 52.25)(187.65617, 11942.072)(188.0578, 21111.28)(169.39801, 14168.058)(170.0468, 46590.69)(201.87393, 5999.681)(205.08537, 4648.1167)(185.00589, 91709.52)(186.03416, 20225.223)(187.07545, 14536.49)(209.67445, 2516.8093)(210.0386, 3175.545)	5.45617
CPD-19719	18232462	57892632	35765824	64257600	27131872	27576298	75200752	45388956	40430304	42573008	60366072	1	7552480	63984176	40873356	74406784	14615002	46546196	12476493	11615731	11015313	8493146	13864244	34274312	44772716	43480068	9954948	9954948	7861421	4631514	6299650	92319008	17895750	7208195	6491083	14594759	CPD-19719	CPD-19719 [ C33 H29 Fe N4 O5, tgt=62.68, overall=62.68 ]			(616.17737, 2148371.0)(617.17993, 855711.06)(618.18256, 186544.25)(619.1849, 28608.287)(620.18726, 4014.3047)	23.8896
CPD-12332	24729020	18307868	14557834	49196420	22687620	16226993	26053866	23965022	17400104	56401220	36737664	9088649	15164993	24852552	27557162	60140168	87247536	10226426	14565679	8706419	17748988	9882305	18718208	17604750	1	16805932	5622079	5622079	1	64416168	5496663	8616003	17930328	13576097	15959747	5116540	CPD-12332	CPD-12332 [ C20 H26 O5, tgt=59.48, overall=59.48 ]			(346.3332, 1726.7147)(347.18765, 48.989998)(328.16388, 633252.0)(329.1669, 141980.08)(330.16907, 10728.719)(351.42117, 14899.804)(352.204, 44.96)(330.11057, 122580.29)(331.18195, 23341.674)(332.18192, 4617.828)(333.18524, 710.7521)(334.1925, 483.74)(366.69556, 12066.263)(368.05753, 5094.275)(368.72665, 16417.06)(369.2301, 26378.37)(347.96863, 40202.156)(348.83377, 14421.898)(351.04898, 6304.2817)…	15.0086
CPD-13475	5054503	8148908	5552203	2466848	5195191	2276886	4327380	3192591	6526761	7680446	4502833	3612855	8044289	2136953	4059673	3592792	3343583	3232966	3827209	4297223	5244071	6742087	5567680	6040744	7715362	6489556	5144790	5144790	4723536	4989211	2845016	2784263	6934768	7068156	11680768	3848735	CPD-13475	CPD-13475 [ C15 H24, tgt=99.59, overall=99.59 ]			(205.1953, 222601.1)(206.19841, 39264.14)(207.20212, 2387.3286)(222.22179, 1756.0905)(223.22415, 204.52)(227.1756, 16682.682)	26.6223
CPD-12333	1	1	14557834	49196420	1	16226993	26053866	23965022	1	56401220	36737664	1	1	1	27557162	1	87247536	1	1	1	1	1	1	1	1	1	1	1	1	1	1	8616003	17930328	13576097	15959747	1	CPD-12333	CPD-12333 [ C20H26O5, tgt= ]			(346.17905, 1540.405)(328.16412, 767091.75)(329.16635, 188923.05)(330.16907, 12871.874)(351.70264, 2065.915)(330.17783, 144137.88)(331.18274, 23572.533)(332.18185, 4901.215)(333.1848, 417.18002)(334.1912, 384.66)(367.7954, 12771.365)(367.55734, 3625.55)(368.2231, 3196.38)(369.2301, 26378.37)(348.65445, 47352.39)(349.61465, 14563.38)(351.21646, 5426.4727)(369.17206, 6415.518)(352.15897, 9098.508)(…	19.41
17-O-DEACETYLVINDOLINE	8253042	6113289	6128765	6949685	8913806	27580508	8635978	5196939	14329686	7542283	26483446	6480837	6852138	30348516	6376536	7671904	4433216	35014136	1	14198736	21702036	24913582	1	11496894	16467375	16482867	26711760	26711760	13503686	14044183	12310461	12599296	1	14317614	19942546	8533631	17-O-DEACETYLVINDOLINE	17-O-DEACETYLVINDOLINE [ C23 H31 N2 O5, tgt=86.40, overall=86.40 ]			(418.76624, 62356.45)(417.56543, 34099.06)(419.034, 9002.746)(419.2358, 257.82)(398.78662, 26298.707)(400.557, 14253.228)(400.21692, 16891.008)(401.7249, 16298.299)(402.2311, 53274.9)(417.46896, 139044.0)(417.6627, 31598.723)(418.66013, 8565.985)(419.5224, 867.30566)(399.29764, 73673.914)(400.59824, 74302.72)(402.6078, 91153.555)(403.23566, 41981.266)(433.73413, 4694.794)(434.53714, 1372.0028)(41…	10.5361
CPD-11835	1	1	1	9135342	6326751	3168794	3455405	3168118	2974742	1	1	1	3032426	1	1	3242407	3342104	1	1	1	1	1	1	1	1	1	1	1	1	1213059	1	1	1	1	2366028	1	CPD-11835	CPD-11835 [ C28H48O6, tgt= ]			(485.3526, 7911.44)(486.3677, 2033.93)(463.3361, 2078.51)(465.3468, 2945.39)(465.3443, 3584.01)(469.3657, 34862.66)(501.3949, 15963.91)(502.3958, 2033.48)(480.36728, 13077.601)(481.3712, 13161.316)(482.3685, 2460.705)(504.63858, 97088.625)(505.6753, 26332.084)(506.33978, 6595.2603)(485.96027, 10607.921)(486.82977, 12982.235)(488.3318, 4607.33)(491.3483, 940.46)	19.6119
CPD-11837	1	1	1	5161031	1	3433405	4353442	1	5401343	6001612	1	1	1	1	3709389	1	5335335	3851851	6245502	1	1	3039779	1	1	1	1	2204805	2204805	1	3828457	1	8489031	1	4711808	1	1	CPD-11837	CPD-11837 [ C28H48O3, tgt= ]			(435.25592, 5216.1265)(415.35522, 10879.419)(416.3605, 16230.68)(420.3631, 11767.15)(438.48944, 3627.0664)(439.3861, 4176.1934)(415.35587, 11839.826)(416.36264, 8470.592)(417.35986, 591.3233)(432.72018, 9224.237)(433.37808, 1517.138)(455.3505, 96822.2)(456.35336, 30402.312)(457.35602, 9575.718)(437.33972, 36122.637)(438.34134, 10954.136)	26.4269
CPD-11839	5224230	1698224	6697867	9131801	9799831	3767297	4083159	8584445	5011938	5482777	1	3216153	4917273	2931106	5791550	8971196	3380519	2351228	1793320	6408414	5428895	9342489	3264018	2710595	1828623	8604420	6101994	6101994	4295820	1828419	6321781	2260006	4863224	2782092	4872000	3237434	CPD-11839	CPD-11839 [ C28 H47 O6 S, tgt=59.05, overall=59.05 ]			(512.06, 3976.1174)(514.8113, 3328.44)(494.53238, 1563.7383)(496.92654, 2528.3765)(497.80646, 3283.1)(498.3094, 5140.13)(499.3071, 734.43)(515.32117, 16824.59)(516.5234, 11543.63)(517.74854, 434579.16)(518.3246, 2098089.8)(496.34238, 89763.1)(497.87274, 64902.53)(499.26984, 25168.068)(500.31616, 47390.234)(531.46094, 156979.58)(533.312, 87609.195)(534.07904, 41828.3)(535.14215, 16982.072)(534.854…	24.8477
CPD-7411	31895204	110709880	4229794	7005075	17745448	17370158	4449374	2159376	386130400	20360020	50284684	62160304	34214144	8673700	26182190	14953616	21836964	1	5374651	8502557	13344321	11708492	17294696	14491752	14110140	12789241	21769520	21769520	1	338382	8776631	1	1	1	3783529	2554573	CPD-7411	CPD-7411 [ C18 H14 O7, tgt=99.60, overall=99.60 ]			(343.08188, 1227045.4)(344.08514, 303142.56)(345.0907, 308442.47)(346.09518, 37858.0)(360.1081, 1567.28)(346.78912, 22017.867)(365.0636, 62970.33)(366.06693, 13800.194)(367.07065, 4190.024)(368.0731, 2509.81)	18.7993
CPD-6971	53999004	38236960	35183760	41411016	31359070	35910080	44595136	45022408	40601700	20294328	41402896	53262768	40493020	48997128	47650740	39877072	1	32951408	17138422	19343864	9416313	27247456	27675660	28425972	4791465	26715546	22832912	22832912	9944165	23604896	23621272	27994450	30461704	9418163	22324234	10127451	CPD-6971	CPD-6971 [ C20 H25 O4, tgt=84.26, overall=84.26 ]			(329.8045, 266587.94)(331.18076, 63529.74)(332.85153, 10560.435)(333.35, 2533.42)(311.7936, 264073.56)(312.2396, 137022.8)(313.17252, 35082.73)(335.19925, 2424.3684)(314.18167, 121025.35)(315.5492, 17207.686)(317.13208, 8060.7837)(317.1852, 13999.67)(348.36258, 6054.9463)(349.3118, 29739.693)(350.2143, 7509.387)(330.85416, 8212.849)(332.2091, 47474.46)(353.16785, 8486.945)(354.1711, 16976.643)(35…	11.3309
CPD-7414	1	1	1	946527	1	2229328	1	2354369	1	931083	1	1	1	2702845	1	1	1	1	727396	511077	1346529	877025	1	673709	1	1	605099	605099	520024	1	1	1	786031	1	1	1	CPD-7414	CPD-7414 [ C40H56, tgt= ]			(540.02716, 15342.909)(541.25397, 10324.627)(542.0577, 3703.0757)(540.1163, 28719.025)(540.95154, 14286.325)(542.4626, 2085.58)(556.9767, 1188.335)(559.8859, 8103.123)(560.42365, 2241.095)	28.8197
CPDQT-341	2882479	2569817	1026670	10646317	8698341	12255371	8280785	1627227	8194307	7144447	8201255	7396462	8946432	9689568	9775977	9166584	9081047	7828894	5228164	8524622	5485069	4087471	3045238	10904504	3101434	6550052	2813175	2813175	4078010	1226156	2760004	9603467	14710237	7694807	1	8038403	CPDQT-341	CPDQT-341 [ C6 H13 N O S, tgt=70.98, overall=70.98 ]			(149.6305, 105553.63)(148.07272, 8707.946)(130.33717, 86440.33)(134.06006, 4825.245)(149.56099, 22644.264)(151.07712, 8826.254)(132.06317, 67066.61)(133.36635, 3907.0142)(134.0662, 441.49805)(168.10475, 13320.775)(148.06677, 15288.009)(151.0948, 4486.58)(171.14806, 36937.016)(171.35695, 10568.61)(172.05994, 347.94186)(153.31485, 3564.5312)(156.54955, 2405.0898)	6.44245
CPD-6975	4844808	2565395	1	4126438	3954858	3392450	3834653	3664774	2055174	7095988	3926003	3926509	4250410	6347100	3565495	3454364	3054323	3270027	1924428	2617655	2287753	2774469	1543514	6711186	2198099	1	2634593	2634593	1	1	1	3789618	3820193	2021954	10422900	10061243	CPD-6975	CPD-6975 [ C19 H21 O5, tgt=88.51, overall=88.51 ]			(331.38205, 27608.379)(332.34756, 9003.295)(332.64465, 2154.58)(313.37137, 7242.3916)(313.6377, 8715.865)(313.1277, 6574.25)(331.35, 130026.54)(332.7122, 16776.908)(332.1558, 1308.7866)(314.0634, 24059.143)(315.27917, 7287.611)(314.141, 973.21)(349.2274, 8083.0625)(349.6222, 3573.91)(351.1844, 1378.8)(352.1909, 1598.88)(329.7511, 52548.805)(330.1671, 10576.415)(331.1852, 1117.13)(353.90768, 2501.…	12.0278
CPD-6974	139001152	88641496	47234876	49740904	49048088	31445398	51956096	43762220	85165400	73267552	32642660	44986964	1	32118120	54825576	81126816	1	48317000	132190712	176575744	1	1	144929440	54967084	89772240	95387184	1	1	140060512	86721544	1	39376196	70186568	138196112	1	151164848	CPD-6974	CPD-6974 [ C20 H25 O5, tgt=96.11, overall=96.11 ]			(347.1721, 5395.94)(327.16006, 4091014.2)(328.16327, 945314.6)(329.16745, 136650.92)(330.16913, 17617.33)(366.78488, 3039.5916)(367.21475, 3497.7449)(368.2205, 344.37)(346.95203, 151770.23)(347.80484, 51135.883)(348.20566, 27564.205)(371.16922, 8634.303)(350.14474, 128411.65)(351.1502, 25691.268)(352.15686, 2983.6465)	24.0694
4-AMINO-4-DEOXYCHORISMATE	1	3476416	3525231	3805292	2717619	1751229	2307758	1	1866348	564273	4077207	1078984	1736587	488241	3339258	801199	1	1499144	7149996	1586524	1	1230025	6859069	346056	2905792	3779012	1514375	1514375	595842	1	7037090	437874	1	1	4420427	3654517	4-AMINO-4-DEOXYCHORISMATE	4-AMINO-4-DEOXYCHORISMATE [ C10H10NO5, tgt= ]			(227.61884, 3327.7178)(225.0605, 131.68)(206.79784, 6551.82)(207.04855, 544.49)(227.4432, 904.0226)(207.86288, 8019.6025)(208.65076, 1181.898)(244.38715, 6169.2896)(245.66882, 3370.2756)(245.0967, 97.54)(247.0999, 3679.56)(225.25421, 24142.182)(225.97864, 1676.3821)(228.3396, 235.57)(248.11325, 3208.7227)(230.03761, 2558.9133)	3.42639
CPD-11846	3685651	4510879	4716085	2582323	2991226	1824830	5064725	1966445	3806582	3872552	4712945	4298808	3829835	3521095	5333160	2828757	5122335	3305636	3645410	3644917	3324781	1	2505189	2116227	3763578	3817660	4920555	4920555	2937862	2663665	2376886	2953872	4958151	3680194	4325620	1825980	CPD-11846	CPD-11846 [ C12 H11 N O5, tgt=81.15, overall=81.15 ]			(249.06111, 69066.86)(250.06511, 7047.636)(251.06674, 335.8986)(231.05038, 85320.14)(232.05438, 8883.745)(233.0558, 986.23065)(254.31331, 10338.699)(237.0761, 163.25)(270.50043, 6968.741)(271.60785, 4373.872)(272.1068, 371.55997)(252.35341, 3873.2156)(253.02118, 4330.3994)(253.0987, 2367.44)(274.60077, 1559.6691)(275.89352, 2233.2917)(257.04742, 862.66174)	16.1529
CPD-11847	1249784	1	1	1295227	1125789	1063864	1	924721	927159	1774673	1653861	1106216	1106402	1	1	953949	1	923605	2325796	1433419	3704161	1	2976197	2386563	3103276	2445602	1	1	1064458	3458549	2058778	1479001	4846196	2042139	3016527	2499863	CPD-11847	CPD-11847 [ C12 H11 N O6, tgt=78.78, overall=78.78 ]			(267.0708, 393.16666)(249.24374, 11106.761)(284.92957, 319.125)(266.08475, 13830.558)(267.08685, 1752.1343)(272.04248, 2885.426)(273.54266, 253.27501)	12.9059
CPD-11845	86573856	15496427	32578348	23546426	21680516	1	21387020	14143408	16914468	79760304	22491248	17144756	23201004	21909808	14382299	16697636	20893618	79863008	16640706	10738978	19390594	12405136	17844680	9802516	36424648	36009784	18304192	18304192	17450664	9142798	969993	24683724	30610580	9215495	10912991	1847506	CPD-11845	CPD-11845 [ C13 H13 N O7, tgt=87.87, overall=87.87 ]			(295.8169, 13848.661)(297.07236, 14775.82)(298.07648, 1535.54)(281.0695, 73.94)(298.0809, 124.75)(279.06885, 41457.004)(280.10498, 3625.6387)(281.07196, 343.00067)(282.0781, 882.14)(314.92786, 2616.484)(316.44052, 7222.4937)(316.60965, 1619.515)(299.82138, 12871.624)(300.1081, 18347.94)(319.01797, 9326.641)(322.07053, 12307.983)(323.07443, 12544.262)(301.48065, 1096.8215)(301.0496, 62.15)	3.16514
CPDQT-300	1	1	570001	1157001	994635	667061	1212849	970867	1529253	3186273	1310931	1025826	1	1118234	582001	951457	1	492835	1395437	1061693	2416896	1908127	2209500	1332639	1796301	1360245	2128857	2128857	1	2042381	1	801619	3100272	1199811	1874383	1509782	CPDQT-300	CPDQT-300 [ C16H30NO9S3, tgt= ]			(477.1635, 18229.686)(477.19485, 5873.9624)(478.1176, 671.212)(462.09094, 4779.533)(462.4304, 1075.2999)(479.6118, 3133.4675)(478.1152, 2065.54)(479.121, 275.95)(461.7201, 20980.361)(461.70712, 5686.194)(461.11362, 1200.1527)(496.57025, 1655.7971)(497.8107, 260.1)(478.05237, 2442.536)(479.50726, 31432.623)(481.12903, 5468.52)(482.1331, 493.72)(500.6916, 2122.6816)(501.70053, 5855.743)(502.1049, 6…	15.6159
DIMETHYL-D-RIBITYL-LUMAZINE	1862162	1	2314080	1597785	1	1131606	1842629	1468830	6068564	1545814	1	1933722	1312431	1424113	1660007	1	1	1214559	5195209	1	4668732	1	7432394	4074683	4502226	4917749	1	1	1	4236604	1	1189191	4407003	2964472	5190437	1	DIMETHYL-D-RIBITYL-LUMAZINE	DIMETHYL-D-RIBITYL-LUMAZINE [ C13 H17 N4 O6, tgt=89.80, overall=89.80 ]			(325.28076, 44005.188)(326.11685, 3954.92)(327.12, 805.54504)(307.0994, 2025.72)(308.0918, 284.98)(328.1245, 1178.3099)(331.1303, 810.24)(310.70068, 2651.6018)(311.48288, 2160.299)(347.28558, 2644.1602)(325.5425, 8621.106)(348.85706, 130319.53)(349.35983, 12048.531)(350.11295, 1294.4166)(332.0983, 4931.01)	19.37
CPD-11852	7555363	2433348	1	6230112	12639755	4670246	7173450	10239884	20928558	18709852	19132688	8285360	1	8886022	1	3141803	5829229	14026315	17252880	1	12722345	44101496	23595164	6775063	12187387	1	1	1	12401988	15928592	11849384	1	12930287	40396872	9717959	8387546	CPD-11852	CPD-11852 [ C19 H18 N O4, tgt=84.74, overall=84.74 ]			(327.96667, 523.19)(309.427, 1932.6978)(310.5248, 704.63)(329.1387, 642.35)(310.78156, 3126.4507)(311.80008, 2381.3567)(312.1353, 490.95)(344.5618, 21565.834)(345.6627, 1736.245)(325.91107, 16392.934)(327.15662, 32642.93)(348.1529, 152204.86)(348.35327, 37942.78)(349.21268, 8000.7817)(350.1231, 141.09)(329.1022, 115681.29)(330.14243, 21526.69)(331.10678, 3895.7222)(332.1147, 89.76)	21.1227
CPD-6949	1	21378004	7448790	20419896	19448684	27244436	34962352	1	22235412	19451332	21286418	4720453	13804646	1	52492172	1	1	10290230	1	1	1	1	1	1	12394498	1	11105494	11105494	1	11587512	1	1	1	1	1	1	CPD-6949	CPD-6949 [ C30H50O, tgt= ]			(426.50693, 6897.2715)(428.39505, 5640.0103)(408.37103, 7963.761)(427.39142, 16227.4)(428.3965, 5541.2744)(409.38266, 65515.977)(410.38617, 20511.203)(411.3908, 1966.3485)(412.3941, 166.78)(444.4178, 7978.59)(445.42075, 2664.8818)(446.4321, 252.095)(426.99765, 1607.1294)(431.427, 771.39)(449.5611, 2494.8306)(450.6241, 450.1359)(432.97186, 5276.6846)(433.3699, 172.23)	29.889
CPD-12355	4139885	1	9227484	7431084	6875818	8206723	20676232	12785459	4524373	1	1	19800236	19431758	23456572	9617277	14584567	10557776	3476155	2696996	11148170	17646088	1	3240820	3160340	3104207	10759950	3460412	3460412	7325437	1958637	3953849	5383419	1349526	2062636	3325164	2934842	CPD-12355	CPD-12355 [ C19 H25 O7, tgt=97.17, overall=97.17 ]			(366.08737, 45080.984)(367.2897, 11662.946)(369.16824, 4725.63)(348.33203, 45088.387)(349.36642, 10856.445)(349.1511, 1668.6188)(350.1643, 464.99)(367.74417, 6636.683)(367.16815, 4028.835)(352.49973, 12931.511)(353.16855, 5431.825)(384.41397, 26746.268)(387.84412, 52963.49)(388.20883, 41356.023)(367.69153, 7423.58)(368.86, 9939.02)(369.6952, 19778.559)(390.3854, 6549.909)(392.00665, 2960.9292)(39…	12.3927
CPD-6948	1	21378004	7448790	20419896	19448684	27244436	34962352	1	22235412	19451332	21286418	4720453	13804646	1	52492172	1	1	10290230	1	1	1	1	1	1	12394498	1	11105494	11105494	1	11587512	1	1	1	1	1	1	CPD-6948	CPD-6948 [ C30H50O, tgt= ]			(426.50693, 6897.2715)(428.39505, 5640.0103)(408.37103, 7963.761)(427.39142, 16227.4)(428.3965, 5541.2744)(409.38266, 65515.977)(410.38617, 20511.203)(411.3908, 1966.3485)(412.3941, 166.78)(444.4178, 7978.59)(445.42075, 2664.8818)(446.4321, 252.095)(426.99765, 1607.1294)(431.427, 771.39)(449.5611, 2494.8306)(450.6241, 450.1359)(432.97186, 5276.6846)(433.3699, 172.23)	29.889
CPD-6947	14736104	7571440	6739558	17975324	21724698	15809485	5945018	7882782	1840744	16912388	8431118	23062006	12109791	1	21054408	5015335	5179472	10090543	21478766	31785422	5334316	10492895	20112716	11112839	7371967	19587152	26684468	26684468	7060022	18741856	17291794	18986252	36008648	15809406	13067408	20250636	CPD-6947	CPD-6947 [ C30 H44 O2, tgt=80.06, overall=80.06 ]			(436.3309, 10150.014)(418.85175, 12344.352)(420.33163, 12477.707)(437.3414, 146496.11)(438.37476, 48330.895)(439.34665, 8171.973)(440.3632, 196.37)(420.55655, 34981.312)(420.32693, 18183.584)(455.51196, 18884.041)(438.5442, 11928.873)(440.3722, 16679.555)(461.73032, 16739.238)(463.75662, 12145.711)(464.42557, 12493.099)(464.6769, 5206.053)(465.3431, 2805.96)(441.58865, 8303.666)(442.75766, 2765.3…	28.639
CPD-12353	1	1	14557834	49196420	1	16226993	26053866	23965022	1	56401220	36737664	1	1	1	27557162	1	87247536	1	1	1	1	1	1	1	1	1	1	1	1	1	1	8616003	17930328	13576097	15959747	1	CPD-12353	CPD-12353 [ C20H26O5, tgt= ]			(346.17905, 1540.405)(328.16412, 767091.75)(329.16635, 188923.05)(330.16907, 12871.874)(351.70264, 2065.915)(330.17783, 144137.88)(331.18274, 23572.533)(332.18185, 4901.215)(333.1848, 417.18002)(334.1912, 384.66)(367.7954, 12771.365)(367.55734, 3625.55)(368.2231, 3196.38)(369.2301, 26378.37)(348.65445, 47352.39)(349.61465, 14563.38)(351.21646, 5426.4727)(369.17206, 6415.518)(352.15897, 9098.508)(…	19.41
CPD-7408	1	396448	528140	600360	722241	904298	547568	854431	1	908234	490446	424982	634598	752700	867839	662233	286339	1149112	2672436	9851106	12057344	1872705	1	477881	1369355	6625239	3991037	3991037	559028	1072159	7571455	4843656	7715067	6297109	535110	763561	CPD-7408	CPD-7408 [ C40H62, tgt= ]			(543.16406, 6123.6084)(545.84937, 45173.336)(547.6696, 93924.27)(548.50336, 110092.914)(544.3262, 35114.66)(544.99896, 10643.296)(545.49945, 1260.0267)(546.49744, 113.35)(560.828, 21016.646)(561.52356, 15322.431)(562.5259, 4053.015)(568.47675, 7482.3154)	29.5855
CPD-12351	1	8264819	8071087	11294511	4518288	4670589	8099108	6771887	5646389	4707772	7767361	9258952	4172155	1	7492379	1972901	3026173	1	5225612	2200005	1723578	5636617	6310662	1	6140228	4645497	5070831	5070831	4147471	4076604	2089088	7994917	4058810	4970590	2021367	1	CPD-12351	CPD-12351 [ C19H23O6, tgt= ]			(347.473, 42937.523)(348.7613, 9657.071)(349.62616, 2057.7544)(350.15936, 295.33002)(329.9763, 9684.834)(331.6483, 1790.9618)(348.16034, 3795.855)(331.02426, 38881.48)(332.60886, 11201.059)(332.65573, 1390.4949)(367.6264, 3066.2378)(368.44208, 3732.7786)(369.1992, 29365.11)(350.17944, 1283.6499)(371.98395, 1484.9028)(373.24756, 12200.678)(374.06696, 30029.072)(374.79865, 25986.793)(375.15018, 109…	10.8326
CPD-13456	8088965	18035228	1	8526504	7904963	11614984	1	7028454	29801244	7142254	16892040	15258714	10755680	27938910	14593073	4891133	6400090	28416562	2662516	2219424	2172087	1592021	1902375	3677319	2033618	4815420	1658469	1658469	2777686	2847036	2520592	2172324	1625573	3957193	2317043	5163538	CPD-13456	CPD-13456 [ C21 H16 O7, tgt=92.19, overall=92.19 ]			(380.08725, 1950.5629)(381.0948, 378894.4)(382.09793, 75824.1)(383.10068, 12820.648)(398.5681, 42552.38)(400.12836, 15180.399)(401.1323, 2616.5947)(384.1194, 3726.09)(403.07755, 3054.6133)(404.08105, 877.28284)	23.6931
CPD-13455	3175969	2785542	1899089	2183766	2951357	969951	3019199	2820061	3225194	2281651	1749720	990978	1549018	1425383	3231956	3900412	3646865	1312952	4612039	5845314	5382797	5491168	9783968	4662816	1	5410408	6706916	6706916	4232839	5138076	4870707	1	5039062	7235868	2059518	985726	CPD-13455	CPD-13455 [ C21 H16 O6, tgt=64.72, overall=64.72 ]			(367.1925, 12057.621)(368.1067, 2689.5945)(369.10477, 950.2767)(348.9718, 2859.0342)(349.9678, 2083.4824)(350.0911, 2862.2)(365.77307, 12164.992)(366.51422, 1170.9618)(351.24854, 184458.67)(352.1085, 27888.096)(383.7991, 2062.4207)(385.63547, 10694.243)(387.14575, 63148.656)(366.74994, 1173.0112)(368.79562, 1083.73)(389.4646, 2116.2012)(373.83713, 1936.7)(373.0796, 4967.03)	12.2011
SYRINGETIN	3375503	3620230	970870	1989041	3200472	3419712	1	2019899	1	3186399	3263080	2189460	3789405	3519317	2963109	2748200	3891427	15406294	1	4100363	7910340	6201660	6747724	1	6172780	1	9260012	9260012	5415612	4899443	5229766	2925985	5315432	1	8240544	4244931	SYRINGETIN	SYRINGETIN [ C17 H13 O8, tgt=68.32, overall=68.32 ]			(346.00577, 6950.7476)(328.0579, 12197.26)(346.06934, 3413.2708)(347.07312, 838.4783)(328.2028, 2257.2075)(363.09796, 146433.7)(364.1005, 17145.553)(365.1024, 1963.7533)(349.09082, 2741.5535)(350.0934, 1086.1)(351.0477, 3056.33)	18.928
CPD-6951	1240795	1515652	1	1076267	2411355	1692905	9779287	1472084	588932	6320591	1936061	1786104	1519211	1864611	5276099	1454406	1465033	1324054	18528112	2499254	5731730	4677146	7930305	8729224	6148471	2636688	7155120	7155120	2390561	4723328	2710279	13554433	13252158	3317679	1645191	2091412	CPD-6951	CPD-6951 [ C30 H52 O2, tgt=81.03, overall=81.03 ]			(445.73, 1702.9379)(446.73334, 1432.2924)(447.65253, 4686.0728)(448.40662, 461.97665)(426.74625, 6989.084)(428.39673, 3308.85)(449.91968, 274.64502)(427.39252, 31042.389)(428.39685, 10577.286)(463.80453, 2961.7715)(464.43115, 3661.8567)(465.4335, 1354.35)(444.41888, 13582.537)(445.4207, 7559.9736)(446.42404, 1148.2067)(447.4195, 100.6)(468.52243, 37323.79)(469.39093, 11186.42)(470.50833, 2688.662…	27.6519
CPD-6950	1	21378004	7448790	20419896	19448684	27244436	34962352	1	22235412	19451332	21286418	4720453	13804646	1	52492172	1	1	10290230	1	1	1	1	1	1	12394498	1	11105494	11105494	1	11587512	1	1	1	1	1	1	CPD-6950	CPD-6950 [ C30H50O, tgt= ]			(426.50693, 6897.2715)(428.39505, 5640.0103)(408.37103, 7963.761)(427.39142, 16227.4)(428.3965, 5541.2744)(409.38266, 65515.977)(410.38617, 20511.203)(411.3908, 1966.3485)(412.3941, 166.78)(444.4178, 7978.59)(445.42075, 2664.8818)(446.4321, 252.095)(426.99765, 1607.1294)(431.427, 771.39)(449.5611, 2494.8306)(450.6241, 450.1359)(432.97186, 5276.6846)(433.3699, 172.23)	29.889
CPD-14593	6479060	9224048	8904777	6244896	7033294	5595634	6723710	8049088	8753835	10294765	8289182	9333953	5003812	3728968	1452785	8101327	4069556	8644892	8243896	2223856	1989490	4839028	1	823286	1832308	1	2953194	2953194	6355109	13169620	881695	2266272	1886670	3257786	5182088	9199260	CPD-14593	CPD-14593 [ C14 H17 N O8, tgt=63.17, overall=63.17 ]			(328.73428, 4269.437)(330.23734, 2903.6675)(331.1036, 1587.49)(309.4568, 39045.35)(310.43246, 4888.2534)(311.0858, 278.426)(330.32983, 30018.277)(330.10718, 35473.81)(331.1075, 16297.39)(333.1183, 634.74)(311.8472, 844.2508)(346.765, 903.25104)(348.73706, 380.994)(328.4697, 3283.2222)(332.1344, 53722.51)(351.6441, 944.5267)(354.09384, 418.00998)(333.037, 39467.49)(334.64777, 9038.539)(336.08615, …	6.96247
CPD-14594	25151316	35323608	21481448	19746470	20373036	7912639	17054052	13639560	12513332	16242239	28768856	13981221	20726796	9865929	9561920	22389240	9661812	7259913	6057371	4180753	6185954	6431562	11929062	4570422	4928585	5016605	1	1	6393021	4417573	1533800	3476588	5788301	1	6081560	1630930	CPD-14594	CPD-14594 [ C16 H27 N O11, tgt=96.44, overall=96.44 ]			(411.16284, 131603.98)(412.16592, 24011.982)(413.16837, 3604.06)(391.1439, 272.94)(414.17358, 657.98)(395.9512, 5063.5146)(395.36087, 1903.2908)(397.16797, 23335.56)(427.26367, 5433.52)(428.48102, 1739.0842)(432.2052, 56288.434)(409.89322, 27775.299)(411.18936, 1887.3)(433.14908, 4278.753)(434.1508, 3880.489)(437.15942, 13527.484)(414.74472, 467866.2)(415.138, 113058.945)(416.14062, 19527.328)(41…	19.8548
CPD-14592	7643050	983531	70123984	67100248	70861560	68186080	64351296	68701624	13616311	67381304	9761653	71834288	65437392	65263424	66187856	66797084	934218	65958576	1854725	945340	1603166	933070	1878784	2734608	1052325	1949897	21620700	21620700	1641292	2142044	2659724	2126775	1840998	1174508	818650	2056798	CPD-14592	CPD-14592 [ C8 H7 N O3, tgt=69.32, overall=69.32 ]			(168.91226, 826.4799)(151.3759, 989.536)(152.0444, 281.04)(166.4714, 2624.6504)(152.6359, 1263.7068)(183.07869, 771935.44)(184.08075, 72314.79)(167.10168, 9908.123)(168.07292, 1250.66)(189.03606, 65200.934)(190.0393, 10993.487)(191.0414, 997.07745)(175.0353, 117.57)	14.0138
CPD-6959	5349269	2996228	3088732	39290288	1456493	3494197	4862847	1	4789706	4967421	1295176	3707679	48522408	14033274	4383454	5043257	42576268	1	3019155	3293413	50297392	1	2193175	2864389	2745425	2443702	51203992	51203992	22812364	23804426	11161144	3103738	1	2427254	33428240	11165786	CPD-6959	CPD-6959 [ C16 H16 O3, tgt=53.57, overall=53.57 ]			(257.32022, 13518.857)(258.15747, 23216.81)(259.4277, 2841.1123)(260.32138, 2292.44)(241.89444, 3297.6643)(242.36136, 6794.3)(243.1139, 6427.27)(260.3767, 5609.7017)(261.379, 2211.2725)(241.2045, 7543.6846)(241.78226, 5176.0044)(242.1174, 156.04)(274.26788, 2223.2837)(258.28284, 26122.176)(258.80746, 17415.15)(281.49054, 1895.966)(281.77356, 6245.5366)(283.30908, 7322.272)(262.75983, 5117.597)	4.32872
CPD-14596	7541980	12224739	5460482	6643098	6386306	9629488	6657723	6026481	17741840	4800575	10348467	9417278	8375686	16622409	11396232	4141664	6562058	17113742	4334575	5028772	3571464	3362353	1236395	2210148	3301638	2494990	2645471	2645471	1520951	1656534	2349064	4416412	4437116	2114465	3332910	2041722	CPD-14596	CPD-14596 [ C17 H29 N O11, tgt=91.44, overall=91.44 ]			(423.23755, 8999.619)(424.1867, 2548.26)(425.20062, 1300.9551)(405.33328, 13617.114)(407.1724, 1969.98)(425.6142, 66670.49)(426.7877, 16012.422)(426.18408, 4314.5083)(427.1842, 259.805)(409.74875, 21132.844)(407.16953, 1660.4615)(408.172, 242.215)(441.43192, 3013.7927)(442.81866, 5957.102)(443.23285, 599.865)(425.16214, 17386.03)(426.36063, 18053.385)(427.2095, 46338.34)(448.17114, 41782.785)(448…	20.7211
CPD-6954	1488108	3316411	570335	1614987	1079073	2454736	1976241	1125731	2990749	3699080	2621446	1533388	1584649	1979777	1479905	2443258	1287727	1349387	4965654	5776950	8383719	7186680	5371875	3826256	6444437	2933399	7087710	7087710	4021316	4931955	6068259	2042060	6450530	4699048	5485869	6578397	CPD-6954	CPD-6954 [ C15 H13 O6, tgt=99.29, overall=99.29 ]			(271.06052, 161748.8)(272.06372, 27802.928)(273.06647, 3721.8425)(274.0644, 236.99284)(290.0828, 3698.66)(309.44547, 456.54666)(292.1, 215.65999)(293.1036, 1249.34)(315.00897, 1847.9994)(315.0698, 2991.09)(297.05768, 857.6841)	17.0203
CPD-6956	1	366721	324315	613736	558992	1	549433	598305	557231	769541	674599	1	338585	1416857	1	652878	1	422255	232197	465132	123405	1	184720	684993	673252	770388	438531	438531	290952	665909	330550	490669	548690	185589	656098	515412	CPD-6956	CPD-6956 [ C13H9O4, tgt= ]			(233.00485, 5221.5977)(211.87592, 1099.0417)(215.0523, 1479.15)(231.81256, 3170.7485)(231.06126, 667.0485)(212.54765, 3137.4617)(249.89883, 11486.952)(250.97884, 4998.045)(250.59601, 1863.865)(231.03006, 2819.2668)(231.82729, 2067.56)(255.74326, 2074.124)(256.60678, 1042.0845)(254.0322, 339.37)(237.0386, 4958.41)(238.0379, 3415.81)	10.4169
CPD-4619	7030813	5482768	3918838	4901177	4250403	6137666	3124724	3747327	5118981	5988440	4435413	6446797	5901164	6123489	4846352	4863110	4899044	5607457	5423880	6197651	5862109	6371763	4703217	1	6088798	5363358	8388984	8388984	1	5033547	4431233	4267079	5424270	5473025	6632101	2969939	CPD-4619	CPD-4619 [ C16 H23 N5 O6, tgt=87.96, overall=87.96 ]			(381.71384, 1756.374)(382.97098, 9407.976)(363.56757, 8279.406)(366.7026, 70370.19)(367.91727, 34001.434)(368.1685, 14090.747)(382.27173, 2643.0583)(364.1613, 10269.454)(365.1566, 440.08)(399.45068, 4071.918)(383.04388, 7587.351)(386.2014, 15455.84)(404.15543, 235522.2)(405.1605, 48324.01)(406.16327, 9131.056)(407.1625, 847.1937)(390.2977, 27136.977)(391.15295, 34199.19)	12.4307
CPD-8198	65598156	1	56934116	58312972	1	67873832	68440976	57123736	58090764	46928528	56562800	61683536	74578920	74053256	50751640	70314248	57556784	61429740	1	1	54484184	60268928	1	57428264	53979396	64374888	72578856	72578856	40835880	55396144	1	49487072	50750444	1	57453464	33666432	CPD-8198	CPD-8198 [ C13 H24 O10, tgt=97.56, overall=97.56 ]			(342.53143, 551.81396)(322.8202, 1111.5354)(344.86832, 494.35712)(325.02902, 4127.382)(326.0985, 533.2595)(326.1415, 166.23)(359.13614, 14775.091)(360.17395, 2251.9055)(361.1831, 389.8)(340.16092, 2036107.2)(341.45074, 216044.14)(342.55774, 39050.3)(343.1715, 7454.125)(365.12793, 1701.365)(345.11588, 181117.27)(346.17535, 23395.453)	10.6919
CPD-8192	3995015	4416231	2497858	3034115	2212978	2347871	3758281	2927767	3890018	4233583	3537527	3478876	2745990	4882073	3489332	2183525	2979240	1892333	5139842	5766286	5047459	4523268	3176719	2140540	3374140	3886608	4518503	4518503	1759808	2202955	1661545	2668601	2928582	4327362	5833090	1	CPD-8192	CPD-8192 [ C14 H14 O3, tgt=94.21, overall=94.21 ]			(232.10048, 2585.166)(213.90846, 3481.4187)(231.10217, 170472.33)(232.105, 29234.588)(233.09813, 8209.487)(213.34952, 9734.282)(214.70966, 2868.393)(252.2962, 9722.041)(252.1425, 8921.4)(233.5574, 20570.434)(235.13396, 7267.999)(239.41829, 456.52002)	15.613
6-O-METHYLNORLAUDANOSOLINE	9245617	1	6214596	2791264	5442045	3560218	1	5595489	7740561	10491781	5785358	1	6760319	1	1	5312716	7224485	8099516	6346717	1	5080621	6037506	3365006	3548245	3408778	1852681	6039582	6039582	4439607	1	3360591	1	1839632	6719847	4262314	1	6-O-METHYLNORLAUDANOSOLINE	6-O-METHYLNORLAUDANOSOLINE [ C17 H20 N O4, tgt=73.31, overall=73.31 ]			(302.22244, 5776.136)(304.1486, 5696.25)(284.70282, 847.22723)(285.1234, 387.82)(303.14224, 134139.1)(286.14316, 39145.17)(323.18317, 7645.7764)(324.04117, 21770.451)(325.02017, 27288.602)(325.1878, 30238.29)(302.88458, 16454.402)(305.03046, 11234.624)(307.1717, 198.76)(329.1408, 35309.29)(330.14343, 4047.5352)(310.87894, 3448.3848)(311.67105, 726.4915)(312.1315, 1493.3301)	15.8477
CPD-8191	8051253	1474547	2513820	1843743	2320846	1	1517743	1566570	10089538	1984053	1096894	1	6203904	2629670	370875	1470490	13738020	1535298	2030810	1	4028695	30107396	3830139	1555404	5180868	5229979	9323208	9323208	8469185	4443272	4089136	6865712	1	658235	1	1365641	CPD-8191	CPD-8191 [ C14 H14 O4, tgt=94.22, overall=94.22 ]			(248.09286, 3465.7126)(249.09558, 344.8519)(230.95444, 3154.5037)(231.08412, 1591.64)(250.10753, 14192.195)(250.8226, 4810.3545)(251.1101, 3083.7)(232.93134, 6097.849)(233.59885, 2673.465)(264.16388, 95646.95)(265.16733, 18522.84)(266.1334, 2019.1749)(267.1274, 113.12)(246.84608, 21782.727)(247.51872, 14936.706)(248.12146, 1805.78)(272.83807, 5289.965)(270.0808, 2005.61)(255.33002, 4028.2676)	8.2212
RIBOSE-1-ARSENATE	1	278731	122774	749804	1	1	607098	534615	1	250220	992683	670099	1	982034	245047	171199	1	1	1	1	1	1	1	1	122909	168692	1	1	1	577082	1	849537	202741	187540	1	1	RIBOSE-1-ARSENATE	RIBOSE-1-ARSENATE [ C5 H9 As O8, tgt=82.28, overall=82.28 ]			(271.9487, 6338.9546)(255.94434, 444.43668)(272.95798, 18561.959)(273.9605, 2065.0625)(272.97754, 1519.4634)(296.94327, 8348.557)(297.9449, 3860.528)(277.9335, 800.2)	5.20497
DIHYDROKAEMPFEROL-CMPD	1	1	490413	1399474	1001093	2083883	1	954668	2562398	1	2308136	1333312	1338553	1	1	1	1	1144808	4208275	4949484	7289650	6217971	1	3249780	5436800	2522633	6048042	6048042	1	4288082	5219216	1764723	5501446	4043238	1	1	DIHYDROKAEMPFEROL-CMPD	DIHYDROKAEMPFEROL-CMPD [ C15H12O6, tgt= ]			(288.05856, 2191.43)(271.25674, 720.04395)(271.06052, 174414.8)(272.06375, 29893.432)(273.06647, 4096.5635)(274.06485, 232.76332)(306.49786, 936.762)(288.5059, 5852.0996)(290.09387, 204.6)(293.1036, 1249.34)(315.13766, 1952.1359)(297.0571, 1239.84)	17.7701
CPD-4620	7030813	5482768	3918838	4901177	4250403	6137666	3124724	3747327	5118981	5988440	4435413	6446797	5901164	6123489	4846352	4863110	4899044	5607457	5423880	6197651	5862109	6371763	4703217	1	6088798	5363358	8388984	8388984	1	5033547	4431233	4267079	5424270	5473025	6632101	2969939	CPD-4620	CPD-4620 [ C16 H23 N5 O6, tgt=87.96, overall=87.96 ]			(381.71384, 1756.374)(382.97098, 9407.976)(363.56757, 8279.406)(366.7026, 70370.19)(367.91727, 34001.434)(368.1685, 14090.747)(382.27173, 2643.0583)(364.1613, 10269.454)(365.1566, 440.08)(399.45068, 4071.918)(383.04388, 7587.351)(386.2014, 15455.84)(404.15543, 235522.2)(405.1605, 48324.01)(406.16327, 9131.056)(407.1625, 847.1937)(390.2977, 27136.977)(391.15295, 34199.19)	12.4307
CPD-4621	5227393	4259630	3029757	7848510	3351745	4094517	4971421	3610062	4149630	1	7679234	5605404	4124243	5840773	4322300	5576276	5215384	6334563	5405258	3051044	1383194	2450242	1	4230551	4699280	2249520	4241914	4241914	3865946	5530787	1	1357366	2476977	2671546	1	1	CPD-4621	CPD-4621 [ C22 H35 N5 O11, tgt=68.99, overall=68.99 ]			(547.40643, 3343.1213)(549.24396, 3314.4834)(549.99524, 3536.56)(550.7447, 3903.9949)(528.72754, 25016.455)(531.2301, 8209.079)(533.2306, 9322.1)(548.42505, 6078.175)(549.91516, 3267.7815)(551.5889, 1549.57)(550.2479, 847.3)(528.9618, 34565.723)(529.73486, 9387.042)(530.4566, 2066.1082)(532.575, 2741.9065)(534.241, 3885.54)(564.81287, 5140.5083)(567.70593, 4508.7017)(568.61646, 5439.2)(569.2878, …	10.7891
CPD-4622	18620056	5977285	3898209	21882504	18036784	5344728	18261044	4094746	18377360	19279950	19858236	18418104	17867140	16131672	17335120	4368835	17246320	4642884	18235264	11709410	3813068	3822331	19643804	17231456	15315281	9947932	14271095	14271095	11495776	16302076	18272824	17481810	13308725	13756468	12060530	19170288	CPD-4622	CPD-4622 [ C22 H33 N5 O11, tgt=82.52, overall=82.52 ]			(547.0431, 1314.7354)(527.20624, 5005.9463)(531.22095, 842.885)(547.5929, 4667.827)(548.12964, 11210.292)(548.2421, 15564.53)(529.544, 12255.689)(530.35596, 6446.752)(530.8679, 7060.893)(532.02136, 18018.893)(532.2213, 19530.09)(564.59247, 4235.642)(563.4511, 6449.4316)(545.6047, 32024.666)(545.04663, 16768.973)(545.65027, 5254.796)(567.6668, 11015.999)(571.72046, 3475.5952)(572.2284, 2613.55)(54…	13.3877
CPD-12371	1	1	1	946527	1	2229328	1	2354369	1	931083	1	1	1	2702845	1	1	1	1	727396	511077	1346529	877025	1	673709	1	1	605099	605099	520024	1	1	1	786031	1	1	1	CPD-12371	CPD-12371 [ C40H56, tgt= ]			(540.02716, 15342.909)(541.25397, 10324.627)(542.0577, 3703.0757)(540.1163, 28719.025)(540.95154, 14286.325)(542.4626, 2085.58)(556.9767, 1188.335)(559.8859, 8103.123)(560.42365, 2241.095)	28.8197
CPD-10129	385608	2570124	191687	2143398	1	7720375	1576341	1050823	561618	2875326	880852	398079	602966	695189	1659244	3425876	676323	251983	1682988	2195879	934283	4175646	614501	1303587	2160258	1970968	2106178	2106178	498994	1	1722675	1	1	844523	2730980	1	CPD-10129	CPD-10129 [ C10 H13 N5 O3, tgt=90.10, overall=90.10 ]			(251.74121, 2641.7932)(255.77852, 712.1767)(256.1119, 2739.42)(234.09406, 13091.89)(235.0966, 84.9)(238.1008, 923.22)(252.91982, 6498.9165)(253.78386, 1417.6849)(236.2462, 30797.416)(239.113, 116508.22)(272.0619, 8363.091)(273.1435, 12511.901)(273.28674, 12759.756)(273.94476, 6833.4424)(274.1448, 2100.98)(254.29695, 2050.062)(254.93172, 2461.334)(255.1324, 289.34)(256.1333, 1307.68)(277.94724, 50…	19.263
PHLORETIN	39882264	14385545	7892630	11350436	10496272	6945889	15276724	11120751	31304412	1343683	6864321	2803126	36106432	1	14050002	1	52037560	1	74849272	101780424	53746568	1	37620612	11839309	18801840	14381386	96435264	96435264	40307608	13357902	80538008	2169936	13474919	62634512	102326752	10654974	PHLORETIN	PHLORETIN [ C15 H14 O5, tgt=97.67, overall=97.67 ]			(278.8764, 9365.356)(256.07343, 16260.933)(278.10144, 5615.5776)(257.0816, 1309626.0)(258.08493, 222936.61)(259.09045, 33591.203)(260.09567, 982.56)(292.5865, 3211.2341)(294.06238, 6927.3457)(274.60764, 1583.0435)(275.77798, 453.14664)(297.32764, 344.88748)	23.8721
PYRIDOXAL_PHOSPHATE	6539440	131632	5725883	4917429	4507537	9426612	5180318	5552325	3213869	11373678	6548794	6823771	6152291	478860	4741450	4457363	4585178	5255262	3019502	8327637	1007230	3881324	3063334	7022932	7409378	8402381	3693037	3693037	4643993	6136495	3820251	356247	4823408	3987785	6912223	4725489	PYRIDOXAL_PHOSPHATE	PYRIDOXAL_PHOSPHATE [ C8 H8 N O6 P, tgt=67.98, overall=67.98 ]			(245.00703, 27386.027)(246.0154, 2074.9998)(247.0082, 231.20332)(229.00415, 2180.24)(246.76892, 2681.289)(247.01685, 1409.0465)(266.05377, 704.45886)(249.04121, 23416.244)(250.0443, 3536.997)(270.67078, 437.54)(269.9992, 208.93)(253.32959, 10659.837)(251.9869, 3071.6)	1.71478
CPD-12362	1574645	3846598	2371857	1611597	1029276	3876002	1	1841935	1803980	911218	888486	1816573	3181189	2385590	883742	1703804	2546838	3175271	5038192	6739157	2915688	1834743	1877657	7294408	6513062	3651989	2619417	2619417	5322992	2163442	1775380	5309143	1	1258594	2784769	3528638	CPD-12362	CPD-12362 [ C19 H25 O6, tgt=82.35, overall=82.35 ]			(353.92648, 16507.723)(331.3732, 32394.195)(332.15927, 6585.8413)(333.15167, 5572.5083)(352.25287, 2190.3677)(353.1803, 609.88)(333.6217, 3049.1226)(334.3688, 7738.0557)(335.17035, 2490.7004)(368.98996, 15601.03)(370.63522, 14883.092)(351.99622, 5269.004)(353.01556, 5845.6777)(352.1942, 1492.36)(374.54727, 5422.438)(376.16446, 1127.366)(358.02832, 3370.3586)(359.1553, 225.58)	13.2985
CPD-12365	313159	332482	304124	271206	246128	260464	278032	270784	218263	413476	395646	430153	348868	310202	259153	348435	296457	324905	472811	368919	409020	485497	326136	481405	392318	384955	355746	355746	376611	163980	355581	338797	431186	541795	439062	1	CPD-12365	CPD-12365 [ C10 H12 N5 O8 P, tgt=81.31, overall=81.31 ]			(363.9227, 1582.0112)(347.0391, 158.06)(362.05258, 2238.759)(363.05554, 335.93558)(348.438, 2067.3647)(349.0539, 4830.44)(380.56558, 600719.8)(382.08304, 106324.805)(383.0802, 70683.92)(384.08328, 9193.858)(363.471, 1386.6053)(366.0718, 206.45)(386.0369, 194.04001)(368.0207, 170.52)	1.51163
CPD-12367	1274302	637609	693231	563765	688109	716840	598491	454350	1	701157	422888	655313	839626	495118	563527	631161	744740	894299	328531	474679	306591	735199	339523	210112	371511	253389	438852	438852	185786	206781	295256	266820	301835	297154	568280	204576	CPD-12367	CPD-12367 [ C10 H12 N5 O9 P, tgt=72.00, overall=72.00 ]			(395.07224, 23903.69)(396.0758, 3639.4978)(397.07462, 279.94003)	11.3753
CPD-12366	1	244586	1	520765	211479	199684	240030	230909	1	244543	258090	217804	1	360640	1	1	1	1	1	1	1	1	1	1	1	225894	1	1	1	1	1	255393	178650	1	1	1	CPD-12366	CPD-12366 [ C10 H12 N5 O15 P3, tgt=25.94, overall=25.94 ]			(538.9735, 961.0077)(540.9719, 166.79)(518.9591, 174.19)(555.9954, 177.34)(539.9861, 881.71173)(561.3499, 345.898)(561.9533, 136.72)	1.41512
N-DELTA-PHOSPHONOACETYL-L-ORNITHINE	763229	445934	380124	501157	578737	508650	1	1	187819	1	1	225134	1	1569703	273273	1	1	1	985566	45770300	768192	1933681	1	543392	461561	766792	1243657	1243657	371465	1	1153933	880132	292784	805594	1276556	577740	N-DELTA-PHOSPHONOACETYL-L-ORNITHINE	N-DELTA-PHOSPHONOACETYL-L-ORNITHINE [ C7 H14 N2 O6 P, tgt=47.15, overall=47.15 ]			(255.5625, 3030.6748)(236.0487, 2031.7632)(236.0474, 109.46)(237.0432, 105.28)(256.45337, 4289.155)(255.18294, 9577.532)(236.70126, 1071.4336)(237.39058, 10532.497)(273.90033, 2876.3628)(273.7659, 3612.0098)(274.1023, 984.09)(255.68765, 4215.6436)(276.04938, 1197.279)(261.42215, 24962.371)	10.5133
CPD-12368	1	3482341	1	612533	1	598264	657201	1	1	1	1	1	1	1	1	1	1	2717595	1742364	634023	1901163	1242147	6910205	4684676	1810427	5928279	504859	504859	5324038	4973723	749297	1679554	2505930	1507875	1	8271845	CPD-12368	CPD-12368 [ C40 H58, tgt=34.13, overall=34.13 ]			(541.7144, 3685.1455)(542.4712, 2713.6702)(542.13654, 3163.799)(542.4702, 4681.54)(561.7708, 9076.525)(562.50854, 13712.458)(563.4553, 1081.325)	30.0289
CPD-12360	8069740	7043120	5334223	4927675	3547435	4340128	3876758	3771995	4437094	1542648	2864653	4640121	6114482	7746070	5311685	11727758	4516480	2082853	1391242	3666374	2066149	8592752	913522	1416929	3257194	1	1727809	1727809	8963785	1955920	2019198	1	1	1946512	1	1	CPD-12360	CPD-12360 [ C20 H28 O6, tgt=81.23, overall=81.23 ]			(367.54947, 2807.9426)(367.7675, 1648.4344)(369.2041, 8061.95)(347.32233, 71954.195)(347.18045, 13033.441)(348.1811, 449.7575)(367.88663, 8753.684)(368.70508, 8794.335)(368.7063, 14965.024)(351.05273, 7298.594)(351.20038, 3106.84)(383.2929, 4423.814)(384.4764, 46576.91)(386.23535, 132087.56)(364.79495, 15487.614)(365.42743, 3981.4597)(366.2072, 573.91)(388.21927, 83531.234)(388.18506, 94513.805)(…	15.1776
CPDQT-349	1	2777607	4436862	801160	2098193	1159825	1144266	2113705	1847797	4043004	1	3390755	853013	2629233	778952	3120797	5120179	1243002	3505022	1587593	1446876	1146620	6501433	1253533	1335228	1860005	1394044	1394044	1258674	1948598	1	2177227	2923127	1528670	985793	1096123	CPDQT-349	CPDQT-349 [ C9 H19 N O2 S, tgt=75.98, overall=75.98 ]			(208.89958, 2957.182)(191.41434, 3564.5952)(192.1028, 1120.3185)(206.11986, 10184.01)(188.30312, 22679.105)(189.9078, 422.33)(225.1748, 17900.871)(226.1491, 8245.774)(227.1473, 25375.666)(206.13843, 96123.7)(208.2326, 49492.76)(209.1371, 17615.006)(229.04066, 3862.2708)(230.37387, 1545.6633)(231.43419, 3316.9412)(211.89258, 2286.2117)(212.79167, 4306.694)(213.0941, 221.89)	11.9974
OH-MYRISTOYL	1089635	362588	463597	242875	264053	329856	150985	332854	1	405866	1	202804	171022	234277	400744	299799	311209	647187	148271	597014	2089289	224894	399491	448241	274133	165060	88859	88859	190529	1	523705	138057	194436	121923	1	336158	OH-MYRISTOYL	OH-MYRISTOYL [ C43 H75 N3 O20 P2, tgt=64.68, overall=64.68 ]			(1021.4534, 3032.97)(999.17755, 4680.1157)(1000.4987, 3301.0447)(1001.43475, 1061.8779)(1002.4411, 149.60667)(1021.7685, 2870.7437)(998.43555, 2019.758)(1035.9484, 8516.636)(1037.4012, 7145.5645)(1038.406, 9979.383)(1039.4978, 6534.8516)(1040.5033, 3104.9268)(1020.4887, 81.83)(1039.4211, 208.95)(1020.4105, 911.67303)(1021.4002, 248.57)	18.676
CPD-12399	1259968	1854788	1348184	3021886	1798304	2946276	12404325	2589668	10958081	1755580	1515529	2439912	7527536	7269619	4740571	1973048	2219910	5859345	5415359	7512821	1843828	1881099	8392594	10776797	2640253	1	1	1	2648443	6376604	1502045	3843984	3837281	6099650	3085176	4369585	CPD-12399	CPD-12399 [ C18 H31 N4 O7 S2, tgt=75.47, overall=75.47 ]			(484.36337, 12912.471)(484.1669, 326.3)(485.1598, 296.44)(462.72388, 8105.261)(463.40283, 6293.3203)(464.1461, 1308.12)(482.6386, 18064.3)(484.06424, 7965.9165)(482.18094, 2540.6768)(463.52295, 2619.5232)(465.06805, 1244.8219)(466.5578, 3947.316)(468.1623, 579.065)(498.16458, 5453.156)(499.2567, 4334.821)(502.19275, 5001.4277)(479.88263, 62636.195)(480.82196, 17716.918)(504.11246, 2898.1887)(505.…	13.8641
CPD-6989	895937	301750	400965	260295	551576	384380	423983	284238	557850	315221	96530	207608	333805	663597	306457	179932	1207925	294287	1602072	3584612	869985	8186425	581859	86555	221180	514174	3607490	3607490	648712	231050	2792546	211039	420100	1248633	1	83622	CPD-6989	CPD-6989 [ C13 H9 O5, tgt=99.04, overall=99.04 ]			(248.0517, 198.91)(227.034, 98284.85)(228.03778, 14219.449)(229.0429, 2333.816)(249.29967, 23073.277)(250.0653, 2906.4358)(251.066, 566.60834)(231.16844, 43051.383)(232.05432, 4041.2515)(233.0557, 410.28497)(264.6003, 9034.186)(265.42053, 9058.288)(267.08905, 1960.0541)(267.0873, 700.29)(246.78047, 3762.6587)(246.95206, 5192.5986)(272.04254, 2124.7551)	19.3139
CPD-12398	1	2557676	3595028	2906817	4088991	3723145	7596089	2301017	7258929	1419137	1	2062667	2725725	4235494	1497663	2059190	3164945	2265635	5141039	3638200	1401905	1	5570964	1	2345123	2719751	2923920	2923920	8177269	1	3402432	1	1	3070700	1	7186860	CPD-12398	CPD-12398 [ C8H17NO2S, tgt= ]			(193.27687, 1400.9459)(194.1001, 1059.13)(174.85902, 28637.615)(178.0882, 3648.9832)(192.85413, 2980.6475)(175.42732, 9876.05)(176.09225, 1128.56)(178.0922, 444.87)(210.33206, 41366.426)(210.1344, 1019.6)(211.1256, 1393.04)(192.7637, 11000.813)(194.41173, 27385.453)(195.05583, 27691.62)(195.1228, 40843.11)(214.4804, 3838.928)(215.93141, 2994.521)(217.372, 4131.7886)(218.0852, 14062.609)(198.19244…	11.8185
CPD-12396	1	1352986	1	5591552	3302936	851044	5497801	5464138	4590430	4030916	1143823	1	5048397	1067211	1092160	1	784192	809351	878181	1	3637034	2185131	3741869	762978	4299428	5255518	4238853	4238853	2714795	2602443	1359009	1760220	3586768	3588205	1520725	3340041	CPD-12396	CPD-12396 [ C17H29N4O7S2, tgt= ]			(466.4644, 3083.5674)(468.02246, 21302.818)(468.6443, 39122.11)(469.1481, 11175.064)(470.14972, 2351.5461)(449.13702, 408.5)(468.29974, 3659.218)(467.1708, 3602.54)(449.14505, 17936.828)(449.64307, 9058.682)(451.1487, 1005.1)(454.1396, 1173.09)(486.06094, 4935.4204)(486.62488, 5088.1484)(487.68198, 1845.8866)(489.1771, 224.64)(467.3018, 8570.128)(467.83762, 22751.133)(469.0301, 26475.402)(470.176…	17.2021
LATHYRINE	5411999	4084224	4814715	1584608	2255636	2214898	3045834	1325584	5399534	5541684	8492038	1284927	3479485	27780936	1	6250158	3180349	3666147	3302252	2759071	7547742	2706588	6476207	3628179	1897163	2844353	3423086	3423086	2615468	10327280	7781965	16078197	13415905	15774169	2843334	2325390	LATHYRINE	LATHYRINE [ C7 H10 N4 O2, tgt=67.06, overall=67.06 ]			(182.22989, 58295.535)(183.08234, 5808.0483)(184.0741, 3346.775)(164.88972, 23991.246)(165.8478, 60210.94)(167.07678, 11887.6045)(168.74559, 160.59666)(184.40508, 12941.828)(185.09485, 969.95996)(166.77231, 2409.087)(204.70673, 4345.2085)(186.19861, 6391.6753)(187.112, 10205.691)(207.1571, 7659.3594)(206.0653, 241.2)(189.84259, 3774.1836)(192.0694, 1959.77)	6.37367
CPD-12395	1076200	6916320	2095298	875794	1130016	1350394	1866573	1	1256631	4605058	2162831	799032	814684	1450620	572985	401205	671907	715776	1	2404870	944420	2824582	3240358	3808483	2590317	2406159	1	1	1982843	1	1	13900901	4344126	14086369	7380973	2823979	CPD-12395	CPD-12395 [ C7 H15 N O2 S, tgt=52.45, overall=52.45 ]			(179.73413, 21218.568)(179.38086, 2932.4082)(180.0794, 6024.82)(161.43462, 22284.186)(163.5716, 6779.4424)(180.35735, 9706.573)(180.80318, 3111.5444)(160.99933, 4550.701)(162.0751, 4130.24)(195.9735, 29178.084)(196.11401, 4079.0703)(197.1176, 146.42)(179.54843, 3702.4365)(182.10896, 10237.28)(201.42825, 3956.779)(202.2835, 3988.0486)(203.17032, 3128.0308)(204.0696, 3724.58)(184.5639, 5998.0806)(1…	12.0028
CPD-4604	1	1	736288	732951	979388	3124051	409363	1	918274	897804	705829	1301011	1	1	1	1	1	1	1	1148358	927199	1	1	1092294	923117	1049852	995654	995654	4663702	851337	1	788521	1235416	910208	1321434	938826	CPD-4604	CPD-4604 [ C12H11N5, tgt= ]			(226.00589, 2017.1721)(226.10861, 3976.5627)(227.1019, 383.64)(243.5461, 15107.44)(244.13948, 7748.1904)(245.1342, 1796.83)(248.09238, 29853.965)(249.09526, 4635.4146)	9.4435
CPD-8179	1044006	862945	884522	993144	824873	1130608	905003	663980	1025756	656100	1	1028142	951270	1139642	932599	1126551	1151822	1130475	1473587	1445725	1608955	1235017	1025929	1270217	1756838	1269343	2005515	2005515	971011	931860	1338942	1090255	1943235	1364148	1993954	1246385	CPD-8179	CPD-8179 [ C6 H3 N2 O5, tgt=82.69, overall=82.69 ]			(201.03764, 74978.71)(202.04054, 9354.097)(203.0346, 2821.7852)(204.0368, 219.2)(187.76549, 1172.9344)	15.7175
CPD-12394	1502321	213740736	20502156	56775952	1881382	122864736	1142494	88361352	84738904	1153016	108462272	54550064	86706696	87553120	86168824	77863968	144299136	65431864	222883232	172508336	1	240287328	8515422	107694768	200241744	1	141674704	141674704	5137830	189492800	1	1495048	3023694	10032767	217426640	2871184	CPD-12394	CPD-12394 [ C11 H21 N3 O4 S2, tgt=56.23, overall=56.23 ]			(325.48264, 3747.0537)(327.34402, 4095.7424)(329.0971, 12841.32)(328.65442, 161290.86)(329.80237, 170206.72)(307.0968, 1349.7443)(308.09247, 227.9)(345.6308, 466.29752)(324.12152, 1780.98)(327.1161, 2128.23)(351.08594, 27052.998)(352.0876, 35492.48)(330.07373, 45110.863)(331.07928, 13639.4)	20.2261
CPD-8178	36579848	54792260	51360568	18177406	6441954	4583116	4737886	4530994	52607528	2367185	4338013	39159512	6649239	1	3868097	4380766	3302212	1	417127	62704880	312359	6370188	1269643	596260	1	2208559	376344	376344	566538	66431848	1	1957711	1705001	8486087	32444206	1	CPD-8178	CPD-8178 [ C55 H72 N4 O6, tgt=63.17, overall=63.17 ]			(884.7051, 6763.455)(885.6769, 7553.0024)(887.2706, 4402.569)(887.56067, 1270.255)(868.5341, 3406.3816)(871.05774, 6386.645)(869.5343, 9890.95)(870.5547, 7956.45)(871.5548, 3683.15)(887.0948, 10446.364)(890.5641, 14420.397)(891.5661, 13461.76)(892.5743, 16856.99)(871.0561, 10597.192)(871.68933, 5422.3154)(871.6601, 6043.584)(872.3899, 3285.5369)(872.9559, 4068.9097)(873.8096, 1936.18)(874.5552, 3…	22.3508
CPD-12393	6023957	3382017	2057532	1946768	2267099	86376256	3157144	2396754	2139943	2759173	1	1873569	5485145	123654648	2227925	2609368	2161092	2507572	2235803	4757130	6289152	3255804	2366430	1915645	2833944	2755954	1935830	1935830	1	1724776	2873991	3007705	2668184	2613076	3005951	32356330	CPD-12393	CPD-12393 [ C16 H27 N4 O7 S2, tgt=78.84, overall=78.84 ]			(454.13425, 3668.275)(452.1512, 748.84)(434.11798, 3738.645)(436.1245, 2322.68)(439.1226, 1188.79)(453.27292, 56800.71)(454.14307, 14635.696)(455.1455, 2796.483)(456.27963, 761.9808)(435.12842, 397139.97)(436.13116, 89953.97)(437.13217, 165196.44)(471.28256, 28744.752)(470.8032, 7270.547)(472.49954, 2416.1416)(473.1671, 137.21)(453.9038, 1503.5924)(452.15448, 1631.125)(453.1428, 446.9)(478.126, 2…	15.6846
CPD-12392	1206141	2381898	1142217	1718836	917860	1324913	1	1790377	1184669	2288493	1848566	2374780	1042516	4322367	1127987	1171945	693226	1660046	1703348	2097356	1	1377148	3896894	2160570	2708005	2464984	1638520	1638520	1723085	4659840	1164173	6692843	2847899	3043485	1727233	1777247	CPD-12392	CPD-12392 [ C6 H13 N O2 S, tgt=98.64, overall=98.64 ]			(168.0657, 9144.07)(146.15569, 7016.889)(164.0739, 80735.47)(165.07709, 5653.5713)(166.07103, 3455.2349)(167.074, 351.46002)(148.06029, 25382.748)(149.06393, 1769.2195)(183.09692, 442.59857)(166.1594, 1023.52704)(189.05333, 813.6664)(171.71227, 3051.6965)	1.221
CPD-12391	26757752	29525756	3399606	8056633	6378722	1	8190052	6605156	10915055	22741284	18632328	8068910	6264673	7723879	17001836	9912024	13358338	18608866	2126070	2794550	7508660	4509090	968642	662736	2325449	2136374	2997881	2997881	1	674854	2159269	2202196	2537640	2158064	2821104	1379420	CPD-12391	CPD-12391 [ C10 H19 N3 O4 S2, tgt=74.65, overall=74.65 ]			(309.08035, 38182.348)(310.0833, 4453.2935)(311.0859, 303.68823)(293.176, 43288.434)(294.62872, 6034.4854)(295.62842, 4923.8022)(296.48462, 6953.9453)(297.0708, 801.81006)(314.67, 15511.027)(315.34085, 14096.584)(293.87146, 6326.328)(330.90674, 1973.3754)(331.4473, 1761.62)(331.1097, 345.53)(313.17374, 825.8251)(311.0999, 487.06)(333.07678, 34561.082)(316.17133, 3112.1267)(319.0547, 404.8)	5.27153
CPD-6981	12935352	30116348	1	5539369	6468377	7385218	6343618	1	119441920	3990671	12233511	16809032	12233622	1	5272579	3828804	9186634	71893712	2772852	3014524	1	1	1	1	1	2321941	8953215	8953215	1	1	3007639	76370280	161357184	7554533	2461405	134861520	CPD-6981	CPD-6981 [ C18 H15 O8, tgt=83.32, overall=83.32 ]			(359.07663, 465424.6)(360.0803, 92567.836)(361.08606, 122865.984)(362.09085, 17086.176)(341.06598, 8109.5576)(342.0697, 3471.1152)(343.0842, 253.01)(361.0924, 116363.67)(343.08173, 15250.219)(380.3179, 48089.09)(378.1166, 31733.365)(379.11905, 3060.68)(361.52304, 5674.595)(363.10953, 3658.3086)(363.1132, 1053.0901)(382.13412, 7134.893)(383.06848, 662.365)	17.6084
CPD-12390	2355282	1767938	1604120	9955574	3127686	3965806	8694262	9271441	4924245	4568983	7339927	3716304	6140073	4781328	6017094	4827253	3687813	2533768	1	2105958	3471953	1894979	4511921	6227447	13748695	15876071	2143191	2143191	2895132	3995613	1406481	1	8977413	2473635	3423856	7013591	CPD-12390	CPD-12390 [ C15 H25 N4 O7 S2, tgt=64.26, overall=64.26 ]			(441.6149, 1416.4392)(443.11356, 668.86)(420.10278, 413.05667)(423.0981, 2629.22)(439.7642, 3637.9854)(440.12012, 434.58667)(421.25735, 57152.395)(422.21558, 10274.871)(423.11737, 2869.239)(457.37195, 4657.988)(458.64594, 4336.5854)(459.57922, 1805.4076)(460.81558, 2075.1484)(461.1452, 390.58)(438.0213, 12901.941)(438.1394, 3080.22)(439.1241, 136.19)(465.10278, 6003.3594)(466.10687, 1129.0479)(44…	14.3259
ADIPATE	11457608	10478333	11617746	11478308	12838164	11450231	12885494	10873848	9513508	1	11710442	14983952	5319576	10048272	10329946	10865125	10746115	5245736	6528621	9003238	11039121	7300728	76978056	14814946	12733229	10104781	15435287	15435287	115104488	13148201	5676912	42426968	9301832	8120401	11426069	10748498	ADIPATE	ADIPATE [ C6 H8 O4, tgt=75.24, overall=75.24 ]			(145.90048, 4779.903)(127.95506, 15307.957)(128.04433, 832.4712)(162.97333, 8090.986)(163.0751, 757.91)(144.207, 18253.252)(145.63387, 1001.71783)(146.0606, 434.44)(167.03392, 4849.6333)(149.60837, 154657.7)(150.7781, 6015.7974)(151.0283, 578.65)	17.7447
CPD-4602	13966360	17071412	8258528	4871211	14188280	10778753	11276497	7102847	9743068	8939204	9633008	19644872	20391878	18608900	15518811	12520452	16217048	1	18469136	1	17452606	3303245	15100631	15784469	7688373	17118764	21306714	21306714	10438757	14206569	7405653	4629039	1	3803493	1	1	CPD-4602	CPD-4602 [ C16 H23 N5 O5, tgt=77.49, overall=77.49 ]			(366.05502, 19809.424)(367.1752, 5553.292)(368.51245, 3953.7666)(369.1742, 5816.4)(347.66144, 3174.6948)(351.16992, 24305.148)(352.1691, 607.07)(366.17606, 107816.96)(367.1816, 21907.123)(368.18533, 5484.3975)(349.9204, 36204.85)(351.67447, 11985.381)(350.17377, 4080.17)(386.37225, 9196.294)(387.0426, 8672.068)(387.71194, 31192.555)(368.1045, 11292.963)(368.34286, 9009.771)(369.70413, 16181.609)(…	13.7411
CPDQT-350	2492928	1158779	1074793	1065866	3047090	3756958	4883213	1954238	2925843	2757753	2467294	3623594	5069050	1808824	6405042	3215860	1	2298843	5343065	5789834	3501560	3195564	5881809	1	5594064	5795247	2942085	2942085	1	5704000	1	1615213	22321284	1797373	16284049	1	CPDQT-350	CPDQT-350 [ C9 H19 N O S, tgt=67.30, overall=67.30 ]			(193.70454, 32008.502)(194.1178, 16830.55)(174.51695, 6280.3354)(174.10706, 8416.196)(190.33167, 80270.67)(192.21542, 2905.79)(193.1224, 109.77)(174.29784, 212542.98)(176.4483, 15020.786)(208.15411, 34824.867)(210.15002, 11965.504)(190.144, 936979.9)(192.1394, 28644.404)(193.1393, 8641.36)(214.10437, 3293.6453)(215.1069, 680.3)(195.87206, 9541.53)(196.77997, 13924.786)(197.76373, 2507.7432)	17.8193
CPD-4603	13966360	1	8258528	4871211	14188280	10778753	11276497	7102847	9743068	1	1	1	20391878	18608900	15518811	12520452	16217048	1	18469136	1	1	1	15100631	15784469	1	17118764	21306714	21306714	10438757	14206569	7405653	1	1	1	1	1	CPD-4603	CPD-4603 [ C16 H23 N5 O5, tgt=77.49, overall=77.49 ]			(366.01862, 20263.566)(367.1746, 5752.5083)(368.1817, 3231.16)(369.1742, 5816.4)(347.66144, 3174.6948)(351.16992, 24305.148)(352.1691, 607.07)(366.176, 112357.26)(367.18097, 22791.895)(368.18448, 6392.188)(350.1709, 17732.674)(353.17657, 9652.524)(386.4837, 9529.881)(387.21094, 7195.4805)(368.1107, 12121.483)(367.94775, 7514.4385)(370.2091, 21673.34)(388.16086, 473524.62)(389.90576, 48386.816)(39…	13.4602
CPD-8162	589312000	302825280	489228960	619934980	585471100	511934592	600425730	577956100	481865248	8000758	14729506	543834050	274847328	545722370	435506112	494059648	390406112	385728800	509077120	140837472	1	49542160	171131552	226724192	208231168	184362944	203433584	203433584	239393248	194020912	626173180	1	6272417	457345376	1	1	CPD-8162	CPD-8162 [ C49 H86 O15, tgt=99.64, overall=99.64 ]			(914.7453, 11202.622)(915.9269, 8855.426)(918.11145, 513.51)(917.6276, 69.16)(896.62616, 45994.68)(897.6286, 21892.576)(898.7459, 18838.271)(916.1217, 14646.243)(916.60156, 14197.719)(917.6101, 6663.3984)(899.1051, 8375.207)(900.94025, 7209.467)(903.6169, 938.84)(932.75494, 1338254.5)(933.75806, 728638.3)(934.70197, 283679.03)(935.63995, 86239.414)(936.6388, 21105.717)(917.8537, 2164.873)(918.801…	29.1512
CPD-8160	9855177	8236608	7602456	6219363	7980857	8585987	3168082	12713165	10960515	3732700	22806422	19388484	6232195	17569916	7757382	7705170	10386849	4271957	10172343	4891050	4043189	6673984	10026558	1209455	12769044	12980140	6097355	6097355	4477272	2748038	2049041	2103388	36540804	21064326	9751790	1	CPD-8160	CPD-8160 [ C49 H90 O15, tgt=44.82, overall=44.82 ]			(920.7521, 4467.7324)(922.1385, 3363.92)(900.921, 4622.9004)(902.1137, 4999.563)(902.94794, 3103.157)(904.6405, 124.89)(921.97437, 562.2733)(923.6388, 1755.9099)(923.6502, 184.98)(904.6297, 2730.104)(936.91187, 26852.242)(937.7565, 8923.178)(938.78485, 4794.993)(939.6734, 524.68)(919.043, 5031.7925)(919.66345, 3007.2668)(941.99164, 13000.26)(943.8865, 7434.9526)(945.1994, 9759.01)(946.72003, 1470…	28.2871
DEACETYLISOIPECOSIDE	8095691	6432491	12220599	3405997	15358737	7616149	5955724	10579396	1	15768631	14434741	9759111	7535235	6110438	6743155	6777460	3499456	6150960	5917390	16637057	11426927	3554438	3250498	6418173	16432872	14006092	12535022	12535022	7710849	10306896	10695279	3874424	8740330	3947419	11797713	3977407	DEACETYLISOIPECOSIDE	DEACETYLISOIPECOSIDE [ C25 H34 N O11, tgt=71.17, overall=71.17 ]			(524.4131, 21319.479)(525.6017, 6064.453)(526.21063, 2419.8018)(507.83066, 66664.945)(508.46, 23897.295)(508.7646, 10193.548)(528.95483, 3675.1882)(531.2363, 1003.13)(509.54868, 2647.3518)(511.22244, 7816.406)(512.2297, 23857.514)(542.64484, 25854.49)(543.4892, 10268.727)(544.49927, 2281.06)(526.15955, 24694.783)(527.4182, 7976.7637)(528.4135, 6661.112)(529.2477, 2057.6802)(530.2576, 2236.7134)(5…	12.7481
DIMETHYLSULFONIOACETATE	3708849	3152555	2289698	2077824	1435358	1797916	2066071	1793739	1978123	1282581	1049826	1002732	2854052	2954145	2553767	981937	1899706	776412	2821018	2855296	2685841	2386188	1907441	3112761	4718768	1438437	4666484	4666484	1419419	1031505	3849396	3092315	4953616	1975466	2321799	2486232	DIMETHYLSULFONIOACETATE	DIMETHYLSULFONIOACETATE [ C4 H8 O2 S, tgt=46.23, overall=46.23 ]			(121.02836, 15592.919)(122.036125, 18518.105)(105.01799, 6291.912)(138.6019, 16896.67)(121.05096, 157092.14)(122.04452, 2739.2285)(123.04574, 11889.23)(145.67972, 13507.299)(146.01363, 6749.393)	12.4395
CPD-8165	457312864	1123798140	322194688	814445120	731621760	761040900	1	89359720	784669700	74274584	1201358980	1359548030	121665464	1	1255572990	687692930	1	982433540	53897708	31565544	41760960	200358400	121752432	152123056	369596896	536798400	361381792	361381792	422624352	987222020	1201006210	349675584	1	402058144	532734464	939738560	CPD-8165	CPD-8165 [ C45 H78 O10, tgt=59.29, overall=59.29 ]			(782.23395, 2885676.2)(782.56537, 2159588.5)(783.572, 921283.44)(784.06885, 369758.56)(784.5852, 1832654.5)(764.89886, 196.19)(782.755, 1988041.4)(783.61224, 1043952.06)(784.62366, 2552094.0)(785.58746, 1205841.4)(765.2399, 1036.5468)(765.5781, 456.06)(797.2171, 231393.78)(798.14667, 99733.09)(799.4023, 34033.383)(799.5986, 199.38)(779.5861, 76.81)(801.97986, 69061.56)(802.9561, 50839.82)(804.306…	28.2387
CPD-8163	93007584	5865388	30611712	29296262	58657544	65467352	8976642	85916312	78677216	16839704	6707490	62056636	274241	55624408	14156818	19251074	55881392	30831348	10583585	22550428	49379448	52051812	34476220	10189189	7141840	11023036	3413756	3413756	2289106	1469193	1088598	1	9032693	8382486	2553117	1	CPD-8163	CPD-8163 [ C49 H88 O15, tgt=60.10, overall=60.10 ]			(917.32983, 14478.878)(918.3514, 9163.142)(920.62445, 4964.2876)(898.89703, 14992.042)(899.83704, 8785.295)(900.61145, 2088.3662)(920.62616, 1253.5292)(924.03937, 420.848)(900.76666, 7701.226)(901.6177, 4313.07)(902.60785, 973.98)(934.99725, 162665.53)(935.98047, 80051.56)(936.8841, 35788.715)(937.65436, 14783.887)(938.66406, 612.67004)(917.8461, 4109.6133)(919.30835, 1905.7826)(922.9743, 709.836…	28.6524
CPD-4609	1	1985832	2010965	521640	3874660	999910	2123180	1010837	941135	1286951	884800	1037405	1	1028225	1475358	441185	813429	1077493	1032298	2772532	4137947	7170567	704003	1390362	835216	2703238	4153794	4153794	1442042	2328830	3228862	1911310	2743332	4632669	1	1409316	CPD-4609	CPD-4609 [ C10H9N5O, tgt= ]			(216.41772, 6116.4624)(217.89304, 5172.631)(218.08487, 15009.88)(199.14563, 9847.058)(200.27823, 4400.037)(201.28003, 12332.273)(201.079, 2661.22)(216.17165, 4333.711)(199.2729, 28083.309)(199.07996, 5315.431)(200.07523, 2501.8062)(235.85986, 5608.3413)(237.72343, 1166.096)(216.10675, 15618.011)(219.6141, 8954.311)(220.1125, 1883.2)(240.07288, 1338354.2)(240.0747, 377580.0)(241.07881, 41836.18)(2…	9.70708
CPD-8164	589312000	302825280	489228960	619934980	585471100	511934592	600425730	577956100	481865248	1	14729506	543834050	274847328	545722370	435506112	494059648	390406112	385728800	509077120	140837472	1	1	1	1	1	1	1	1	1	1	626173180	1	1	1	1	1	CPD-8164	CPD-8164 [ C49 H86 O15, tgt=99.64, overall=99.64 ]			(914.5866, 14014.425)(915.59406, 10382.785)(916.6108, 520.0)(917.6276, 69.16)(896.5896, 49833.742)(897.5922, 22413.635)(898.59644, 29890.016)(915.8135, 18303.67)(916.6017, 15342.151)(917.6101, 6663.3984)(899.10455, 5402.94)(902.6169, 5464.49)(932.7301, 1552626.2)(933.73376, 845835.3)(934.63715, 310122.1)(935.63885, 82081.1)(936.6388, 21105.717)(919.21094, 3156.8457)(921.6382, 175.815)(937.5858, 4…	28.9905
BISOHMYR-GLUCOSAMINYL-1P	11921170	4088497	5079651	6495275	8065187	4356383	6989799	2782748	5464479	6544907	5119954	7338573	3392539	13450001	4837371	6271177	10853313	4674378	3329111	3761092	4813170	7978198	4110453	5924080	6265347	4899357	6746015	6746015	36498368	1	2352842	7789469	2224771	4935834	6791406	1	BISOHMYR-GLUCOSAMINYL-1P	BISOHMYR-GLUCOSAMINYL-1P [ C34 H64 N O12 P, tgt=69.28, overall=69.28 ]			(713.66864, 2369.0427)(713.43427, 4127.5703)(692.0278, 4719.949)(694.75323, 6852.4497)(695.4239, 5989.54)(696.4288, 3976.19)(711.9662, 9964.598)(711.8317, 5468.452)(712.43976, 1709.4258)(694.03174, 43755.805)(695.115, 19246.742)(696.25433, 9802.663)(697.2918, 2573.595)(727.5083, 5622.268)(729.4586, 25340.95)(730.4633, 12950.99)(731.4656, 1785.08)(709.4944, 7682.3276)(711.4431, 4940.91)(712.4483, …	17.9736
PROPIONYL_ADENYLATE	1363032	930122	1488067	4693138	1981547	4095275	3443862	1804030	1385408	1305910	1367912	1474056	760245	894497	640584	2886253	1344856	1229956	1230976	992770	1320411	730021	965936	5013894	1055060	1887046	2502839	2502839	2839961	3831345	3968554	4646867	2873446	2755659	1004352	3583543	PROPIONYL_ADENYLATE	PROPIONYL_ADENYLATE [ C13 H17 N5 O8 P, tgt=75.94, overall=75.94 ]			(389.08472, 489.50998)(429.07983, 595.45)(385.88144, 7895.974)(386.08972, 1382.2876)(421.4755, 54239.707)(422.19962, 10097.908)(423.11856, 1852.5216)(407.0975, 18748.602)(408.10117, 3645.386)(407.20435, 2108.568)(406.1147, 2747.2678)(407.116, 753.9681)	13.7809
CPD-12388	22747080	81860360	11708492	12867604	7825508	1	12994811	8766768	35295156	15663553	62485696	12653551	6261245	6389120	12593549	5041937	5125823	18521162	4586488	4908569	4421430	10882533	3230025	3371155	3344258	4863488	4226655	4226655	8065704	2531008	3871950	1	4400778	4512985	3957119	3734406	CPD-12388	CPD-12388 [ C15 H18 N4 O4 S, tgt=88.27, overall=88.27 ]			(351.32816, 224640.02)(352.33014, 54423.566)(353.2303, 38190.59)(354.25217, 5520.5796)(333.80417, 4927.598)(334.87048, 5749.119)(337.0928, 1137.82)(353.32745, 2199.486)(336.01685, 49363.97)(336.174, 16269.808)(335.10623, 6486.1865)(372.18347, 3345.4468)(369.1423, 366.81)(350.68497, 165765.8)(351.1403, 10162.05)(377.0262, 104020.37)(376.82666, 53661.09)(375.10098, 32933.88)(376.1045, 4376.143)(359…	12.1592
CPD-4610	8628305	1	6002211	7128812	7417760	7770240	7301717	5992753	6679584	7320506	1	9518635	9245426	8538641	6879012	7693841	7843381	6737369	9849997	9407170	8181530	8732877	8713131	6560764	7402153	7883371	9942756	9942756	5599806	7932611	6850606	5917941	6401704	9493650	10241683	5921163	CPD-4610	CPD-4610 [ C16 H19 N5 O6, tgt=86.28, overall=86.28 ]			(379.0673, 2083.4016)(380.1423, 125.83)(359.482, 4320.723)(361.1317, 2933.06)(378.47656, 3145.6624)(379.13956, 3358.2986)(380.1359, 479.25)(360.12976, 81027.64)(361.13553, 16824.188)(362.14233, 8865.979)(396.93423, 15346.921)(397.5978, 60552.3)(398.1711, 21817.635)(400.1826, 2959.3525)(379.16342, 6966.187)(379.15698, 34828.426)(380.16467, 6959.71)(381.2763, 1449.4221)(382.17117, 5395.7163)(400.12…	9.29452
CPD-13420	2034125	1435842	1644937	1206450	1357243	4058533	1904273	1362351	1	1790221	1463075	1	2522098	1456320	1476861	1550723	2005006	1649255	1939763	2039571	1553228	2595568	1136431	3728808	4427169	6419779	2303882	2303882	1776191	1968263	1600808	1	2972114	1	2630529	3521984	CPD-13420	CPD-13420 [ C18 H28 N O5, tgt=70.98, overall=70.98 ]			(338.6178, 11325.012)(339.33386, 3464.7205)(322.9926, 10359.9)(323.96506, 9519.924)(324.9261, 9445.172)(325.1998, 7745.84)(341.3472, 8179.1826)(341.78464, 8162.401)(342.21484, 10607.655)(323.0576, 9496.893)(323.9138, 6939.016)(324.36746, 8574.648)(325.2, 8950.87)(358.60568, 12388.814)(357.23132, 3746.2861)(358.2475, 1443.62)(341.5301, 15043.513)(361.89355, 27338.115)(363.19525, 7178.875)(343.4634…	19.0172
CPD-12385	15169886	10446393	1	6356796	139383	216100	1	1	7998801	4657633	4991519	313111	207959	1	155714	1	242444	9410762	1	407171	1	1	1	1	1	878499	601470	601470	811529	1	305679	1	390770	1	373399	1	CPD-12385	CPD-12385 [ C13 H17 N3 O4 S, tgt=57.70, overall=57.70 ]			(314.36624, 4170.9883)(314.9313, 1486.6582)(293.83487, 10452.934)(294.08633, 273.59332)(316.95074, 7913.548)(316.1029, 213.82)(299.39194, 4783.2397)(300.09616, 2086.91)(330.7272, 86351.29)(332.7299, 196601.62)(311.5932, 8699.465)(312.74384, 2857.3645)(314.36887, 8336.165)(335.2277, 4831.817)(336.83362, 581.0825)(338.58618, 236.37)(317.87784, 8339.13)(318.0687, 34.65)	14.0231
CPD-12384	1646621	2793868	5947552	4234693	1857194	1	4457684	4973068	4297630	6145277	2236986	2143965	5718248	2174064	982616	2875165	2598839	3285805	1890255	1339868	26117268	1442111	1091076	1442733	2290136	6881451	4011409	4011409	1683772	1385149	727970	2331746	5176161	1809796	2156310	5476687	CPD-12384	CPD-12384 [ C18 H23 N4 O7 S, tgt=65.61, overall=65.61 ]			(441.3915, 1251.81)(445.1298, 1488.69)(421.41528, 53464.22)(422.43155, 9317.523)(423.41284, 2197.2175)(424.1234, 593.47)(443.4721, 940.5544)(444.141, 36.15)(424.7423, 2361.2222)(426.29477, 1283.9701)(426.7991, 4971.2534)(427.1359, 29405.69)(459.3004, 3525.8936)(459.87872, 1445.9828)(439.76117, 13663.671)(440.58664, 2913.6338)(441.8671, 2288.8286)(464.07037, 3594.6074)(464.54932, 3708.8228)(465.36…	11.5791
CPD-12386	1	6798223	5407946	5755441	14043862	5388346	1	9230867	5276252	10959104	1	3749696	7453841	1	5219749	6039235	3376764	4474390	5377063	1	2039826	4879885	4028176	8322111	1705130	5554477	779785	779785	7887126	1100055	938660	653418	7371989	569380	1755966	9395671	CPD-12386	CPD-12386 [ C10H10N2O2, tgt= ]			(190.07146, 5460.802)(191.0782, 808.28)(173.06467, 9730.743)(173.06282, 903.99)(174.0598, 657.51)(193.15056, 21295.844)(194.53574, 4261.3945)(195.89561, 599.742)(196.0959, 240.5)(174.87654, 18000.676)(175.07426, 62012.945)(211.15977, 8182.127)(191.40286, 5553.3193)(213.58133, 178059.81)(215.02646, 19895.26)(215.6647, 12606.312)(217.0707, 483.01)(196.91588, 92636.016)	5.46822
CPD-12381	1	2912489	2860284	2541568	1	1858047	3832871	1914674	2773824	2173975	1	1544943	1	2780807	2652481	2006630	3092907	1	4680361	5277572	4306564	1	3938409	3077747	4092766	6555800	6036553	6036553	1	1	6027229	36138892	1	1	1	1	CPD-12381	CPD-12381 [ C10 H13 N5 O5, tgt=94.05, overall=94.05 ]			(270.0903, 565.98)(284.09827, 152198.7)(285.1026, 17053.205)(286.10312, 1167.47)(266.08817, 10996.421)(267.08844, 2316.99)(268.0937, 612.345)(304.77484, 6178.3267)(305.3837, 2581.53)(285.95364, 2734.7766)(287.28976, 2568.8196)(287.94583, 4834.812)(288.12247, 5364.4634)	18.3601
CPD-6994	1937972	2684762	1939644	1146137	6891852	2083631	6587354	1198279	4466978	1633834	10587353	1410725	1354607	6112043	7051967	1282323	1730840	1802645	2078442	2037130	4941834	3778632	2664498	2089247	2095181	1297162	3337510	3337510	1741700	1227125	1993614	8808627	33341452	1	3296356	14907196	CPD-6994	CPD-6994 [ C15 H11 O6, tgt=99.10, overall=99.10 ]			(287.05563, 171785.31)(288.0587, 28650.254)(289.06168, 3591.9768)(274.06113, 656.2028)(274.06247, 928.23)(307.96848, 1858.1709)(309.0222, 3366.8154)(309.4346, 2568.8167)(310.098, 313.61)(289.237, 4752.1514)(290.20947, 2152.573)(313.05264, 11744.499)(314.05557, 2012.1234)(315.0571, 881.79)(295.0468, 213.73)	14.1546
CPD-4617	106961648	81303648	80768640	82925840	82795384	105333616	97998384	76616888	90220360	80498120	76125432	114337168	119597088	99198328	88065752	99456896	100530144	105116944	1	1	1	15836071	1	1	1	1	1	1	1	1	1	1	1	1	1	1	CPD-4617	CPD-4617 [ C16 H25 N5 O6, tgt=99.32, overall=99.32 ]			(383.1763, 15700.802)(365.16763, 20541.268)(384.1875, 4041790.2)(385.19043, 707177.1)(386.19263, 139448.16)(387.1972, 18035.547)(366.17636, 384658.56)(367.1796, 159909.45)(368.1821, 31827.61)(403.43213, 11043.544)(405.22363, 5007.7915)(406.2234, 6950.64)(387.3684, 21109.668)(387.2125, 12402.0)(406.76788, 3377.15)(407.166, 417.21)(388.16064, 40110.273)	13.237
CPD-6995	2258098	2238732	2649775	1779963	1249167	9222049	4311513	1560450	1	1211094	1368137	1467360	1967749	1984205	1855332	5268648	1849785	5374307	2233076	2354251	2278017	2063045	1686311	1	1711463	1880418	1992995	1992995	3741465	1730497	2859678	1471301	3262905	1992718	2953559	3496338	CPD-6995	CPD-6995 [ C4 H10 O4, tgt=79.29, overall=79.29 ]			(123.838745, 12365.434)(106.04995, 2071.8132)(125.07069, 48339.516)(126.071465, 10197.3125)(108.359344, 26042.074)(110.06724, 3804.099)(143.32529, 17217.58)(144.17892, 211942.6)(145.10204, 33723.21)(125.50125, 21804.691)(126.0905, 7143.26)(148.72227, 36599.523)(149.18297, 27593.164)(127.1051, 49440.39)(128.43102, 1782.1454)(129.03532, 898.0257)	10.0327
CPD-4618	7030813	5482768	3918838	4901177	4250403	6137666	3124724	3747327	5118981	5988440	4435413	6446797	5901164	6123489	4846352	4863110	4899044	5607457	5423880	6197651	5862109	6371763	4703217	1	6088798	5363358	8388984	8388984	1	5033547	4431233	4267079	5424270	5473025	6632101	2969939	CPD-4618	CPD-4618 [ C16 H23 N5 O6, tgt=87.96, overall=87.96 ]			(381.71384, 1756.374)(382.97098, 9407.976)(363.56757, 8279.406)(366.7026, 70370.19)(367.91727, 34001.434)(368.1685, 14090.747)(382.27173, 2643.0583)(364.1613, 10269.454)(365.1566, 440.08)(399.45068, 4071.918)(383.04388, 7587.351)(386.2014, 15455.84)(404.15543, 235522.2)(405.1605, 48324.01)(406.16327, 9131.056)(407.1625, 847.1937)(390.2977, 27136.977)(391.15295, 34199.19)	12.4307
CPD-8168	137949088	1	1522218750	944329860	755642690	680136380	672680260	724974400	1349521280	52385368	3406163970	1	2286575620	1849276160	374953600	1555449220	533392928	761325180	494258848	777681410	1391241470	666306430	2744023810	103464488	2003629570	975854850	2472863490	2472863490	252963264	422076992	482780288	1	549718140	567940220	776875460	1	CPD-8168	CPD-8168 [ C45 H74 O10, tgt=99.81, overall=99.81 ]			(774.6843, 31871.096)(776.53577, 53369.867)(777.539, 19903.717)(778.53894, 1571187.6)(779.542, 750505.4)(780.5452, 255988.9)(761.07135, 48854.51)(758.52765, 23307.93)(775.53424, 122728.54)(776.5376, 65545.71)(777.543, 24931.889)(758.41785, 117332.914)(758.5236, 121955.805)(759.52625, 41525.906)(760.5267, 6799.37)(761.5155, 1474.01)(792.5629, 7132320.5)(793.5655, 3995997.5)(794.56976, 1561372.6)(7…	27.5458
CPD-12383	16971504	17756916	18791328	21836676	21116740	17307250	21906616	21522772	21491432	11448206	10824945	27350060	17849400	30257064	24233658	23195924	12562281	19847860	29492286	1	1	1663337	21795440	28532922	23179362	41185752	33726576	33726576	14236137	1256173	13859727	18927840	33567788	18154758	1	30056092	CPD-12383	CPD-12383 [ C8 H9 N O2, tgt=87.35, overall=87.35 ]			(155.07217, 4764.381)(135.86717, 8554.403)(136.9732, 8013.875)(152.07095, 627591.5)(153.07414, 57541.242)(154.077, 1527.3425)(134.06087, 11122.482)(135.05795, 869.81104)(169.09708, 14383.736)(153.09079, 846.95856)(178.5663, 7571.4)(156.0437, 112.13)	6.89794
CPD-4615	106961648	81303648	80768640	82925840	82795384	105333616	97998384	76616888	90220360	80498120	76125432	114337168	119597088	99198328	88065752	99456896	100530144	105116944	1	1	1	15836071	1	1	1	1	1	1	1	1	1	1	1	1	1	1	CPD-4615	CPD-4615 [ C16 H25 N5 O6, tgt=99.32, overall=99.32 ]			(383.1763, 15700.802)(365.16763, 20541.268)(384.1875, 4041790.2)(385.19043, 707177.1)(386.19263, 139448.16)(387.1972, 18035.547)(366.17636, 384658.56)(367.1796, 159909.45)(368.1821, 31827.61)(403.43213, 11043.544)(405.22363, 5007.7915)(406.2234, 6950.64)(387.3684, 21109.668)(387.2125, 12402.0)(406.76788, 3377.15)(407.166, 417.21)(388.16064, 40110.273)	13.237
CPD-8167	933061500	2259183360	2027479300	318938	3218880510	647233600	2710345980	2784890620	763383940	1	94313672	1	137323632	2024301950	614452	523457568	2199079170	679478	502649472	3207357700	627378240	634940800	170744496	312474144	976761410	1	259970608	259970608	1140524540	1034960060	113038952	1	99315096	196030784	222917632	1	CPD-8167	CPD-8167 [ C45 H76 O10, tgt=59.83, overall=59.83 ]			(776.9283, 150994.0)(778.6156, 146196.73)(780.69476, 1061434.4)(781.5588, 2373600.5)(781.8909, 1842263.0)(782.5659, 1409668.2)(759.36884, 35655.78)(759.5364, 36710.11)(777.5472, 27037.057)(759.5516, 108770.48)(795.2093, 1200555.4)(795.5781, 484651.16)(796.5827, 235421.75)(797.5893, 63934.984)(776.56775, 5752.308)(777.563, 605.10004)(799.6001, 276893.03)(800.5747, 123008.72)(801.7402, 56450.133)(8…	26.2114
CPD-6997	1	1	490413	1399474	1001093	2083883	1	954668	2562398	1	2308136	1333312	1338553	1	1	1	1	1144808	4208275	4949484	7289650	6217971	1	3249780	5436800	2522633	6048042	6048042	1	4288082	5219216	1764723	5501446	4043238	1	1	CPD-6997	CPD-6997 [ C15H12O6, tgt= ]			(288.05856, 2191.43)(271.25674, 720.04395)(271.06052, 174414.8)(272.06375, 29893.432)(273.06647, 4096.5635)(274.06485, 232.76332)(306.49786, 936.762)(288.5059, 5852.0996)(290.09387, 204.6)(293.1036, 1249.34)(315.13766, 1952.1359)(297.0571, 1239.84)	17.7701
CPD-4616	106961648	81303648	80768640	82925840	82795384	105333616	97998384	76616888	90220360	80498120	76125432	114337168	119597088	99198328	88065752	99456896	100530144	105116944	103357184	112824224	104970208	15836071	91789248	88294528	108745688	105127912	134454096	134454096	68867992	86903360	86733696	73806416	95527800	15608562	110129280	57099712	CPD-4616	CPD-4616 [ C16 H25 N5 O6, tgt=99.32, overall=99.32 ]			(383.17746, 14119.644)(365.20813, 37098.098)(384.1875, 3936049.8)(385.19058, 693103.2)(386.19247, 139651.9)(387.1973, 19864.746)(366.17645, 337142.75)(367.1798, 83080.04)(368.1821, 31827.61)(403.2775, 10572.727)(405.12314, 4985.7656)(405.55505, 5714.277)(387.67706, 25916.44)(387.2125, 12402.0)(406.94586, 3107.1624)(407.1586, 1155.145)(388.1608, 57203.48)(389.16248, 52125.117)(390.171, 23361.35)	12.6548
CPD-4613	7030813	5482768	3918838	4901177	4250403	6137666	3124724	3747327	5118981	5988440	4435413	6446797	5901164	6123489	4846352	4863110	4899044	5607457	5423880	6197651	5862109	6371763	4703217	4327296	6088798	5363358	8388984	8388984	3903306	5033547	4431233	4267079	5424270	5473025	6632101	2969939	CPD-4613	CPD-4613 [ C16 H23 N5 O6, tgt=87.96, overall=87.96 ]			(381.68243, 1735.5638)(382.97098, 9407.976)(363.68353, 7966.9175)(366.76352, 62320.508)(367.91727, 34001.434)(368.1685, 14090.747)(382.26266, 3131.4475)(383.1741, 2510.28)(364.207, 9818.522)(365.1566, 440.08)(399.75684, 3902.6663)(382.98535, 7218.6206)(385.6983, 19567.5)(404.1554, 228992.48)(405.16037, 47151.99)(406.16364, 8708.83)(407.1625, 847.1937)(390.09473, 25715.432)(391.15298, 30435.129)	12.2984
CPD-6991	902647	2111297	686545	2767051	1043214	9436845	346169	593717	7146823	558345	1439479	2414113	778156	1999010	718866	900037	2826008	3369701	2092549	1954340	1829706	3551551	3809429	2022912	814124	1150489	1623428	1623428	4912753	3310192	1665034	2372210	1175516	2838593	2064435	541457	CPD-6991	CPD-6991 [ C15 H11 O4, tgt=74.70, overall=74.70 ]			(259.07983, 1510.66)(239.31, 168.0925)(259.04816, 2853.1409)(260.01212, 1638.8365)(260.0836, 4365.95)(242.99586, 2521.6794)(243.0763, 1134.17)(274.04095, 1594.1)(276.10822, 2290.111)(256.69354, 188.012)(262.60812, 81833.62)(263.61093, 60318.188)(264.05695, 10629.646)	1.723
CPD-4614	7030813	5482768	3918838	4901177	4250403	6137666	3124724	3747327	5118981	5988440	4435413	6446797	5901164	6123489	4846352	4863110	4899044	5607457	5423880	6197651	5862109	6371763	4703217	1	6088798	5363358	8388984	8388984	1	5033547	4431233	4267079	5424270	5473025	6632101	2969939	CPD-4614	CPD-4614 [ C16 H23 N5 O6, tgt=87.96, overall=87.96 ]			(381.71384, 1756.374)(382.97098, 9407.976)(363.56757, 8279.406)(366.7026, 70370.19)(367.91727, 34001.434)(368.1685, 14090.747)(382.27173, 2643.0583)(364.1613, 10269.454)(365.1566, 440.08)(399.45068, 4071.918)(383.04388, 7587.351)(386.2014, 15455.84)(404.15543, 235522.2)(405.1605, 48324.01)(406.16327, 9131.056)(407.1625, 847.1937)(390.2977, 27136.977)(391.15295, 34199.19)	12.4307
CPD-4611	8628305	1	6002211	7128812	1	7770240	7301717	5992753	6679584	7320506	1	1	1	1	6879012	1	1	1	1	1	1	1	1	1	1	1	1	1	1	1	6850606	5917941	6401704	9493650	10241683	5921163	CPD-4611	CPD-4611 [ C16 H19 N5 O6, tgt=86.28, overall=86.28 ]			(378.9713, 1841.9066)(359.12192, 179.62428)(378.14395, 1034.6566)(379.1379, 2429.49)(360.1298, 147388.5)(361.13583, 29293.936)(362.14233, 8865.979)(396.7045, 26604.068)(397.39032, 93366.99)(398.1711, 21817.635)(400.1826, 2959.3525)(378.16135, 9615.923)(379.15698, 34828.426)(380.16467, 6959.71)(381.2763, 1449.4221)(382.17117, 5395.7163)(400.12424, 91451.414)(401.12802, 17611.518)(402.13272, 3204.9…	9.78825
CPD-6993	52057348	17788376	9936057	14332188	13232225	8644206	19392620	13905207	39789328	7706522	8656995	4441183	46373488	1	17516184	10171395	69101712	5388106	99943192	140604048	69153880	1	46815072	14717628	23230040	17498606	133714632	133714632	51125944	16256240	111766184	2966063	21388820	82930416	141423472	16811016	CPD-6993	CPD-6993 [ C15 H12 O4, tgt=98.84, overall=98.84 ]			(256.0735, 16462.975)(238.06337, 8137.66)(257.08157, 1314575.6)(258.08493, 224279.62)(259.09042, 36207.35)(260.0956, 992.175)(239.0706, 435998.75)(240.07442, 75091.47)(241.07959, 11742.732)(274.56598, 1586.8829)(275.77798, 475.37)(258.1063, 170.72)(265.06693, 274.45)	23.8723
CPD-4612	7030813	5482768	3918838	4901177	4250403	6137666	3124724	3747327	5118981	5988440	4435413	6446797	5901164	6123489	4846352	4863110	4899044	5607457	5423880	6197651	5862109	6371763	4703217	1	6088798	5363358	8388984	8388984	1	5033547	4431233	4267079	5424270	5473025	6632101	2969939	CPD-4612	CPD-4612 [ C16 H23 N5 O6, tgt=87.96, overall=87.96 ]			(381.71384, 1756.374)(382.97098, 9407.976)(363.56757, 8279.406)(366.7026, 70370.19)(367.91727, 34001.434)(368.1685, 14090.747)(382.27173, 2643.0583)(364.1613, 10269.454)(365.1566, 440.08)(399.45068, 4071.918)(383.04388, 7587.351)(386.2014, 15455.84)(404.15543, 235522.2)(405.1605, 48324.01)(406.16327, 9131.056)(407.1625, 847.1937)(390.2977, 27136.977)(391.15295, 34199.19)	12.4307
CPD-11281	1	194962	1	334483	1	381632	1	413410	1	1	129162	1	1	503910	382906	1	1	1	1	1	1	1	1	1	1	1	1	1	1	1	1	1	1	1	1	1	CPD-11281	CPD-11281 [ C10 H16 N3 O6 S2, tgt=52.22, overall=52.22 ]			(339.8059, 1487.105)(345.0489, 181.65)(323.84683, 49193.082)(324.0485, 50860.66)(357.41458, 2726.4768)(359.0823, 2019.75)(338.5755, 5780.525)(363.0303, 799.52)(348.0227, 516.27)	10.9711
CPD-4661	20858752	21996896	35671896	21219360	25678356	16556127	14465062	35783060	31234212	11253716	28789492	21717016	24533142	47136224	27930316	21594878	10461995	12141076	35902664	13097913	9206848	10779403	37081840	5363815	12699881	18227540	33554628	33554628	25038480	48787792	29396028	10198543	13177609	34698736	10041760	1	CPD-4661	CPD-4661 [ C15 H24 O2, tgt=85.80, overall=85.80 ]			(237.18156, 5533.949)(238.18301, 583.8521)(219.17067, 50919.145)(237.18477, 1886.085)(219.29372, 42423.26)(220.18062, 2846.5032)(221.18394, 401.88)(260.3724, 10034.384)(264.1832, 5932.725)(241.15628, 333811.3)(242.15921, 48439.75)(243.1503, 405.905)	2.65467
CPD-11287	5054503	8148908	5552203	2466848	5195191	2276886	4327380	3192591	6526761	7680446	4502833	3612855	8044289	2136953	4059673	3592792	3343583	3232966	3827209	4297223	5244071	6742087	5567680	6040744	7715362	6489556	5144790	5144790	4723536	4989211	2845016	2784263	6934768	7068156	11680768	3848735	CPD-11287	CPD-11287 [ C15 H24, tgt=99.59, overall=99.59 ]			(205.1953, 222601.1)(206.19841, 39264.14)(207.20212, 2387.3286)(222.22179, 1756.0905)(223.22415, 204.52)(227.1756, 16682.682)	26.6223
CPD-4664	5054503	8148908	5552203	2466848	5195191	2276886	4327380	3192591	6526761	7680446	4502833	3612855	8044289	2136953	4059673	3592792	3343583	3232966	3827209	4297223	5244071	6742087	5567680	6040744	7715362	6489556	5144790	5144790	4723536	4989211	2845016	2784263	6934768	7068156	11680768	3848735	CPD-4664	CPD-4664 [ C15 H24, tgt=99.59, overall=99.59 ]			(205.1953, 222601.1)(206.19841, 39264.14)(207.20212, 2387.3286)(222.22179, 1756.0905)(223.22415, 204.52)(227.1756, 16682.682)	26.6223
CPD-14516	853328	1210907	14642514	7772909	11192949	1956317	1329894	12656181	2135500	21559108	13224528	13704365	1	17228800	1110068	15262982	8285123	1021691	8205795	6139339	10776859	3304312	2304391	10241917	1343476	1	7933997	7933997	1792194	4346644	9606240	1	3896611	12139116	4957903	2602004	CPD-14516	CPD-14516 [ C8 H15 N O, tgt=73.68, overall=73.68 ]			(143.1199, 5033.6523)(125.1088, 5830.39)(142.12312, 62515.29)(143.12299, 12075.302)(124.11262, 20959.51)(125.10655, 7643.675)(168.11366, 3042.5999)(146.09386, 183982.48)(147.0958, 9648.748)(148.0979, 534.92)	6.72417
3-METHYLXANTHINE	13542638	11260058	11460156	15767716	20280062	13100771	13392432	19247672	12679359	10454174	8550299	15545346	18977116	12524491	16788770	13234545	9036040	11136242	1	1	1	1	1	1	1	1	1	1	1	1	11072008	1	1	1	6615908	1	3-METHYLXANTHINE	3-METHYLXANTHINE [ C6 H6 N4 O2, tgt=82.68, overall=82.68 ]			(168.15202, 2659.3354)(169.47182, 632.775)(170.05704, 779.20245)(169.72836, 139.58667)(188.09253, 15158.3955)(189.092, 198.67)(166.07294, 111795.836)(167.07645, 10541.878)(189.0397, 2957.7666)(190.0432, 1019.58)(174.40369, 2849.0654)(175.97171, 1113.2993)(176.0382, 208.51)	2.51078
CPD-3944	1	24923376	1	9468599	1	3124993	1	2863996	1	10206057	7373132	8272272	1	1	1	1	1	1	5573461	5875195	13743498	13944879	23514632	9782978	11990934	16524266	15962745	15962745	6262540	5624539	6791347	1	28323762	1	1	6994506	CPD-3944	CPD-3944 [ C17H14O6, tgt= ]			(314.079, 302887.38)(315.0832, 62260.9)(316.0859, 9464.306)(317.08792, 681.52716)(296.06836, 82722.32)(297.0722, 15639.068)(298.0759, 1942.3226)(299.08972, 367.845)(315.08694, 297920.94)(316.09003, 52166.684)(317.09348, 8024.351)(318.09793, 496.33804)(332.52557, 198059.77)(333.11383, 28728.7)(334.1156, 1667.3309)(317.48697, 583.85254)(337.46786, 1488.9374)(321.0591, 111.39)	20.9565
CPD-7496	1	1	1	946527	1	2229328	1	2354369	1	931083	1	1	1	2702845	1	1	1	1	727396	511077	1346529	877025	1	673709	1	1	605099	605099	520024	1	1	1	786031	1	1	1	CPD-7496	CPD-7496 [ C40H56, tgt= ]			(540.02716, 15342.909)(541.25397, 10324.627)(542.0577, 3703.0757)(540.1163, 28719.025)(540.95154, 14286.325)(542.4626, 2085.58)(556.9767, 1188.335)(559.8859, 8103.123)(560.42365, 2241.095)	28.8197
CPD-3942	808611	1	1	744146	1	1546332	716350	685665	1	1215341	1	1	1	647867	1	1	1	743788	1	2882251	4172109	3449990	4470469	1	3318446	1369342	4334110	4334110	1	2621040	1	1	1	1	1	1	CPD-3942	CPD-3942 [ C16 H12 O6, tgt=97.87, overall=97.87 ]			(300.0629, 921.88)(301.07123, 80693.31)(302.0744, 13529.548)(303.07654, 2022.8058)(283.0609, 882.8)(318.10052, 4026.214)(319.10284, 295.97336)(302.59518, 308.07498)	18.9777
CPD-3943	1	8759038	6092317	10231483	44651004	7192983	33594600	1	39591132	27730672	3055639	29909688	1	3445541	8801851	3505935	5179424	7089928	202259	1122962	1428428	22837736	13911572	3262069	68352184	55357100	39288080	39288080	38365808	41018004	826154	1	1	913656	1779241	4085599	CPD-3943	CPD-3943 [ C28H48O2, tgt= ]			(417.16592, 6095.713)(417.97012, 646.88196)(398.51953, 1634.2433)(399.3603, 931.49)(418.05487, 4942.566)(419.37457, 1508.0114)(399.36227, 86544.32)(400.3659, 27657.32)(401.3698, 5811.2153)(402.36435, 569.62)(437.4028, 538.55334)(416.6261, 1493.9171)(440.3551, 76450.664)(441.65442, 46593.434)(441.35617, 15721.118)(421.34564, 10145.462)(422.3485, 3259.3381)	27.8481
CPD-14533	1	1855456380	12010854	1612247810	1	1026264260	986678400	13802050	1730109310	1192142460	4768716	5786535	957549570	48060008	1	1430134530	1075835390	2102241660	347200608	1	358123104	797036350	979047810	1358400380	770078340	536886460	177405440	177405440	676960060	1151597700	32074892	1390374270	680155390	1	1	1	CPD-14533	CPD-14533 [ C36H54O4, tgt= ]			(553.05133, 23458.492)(556.08105, 11100.18)(535.4024, 20320.955)(535.3956, 4855.11)(537.4045, 8190.05)(556.18756, 20738.24)(556.7599, 11289.5)(557.4213, 21845.0)(536.8463, 12773.601)(538.1885, 5818.417)(539.21545, 5929.832)(569.43427, 284561.97)(570.4421, 123128.164)(571.4393, 11663.586)(572.44086, 3647.518)(551.4253, 3877357.8)(552.4284, 1740472.1)(553.4323, 377113.38)(554.4362, 70427.55)(555.81…	28.7075
M-TOPOLIN	964754	666800	713352	916760	1024829	1	1357408	925338	745681	991580	715624	1	1327874	994299	927251	962355	1414181	876363	1	1229469	1472480	1313450	583785	1198752	1147165	1227551	1444986	1444986	1	1315948	9518507	1321093	1423826	1574873	1462510	859428	M-TOPOLIN	M-TOPOLIN [ C12 H13 N5 O, tgt=68.59, overall=68.59 ]			(244.04417, 19279.621)(226.01431, 6946.902)(228.1092, 7279.86)(246.94264, 8835.993)(226.1073, 3286.626)(263.52454, 14814.446)(265.32236, 26741.799)(266.16003, 22363.564)(243.53395, 5374.1636)(244.138, 6082.35)(268.50754, 4503.356)(269.77615, 6534.933)(269.60886, 2194.815)(270.1094, 3360.0)(248.28629, 32241.604)(249.09538, 5430.0923)	11.0511
CPD-14529	1	150534432	110387496	105411048	78422416	93926096	81655480	86291976	103217824	65085464	58806864	55541332	1	1	1	1	104591216	44636496	1	1	1	1	1	1	1	1	1	1	1	1	1	1	1	1	1	1	CPD-14529	CPD-14529 [ C10H12O2, tgt= ]			(169.09758, 23450.924)(147.57918, 7213.4585)(148.07985, 2129.9402)(165.09161, 4456578.0)(166.09442, 527637.8)(167.09837, 53695.29)(147.44402, 11475.209)(148.0812, 981.55)(182.11855, 22184.873)(164.10716, 1514.0438)(187.07535, 18228.477)(188.0871, 2484.27)(170.99205, 4716.639)	20.5198
CPD-10707	5054503	8148908	5552203	2466848	5195191	2276886	4327380	3192591	6526761	7680446	4502833	3612855	8044289	2136953	4059673	3592792	3343583	3232966	3827209	4297223	5244071	6742087	5567680	6040744	7715362	6489556	5144790	5144790	4723536	4989211	2845016	2784263	6934768	7068156	11680768	3848735	CPD-10707	CPD-10707 [ C15 H24, tgt=99.59, overall=99.59 ]			(205.1953, 222601.1)(206.19841, 39264.14)(207.20212, 2387.3286)(222.22179, 1756.0905)(223.22415, 204.52)(227.1756, 16682.682)	26.6223
CPD-10708	5054503	8148908	5552203	2466848	5195191	2276886	4327380	3192591	6526761	7680446	4502833	3612855	8044289	2136953	4059673	3592792	3343583	3232966	3827209	4297223	5244071	6742087	5567680	6040744	7715362	6489556	5144790	5144790	4723536	4989211	2845016	2784263	6934768	7068156	11680768	3848735	CPD-10708	CPD-10708 [ C15 H24, tgt=99.59, overall=99.59 ]			(205.1953, 222601.1)(206.19841, 39264.14)(207.20212, 2387.3286)(222.22179, 1756.0905)(223.22415, 204.52)(227.1756, 16682.682)	26.6223
CPD-3141	262636	400983	254552	3614846	2243785	2441683	3433118	1056078	658290	2984162	487052	237550	1282865	1	263765	397900	1059629	487977	1	2234471	1	728493	1	4614232	6808508	9155084	2897784	2897784	1926803	5871374	1689463	6398484	8730016	3234951	3458808	3845960	CPD-3141	CPD-3141 [ C15 H9 O5, tgt=73.64, overall=73.64 ]			(251.46107, 90545.98)(252.03392, 10017.247)(253.02931, 20843.447)(254.03174, 1445.7689)(271.1417, 940.7325)(255.76598, 2916.6821)(256.92883, 950.10254)(257.05438, 377.08502)(289.08466, 8055.4717)(288.08554, 1615.2001)(274.0803, 961.4375)(294.0379, 3598.0876)(277.03262, 20488.877)(278.03683, 2153.8257)	2.97072
CPD-14502	9839911	7097569	5272510	12220805	1	7861081	10949141	7272972	7606632	8248838	1	11608440	7873671	9739021	8871834	7532155	1	6020369	1	11618708	1	1	8173225	2522217	1	15378371	1	1	1	1	5723735	1	1	1	6050731	1	CPD-14502	CPD-14502 [ C26 H40 O8, tgt=92.60, overall=92.60 ]			(482.73514, 3499.6172)(481.2787, 6389.69)(466.35526, 51428.082)(466.77213, 30161.092)(486.04214, 1365.9059)(487.29422, 1641.7933)(467.50955, 146943.94)(467.78244, 86534.87)(468.53705, 23895.574)(469.29102, 5998.6167)(499.55692, 1968.88)(501.98483, 1315.3467)(503.3222, 188.62)(485.144, 873.785)(504.36514, 262798.28)(505.53183, 65773.12)(506.38593, 22485.775)(507.36816, 2938.092)(508.9446, 440.3933…	14.4076
CPD-14503	1	5304888	1	4798811	1	4828669	5677755	1	4094879	1	1	1	5150166	5048362	4137768	4680194	1	5027724	2254381	1	1	1	2228090	1	2062417	2052576	1	1	1	3104964	1	1	3517292	1	1	1	CPD-14503	CPD-14503 [ C32H50O13, tgt= ]			(644.57916, 7435.854)(645.42786, 3323.314)(646.83154, 1995.7025)(626.8227, 2909.2148)(628.3192, 2361.31)(629.3313, 81.5)(645.5901, 4502.3975)(645.66516, 2719.76)(647.8397, 1949.9401)(647.3358, 1474.61)(627.33167, 2135.1677)(628.33325, 1559.2762)(629.0015, 1659.4365)(629.3362, 832.88)(630.3437, 4239.55)(660.36273, 5822.623)(661.37006, 2482.564)(662.3572, 535.8)(642.91296, 20018.16)(643.4232, 7794.…	20.6461
ADENINE-RING	15232169	9438174	10607885	39428132	17425184	318935744	6896611	14995765	15367995	46032840	3624812	3531654	10956046	697868	9876276	1489162	10843295	188275	19405628	25788324	17475716	26951574	24458304	9394095	15812353	6362352	19502182	19502182	10392346	7998283	14966915	6462087	6335913	23822374	24745556	9159414	ADENINE-RING	ADENINE-RING [ C5 H5 N5, tgt=99.29, overall=99.29 ]			(135.0544, 1903.6663)(136.0616, 387060.1)(137.06366, 25556.959)(138.06514, 2405.9153)(155.20166, 19945.957)(158.89104, 262.42923)	4
18-HYDROXYOLEATE	3398565	2467526	2783515	909175	3619201	3444730	2521794	3462773	1168168	4053507	1	821604	6767630	3645878	2689793	2175697	1959129	3091419	3352285	527820	3298331	1967714	1	1	1929913	1	4496988	4496988	1	1	1	11730048	3462999	1	3344286	4434305	18-HYDROXYOLEATE	18-HYDROXYOLEATE [ C18 H33 O3, tgt=99.20, overall=99.20 ]			(297.24234, 12257.25)(298.242, 764.3657)(279.23215, 117150.336)(280.2354, 22211.39)(281.2389, 2186.0012)(282.2316, 215.19331)(303.26672, 721.5633)(283.41733, 3959.8552)(285.2558, 6607.1567)(315.70282, 10758.187)(317.8538, 2920.9587)(298.35532, 28546.002)(299.14908, 8507.669)(324.18262, 2486.7957)(303.22803, 43259.66)	25.8367
23-DIPHOSPHOGLYCERATE	421389	351988	389392	442539	478131	574518	335395	432565	366360	659016	330831	494504	267765	179559	207960	250221	154651	306004	300667	216481	197284	167589	247947	227614	164789	207794	162045	162045	290407	273501	208005	1	190538	272154	238489	275541	23-DIPHOSPHOGLYCERATE	23-DIPHOSPHOGLYCERATE [ C3 H3 O10 P2, tgt=47.42, overall=47.42 ]			(263.9273, 1696.568)(261.92847, 10877.261)(262.93173, 266.26288)(246.92702, 751.3125)(283.56598, 443.70996)(260.9438, 726.15)(287.80768, 388.79)(265.8951, 168.96)	1.404
L-ARGININO-SUCCINATE	1	1	1018796	3433737	14068974	1399159	4782546	769455	1	6122970	992587	1840921	1	1	1180490	1	8812244	6881022	1	1110807	1176793	33336508	4755668	1128715	19070948	908791	25062994	25062994	744498	19870308	619332	482188	1	991737	1069258	730132	L-ARGININO-SUCCINATE	L-ARGININO-SUCCINATE [ C10H17N4O6, tgt= ]			(290.91922, 2549.0154)(292.00867, 4359.0645)(293.1209, 677.19)(273.72824, 23458.592)(275.6503, 10362.054)(276.1133, 9028.87)(292.37698, 20574.424)(291.1289, 4426.4)(292.1213, 2447.83)(273.1141, 5886.0503)(273.74045, 2227.7336)(274.1109, 93.44)(308.67218, 18723.23)(309.80246, 3676.7957)(311.66046, 945.325)(312.158, 1581.19)(290.29697, 3176.9973)(293.14478, 5520.84)(294.1467, 268.65)(314.9122, 4568…	6.65861
CPD-11293	98693216	126039000	29669228	51524144	85063856	77754784	74698832	52115724	35822428	92578776	114080328	48586352	1	83523240	57234340	63919040	99576952	37425132	8329708	120118560	16592393	174617760	196793136	121523312	4694974	143350976	7646098	7646098	169037872	157243184	7722854	85677440	6120288	1	12911315	4657333	CPD-11293	CPD-11293 [ C15 H25 O7 P2, tgt=68.98, overall=68.98 ]			(379.73206, 1708.8938)(361.0925, 2737304.0)(362.09576, 553885.2)(363.09824, 108912.164)(364.10098, 12608.504)(380.3603, 2413.4062)(382.12183, 1341.8057)(363.77493, 12355.707)(364.10928, 2583.8118)(401.1487, 3458.1946)(379.93146, 766.52997)(404.46332, 1312.636)(405.21255, 5776.0396)(406.10843, 1110.3972)(386.12378, 1641.6646)(387.18628, 6670.821)(388.0971, 1292.7963)	18.0884
CPD-14510	5054503	8148908	5552203	2466848	5195191	2276886	4327380	3192591	6526761	7680446	4502833	3612855	8044289	2136953	4059673	3592792	3343583	3232966	3827209	4297223	5244071	6742087	5567680	6040744	7715362	6489556	5144790	5144790	4723536	4989211	2845016	2784263	6934768	7068156	11680768	3848735	CPD-14510	CPD-14510 [ C15 H24, tgt=99.59, overall=99.59 ]			(205.1953, 222601.1)(206.19841, 39264.14)(207.20212, 2387.3286)(222.22179, 1756.0905)(223.22415, 204.52)(227.1756, 16682.682)	26.6223
CPD-14511	8616735	7078657	5847959	1566500	637232	7217725	4190494	3134249	784800	3987929	5045813	3684091	1174133	469616	3715619	792956	6005629	7587482	8121809	8366957	4786820	11900486	954914	1483837	5026858	4435964	5293775	5293775	4048093	3940893	8165989	8055418	9729753	7839214	10403879	1	CPD-14511	CPD-14511 [ C8 H18 N O, tgt=69.13, overall=69.13 ]			(144.1383, 34195.39)(145.13707, 5721.124)(126.12776, 2674.6494)(127.1221, 2233.925)(129.14, 513.2)(146.36649, 69133.5)(147.67065, 5295.93)(167.91655, 10692.31)(168.13965, 777.05505)(149.56696, 106132.055)(150.11725, 20685.016)(151.11678, 4992.418)	9.768
CPD-14512	1	1261830	3247156	8304109	3893459	2114980	1459149	2892134	2275309	2911021	508104	1589205	1	2762166	1	1265321	780093	1079013	2704998	1	1	3571254	2522981	10813308	1	1	1	1	1901964	4616182	2098833	1	4085258	1375151	1	2824037	CPD-14512	CPD-14512 [ C8H16NO, tgt= ]			(142.12248, 108246.92)(143.123, 11541.112)(124.11213, 38766.86)(125.10655, 7643.675)(169.12395, 9292.209)(150.11267, 13465.56)(151.11224, 11334.476)	11.5224
CPD-14505	1	5304888	2776846	4798811	2148404	4828669	5677755	1541976	4094879	1	2068645	3919317	5150166	5048362	4137768	4680194	1	5027724	2254381	1960083	828161	2865138	2228090	2377886	2062417	2052576	1774898	1774898	1	3104964	1147069	1	3517292	1059911	1509474	1867574	CPD-14505	CPD-14505 [ C32H50O13, tgt= ]			(644.23883, 5239.867)(645.1161, 3606.5564)(646.6672, 2230.9236)(625.31726, 20362.021)(626.0956, 11784.074)(629.8282, 2754.97)(645.6099, 3119.4617)(646.76746, 1703.8057)(648.0108, 2226.3933)(647.3358, 1474.61)(626.94116, 3077.8298)(628.0594, 7181.5454)(628.77765, 4205.1733)(629.332, 2338.536)(630.333, 4936.41)(631.331, 2241.74)(660.84894, 6795.2017)(661.59125, 2273.92)(662.3572, 535.8)(643.2562, 1…	20.569
CPD-15390	2702729	3576541	769968	1396468	2333679	2136386	2023520	1474566	1	2561009	3263669	1354894	1851787	2397550	1545654	1	2846321	1	7089619	3528870	7156805	5506716	6698566	3587720	5502056	4262217	7876023	7876023	5255669	4699175	4423159	2419963	5666231	3463858	7644555	4155105	CPD-15390	CPD-15390 [ C10 H12 N5 O7 P, tgt=75.31, overall=75.31 ]			(331.0452, 10536.387)(332.0489, 1836.8499)(346.06906, 6407.612)(347.0732, 1187.8917)	18.9232
CPD-14504	1306991	2708761	1	1923099	452765	1548322	823042	1355878	567357	1103810	797803	1168558	2417275	949414	744830	623310	870666	770009	1	1851715	1459006	5446464	1082985	349739	548863	544635	2394162	2394162	650208	232016	1625828	1	1	867743	1228041	1	CPD-14504	CPD-14504 [ C38 H60 O18, tgt=93.07, overall=93.07 ]			(804.3758, 7261.0137)(805.3809, 3413.4941)(806.38257, 1236.0388)(807.3807, 130.22)(788.1232, 2203.1345)(788.1029, 2804.4006)(791.38086, 1401.9199)(806.3779, 23576.93)(807.3825, 9406.97)(808.387, 3217.98)(788.7489, 3010.7974)(826.4278, 2214.07)(826.4247, 4021.37)(807.4069, 464.2667)(806.407, 2902.05)(807.4016, 1466.62)(808.4158, 3306.3)(809.4137, 813.81)(810.4211, 4067.82)(829.13855, 1127.5156)(83…	20.6315
CPD-15391	32017572	50759896	7854645	15737627	1162467	22217954	20070506	15120495	1	50705500	38799880	16246433	24044440	27415102	21936584	26845824	27925240	11123248	47246480	33180102	50755072	51855632	55026532	1	41938172	1	46150508	46150508	1	1	1	1	44226608	27014988	1874529	1	CPD-15391	CPD-15391 [ C10 H12 N5 O6 P, tgt=83.40, overall=83.40 ]			(315.0504, 130789.8)(316.0537, 21047.152)(313.05298, 4499.44)(314.0562, 1009.96)(349.0911, 5064.15)(350.0943, 867.02)(330.10986, 64066.145)(331.15356, 15336.812)(332.56378, 1884.5973)(334.0904, 178.3)(338.0357, 563.495)	19.5571
CPD-14506	398318	333005	380759	111416	169179	254074	162514	158543	355802	170839	117787	204722	1	1	1	1	1	1	356903	199650	158034	858010	159218	1	1	1	92661	92661	190225	1	1	1	1	207473	161410	1	CPD-14506	CPD-14506 [ C44 H70 O23, tgt=51.89, overall=51.89 ]			(967.30286, 1906.6525)(968.43353, 1003.0666)(950.9808, 2414.2366)(952.0518, 1702.8462)(952.1885, 1430.8975)(951.4468, 1053.26)(953.04407, 299.176)(955.434, 377.8475)(986.96625, 413.64)(988.37274, 577.037)(989.36664, 411.7633)(989.6458, 439.20004)(990.645, 420.255)(990.8103, 477.7667)(991.47876, 405.76)(966.456, 662.7137)(967.45483, 240.1275)(993.5101, 2288.1646)(995.7714, 3875.8318)(996.4383, 641…	11.531
CPD-15393	1874006	1382932	1893479	2093904	2180238	1537953	1545485	1525561	1647517	1867758	2048947	2048312	1611383	1548597	1757346	1414522	1396306	1782713	2442500	1589359	1422699	1651052	2294614	1434848	2254462	2497813	1763255	1763255	1188154	1801653	658169	1421066	2422683	1958737	369475	1676354	CPD-15393	CPD-15393 [ C9 H11 N2 O8 P, tgt=32.09, overall=32.09 ]			(306.91443, 1633.5857)(289.204, 2207.1606)(292.0219, 853.61)(308.91473, 389.2525)(293.65186, 3542.1338)(329.0749, 1306.71)(309.0586, 7320.987)(310.88214, 763.1047)(332.4223, 1581.8811)(333.0242, 182.62)	1.43206
CPD-14508	9839911	7097569	5272510	12220805	7365926	7861081	10949141	7272972	7606632	8248838	8908294	11608440	7873671	9739021	8871834	7532155	1	6020369	7742283	11618708	6839316	14659101	8173225	2522217	8273104	15378371	1	1	1	6866315	5723735	5562635	1	1	6050731	9183152	CPD-14508	CPD-14508 [ C26 H40 O8, tgt=92.60, overall=92.60 ]			(482.77994, 4884.1875)(482.6057, 5023.517)(466.66135, 44845.39)(466.64648, 29406.045)(468.2772, 236.83)(485.7914, 1469.6794)(487.29422, 1641.7933)(467.33398, 146910.94)(467.53226, 170910.38)(468.2864, 52193.562)(469.09015, 11331.623)(469.2916, 7954.89)(499.1644, 2189.9456)(501.81854, 5386.4297)(502.82245, 2935.84)(483.70547, 1642.516)(483.80676, 3714.335)(484.3101, 2437.15)(504.43796, 228522.33)(…	13.6407
S-HYDROXYMETHYLGLUTATHIONE	4652024	3967520	5168360	3351638	3617087	3342707	2940272	3003028	99658656	1775422	4916682	5818587	3555339	3375617	1866931	3039503	3345561	59322832	1395904	2885602	778490	1767780	798765	3285917	1174918	634311	1318351	1318351	1131028	1302430	715464	498187	1	1	695990	1	S-HYDROXYMETHYLGLUTATHIONE	S-HYDROXYMETHYLGLUTATHIONE [ C11 H18 N3 O7 S, tgt=72.09, overall=72.09 ]			(340.6923, 5986.698)(321.0766, 993.33)(341.09656, 3234.729)(342.09784, 15896.721)(323.37277, 24941.082)(320.0854, 8011.69)(321.0883, 1102.52)(354.7042, 16009.84)(355.45514, 3573.932)(356.1239, 535.21625)(336.11057, 88524.875)(337.1158, 14235.074)(338.12012, 17564.3)(359.0771, 426588.34)(360.0811, 197344.3)(361.08606, 122865.984)(362.09085, 17086.176)(343.5672, 9648.615)(342.0696, 3416.25)(343.063…	22.27
5-METHYL-THF	10554175	3902906	6888767	7404257	7857026	3683239	9946067	6668077	10793087	5094986	5825519	5198401	3708948	9147630	8418987	8806000	7602045	4608287	13122212	13923881	55788072	12415835	9883325	42449164	8601184	22845530	12751468	12751468	8945609	9876485	7505418	40183464	11890661	10287343	14207161	23089516	5-METHYL-THF	5-METHYL-THF [ C20 H23 N7 O6, tgt=72.04, overall=72.04 ]			(458.58124, 28533.05)(460.85095, 20343.475)(461.98755, 11016.382)(439.27682, 25431.482)(440.1613, 9107.549)(459.9185, 79861.23)(460.94876, 65774.97)(461.68704, 18575.523)(462.62064, 4386.4253)(463.1883, 1170.99)(441.17334, 133221.12)(442.1765, 31367.023)(443.54474, 9589.338)(444.6754, 380.32498)(445.1863, 2224.43)(475.47626, 121008.97)(476.28302, 34646.414)(477.2079, 5642.0845)(459.80463, 27154.6…	14.1499
CPD-10734	2074915	2796032	1941429	2226867	2636599	2286937	2613233	2921851	2110193	3385098	3016213	1824844	1942961	1607526	3092864	1742931	3130722	2353862	1889596	2128902	1949735	2647337	3117982	2833169	3137184	2194280	2619376	2619376	2087883	2484959	1669462	1180224	1	1994347	2548337	3344804	CPD-10734	CPD-10734 [ C9 H15 O9, tgt=95.69, overall=95.69 ]			(267.12378, 9425.517)(269.0772, 29416.49)(270.08, 3237.63)(249.06107, 81413.04)(250.06494, 7968.4595)(251.06638, 347.38303)(269.082, 1737.5945)(270.0872, 259.13)(255.0844, 9971.99)(286.07596, 13637.884)(286.1038, 2532.69)(269.3331, 2394.5574)(269.26648, 1323.7317)(293.06927, 756.0814)(275.05594, 10986.985)(276.34763, 392.0843)	17.5483
CPD0-1386	5827070	2769957	4740642	764427	11334169	9954937	755119	639411	1759617	427092	9082998	6241357	1587199	1684397	767044	640614	444355	514696	10288436	560124	1230299	1	10442183	700896	951563	615471	1547606	1547606	8652020	1	1126505	12361032	1096641	1	1	715181	CPD0-1386	CPD0-1386 [ C4 H8 N2 O3 S, tgt=58.96, overall=58.96 ]			(146.01259, 19998.625)(147.02364, 1619.3018)(170.0354, 713.21)(185.55803, 1696.785)(186.55884, 1976.39)(167.82806, 1890.9777)(169.05014, 270.10498)	20.4793
CPD-11230	9225080	24235928	6343666	7727786	6533314	10287428	8957368	8751638	10543404	9866089	7585282	9643918	71524624	12167309	20595188	11321765	5509092	148179344	10715997	11351505	11112030	64848796	9293601	7253809	5347406	5434705	12184327	12184327	6905398	8489793	7302105	7988411	11480430	1	11600064	1	CPD-11230	CPD-11230 [ C21 H18 N3 O3, tgt=58.18, overall=58.18 ]			(360.13077, 178218.52)(361.14142, 63066.61)(362.14502, 12968.6455)(363.148, 1072.42)(344.46362, 5881.0317)(345.35712, 2925.0698)(346.705, 3161.6384)(364.90158, 337.80002)(344.95682, 1562.6973)(345.47177, 1788.0732)(347.1427, 6878.44)(380.04895, 4709.4517)(380.34225, 823.11835)(362.4684, 2047.0148)(363.83228, 1694.2384)(364.1646, 4189.19)(386.25275, 1431.0925)(386.63135, 1085.1849)(388.1363, 162.4…	10.0667
CPD0-1392	1	1	1	307529	113178	1	197125	172959	1	126412	234848	201838	1	445394	1	1	1	1	1	1	1	1	1	1	1	1	1	1	1	1	1	1	1	1	1	1	CPD0-1392	CPD0-1392 [ Cl2 H6 N2 Pt, tgt= ]			(306.94934, 1980.7063)(308.9531, 360.28)(297.9596, 655.3)(313.98883, 2755.2542)(315.9881, 239.89)(323.94003, 13666.647)(325.93826, 3672.3118)(327.94324, 339.34998)	1.18567
CPD-11233	4821728	2826096	3073959	3163770	3214899	4433600	4245369	2618972	3443198	7289121	3959643	3754712	1567028	3345254	3672269	2406596	3622520	3372598	4732073	10679226	3839179	5006377	5488687	3901539	4555698	10312344	5359563	5359563	5235957	9779224	3986294	2747285	5526876	5836861	4928925	4121583	CPD-11233	CPD-11233 [ C17 H26 N O4, tgt=94.08, overall=94.08 ]			(308.18594, 14950.774)(292.33075, 22423.074)(294.1838, 29863.6)(295.1849, 8304.99)(310.57794, 7545.683)(312.55872, 27971.443)(312.2055, 35898.03)(293.16013, 134820.52)(294.16238, 26055.74)(295.24237, 7302.3843)(296.1993, 1770.54)(326.3066, 22971.76)(327.22797, 6079.649)(310.67853, 8125.8184)(335.188, 556.83)(316.86993, 27035.586)(316.17548, 1112.61)(317.1802, 32150.45)	20.9239
ORCINOL-CPD	35347728	29254290	19058614	17700264	12426596	15549528	14332104	13874007	17206446	7582593	8461872	7735026	24382552	10178176	21833692	8022052	17837336	6660060	25736492	25245232	24206700	20654194	17656944	1	18006444	13437467	22884450	22884450	13180930	8634175	2385028	1	4280465	19535534	19081504	3739274	ORCINOL-CPD	ORCINOL-CPD [ C7 H8 O2, tgt=87.86, overall=87.86 ]			(124.7597, 662877.1)(111.05652, 1387.8955)(128.36177, 18358.32)(107.04886, 69501.14)(108.052895, 5714.35)(109.054405, 159.88333)(142.22836, 7618.335)(124.07541, 6977.7544)(147.04358, 10013.217)(130.03494, 3658.312)	16.6433
CPD-11235	9725544	6980850	6452775	7333624	8654403	7502674	12722446	8503115	1	40697748	8940601	8852919	6295372	1	7103832	8228622	9959515	8080296	8002250	7381309	59717992	9427057	6717483	4060940	1	51411464	10103434	10103434	1	43076500	36522736	5612003	43599612	5590555	52087768	5492617	CPD-11235	CPD-11235 [ C21 H26 N O4, tgt=75.01, overall=75.01 ]			(358.52576, 27465.346)(358.1905, 71598.56)(359.1918, 11263.686)(360.1973, 1843.54)(339.81848, 16264.084)(340.64902, 14977.876)(341.18228, 4338.1064)(343.1874, 453.52)(359.91583, 42451.44)(359.63068, 13248.607)(360.20084, 3513.6748)(361.71017, 3401.3235)(362.2116, 6146.61)(340.0194, 12267.142)(340.35403, 4129.9253)(376.7469, 14303.986)(377.225, 18505.396)(356.36807, 278574.8)(357.21054, 62614.906)…	16.266
QUERCETIN-33-BISSULFATE	1	108697	1	608915	1	1	375179	346664	1	109900	634916	380560	1	1316544	90881	1	1	1	1	1	1	1	1	1	1	1	1	1	1	1	1	1	1	1	1	1	QUERCETIN-33-BISSULFATE	QUERCETIN-33-BISSULFATE [ C15 H7 O13 S2, tgt= ]			(443.91882, 674.16003)(460.80307, 2512.1897)(461.9455, 570.28)(478.46405, 1013.39)(464.94995, 2429.8699)(483.9165, 2930.2)(485.9164, 1105.32)(468.91248, 3812.0425)(469.91406, 2541.7354)	1.19556
S-METHYLGLUTATHIONE	30757428	1	3202705	2146042	2222408	16651790	2213883	2324072	2376563	3428590	47885180	59011456	2326355	8053002	1277302	2509128	1995336	2337841	5613381	1	716174	11999666	788940	14596330	14340416	458559	22185200	22185200	3904274	621500	9082024	683299	514280	816950	1	2648819	S-METHYLGLUTATHIONE	S-METHYLGLUTATHIONE [ C11 H18 N3 O6 S, tgt=69.07, overall=69.07 ]			(323.60876, 50292.72)(325.0961, 16760.525)(326.09247, 14401.775)(304.58356, 610.66003)(321.76416, 13444.25)(322.1007, 9366.76)(305.2895, 11339.056)(304.09015, 2629.476)(339.04062, 11881.004)(339.32526, 5358.018)(341.1277, 3869.4849)(323.7174, 4933.04)(344.91046, 504875.8)(344.08527, 149934.0)(345.09106, 93390.51)(346.09607, 12523.205)(329.84186, 2247.6313)(329.0682, 14500.85)(330.074, 2967.39)	17.9608
LUTEOLIN-7-O-BETA-D-DIGLUCURONIDE	158958	323078	187592	806065	245298	135587	224746	239463	1	294259	257306	248218	1	1	1	1	1	1	1	1	1	1	1	1	1	1	1	1	1	1	1	1	1	1	1	1	LUTEOLIN-7-O-BETA-D-DIGLUCURONIDE	LUTEOLIN-7-O-BETA-D-DIGLUCURONIDE [ C27 H24 O18, tgt=69.28, overall=69.28 ]			(659.0757, 473.0)(644.08307, 29367.043)(645.08716, 6033.32)(646.0835, 5338.775)(647.08704, 728.35)	1.454
CPD0-1397	4615601	7691336	2934309	832625	5960214	4249412	1	3297418	1140123	1	8610588	9752471	4003129	6228831	2712693	4672264	4455851	2538960	1	3230849	2931052	5865543	3968559	4404661	1	3556734	1892109	1892109	3521133	2872939	5414781	1072034	1576006	4211017	1330749	4415651	CPD0-1397	CPD0-1397 [ C6 H16 N8, tgt=64.95, overall=64.95 ]			(201.60213, 25374.354)(203.40945, 123777.69)(205.159, 41500.246)(206.16127, 358.67667)(221.18837, 4271.0005)(222.19078, 455.65)(225.46515, 18649.438)(226.864, 3622.8062)	21.0893
CPD-11227	1	3423435	11479737	8028380	1093675	1	10579024	2290796	6504604	3837348	1	4800562	8131163	2873086	10532058	4855756	4481475	2495520	6642844	7257822	2276718	60705544	8760766	3569636	3275415	2459398	3145880	3145880	1	1	1	1973133	3635845	4052599	3277000	1	CPD-11227	CPD-11227 [ C16H19N2O3, tgt= ]			(288.93088, 11294.507)(288.14127, 1508.0)(270.16766, 26309.639)(272.13773, 5603.652)(271.88483, 1118.9775)(290.81973, 5207.228)(292.6593, 9508.795)(293.1607, 1733.2)(272.21402, 9442.106)(274.14447, 1852.39)(307.97226, 8024.1636)(308.40585, 5118.8477)(308.9333, 842.04504)(310.186, 1932.95)(290.79648, 19008.914)(291.2502, 29711.004)(310.60373, 8371.218)(312.13516, 15360.026)(314.1422, 2786.94)(292.…	11.5839
CPD-11226	3168918	14931104	6731520	2878783	12229848	2240529	3644177	2869117	3760705	11483412	3391755	2653395	4693470	21249504	3349775	2119073	2990095	1858443	7433007	4859957	2075601	3849338	4905657	2001167	3081732	3507979	4158252	4158252	1	15230110	10693139	7236900	2660593	3790463	6579260	2563065	CPD-11226	CPD-11226 [ C12 H11 N2 O3, tgt=65.40, overall=65.40 ]			(232.89839, 475.2336)(233.0801, 5797.59)(214.10257, 115747.17)(214.20787, 28711.777)(215.06541, 21454.371)(216.0633, 542.45)(234.59251, 695.17755)(233.0776, 187.87)(216.7348, 6927.073)(218.08505, 7543.4434)(249.15086, 2809.2917)(250.51794, 702.33704)(231.97888, 109579.98)(232.15276, 28328.7)(233.09772, 7857.173)(258.66284, 2351.9417)	9.34458
CPD0-1398	18681208	7514383	7643791	4378889	5884880	4138848	4483017	3728660	17414872	6275970	10042538	1	13720258	14158559	3957381	9184568	3989238	13668988	1867719	1879622	4437226	3703891	3489438	6026918	4926150	4950146	2381042	2381042	4522241	4985629	2210880	1570914	2728582	4878952	1685187	4350471	CPD0-1398	CPD0-1398 [ C5 H14 N8, tgt=81.69, overall=81.69 ]			(186.1318, 49383.62)(190.14409, 1343357.5)(191.14732, 138833.02)(208.1681, 376.03)(211.81113, 7050.9263)(212.86873, 23997.994)(213.75092, 52891.82)(214.125, 79331.55)	24.0353
CPD-11229	1966581	1741953	8260463	61604832	1	1	1	13513545	159402480	1	1	1868231	2175745	5103514	1406474	1544354	1836884	1390700	1610946	2677531	2628570	3209790	1	1970813	1	1	1	1	3484011	4054078	2187333	1	1	2007543	1	1725436	CPD-11229	CPD-11229 [ C19 H17 N2 O4, tgt=62.72, overall=62.72 ]			(338.11917, 9304.1)(339.1271, 2910.755)(320.7432, 6105.108)(321.28174, 2301.5732)(339.23758, 7253.351)(339.46384, 2302.5134)(322.4218, 5519.817)(323.12833, 36091.26)(356.86398, 10036.6875)(358.16034, 2628.9067)(359.1641, 1639.705)(360.16214, 1077.79)(338.47906, 48936.67)(338.1472, 25660.238)(361.47812, 4928.9336)(361.60748, 1048.395)(345.6613, 16865.846)(347.1108, 175029.28)	20.7639
CPD-11228	1	2671335	2066217	2716141	1	522966	1	1	671983	3626967	2557048	1952143	1	2658764	2297873	2609259	1	1	3506115	1363165	1353338	3253985	832016	2551978	3268569	1	1452987	1452987	611909	1	2280267	1	3610839	1275030	2102757	508134	CPD-11228	CPD-11228 [ C15H17N2O3S, tgt= ]			(307.18826, 1231.0745)(307.76007, 730.31)(289.5039, 32667.127)(290.73984, 17865.607)(291.00867, 4787.031)(293.0871, 1775.27)(308.73264, 892.00684)(293.099, 3795.25)(324.39813, 36527.207)(324.7627, 10624.068)(326.1259, 1866.032)(307.16687, 4054.1895)(308.4331, 2134.0693)(310.3952, 11508.124)(310.873, 508.125)(311.1198, 658.51)(330.45865, 6611.7334)(332.75787, 4410.5464)(334.09018, 1391.2928)(313.9…	10.5343
CPD0-1393	1	1	1	150603	1	1	128134	137049	1	1	188858	152334	1	698296	1	1	1	1	1	1	1	1	1	1	125025	155729	1	1	1	201137	1	516320	163730	136670	1	115897	CPD0-1393	CPD0-1393 [ C9 H10 N5 O11 P2, tgt= ]			(428.99207, 1215.6725)(409.17786, 2527.3247)(411.64725, 748.88995)(409.9722, 574.06)(430.0032, 2149.0566)(410.9871, 5355.305)(411.98914, 918.77)(447.0314, 720.175)(428.61163, 778.196)(448.9725, 8551.643)(449.97287, 2690.6892)(433.9734, 640.265)(434.9678, 386.71)	1.27278
CPD0-1394	286699	747130	356577	415944	373803	391974	392923	464329	427849	744454	509126	695818	410768	1033956	514334	788822	334753	810497	717571	712798	710309	202634	386785	1185941	1249371	1624085	682885	682885	523913	735932	536807	1141667	1980965	900966	813854	1083385	CPD0-1394	CPD0-1394 [ C9 H10 Cl N2 O11 P2, tgt=46.97, overall=46.97 ]			(423.6168, 858.14996)(400.93448, 849.10004)(420.3452, 1348.101)(424.95853, 972.63666)(425.9647, 411.27)(404.9438, 1193.1708)(406.74393, 691.98596)(407.27725, 1776.6533)(408.44702, 1179.33)(421.82245, 1566.0358)(422.52133, 847.20557)(422.96484, 1812.2233)(442.9397, 1358.83)(423.9253, 2221.0144)(424.9264, 586.44995)	1.27944
CPD0-1396	11700717	8271049	8632856	1856643	14480707	19817716	5879178	12063260	9513682	6585991	8041372	1917204	9084020	4882409	8478728	6434060	8652742	7063452	31147256	39736756	28099032	42445616	35921432	14757815	23323660	10128051	30249236	30249236	1840535	22563438	1505852	9777558	4626513	32256880	34551540	12740611	CPD0-1396	CPD0-1396 [ C12 H18 N5 O3 S, tgt=93.94, overall=93.94 ]			(312.112, 133931.67)(313.11475, 17674.396)(314.11115, 7196.4053)(315.12, 177.33)(294.1335, 114134.21)(295.10437, 15704.17)(296.11456, 1420.4393)(297.10907, 149.79001)(315.4129, 1901.5918)(316.62122, 1568.4877)(318.04572, 1671.7098)(319.1266, 3587.11)(297.3289, 3240.856)(300.00626, 1989.8542)(300.8387, 3227.2334)(301.11166, 4550.9067)(334.81766, 866.13995)(335.1541, 1515.53)(316.58426, 3089.8545)(…	6.33919
CPD-13495	1	1697232	1	1915512	2356535	1	2449218	1824743	770624	2140083	20904544	2382979	3093288	1955089	1963625	1653482	2874543	9507512	5880803	6540430	10623336	11405353	9610264	1420384	7371629	1	10154450	10154450	7758028	8047478	5397178	6105944	7840681	4800087	1275394	4811191	CPD-13495	CPD-13495 [ C16H24O4, tgt= ]			(280.84622, 128093.02)(282.8109, 150397.36)(284.18057, 37237.81)(264.1612, 41922.996)(265.5775, 15393.074)(267.17242, 27992.725)(282.64127, 17063.785)(283.17953, 19141.512)(265.74448, 22584.557)(299.20157, 9679.0)(301.2132, 60964.97)(280.31973, 6939.444)(281.1846, 850.3)(282.1876, 254.6)(306.51828, 9673.5625)(308.16846, 3056.0278)(285.24146, 26087.115)(286.14532, 1133.6162)	16.3356
CPD-13498	2929482	3267724	2713507	6128707	3001466	3171491	3035795	2742738	3009235	3903304	3511180	4517609	3697208	2847215	2634415	2945871	2522262	2668795	3781103	517247	438748	3197468	4136107	2871176	2281923	674131	2567344	2567344	3687212	4116259	3805199	2923223	2812449	3736606	2298079	4133088	CPD-13498	CPD-13498 [ C19 H29 N5 O10 S2, tgt=71.94, overall=71.94 ]			(536.43225, 537.95996)(539.119, 516.6)(556.14764, 6010.1875)(557.14996, 1779.7158)(569.1693, 9681.753)(570.1741, 1390.0634)(571.1807, 86.47)(553.1552, 56610.08)(554.1592, 15239.837)(555.22986, 3772.9849)(556.2642, 1328.0823)(575.1355, 6151.88)(560.1098, 136.27)	12.4757
D-TRYPTOPHAN	33673096	81581744	39817520	56235840	38603204	41536684	51270668	39343252	39954984	96309032	64501464	77557008	24434094	139439536	31845416	41734208	38684088	84966672	89913504	133145696	91321744	52990172	45931632	143644576	126506936	143799248	87848592	87848592	59758708	60573808	49963720	99359504	159140368	83507424	107637024	79179480	D-TRYPTOPHAN	D-TRYPTOPHAN [ C11 H12 N2 O2, tgt=97.80, overall=97.80 ]			(208.01625, 5458.9224)(209.1028, 6608.533)(188.96027, 7333.2373)(191.0907, 9020.165)(205.09793, 2140462.0)(206.10101, 248957.64)(207.10344, 32222.041)(192.10204, 2005.9331)(224.12926, 54258.406)(226.1361, 641.1817)(206.31815, 6280.772)(227.08029, 57322.75)(228.08461, 8208.447)(229.09442, 581.26135)(210.94722, 1510.6042)(214.08203, 546.5175)	6.69217
CPD-6901	6693962	22228696	865453	1177213	28206504	7856436	1785040	1334658	1021567	18700508	1759681	2010657	7496581	3889391	1430705	4872748	7736793	9187413	1089351	5001203	2728560	1	37867784	3652658	1703359	4886123	1	1	8789127	4782842	2126127	3753440	4631651	1	2573142	1478773	CPD-6901	CPD-6901 [ C12 H17 N O3, tgt=95.84, overall=95.84 ]			(224.45824, 3798.6152)(208.11769, 556.7767)(224.52936, 22914.396)(225.13246, 5710.028)(226.1301, 693.96)(206.92009, 1254.174)(241.15535, 246152.12)(242.15811, 37335.906)(243.15053, 506.34668)(225.27457, 5667.122)(226.67398, 2306.0098)(227.15512, 1263.2499)(247.75029, 1430.9618)(249.6192, 1668.315)(251.1264, 333.54)(229.74545, 5534.013)(232.63911, 2394.0154)	1.86028
PROTOPORPHYRINOGEN	11299893	6987023	9621467	8131414	10583118	8738075	12800413	12320987	1	9686594	1	14326380	18179632	4128870	8560596	9153958	12087929	1	10936961	58907256	17343800	1	36611252	10942940	7069290	6591630	23851128	23851128	12726570	9417530	19178812	4170728	10566621	26747864	19788492	4176365	PROTOPORPHYRINOGEN	PROTOPORPHYRINOGEN [ C34 H38 N4 O4, tgt=67.07, overall=67.07 ]			(569.3058, 10902.12)(549.98035, 460762.7)(550.9844, 162271.23)(552.37225, 46423.06)(553.36346, 9488.381)(554.1529, 2257.6372)(571.7542, 5417.094)(568.3016, 13115.39)(569.3196, 1977.01)(549.2871, 46924.07)(550.2835, 25704.83)(586.3255, 1785.0806)(587.7572, 1734.3885)(588.734, 3838.65)(589.83746, 3041.285)(590.3367, 1457.425)(566.83154, 22059.541)(568.1097, 8726.416)(569.4608, 2711.0093)(571.32794,…	21.9585
CPD-11260	1	1	2424092	3974969	2621043	1	1	1	1	2961033	8662639	7970580	1	1	1	1	1	1	1	1	9481499	1	1	3321078	14663704	7485876	1	1	4125794	2524024	1	1	1	1	1	8068361	CPD-11260	CPD-11260 [ C12 H17 O4, tgt=85.58, overall=85.58 ]			(207.1018, 150774.84)(208.1057, 20846.139)(209.11028, 2094.42)(226.49945, 103775.33)(227.12749, 25995.838)(209.11166, 4509.1987)(210.61488, 1526.85)(244.68886, 73050.82)(245.6914, 226947.34)(246.15208, 352663.16)(226.13817, 12962.773)(250.1104, 177.53)(232.09871, 5278.7085)(233.27972, 15991.6875)(235.1018, 156.36)	19.4074
CPD0-889	6623157	1	1739826	6626129	6063022	5642406	1016283	4819310	5173888	9505168	9198186	5755143	6669126	5452104	386480	5548821	1	5343441	14337371	8315522	23532924	1	18373316	13961209	18695112	14538480	1	1	5839734	20754208	12258842	7680048	28804200	12218146	19071132	13346125	CPD0-889	CPD0-889 [ C12 H12 N2 O5, tgt=73.56, overall=73.56 ]			(269.0827, 771.35)(249.0735, 260.01)(266.08502, 12069.222)(267.08682, 1518.9346)(248.27657, 233.798)(284.9159, 1891.7932)(284.6108, 294.37)(285.1168, 929.3)(268.20087, 365.7218)(267.1052, 3721.57)(290.06934, 2225.46)(271.06055, 24711.201)(272.0636, 8591.37)(273.0661, 751.43)	12.9408
CPD-20277	56814268	7886041	38644232	49876416	47824360	47509032	37741132	28304710	17664784	64635228	70978520	65188956	20526776	17479498	24191030	15517510	106240336	76376424	3841259	5909906	13237917	1	3608672	1	4484152	4819369	3234619	3234619	6225444	12482350	1	4277855	1	19508804	16104501	1	CPD-20277	CPD-20277 [ C8 H15 N O3, tgt=55.75, overall=55.75 ]			(175.11113, 9584.944)(157.09755, 1167929.9)(158.10068, 30177.03)(174.11208, 9067.52)(156.10165, 110325.35)(194.89978, 6225.567)(195.14969, 3474.53)(196.28914, 8768.365)(197.0946, 876.26337)(178.85521, 113520.88)(180.31746, 17493.014)(181.08412, 3638.7974)	22.2825
CPD-13494	1	1	5482325	1913997	1239148	6457171	2658749	1589211	1433598	1062460	1653897	1043974	1835172	1713875	1338359	2873084	6394888	4212169	3003564	1669959	1	3468596	2457432	2486300	1539502	4422360	3275222	3275222	1	2236698	3922262	1	2192573	2376844	4427492	1	CPD-13494	CPD-13494 [ C17H26O4, tgt= ]			(296.28815, 11820.423)(298.03888, 23031.76)(298.19122, 21151.58)(277.9081, 44092.812)(279.1808, 29843.557)(280.741, 14416.326)(281.1867, 15663.197)(297.39804, 13564.064)(296.2025, 1926.5449)(277.84827, 50830.773)(315.225, 7414.857)(316.23074, 570.455)(295.3156, 21559.643)(295.41025, 6035.578)(296.54666, 411.87)(321.9546, 6428.96)(322.187, 34117.703)(299.37497, 40278.906)(301.16803, 8819.299)(302.…	21.3622
PREPHENATE	1991799	199551	151294	156187	518486	1	1	1	1	347263	183799	1	211036	1	1	126180	89447	196528	337182	347227	1109896	293378	303613	163218	1	216027	341130	341130	246046	125728	309779	196109	1	280848	360792	214527	PREPHENATE	PREPHENATE [ C10 H8 O6, tgt=62.31, overall=62.31 ]			(226.03522, 3019.155)(225.02386, 661.36)(225.37169, 8996.34)(226.04094, 1464.9241)(227.03532, 614.74756)(209.5381, 1363.4475)(244.4567, 5670.094)(244.45941, 1541.9115)(246.0756, 168.35)(247.077, 1784.98)(225.05957, 2888.9958)(225.0603, 2646.72)(251.36475, 79977.9)(252.03438, 6598.8926)	11.8676
INDOLE_ACETATE_AUXIN	1181044	2594567	729437	212505	461454	3339793	873928	2282398	6485996	684234	414900	2226655	2590724	1036844	1148754	306529	1	2629973	746331	19259848	708454	3118680	364688	889332	706597	875408	1719328	1719328	1	487622	398757	1111424	441333	405440	1096320	599443	INDOLE_ACETATE_AUXIN	INDOLE_ACETATE_AUXIN [ C10 H8 N O2, tgt=56.59, overall=56.59 ]			(175.1178, 7559.6)(158.66887, 10918.4)(159.25522, 6327.105)(177.6203, 30396.0)(179.3591, 5916.125)(179.40723, 171.27998)(159.23863, 3006.419)(194.09323, 3538.3005)(193.09027, 187.04)(194.084, 84.18)(174.50287, 19445.787)(175.07857, 8062.886)(176.07225, 2716.6)(199.44217, 2610.7617)(200.72191, 7158.9155)(180.1084, 15576.984)(180.03926, 1771.324)	8.66531
CPD-10758	5054503	8148908	5552203	2466848	5195191	2276886	4327380	3192591	6526761	7680446	4502833	3612855	8044289	2136953	4059673	3592792	3343583	3232966	3827209	4297223	5244071	6742087	5567680	6040744	7715362	6489556	5144790	5144790	4723536	4989211	2845016	2784263	6934768	7068156	11680768	3848735	CPD-10758	CPD-10758 [ C15 H24, tgt=99.59, overall=99.59 ]			(205.1953, 222601.1)(206.19841, 39264.14)(207.20212, 2387.3286)(222.22179, 1756.0905)(223.22415, 204.52)(227.1756, 16682.682)	26.6223
CPD0-1367	2250415	2416062	2783069	2104601	2836062	1456681	2506541	1634336	3056229	1686275	1890974	1184036	3280685	1848807	2583596	2389146	2424079	1181526	4778521	3784109	3917493	3495434	3600153	2655265	3946982	2973031	3879778	3879778	1	2485659	2707836	2307134	3579319	2436000	3429289	3558337	CPD0-1367	CPD0-1367 [ C16 H16 O2, tgt=78.38, overall=78.38 ]			(240.89087, 3216.8076)(242.1172, 403.6)(223.6063, 464.385)(241.1216, 11403.681)(223.67691, 841.4863)(224.10545, 600.14825)(259.3545, 11393.159)(259.14728, 3072.2173)(240.82607, 131406.89)(242.5585, 64953.05)(265.30524, 12972.347)(266.19247, 3536.853)(265.61655, 1613.6174)	21.2592
AMINO-ETCETERA-PYRIDIN-1-YL-PROPANOATE	1539020	1	1686326	1860390	1187919	1018304	1004646	622973	2070023	842584	1874594	1244579	985434	1990269	1082516	1753159	1869164	1518971	1714364	1962782	2075079	1657336	1386468	1444761	1311351	1144429	1779008	1779008	859389	1	1083911	685234	2234763	1187090	1876672	1908391	AMINO-ETCETERA-PYRIDIN-1-YL-PROPANOATE	AMINO-ETCETERA-PYRIDIN-1-YL-PROPANOATE [ C8 H9 N2 O4, tgt=87.41, overall=87.41 ]			(201.97913, 8907.44)(181.04996, 20886.58)(182.0531, 1448.2518)(201.07135, 6990.8535)(183.88718, 13279.709)(215.08945, 7200.3315)(216.0965, 1467.17)(197.08195, 10851.292)(198.08487, 1459.969)(199.07806, 1743.3834)(205.0442, 510.74)	14.7808
CPD0-1370	443493	394024	335462	374672	353870	384380	425345	325453	382798	384593	1	371450	418647	400397	341640	318636	414773	366642	601642	603591	644986	641637	556765	362269	509640	532359	728554	728554	1	329409	528775	429235	645556	478093	1	1	CPD0-1370	CPD0-1370 [ C7 H10 O9 P, tgt=37.96, overall=37.96 ]			(252.99783, 10963.357)(252.00473, 544.23395)(269.03137, 5715.6924)	20.9268
CPD-11253	7870405	6888039	2424092	3974969	2621043	1	3605170	4268076	10800136	2961033	8662639	7970580	2840150	17548400	5129871	5872761	6855761	11863633	14810476	1634135	9481499	12473071	9761607	3321078	14663704	7485876	1	1	4125794	2524024	3466743	1444212	1	1510316	2220012	8068361	CPD-11253	CPD-11253 [ C12 H17 O4, tgt=98.87, overall=98.87 ]			(228.1218, 5188.545)(207.1018, 167248.88)(208.10565, 23148.836)(209.10948, 3204.5142)(226.55318, 98360.266)(227.12743, 26835.607)(210.17749, 6537.5454)(210.61488, 1526.85)(244.39948, 55279.67)(245.48662, 184954.47)(246.15207, 324875.97)(226.13821, 10457.781)(226.1429, 6933.14)(250.1104, 177.53)(232.0352, 5355.51)(233.1432, 14988.741)(234.09955, 7762.47)	19.6383
20A-20B-DIHYDROXY-CHOLESTEROL	31875724	19933228	9827889	10227138	27357664	41251412	3350322	28578008	6250993	1	16763953	10453858	24888562	14281749	26263032	23826774	1	15527126	9053878	5452395	3996181	6540142	3062331	2955192	1785723	7006829	17169094	17169094	5832904	2285165	1	8624510	4266820	7899279	19892220	1	20A-20B-DIHYDROXY-CHOLESTEROL	20A-20B-DIHYDROXY-CHOLESTEROL [ C27 H46 O3, tgt=67.39, overall=67.39 ]			(418.5247, 5399.972)(421.15292, 6362.5615)(421.34814, 8202.595)(401.57224, 3166.527)(403.63214, 2553.1726)(405.6021, 2492.4102)(406.35376, 1333.005)(419.6838, 34720.746)(420.6984, 10950.01)(423.35925, 11062.455)(402.43152, 5325.771)(403.04318, 2923.648)(404.69254, 5329.3667)(438.9733, 5758.9097)(440.05347, 1352.6566)(442.4018, 2993.68)(420.09525, 4025.7537)(422.1319, 1702.8049)(443.54178, 16560.4…	28.8369
CPD-20261	2567516	10771915	806592	3043919	2220966	3273216	2892870	2061612	8109006	4935432	6188109	2544389	2819094	6307517	6763369	4798929	2813046	2525504	1	1	1	1	1	1	1	1	1	1	1	1	3656360	1783455	12818215	2190468	5061173	6297604	CPD-20261	CPD-20261 [ C12 H14 N2 O6 S, tgt=74.99, overall=74.99 ]			(299.05536, 11463.523)(300.05914, 1745.0238)(333.09213, 699.52)(334.0907, 1079.0868)(314.0789, 248322.88)(315.083, 49355.984)(316.0855, 7123.881)(317.0881, 770.86786)(339.0503, 2648.06)	22.4048
CPD-20262	2567516	10771915	806592	3043919	2220966	3273216	2892870	2061612	8109006	4935432	6188109	2544389	2819094	6307517	6763369	4798929	2813046	2525504	2265400	3266955	4542723	4708296	9380301	2856767	3922223	2128832	5806822	5806822	3072854	2425478	3656360	1783455	12818215	2190468	5061173	6297604	CPD-20262	CPD-20262 [ C12 H14 N2 O6 S, tgt=74.99, overall=74.99 ]			(299.0554, 10975.608)(300.0591, 1663.37)(333.0923, 827.4949)(334.08963, 714.10004)(314.07898, 238963.44)(315.08316, 48760.098)(316.0858, 7267.2397)(317.08817, 648.03284)(339.0503, 2648.06)	22.4206
CPD-20264	1	292643	295490	506061	1548367	4469318	231712	162120	208197	3574210	1859293	1454205	1661395	278244	152470	213086	221215	228345	271972	319574	510688	192353	9597881	258219	390925	313226	380691	380691	1	4490056	339366	492168	469325	746863	388395	229936	CPD-20264	CPD-20264 [ C12H11N2O5S, tgt= ]			(296.0369, 263.66)(283.0341, 2344.58)(296.38126, 1961.5382)(298.04993, 1719.75)(300.0441, 427.84)(278.03674, 3715.18)(313.78638, 4568.555)(314.49197, 1325.6832)(295.2683, 10962.532)(296.1121, 2028.8661)(297.07306, 263.88998)(301.0248, 104.45)	13.5136
CPD0-1373	443493	394024	335462	374672	353870	384380	425345	325453	382798	384593	1	371450	418647	400397	341640	318636	414773	366642	601642	603591	644986	641637	556765	362269	509640	532359	728554	728554	1	329409	528775	429235	645556	478093	1	1	CPD0-1373	CPD0-1373 [ C7 H10 O9 P, tgt=37.96, overall=37.96 ]			(252.99783, 10963.357)(252.00473, 544.23395)(269.03137, 5715.6924)	20.9268
CPD0-1375	34805872	102850648	121148032	126411688	24544672	10189740	93959976	69188768	28288944	117948120	20397676	19261806	108233744	21695328	28681388	18728940	26389068	17776800	26854900	88181496	121326664	140532640	23299986	59814536	22681136	19577392	26068422	26068422	1	70688832	66663760	35638032	97528960	20518408	21023428	11310461	CPD0-1375	CPD0-1375 [ C18 H33 N7 O3 S, tgt=67.89, overall=67.89 ]			(427.4432, 5673.6187)(428.2456, 1524.74)(413.93082, 5656.3916)(414.9003, 1607.2534)(430.0099, 7386.5786)(429.24506, 960.5631)(411.26578, 18504.607)(412.37708, 5009.6963)(415.03818, 2013.5697)(416.2439, 1009.71)(448.66843, 7038.897)(451.27087, 10660.35)(430.06107, 9531.722)(431.37985, 51029.17)(432.46832, 60464.73)(433.1384, 25502.89)(433.26245, 21035.07)(450.37378, 37133.137)(453.23785, 3468.53)(…	12.9923
CPD0-1376	1086768	952841	1135133	1103608	1000757	1006745	1155059	989236	975915	1196407	933786	1082425	1122989	1356173	1118732	1021369	831289	972239	920383	947459	949423	1157537	830653	943611	920245	989523	986723	986723	604381	600537	713688	915953	971674	708330	977232	908733	CPD0-1376	CPD0-1376 [ C12 H24 N, tgt=87.33, overall=87.33 ]			(182.19061, 30692.205)(183.19362, 3870.9888)(209.1906, 148.94)	12.8434
CPD0-1473	788758	382489	285156	329810	705330	637836	543169	310623	208532	1142646	1234111	347543	727399	843425	706200	765987	730408	302661	1089033	158902	1641231	1707494	401438	1328956	322794	225961	183735	183735	424932	388556	351239	1	291117	303991	1217924	356179	CPD0-1473	CPD0-1473 [ C29 H29 N9 O12, tgt=65.80, overall=65.80 ]			(695.1942, 8689.208)(696.19684, 3513.4612)(679.1781, 69109.92)(680.1812, 26559.469)(681.1836, 6552.632)(682.1858, 697.8025)(684.2079, 200.68)(714.225, 13188.127)(715.2314, 4501.5376)(716.2391, 1369.5883)(697.2131, 1798.27)(698.2168, 314.6)(719.37805, 1262.897)(720.1821, 560.97)	18.3209
CPD0-1471	2067064	2464351	4184671	6368556	5592742	2619395	2395308	3095418	6255565	4547333	3921415	238556	489933	549381	2291366	2593585	1	4471776	1033178	594984	746264	2877683	11619677	1096557	1096083	5546481	3218369	3218369	6253851	894164	2899305	7651309	7418968	1	1764808	1543526	CPD0-1471	CPD0-1471 [ C7 H5 N5 O2, tgt=50.28, overall=50.28 ]			(193.0499, 673.54)(175.03893, 248.91667)(195.05515, 191.67)(178.80241, 24154.865)(209.80946, 106713.414)(210.48512, 15543.824)(211.07912, 313.65)(193.41826, 2927.3264)(192.9633, 392.2189)	13.8776
2-FLUOROBENZOATE	815143	658231	428829	803248	1036450	1	1	621457	446106	195134	1	694536	345626	1	502878	696154	274142	380738	1090834	603865	818417	414483	721705	1	783204	869279	913682	913682	596011	992814	1182390	772652	1051870	514711	820354	486249	2-FLUOROBENZOATE	2-FLUOROBENZOATE [ C7 H4 F O2, tgt=59.93, overall=59.93 ]			(141.09839, 8509.928)(142.36597, 378.49)(125.02354, 89.915)(160.05899, 3532.79)(140.80661, 6060.898)	6.59057
CPD0-1474	9799994	2109848	1	6821022	5351976	7489210	8698613	1978024	12284063	1	6623493	8346964	1401550	8577113	1391414	8421030	1612590	9190493	2043320	17696308	1	5077381	4743150	4461899	5451773	5098461	19761476	19761476	4390936	4419170	3800535	3194714	4418027	4787408	5323547	1	CPD0-1474	CPD0-1474 [ C25 H29 N8 O9, tgt=77.16, overall=77.16 ]			(587.2095, 11392.065)(588.5501, 4797.8506)(588.54675, 2809.8633)(589.7146, 988.05505)(567.67816, 19772.428)(568.81885, 27604.771)(570.5039, 14297.416)(572.7146, 1912.4751)(587.3788, 31559.486)(588.38135, 11777.149)(589.42, 2696.936)(590.2229, 749.96)(568.70746, 17497.938)(570.20056, 1484.5774)(571.7144, 2159.2202)(572.97034, 2392.5)(604.7139, 4018.7954)(607.25226, 12114.432)(607.7545, 13014.564)(…	17.1034
CPD-825	2271565	101698024	1255178	49375908	1	3296770	1052325	2209147	2142606	1106495	1145061	3333187	34381240	1872701	2177153	1864423	1724960	72827568	3397174	2540370	3702624	32053062	31304736	3427396	4036775	4198763	3061990	3061990	33385436	2959121	3352472	2632060	5662012	3796125	3013308	2236026	CPD-825	CPD-825 [ C5 H12 N3 O, tgt=86.51, overall=86.51 ]			(130.61263, 162097.62)(132.10197, 23954.582)(112.17278, 155686.08)(113.08987, 9335.549)(133.10815, 313773.03)(133.1093, 43060.81)(134.1111, 3238.66)(116.50232, 9961.471)(150.46823, 8150.6387)(130.15054, 12778.105)(155.23529, 144900.39)(157.64326, 139398.97)(158.0968, 36739.19)(138.28372, 9968.447)	4.47244
GERANIAL	31444436	41568736	31389912	30427456	38649496	10776552	33685584	28344458	32386588	53596284	55506036	20804214	33555688	29340476	21378312	20115840	34321184	11725678	31166184	40241648	53738864	59139256	37229964	19826704	41870672	48708688	51874116	51874116	46425392	34664992	26570344	26280052	71543888	36286612	49369892	32907188	GERANIAL	GERANIAL [ C10 H16 O, tgt=91.54, overall=91.54 ]			(154.12483, 11956.93)(139.1244, 142.53)(153.15997, 1220010.6)(154.12962, 149294.3)(155.13017, 9183.854)(135.6186, 381115.25)(136.1198, 52192.83)(170.15399, 2556.7354)(171.149, 347.95)(152.14348, 6782.1284)(175.17583, 100200.49)(176.36177, 36255.99)(177.1132, 2557.33)(157.09752, 806019.6)(158.10043, 45354.92)(159.09494, 27907.375)	11.5464
CPD-15332	2146003	6566400	2556638	1999768	2863138	1976508	5503626	4455185	2237755	3449774	5257770	707260	1	8721308	2839608	3002757	305645	1883519	599133	1247286	592124	266496	713877	317322	2138758	547660	372714	372714	555881	5606627	1426702	136919	2144937	2135560	1015297	1909671	CPD-15332	CPD-15332 [ C5 H4 N4 O3, tgt=75.40, overall=75.40 ]			(170.03004, 890.7337)(171.0318, 247.23)(170.37164, 183.20833)(155.0342, 1117.74)(187.17897, 59399.184)(189.47023, 2817.7703)(190.0707, 4506.15)(168.19388, 13059.887)(169.18932, 3283.3174)(170.0484, 3012.61)(192.0178, 6047.44)(192.0122, 6684.69)(174.50885, 544.79)	2.34803
CPD-17604	39857184	11303794	7382572	11971416	10565567	7801632	15423740	12278449	32101896	5285116	6212807	8546366	36927496	8370168	14181557	8946272	53121964	4653714	76600216	104529040	54433364	145390496	38779628	1	19081286	13606824	98693592	98693592	1	13234742	82860656	2271811	9888700	52976660	104501120	1	CPD-17604	CPD-17604 [ C17 H16 O2, tgt=86.31, overall=86.31 ]			(253.11862, 8725.899)(255.58836, 1066.5885)(253.45557, 12454.637)(254.1133, 297.98)(235.11195, 55438.914)(236.11644, 10716.128)(237.12494, 4162.955)(273.16037, 37532.375)(253.10747, 7915.449)(275.77448, 2095.465)(277.10825, 4938.0557)	23.8749
CPD-17601	39891552	40560924	44140888	40842464	4402728	40059796	6567647	6747094	8730083	7021272	3340266	38801876	5318650	42289936	41253756	3993965	3862909	4433534	9227971	10216554	9975362	4165519	11383124	10679178	10731133	9937693	11876347	11876347	3101851	11731630	10006819	1	5897748	3925662	10947253	5415451	CPD-17601	CPD-17601 [ C21 H24 O6, tgt=62.55, overall=62.55 ]			(375.66458, 9768.996)(376.4698, 2332.653)(377.17072, 1859.3)(356.79037, 3787.3516)(358.65863, 7308.8975)(359.16055, 5802.23)(376.86877, 46008.617)(378.12186, 14044.517)(358.34235, 3930.714)(359.43173, 2334.1475)(359.96616, 2794.484)(392.19748, 16802.844)(393.58832, 18128.473)(394.5206, 30416.963)(395.10114, 32267.375)(395.2009, 40811.25)(374.38898, 11172.673)(374.1903, 5912.78)(397.90332, 25922.1…	12.2751
CPD-9677	4518686	4187039	17573708	2650753	3065096	1637147	4725786	5451282	5899642	5430215	3878437	3939176	1821668	6185931	2439163	2892681	5228936	1611871	3807411	4200226	3610651	3492228	21373268	18919324	23114560	23186830	34133584	34133584	2640345	21518500	20986080	24543968	24682800	22030050	12798511	14203428	CPD-9677	CPD-9677 [ C29 H34 O12, tgt=99.12, overall=99.12 ]			(577.3606, 55295.188)(577.2138, 31678.4)(579.05133, 4450.3984)(579.5511, 3072.8435)(580.2175, 960.55)(556.4226, 17045.742)(558.1997, 299637.97)(559.2029, 77221.41)(560.2069, 18865.979)(561.7105, 1832.5701)(562.208, 247.47)(576.1485, 37209.84)(577.215, 36619.62)(578.2224, 8408.54)(580.2188, 1724.94)(557.3852, 93775.11)(560.2146, 18958.22)(561.2177, 12247.63)(562.2155, 22924.21)(563.2187, 11347.9)(…	19.5531
CPD-9676	1	1	1	296215	93171	1	193628	142740	1	1	1	1	1031254	445889	1	1	1	1	1	1	1	1	1	1	1	1	1	1	1	1	1603637	1	1	1	1	1	CPD-9676	CPD-9676 [ C8 H13 Cl3 O6, tgt=47.62, overall=47.62 ]			(309.9787, 1412.75)(295.96243, 564.52)(296.9614, 673.54)(311.9906, 6256.038)(313.98895, 3010.8738)(292.9752, 348.71)(334.00964, 1980.692)(336.0096, 281.61)(339.30188, 2050.1736)(342.96744, 5435.5996)(323.9601, 866.24)	10.2629
XANTHOSINE	8693317	19424500	1	6104239	6986760	7298385	6282026	10289811	14477118	9645049	18265900	6081714	7131009	6943039	8277921	8699865	6915370	10914786	32665734	22594504	46146968	44104188	1	35473536	28257412	43743912	68189368	68189368	53600424	40902740	35150128	19570414	34271224	32916660	39460980	36223080	XANTHOSINE	XANTHOSINE [ C10 H12 N4 O6, tgt=89.17, overall=89.17 ]			(285.19458, 1208184.8)(286.07974, 209250.1)(287.08215, 29535.771)(288.0864, 4323.167)(289.0882, 5764.3)(269.74417, 912.07666)(304.61307, 220.93)(284.10205, 1911.0167)(310.57437, 1325.7325)(311.07272, 5913.367)(312.0748, 801.9067)(293.0635, 109092.05)(294.0671, 10768.14)	21.0885
G3P	522234	578056	489828	1157704	576556	396955	898460	823311	424514	689592	1049690	858239	324811	1651426	471670	317287	346236	287943	389337	308693	286782	418343	319960	274278	354188	385757	378448	378448	277310	1430635	440500	997503	290512	468656	359157	299640	G3P	G3P [ C3 H4 O7 P, tgt=46.46, overall=46.46 ]			(167.96481, 374.6422)(165.96692, 4812.792)(166.9592, 540.52)(203.82182, 397.74127)(210.97125, 5427.5254)	1.18272
CPD0-1465	349078	406385	292855	928946	390760	362361	400911	383439	256070	432582	419990	338222	1	100801	1	1	1	147919	1	1	1	1	1	132879	1	141103	1	1	1	1	1	1	1	1	1	177270	CPD0-1465	CPD0-1465 [ C11 H14 N5 O14 P3, tgt=67.44, overall=67.44 ]			(516.46277, 670.71497)(519.9867, 659.146)(551.50696, 224.82)(536.0072, 160.19)(555.96313, 13179.817)(556.9665, 1033.5762)(542.8268, 619.89355)	1.45139
CPD0-1467	9733504	10976612	46835328	8135360	71009832	72414640	1	14701284	39383720	44142680	9822339	11006993	1	56945840	13287598	30341696	60407664	74335448	1	6762671	3642406	5767385	6405370	4790712	5592649	1	4198184	4198184	11269601	3368377	1	6816977	20356096	5040286	7425225	1	CPD0-1467	CPD0-1467 [ C7 H9 N O2, tgt=76.19, overall=76.19 ]			(140.9016, 7303.3125)(142.06888, 433.85)(121.05085, 158426.78)(122.05541, 10364.738)(123.05438, 230.36165)(140.0704, 8801.559)(141.23488, 935.1434)(126.29433, 4372.368)(125.73523, 492.29337)(157.09749, 1002246.94)(158.1006, 37844.47)(159.09476, 37465.336)(140.08922, 11942.19)(162.85234, 3836.7603)	17.8691
STERCULATE	20754496	1165014	520843	2366756	2138833	1	998023	1663658	1053239	1397791	1458653	2507066	946648	1818071	1594490	2182611	1995444	2241063	567441	744204	305927	969055	657821	823980	1519071	2339848	273789	273789	1724860	3592130	1932052	2373951	1118522	1357578	5465060	2607971	STERCULATE	STERCULATE [ C19 H33 O2, tgt=73.93, overall=73.93 ]			(296.2246, 24016.51)(297.33926, 7345.385)(298.26587, 2812.0576)(278.29517, 6406.547)(279.46484, 1156.4078)(280.2518, 2329.7)(297.01202, 23649.43)(297.42825, 8179.1167)(298.76886, 2410.4226)(299.2723, 1765.55)(278.39197, 87831.695)(279.25073, 18924.338)(280.25974, 5423.582)(295.2742, 130.95)(317.24338, 19395.955)(320.09537, 12576.096)(299.23352, 1694.1733)	23.0866
CPD1F-462	1759719	2479923	1490748	575414	1074634	1618863	1675064	1612391	2099354	1857596	1418965	1	2094865	1434283	1405410	1	1184802	1313439	4338818	1209478	1045698	4307810	3880324	2681929	991113	1399955	1	1	3769874	2865715	3580589	2802283	2864878	3660613	1	3160366	CPD1F-462	CPD1F-462 [ C27 H30 O14, tgt=64.57, overall=64.57 ]			(563.6576, 761.57794)(564.5601, 1047.332)(564.6653, 170.505)(565.17, 1133.18)(581.2279, 20535.287)(582.1878, 8209.885)(565.812, 737.6914)(566.426, 719.3875)(596.19714, 44819.81)(597.20245, 13485.698)(598.2079, 4103.783)(599.20966, 883.8676)(578.4158, 4142.7446)(579.93555, 9697.91)(603.1661, 410.44998)(589.1653, 243.76)	15.0127
CPD-16876	11784449	12548624	9716573	844558	854131	1586046	1	1388333	5712247	1550806	353707	13787055	2624817	35803796	1168414	3376901	2600658	1	7212742	13827529	4055954	10019054	6064352	1915165	3114574	2064000	1	1	3619405	30350204	29511944	26021012	1	1095461	2857615	6232923	CPD-16876	CPD-16876 [ C5 H6 N O4, tgt=79.08, overall=79.08 ]			(145.70187, 5298.1763)(148.0361, 273.66)(127.52255, 14950.298)(130.0265, 226.43)(145.59978, 2147.2983)(128.73065, 54964.29)(130.63445, 5677.796)(165.3044, 53107.18)(166.31383, 17612.02)(166.4742, 5563.112)(147.25925, 18497.775)(148.58481, 6967.1235)(148.89784, 3700.542)(170.74327, 837.862)(171.0291, 1073.4375)(153.0186, 105.3)	3.62036
CPD-2483	1	26351172	1844715	3675164	9593489	26558120	19734164	10535582	1766172	6811877	9662825	2984101	1	82078792	3044345	1283543	11645620	43523692	20837036	38857276	26889816	9961569	7859720	40777680	39156320	24364532	30875896	30875896	31077048	15983760	12952433	37264740	51986720	29142060	64843448	24430892	CPD-2483	CPD-2483 [ C3H7N2O2, tgt= ]			(105.0542, 315.08)(104.05727, 30158.424)(105.05858, 509.58603)(121.08419, 364814.16)(122.09215, 23355.865)(103.07461, 2150.2556)(129.93121, 28610.916)(130.98073, 88090.695)(131.04901, 111375.766)(112.037735, 986.571)(113.0382, 2619.47)	5.62306
TETRAHYDROPALMATINE	2021482	12203924	7856879	6092099	7831084	4943102	3394554	6230764	1743839	2103619	8535930	4337544	10733015	12386389	8163357	8681172	12766643	4882399	5113359	6562797	7918218	8086877	5261032	5171132	6467629	7360055	8981468	8981468	2107479	4432972	4262511	1	1	5945788	7368946	4089069	TETRAHYDROPALMATINE	TETRAHYDROPALMATINE [ C21 H25 N O4, tgt=68.61, overall=68.61 ]			(355.52548, 62818.086)(356.18195, 26836.656)(337.9971, 15468.904)(338.84265, 4299.4746)(357.45163, 12779.979)(358.97134, 33727.78)(359.7951, 6442.088)(360.1958, 3229.44)(340.18164, 6586.483)(341.40494, 4180.347)(376.17984, 8363.205)(377.1225, 6704.879)(376.9689, 16974.467)(377.2193, 17392.46)(357.1429, 23767.264)(359.21512, 33162.598)(360.2175, 23870.803)(379.20316, 4577.4053)(380.9603, 6932.5815…	8.5473
AMP-GROUP	2702729	3576541	769968	1396468	2333679	2136386	2023520	1474566	1	2561009	3263669	1354894	1851787	2397550	1545654	1	2846321	1	7089619	3528870	7156805	5506716	6698566	3587720	5502056	4262217	7876023	7876023	5255669	4699175	4423159	2419963	5666231	3463858	7644555	4155105	AMP-GROUP	AMP-GROUP [ C10 H12 N5 O7 P, tgt=75.31, overall=75.31 ]			(331.0452, 10536.387)(332.0489, 1836.8499)(346.06906, 6407.612)(347.0732, 1187.8917)	18.9212
D-GLT	722924	1216039	767448	1024389	1	1909540	1086738	1219569	1	3199178	1100665	1457049	1007610	1847188	947272	855441	1	1579493	1107763	1	1	1	1	985194	1185082	1083471	1	1	1207301	3080499	1463265	1056240	1083977	1969046	2068065	2318373	D-GLT	D-GLT [ C5 H8 N O4, tgt=47.18, overall=47.18 ]			(147.04651, 11690.734)(148.04958, 265.4475)(130.40298, 2962.4963)(130.63937, 6931.05)(150.52103, 39899.277)(133.05045, 2347.2642)(165.967, 1526.066)(167.08653, 804.9046)(149.89162, 20036.791)(150.32733, 17437.625)(151.0782, 19956.14)(169.83682, 704.01)	2.04767
S-COCLAURINE	4934480	4000108	3084480	2443270	1715608	2086839	1955009	1749086	2383957	1619080	1570823	1235639	3470831	1683710	2861547	1079534	2200498	958244	1	1	1	1	1	1	1	1	1	1	1	1	2153599	1	1	2239643	2258591	1	S-COCLAURINE	S-COCLAURINE [ C17 H20 N O3, tgt=85.99, overall=85.99 ]			(286.1466, 11903.926)(268.4399, 935.9424)(289.49258, 7615.0137)(290.15927, 22391.0)(270.14484, 12081.253)(308.18826, 5367.597)(309.18045, 24739.99)(310.13635, 4691.777)(291.1233, 93612.48)(292.1263, 16538.494)	14.6622
CPD0-2060	7219744	1	777127	6470002	1744906	5478588	6059014	2829171	6601360	1130059	8946265	3817061	10267408	895715	4768750	5293948	10453556	4777391	1	1	1	973617	5330060	6981224	2396196	7203432	1	1	1	1940359	7402396	4370964	5665307	8705486	1321037	5761570	CPD0-2060	CPD0-2060 [ C5 H8 N6, tgt=77.53, overall=77.53 ]			(153.90471, 8841.529)(154.93011, 6108.4316)(153.0896, 2342.63)(170.28918, 166181.39)(176.07071, 77374.445)(177.07364, 3196.5137)(178.74068, 953.8933)(180.0761, 578.61)	24.8873
CPD0-1449	2789648	2616062	1769453	1600626	6292498	1	1578433	4935512	1323320	1385063	2998880	1700802	8333693	10302495	3385372	10085866	11833377	867547	3074231	3755182	3046560	6933809	2510338	1550423	1976497	33760872	7391412	7391412	2614153	2661103	3798264	1	2112233	3021551	3838933	7421014	CPD0-1449	CPD0-1449 [ C9 H12 O2, tgt=82.18, overall=82.18 ]			(156.06528, 622799.75)(138.65833, 3662.4995)(139.08824, 5790.803)(154.09439, 29246.969)(155.43224, 44702.094)(135.11057, 57197.97)(136.08188, 6555.57)(137.08466, 1684.285)(170.11732, 189975.36)(171.11835, 109583.61)(152.10678, 83795.47)(153.20341, 9265.498)(154.10225, 6423.628)(175.07451, 52181.145)(157.06389, 15334.837)	21.2105
CPD-15319	1665242	2933299	2816295	2460792	4854469	2612937	10206668	779020	1428442	1200623	2686408	2044986	3008355	1082714	3776880	1154795	2536788	1	2855358	1	1082274	5314037	2127233	1285625	2700600	2800457	2173524	2173524	1	1	2560793	3431363	6590016	2296400	1922821	3897338	CPD-15319	CPD-15319 [ C6 H10 N O5, tgt=47.62, overall=47.62 ]			(178.05925, 8550.499)(179.56496, 7870.95)(163.0579, 356.74)(179.01648, 6222.235)(179.73633, 671.61993)(160.11533, 2930.195)(161.3928, 6348.527)(194.77927, 43812.824)(196.59459, 7356.1655)(179.28566, 42549.527)(180.90683, 14326.784)(185.0433, 1562.79)	18.7234
DODECANOATE	17084048	11154029	12758658	5025304	6309531	6935517	7347515	7814270	7704311	20827440	13431998	16552189	5464949	7939244	8273403	6926075	7391720	10579134	7879378	10414968	11372070	9534340	10089443	10039040	8284882	8274511	6960568	6960568	8006961	8062908	7827419	10099422	3757759	5921602	5272361	8190317	DODECANOATE	DODECANOATE [ C12 H23 O2, tgt=82.72, overall=82.72 ]			(199.1694, 345187.88)(200.17172, 55145.03)(201.16342, 56337.523)(183.41666, 2380.4998)(219.20935, 3766.8364)(220.21257, 1733.0868)(200.1989, 372.28)(225.78703, 10128.385)(227.17462, 10920.698)(206.15616, 1399.9572)	25.8969
CPD-2461	5141069	5207448	1606053	5114506	5296789	1916077	564860	9981924	5822213	6237831	9851750	7495024	2055293	13008659	5847618	7243321	6280075	7440452	8144448	5481804	4126443	4351642	5078284	6770881	9011070	6385974	4066736	4066736	5681073	22453884	9984569	16091505	10865940	7665736	10144836	8337601	CPD-2461	CPD-2461 [ C5 H6 O4, tgt=97.93, overall=97.93 ]			(132.80167, 10922.564)(134.03574, 410.55664)(131.03508, 2199.7834)(113.02376, 1493.226)(148.06055, 77217.49)(149.06403, 4843.1826)(150.06651, 783.658)(130.0498, 335724.25)(131.22978, 16223.14)(132.05469, 807.35095)(156.90076, 1119.1201)	1.40811
CPD0-1437	1189050	2563942	490249	787863	969747	1160083	1665984	949824	1025880	7483882	843202	1293247	1	589939	823250	2060636	1077501	2595948	4534371	2682104	5115272	414024	7851073	3445569	4228212	6695635	229495	229495	46339624	5627757	4359192	2622765	21254248	4081448	6349256	5719311	CPD0-1437	CPD0-1437 [ O2 U, tgt=49.06, overall=49.06 ]			(272.0424, 2175.6357)(275.05557, 9308.735)(276.06113, 369.15002)(290.0829, 2541.42)(271.06067, 222889.45)(273.56802, 10030.202)(274.0685, 4510.04)	15.2457
CPD-864	20186854	18432524	15667624	8544473	13255291	9962755	16132506	13446643	13604125	22420530	1	1196635	15990006	4330419	6289446	13455622	7767884	14564213	6339500	4958477	6261983	4818996	3748900	4797659	4954785	1	5985888	5985888	2181658	5695431	5891839	4714533	5302143	4261040	6417381	8093746	CPD-864	CPD-864 [ C10 H14 O2, tgt=86.65, overall=86.65 ]			(167.88602, 21311.197)(151.0956, 71.56)(167.37355, 14586.027)(149.09526, 45674.863)(150.09999, 19662.104)(184.1317, 75141.22)(166.12273, 137749.72)(167.95984, 2975.483)(189.09032, 35130.656)(171.07921, 3449.1323)	26.7563
CPD-15371	139601	223895	1	146123	117189	149333	128261	112137	197869	192844	192811	163123	1	162920	162935	144821	133584	119252	1	1	1	1	1	1	1	1	1	1	1	1	1	1	1	1	1	1	CPD-15371	CPD-15371 [ C45 H46 O27, tgt=57.92, overall=57.92 ]			(1023.23615, 5633.7305)(1024.2393, 3202.3335)(1025.2422, 635.70935)(1045.2096, 2117.5737)(1046.2122, 1171.3849)	18.9135
CPD-14609	2488506	1	494586	1135909	11267035	1	2699051	1575448	2404987	8206797	979363	890128	2620648	2347951	5194583	2387509	1	1862292	2747098	3755501	6084863	5726837	5574942	4146892	6099501	2486903	6478115	6478115	2588479	6451231	2385136	4770505	5240091	2864956	3488290	1	CPD-14609	CPD-14609 [ C8 H16 N O4, tgt=79.15, overall=79.15 ]			(193.9299, 23994.219)(194.97768, 14060.321)(172.09654, 12895.596)(173.09995, 973.15515)(174.0908, 523.54)(193.7515, 11820.795)(174.5915, 8469.005)(175.44452, 8432.347)(208.7243, 210417.0)(209.71877, 30137.34)(193.13794, 7257.3066)(214.85214, 1557.855)(215.6018, 3917.0898)(197.51997, 1234.9358)	15.529
CPD1F-437	154307	158116	120658	170481	141312	130818	146697	162077	128082	209354	190239	147000	1	173577	1	1	1	1	1	1	1	1	1	1	1	1	1	1	1	250331	1	1	186119	141274	1	1	CPD1F-437	CPD1F-437 [ C21 H19 O12, tgt=79.68, overall=79.68 ]			(463.08643, 7125.6733)(464.09164, 1238.0067)(469.1103, 482.86)(451.09756, 129929.555)(452.10092, 26370.287)(482.8434, 1640.3656)(482.1285, 938.835)(490.0836, 790.5181)(468.0665, 840.30914)	14.3054
ANILINE	1	1	1	1922546	1	1	1	2113927	389525	1	1	464975	1	568543	1	1	227248	626407	1	1	1	1	1	1	1	1	1	1	1	1	1	1	1	1	1	1	ANILINE	ANILINE [ C6 H7 N, tgt=47.62, overall=47.62 ]			(111.09168, 37327.242)(119.3421, 508.67575)(121.062, 2022.3)	16.5302
INOSINE	101191824	67805912	68224904	36733664	112188784	145606976	47416624	89977024	71665280	51181572	28995736	38162892	67094256	31246332	60306800	48791068	72051520	52000312	106647544	138212752	92111616	148506224	119702320	45652824	80388768	32813348	105322664	105322664	57370124	74060480	77686744	27942352	30117724	108650984	118037896	38101888	INOSINE	INOSINE [ C10 H12 N4 O5, tgt=97.78, overall=97.78 ]			(270.0826, 13557.5205)(252.20724, 1822.5969)(271.62473, 572.43353)(273.38315, 1343.6885)(274.0984, 489.07)(253.58553, 211.63167)(287.54446, 2087.954)(289.457, 1605.4083)(290.4561, 696.74)(291.1246, 212.43)(268.1048, 1123529.9)(269.2845, 133779.77)(276.68018, 6392.0293)(277.33286, 15547.786)(278.0726, 2042.7859)	4.24272
CPD0-1422	6463063	15831329	3665208	7312577	7119275	19758362	27220588	32559348	20949228	121870072	11567242	15665729	17950284	3376484	1	27439688	17345616	17478932	4231313	32947212	45280296	11403106	12312951	14288099	41729064	1	4947421	4947421	15164724	1	21331766	10818166	1	1	6781609	1	CPD0-1422	CPD0-1422 [ C35 H67 O8 P, tgt=63.78, overall=63.78 ]			(648.0754, 9951.619)(649.0831, 9217.86)(649.5743, 4565.4497)(650.47144, 734.64)(630.91034, 20108.197)(633.58435, 41296.08)(633.9568, 44734.266)(648.10266, 14905.681)(649.2499, 7275.3916)(649.6296, 2850.6602)(650.4711, 141.65999)(630.92664, 25713.988)(631.8385, 54370.258)(633.475, 135037.58)(634.4599, 61154.1)(666.06903, 9597.153)(666.5978, 7295.206)(667.24536, 3934.7197)(667.4889, 769.82)(646.636…	29.4787
CPD-3041	52057348	17788376	9936057	14332188	13232225	8644206	19392620	13905207	39789328	7706522	8656995	4441183	46373488	1	17516184	10171395	69101712	5388106	99943192	140604048	69153880	1	46815072	14717628	23230040	17498606	133714632	133714632	51125944	16256240	111766184	2966063	21388820	82930416	141423472	16811016	CPD-3041	CPD-3041 [ C15 H12 O4, tgt=98.84, overall=98.84 ]			(256.0735, 16462.975)(238.06337, 8137.66)(257.08157, 1314575.6)(258.08493, 224279.62)(259.09042, 36207.35)(260.0956, 992.175)(239.0706, 435998.75)(240.07442, 75091.47)(241.07959, 11742.732)(274.56598, 1586.8829)(275.77798, 475.37)(258.1063, 170.72)(265.06693, 274.45)	23.8723
CPD-862	31444436	41568736	31389912	30427456	1	10776552	1	1	1	1	55506036	1	1	1	1	20115840	1	11725678	31166184	40241648	53738864	59139256	37229964	19826704	41870672	48708688	51874116	51874116	46425392	34664992	26570344	26280052	71543888	36286612	49369892	32907188	CPD-862	CPD-862 [ C10 H16 O, tgt=91.54, overall=91.54 ]			(153.12747, 1257095.1)(154.12973, 145907.34)(155.13036, 9416.915)(135.46417, 406549.0)(136.11981, 51901.066)(170.15395, 2705.8464)(171.149, 347.95)(152.14346, 6568.1245)(175.15889, 40540.4)(157.09741, 703622.75)(158.1003, 40784.566)(159.09506, 22472.021)	10.2372
CPD1F-420	1405262	4459501	737040	3509643	1781087	1817886	2290991	3184642	4754480	4173079	2373987	4414158	845207	5616996	3415138	3085025	1701011	1849660	2216514	4497094	3384727	2511286	2509492	3378838	3049809	2812597	3161293	3161293	2341777	4289408	1466658	5290757	4100003	3992171	3969795	5349237	CPD1F-420	CPD1F-420 [ C27 H30 O15, tgt=98.85, overall=98.85 ]			(594.15405, 2877.8308)(595.157, 836.73987)(598.5031, 23247.094)(596.169, 20262.48)(597.1718, 5071.98)(598.176, 174.91)(577.15515, 112191.29)(578.1585, 33439.383)(579.16046, 8034.6787)(580.166, 1219.2062)(612.92957, 1831.36)(613.20734, 2098.3)(620.51373, 2920.278)(621.8498, 1313.76)(622.16626, 1070.22)(599.13617, 7074.3726)(600.14044, 2408.3464)(601.143, 663.29834)	18.1116
CPD-9693	172303	275339	167650	405150	1332434	185949	300376	2794825	1	717787	268405	338505	153877	156284	366880	304829	314698	458357	172638	862832	295935	1	735603	1759317	159462	176331	1	1	615910	328237	1	353259	2074390	263556	1	264228	CPD-9693	CPD-9693 [ C29 H32 O16, tgt=60.92, overall=60.92 ]			(637.6736, 3837.95)(638.1788, 1288.9733)(619.1585, 1707.2279)(620.4931, 3458.78)(622.16626, 1152.55)(637.17615, 6833.2573)(638.18085, 1972.0026)(620.1665, 1265.9501)(621.1629, 6833.357)(622.1679, 1722.2035)(658.8663, 7561.918)(659.93414, 2902.4646)(659.2201, 836.185)(639.73, 2288.9265)(639.8728, 3834.6396)(640.20514, 3798.1724)(662.1686, 913.93)(663.1706, 505.2333)(664.1748, 160.58)(646.1587, 933…	14.5356
CPD-9695	2114318	2359669	1	1518910	1545473	1370035	1	3213321	869760	1	6700711	5956862	1398200	1	974736	684056	1730500	893610	2951351	1498333	2148860	4688381	1897322	1	1150495	1340410	2674116	2674116	1504427	1	2304224	1480868	1	1	3602546	2560751	CPD-9695	CPD-9695 [ C30 H36 O16, tgt=84.78, overall=84.78 ]			(658.21564, 1509.06)(638.37274, 1534.6749)(636.2042, 182.23)(638.2, 4520.92)(640.2048, 3593.51)(658.3183, 9601.916)(657.88635, 8760.04)(658.2159, 6999.68)(637.74524, 2355.898)(638.2073, 705.965)(640.2141, 5605.68)(641.2108, 124.64)(671.3529, 37349.895)(671.6893, 12505.09)(672.68835, 2458.6528)(673.24634, 353.25)(654.18524, 1895.6451)(655.1138, 1881.2041)(675.1895, 647.32)(659.1845, 1293.6871)(660…	18.1761
INDOLE-3-ACETYL-GLU	33400708	6331044	5330251	32200124	7749069	39331884	30663816	20044176	16175002	48507592	1	36093664	23926310	27087682	16757725	29807466	28477500	69645456	9127174	9769805	9834687	12262638	7810467	6291635	9779780	9579178	13643208	13643208	1	7378054	5519734	1	9723984	33131912	10635999	43185292	INDOLE-3-ACETYL-GLU	INDOLE-3-ACETYL-GLU [ C15 H14 N2 O5, tgt=65.10, overall=65.10 ]			(307.10126, 229.82875)(288.89142, 3828.539)(304.70364, 10116.179)(305.75717, 2687.4675)(307.4452, 1993.1733)(286.57678, 53438.43)(287.46008, 16006.994)(288.59595, 3341.7449)(289.5976, 988.5625)(290.0999, 695.33997)(322.2414, 1652.1272)(323.0204, 3961.7822)(324.13437, 3310.498)(302.92465, 1046.7146)(328.18875, 1542.5748)(329.09198, 3227.29)(310.0796, 12253.444)(310.0807, 3579.9248)	3.43622
CPD-16173	5940560	1663970	6131009	3215123	11175301	21137008	4046207	8961442	21850358	3213844	2113614	3469063	5578256	3278924	7167424	9970206	114703	5782329	6283495	7138365	5179650	11569184	11343265	3639776	6212691	2598757	189577	189577	47427008	5009896	4963696	4176459	2612669	6151296	7020062	1	CPD-16173	CPD-16173 [ C7 H5 N O, tgt=67.75, overall=67.75 ]			(120.36279, 79030.21)(121.54289, 8837.2295)(123.0458, 2695.34)(101.44044, 2646.9978)(106.89121, 1752.383)(121.02813, 112762.81)(122.07009, 31712.016)(145.03534, 2592.6167)(127.025085, 134777.28)(128.02742, 22273.885)	2.08294
CPD1F-453	673266	970231	143677	548052	342615	190502	258259	572025	315172	1262024	779480	1	820974	199815	356485	594119	473289	514842	559933	615348	812717	469153	217101	315364	294793	185499	777690	777690	214860	1228778	601547	206603	1151293	976637	749960	336540	CPD1F-453	CPD1F-453 [ C21 H19 O11, tgt=81.44, overall=81.44 ]			(447.09262, 21618.195)(448.0961, 4548.3115)(449.10327, 955.26)(467.93536, 282.364)(451.0626, 2067.2036)(451.45804, 1765.9701)(472.0897, 882.01)(457.0816, 621.02997)	14.1298
LUTEOLIN-7-O-BETA-D-GLUCOSIDE	6025691	11217366	1567528	5749546	5196129	4653395	4899912	3941501	4465842	8158640	8135449	4835193	5496276	4360048	5327061	4587532	5996636	4576907	6210446	3710769	10055284	5076642	7852335	5956885	8108290	6161356	8481373	8481373	2414814	8535360	4996642	3340840	11536806	4551379	7003777	4860555	LUTEOLIN-7-O-BETA-D-GLUCOSIDE	LUTEOLIN-7-O-BETA-D-GLUCOSIDE [ C21 H20 O11, tgt=99.48, overall=99.48 ]			(430.09366, 288.56)(471.08984, 84686.695)(472.09326, 18672.557)(473.09586, 4019.141)(437.10773, 4451.633)(449.1082, 201220.12)(450.1119, 43425.496)(451.11487, 8961.896)(452.11887, 1210.4028)	12.9026
N-NITROARGININE	3000377	962402	2720385	693898	1	7086043	1	1492967	3137166	1145480	582588	505794	3802085	1	2758491	2736860	911498	576903	1	4944403	4360773	808112	987785	2731335	1064712	1	1092143	1092143	7807946	3783790	1606827	1359871	1	1064195	1	1137542	N-NITROARGININE	N-NITROARGININE [ C6 H13 N5 O4, tgt=70.59, overall=70.59 ]			(220.02272, 5093.515)(224.1066, 160.24)(202.30936, 6272.5566)(205.38081, 3381.0999)(206.09653, 3400.248)(222.22668, 9707.695)(223.36221, 2801.0398)(205.61723, 72802.664)(206.51897, 20219.613)(207.1031, 6017.14)(237.70169, 7546.519)(238.12802, 1453.7881)(221.77916, 24682.08)(221.45245, 13947.185)(243.08853, 2032.2454)(245.0921, 2525.74)(246.0949, 193.55)(225.5399, 18460.324)(226.84732, 1421.6536)	9.77972
CPD-9699	15042475	17043840	13018594	16949248	17918632	15222260	8079779	11541396	1	7552256	10441697	17744568	4673326	16801590	9541901	2882464	5390904	12222453	6801581	12879819	13273277	11780551	7113271	19619744	19492588	20258336	8957445	8957445	8557143	9004626	7804147	1	1	15592862	6418898	14307963	CPD-9699	CPD-9699 [ C7 H11 N O2, tgt=61.93, overall=61.93 ]			(142.41734, 7205.92)(143.08424, 5115.04)(125.07278, 8339.396)(142.21115, 15468.243)(143.08517, 2657.522)(124.19737, 16370.155)(125.07163, 1538.1666)(162.65015, 18400.553)(163.12177, 15644.87)(141.13799, 44270.055)(143.09789, 393.603)(165.2869, 6844.296)(166.07404, 2409.4233)(147.92781, 17484.799)	9.04069
CPD0-1405	18288722	11107050	8613238	10615891	8986675	13850111	12627389	13694547	11088228	12268910	8834371	13596094	1549540	4399993	9482217	1	1	1	11170429	12777397	11747185	16258276	4358992	8547412	11222085	6018889	3239651	3239651	1	23610452	19787202	22323580	1	12292359	3958803	14367530	CPD0-1405	CPD0-1405 [ C14 H20 N6 O5, tgt=74.05, overall=74.05 ]			(354.15433, 16445.07)(355.4934, 5120.033)(356.1619, 964.4)(336.52713, 14458.123)(338.9466, 104594.48)(353.158, 12531.89)(354.1626, 7616.78)(335.64902, 3944.4624)(339.1525, 12613.18)(372.1882, 35291.633)(373.22583, 21631.992)(374.69553, 14907.028)(375.19702, 8093.71)(354.4179, 12664.752)(355.89984, 7941.9277)(357.1832, 8158.1943)(376.70514, 16459.57)(377.47827, 2203.2354)(378.64563, 2043.165)(380.…	11.7742
CPD-15369	166021	4628807	5366620	2135872	108965	2222687	4174588	1	578408	3406691	4463594	6051928	2075310	2734312	2342077	2523009	1282833	1247848	2820942	1067625	249246	629872	470720	544679	1	368630	1	1	1232613	772964	1478964	1832551	1714022	581998	1	1419358	CPD-15369	CPD-15369 [ C41 H68 N7 O19 P3 S, tgt=58.45, overall=58.45 ]			(1089.7362, 251.29999)(1090.9116, 1564.6056)(1091.6893, 1533.9)(1069.3436, 17362.654)(1070.3293, 908.41003)(1091.8667, 1143.475)(1072.5262, 2083.4128)(1073.4955, 2639.2886)(1074.2133, 3076.405)(1074.3378, 3671.63)(1105.8816, 2147.815)(1107.3889, 1313.465)(1110.4008, 900.45)(1112.3994, 1276.33)(1087.371, 1528.2)(1088.3795, 501.37)(1110.3333, 200.555)(1093.482, 4538.566)(1093.4618, 819.07355)(1094.…	29.0292
CPD0-1408	16971504	17756916	18791328	21836676	21116740	17307250	21906616	21522772	21491432	11448206	10824945	27350060	17849400	30257064	24233658	23195924	12562281	19847860	29492286	1	1	1663337	21795440	28532922	23179362	41185752	33726576	33726576	14236137	1256173	13859727	18927840	33567788	18154758	1	30056092	CPD0-1408	CPD0-1408 [ C8 H9 N O2, tgt=87.35, overall=87.35 ]			(155.07217, 4764.381)(135.86717, 8554.403)(136.9732, 8013.875)(152.07095, 627591.5)(153.07414, 57541.242)(154.077, 1527.3425)(134.06087, 11122.482)(135.05795, 869.81104)(169.09708, 14383.736)(153.09079, 846.95856)(178.5663, 7571.4)(156.0437, 112.13)	6.89794
CPD-15366	4144808	2993765	5511182	726210	157062	5644380	3130405	3190533	4563303	2538606	5057361	5225676	1	1	1	1606752	2651520	2562539	1	2567248	1	1	1981860	1	1	2305790	2854062	2854062	4297441	2803332	660014	1	1	1	1	1	CPD-15366	CPD-15366 [ C41 H68 N7 O18 P3 S, tgt=65.46, overall=65.46 ]			(1073.3434, 2475.4448)(1056.347, 289.48)(1072.3676, 2045.38)(1098.739, 1087.3868)(1098.3402, 2195.96)(1078.3342, 1032.0496)(1080.3391, 1449.6224)(1081.8438, 2582.51)(1083.3534, 5309.65)	28.3648
CPD0-1401	5597962	4393628	3073525	9989572	2081699	1	1637990	2996065	4805555	4636186	6948740	1647230	4035508	7579292	3633614	1277150	6878919	2594926	8071035	1	17932144	21465508	20937618	8380460	2746369	66246080	12034585	12034585	1	1534700	12295311	1	3767093	3126522	3319279	2447742	CPD0-1401	CPD0-1401 [ C11 H17 N8 O3, tgt=74.79, overall=74.79 ]			(312.48325, 16568.521)(313.15182, 6033.346)(313.1512, 3026.55)(295.26315, 7909.739)(295.7108, 1390.7101)(295.1362, 5312.02)(313.33167, 11226.051)(312.55307, 10248.811)(313.1564, 2701.5)(294.37048, 20718.896)(294.91476, 10002.428)(295.64825, 2661.7488)(330.06964, 33714.16)(310.63324, 32078.377)(312.17307, 10221.617)(313.1713, 13308.15)(334.22708, 20715.352)(333.1402, 13569.98)(334.1472, 2074.35)(3…	17.0975
CPD0-1402	14107692	1	7195228	5419501	5545349	18815588	1	1	25853090	1	1	1	6410481	11725434	1	1	5470423	6232044	18827314	21651192	5139247	1	1	1	1	1	1	1	1	1	15994523	1	1	1	16512073	1	CPD0-1402	CPD0-1402 [ C13 H23 N7 O3, tgt=60.07, overall=60.07 ]			(325.18756, 30016.887)(326.17874, 7841.9966)(308.84427, 20000.053)(328.06448, 25569.85)(329.08902, 8094.1855)(330.53912, 34853.16)(309.73386, 8697.951)(309.8554, 1056.1582)(310.1778, 1117.18)(344.9379, 61915.973)(346.2225, 13951.63)(348.2298, 186.43)(327.76035, 32823.223)(349.99844, 7320.851)(351.68518, 3921.565)(352.1884, 5836.25)(333.9732, 4669.374)	8.70791
CPD-15368	13732830	13722844	19581182	8822096	7743623	6990329	13874898	5717532	2748244	1	10089145	14676453	10786042	7984736	6420421	8571963	3450125	2831243	8611367	4070942	1	1	2582610	2508188	2516464	3834879	4048986	4048986	1575811	1288504	2199846	1	1	1	1	1	CPD-15368	CPD-15368 [ C41 H66 N7 O19 P3 S, tgt=71.35, overall=71.35 ]			(1067.321, 2498.9783)(1108.3253, 2727.2505)(1109.3226, 841.51337)(1110.3333, 166.91501)(1068.3417, 32752.652)(1069.3435, 16373.164)(1070.3329, 759.83)(1086.518, 1497.6044)(1089.7533, 859.42004)(1089.8507, 1466.995)(1090.8547, 1268.69)(1091.3583, 564.53)(1104.3553, 130.36499)(1092.3158, 4262.2124)(1093.3645, 664.9882)(1094.3152, 496.40704)(1097.3179, 527.5725)(1086.3531, 1929.4474)	30.7668
CPD0-1403	59074984	1	6022139	5548301	34174504	28924348	32367576	5056903	32717292	54284328	62959100	1	9318590	4803529	4800865	11007267	26500684	1617421	13509173	15287415	25871908	41143608	19587932	22605146	18474300	19568662	24559648	24559648	48439908	33764272	25911354	2847162	22519236	1	17157688	10740937	CPD0-1403	CPD0-1403 [ C14 H25 N7 O3, tgt=69.53, overall=69.53 ]			(340.4378, 11392.166)(342.45963, 7809.061)(342.2041, 7745.5)(324.26407, 7322.356)(324.3409, 5299.1797)(324.19904, 633.005)(340.51215, 760094.6)(341.47824, 164900.1)(342.21722, 41202.184)(322.40137, 12643.684)(323.91635, 5285.133)(327.2057, 7559.63)(361.4667, 18945.805)(361.80518, 21012.795)(342.4441, 116601.414)(344.03522, 216799.38)(344.23532, 968915.9)(365.1999, 16762.145)(365.95142, 6583.717)(…	18.8403
CPD-15367	117654	280669	307723	7873608	164222	204900	113486	122099	324527	172744	1442623	13181554	8478451	6982030	6631599	6343209	3182293	4751873	3659865	1948675	388952	974044	768991	980862	1186679	1887444	1396258	1396258	3716624	288633	1768441	139192	3945401	488784	406768	3650041	CPD-15367	CPD-15367 [ C41 H66 N7 O18 P3 S, tgt=58.45, overall=58.45 ]			(1069.3431, 10973.748)(1070.3295, 691.07)(1052.572, 1402.3475)(1052.3121, 1102.63)(1072.8643, 2429.679)(1073.1874, 1689.3438)(1074.1385, 2363.9673)(1074.3379, 5639.0703)(1056.338, 266.48)(1089.0792, 1859.448)(1088.3795, 501.37)(1070.3694, 2912.983)(1072.3683, 2336.2676)(1074.3676, 939.79626)(1076.3684, 299.438)(1093.7628, 2420.4224)(1093.3875, 553.9388)(1094.72, 488.56)(1098.3417, 430.19)(1078.52…	23.2937
CPD0-1404	1	1	1	5419501	5545349	18815588	1	1	25853090	1	1	1	1	1	1	1	1	1	1	1	5139247	1	1	1	1	1	1	1	1	1	15994523	1	1	1	16512073	1	CPD0-1404	CPD0-1404 [ C13H23N7O3, tgt= ]			(325.18713, 28828.115)(326.17712, 4797.16)(307.17654, 1960.385)(327.9121, 21128.525)(328.94913, 5376.4746)(309.43707, 8502.163)(309.18832, 739.56)(344.93774, 65083.098)(346.2225, 13951.63)(348.2298, 186.43)(328.38303, 22423.904)(350.18042, 3191.882)(333.83856, 4090.54)	8.23339
CPD-15364	4441488	3921848	6716375	3587363	1392114	1876319	3970479	2174960	3648089	1761754	3251781	4816853	2303560	5510694	2140032	1402102	1017395	945800	6092164	3233419	797340	1	1	1	3205561	456833	2071948	2071948	1313168	1667175	6611564	266324	3044718	1	1031018	1	CPD-15364	CPD-15364 [ C39 H64 N7 O18 P3 S, tgt=60.92, overall=60.92 ]			(1043.3297, 675.79663)(1044.341, 66.54)(1028.3281, 791.9057)(1030.3313, 2722.4324)(1031.3322, 1145.695)(1031.3367, 10306.04)(1047.3494, 485.62)(1028.7225, 586.8627)(1031.157, 1602.5852)(1032.032, 3513.598)(1032.5388, 3643.4297)(1033.3306, 654.17004)(1047.3535, 327.6367)(1067.3207, 906.8429)(1071.7081, 1198.7737)(1073.3362, 414.615)(1049.3104, 22831.357)(1050.3129, 40636.293)(1051.4417, 2409.0842)…	29.8942
CPD-3061	52057348	17788376	9936057	14332188	13232225	8644206	19392620	13905207	39789328	7706522	8656995	4441183	46373488	1	17516184	10171395	69101712	5388106	99943192	140604048	69153880	1	46815072	14717628	23230040	17498606	133714632	133714632	51125944	16256240	111766184	2966063	21388820	82930416	141423472	16811016	CPD-3061	CPD-3061 [ C15 H12 O4, tgt=98.84, overall=98.84 ]			(256.0735, 16462.975)(238.06337, 8137.66)(257.08157, 1314575.6)(258.08493, 224279.62)(259.09042, 36207.35)(260.0956, 992.175)(239.0706, 435998.75)(240.07442, 75091.47)(241.07959, 11742.732)(274.56598, 1586.8829)(275.77798, 475.37)(258.1063, 170.72)(265.06693, 274.45)	23.8723
CPD0-2099	546526	1331242	1500153	719356	294418	370524	1089867	401764	245232	652188	1011141	742684	324227	393426	382583	455625	356878	471289	404297	265778	228474	1387420	621214	537676	449692	502866	968632	968632	384097	3912255	1	2420647	518930	1672450	500914	2152488	CPD0-2099	CPD0-2099 [ C4 H10 O5 P, tgt=86.26, overall=86.26 ]			(170.42923, 2292.054)(172.53525, 193.29752)(156.0295, 52.14)(156.3647, 424.81998)(189.31628, 3597.9365)(192.07118, 1491.7767)(169.23222, 17509.975)(170.05429, 1749.9928)(171.04639, 387.33398)	5.65081
TROPINONE	30573322	33779300	23574884	3557453	4523986	1	18177022	8045897	17347780	5654639	1324753	18783720	8668893	39634456	7765803	18862344	29836222	25413470	1	1	10054714	1	4415592	9353145	5447285	855212	11940042	11940042	4242222	6448455	924769	5592729	1	1411288	1845711	1	TROPINONE	TROPINONE [ C8 H14 N O, tgt=67.96, overall=67.96 ]			(140.10683, 394693.0)(141.1058, 56500.395)(142.10327, 13133.119)(122.19673, 16683.697)(123.09153, 1004.38605)(143.11876, 540.1438)(166.21582, 3559.399)(167.10645, 3544.1992)(167.10542, 4666.4)(147.98824, 5335.221)(148.59709, 12628.588)	25.3089
INDOLE-3-ACETYL-GLN	27180812	20626616	1	47812996	33799564	11442381	16560745	37610528	56781552	79607384	27296466	21977000	38782656	1	1	28240202	30496514	16325608	18273156	10728784	10420482	16879262	8363384	1	11005523	9334303	17023228	17023228	9481647	6194498	2489390	20006904	1	6016867	5238466	1	INDOLE-3-ACETYL-GLN	INDOLE-3-ACETYL-GLN [ C15 H16 N3 O4, tgt=56.66, overall=56.66 ]			(303.2161, 1226.8965)(284.69836, 14301.471)(285.1064, 3598.95)(305.74408, 1798.103)(306.1336, 2672.74)(285.61285, 3231.08)(321.60764, 3909.9568)(322.15256, 2023.2151)(323.1599, 242.54)(302.13654, 6488.731)(303.1378, 1101.4587)(304.1442, 254.59668)(327.02478, 2495.8716)(329.42206, 3855.2737)(309.76804, 826.35004)	3.40947
CPD-885	49071768	39033856	37754360	38510280	34054632	33260048	45245108	35669252	32729880	30081076	37574196	47955152	43389696	32863946	42449092	42219928	35665316	31125680	39332172	39770400	26819058	42010536	30050212	22845680	5386729	1	26158526	26158526	7979462	21796956	25713674	14876980	1	1	34066768	17888144	CPD-885	CPD-885 [ C20 H27 O5, tgt=84.26, overall=84.26 ]			(348.53876, 4191.9893)(349.55768, 4576.4707)(330.11606, 397557.34)(331.1808, 65114.418)(332.18234, 14788.191)(333.3992, 2358.5115)(334.18958, 517.6389)(349.69882, 14517.026)(351.20242, 2296.8386)(334.86514, 2409.5767)(335.20026, 1386.98)(365.993, 595.1746)(367.80035, 1816.8226)(369.2355, 1833.69)(348.50836, 4325.7036)(350.21542, 3910.6902)(371.53354, 21718.414)(371.17368, 1042.5308)(353.28958, 99…	4.74447
CPD-884	295307904	101295392	1	251434032	230941088	195804672	235831008	215686336	191783536	275715168	294995680	258240720	239166080	1	234780128	196361072	140029216	224252064	1	1	243153552	1	266924832	1	270495328	1	276754752	276754752	245229760	2745241	5746417	1	1	1	1	1	CPD-884	CPD-884 [ C6 H13 N O2, tgt=98.24, overall=98.24 ]			(117.09285, 6991.155)(132.10188, 53180.605)(133.10161, 6259.419)(134.09665, 3830.618)(114.091736, 6877068.0)(115.094604, 524192.16)(116.09756, 29130.23)(153.13826, 4257.584)(158.71881, 32589.248)(159.096, 14202.57)(136.1222, 11790.779)(140.0854, 201.15)	11.3782
L-1-GLYCERO-PHOSPHORYLCHOLINE	1	1	1	668674	2090577	2839631	1	1	1	1	9482944	1	1889357	3914207	1943025	1839393	1	2181069	2608385	1	5665179	1	1	1	3983304	4220316	1	1	1	3492952	2840444	3695019	4412303	3089100	7475684	3264843	L-1-GLYCERO-PHOSPHORYLCHOLINE	L-1-GLYCERO-PHOSPHORYLCHOLINE [ C8H20NO6P, tgt= ]			(257.94006, 1125.9415)(239.5633, 83568.31)(240.3482, 12720.101)(241.09888, 1580.4601)(242.10765, 119.84)(258.11032, 19148.176)(259.11423, 6820.423)(260.12146, 347.22668)(241.43604, 23919.617)(243.10571, 5525.6235)(244.77678, 1387.2666)(245.1121, 2685.98)(276.25092, 3068.9868)(279.1425, 1605.96)(258.38065, 8965.71)(259.2551, 3954.305)(282.3214, 1893.3446)(284.2014, 1166.609)(264.24445, 7763.0845)(…	8.98213
CPD-10051	31444436	41568736	31389912	30427456	1	10776552	1	1	1	1	55506036	1	1	1	1	20115840	1	11725678	31166184	40241648	53738864	59139256	37229964	19826704	41870672	48708688	51874116	51874116	46425392	34664992	26570344	26280052	71543888	36286612	49369892	32907188	CPD-10051	CPD-10051 [ C10 H16 O, tgt=91.54, overall=91.54 ]			(153.12747, 1257095.1)(154.12973, 145907.34)(155.13036, 9416.915)(135.46417, 406549.0)(136.11981, 51901.066)(170.15395, 2705.8464)(171.149, 347.95)(152.14346, 6568.1245)(175.15889, 40540.4)(157.09741, 703622.75)(158.1003, 40784.566)(159.09506, 22472.021)	10.2372
S-RETICULINE	1	4455362	17130992	4332255	1	4276240	4178285	1	1	1	1	1	1	4290173	1	2858114	3557756	1	1	1	1	1	1	1	1	1	1	1	1	1	1	1	1	1	1	1	S-RETICULINE	S-RETICULINE [ C19H24NO4, tgt= ]			(330.1684, 6470.98)(312.15668, 98253.07)(313.16125, 18432.264)(333.81064, 2995.1362)(335.02286, 9366.504)(335.1903, 4236.41)(336.1931, 8947.06)(313.17102, 1583.51)(349.0809, 12028.434)(350.20776, 1640.815)(331.62723, 25345.436)(353.16357, 3059.8823)(337.1527, 606.44)	14.534
CPD-13518	7929472	6905080	7114287	4757977	9447442	10160864	9122986	15719611	10826813	5795248	12916649	12488373	13995773	10027283	11510158	6209430	9725919	10847004	8822457	11947850	14769547	19779070	6501681	7694801	10068450	8219500	9188431	9188431	10469882	9185896	5617517	9866733	7530400	9987018	8233512	6768445	CPD-13518	CPD-13518 [ C6 H15 N4 O3, tgt=82.95, overall=82.95 ]			(193.81293, 16644.572)(195.09412, 22832.027)(195.1227, 38872.22)(175.79822, 8129.6475)(177.0114, 12277.992)(177.1138, 957.33)(192.48367, 7158.232)(193.1296, 6637.7)(174.11176, 8887.63)(211.0423, 18626.305)(213.54982, 19645.793)(214.1574, 1692.93)(193.89409, 6275.7515)(214.81578, 2883.2292)(217.6117, 2536.835)(219.11609, 2972.9568)(198.01508, 75366.78)(197.89624, 24089.986)	13.8046
CPD-19795	15921677	9022991	7399082	3967127	3974962	2397338	6328214	4298144	4901796	6387527	7695531	7001186	6692141	4953977	6114422	4080588	12604413	4818614	9997011	17833378	5649584	10229751	3262757	1958033	2319668	8819535	7728037	7728037	1	9568736	6135619	4919804	6435708	4846187	8148856	3421824	CPD-19795	CPD-19795 [ C28 H47 O8 S, tgt=86.24, overall=86.24 ]			(548.7566, 15629.06)(549.30493, 21830.686)(529.7753, 10602.312)(530.6532, 9702.067)(530.6905, 16466.037)(547.80707, 5936.045)(548.3077, 13598.243)(547.3126, 1642.47)(530.66254, 829.7328)(532.2991, 6473.7246)(563.5739, 1159.9076)(564.3436, 948.47)(543.3533, 25737.715)(545.327, 1156.59)(569.043, 4571.614)(570.96106, 13403.633)(550.3662, 654679.56)(551.3695, 228943.58)(552.4048, 49893.434)(553.3302,…	25.4631
CPD-19794	10613039	16475480	8794943	8473308	8168513	11238777	10695366	6031443	8667242	1	8097458	10145650	11029857	9060766	8887118	9996376	7045632	1	4241176	4203182	4759516	1	7034855	1933258	3304453	2684491	3865686	3865686	4863095	3053296	1	5081097	13525506	3048878	4608652	2420307	CPD-19794	CPD-19794 [ C28 H47 O9 S, tgt=57.10, overall=57.10 ]			(563.2023, 13317.434)(564.5597, 15650.369)(565.0521, 11196.594)(565.3033, 6865.3228)(542.33606, 6806.8413)(545.48553, 6030.5815)(546.79047, 10773.08)(547.2873, 4982.9)(561.0557, 34819.64)(562.30853, 14688.034)(563.3141, 3782.7764)(545.21344, 8953.736)(547.1683, 13364.592)(547.6374, 22701.734)(578.607, 3403.9614)(580.4804, 4014.774)(581.3291, 1502.12)(559.5165, 101349.05)(560.5291, 38171.066)(561.…	17.8609
CPD-19791	1	11503562	10555727	12790887	11028258	102086016	15342221	9737140	13725329	12235483	12565168	5761311	10046336	6426663	12372768	12461307	12918343	12203417	105281640	24388124	20651568	39319216	17723962	86648544	105530464	100613808	28822732	28822732	15746467	7383108	14763389	6107739	1	9176675	17017142	5163860	CPD-19791	CPD-19791 [ C21H29O5, tgt= ]			(362.75735, 42284.977)(364.27615, 7509.3027)(365.2156, 2449.6274)(344.8633, 309639.47)(346.3997, 53627.168)(347.203, 11978.266)(348.20596, 18369.695)(362.4129, 43089.363)(364.55026, 6048.047)(345.16095, 139674.81)(346.20532, 28301.44)(347.5403, 6996.544)(349.04443, 62249.332)(349.2103, 57577.77)(381.1507, 4729.5713)(380.22992, 3819.638)(365.12656, 7815.6587)(365.9031, 5790.31)(387.26306, 709567.9…	13.9263
CPD-8141	14467163	4024710	2461602	3525782	3240606	1999164	4774343	3267865	10209341	1770619	2140889	1054957	12145924	2140443	4081065	2381063	20249496	1250482	29684282	46519836	18186102	73647216	10908256	3350779	5195453	3745135	44919440	44919440	12813128	3476586	37508728	834819	4982854	24144904	48251848	3972253	CPD-8141	CPD-8141 [ C15 H10 O3, tgt=99.06, overall=99.06 ]			(238.06322, 13139.109)(220.05307, 1408.3901)(239.07062, 661831.5)(240.07439, 115436.36)(241.07939, 18318.996)(221.05977, 134687.7)(258.1063, 243.89)(241.89154, 28566.4)(242.25029, 3678.4949)(243.10214, 15682.054)(265.06696, 557.52997)	23.8723
CPD-17688	1	1	1	2234846	1185271	1	1	1	1	1	2795075	1	1	1	1	1	1	1	1	1	1	1	1	1570948	1621058	1	1	1	1	1487086	1	1	1	1	1	1	CPD-17688	CPD-17688 [ C15H19O5, tgt= ]			(281.1293, 5100.9897)(263.61624, 4820.802)(282.13913, 142735.3)(283.14145, 17462.86)(284.14026, 6034.41)(263.1248, 165.96)(298.16208, 129467.24)(301.17166, 48326.047)(302.1732, 12365.68)(302.1168, 183.99)(284.09827, 90691.5)(285.60266, 6604.52)(286.1049, 1805.85)	8.41054
CPD-8144	1570806	2256010	1	2137854	4897193	1190194	4886879	2364910	1937540	1551319	1370292	1010793	1206307	6118889	1	863351	1276237	1359472	10603268	1275167	886598	9245851	795413	1193772	1448742	2280497	10566116	10566116	1240581	1987992	7706111	623431	1489396	2643911	1420725	1229980	CPD-8144	CPD-8144 [ C21 H20 O8, tgt=75.08, overall=75.08 ]			(404.12738, 13932.753)(401.12524, 10252.534)(402.12756, 1414.0933)(383.4452, 598.68335)(403.07864, 12535.467)(403.88306, 3822.18)(403.63672, 333.64667)(385.64578, 14297.998)(384.8206, 4138.243)(419.29715, 34581.992)(420.15527, 13126.457)(423.16434, 894.7425)(402.5764, 17637.943)(403.2722, 13313.48)(403.14697, 8891.739)(404.48758, 48549.043)(405.15085, 124022.75)(424.44415, 3631.963)(424.78024, 98…	11.7499
CPD-8158	1651916420	1303030910	1306562430	1534153220	1572887680	1661513730	1267968260	1019612990	1083142140	15906828	69444728	1581114880	1	1116826880	758553340	194658896	1511525500	588032320	1454880770	3149509890	339353088	135003632	671844420	623161920	3354899710	782372610	494209408	494209408	1474504700	664421820	4376805900	3852365820	6040879100	1689354240	1	31891468	CPD-8158	CPD-8158 [ C42 H80 N O8 P, tgt=81.91, overall=81.91 ]			(757.6768, 1709257.9)(759.56274, 695657.94)(759.563, 381691.5)(743.14496, 33199.445)(744.6847, 32197.79)(744.557, 79579.06)(745.562, 38277.625)(758.56934, 4060967.8)(759.57275, 1838885.9)(760.57947, 870091.94)(761.5831, 196365.47)(762.5789, 43047.582)(745.09753, 31736.133)(745.90106, 77169.12)(743.5661, 36615.39)(744.5785, 32126.36)(745.5821, 13043.76)(746.5696, 17470.9)(775.761, 25303.516)(776.6…	28.2745
CPDQT-299	19901402	15726095	1	1830050	1532069	1233277	1115595	6898012	1	4830594	1280660	873264	10806435	3143665	1277912	1	18781128	1	24704578	2221473	21284408	8988547	11280887	2975076	4114224	3671234	1611384	1611384	12288060	9787086	22079424	5147651	3084451	803550	36972240	2011954	CPDQT-299	CPDQT-299 [ C16 H30 N O10 S3, tgt=56.47, overall=56.47 ]			(497.84073, 907.79114)(497.0968, 2039.6976)(498.10092, 310.11)(477.092, 74.51)(493.39874, 3908.7031)(494.11722, 446.295)(476.16302, 7411.81)(476.4069, 5373.396)(477.30933, 1629.246)(512.28375, 13504.314)(514.13934, 6485.178)(514.1463, 1681.4291)(513.1607, 87.84)(493.1249, 9066.505)(494.45712, 3488.3604)(495.13004, 396.80667)(515.094, 2749.6035)(516.1019, 997.98)(517.0879, 976.23)(498.4122, 2817.1…	18.8745
CPD-8159	164716416	2044126080	1787527810	86605280	509084960	2640973820	68335120	502493792	178910960	429903200	61270860	76300592	83215968	1270141180	469424384	729376700	215556624	169924368	2304354560	2804463360	3440859650	1647575810	15738427	22547972	535607200	992093120	270671104	270671104	532457024	1505880450	62444256	1	1	93627152	447399648	613784320	CPD-8159	CPD-8159 [ C42 H78 N O8 P, tgt=82.30, overall=82.30 ]			(756.02594, 1672752.4)(757.6487, 1777576.0)(759.568, 103707.0)(738.0599, 30454.113)(739.25775, 18556.885)(739.54785, 70.329994)(756.793, 3322667.5)(757.6548, 1815948.8)(758.8021, 672593.06)(759.56274, 259828.08)(760.5733, 27604.99)(742.4498, 82617.59)(739.5479, 19760.004)(740.5559, 358.76)(773.5869, 50314.133)(774.5901, 24178.541)(775.5953, 2262.4968)(758.9356, 1943159.4)(760.10785, 872171.25)(76…	26.0728
CYSTINE	6678485	4393164	5688589	5538779	3967088	2262053	3268577	3520141	2428666	4693652	4665586	3097147	6580429	1657119	3806137	2171834	4832624	3034663	6646305	4543009	6025675	6477366	6128841	3112725	3145890	3260398	5363778	5363778	1458290	5858111	8827077	2146250	4588016	4009701	6677723	5133660	CYSTINE	CYSTINE [ C6 H12 N2 O4 S2, tgt=60.00, overall=60.00 ]			(244.2799, 1894.2502)(245.9561, 1435.3286)(246.0197, 1962.06)(244.77417, 635.385)(224.92166, 1163.6019)(227.0169, 70.59)(259.94324, 15910.936)(261.0014, 10065.203)(262.29663, 24818.053)(263.28552, 84584.945)(264.05713, 9932.931)(264.1261, 38248.297)(264.0206, 3622.74)(249.42325, 2338.95)(246.0121, 3807.15)	1.60661
CPD-8157	219676784	98039368	289702912	907463230	221807008	1476141440	884825280	1	1455836670	3959571	4279308	65219824	1607499010	1891439100	1246089600	883868160	314110016	1204786560	454581600	350769120	2113379840	957379200	216216448	2396616190	922536060	744985150	706856190	706856190	1317001220	721722820	64108232	1	77017400	450232800	526376672	152641712	CPD-8157	CPD-8157 [ C42 H82 N O8 P, tgt=63.28, overall=63.28 ]			(759.69885, 1062305.0)(761.0281, 301315.0)(762.0319, 78902.61)(763.3036, 7609.5703)(763.5835, 1410.01)(741.9426, 4212.862)(760.5849, 1354781.2)(761.589, 562380.25)(762.5918, 167208.94)(763.5939, 45964.71)(764.5963, 6697.872)(747.24023, 29137.975)(747.9251, 17285.02)(747.3381, 14083.581)(747.5894, 6352.77)(777.6148, 10123.591)(778.62146, 4827.145)(779.6197, 1260.4349)(765.3043, 7080.8955)(782.5970…	29.2735
CPDQT-296	767887	901678	1	550281	1	354848	493758	433458	434418	447948	1	280812	418741	1	633677	425673	259439	1	268012	1	484740	473775	680801	290831	635627	1472058	464233	464233	465016	505449	691676	1	717342	392437	969420	637112	CPDQT-296	CPDQT-296 [ C15 H28 N O9 S3, tgt=34.27, overall=34.27 ]			(466.33994, 632.4575)(465.55676, 2825.029)(466.1062, 251.19334)(446.6928, 4662.2046)(447.29645, 1025.366)(482.56586, 1047.1272)(487.1219, 478.752)(462.4121, 7993.7817)(464.1845, 3685.137)(486.8863, 295.146)(469.0749, 376.90002)	14.0422
DELTA1-PIPERIDEINE-2-6-DICARBOXYLATE	843164	2397847	875560	1651904	2440974	1110790	727294	852861	1770866	694799	505779	2553008	1	1308818	1084253	412779	1	2245957	1	1	1	1	1	927383	1	1	1	1	750108	1	1	1	1	1	1	747682	DELTA1-PIPERIDEINE-2-6-DICARBOXYLATE	DELTA1-PIPERIDEINE-2-6-DICARBOXYLATE [ C7 H7 N O4, tgt=70.93, overall=70.93 ]			(170.5208, 23953.996)(171.24869, 4586.2427)(155.62158, 7393.7993)(156.0436, 5201.6616)(156.71173, 940.76666)(189.41014, 24879.787)(190.07765, 916.835)(189.0724, 1145.55)(170.4401, 1996.4437)(194.03276, 1256.1987)(174.96652, 7540.6445)(178.0269, 243.56)	1.74406
CPDQT-295	1	602394	386504	891685	616274	731840	165475	806427	559859	1	1880445	572948	1	1575123	1	496661	1	1	300081	259214	1	265192	1	387504	362886	430090	325466	325466	1	583885	284182	1	652868	306184	312882	533542	CPDQT-295	CPDQT-295 [ C15H28NO10S3, tgt= ]			(461.07175, 899.1167)(461.0731, 67.09)(479.5973, 2101.71)(481.0899, 3715.18)(482.0935, 207.32)(501.28064, 2238.0186)(502.4823, 3886.9373)(503.12054, 1931.615)(479.05817, 5039.836)(485.10577, 246.66)(504.0749, 181.44)(489.0678, 678.65)	15.6386
CPD-9602	6023643	11280506	354364	652871	5191771	4745338	1	245664	629738	8210423	1	516416	5505336	409788	5331835	1330757	6023245	710685	499847	3867228	10111398	433008	399033	467041	438011	6298045	466709	466709	2416647	456871	515917	400062	1	454183	425946	395846	CPD-9602	CPD-9602 [ C20 H22 N2 O11, tgt=59.67, overall=59.67 ]			(449.6844, 100974.12)(450.4673, 28939.229)(451.25912, 7129.7817)(452.11795, 932.33)(453.1204, 180.13)(469.13614, 3320.1724)(470.80713, 1479.1499)(469.1355, 1094.53)(451.0419, 7184.194)(451.8434, 1788.6086)(452.7976, 508.39)(485.9478, 3079.8596)(487.16544, 1824.4241)(486.83838, 522.7767)(487.1622, 137.93)(467.56143, 3863.2876)(468.53433, 2159.0122)(471.23264, 3764.002)(472.16498, 1353.1538)(491.87…	12.5237
CPD-9603	2259668	2916961	2198101	1395664	2358269	2800584	3590493	1668634	2443148	1	1280765	1	4995716	2360580	2210909	1937232	2389332	2781092	1386922	4039874	1896011	2315786	1247242	1419461	1438390	3983781	3655545	3655545	1285596	1075353	1004551	1044478	2191445	1584153	1892786	1402859	CPD-9603	CPD-9603 [ C26 H32 N2 O16, tgt=52.48, overall=52.48 ]			(613.17285, 2186.0266)(612.16693, 2301.32)(613.1684, 1385.19)(629.18677, 25396.52)(630.19037, 7400.466)(631.1939, 1906.1582)(612.9288, 1410.2524)(646.28546, 68677.37)(647.20374, 24305.062)(648.20667, 6346.692)(649.2087, 1000.45807)(650.22266, 213.84332)(628.2036, 42354.69)(629.2228, 19921.15)(651.16736, 892.7101)(633.1443, 367.93)	13.645
CPD-9608	133495	1	147546	119893	1	215167	1	1	161062	1	1	144718	272499	140900	144407	175548	119043	127103	1	1	111025	1	899465	551696	124707	724776	147068	147068	890608	906065	687723	532179	1	1243897	1	615383	CPD-9608	CPD-9608 [ C10 H5 O3, tgt=47.23, overall=47.23 ]			(177.10997, 1446.5109)(178.03593, 4535.2964)(175.03531, 228.95)(159.02888, 1419.425)(193.34872, 2856.1895)(195.06662, 1263.917)(177.38979, 14583.466)	8.88023
CPD-13511	538775	927762	1530677	5361504	1962269	968382	3995465	3591513	1153904	1	5181693	3830671	414774	1	471271	473109	604602	900066	1	507219	1	1	1	941626	1203635	1648273	1	1	1128938	1	857968	675447	1	1209320	1	1182521	CPD-13511	CPD-13511 [ C16 H12 O7, tgt=48.36, overall=48.36 ]			(316.05362, 22967.14)(317.05618, 3688.8499)(299.04666, 118843.516)(300.55295, 48535.348)(301.55933, 35087.56)(302.56238, 17671.027)(303.0637, 14099.2705)(318.4027, 30344.494)(318.0695, 7996.2803)(319.07202, 703.195)(299.0555, 17009.32)(300.0595, 2794.55)(301.0692, 238.65)(334.08908, 1584.0133)(316.0852, 10889.76)(317.0877, 605.58)	9.66633
CPD-13510	2256844	1	864439	4540524	7124996	2228394	1	1632006	888743	1999025	1692123	2406188	2167931	2362165	1098762	2048437	834860	618057	7473087	4005356	6388128	4390062	7549001	10525565	5442969	8176898	1770305	1770305	2662136	1	1	1	5876556	4704328	2626506	6428408	CPD-13510	CPD-13510 [ C22 H24 O10, tgt=65.76, overall=65.76 ]			(448.37726, 54679.543)(449.3308, 16129.196)(451.1408, 480.02)(431.07574, 91939.51)(431.13394, 26805.541)(432.13748, 4857.8022)(433.14685, 1010.35333)(449.14474, 13450.107)(450.146, 3162.085)(451.14682, 511.77)(435.14496, 1157.52)(468.7139, 8420.105)(469.2395, 4066.9417)(469.35214, 1171.1433)(449.5404, 5285.6978)(454.1747, 602.43)(473.03574, 6709.5693)(475.0305, 5119.662)(475.94083, 1702.508)(476.…	13.4362
CPD-13509	154307	158116	120658	170481	141312	130818	146697	162077	128082	209354	190239	147000	326390	173577	204177	270811	172804	299615	450432	284737	189252	428867	305984	185582	226945	1	664946	664946	216670	250331	211109	414461	186119	141274	1	1	CPD-13509	CPD-13509 [ C21 H19 O12, tgt=79.68, overall=79.68 ]			(463.08643, 7125.6733)(464.09164, 1238.0067)(450.7617, 1846.7933)(451.0927, 4328.44)(466.1051, 3225.1274)(466.1065, 1112.265)(449.55746, 62813.785)(450.2805, 14920.449)(482.92813, 1676.085)(482.1285, 938.835)(464.97586, 4872.3975)(466.40915, 1365.87)(467.9617, 1225.4633)(469.13168, 1783.06)(489.81827, 761.7774)(468.4025, 681.44336)	12.015
CPD-8155	50414680	57273964	58001456	31701972	12687968	27648048	78156016	27169684	27229516	23880192	64028504	145256400	90676104	28185710	72362032	62550344	20960216	104785800	5815450	15283029	18343468	27292830	30120964	1	11737358	2059941	9767494	9767494	14502347	14456446	1	6880607	28600236	28709534	23408612	8542175	CPD-8155	CPD-8155 [ C55 H74 N4 O5, tgt=64.07, overall=64.07 ]			(870.9056, 88803.984)(871.93176, 46761.527)(872.9913, 19480.908)(873.8727, 7751.476)(877.0803, 17624.756)(877.5859, 9117.96)(858.5677, 8688.017)(857.5623, 9009.8)(858.5604, 8295.97)(873.18567, 7169.9897)(876.0963, 25291.63)(877.0956, 34039.4)(878.09125, 36914.203)(878.5823, 74294.14)(857.0628, 50915.39)(857.72424, 47840.594)(858.9927, 26739.297)(859.57666, 20957.062)(859.5705, 25051.88)(892.6733,…	27.4087
CPDQT-281	299141	136060	174074	172791	261078	286793	149639	192732	319424	152065	155570	352359	311125	241591	191955	259097	225146	224188	116305	282459	187130	221451	1	249738	1	1	133173	133173	237685	1	1	549874	1	1	349996	209644	CPDQT-281	CPDQT-281 [ C12 H22 N O9 S3, tgt=55.05, overall=55.05 ]			(420.79486, 1089.595)(421.0396, 168.89)(407.40637, 1787.7225)(423.0489, 912.01)(438.29453, 6687.108)(439.08575, 1480.8845)(440.08197, 381.18854)(423.56714, 1152.475)(444.17746, 1519.6543)(445.17535, 6156.086)(446.23428, 540.26794)(447.03177, 621.0334)	6.10433
5-PHOSPHORIBOSYL-N-FORMYLGLYCINEAMIDINE	204749	610425	307726	1493656	291614	597053	247205	533797	341970	784633	1	1	197272	422254	276408	352830	294747	185769	182808528	818928	525403	452763	287264544	726309	538194	492561	1020304	1020304	863742	733196	1	991260	1	902407	838545	1180396	5-PHOSPHORIBOSYL-N-FORMYLGLYCINEAMIDINE	5-PHOSPHORIBOSYL-N-FORMYLGLYCINEAMIDINE [ C8 H15 N3 O8 P, tgt=70.15, overall=70.15 ]			(312.17865, 7269.699)(313.40048, 3479.3818)(314.07367, 226.20998)(299.0556, 10342.95)(313.071, 9190.051)(314.07748, 1342.3939)(296.96225, 4353.986)(297.56604, 761.51)(331.42957, 3683.0066)(334.0975, 1117.58)(315.08707, 247256.88)(316.0901, 42097.6)(317.0933, 5539.744)(335.85333, 487.508)(317.0371, 12571.745)(318.0393, 3523.1802)	17.6954
STRICTOSIDINE-AGLYCONE	72443464	3362105	1595396	1668262	1939936	7369571	2904411	46925992	3700952	4213533	4113527	1187512	1573149	66897904	53043800	59299980	2777705	1	63999536	1	65525956	83918040	3388116	47305112	3679351	6161984	89103248	89103248	42385576	54476948	5069554	1	2800760	6790760	3083613	36378804	STRICTOSIDINE-AGLYCONE	STRICTOSIDINE-AGLYCONE [ C21 H25 N2 O4, tgt=69.98, overall=69.98 ]			(372.1884, 40357.414)(373.19144, 12029.455)(374.19635, 2210.9456)(354.34213, 5898.1523)(355.4308, 5179.2075)(371.31976, 23139.473)(373.0304, 19665.264)(354.73123, 35801.72)(354.87207, 16528.217)(354.1821, 4629.47)(389.71994, 11422.134)(370.2078, 24596.693)(371.87497, 53970.06)(394.24646, 182208.95)(396.3519, 87571.01)(396.1844, 8224.1)(376.48746, 4473.2305)(377.67188, 1602.3779)(378.17017, 2115.6…	11.8018
CPDQT-284	1	155652	1	366226	1	1	1	1	1	1	3234501	1	1	363997	1	1	1	1	193544	1	1	1	1	1	1	134522	1	1	1	143874	1	500453	166891	1	1	282791	CPDQT-284	CPDQT-284 [ C13 H24 N O10 S3, tgt= ]			(450.0587, 93.83)(437.82056, 902.3122)(438.37305, 537.76337)(451.0648, 734.9267)(452.0672, 351.98)(435.05527, 506.30402)(437.0548, 153.34)(475.0807, 2397.93)(455.07675, 690.675)(456.0774, 468.26)(457.0756, 509.12)(479.0392, 187.49)	5.99928
CPD-8123	1142934	374059	754503	1244636	201392	193009	770086	1015881	1123158	1795092	642733	805897	2247900	2669281	2211412	830664	984268	812614	1478400	333797	949501	1505021	757944	1044125	1670910	359782	1833575	1833575	1377442	1137062	2633770	1	1685773	1574336	2233402	1087157	CPD-8123	CPD-8123 [ C10 H10 Mo N5 O8 P S2, tgt=50.03, overall=50.03 ]			(521.5472, 1198.6733)(515.8862, 373.37)(524.8746, 321.36)(501.53113, 1388.59)(505.86902, 502.60498)(508.8653, 369.2)(510.8637, 683.18)(511.8654, 279.6)(522.5549, 7194.148)(523.48834, 1845.0641)(517.88586, 893.73)(518.88513, 403.38)(503.5006, 3661.4788)(507.54318, 640.7759)(512.8768, 461.82397)(514.8845, 27812.01)(540.04083, 9368.859)(541.9064, 2267.6655)(549.4852, 30053.045)(549.918, 128588.29)(5…	23.4954
CPDQT-286	321764	305206	295560	283891	293413	322743	349311	247713	262588	118728	262772	462338	325305	417306	253204	288654	267199	317456	475072	561324	445917	513800	369694	475985	583022	466761	493914	493914	320901	510960	438535	573426	544973	542967	444519	469993	CPDQT-286	CPDQT-286 [ C13 H24 N O9 S3, tgt=39.66, overall=39.66 ]			(416.04678, 8418.559)(417.0501, 1393.5438)(418.0455, 756.6504)(456.0916, 699.92096)(457.80783, 981.82227)(441.08078, 646.2056)(458.55438, 1699.645)(458.071, 1544.46)(440.0428, 494.14)	14.2726
CPD-8124	2332194	2178212	2535226	974375	2381715	2128751	613353	509419	1833658	197458	1047897	603207	2145976	1921213	1956641	1846302	2186815	2090387	95757	120930	688789	766554	705050	116301	1	158947	275503	275503	433738	1205689	1	1267454	299844	353769	1	277007	CPD-8124	CPD-8124 [ C10 H10 Mo N5 O7 P S3, tgt=47.28, overall=47.28 ]			(537.8074, 2627.2178)(531.86304, 1686.8099)(532.8597, 1015.3566)(533.86, 190.84)(519.879, 5731.123)(520.88446, 1956.3978)(527.8418, 760.48)(541.11316, 1931.085)(535.36334, 741.32)(534.8668, 939.39)(535.8654, 459.36)(524.6659, 6543.8506)(527.1959, 1003.86755)(528.5155, 993.00494)(529.844, 214.40999)(556.30676, 1980.0343)(556.89374, 1044.5625)(559.888, 497.1)(536.8758, 2366.4946)(537.87805, 1334.70…	13.0938
CPDQT-285	4596440	3844725	2589317	2188856	5383011	5177959	2945486	4833225	2480104	3025479	4335887	1343411	1696960	2435748	3412785	2010188	1380768	11175856	13169678	14791951	11839029	16444261	15607584	6226953	10058977	4782202	11454291	11454291	1582879	10822862	11022036	4774341	4508318	15542185	13962968	6083678	CPDQT-285	CPDQT-285 [ C13 H25 N O6 S2, tgt=96.45, overall=96.45 ]			(357.69333, 5552.881)(359.2557, 8495.935)(356.91898, 45471.168)(357.12253, 8056.537)(358.11783, 5469.56)(359.11917, 570.8366)(338.10876, 38439.973)(339.11145, 5666.9307)(340.11118, 951.35547)(375.0601, 1650.9993)(375.49432, 552.8965)(376.6406, 395.41248)(377.1378, 1192.31)(359.66888, 12954.447)(359.63217, 14635.368)(378.10516, 8716.251)(361.09146, 1850.3907)(365.0847, 1984.07)	10.1534
CPDQT-288	216175	255218	1	397046	1	1	618755	630611	166042	159567	884550	516382	2406451	644274	111976	690827	157782	145313	826774	831122	1122888	1132327	784941	789345	1	1323442	845961	845961	580646	728657	741592	1403754	1	609119	1660547	582006	CPDQT-288	CPDQT-288 [ C14 H26 N O10 S3, tgt=47.47, overall=47.47 ]			(465.0751, 392.86002)(466.07074, 155.405)(467.0727, 76.01)(449.35782, 483.756)(450.0587, 167.91)(451.0589, 171.46)(465.5107, 1027.8242)(451.06882, 646.73)(452.0672, 376.26)(453.0645, 806.87)(483.1115, 17312.71)(485.1126, 2347.6199)(464.95633, 1515.6415)(471.08984, 91602.375)(487.0634, 5223.4414)(488.06717, 773.0616)(469.0497, 109.77)	4.01559
CPD-10037	2721902	2188179	8758533	7568136	3102080	4287158	5244732	1	1	3340978	3197005	7817869	5704538	5063118	4012348	4842329	2962508	5557510	1	1	1	1	1	1	1	1	1	1	1	1	1220733	7552835	9136461	5618255	9784780	5458588	CPD-10037	CPD-10037 [ C10 H14 O, tgt=86.75, overall=86.75 ]			(155.1192, 16940.268)(151.11166, 19104.293)(133.10129, 233768.06)(134.10419, 26510.154)(168.13829, 6135.9062)(152.03397, 3877.5078)(173.09525, 3104.2122)(174.09074, 1642.8674)(155.08249, 2451.8555)	14.0587
CPDQT-280	111144	145993	1	575894	1	1	155381	1	1	166240	186141	1	163996	289756	1	1	1	127862	141746	170171	156158	140336	1	173010	1	1	1	1	110189	1	1	246055	1	1	1	169977	CPDQT-280	CPDQT-280 [ C12 H22 N O10 S3, tgt=40.82, overall=40.82 ]			(437.98248, 1337.7571)(439.16006, 788.85876)(441.032, 1400.14)(422.03333, 1503.5225)(424.026, 242.53)(437.0498, 1240.65)(419.03735, 2959.1316)(420.04385, 496.95)(421.0396, 147.78)(455.07626, 583.61334)(456.0773, 518.43)(457.0755, 563.66)(458.076, 139.88)(438.06512, 1487.12)(441.9599, 1403.4506)(442.689, 289.55334)	1.47733
FMN	381376	336104	284336	270308	262442	257872	301925	259712	431275	299089	291601	266646	274370	313644	289730	231467	269411	253918	102588	217016	172074	200192	119657	143961	145619	163417	170654	170654	105042	120863	1	116799	114166	153864	258035	149281	FMN	FMN [ C17 H18 N4 O9 P, tgt=56.80, overall=56.80 ]			(455.088, 421.7671)(473.12396, 44873.902)(474.12704, 9218.549)(475.12943, 1647.6057)(453.10062, 11448.839)(454.10376, 1707.9958)(455.0903, 219.04)(476.0667, 194.64)	17.1239
CPD-17667	1	1	1	2192825	1	4874040	1	1	1	3183291	1	4147262	1	3184954	1	1613476	1	1	5583058	5125820	4623097	5488865	30104258	7468047	6210274	6200933	3993464	3993464	9020416	8327601	4755668	8005028	5872971	7671913	4392592	7374414	CPD-17667	CPD-17667 [ C17H14N2, tgt= ]			(246.11536, 109987.125)(247.11923, 17675.023)(248.12054, 1520.3901)(249.12773, 19712.05)(251.47131, 13613.605)(251.1385, 6299.0645)(252.14066, 5690.94)(266.53482, 18170.055)(268.716, 16124.708)(269.1673, 16854.969)(270.31915, 1502.9062)(271.21033, 1181.6588)(272.4456, 805.63837)	5.50489
DECOYININE	18065444	16843426	1700179	17087916	17701884	1329712	17261580	17502452	16040493	17729058	17810946	17478786	15950873	16519636	1	16728879	15700771	16276645	2533149	6603379	5963968	4316278	6268324	858581	6408179	6378403	6105738	6105738	5765385	1	5015123	6624753	418907	6667418	5104633	591474	DECOYININE	DECOYININE [ C11 H13 N5 O4, tgt=76.71, overall=76.71 ]			(279.33084, 294113.84)(280.35672, 65661.22)(281.3679, 14177.478)(283.007, 3924.064)(284.10724, 8262.269)(263.19318, 11807.688)(263.0896, 4233.38)(283.69418, 1722.6416)(282.1094, 282.34)(283.1115, 123.26)(262.28928, 5718.2144)(299.8402, 9276.141)(301.75507, 7841.862)(302.1388, 8421.38)(282.33566, 2418.258)(284.03168, 2705.572)(284.1318, 834.17)(307.09677, 1614.5599)(288.75455, 6410.324)(289.0874, …	16.2148
CPD-8120	9974073	5980999	6151132	3844346	10763491	15361074	1160445	1184964	9004300	2024865	6463750	6082918	4885564	1176605	1274767	5801641	11933028	6020702	7048012	7518810	5232542	15036639	7021389	4574477	5559488	1974438	8782142	8782142	16045888	658097	8803294	4344550	4179523	12390138	14936664	3609396	CPD-8120	CPD-8120 [ C20 H33 O2, tgt=69.15, overall=69.15 ]			(305.61472, 119368.68)(306.2504, 24744.875)(307.2427, 15045.14)(308.2442, 490.14)(289.11044, 6818.669)(290.74933, 2593.818)(292.0048, 1695.4675)(292.256, 611.53)(310.76886, 13882.27)(291.0221, 8511.605)(291.9366, 2136.7573)(291.5871, 3511.86)(292.25714, 854.78)(325.63074, 4511.6177)(326.60437, 6397.468)(327.09186, 6315.328)(327.296, 8099.76)(306.70694, 12688.942)(308.36234, 11033.773)(309.15866, …	25.3395
CPD-8122	295063	502345	331114	428190	357490	284702	4142648	319502	5746503	17772772	509632	336394	489175	286996	470144	293958	524548	379136	268457	423446	346369	164800	196593	889892	584309	535581	354496	354496	1	513143	508450	912757	736034	551128	241834	956029	CPD-8122	CPD-8122 [ C20 H23 N10 O12 P2 S2, tgt=67.75, overall=67.75 ]			(727.5429, 982.135)(703.6308, 406.306)(728.0972, 881.4683)(729.05554, 1497.0817)(704.0327, 971.55)(745.2341, 17214.307)(746.2379, 8142.112)(747.15216, 4850.694)(748.0374, 873.1854)(749.03546, 549.08997)(726.02264, 99026.03)(727.0252, 15560.336)(728.00977, 1419.48)	3.86625
CPD-8121	1	1	1	4351950	3584282	2333755	2905184	2979397	2302162	1	1	1	1	1	2608500	2611038	2417821	2484561	3381578	1	1	1	3125227	1	1	1	1	1	1	1	1	1	1	1	1	1	CPD-8121	CPD-8121 [ C20H31O2, tgt= ]			(303.89703, 58861.375)(306.23737, 6808.367)(305.2452, 480.2)(285.21896, 18945.195)(307.251, 5068.7026)(308.2487, 531.875)(287.40292, 4482.1147)(288.2383, 450.7)(323.60513, 5557.0474)(325.27988, 4164.036)(304.59653, 78799.79)(305.2651, 19237.025)(326.22037, 26617.46)(327.23004, 9578.184)(309.2191, 14108.81)(310.2222, 274.54)	26.6448
CPDQT-273	1	366542	1	201226	1	214396	176293	1	317302	268551	288609	1	194520	1	277888	241090	187810	1	1	1	1	1	1	1	1	1	1	1	1	1	158953	1	1	1	1	207743	CPDQT-273	CPDQT-273 [ C11 H18 N O9 S2, tgt=35.02, overall=35.02 ]			(358.0427, 1339.2754)(373.06622, 12970.771)	22.3347
LOGANIN	3965176	5309325	2547729	4208456	3688712	3523278	4197046	4337403	4955294	4269448	2922622	4004322	4695269	5820322	3365895	4403790	1	3523838	2315399	2751629	2981984	2136677	1716318	1434469	2365889	2018777	2332770	2332770	1056250	1493765	1	1807755	2087912	2163990	3008207	1720648	LOGANIN	LOGANIN [ C17 H26 O10, tgt=82.05, overall=82.05 ]			(391.4578, 976.28546)(392.1553, 3472.6304)(393.15613, 569.0231)(373.10977, 2864.3352)(374.2349, 980.1664)(375.14584, 463.91843)(392.66592, 2415.295)(394.1689, 3054.04)(374.82053, 4345.54)(374.1539, 293.36)(408.2921, 5966.7686)(410.1893, 3241.0352)(412.2016, 5464.71)(390.5669, 22826.117)(391.18268, 6884.314)(392.1757, 881.42505)(415.6476, 2358.5588)(414.1535, 1064.2228)(395.1326, 90684.766)(396.13…	10.078
CPD-8138	14467163	4024710	2461602	3525782	3240606	1999164	4774343	3267865	10209341	1770619	2140889	1054957	12145924	2140443	4081065	2381063	20249496	1250482	29684282	46519836	18186102	73647216	10908256	3350779	5195453	3745135	44919440	44919440	12813128	3476586	37508728	834819	4982854	24144904	48251848	3972253	CPD-8138	CPD-8138 [ C15 H10 O3, tgt=99.06, overall=99.06 ]			(238.06322, 13139.109)(220.05307, 1408.3901)(239.07062, 661831.5)(240.07439, 115436.36)(241.07939, 18318.996)(221.05977, 134687.7)(258.1063, 243.89)(241.89154, 28566.4)(242.25029, 3678.4949)(243.10214, 15682.054)(265.06696, 557.52997)	23.8723
CPDQT-277	19817912	43799196	60209952	60375388	8408616	45899224	1	51289892	1	65778200	37972552	63867928	52895704	1	45910384	51298692	1	47569644	26854172	1	13977113	39881836	1	28721448	28924344	29879682	38770744	38770744	41222436	1	14273143	22420032	22143116	39512864	22716504	23324228	CPDQT-277	CPDQT-277 [ C11 H23 N O2 S, tgt=62.49, overall=62.49 ]			(238.14517, 224.2025)(220.1014, 130280.93)(220.1355, 47930.6)(234.15225, 361102.25)(235.16318, 46660.86)(216.14052, 458272.2)(251.17766, 18721.602)(252.1801, 2591.69)(234.2081, 147118.08)(236.0479, 72179.625)(237.04292, 29981.842)(256.47794, 2038.2178)(258.63065, 7856.9224)(238.12495, 2388.9568)(239.1239, 147.36667)(240.1163, 301.74)	28.7421
CPD-8134	14461621	20466902	18053280	23353944	18202906	24544200	20266224	26297584	11583106	26840404	8119075	23518644	4317324	16404873	14345737	9951587	10461603	11504353	34689288	36635352	29974802	36432112	20228212	8428887	5235276	5593248	3564010	3564010	15215526	8650474	24342276	29366936	38091464	40122264	52952776	7369764	CPD-8134	CPD-8134 [ C28 H48 O, tgt=99.49, overall=99.49 ]			(400.4276, 20911.254)(401.86795, 2131.0007)(382.3551, 1347.71)(401.3773, 1205.73)(402.377, 46.515)(383.36725, 205796.14)(384.37088, 63402.258)(385.37378, 9480.517)(386.3725, 600.832)(400.39258, 2578.3213)(401.3796, 312.94)(423.36145, 17008.88)(424.36426, 7157.674)(405.46228, 3478.2253)(406.35425, 1570.8475)	29.7684
CPDQT-274	1	3430083	1646768	195349	2131052	252199	702340	1429644	1762319	2129117	108820	178050	1422252	1637309	1602086	1557878	1733518	304276	1426055	941863	3945210	1593403	2246726	866209	1228106	1957993	1667587	1667587	976421	1	1	1	1222661	972266	1267606	703737	CPDQT-274	CPDQT-274 [ C11H20NO10S2, tgt= ]			(391.9223, 18142.896)(393.3234, 1709.82)(394.05362, 1555.2543)(391.56125, 5458.1104)(378.04968, 288.6)(413.0856, 1036.2806)(414.089, 462.40747)(393.2149, 9960.894)(416.03836, 847.91)(417.0422, 718.5)(419.0366, 3101.56)(396.0315, 740.7475)	17.1759
DIPYRROMETHANE	2070098	1588424	600380	2221307	1964805	1036290	2725180	1828636	1	1968627	2309363	766654	994690	6453691	1667864	887535	1064161	3239265	3583287	1068885	803381	661898	765981	621399	755836	2446483	975232	975232	684631	1123808	734621	10277033	1	11333053	7028475	25135404	DIPYRROMETHANE	DIPYRROMETHANE [ C20 H20 N2 O8, tgt=65.34, overall=65.34 ]			(418.75278, 14611.21)(420.41052, 6543.7583)(420.2964, 69941.32)(400.3676, 7784.54)(401.78897, 1644.8701)(421.59818, 450092.0)(420.133, 1412.98)(422.1451, 2196.19)(401.26828, 14594.89)(401.12555, 4081.8672)(402.1275, 682.5)(435.15726, 12156.825)(435.15375, 2783.5825)(418.45566, 11418.775)(418.55075, 5395.866)(419.1507, 1381.134)(443.12366, 725.9078)(443.62842, 1343.23)(425.47202, 1964.9178)	15.6009
CPD-17650	247556496	1683332	5240037	7410306	194730128	34989224	107673968	37037904	35333616	23406784	7019883	27305504	252446336	60168880	53589136	248184288	71317424	48965480	213767232	256017824	1505099010	53845820	585762820	163727376	72279680	131016032	62935696	62935696	70289568	20155244	51860860	24227490	6092273	53361080	43109484	42556184	CPD-17650	CPD-17650 [ C40 H56 O, tgt=65.35, overall=65.35 ]			(552.4282, 436261.12)(553.4335, 100756.45)(554.4377, 21819.14)(534.5655, 32812.76)(535.8141, 8271.966)(537.34064, 1599.6151)(540.4392, 1035.49)(556.24585, 5368.7783)(555.44836, 4023.75)(556.4452, 6590.72)(537.51843, 9381.504)(539.0721, 10599.81)(541.047, 6533.3716)(541.45276, 1501.81)(571.4715, 602314.8)(572.4748, 238988.31)(555.46497, 661.75665)(556.4771, 110.73)(578.23785, 6151.2974)(579.6334, …	27.3429
CPD-18334	1246241	507804	269078	970831	379435	177958	911902	820583	240664	399120	1222943	1032986	1	995498	500058	353042	1	214381	950622	1	1	1	1014105	962675	173261	1	1	1	1	1	1	1	1	178865	1076470	873024	CPD-18334	CPD-18334 [ C11 H5 O4, tgt=56.29, overall=56.29 ]			(185.01512, 1388.5508)(186.01634, 350.84668)(186.3545, 980.2666)(219.0504, 14397.52)(220.054, 442.92)(201.04352, 32650.473)(202.04819, 2090.2021)(228.02022, 3007.2366)	13.3548
CPD-17651	104500192	233946608	223240320	10421265	35220512	79552408	156404736	36277520	98905328	458654880	52859188	106334464	66833028	41799588	43125040	90135296	19876268	231401504	103725200	187069776	148302272	240769136	248120560	230079152	50873916	60285112	192351280	192351280	324367968	61528512	1	31397220	80747968	75464768	76907192	62956944	CPD-17651	CPD-17651 [ C40 H54 O2, tgt=72.12, overall=72.12 ]			(566.4083, 134905.95)(548.39716, 26633.982)(567.4196, 286106.56)(568.4243, 139706.45)(549.40906, 70664.51)(550.4113, 30522.81)(587.6326, 41603.797)(588.22876, 21231.844)(588.4514, 24049.71)(570.4455, 93201.81)(589.4058, 4606.471)(574.868, 1985.28)(575.4018, 2353.3252)(576.0507, 3546.5725)(577.24457, 5314.13)	29.306
CPD-8131	3291671	9693890	4690247	6641598	4187189	4731130	5963394	4571774	4109879	11889549	7470168	9353015	2870747	18566384	3577561	4938320	3543690	10659433	10939151	17151744	11053946	5099562	4988073	18702030	16357348	19516178	10515970	10515970	7054443	7664311	7430088	15444410	25030864	11569488	15822370	10787959	CPD-8131	CPD-8131 [ C10 H8 O, tgt=86.70, overall=86.70 ]			(147.06487, 34255.633)(148.71576, 14357.688)(149.07791, 22027.54)(129.64642, 58622.734)(130.97311, 37943.016)(163.97652, 3290.2378)(165.09949, 1371.3617)(164.08865, 147.945)(144.08093, 316968.28)(145.08417, 41054.215)(146.07773, 3343.2441)(168.69879, 1599.117)(171.39134, 1785.196)(172.06004, 621.698)(154.05205, 151.86499)	6.69222
ISOVALERATE	31401152	1390313	6474422	13355734	5806424	5327571	3148078	1	3573060	15350905	2614173	4005162	1	1	6935993	8623037	5348945	1	20940292	20939554	20307728	17722536	1	5268160	1	1	1	1	2466874	7364442	1892260	1845678	3184898	1	1751409	3524399	ISOVALERATE	ISOVALERATE [ C5 H9 O2, tgt=74.05, overall=74.05 ]			(101.05964, 21586.799)(102.05787, 764.15656)(104.07098, 4464.2266)(121.60158, 6418.67)(126.0549, 2482.6665)(110.05154, 151.55666)	21.4208
RICININE	1267422	552981	1	1185844	1	1	1	1021082	1	1569064	1	1	828923	2119603	1123462	1929345	1031537	684153	2131146	14465919	1431895	1	17103438	4582382	1	1	804540	804540	2424900	1	1	1623507	2100879	1	1	1	RICININE	RICININE [ C8 H8 N2 O2, tgt=72.15, overall=72.15 ]			(168.11983, 22895.924)(169.07028, 4350.0083)(150.05777, 59435.36)(151.06143, 8214.574)(167.0712, 4426.3447)(150.4403, 19246.963)(149.06006, 124634.305)(182.09384, 1696.92)(165.6405, 151661.67)(166.28766, 29881.719)(189.05347, 2400.1858)(170.79247, 298.1125)	3.05047
4-HYDROXY-BUTYRATE	4246630	1	1098690	2012787	1136488	1	2496203	651449	2555563	419509	3315471	1620865	691339	2494140	1904283	527416	812599	1	558335	1059201	806265	332100	574673	1255788	1668500	1775096	177087	177087	673423	949986	2135648	1	551742	3211508	2013845	9054969	4-HYDROXY-BUTYRATE	4-HYDROXY-BUTYRATE [ C4 H7 O3, tgt=47.61, overall=47.61 ]			(104.29198, 4256.98)(107.303925, 3106.115)(124.07976, 9731.494)(106.000534, 91151.81)(107.07273, 49415.105)(129.62326, 7870.681)(130.28822, 5551.984)(131.0397, 183.23)(110.524284, 3222.6748)	2.89506
CPD-12402	2211892	3100412	2355164	8684100	2239786	1659469	3534462	3745047	6306529	1	1	1	2008526	4937341	4366374	3221191	2695944	12438801	6366329	5952820	3661771	9021875	2407773	1897966	2786771	8104817	3184508	3184508	1521785	1278865	2342890	1	4837961	1	2668530	3346350	CPD-12402	CPD-12402 [ C19 H33 N4 O7 S2, tgt=70.37, overall=70.37 ]			(495.18164, 12545.091)(495.78107, 17598.52)(496.1797, 2286.27)(476.2964, 59933.45)(477.0057, 23624.795)(477.178, 25468.88)(478.181, 2095.26)(495.18457, 74865.21)(496.48813, 17368.62)(498.39307, 38972.324)(498.6907, 27972.945)(500.1939, 114255.59)(476.5105, 14161.786)(477.5132, 2534.5835)(478.1892, 533.54)(512.3487, 35788.62)(513.3077, 49542.113)(514.08923, 50680.02)(515.6731, 16376.507)(516.21655…	19.0806
CPD-12400	5713479	3464141	1	3010565	9794786	2991015	5750725	1901567	4494857	2088347	1	1894983	2056731	6661472	5150160	4291656	1756281	10226817	7876763	7507481	1	7620870	6951717	7710771	1996695	6092137	7257460	7257460	6974981	1843436	4995765	679286	852746	8734151	6839199	7341029	CPD-12400	CPD-12400 [ C13 H25 N3 O4 S2, tgt=58.67, overall=58.67 ]			(354.04068, 6045.688)(354.6261, 2005.1201)(355.128, 1762.94)(333.84344, 25353.416)(334.60266, 3651.4194)(353.4207, 8147.101)(354.554, 2291.154)(355.70633, 292.99142)(357.8815, 665.75494)(358.1304, 846.69)(336.19495, 5449.1987)(338.9993, 5398.9697)(340.1214, 10020.4375)(372.02628, 2773.0505)(373.15762, 228.73749)(353.50153, 1739.8865)(356.15366, 290.37668)(356.1447, 174.39)(357.153, 880.19)(378.30…	8.74855
CPD-9639	1	1	1	12471174	11332918	10675906	1	11168647	1	1	1	1	8497794	1	6283260	8245532	6451121	7028396	9059184	6093072	8059651	1	9160315	12321357	6006839	9392589	1	1	1	9932044	1	10436080	8488819	6975690	1	8196428	CPD-9639	CPD-9639 [ C18H16O8, tgt= ]			(343.08163, 3073.1763)(383.07404, 253999.23)(384.07733, 47726.82)(385.07986, 8365.906)(386.0881, 587.9)(343.14505, 6915.1694)(344.08725, 1504.5527)(378.11853, 22619.83)(379.1225, 5103.7666)(380.1248, 658.86426)(361.09207, 104531.09)(362.0963, 20865.521)(369.0789, 866.36664)(363.49615, 4662.7134)(364.735, 885.1989)(365.1247, 1574.652)	13.7267
CPD-9633	1	1	1	12471174	11332918	10675906	1	11168647	1	1	1	1	8497794	1	6283260	8245532	6451121	7028396	9059184	6093072	8059651	1	9160315	12321357	6006839	9392589	1	1	1	9932044	1	10436080	8488819	6975690	1	8196428	CPD-9633	CPD-9633 [ C18H16O8, tgt= ]			(343.08163, 3073.1763)(383.07404, 253999.23)(384.07733, 47726.82)(385.07986, 8365.906)(386.0881, 587.9)(343.14505, 6915.1694)(344.08725, 1504.5527)(378.11853, 22619.83)(379.1225, 5103.7666)(380.1248, 658.86426)(361.09207, 104531.09)(362.0963, 20865.521)(369.0789, 866.36664)(363.49615, 4662.7134)(364.735, 885.1989)(365.1247, 1574.652)	13.7267
CPD-9631	15110223	64898464	863912	15898141	15500059	5251163	20369100	15401561	33095624	18547820	38556588	16693734	5255310	28119304	9456732	7256995	3829288	11245757	12712799	49355328	9857276	196654752	12083259	36754856	8641419	39931068	24186684	24186684	49247900	37215592	34516552	28493508	12914862	36864540	1	39356136	CPD-9631	CPD-9631 [ C17 H13 O7, tgt=83.94, overall=83.94 ]			(329.06613, 198058.48)(330.06998, 55816.81)(331.07428, 13351.266)(332.07806, 2393.9866)(311.05545, 7723.262)(312.05984, 1421.06)(330.15106, 50373.168)(331.079, 12733.465)(332.08597, 1222.0901)(312.06335, 24361.805)(313.06824, 6092.4136)(314.0721, 556.4657)(347.6038, 771833.0)(348.10583, 144134.44)(349.1086, 14234.919)(350.11252, 1243.4879)(331.76175, 31223.898)(333.95752, 20223.197)(334.1009, 100…	20.2661
CPD-9635	9001370	11068233	4123692	5881895	2926751	7405358	7652167	19505094	4858253	3461353	2885279	1582909	29924106	34494096	27827924	53457308	5020581	39876100	13453429	4450884	11614214	11244672	10000190	460903	1352256	2259193	1279101	1279101	2129597	15414058	16177110	16247939	45764752	1	5107983	10393134	CPD-9635	CPD-9635 [ C35 H52 O4, tgt=62.33, overall=62.33 ]			(538.5951, 5313.6367)(540.1499, 10749.981)(541.54333, 7959.3096)(541.89966, 14860.095)(542.4006, 59915.86)(520.90955, 6430.5186)(521.92053, 7115.4946)(522.78796, 3198.5818)(523.39374, 3158.9058)(539.0452, 4110.7446)(540.1328, 7619.069)(541.12146, 4856.6226)(541.73944, 6025.5137)(542.4027, 5145.6553)(522.8107, 4018.8633)(523.1091, 4729.7783)(523.8952, 9874.165)(523.401, 1201.7)(556.0335, 20885.914…	28.0799
CPD-19751	1	540290	8937735	9991074	3869322	2849012	14078184	7870169	6322764	10202363	700480	10425511	4629815	29474364	9545922	9536139	3279041	9823046	6123656	5949573	371070	121414	3980022	8351541	8238938	1	5894226	5894226	3224347	9094941	3653601	13765840	8950144	5662585	4207335	1	CPD-19751	CPD-19751 [ C6H5NO, tgt= ]			(111.7771, 46480.26)(108.56624, 1573.7478)(125.07114, 138001.94)(126.06915, 19566.232)(127.07381, 390.105)(109.064766, 1840.3125)(133.00139, 15999.628)(133.85957, 3841.1526)(134.0365, 286.99)	2.69472
CPD-17646	43024540	1	1	9784582	11881794	6810907	3818362	3743259	12517002	28115546	35682828	1	11930772	12668090	10879365	11409136	1	3226932	2003951	13031303	8104054	1	1750184	1	2893714	3021990	2742557	2742557	1635877	18271398	16171674	1	2846979	28050578	2461641	17335340	CPD-17646	CPD-17646 [ C18 H29 O5, tgt=71.98, overall=71.98 ]			(327.39798, 20463.428)(326.20825, 626.0)(307.2629, 86896.57)(308.36002, 22339.266)(312.207, 26322.77)(329.93442, 145448.75)(331.22284, 52240.535)(310.06702, 11980.062)(311.30338, 13319.653)(311.89948, 21608.01)(313.21408, 11079.757)(343.51303, 103311.22)(345.23657, 1937.4332)(326.15198, 9191.514)(327.48032, 10050.655)(328.23022, 7368.3975)(350.5832, 16238.797)(351.34482, 2292.7827)(352.2026, 344.…	19.701
CPD-19753	3309021	1	2308094	888615	2522837	834382	1243727	2950220	667424	1228366	964100	1344125	2689454	575787	1079149	1983909	4144751	1640558	5606500	8039997	4051857	12308452	2817653	1442470	1362829	980235	7935303	7935303	3043721	2848732	6198819	1184656	1247025	4639297	7965737	1	CPD-19753	CPD-19753 [ C8 H13 O8, tgt=83.89, overall=83.89 ]			(238.20001, 13194.75)(220.32697, 2249.5764)(239.87221, 809802.25)(240.07442, 186132.42)(241.07878, 24571.758)(221.40419, 140065.58)(223.06587, 1512.3)(256.43384, 6355.182)(240.75952, 4015.7605)(242.09947, 1433.9584)(260.51608, 20152.71)(261.34134, 3219.2097)(262.65424, 24901.678)(264.0579, 10233.16)	14.704
CPD-17644	8294702	5629273	8462815	31358008	18337188	6236589	2584019	6632371	5822281	7200257	1693323	5987434	4218546	5159783	8807340	3093981	5167923	6489036	6520851	9561899	1819675	12500125	4994220	2305944	1630454	4931290	1525373	1525373	18682760	2762662	13328833	6752654	2732078	21794504	3101707	14335314	CPD-17644	CPD-17644 [ C18 H36 O2, tgt=98.76, overall=98.76 ]			(286.2748, 551.36)(268.15674, 5738.328)(269.1666, 2677.367)(270.2728, 1045.09)(288.28903, 1186.98)(270.15903, 7187.174)(271.28214, 4668.055)(272.2851, 1177.4)(302.54105, 9543.423)(303.30792, 8489.577)(304.3029, 4031.49)(284.29504, 187177.27)(285.29843, 34886.703)(286.30188, 3291.854)(307.26132, 3468.9836)(308.2648, 2708.9)(290.6743, 2502.1921)(290.65433, 817.692)	26.9482
DICOUMAROL	610648	1417737	609543	561681	584892	471311	416017	841102	1151502	867369	517860	356530	492194	958758	993256	763489	553141	592259	121872	1247077	344356	214409	282790	227466	828168	424685	138136	138136	295887	140248	194446	1	216433	119208	367536	181647	DICOUMAROL	DICOUMAROL [ C19 H12 O6, tgt=71.03, overall=71.03 ]			(336.60315, 12988.837)(337.56796, 2718.1104)(319.0604, 4719.27)(322.0633, 1561.34)(337.59213, 12361.337)(338.073, 2612.5308)(339.07916, 155.88199)(319.8644, 9069.304)(322.07745, 3009.2349)(354.75516, 10708.195)(356.27032, 1123.611)(359.1132, 1548.9156)(337.46542, 24468.094)(338.09528, 3799.5916)(339.34106, 1394.8674)(361.0533, 5800.219)(362.5602, 486.125)	17.2805
CPD-17645	53457456	13785598	17747342	27410038	21615508	22457230	28459484	25940280	58537256	12726896	12868489	4957964	53245824	25139984	31902518	23466900	21662884	3545468	22550404	33424008	63887648	1	56870156	34692916	17784360	25627866	1	1	53851272	17114494	31288208	6578687	23534286	24756018	34018768	1	CPD-17645	CPD-17645 [ C18 H27 O5, tgt=86.44, overall=86.44 ]			(326.36813, 7397.8477)(309.63272, 4759.5605)(309.684, 1250.98)(326.30927, 3415.3098)(308.49854, 12238.498)(310.19223, 3337.4976)(342.7924, 47871.19)(345.49805, 59671.2)(325.15048, 17658.379)(325.75214, 25648.83)(328.1633, 1456883.8)(329.847, 91764.8)(330.16995, 28843.734)	23.9075
CPD-17642	2073038	1479377	2621565	3228619	3005031	1744238	2515141	1937683	2629436	3855147	1292925	1633629	3225486	4593213	1699466	1506118	1724317	1332846	1487717	1664631	2201831	2925718	3106226	4584913	7406149	10612477	2033357	2033357	3143337	6130294	3546708	13631639	3886119	590153	1807203	3036316	CPD-17642	CPD-17642 [ C16 H34 O2, tgt=70.94, overall=70.94 ]			(242.24803, 55802.38)(243.32286, 10422.78)(244.25401, 850.09906)(258.2796, 15960.962)(259.28278, 2575.4167)(282.99304, 3419.9023)(284.6544, 2014.386)(263.2371, 101442.49)(264.24078, 20234.422)(265.24786, 7034.8003)	26.3026
CPD-17643	530681	285613	2701276	7164147	1607470	1	3306034	388417	2148868	515267	276594	512427	893909	7546595	2069884	231024	364203	208415	484905	540224	889174	529701	513136	653417	6164449	863144	399106	399106	203848	447028	391174	1	1728984	358239	1	1	CPD-17643	CPD-17643 [ C18 H38 O2, tgt=55.12, overall=55.12 ]			(270.27957, 13787.408)(271.28244, 2920.6658)(272.2857, 720.975)(286.30984, 2954.4802)(309.99957, 6210.887)(310.6823, 721.36804)(291.4245, 3924.3035)(292.27042, 1265.2423)(293.2812, 536.99)	27.4392
CPD-17640	1469285	5664130	3029545	1130052	1726048	3187077	2180359	1307844	2963373	1881539	2292366	4523968	3765136	768262	2607511	1466522	3978962	2838841	2022889	1949901	2575426	1976098	1305141	2009736	759396	1154293	1199038	1199038	1097984	1084044	922002	1	901338	808626	721309	936184	CPD-17640	CPD-17640 [ C18 H35 O3, tgt=86.32, overall=86.32 ]			(301.59445, 21244.223)(283.08636, 1400.875)(285.5951, 620.68)(284.47357, 1849.9437)(322.3094, 1808.4)(303.5699, 2010.934)(302.2908, 130.42)(323.59723, 7209.7783)(323.25558, 1392.3152)(307.24802, 207408.69)(308.24887, 48798.316)(309.2496, 7115.084)	22.7713
CPD-17641	24137904	5932512	10340050	13884468	10869668	1211483	18825236	123542	245131	1	13081764	5965970	20018284	1	5273334	133187	2686662	3678917	18455190	8650296	2465673	4150471	201525	283643	10756312	192486	1	1	3157980	1	1	397922	10073026	1	1	4350166	CPD-17641	CPD-17641 [ C39 H66 N7 O18 P3 S, tgt=52.29, overall=52.29 ]			(1045.852, 131.36)(1047.3478, 790.19)(1028.1321, 640.3125)(1030.6705, 633.9634)(1031.541, 2214.8638)(1031.3425, 4736.04)(1033.3317, 1455.68)(1034.3291, 1078.7)(1046.8519, 684.52)(1049.3556, 150.75)(1048.3547, 19.69)(1049.3599, 30.07)(1051.3687, 22.01)(1052.3612, 22.2)(1029.5049, 796.90594)(1030.8411, 498.28754)(1031.0107, 377.1433)(1065.3733, 280.752)(1070.3691, 217.01)(1046.1984, 1505.165)(1068.…	25.5016
P3I	1	1	226384	297437	188568	1	382991	290235	299480	243942	464107	1	1	411972	299896	485825	1	401610	530824	1	1	1	1	1	279599	1	1	1	1	1070543	1	1	1	1	1	1	P3I	P3I [ O10 P3, tgt= ]			(256.8763, 127.48)(254.88097, 683.85004)(256.8879, 572.32)(273.9056, 229.89)(256.5675, 193.85222)(278.87112, 164.4291)	1.37496
CPD-10081	649426	605708	517598	894239	296087	393766	646789	488665	816304	1314945	852776	346655	540786	735010	366072	280231	488619	478567	356791	454541	1541873	326907	596512	978149	487695	1029378	543284	543284	475266	693513	2513221	564137	3833651	2821025	450570	706460	CPD-10081	CPD-10081 [ C26 H25 O13, tgt=94.11, overall=94.11 ]			(545.5282, 12008.067)(546.1327, 4246.8794)(547.13385, 775.3301)(533.131, 437.4)(547.0599, 24930.057)(548.14825, 7507.4224)(549.1514, 1621.7356)(565.31946, 2720.142)(566.3459, 623.0535)(567.17, 449.84)(547.3608, 8919.464)(548.3299, 3330.2559)(549.2509, 1102.3718)(550.1619, 106.4)(570.41364, 5252.899)(570.13226, 1471.3232)(571.1308, 168.32)(553.1176, 245.05333)	13.4416
DETHIOBIOTIN	6310792	6829387	6964858	4265252	1	3462847	3744295	2570754	5822396	8304255	8595132	6485168	2214055	1583624	2360599	1512647	1844019	1445813	2730043	3103823	1756284	3680894	1022933	1588097	1549278	2314645	1136065	1136065	1122521	746439	1753010	1	1558598	11648567	11933582	1712520	DETHIOBIOTIN	DETHIOBIOTIN [ C10 H17 N2 O3, tgt=82.40, overall=82.40 ]			(213.7138, 55248.297)(196.73349, 13421.996)(199.29616, 25119.238)(200.12639, 32872.234)(234.72633, 107554.04)(235.7297, 75034.62)(236.16745, 84643.0)(217.15607, 749925.5)(218.15948, 94826.414)(238.78432, 5393.355)(222.42386, 11955.874)(223.11618, 2618.2407)	24.6781
CPD-15300	2087320	1	1	962468	1594416	1401975	1346637	869450	1	507900	2935199	920879	560974	1	1546990	2037142	614150	1	256286	953064	269560	1	323650	1	1684127	1	4546960	4546960	218169	591267	2161626	1	216767	232186	221704	1993255	CPD-15300	CPD-15300 [ C33 H31 N2 O15, tgt=63.71, overall=63.71 ]			(697.1773, 3512.0667)(698.18066, 1003.13336)(677.1524, 547.53)(697.189, 9200.3955)(698.1919, 3486.4622)(699.1941, 833.27826)(695.1941, 5261.7896)(696.1962, 2766.858)(719.1599, 78109.85)(720.16364, 40948.21)(721.16614, 10734.744)(722.16846, 2187.945)	21.6448
CPD-17633	388956	313890	330832	883866	178863	701937	488916	111649	322727	161879	117322	142635	167448	1	140714	172999	807673	170280	1	160921	1	140403	139682	1	133868	1	1	1	162097	1	1	1	1	1	186390	175780	CPD-17633	CPD-17633 [ C43 H72 N7 O18 P3 S, tgt=48.15, overall=48.15 ]			(1100.2448, 1179.0109)(1101.6267, 646.6159)(1102.6417, 255.18501)(1086.642, 299.02502)(1088.3912, 285.62668)(1101.9409, 918.90894)(1104.3877, 707.645)(1086.8953, 313.41998)(1088.394, 287.405)(1119.3033, 546.9692)(1120.9312, 1298.135)(1122.0986, 1981.7451)(1122.8263, 3295.3738)(1123.4386, 890.58)(1124.4198, 1801.21)(1104.4281, 279.83252)(1124.3715, 345.31)(1104.3715, 727.4348)(1105.3721, 277.13834)	3.69943
CPD0-2038	1	1	1	457850	1	1	1	1	1	1	350456	1	1	1	1	1	1	1	1	1	1	1	1	1	1	1	1	1	1	1	1	1	1	1	1	1	CPD0-2038	CPD0-2038 [ C4 H3 F O4, tgt= ]			(153.0401, 841.175)(155.0434, 525.435)(156.04239, 7086.13)	8.89465
P4I	1	1	1	122238	1	1	1	125485	1	1	1	177820	1	1	1	1	1	1	1	1	1	1	1	1	1	1	1	1	1	1	1	1	1	1	1	1	P4I	P4I [ O13 P4, tgt=47.06, overall=47.06 ]			(336.84402, 908.82666)(335.86108, 2559.8333)	1.55618
CPD-12404	17304844	38297576	51568396	26514632	47139904	47133124	46024944	44820332	47339268	7198707	32468136	17008676	45199644	43289712	43562564	45769388	44492864	42336336	22413472	25038038	20571900	23517114	49824376	1	1	33556344	33792052	33792052	42132236	1	19843020	1	14365794	1	32424648	27086674	CPD-12404	CPD-12404 [ C10 H21 N O2 S, tgt=69.89, overall=69.89 ]			(224.03287, 36132.066)(206.11896, 12023.6045)(220.1359, 140188.27)(202.1249, 440723.44)(203.12851, 39342.137)(239.4698, 11097.298)(240.5399, 8087.651)(220.15439, 271041.16)(223.01498, 34459.66)(242.72888, 6139.3027)(244.115, 35146.0)(225.10515, 1011.2307)(226.1047, 5903.27)(229.1107, 103.43)	26.9079
LOGANATE	16705938	13211711	11450336	12903608	11951217	14385928	2010450	1	12926590	1763341	11210145	16881608	15314322	1	1	13401115	1290246	14947181	1331978	1377159	1323733	1470182	1280250	1	1203848	1570430	1392845	1392845	1049382	844694	1580732	1	14927218	14448976	1609891	7616562	LOGANATE	LOGANATE [ C16 H23 O10, tgt=74.86, overall=74.86 ]			(378.2728, 3603.8376)(379.22095, 5785.492)(380.04095, 877.7601)(380.1363, 676.88)(358.01733, 5057.0474)(359.08795, 4520.7974)(361.1264, 15581.03)(362.12866, 3008.2815)(377.54327, 4827.04)(378.6474, 289.09)(359.1282, 2219.7651)(397.17078, 5447.2817)(398.1767, 189.77)(375.14908, 388932.5)(376.15048, 74758.46)(399.12732, 227.51)(380.2221, 39090.21)(381.10632, 8338.529)(382.11133, 663.02454)	12.7588
S-ADENOSYL-4-METHYLTHIO-2-OXOBUTANOATE	8111527	11757609	2649908	4376339	6387452	6674143	6381443	4413552	2379525	8618150	10744639	5620080	7257015	1	7396944	6388524	7670584	1385795	3992281	4274986	4305827	4782480	3740533	3157242	1	2220944	5352452	5352452	2424636	3695063	3964547	3637461	1	1	5113401	2661090	S-ADENOSYL-4-METHYLTHIO-2-OXOBUTANOATE	S-ADENOSYL-4-METHYLTHIO-2-OXOBUTANOATE [ C15 H19 N5 O6 S, tgt=88.20, overall=88.20 ]			(400.994, 3439.1162)(401.9431, 1224.9017)(402.1178, 2058.26)(403.12076, 3545.2344)(403.7894, 1795.3734)(381.3591, 17004.81)(382.3705, 11338.434)(384.63406, 75853.84)(386.1127, 20117.977)(415.24387, 129386.83)(416.1403, 23291.156)(417.14545, 2859.926)(398.2381, 1250.3982)(399.12524, 6925.4575)(400.12646, 1106.504)(425.10297, 305.07)	17.1225
CPD-12405	28080692	5399060	29939254	32685890	6378456	18619296	26088580	26253756	1036223	28240362	30941446	28119790	22637678	21629466	19671388	4971527	21342432	22290298	22994596	13202025	1	16141784	19622416	22595452	1	13247538	15476733	15476733	10327035	16120179	17695040	22018620	16795228	14694707	1	24969998	CPD-12405	CPD-12405 [ C20 H35 N4 O7 S2, tgt=90.42, overall=90.42 ]			(508.32504, 3049.0588)(509.5956, 3052.388)(513.1878, 3175.54)(489.48523, 9409.843)(493.0188, 10763.888)(495.18213, 51023.992)(508.3471, 4992.8096)(512.2065, 917.95)(513.208, 4346.22)(490.19257, 53234.99)(491.1984, 14904.9375)(492.1832, 6211.47)(493.1763, 401.33)(526.5192, 287362.06)(527.2315, 92422.81)(528.23193, 32417.977)(529.3518, 6817.398)(530.22906, 2590.3076)(508.76434, 7621.9565)(510.4698,…	11.0051
CPD-12406	6419755	2319581	2959960	5957032	4481341	5572524	8621748	5933559	3629802	11015519	7150145	6933227	7311871	8368070	4992694	6327455	5766519	4790637	6205971	4439717	8335218	10141320	5715117	3436001	4308711	3778096	4665217	4665217	3161140	4342371	3733820	2226772	7124623	5541503	5406647	3547298	CPD-12406	CPD-12406 [ C15 H29 N3 O4 S2, tgt=73.52, overall=73.52 ]			(379.15747, 59648.17)(380.2176, 9560.496)(381.16226, 2250.8337)(362.1169, 13398.368)(363.2017, 11588.772)(366.15112, 320.35666)(382.57108, 7102.534)(383.1705, 3833.2852)(365.52118, 4100.013)(366.6047, 3682.612)(367.50983, 1642.0676)(368.1561, 482.14502)(398.1419, 10456.027)(400.66058, 31521.188)(401.1923, 2103.37)(401.1922, 5909.19)(380.89008, 9634.013)(383.1783, 3388.64)(404.2375, 4607.807)(406.…	7.96747
CPD-12420	130643	248046	1	145010	103670	153305	125488	1	220330	187883	198498	136870	133847	185422	163442	161941	115882	112596	124095	433156	231098	424965	291538	132754	191662	130138	181446	181446	156591	185767	329294	1	307931	305331	412604	127598	CPD-12420	CPD-12420 [ C18 H24 N O11 S2, tgt=57.79, overall=57.79 ]			(497.08542, 3570.4724)(496.08984, 1405.31)(477.07947, 277.06)(513.87354, 4279.4214)(515.39655, 3214.2722)(518.1177, 12846.733)(500.10513, 3430.348)(519.06805, 493.53375)	15.1956
GERANIOL	14485072	12017308	18450568	7107987	6830705	4982605	8523425	6062648	7770418	11339979	13710029	4436603	7318875	5505989	7149028	3681196	4685874	7136051	9006954	10457327	8807202	13022958	5994102	5719344	7431932	10756685	10898973	10898973	9923830	6917554	11214140	1	1	16195141	10492654	5197784	GERANIOL	GERANIOL [ C10 H18 O, tgt=99.40, overall=99.40 ]			(156.1399, 5996.51)(156.61778, 2431.2122)(137.13234, 389376.8)(138.13525, 39632.23)(139.13808, 2024.7365)(154.15894, 36086.938)(155.16217, 3947.526)	19.3511
CPD-9618	8733513	19397196	3637080	6168485	7013745	7338619	6349500	4494508	13231247	9702937	18298934	6138544	7183656	7007754	8315844	8711471	6984271	10981472	24190584	22563676	43354328	43661936	56597816	35620540	41298420	26021130	46009760	46009760	40760536	26849436	37497260	16213622	34347676	28398684	35207896	36251124	CPD-9618	CPD-9618 [ C16 H12 O5, tgt=98.96, overall=98.96 ]			(285.07642, 1086169.1)(286.07968, 181984.1)(287.08215, 25912.293)(288.08627, 880.78564)(271.0794, 1269.16)(302.98895, 1211.1184)(304.96826, 223.99857)(309.24756, 2753.7341)(312.07468, 1027.8761)	21.8532
CPD-12423	188466	149171	164426	120289	117019	149657	184922	141017	131937	139279	443274	175611	177051	171307	125456	187078	182854	162118	1	1	1	1	1	159744	1	1	1	1	1	1	1	286908	126272	1	1	263509	CPD-12423	CPD-12423 [ C22 H28 N O14 S2, tgt=52.62, overall=52.62 ]			(601.0908, 221.45)(577.6842, 5369.6426)(578.146, 939.42944)(581.0911, 260.39)(580.2877, 1596.626)(578.0868, 1044.7)(613.137, 294.64)(595.1269, 771.5366)	13.7815
CPD-12422	1	138647	106266	180833	108431	1	1	1	1	103335	182343	110424	1	182794	1	1	1	1	1	1	1	1	1	1	1	1	1	1	1	1	1	118404	221991	1	1	107341	CPD-12422	CPD-12422 [ C22 H30 N O14 S2, tgt=19.63, overall=19.63 ]			(579.1014, 217.9)(615.153, 6233.3784)(617.1548, 502.546)(601.0863, 1137.831)(602.0858, 711.45)	4.70847
CPD-9616	2187831	24923376	2299984	9468599	3159524	3124993	3848045	2863996	19980214	10206057	7373132	8272272	27177144	16069670	17009308	12986405	3547049	5053807	5573461	5875195	13743498	13944879	23514632	9782978	11990934	16524266	15962745	15962745	6262540	5624539	6791347	18828632	28323762	31443710	50676560	6994506	CPD-9616	CPD-9616 [ C17 H14 O6, tgt=99.01, overall=99.01 ]			(314.07867, 260739.78)(315.08304, 62797.824)(316.08572, 9385.446)(317.0878, 598.90643)(296.30405, 75344.97)(297.19766, 14988.909)(298.07578, 1995.5447)(299.08972, 367.845)(315.08694, 457297.84)(316.09003, 79987.99)(317.0934, 12267.886)(318.09775, 981.5733)(332.59604, 175437.69)(333.5597, 32504.898)(334.11603, 1963.0974)(317.69598, 1328.6257)(337.48242, 2802.432)(338.07343, 1929.51)(321.0591, 111.…	21.3895
CPD-12421	1	288774	1	763012	1	1	1	1	1	673161	1	1	1	1	1	1	1	1	1	1	1	1	1	495182	1	524997	1	1	1	608354	1	377700	537431	1	1	1	CPD-12421	CPD-12421 [ C18 H22 N O11 S2, tgt=45.03, overall=45.03 ]			(497.0693, 3460.735)(496.49863, 3431.26)(498.0725, 374.73)(476.0643, 601.42)(513.59106, 669.45)(519.05023, 121.67)	12.7041
CPD-9617	808611	1	1	744146	1	1546332	716350	685665	1	1215341	1	1	1	647867	1	1	1	743788	1	2882251	4172109	3449990	4470469	1	3318446	1369342	4334110	4334110	1	2621040	1	1	1	1	1	1	CPD-9617	CPD-9617 [ C16 H12 O6, tgt=97.87, overall=97.87 ]			(300.0629, 921.88)(301.07123, 80693.31)(302.0744, 13529.548)(303.07654, 2022.8058)(283.0609, 882.8)(318.10052, 4026.214)(319.10284, 295.97336)(302.59518, 308.07498)	18.9777
CPD-10077	3216705	6553546	5567454	12922587	10376281	8217109	9670718	22384124	1831307	12706454	1893496	11081148	5626711	2020247	5831361	9022132	11090394	1463376	11211310	3932543	2756840	9295356	4365838	1	6935858	4401190	2870844	2870844	3794853	3411414	2989581	1	1	7214151	11123631	10120411	CPD-10077	CPD-10077 [ C23 H24 O10, tgt=49.92, overall=49.92 ]			(462.00912, 6536.6245)(462.99896, 8853.014)(464.1457, 6873.605)(466.1589, 2423.59)(447.80603, 1097.69)(462.54657, 3809.086)(463.1549, 1325.21)(448.98483, 602.84)(481.55078, 231905.88)(483.187, 74542.11)(463.23773, 3501.704)(463.8652, 1646.6484)(465.1801, 216.41)(488.46976, 815.0367)(489.1362, 1490.07)(465.86908, 1268.74)(468.1202, 165.01)	15.6835
2-AMINOBENZOYL-COA	175074	135093	136942	143547	1	1	1	156853	1	368425	1	223850	525335	1	371620	167969	161542	144570	1	1	1	1	1	1	1	1	168796	168796	1	1	1	1	1	150285	1	1	2-AMINOBENZOYL-COA	2-AMINOBENZOYL-COA [ C28 H37 N8 O17 P3 S, tgt=18.43, overall=18.43 ]			(867.1008, 1181.71)(910.1234, 1608.6952)(911.1255, 157.94)(888.1102, 3234.4768)(889.1116, 845.725)	28.0666
CPD-9610	87718472	1102687	1679618	81686776	52872460	1	61067024	2012158	51626540	19422592	5837995	144261392	1	8786260	4663144	27852164	3128751	979919	4528930	2564032	19627408	4108290	5418311	4089490	20643788	14473956	7745224	7745224	11821179	18978724	1	25252288	15662942	12090847	42151616	1	CPD-9610	CPD-9610 [ C50 H81 O7 P2, tgt=70.60, overall=70.60 ]			(859.37646, 43520.387)(859.1778, 20878.227)(859.0495, 14136.574)(859.5689, 15003.11)(860.5666, 57261.53)(861.5696, 29377.61)(840.5431, 17592.951)(841.8736, 6682.0796)(841.87866, 15792.547)(841.5503, 12678.8)(842.5565, 7827.77)(843.5583, 3875.07)(860.67914, 146468.23)(861.1492, 134256.52)(862.0256, 73201.32)(861.5718, 30786.865)(841.8814, 14335.413)(843.11646, 92044.36)(843.55975, 32534.83)(842.55…	28.0388
CPD-17623	146057	185836	262151	874546	670265	648475	726974	1226604	1	1	2117088	2017585	550945	1	1	1	1	1	1	1	1	1	1	1	1	518049	412484	412484	594964	1	1	1	1	1	1	1	CPD-17623	CPD-17623 [ C39 H62 N7 O18 P3 S, tgt=58.14, overall=58.14 ]			(1028.3186, 292.55)(1046.323, 852.52)(1028.3209, 497.28833)(1030.3203, 382.85)(1031.3236, 207.82)(1065.3376, 444.57)(1042.1407, 1062.7019)(1043.3395, 1566.482)(1046.3502, 405.03662)(1045.3473, 3850.57)(1046.3467, 263.94)(1047.3453, 1578.8)(1048.3423, 273.77)(1069.319, 833.568)(1070.3191, 45.96)(1071.3206, 338.2)(1052.5596, 3134.6042)(1053.3094, 8080.414)	20.0797
GLC-D-LACTONE	1218511	1043603	1035456	1141009	939479	1253724	1057036	821800	1215851	804862	866876	1082142	1083229	1329382	1092012	1225050	1304061	1211686	1	1	1	1	1	1	1858538	1391992	1	1	1	989076	1	817325	1	1	1	1	GLC-D-LACTONE	GLC-D-LACTONE [ C6 H10 O6, tgt=80.37, overall=80.37 ]			(179.93901, 430.99667)(161.04114, 2453.205)(179.0532, 27248.15)(180.0582, 3147.28)(164.87177, 7280.9907)(166.0582, 7889.37)(196.125, 4254.6406)(198.0839, 1712.9)(181.28918, 2028.3575)(182.08076, 1352.7234)(201.03781, 59844.375)(202.04057, 7237.2417)(203.03471, 2123.1443)(188.0389, 2030.9601)	15.7338
CPD-17621	1477998	1295530	1308456	246716	137865	178697	1704758	1172329	758629	972435	2232735	1195473	1	412312	1175643	780355	566365	619534	826023	1308719	908016	749415	275163	308253	334417	252548	394387	394387	721755	311410	563867	812375	927452	903491	454640	430260	CPD-17621	CPD-17621 [ C37 H62 N7 O18 P3 S, tgt=71.09, overall=71.09 ]			(1017.774, 3192.3328)(1018.31104, 406.16162)(1001.3074, 8897.63)(1002.31006, 14297.144)(1003.9741, 1743.9933)(1005.6406, 4803.1035)(1006.3092, 6662.045)(1020.09094, 520.37)(1021.5726, 1080.4425)(1001.3079, 21298.137)(1002.3104, 40306.85)(1003.45135, 2447.8542)(1004.8776, 5460.9126)(1005.7692, 11736.701)(1006.7242, 8577.111)(1007.3053, 7435.9375)(1039.3528, 527.81995)(1040.8485, 252.825)(1017.408,…	28.5822
CPD-17627	1725418	1511417	1	875112	133723	555082	1110397	1244301	1	1703601	2535034	2092858	124869	744659	782134	1	518425	1	325914	595782	1	1	1	1	284672	462094	1	1	1	1	503795	410967	419203	104369	148991	1	CPD-17627	CPD-17627 [ C37 H62 N7 O19 P3 S, tgt=53.63, overall=53.63 ]			(1038.3254, 997.48)(1019.76404, 2342.9346)(1021.97626, 421.93002)(1022.3099, 768.32)(1038.3301, 1464.855)(1016.5915, 10864.593)(1017.7519, 2259.4895)(1019.9095, 1128.1381)(1055.3381, 565.97754)(1058.347, 1483.7734)(1034.5327, 1173.53)(1034.3317, 471.88168)(1059.198, 4334.63)(1060.641, 2021.81)(1062.3044, 691.98334)	28.4054
CPD-17624	1915318	1549509	1816214	944079	731198	693318	1238713	1309867	1	1014848	1443366	2243544	741214	1	658496	1	1	1	1054595	618890	1	1	1	1	476312	1	1	1	1	1	1	1	1	1	1	1	CPD-17624	CPD-17624 [ C39 H61 N7 O19 P3 S, tgt=30.15, overall=30.15 ]			(1057.1218, 2041.8011)(1058.8788, 3280.1914)(1061.3108, 2188.4402)(1061.3109, 1123.51)(1063.3005, 208.045)(1059.3021, 4413.6313)(1060.4725, 385.21667)(1061.3096, 336.22668)(1074.338, 9727.035)(1075.3398, 1770.86)(1056.3135, 1439.5701)(1057.3201, 200.27)	30.3335
EDTA	9622569	659377	1	4978260	337659	3999407	1	2668907	696329	1415876	1	1	6044905	311110	1	381886	1	487041	880630	956562	1408218	1217202	960512	664609	1014418	1264174	1160495	1160495	8575831	1093664	690874	479157	1100082	783107	1269909	1140860	EDTA	EDTA [ C10 H14 N2 O8, tgt=72.17, overall=72.17 ]			(293.0846, 9068.3125)(272.06387, 53280.02)(273.06662, 7010.622)(274.06564, 678.76)(291.08417, 91803.34)(292.08823, 11064.245)(277.0849, 5986.34)(312.23044, 3349.2253)(313.12018, 3309.405)(293.86984, 2260.98)(294.7731, 4165.65)(314.71805, 2084.3098)(315.068, 9188.2)(317.07, 661.6)(297.30896, 1248.715)(297.057, 10056.06)	13.4078
CPD0-2021	1	492633	1	251307	1	1	170562	139527	527649	111355	147948	127119	1031254	292059	1	1	1	1	1	1	1	1	1	1	1	1	682282	682282	1	1	1	1	2781921	1	1	1	CPD0-2021	CPD0-2021 [ C6 H8 N3 O8 P2, tgt=46.96, overall=46.96 ]			(313.98892, 3273.5798)(314.98956, 750.18427)(315.9881, 259.88)(331.01315, 2719.7634)(336.25702, 826.61285)(316.95996, 409.205)	12.409
CPD0-2022	1	1	1	201502	1	1	1	1	1	1	1	1	1	1	1	1	1	1	1	1	1	1	1	1	1	1	1	1	1	1	1	1	1	1	1	1	CPD0-2022	CPD0-2022 [ C12H16N4O8P2S, tgt= ]			(440.0327, 643.61)(441.0282, 3645.48)(442.0231, 569.79)(443.0256, 295.82)(445.0315, 3148.26)(438.0403, 174.81)	1.467
CPD0-2026	32017572	50759896	7854645	15737627	1	22217954	20070506	15120495	1	50705500	38799880	16246433	24044440	27415102	21936584	26845824	27925240	11123248	1	1	1	1	1	1	1	1	1	1	1	1	1	1	1	1	1	1	CPD0-2026	CPD0-2026 [ C10 H12 N5 O6 P, tgt=83.40, overall=83.40 ]			(315.0504, 107449.72)(316.05374, 17099.184)(330.07364, 51158.203)(331.07895, 12231.452)(332.08304, 1438.7832)(338.0357, 563.495)	17.2591
CPD-9627	808611	1	1	744146	1	1546332	716350	685665	1	1215341	1	1	1	647867	1	1	1	743788	1	2882251	4172109	3449990	4470469	1	3318446	1369342	4334110	4334110	1	2621040	1	1	1	1	1	1	CPD-9627	CPD-9627 [ C16 H12 O6, tgt=97.87, overall=97.87 ]			(300.0629, 921.88)(301.07123, 80693.31)(302.0744, 13529.548)(303.07654, 2022.8058)(283.0609, 882.8)(318.10052, 4026.214)(319.10284, 295.97336)(302.59518, 308.07498)	18.9777
CPD-9628	808611	1	1	744146	1	1546332	716350	685665	1	1215341	1	1	1	647867	1	1	1	743788	1	2882251	4172109	3449990	4470469	1	3318446	1369342	4334110	4334110	1	2621040	1	1	1	1	1	1	CPD-9628	CPD-9628 [ C16 H12 O6, tgt=97.87, overall=97.87 ]			(300.0629, 921.88)(301.07123, 80693.31)(302.0744, 13529.548)(303.07654, 2022.8058)(283.0609, 882.8)(318.10052, 4026.214)(319.10284, 295.97336)(302.59518, 308.07498)	18.9777
CPD-9629	1	24923376	1	9468599	1	3124993	1	2863996	1	10206057	7373132	8272272	1	1	1	1	1	1	5573461	5875195	13743498	13944879	23514632	9782978	11990934	16524266	15962745	15962745	6262540	5624539	6791347	1	28323762	1	1	6994506	CPD-9629	CPD-9629 [ C17H14O6, tgt= ]			(314.079, 302887.38)(315.0832, 62260.9)(316.0859, 9464.306)(317.08792, 681.52716)(296.06836, 82722.32)(297.0722, 15639.068)(298.0759, 1942.3226)(299.08972, 367.845)(315.08694, 297920.94)(316.09003, 52166.684)(317.09348, 8024.351)(318.09793, 496.33804)(332.52557, 198059.77)(333.11383, 28728.7)(334.1156, 1667.3309)(317.48697, 583.85254)(337.46786, 1488.9374)(321.0591, 111.39)	20.9565
CPD-17607	39857184	11303794	7382572	11971416	10565567	7801632	15423740	12278449	32101896	5285116	6212807	8546366	36927496	8370168	14181557	8946272	53121964	4653714	76600216	104529040	54433364	145390496	38779628	1	19081286	13606824	98693592	98693592	1	13234742	82860656	2271811	9888700	52976660	104501120	1	CPD-17607	CPD-17607 [ C17 H16 O2, tgt=86.31, overall=86.31 ]			(253.11862, 8725.899)(255.58836, 1066.5885)(253.45557, 12454.637)(254.1133, 297.98)(235.11195, 55438.914)(236.11644, 10716.128)(237.12494, 4162.955)(273.16037, 37532.375)(253.10747, 7915.449)(275.77448, 2095.465)(277.10825, 4938.0557)	23.8749
CPD-9623	808611	1	1	744146	1	1546332	716350	685665	1	1215341	1	1	1	647867	1	1	1	743788	1	2882251	4172109	3449990	4470469	1	3318446	1369342	4334110	4334110	1	2621040	1	1	1	1	1	1	CPD-9623	CPD-9623 [ C16 H12 O6, tgt=97.87, overall=97.87 ]			(300.0629, 921.88)(301.07123, 80693.31)(302.0744, 13529.548)(303.07654, 2022.8058)(283.0609, 882.8)(318.10052, 4026.214)(319.10284, 295.97336)(302.59518, 308.07498)	18.9777
CPD-17606	39857184	11303794	7382572	11971416	10565567	7801632	15423740	12278449	32101896	5285116	6212807	8546366	36927496	8370168	14181557	8946272	53121964	4653714	76600216	104529040	54433364	145390496	38779628	1636635	19081286	13606824	98693592	98693592	1	13234742	82860656	2271811	9888700	52976660	104501120	1	CPD-17606	CPD-17606 [ C17 H16 O2, tgt=86.31, overall=86.31 ]			(253.25235, 8668.343)(255.58836, 1066.5885)(237.1162, 6362.94)(253.42229, 14121.086)(254.12115, 436.97498)(235.11195, 54624.125)(236.11644, 10591.262)(237.12494, 4162.955)(273.16037, 37532.375)(253.10747, 7915.449)(275.78433, 2202.6538)(277.10825, 4938.0557)	23.7983
CPD-9624	1652977	2302084	1702015	984233	5928200	1801556	5681755	1041277	1	1441803	9025941	1200098	1	5315059	6079577	1108131	1456683	1685402	1880890	1771202	4363568	1	1	1	1	1177367	2872274	2872274	1	1	1	1	1	1	1	1	CPD-9624	CPD-9624 [ C15 H10 O6, tgt=99.21, overall=99.21 ]			(287.05557, 122976.7)(288.0586, 20484.955)(289.06146, 2663.047)(274.0612, 585.97876)(308.76303, 2672.9187)(290.33478, 2831.5764)	15.21
CPD-9620	251437	334780	509574	202514	245936	391055	1274582	204746	400402	264240	1537754	226217	360283	2659431	625665	315983	521968	398962	206887	352449	673105	439343	442500	353152	1	387951	303809	303809	264033	470455	399937	227191	1014795	2256309	322609	2056880	CPD-9620	CPD-9620 [ C15 H10 O7, tgt=82.60, overall=82.60 ]			(304.0501, 263.11)(285.63538, 1505.536)(303.05035, 14784.13)(304.054, 1865.5343)(305.06616, 408.945)(286.33078, 1486.717)(287.04385, 3544.248)(288.0456, 1225.08)(323.5865, 7316.309)(324.0867, 854.3)(303.19165, 21086.787)(305.47458, 39793.086)(306.07462, 878.55)(330.0477, 161.16)(312.0381, 226.51)	10.2827
CPD-9621	11709725	26858478	834849	2100664	1397942	1642410	1691320	1669422	105340232	1514304	10892834	14893575	10881108	965058	2084452	1502868	705935	1116873	570448	414181	4609367	5027895	5318714	3163711	1035754	1206608	8213722	8213722	710056	1188652	947575	1	689624	755296	523572	1841584	CPD-9621	CPD-9621 [ C18 H14 O8, tgt=97.82, overall=97.82 ]			(358.83838, 4610.801)(341.0655, 1041.24)(359.07654, 374880.6)(360.08014, 83858.23)(361.0862, 153924.23)(362.091, 21317.7)(341.06625, 3796.0498)(342.06955, 2307.3599)(343.0633, 827.79)(376.6606, 2884.6047)(377.1009, 2330.15)(361.97247, 4101.0054)(362.99573, 3165.1382)(363.1059, 9680.82)(381.0584, 39660.53)(382.102, 8272.897)(383.06793, 1522.3461)(367.063, 942.9756)(368.0654, 169.81)	14.8199
CODEINONE	4087769	4308662	2748381	3654334	1392992	1	1	1	1	1	4754698	1786906	1	1	1	1	1	1	1	1	1	1	1	1	1	1	1	1	1	1	1	1	1	1	1	1	CODEINONE	CODEINONE [ C18 H20 N O3, tgt=60.88, overall=60.88 ]			(303.1554, 218.84)(282.85376, 1853.3857)(283.97534, 9332.278)(284.74664, 2916.896)(285.14645, 662.085)(304.1689, 427.94)(298.3081, 12521.568)(321.13547, 26321.115)(322.13986, 3070.043)(323.14175, 144.99)(303.1245, 9313.288)	4.144
CPD-17610	2514609	13097089	2059986	3107826	1715380	13545354	2856431	2349710	1	2136944	1990001	1650566	12889689	9380993	8761846	1922364	12578098	1654946	2827579	4981286	1	5025962	5148214	11836388	5022236	2687743	1	1	4685806	5123000	4490192	5430324	4518881	4420907	4674997	14612891	CPD-17610	CPD-17610 [ C18 H16 O4, tgt=67.19, overall=67.19 ]			(297.48495, 2398.1152)(300.45007, 9068.151)(279.0941, 126422.695)(280.09763, 50032.387)(281.24432, 4963.62)(282.1056, 182.32666)(297.44672, 2622.386)(299.11783, 2876.3232)(314.45645, 197688.55)(315.14432, 45539.375)(316.15097, 4559.0513)(299.1369, 2145.893)(322.8955, 3121.7234)(324.1112, 188.18)(305.09824, 392.58496)	17.4691
CPD-17614	1	1	1	457821952	1	110553936	1	1	1	1	1	1	1	1	1	1	1	1	1	12626686	1	22245840	1	1	1	1	1	1	1	1	1	1	1	1	8153467	1	CPD-17614	CPD-17614 [ C18H29O3, tgt= ]			(293.81305, 381142.84)(294.81555, 75233.734)(295.20483, 7152.535)(275.1977, 7397561.0)(276.20068, 1154142.8)(277.20303, 142489.05)(278.20474, 8557.24)(295.22656, 9773.305)(280.22006, 5226.8833)(281.2211, 7924.38)(312.24982, 4590.065)(295.24323, 3748.95)(317.80737, 146439.03)(318.20825, 356264.72)(298.18976, 26452.035)	23.2673
CPD-19784	4752020	5152702	3996092	4777924	6766548	2993727	81117280	4833409	5799206	3011739	1	5478754	3719122	7006837	7386931	5361229	4613024	5112229	10802919	8885930	11805740	21711708	9453412	2314635	1602023	1993746	4855248	4855248	11233908	9215618	2960409	3442284	1	5031179	11033922	4290574	CPD-19784	CPD-19784 [ C11 H14 O4, tgt=86.95, overall=86.95 ]			(212.62897, 3058.672)(196.58974, 3610.978)(211.91432, 7627.4414)(212.93163, 4819.0063)(213.09119, 414.7)(193.08641, 355964.84)(194.08936, 40933.86)(195.0879, 6606.309)(196.0947, 245.39)(232.13554, 60203.55)(233.13419, 12030.0)(211.46935, 12235.74)(212.61746, 14055.305)(235.1369, 579.3759)(237.0908, 673.14)(218.07712, 19762.748)(220.07808, 22278.855)	17.3238
CPD-17616	8733513	19397196	3637080	6168485	7013745	7338619	6349500	4494508	13231247	9702937	18298934	6138544	7183656	7007754	8315844	8711471	6984271	10981472	24190584	22563676	43354328	43661936	56597816	35620540	41298420	26021130	46009760	46009760	40760536	26849436	37497260	16213622	34347676	28398684	35207896	36251124	CPD-17616	CPD-17616 [ C16 H12 O5, tgt=98.96, overall=98.96 ]			(285.07642, 1086169.1)(286.07968, 181984.1)(287.08215, 25912.293)(288.08627, 880.78564)(271.0794, 1269.16)(302.98895, 1211.1184)(304.96826, 223.99857)(309.24756, 2753.7341)(312.07468, 1027.8761)	21.8532
CPD-16891	1	1	94731192	98122912	43351748	712004	1	1	1	9726891	1	27647740	1	1	1	1	1	1379466	1104900	1	1	1	1	1	1477371	1	1164496	1164496	1	1	109344816	1	34447576	1	90191400	1	CPD-16891	CPD-16891 [ C6H14NO4, tgt= ]			(166.09491, 409205.75)(146.07953, 19200.023)(147.07545, 1951.4801)(167.10422, 7684.6797)(167.1059, 158.16)(149.09488, 16346.825)(184.13216, 60406.117)(166.12187, 162969.19)(169.128, 10007.49)(188.94307, 48167.98)(189.8139, 12597.109)(190.0812, 2343.7324)(172.1768, 5396.0127)(173.07939, 3098.2515)	14.7812
CPDQT-425	4127046	3843711	3180561	2921458	2883640	2073724	3566539	2551002	5956588	2436047	1904441	2911146	3956150	1	4028720	3195443	1426163	2545646	3883266	2830751	4591231	2818935	5388206	2433425	2937089	3402080	65649620	65649620	1	2977164	5309429	1245650	3188279	3770099	2496658	4538109	CPDQT-425	CPDQT-425 [ C19 H23 N4 O6 S, tgt=70.86, overall=70.86 ]			(435.983, 162659.9)(437.84665, 153197.7)(437.132, 105387.8)(438.1353, 15686.46)(422.23395, 8865.071)(420.1277, 1920.335)(440.1493, 10555.205)(441.48422, 952.73)(442.1522, 581.87)(420.34482, 78344.29)(421.17557, 22373.14)(422.4207, 6672.02)(423.13376, 1680.41)(454.17, 2196.027)(455.5408, 13732.672)(456.66946, 7445.5435)(457.1703, 2144.04)(437.51086, 24174.955)(439.28232, 6077.886)(439.16403, 1086.…	13.5871
CPDQT-426	2404558	1585937	1616335	1363801	1050870	1227352	1501863	1099030	1534133	1605248	1114469	1520619	1211090	1	1129154	1093818	1263473	1381973	1916548	1	1109608	3412768	1492626	1250027	1062485	1151835	1797842	1797842	1172970	599695	2291801	1628501	1	1	2095113	1	CPDQT-426	CPDQT-426 [ C15 H15 N O6, tgt=68.27, overall=68.27 ]			(307.09637, 1324.6564)(308.09656, 307.86334)(289.95685, 16706.14)(289.35242, 4903.8657)(291.0865, 19189.66)(292.0903, 1531.29)(307.1951, 2714.3208)(308.1035, 372.53)(288.82846, 12220.816)(290.09317, 1222.0247)(324.43542, 22216.158)(324.41794, 9882.264)(327.1327, 1357.0)(308.37085, 629.5675)(309.1191, 2504.15)(330.41843, 4232.554)(332.27194, 4967.7114)(332.2907, 5775.172)(332.75867, 4910.0703)(333…	13.1743
CPDQT-427	86880640	1	2309030	881326	100555376	131394168	2776624	82723896	2102840	696631	19567392	27687014	67590160	30265264	1	44508140	1	1	106844192	8153451	3139927	12708913	3909988	540826	77383152	700874	101753336	101753336	1	725601	5151805	1888319	1	1476631	116402200	675697	CPDQT-427	CPDQT-427 [ C12 H14 N2 O2 S, tgt=66.33, overall=66.33 ]			(253.38522, 3319.2202)(232.34898, 3660.062)(235.0629, 314.33)(252.87149, 7580.0938)(253.08426, 68.725006)(234.27675, 2775.7583)(236.07748, 252.30144)(269.80008, 75434.8)(270.83615, 18168.307)(271.48734, 3553.8635)(273.614, 14404.285)(274.1153, 4417.88)(252.8406, 6322.2124)(253.47537, 2470.501)(254.43611, 2719.2732)(255.1022, 12031.14)(276.41995, 157058.47)(277.3856, 22424.133)(278.07288, 418.0850…	9.25216
CPDQT-428	2979567	1028183	1629081	790849	406318	290114	4198251	954680	1054679	3070437	6351434	2759845	2588595	1593557	1	1	1	7761006	1924649	10582322	1671771	2312984	892167	9510047	1799667	1409170	1651780	1651780	1661166	811760	1	1761073	1	1621045	1703022	2913312	CPDQT-428	CPDQT-428 [ C9 H9 N O, tgt=62.66, overall=62.66 ]			(149.86676, 49795.16)(151.07689, 7176.3125)(152.08089, 1508.6)(132.0672, 21526.45)(148.85118, 23671.111)(153.09076, 753.83496)(130.06522, 49528.36)(166.97273, 17686.59)(168.73827, 46009.848)(170.11731, 170505.17)(147.92848, 11398.346)(149.42993, 11942.727)(152.1068, 47180.7)(170.14903, 17643.69)(172.06123, 830.93)(156.09749, 6516.6914)(157.06413, 6873.0215)	11.5225
CPDQT-422	1	120407	953490	442186	1	1	338247	307683	1	1	1	1	1	1	1	1	1	1	138695	1	129817	1	137589	1	1	1	163612	163612	1	1	1	1	1	1	161600	1	CPDQT-422	CPDQT-422 [ C12 H20 N O9 S2, tgt= ]			(369.05835, 8637.916)(370.06213, 680.5525)(405.09937, 15631.387)(387.0891, 16857.412)(409.0427, 237.16)	15.3946
CPDQT-424	1	1	1	2192825	1	4874040	1	1	8600549	3183291	1	4147262	1	3184954	1	1613476	1	1	5583058	5125820	4623097	5488865	30104258	7468047	6210274	6200933	3993464	3993464	9020416	8327601	4755668	8005028	5872971	7671913	4392592	7374414	CPDQT-424	CPDQT-424 [ C17H14N2, tgt= ]			(246.19574, 105604.26)(247.20284, 16972.27)(248.24608, 1884.0702)(249.12773, 19712.05)(251.47131, 13613.605)(251.1385, 6299.0645)(252.14066, 5690.94)(266.64005, 18335.652)(268.716, 16124.708)(269.1673, 16854.969)(270.27072, 5064.9243)(271.21033, 1181.6588)(272.4456, 805.63837)	5.54372
PENTOSE-RING	7032516	5353458	1089109	1085594	1	11553376	579698	1	6599577	1448226	4059726	1	4885313	1	4758747	4496567	3565002	4363658	2953461	3591372	3137123	3391689	7061801	3628420	4128557	2861193	5133998	5133998	10355332	1	5057811	3188551	4189848	1020848	4328059	675124	PENTOSE-RING	PENTOSE-RING [ C5 H10 O5, tgt=83.81, overall=83.81 ]			(152.23665, 73720.66)(153.06032, 7361.5986)(154.0605, 1302.48)(134.04588, 174.17778)(151.16855, 21148.951)(152.0695, 943.26)(133.88986, 40030.605)(138.0631, 95624.64)(171.3953, 4185.2817)(172.36961, 7547.964)(173.09697, 1164.0834)(150.59319, 23834.588)(174.37935, 146.30333)(159.99109, 1032.0048)	3.74097
CPD-12236	2990040	1	14973543	5650977	24867078	5743431	1	1	2206271	1	4985534	2740949	2619331	9433489	3242233	4349514	1	4990319	18095948	4338104	2919966	41268296	32443404	1	32731916	17577408	1	1	5763526	6865437	4388221	6640464	27013404	1	1	12948239	CPD-12236	CPD-12236 [ C15 H23 N4 O3, tgt=75.50, overall=75.50 ]			(308.47345, 47857.08)(309.18042, 16734.938)(309.1696, 252.99)(290.5042, 35701.668)(291.57205, 18649.559)(292.72998, 2953.4023)(294.1774, 6396.25)(309.1873, 6330.9297)(309.18927, 1986.1501)(310.1793, 3243.0)(291.051, 26459.107)(294.43594, 8943.757)(294.1811, 9127.19)(295.1831, 2612.57)(328.56757, 15415.576)(329.44556, 38810.637)(330.21985, 143223.0)(309.3244, 6298.8354)(333.25046, 6320.183)(334.92…	7.19395
CPD-4	1	312666	1	353802	1	1	313283	269722	1	259898	523384	429994	1	1396121	1	219542	1	251911	1	172868	1	1	1	321706	483877	631700	1	1	1	812391	1	855767	506975	253041	188086	255306	CPD-4	CPD-4 [ C10 H11 N5 O6 P S2, tgt= ]			(394.9922, 180.35)(375.97284, 663.825)(377.9754, 479.68)(378.9797, 948.91)(392.99792, 472.536)(379.20496, 387.97668)(380.9829, 203.94)(412.48563, 1087.8723)(413.0257, 2557.5376)(393.34692, 3318.126)(395.0087, 544.6967)(414.9777, 10383.197)(415.97842, 849.74426)(416.97653, 850.35333)(398.46832, 848.3654)(401.06494, 908.683)(401.82535, 460.9243)(401.9688, 184.53)	1.34978
CPD-12237	2316872	2088694	1	1945176	1499192	6023829	2053896	2043893	1242013	1904336	1293000	1	2553784	1804900	1337844	1753223	1916108	1942587	3709566	1775473	1595792	5853584	1786128	1483010	6687422	1	6397945	6397945	4660492	6067772	1258205	1047367	1	1674614	1763380	1	CPD-12237	CPD-12237 [ C14 H21 N4 O3, tgt=62.96, overall=62.96 ]			(295.8913, 50351.754)(297.10522, 21099.992)(297.1693, 2565.44)(278.1583, 42296.73)(295.30847, 16687.488)(277.77448, 19215.035)(278.447, 41622.656)(281.1678, 79.04)(314.65854, 74981.586)(315.97592, 65907.555)(316.207, 72982.38)(293.25293, 68747.055)(294.2266, 15491.569)(295.18604, 3942.3)(318.88638, 27009.58)(318.1452, 854.32)(299.6422, 17097.17)(301.149, 5198.27)	16.0841
EPOXYSQUALENE	1	21378004	7448790	20419896	19448684	27244436	34962352	1	22235412	19451332	21286418	4720453	13804646	1	52492172	1	1	10290230	1	1	1	1	1	1	12394498	1	11105494	11105494	1	11587512	1	1	1	1	1	1	EPOXYSQUALENE	EPOXYSQUALENE [ C30H50O, tgt= ]			(426.50693, 6897.2715)(428.39505, 5640.0103)(408.37103, 7963.761)(427.39142, 16227.4)(428.3965, 5541.2744)(409.38266, 65515.977)(410.38617, 20511.203)(411.3908, 1966.3485)(412.3941, 166.78)(444.4178, 7978.59)(445.42075, 2664.8818)(446.4321, 252.095)(426.99765, 1607.1294)(431.427, 771.39)(449.5611, 2494.8306)(450.6241, 450.1359)(432.97186, 5276.6846)(433.3699, 172.23)	29.889
CPD-0	1884679	1489052	1250895	1134055	1310757	1223566	1125891	858287	1033847	1650815	1203909	1427766	1447325	1274981	1527915	978173	1364709	1007474	3260814	2970840	3190861	3381631	3058095	1999319	2180635	1960476	2327215	2327215	2439407	3766691	3295134	981244	1851084	3971003	2720301	2210369	CPD-0	CPD-0 [ C10 H8 O4, tgt=85.14, overall=85.14 ]			(194.04536, 494.03333)(175.03569, 1628.2867)(196.06009, 169.785)(175.03677, 518.91394)(212.73279, 325.08847)(192.0659, 46488.547)(193.06932, 4923.1797)(194.08055, 380.99414)(217.03384, 975.19)	5.32656
CPD-7526	3673505	1859775	1073238	1009986	2950520	176817	1720219	209356	1053979	5061236	2298785	2339843	4127373	2543370	1601242	1771796	2813140	2397469	1	623600	7864443	1149825	2717050	1522292	2560973	11876894	1297210	1297210	639350	491077	1919051	4701712	1045845	943512	1257379	1177355	CPD-7526	CPD-7526 [ C40 H60, tgt=57.64, overall=57.64 ]			(542.2045, 3349.8362)(542.4759, 2718.2534)(543.0273, 5210.4272)(543.991, 8022.6304)(546.4874, 24036.33)(561.1719, 11557.194)(562.0637, 8531.586)(562.8232, 17064.67)(563.5198, 6205.4)(564.5245, 272.09)(565.37494, 7766.855)(565.9008, 1238.14)	29.3942
CPD-8960	6367035	5089156	5887520	5803120	4859026	5958048	7305918	4683916	5341671	5540575	6776359	6962286	6657827	7533950	4438955	4999449	5599281	4803705	1	1	8554821	8253132	9158086	1	6307517	1	1	1	8307886	1	1	1	7521220	1	1	7029040	CPD-8960	CPD-8960 [ C22 H22 O8, tgt=93.00, overall=93.00 ]			(415.55408, 128750.53)(415.1343, 62505.832)(416.13593, 11238.612)(417.13824, 716.7871)(398.76047, 4549.8867)(399.6921, 5344.5703)(400.12695, 3207.22)(399.12976, 4985.318)(400.13235, 647.39667)(433.02515, 133923.77)(434.1716, 29518.914)(435.1751, 5936.984)(415.34943, 191916.88)(416.16098, 50173.285)(439.88153, 13155.586)(441.12747, 5933.236)(419.11478, 6524.721)(420.11887, 1298.9343)	17.4413
CPD-8962	38556708	35909128	25406578	42527028	31009048	35078016	40682200	32032840	35081500	53686988	1	45847564	35810876	56090256	27812196	40513320	37675128	32728824	5235669	3019945	8508810	4176899	6677764	5230665	6876768	5121084	51287656	51287656	1	7350712	4204405	2807998	9601784	3824751	3638851	3079684	CPD-8962	CPD-8962 [ C23 H24 O9, tgt=83.22, overall=83.22 ]			(446.7004, 352.13663)(429.13766, 2952.2878)(430.80786, 407.0)(449.82422, 11627.09)(446.1534, 21522.11)(431.09357, 14477.679)(432.65582, 7610.913)(431.82632, 4064.4602)(465.6868, 2152.9934)(444.82175, 308525.2)(445.2708, 74127.55)(446.1738, 17380.0)(447.1787, 2166.48)(467.31677, 15497.145)(468.23868, 2352.5115)(469.33682, 431.22998)(449.1231, 14158.908)(450.12753, 2284.461)(451.12424, 396.89365)	12.2256
CPD-8961	1	1	1	3635796	2109474	11127359	1	1	1	2681793	3317571	1	1	1	1	1	1	1	1	1	1	1	1	1	1	1	1	1	1	1	1	1	1	1	1	1	CPD-8961	CPD-8961 [ C23H24O8, tgt= ]			(430.65613, 230642.2)(429.1548, 102183.41)(430.1574, 17991.11)(431.1604, 1986.25)(412.4783, 2367.9333)(414.14844, 759.505)(413.6543, 159.59)(414.65845, 5537.0903)(415.65692, 14223.275)(416.1567, 8520.75)(429.1728, 4654.115)(430.1715, 1031391.7)(431.1751, 240236.62)(432.1775, 43809.79)(433.18, 4758.61)(455.65085, 8865.91)(455.1513, 2574.89)(456.1551, 203.46)(436.13318, 114666.05)(437.13538, 22282.…	15.2141
NARINGIN	2391923	2048803	2224159	6396626	2136233	1863552	3466806	2854972	901865	8813595	2137115	3919633	2992323	5327375	2567697	3544220	1717764	965967	3114966	1	2203032	1709050	1267396	833203	2547453	2011570	1722049	1722049	1032059	1306413	1462297	2442690	926224	1793231	2179822	2004775	NARINGIN	NARINGIN [ C27 H32 O14, tgt=82.71, overall=82.71 ]			(581.1847, 49291.965)(582.18866, 13543.682)(583.5706, 2797.264)(584.1959, 674.32495)(564.46014, 1562.3944)(563.1692, 188.84)(581.75354, 26236.854)(582.8879, 9724.9795)(583.64124, 3952.683)(584.2054, 1189.26)(567.54956, 2988.9846)(568.19275, 4484.3975)(568.52545, 6237.83)(598.2967, 4994.536)(599.3636, 975.14307)(601.8945, 2359.88)(580.5302, 5578.879)(583.0445, 16098.397)(584.21436, 54937.47)(607.4…	15.1683
TRANS-CINNAMOYL-BETA-D-GLUCOSE	10679148	20548164	9055585	3418108	7272676	1	3754885	8291382	4000917	10731777	9984787	10090503	20832236	1	8100909	8651495	12007341	4442382	12238580	11899510	7143091	5929323	20573950	14229182	4650177	25520376	10177032	10177032	12802136	5770643	10014285	9278083	43878336	33577288	50302800	7001893	TRANS-CINNAMOYL-BETA-D-GLUCOSE	TRANS-CINNAMOYL-BETA-D-GLUCOSE [ C15 H18 O7, tgt=66.75, overall=66.75 ]			(312.92105, 2170.7363)(313.88394, 1845.0131)(314.1168, 635.06)(294.6025, 4077.115)(295.6497, 3125.2568)(295.82916, 1206.7164)(296.103, 318.26)(312.34787, 2067.8616)(314.11874, 5209.0464)(295.06372, 2038.477)(297.1122, 5437.286)(298.11707, 2084.835)(330.0222, 4370.8936)(331.20096, 700.2679)(312.03833, 8063.0566)(312.13406, 1080.8167)(334.41226, 9542.3)(334.08966, 1201.48)(316.72134, 376738.28)(316…	10.7037
CPD-14461	1	1	1	761983	612834	297271	1	1	429740	574400	437737	1	1	416801	1	269685	1	1	268181	1	181494	1	1	198473	1	149555	1	1	1	273074	1	516971	568937	402110	336048	1	CPD-14461	CPD-14461 [ C15H16O9, tgt= ]			(343.97675, 18213.64)(344.84457, 27185.863)(325.96786, 1033.3167)(326.83157, 4061.9778)(327.07983, 7192.8203)(342.42468, 777075.44)(342.0889, 1882.17)(359.1151, 4397444.5)(360.11697, 2297316.2)(361.1188, 514496.34)(362.12106, 63996.582)(363.124, 6482.697)(344.1112, 512.32)(367.07816, 5152.974)(368.0832, 1049.896)(345.06168, 9601.007)	20.6571
CPDQT-436	1857370	11451393	2945531	7587264	2998792	5280173	4555677	4556845	2088877	17058028	1688145	2660206	1	4456970	1765793	3519451	3968747	3301023	12009647	3927508	13305129	1724962	1	2551448	1749853	2218725	2323196	2323196	10562632	9759737	2711489	4329084	2795580	13658986	4110325	9121514	CPDQT-436	CPDQT-436 [ C10 H13 N2 O, tgt=84.70, overall=84.70 ]			(178.67372, 2574.9485)(179.108, 771.246)(159.6459, 42076.24)(160.09467, 19689.799)(181.996, 3217.4214)(160.10002, 57490.65)(161.09789, 9897.051)(162.09244, 3147.2314)(197.5942, 17891.96)(199.14487, 28160.709)(179.8618, 8898.936)(179.12872, 3553.4797)(201.87021, 16912.158)(204.10214, 2599.627)(205.1053, 197.54)(182.0816, 99288.77)(183.08553, 12649.0)	3.52517
CPDQT-434	317263	453080	211609	367934	10724364	12309834	353635	11546006	377795	775716	320062	13546634	14360464	431497	259538	386793	289268	12909531	1092238	549028	1921175	6650126	1470673	379379	1469108	1053324	1568908	1568908	3823486	1579936	4522069	5016466	2377337	4881747	1460739	2807609	CPDQT-434	CPDQT-434 [ C20 H24 N5 O6 S2, tgt=56.11, overall=56.11 ]			(494.54788, 6389.1216)(495.12183, 1220.506)(476.17944, 27224.713)(477.18277, 5967.6606)(478.11743, 628.7799)(500.12302, 8313.803)(501.125, 1639.285)(478.11523, 7770.14)(478.1152, 2581.93)(479.1231, 129.47)(516.4826, 3366.9802)(517.9781, 5720.67)(518.1463, 16894.5)(495.54684, 74143.07)(495.44547, 25860.152)(496.14114, 3653.962)(519.96277, 6657.077)(521.6499, 2469.3848)(501.94818, 2686.6208)(500.93…	14.5544
CPDQT-435	315939	391663	1094852	468680	142377	714451	316634	552198	235609	1	439401	462627	169550	254950	1081497	465850	223432	319053	1	1	167144	1	128414	1	372372	264900	209213	209213	147282	155480	1	789538	207501	199170	1	1	CPDQT-435	CPDQT-435 [ C21 H26 N5 O7 S2, tgt=59.38, overall=59.38 ]			(526.92883, 2104.2566)(527.33167, 2233.5737)(530.128, 1384.24)(509.11713, 206.11)(529.05585, 1854.3339)(531.12775, 3107.1917)(510.72696, 4392.697)(510.13016, 1061.9)(544.5789, 1129.4109)(543.1732, 175.69)(525.78235, 1785.3663)(527.1528, 3421.58)(528.14484, 6859.785)(533.26227, 2694.399)(530.1131, 230.15)	15.1015
IODOACETAMIDE	1	1	1	360237	1	1	268169	257978	1	187223	343652	249238	1	604558	1	1	1	1	1	1	1	1	1	1	1	1	1	1	1	477855	1	322445	1	1	1	1	IODOACETAMIDE	IODOACETAMIDE [ C2 H4 I N O, tgt= ]			(186.73752, 1206.2444)(186.9591, 824.89)(190.91225, 6470.746)	1.17769
CPDQT-432	291662	1019242	248598	1140713	355960	448199	1010532	1040289	448191	936827	1561570	824135	244242	3017216	586598	766688	1	799931	437610	573831	446773	1	244323	1000178	1431146	1813503	537511	537511	450196	1679801	366636	2074969	1424772	778717	628177	768207	CPDQT-432	CPDQT-432 [ C11 H10 N2 O5 S2, tgt=61.60, overall=61.60 ]			(336.9935, 1526.6664)(338.0044, 245.12999)(298.99332, 2234.6187)(299.9964, 268.72)(300.9917, 123.19)(332.04153, 564.143)(318.50702, 112.854996)(319.0106, 712.98)(322.89468, 8312.254)(323.9761, 108.99)(314.02655, 18687.107)(315.02588, 2658.1887)(316.0256, 1006.8046)(317.03952, 133.37334)	1.34989
CPD-6061	2652391	117820	2205064	2138817	2178797	2382914	2575236	1925569	2456988	2283546	2036404	223948	2737146	1	2225760	2115943	2516814	2393167	3268938	3332862	3446620	3756385	2740620	2020285	2865559	2840625	4084988	4084988	2372591	1876164	2438818	2044274	2996967	2473062	3382993	1761800	CPD-6061	CPD-6061 [ C9 H10 F N2 O8 P, tgt=53.79, overall=53.79 ]			(308.0141, 428.31)(345.06116, 2116.4949)(331.00247, 30773.393)(332.00565, 3087.914)(333.00027, 3427.2854)(327.04962, 329.06775)	19.8177
CPDQT-433	1602621	1347104	250646	1110952	1253775	762900	1086189	820430	812374	892189	1224518	1	1	1	1016173	413125	2009747	1	836351	1	459140	950127	2191868	328191	285869	1	408040	408040	200768	202333	1	268926	1	1	1	801594	CPDQT-433	CPDQT-433 [ C11 H10 N2 O S, tgt=47.44, overall=47.44 ]			(219.05103, 5367.5547)(201.04387, 15735.0)(204.20729, 953.8433)(222.39386, 5431.9585)(204.6048, 1110.265)(205.50337, 1697.4901)(238.35063, 891.8595)(240.08679, 385.77127)(241.08913, 378.93002)(220.80981, 3795.2393)(222.0766, 40.06)(241.0418, 289.93)(224.42693, 3857.5164)(224.02797, 3164.3567)	4.93529
CPD-12217	2766083	1972220	2634793	2865460	2691725	2546049	3174612	2323319	1	3169160	2557685	2599053	2978535	3131889	2454570	2614348	2531670	998321	657559	789890	725308	5274476	1	3980359	4375257	4704063	4945616	4945616	3594274	2768228	3066064	3738427	5250534	3390380	1	6738477	CPD-12217	CPD-12217 [ C15 H14 O2, tgt=83.27, overall=83.27 ]			(226.80092, 21728.4)(227.43628, 27973.9)(228.1066, 2721.9)(209.44188, 5301.852)(211.86961, 1576.4653)(213.10397, 839.24805)(229.25725, 31173.018)(228.11125, 17041.102)(209.09454, 6510.456)(210.10045, 1131.6533)(244.13554, 8974.935)(227.18718, 138791.36)(227.1273, 32097.469)(252.21834, 7611.841)(252.34723, 6122.709)(253.09917, 1683.6)(231.41357, 5346.9277)	19.9618
CHLOROACETOL-PHOSPHATE	683055	1	503761	405240	1	1052311	225433	343609	1	1	254832	417837	1	1	1	1	1	1	518178	1	1	1	1	1	1	1	1	1	402931	1	1	1	1	868061	1	1	CHLOROACETOL-PHOSPHATE	CHLOROACETOL-PHOSPHATE [ C3 H4 Cl O5 P, tgt=47.59, overall=47.59 ]			(210.35167, 615.3018)(212.93939, 3017.9404)	1.55387
CPD-14474	32850592	118186912	35605032	60848236	41707388	113708120	85097608	45817604	45878612	135053840	71296720	73260256	31473436	306534240	32485100	73009944	48624684	184900880	87365768	167249712	116433552	37592168	31037116	173476160	163316848	103807904	126713352	126713352	135006288	65943320	56722476	152988784	201187712	116797064	228893664	97490672	CPD-14474	CPD-14474 [ C9 H11 N O2, tgt=99.66, overall=99.66 ]			(165.0761, 243.87)(150.15785, 36125.26)(151.87978, 1605.7902)(166.08653, 2651483.8)(167.08948, 271079.5)(168.09464, 27318.46)(148.15912, 5805.658)(184.11366, 45318.613)(167.4138, 8798.25)(170.11728, 67951.8)(188.06903, 22162.514)(189.07262, 2889.0134)(170.49149, 2160.541)	4.77778
CPD-12225	1682833	1818792	7344045	5404897	5852298	8084823	5247544	5853500	5198069	1	5447945	7764741	9852493	1678402	8813327	1397218	5531463	3674739	1838444	1587729	1566095	2758396	1522964	6118149	1912849	3937125	2117226	2117226	1	3283084	911413	1	3280707	1300763	1382585	1	CPD-12225	CPD-12225 [ C11 H18 O, tgt=96.59, overall=96.59 ]			(169.50792, 3193.2217)(153.1418, 1539.3066)(168.79596, 2823.5703)(169.64865, 2146.11)(149.13243, 33192.004)(150.13449, 8902.131)(151.14679, 493.1875)(184.1697, 5249.8833)(185.1742, 1070.82)(190.1273, 26077.824)(190.87811, 13848.478)(191.1252, 9184.19)(171.47102, 65500.71)(174.7903, 334468.97)	18.4234
DIAMINONONANOATE	3033571	5167657	3435002	3707223	3746767	7664669	3314631	3796690	3801420	5617965	3306256	5290738	3460110	7449163	3222122	5125318	3091994	6331351	5517614	5938446	5074502	2634387	3437182	7957004	7057776	8907623	5602763	5602763	6694762	5914280	4259167	5670650	9862813	5504676	4556700	6047977	DIAMINONONANOATE	DIAMINONONANOATE [ C9 H21 N2 O2, tgt=96.77, overall=96.77 ]			(189.16013, 306307.84)(190.16223, 32404.291)(191.16295, 2949.0056)(171.60098, 1071.8474)(214.6286, 9537.308)(215.62762, 74153.62)(216.15932, 163204.4)(197.68956, 3202.3687)(198.14755, 3716.1663)	1.23572
CPD-8978	1	1	1	642471	607953	440986	559287	488550	1	1	1	1	857363	480053	274502	623622	265190	1	121303	106574	111538	174563	1	1	1	1	119408	119408	1	1	110598	1382550	1646577	1	299930	1	CPD-8978	CPD-8978 [ C2H5O4P, tgt= ]			(124.99978, 7779.1772)(146.0359, 1597.85)(127.0228, 1203.4958)	29.5034
CPD-13346	640238	506979	743854	504785	3829914	1	1073220	461396	728780	887866	1438704	1	17236080	1	839338	2348120	2261667	643508	3743245	21011864	1	981520	747217	2571514	1	592833	1492227	1492227	634606	2123773	3618580	1688670	1472836	3316179	2429224	2814094	CPD-13346	CPD-13346 [ C6 H12 O2, tgt=86.32, overall=86.32 ]			(118.08801, 358360.06)(119.09085, 22637.82)(120.0921, 87.59)(101.84128, 5951.5215)(103.0879, 2058.45)(119.31869, 10322.257)(102.08975, 12931.35)(136.46878, 4473.1313)(135.1217, 209.35)(116.10727, 21170.838)(117.105, 714.14667)(140.93576, 5493.5786)(122.58385, 43082.258)(122.06708, 2155.669)	9.56217
CPD-14478	8587599	19296628	8278320	14703064	11116571	9481352	13617505	7525434	7644255	10959635	16156969	11898221	14295146	10975286	9200996	9894111	8699108	6380928	7403454	11558834	9086066	14276677	6981642	13538187	7946577	8452684	15446047	15446047	12132276	5686903	9988435	17759064	12444242	18274708	12947528	25071018	CPD-14478	CPD-14478 [ C28 H40 O9, tgt=78.49, overall=78.49 ]			(520.61395, 52827.77)(521.30756, 16514.293)(522.27344, 4919.33)(523.2848, 189.09)(502.67905, 4984.6577)(504.77097, 392.31)(521.7811, 4588.7026)(504.04584, 158732.5)(505.12018, 43103.57)(506.26883, 14011.365)(508.15274, 893.4825)(508.9462, 446.80997)(541.7704, 12692.193)(542.99426, 5223.3047)(543.4214, 2090.6746)(524.0963, 1063.6141)(525.1728, 1405.8887)(526.1068, 340.36398)(544.1796, 19254.688)(5…	11.58
CPD-14479	37261428	33448426	20680264	33471058	36280356	12179937	44940532	40987800	41789600	18308856	13580913	39048376	33068774	37929192	14745951	12521907	25716816	28745452	20429528	31332256	33953700	32408988	25332548	1	28869056	23506168	26174752	26174752	24191440	29327368	25603680	43300216	34796516	15162957	33176284	1	CPD-14479	CPD-14479 [ C28 H40 O10, tgt=58.05, overall=58.05 ]			(536.4231, 38825.832)(537.431, 14731.978)(521.95056, 18123.95)(523.12213, 29411.004)(524.2648, 102431.33)(542.2845, 1193.28)(543.2807, 308.48)(519.2628, 177227.36)(556.4507, 7675.189)(557.36444, 4322.299)(558.2194, 6455.424)(559.0263, 2976.8672)(539.8803, 12306.0205)(540.71857, 6033.8926)(541.57544, 3637.779)(540.2997, 7481.94)(559.61597, 12492.454)(561.2592, 11028.607)(562.2653, 22557.86)(563.26…	14.9947
CPD-12222	7999646	12388221	17260060	7096656	7104825	5449094	9034335	6077777	7916607	7923697	13818511	8513774	7482555	6543938	7644520	55172248	4550100	4895873	1	10409673	8683127	12749825	1	7342082	7391694	9285226	11341162	11341162	11117382	6939587	5945355	6436012	5059112	16433216	9903311	5166742	CPD-12222	CPD-12222 [ C10 H16, tgt=99.49, overall=99.49 ]			(138.1321, 7177.58)(137.13235, 376439.5)(138.13496, 38763.086)(139.13756, 2136.6267)(154.15897, 34811.117)(155.16214, 3475.6465)	19.3429
HIS	1651168	1817529	2203919	1378381	2447251	17652360	1838585	3194002	5449373	1	1668703	1538442	4136656	1	4576132	4353832	1576419	1348725	2373132	1	2827091	1986457	2951510	2133628	1486176	1602794	4342817	4342817	2449206	1597851	999105	1713034	11489335	1937040	2621057	7550183	HIS	HIS [ C6 H9 N3 O2, tgt=78.33, overall=78.33 ]			(158.0756, 3458.3838)(160.0797, 510.67)(137.81056, 95891.12)(138.06331, 12324.802)(139.0643, 648.4914)(156.89037, 9716.168)(157.07472, 376.31332)(139.24307, 30452.688)(139.215, 9034.3125)(175.58461, 7587.503)(177.0348, 3816.4653)(177.1133, 2320.17)(157.09746, 805671.2)(158.10019, 33048.965)(179.49016, 2540.8728)(160.45096, 1994.748)(161.044, 828.99)	11.7684
CPD-12208	486129	1	1	563939	1	1	375568	437429	559215	615652	452127	334497	314745	1	281505	303998	357601	301836	1	474440	522654	436140	555011	1	516368	1	1	1	1	1	526425	721610	620250	1	530609	878351	CPD-12208	CPD-12208 [ C11 H9 O4, tgt=94.15, overall=94.15 ]			(205.0498, 19704.77)(206.10165, 2222.0598)(207.0518, 1353.4733)(188.29056, 1213.5875)(209.0664, 387.925)(226.24641, 1029.2747)(225.59409, 6346.4697)(207.07837, 988.29663)(231.10602, 12491.038)(213.0399, 3143.545)	15.8515
CPD-12207	32385112	48851788	5384864	20949298	23645632	18785918	1	9884359	39130756	32291286	27104844	9306965	22943924	16968480	22307204	22788262	22840450	15443268	44028200	34588912	76274944	61336900	69348352	14609608	8224418	1443391	56546568	56546568	12988929	10098389	55289132	24963608	1	32001560	70989280	24432440	CPD-12207	CPD-12207 [ C19 H16 O3, tgt=78.76, overall=78.76 ]			(293.26645, 12447.131)(294.2709, 2489.1362)(297.122, 1598.99)(276.16626, 3346.6765)(277.03433, 9561.757)(278.36047, 4426.3813)(279.1151, 894.23)(293.11688, 34403.082)(294.12122, 8359.759)(275.6802, 1192.3685)(313.33032, 9364.717)(315.0033, 7267.787)(315.1563, 10924.47)(295.23352, 4346.0947)(295.80933, 9682.84)(296.1481, 10618.57)(317.10275, 277282.97)(318.10568, 61830.824)(319.10925, 9064.276)(32…	19.5634
FORMYL-COA	3457321	2464464	2392878	1714980	2317249	2408758	2193376	2061058	2394687	7207625	2938892	2175698	3316880	6109460	2305872	4062277	2047436	1868518	2795681	3667079	2552055	1	1	1	1437755	1	1	1	1665989	1230108	1	1	1	1	2534479	1647552	FORMYL-COA	FORMYL-COA [ C22 H32 N7 O17 P3 S, tgt=33.90, overall=33.90 ]			(811.1054, 500.11)(814.0742, 17021.408)(815.0767, 2656.2185)(796.0461, 1727.14)	29.8097
CPD-12205	6628454	5930235	7521011	24192074	15880250	13825428	17121092	51924016	16849876	23125980	7507686	18203212	8352552	14186802	7659159	18572980	20033140	36367316	29467674	76234784	64907912	1	16616265	57178792	9688054	21764544	16986680	16986680	14962434	12614793	4817780	35084112	53419336	21922734	15991120	26968642	CPD-12205	CPD-12205 [ C19 H18 O2, tgt=81.41, overall=81.41 ]			(280.85736, 6335.3613)(281.85748, 2516.5425)(281.1389, 15683.02)(282.1454, 2113.86)(261.8762, 2895.1013)(262.58276, 5937.027)(263.13, 23495.979)(279.9831, 1417.4701)(261.85608, 3711.88)(263.1329, 11417.301)(296.39648, 5511.7134)(297.1615, 537.14)(279.66086, 28660.184)(301.11914, 1104593.1)(302.12213, 196617.69)(303.12906, 39724.105)(304.131, 3343.4924)(283.10812, 98464.875)(284.11105, 18190.504)(…	15.7706
10-DEACETYL-2-DEBENZOYLBACCATIN-III	78272384	63141328	9949899	80252848	7717905	47353716	71173056	14323860	77929432	17449918	7389028	20528132	29686024	12809719	14291027	53473032	82250368	13338969	52022648	49624616	54091808	67440088	49898512	38102872	40787044	44640656	50392032	50392032	1	3697018	37395312	29211482	1	31566698	48038820	33638048	10-DEACETYL-2-DEBENZOYLBACCATIN-III	10-DEACETYL-2-DEBENZOYLBACCATIN-III [ C22 H32 O9, tgt=67.48, overall=67.48 ]			(440.61902, 16385.533)(442.084, 7230.643)(442.1934, 328.88)(423.41943, 11493.379)(424.2762, 15955.246)(425.2036, 7351.156)(426.1988, 11569.65)(443.1257, 11684.095)(446.0012, 26502.072)(447.22852, 5465.2812)(424.53757, 19671.264)(425.7052, 8612.408)(426.205, 794.605)(427.70984, 39762.73)(428.2132, 71311.48)(460.29755, 195655.39)(461.24203, 49433.8)(462.34406, 12163.603)(463.24966, 5987.1123)(442.1…	10.8134
CPD-12209	167545680	2092779	9944290	9198853	73493688	51287656	93487888	77039376	146287664	10379563	13073795	25169008	151404544	52516804	90513136	59785128	187438368	12153251	218010960	259960640	201352032	314867456	174097936	82533424	114064376	89113192	256974080	256974080	176996560	2808435	236743920	9956875	3878133	197266016	249695600	1174610	CPD-12209	CPD-12209 [ C20 H14 O2, tgt=92.10, overall=92.10 ]			(289.91095, 3038.846)(271.06024, 566808.3)(272.10052, 98626.73)(273.1049, 13738.07)(291.00815, 1450.7323)(292.11823, 443.49857)(270.65625, 14656.755)(272.30365, 1945.334)(273.1079, 600.04504)(308.3817, 20832.572)(306.89124, 12852.921)(309.1516, 240.8)(286.41672, 5788322.5)(287.12424, 1820345.6)(288.1266, 283232.3)(289.12888, 36268.145)(311.0979, 503.65)(293.75296, 515.5933)(294.0854, 184.61)	19.4917
CPD-13357	2330880	2462539	1537713	2067910	538181	640429	1	1	1	872918	1753910	1064878	1886554	3179177	736215	1	1	1834522	1397527	891507	1476592	1215191	1	618805	2327741	1904933	1870601	1870601	588192	1088364	1	1666248	2812818	1377506	1163626	582794	CPD-13357	CPD-13357 [ C5 H9 O4, tgt=86.56, overall=86.56 ]			(134.20589, 4776.9473)(136.45532, 2423.008)(115.59237, 7643.618)(116.03575, 670.7512)(136.0277, 802942.06)(137.10503, 55615.164)(138.0649, 123.66)(153.08817, 2983.0002)(153.0895, 1975.81)(133.57532, 2369.0352)(134.0795, 248.03)(158.24545, 262.90997)(159.04665, 338.58334)(140.84525, 1883.0988)(141.03488, 1726.2275)	3.47394
CPD-12214	26723048	2146055	4313889	3584165	1659528	1	1711253	20109988	52757432	9584740	3931572	5368930	16500721	1699236	1716729	12259832	71336528	4771368	7532927	1	5839614	31921654	7654344	842650	9018400	2407490	22338312	22338312	1959479	2560772	1848287	6360525	1406575	12815572	2467713	1	CPD-12214	CPD-12214 [ C37 H43 N3 O9, tgt=58.87, overall=58.87 ]			(675.38885, 16100.993)(677.0103, 36608.164)(676.97144, 21238.982)(678.14325, 5258.683)(678.3092, 2239.94)(679.3174, 276.5)(655.85345, 4543.8354)(656.7976, 3441.67)(658.2892, 5834.42)(676.7137, 18561.998)(676.3053, 34795.69)(677.3069, 9013.32)(678.3157, 1706.35)(679.3214, 628.32)(680.3165, 93.89)(658.6214, 9435.338)(660.1389, 6351.8438)(662.3081, 9297.6)(693.632, 2610.3596)(694.8436, 1244.3339)(69…	19.4838
CPD-12215	6152789	5999721	4172217	4734537	7577230	1	81006240	4800699	6623544	2092700	4656011	1403755	5254470	6996569	8697989	5583655	5287063	5400610	11215429	10150426	12682956	1	10215074	1992786	1173633	2562279	4127443	4127443	3984553	2002828	2938320	2760542	55046768	4843598	11374706	3800854	CPD-12215	CPD-12215 [ C11 H12 O3, tgt=86.93, overall=86.93 ]			(196.37491, 3737.67)(177.65614, 22850.18)(177.074, 3266.35)(193.08641, 437951.94)(194.08951, 52786.777)(195.08891, 9952.8)(196.0947, 245.39)(175.07451, 71983.836)(211.23318, 12440.379)(212.61746, 14055.305)(192.80995, 3374.9863)(197.1176, 15990.53)(217.60497, 17830.324)(220.07811, 21559.951)(200.11093, 11185.289)(202.068, 15981.77)	17.7163
CPD-13354	2241255	1502111	2814846	1687539	1346907	8601054	1990266	1	2773121	2654704	1724893	1906456	1405782	2735833	953702	1	2005398	2901354	3999131	4862958	5245287	3583664	2438489	4015579	5841761	4452748	5494109	5494109	4616232	5402886	2817213	1	1	4240044	4585510	4700863	CPD-13354	CPD-13354 [ C14 H20 O7, tgt=84.64, overall=84.64 ]			(301.1276, 10947.75)(302.1257, 13282.65)(284.99884, 1604.798)(285.1168, 510.64)(302.82635, 6008.835)(302.132, 551.48334)(285.1202, 1885.09)(321.06216, 14662.533)(319.15836, 4491.085)(320.1636, 286.74)(300.2886, 150067.89)(301.14883, 23350.861)(302.15012, 2734.3303)(323.6742, 3641.753)(324.1145, 83.86)(305.7877, 4935.906)(306.10495, 4117.6304)	11.5731
CPD-14486	67258464	62237548	54879944	39239784	57194612	45663144	38692008	51030104	58308604	69116288	80190936	69791344	46423724	56773232	52500068	26647200	50262148	45089088	39845512	61782104	57569524	1	29976116	33571072	52786400	48507492	33419988	33419988	42966212	29049928	7161424	1	1	1	1	1	CPD-14486	CPD-14486 [ C30 H48 O3, tgt=79.52, overall=79.52 ]			(457.32672, 57270.902)(458.36826, 14762.969)(459.3626, 72486.98)(438.34488, 27023.713)(439.3501, 4729.79)(457.36472, 58890.19)(458.3637, 14427.447)(439.35654, 234535.23)(440.3597, 74766.09)(441.35892, 14393.674)(442.36438, 2224.6677)(474.39377, 4664.75)(460.95398, 1230.4421)(462.40262, 672.5533)(482.8984, 20647.938)(484.11737, 21760.887)(484.98422, 21812.469)(485.36148, 25277.541)(463.3411, 22249…	30.1443
CPD-12212	9350456	1	1	3212739	4961054	13977940	2978505	5923183	5208929	3783410	17950552	14838751	3991300	2998318	6752973	3759086	2641286	5804048	1	5347401	1	1	7328183	7758563	1	10534979	5260694	5260694	3152838	5386762	9006851	3648827	2675660	1	1	1	CPD-12212	CPD-12212 [ C34 H37 N3 O6, tgt=62.36, overall=62.36 ]			(584.8248, 21983.568)(586.52563, 9652.6045)(586.27246, 6574.1797)(566.962, 4159.2026)(568.2656, 4846.49)(569.2646, 8247.39)(587.2831, 13035.336)(586.52734, 11228.0205)(569.2746, 7129.438)(570.5644, 4905.2217)(571.949, 6303.85)(572.2903, 8733.17)(604.46655, 2309.102)(604.5585, 1994.5176)(606.32166, 1143.8301)(586.87445, 1800.7815)(587.80615, 2905.87)(607.8981, 18769.562)(609.51575, 12232.497)(610.…	16.7062
CPD-13353	14112235	11363825	15925960	16237431	20305784	13764591	12134107	20052128	12861598	11423556	11991431	7350790	14815753	11464396	14370628	12463233	12271209	6841348	9695522	6530145	10392570	1	11123372	12217279	9327363	9587273	19563180	19563180	13250564	17081072	11561034	14283989	14128328	13422591	1	14471276	CPD-13353	CPD-13353 [ C6 H13 N2 O3, tgt=73.23, overall=73.23 ]			(162.2188, 4994.4907)(164.60039, 392.26498)(165.101, 379.89502)(143.48354, 9862.807)(144.08177, 660.298)(162.09912, 194.91998)(163.0928, 44.32)(146.09384, 79670.805)(147.16441, 4308.098)(148.09741, 7145.022)(179.54231, 3526.756)(180.1202, 158.13)(163.87115, 18050.043)(188.18759, 14272.807)(189.09195, 223.3425)(166.82452, 79158.61)(167.72261, 8116.2007)	5.65723
CPD-14483	1	1	1	25453378	1	11619883	28080736	1	13013348	1	19527108	1	12993428	19813548	30055414	9212872	1	8426355	1	1	4753062	1	1	1	1	8116618	1	1	1	10665250	1	1	7502868	1	1	1	CPD-14483	CPD-14483 [ C30H45O4, tgt= ]			(472.34055, 21714.842)(473.61438, 9505.81)(475.3462, 28651.428)(453.8252, 2402.6824)(471.8477, 76234.78)(472.84958, 26464.863)(473.3466, 36031.09)(474.34976, 11313.795)(456.70224, 77505.42)(456.9677, 45149.72)(456.6738, 18952.717)(457.3447, 2675.26)(458.3463, 15190.32)(488.5242, 12857.279)(488.79416, 22709.467)(492.3746, 40618.7)(471.28503, 21707.658)(472.13992, 11696.865)(494.3313, 7749.09)(494.…	27.9171
CPD-4703	5054503	8148908	5552203	2466848	5195191	2276886	4327380	3192591	6526761	7680446	4502833	3612855	8044289	2136953	4059673	3592792	3343583	3232966	3827209	4297223	5244071	6742087	5567680	6040744	7715362	6489556	5144790	5144790	4723536	4989211	2845016	2784263	6934768	7068156	11680768	3848735	CPD-4703	CPD-4703 [ C15 H24, tgt=99.59, overall=99.59 ]			(205.1953, 222601.1)(206.19841, 39264.14)(207.20212, 2387.3286)(222.22179, 1756.0905)(223.22415, 204.52)(227.1756, 16682.682)	26.6223
CPD-10201	32679940	27302546	18174836	17018952	11866311	14654819	12583580	13152825	16348257	10070191	8821380	8408562	23388628	9261127	19980522	7518889	16189385	6328736	23015634	23009840	21584288	18628122	15679214	5741140	16389787	11501265	21218476	21218476	11845630	8124249	16961202	3263635	4418762	17682108	17848378	1945398	CPD-10201	CPD-10201 [ C7 H10 O3, tgt=87.86, overall=87.86 ]			(143.06726, 7885.261)(124.274765, 682506.56)(125.055275, 56560.28)(146.07913, 22113.703)(147.85541, 5951.6206)(148.08156, 5923.1133)(128.76312, 21112.557)(127.06524, 11715.919)(160.09628, 7224.9707)(142.08514, 8028.6504)(166.17712, 1341.6664)(166.0608, 135.31)(147.077, 10820.738)	15.0238
CPD-7547	841604	6843021	6608854	1464659	1107938	13166365	2405766	8727711	7453204	1	3576703	4467949	7669959	4497614	668339	287909	5891476	492176	1180442	1773234	1352672	1735783	1242303	828001	1	526109	1	1	496005	866857	1	1	1	1	1116036	659061	CPD-7547	CPD-7547 [ C13 H15 N3 O3 S, tgt=74.34, overall=74.34 ]			(293.54684, 8034.976)(277.06876, 96777.445)(280.0737, 793.0971)(299.09293, 1368.2374)(300.097, 3316.09)(277.08405, 1737.3507)(312.61792, 7848.1694)(314.22134, 3594.368)(317.1173, 1527.0)(294.60663, 5644.0674)(295.54834, 1946.2444)(297.482, 824.67377)(299.1151, 219.44)(318.2959, 4883.572)(319.44836, 2792.6626)(301.56366, 5636.7563)(304.0683, 317.79)	11.1996
CPD-7546	1	1281212	587388	788934	929123	381750	564122	701416	1	139272	866128	667640	580005	1592296	1	449287	1213191	674670	3073078	2807274	2554031	3769036	2153579	346182	616850	601374	2616845	2616845	863372	215490	2493846	564807	201624	1	1	1701488	CPD-7546	CPD-7546 [ C8H16N2O3S2, tgt= ]			(254.64372, 2402.6738)(256.77026, 356.8129)(234.04723, 268.20285)(257.14426, 1246.7616)(259.06522, 1766.7776)(235.70128, 3616.3418)(238.05493, 264.17416)(237.05475, 392.135)(272.83173, 1877.671)(274.29318, 818.69006)(255.14072, 1375.6893)(275.5002, 4986.318)(278.5482, 1915.1768)(262.36703, 852.1722)(263.03433, 617.7733)	4.14958
CPD-10206	62271048	13879910	3094664	4693365	4087708	100686904	2045188	1	4817319	4756810	29229354	2478267	2496673	2275609	2531721	2441742	2885516	2122526	1	1	86959104	1	4747541	13924826	24135804	2614220	17120532	17120532	3147472	2343954	3421193	1	3638794	3305438	2552053	7369751	CPD-10206	CPD-10206 [ C7 H8 O3, tgt=77.46, overall=77.46 ]			(140.90807, 417.31857)(125.0441, 445.6675)(143.77231, 20804.19)(145.06473, 2995.3904)(123.19294, 6459.6313)(124.04767, 526.1522)(125.0393, 286.9)(158.07965, 5334.2666)(159.0787, 493.85)(140.07042, 5944.9346)(163.70793, 194180.12)(164.0423, 41963.91)(145.17093, 1022.9771)	18.0494
CPD-8991	1496297	3218539	277001	8935603	407639	330234	7151391	676973	1417369	5669380	775396	6700866	1179638	1	488744	288158	3190906	276624	3124948	5777010	762861	12013695	1447390	960893	617978	3972688	5966448	5966448	1339508	9615673	4555854	1	1	2553224	7190831	1132944	CPD-8991	CPD-8991 [ C12 H10 O2, tgt=85.17, overall=85.17 ]			(187.40349, 57184.543)(189.5765, 5087.235)(168.91736, 96194.57)(169.22025, 24842.004)(170.06812, 3152.6516)(188.10786, 15278.824)(190.58524, 3710.9512)(172.07445, 7100.4487)(173.50638, 2810.1372)(174.0776, 11136.94)(204.10196, 11836.88)(205.10326, 2125.4026)(187.0466, 1060.4325)(210.42067, 12991.097)(211.065, 5300.52)	16.5549
CPD-10205	8157433	7069427	11326004	12068462	13075213	11196268	12549999	10901733	10135560	1	8987350	15028406	6519225	11058948	5260732	10909784	10192445	5317055	94339344	1	136164944	147698000	76574400	63773016	111691544	116910944	130703976	130703976	114356952	61623644	1	55035016	9879059	8014618	82672232	1	CPD-10205	CPD-10205 [ C6 H6 O3, tgt=83.91, overall=83.91 ]			(128.97934, 13904.975)(128.04468, 1211.1635)(129.0352, 2190.115)(109.02835, 48178.418)(110.03498, 9793.685)(144.22052, 19167.467)(145.06497, 1873.2122)(146.05927, 797.29626)(128.21677, 21267.506)(149.27388, 142361.45)(150.02687, 11787.532)(151.0285, 1634.7775)(136.02173, 4796.2397)	20.7541
PHE	32850592	118186912	35605032	60848236	41707388	113708120	85097608	45817604	45878612	135053840	71296720	73260256	31473436	306534240	32485100	73009944	48624684	184900880	87365768	167249712	116433552	37592168	31037116	173476160	163316848	103807904	126713352	126713352	135006288	65943320	56722476	152988784	201187712	116797064	228893664	97490672	PHE	PHE [ C9 H11 N O2, tgt=99.66, overall=99.66 ]			(165.0761, 243.87)(150.15785, 36125.26)(151.87978, 1605.7902)(166.08653, 2651483.8)(167.08948, 271079.5)(168.09464, 27318.46)(148.15912, 5805.658)(184.11366, 45318.613)(167.4138, 8798.25)(170.11728, 67951.8)(188.06903, 22162.514)(189.07262, 2889.0134)(170.49149, 2160.541)	4.77778
CPD-10204	1	1	716462	782659	1303921	5859096	1	1093359	1539825	1	1172983	1	1346670	1732344	2787904	735402	5701833	1	2120078	3008130	3237013	1	1838598	1	2306464	898901	1	1	4881355	2919765	1	1	4096681	1	3294008	1	CPD-10204	CPD-10204 [ C5H6O3, tgt= ]			(117.37304, 3165.6267)(100.03115, 431.18)(116.78005, 5068.8687)(118.84813, 1703.3441)(133.91545, 18526.95)(136.07524, 2915.1917)(114.05483, 19611.87)(116.0529, 3045.19)(140.79561, 11611.57)	18.8311
DEHYDROQUINATE	1225361	1178315	779683	925912	457561	614035	827516	803556	524220	854856	989627	446572	2845370	1161212	320231	731392	1528897	638500	3553734	1330111	3208077	4023046	3154762	1	1	507039	2956411	2956411	1	4014427	5225357	4519908	1745272	1	2956497	4985408	DEHYDROQUINATE	DEHYDROQUINATE [ C7 H9 O6, tgt=71.10, overall=71.10 ]			(189.07556, 15239.06)(190.04445, 1421.0692)(191.0555, 231.59)(172.27339, 2180.8982)(190.47948, 28307.314)(191.05336, 7172.3496)(173.96347, 1317.5392)(209.80792, 4438.726)(210.07925, 719.995)(192.03258, 1173.5443)(191.73846, 353.43668)(192.0679, 213.8)(213.0357, 3123.13)(214.031, 2816.66)	6.37839
CPD-10209	31868322	100704816	3647303	36182056	1	97348888	40222752	19334068	49383568	9354122	7651807	30363476	58298592	57667700	46544876	35794040	60581320	36954576	12426680	15853896	3108146	21676004	14083374	17604782	8652769	1	24993396	24993396	24164720	25040760	15656696	15573806	16468042	15380150	17829744	17871116	CPD-10209	CPD-10209 [ C9 H14 O3, tgt=97.70, overall=97.70 ]			(172.0582, 14575.775)(172.5999, 7747.3003)(173.1019, 2871.27)(155.8, 951989.75)(154.09128, 526795.56)(173.19673, 4100.3877)(174.1119, 8080.7144)(154.51234, 79009.336)(188.12843, 792429.8)(189.13075, 88878.164)(190.1255, 20481.207)(170.11731, 166118.94)(194.7455, 15686.112)(194.52022, 3234.8132)(175.07442, 56860.613)	26.7253
CPDQT-458	1	1	8079917	12269472	10972242	47617184	1	1	151617568	15823320	1	1	20134130	44023504	1	172236448	401034688	1	1	7553988	1	19195636	1	1	12286059	9123383	1	1	1	1	1	1	1	1	1	1	CPDQT-458	CPDQT-458 [ C18H30O4, tgt= ]			(311.41473, 3189.416)(294.9038, 904913.75)(293.20578, 355865.16)(294.20828, 38712.47)(295.2095, 3684.606)(311.8894, 9992.594)(314.2215, 3783.1)(293.21143, 361790.9)(294.21478, 68682.84)(295.2093, 3170.765)(331.92508, 1071.08)(332.2577, 1182.17)(310.90457, 1478.4283)(335.00757, 5073.4463)(335.70966, 14005.189)(337.2145, 6400.72)(318.5605, 706387.3)(319.9925, 130711.18)(320.20786, 20852.566)	18.1077
CPDQT-459	1	105541	108204	130419	1	1	118914	119777	1	130098	173316	2523699	8751509	1	932531	131508	5842010	1	7759676	466231	6094837	15394230	1	1	3936364	2158728	2290579	2290579	2917100	2634512	3158663	2411185	3450078	5259349	4021916	1382491	CPDQT-459	CPDQT-459 [ C53 H84 O2, tgt=45.49, overall=45.49 ]			(754.3159, 878.4561)(755.8568, 246.182)(757.6543, 30.1)(735.0859, 1056.08)(736.3118, 478.8967)(740.6524, 9806.55)(755.3257, 34079.652)(756.16174, 129005.59)(738.1179, 562.6407)(739.7517, 956.1436)(741.67285, 2402.3665)(770.9513, 4004.3035)(771.68976, 2191.8245)(772.6903, 1829.2141)(773.6941, 491.74667)(754.2695, 49830.027)(758.1846, 66095.65)(777.96045, 1754.4375)(779.1431, 2107.1467)(779.39233, …	21.5821
CPD-10207	44318204	36507908	23886452	22526020	15467223	19066660	1	1	1	11453736	11076870	10239726	1	11692119	1	1	1	1	1	6565912	1	1	3129406	1	1	1	1	1	1	1	23343584	1914775	1	1	1	1	CPD-10207	CPD-10207 [ C8 H10 O3, tgt=87.72, overall=87.72 ]			(155.2084, 2866.3015)(158.22282, 3161.1648)(159.0811, 1330.7)(137.05965, 901176.06)(138.06358, 77582.15)(139.06645, 2951.77)(172.09644, 13368.458)(173.09554, 1678.0712)(174.09103, 1829.54)(154.08624, 8000.9)(155.08286, 935.084)(178.55746, 9149.353)(180.314, 2456.1875)(160.54646, 2372.7456)	17.7436
SARCOSINE	1358934	4392205	677414	665329	568610	578932	789586	693200	749277	4772744	792252	1	690499	644357	2931716	707572	732450	960336	3424350	461281	1687401	885373	4683120	662743	4931632	1178093	1769746	1769746	633472	820801	633067	1	7642420	789047	937480	601026	SARCOSINE	SARCOSINE [ C3 H7 N O2, tgt=46.02, overall=46.02 ]			(110.20667, 21709.87)(111.09127, 20299.826)(113.03993, 2409.658)	13.8123
2-AMINOACRYLATE	35196768	30460116	21081716	19717420	14038396	17554306	14996253	15613862	19157760	11191865	10174884	10051954	27656608	11809609	23971646	10207057	18632396	8004172	27054136	27062244	25674480	21414102	18597334	7588767	19174800	13739196	24519626	24519626	1	8904462	20525744	3625325	10380514	18573266	19774184	1	2-AMINOACRYLATE	2-AMINOACRYLATE [ C3 H5 N O2, tgt=87.82, overall=87.82 ]			(106.06764, 373435.16)(107.07036, 14974.0625)(109.07501, 920.22754)	14.6524
CPD-13369	3802678	3564792	2987312	1430094	1012748	1409466	2031089	2191899	1860762	3727408	1564188	982904	1247448	2192516	1626902	1413135	1323768	1645661	8197748	1	9869194	6199140	9778782	7294690	8146649	7912025	14789553	14789553	7319136	7576368	2988526	1	2267597	6791298	2197541	10972141	CPD-13369	CPD-13369 [ C18 H26 O, tgt=82.65, overall=82.65 ]			(260.20178, 53262.07)(259.20602, 129628.125)(260.2037, 136639.97)(241.31313, 53987.48)(242.19762, 11941.714)(281.2468, 400.59335)(260.99432, 35406.496)(263.2406, 9698.51)(281.42264, 14511.031)(282.18854, 2273.6108)(264.18097, 67752.67)(265.29037, 23468.664)(267.1929, 455.47)	24.9175
CPD-14498	5158016	2878917	6413640	16444213	7560364	1148266	2086221	4459512	1	10790816	7319932	16668410	6776035	4900148	1073318	532349	13709880	2485044	2598583	5933490	6536849	5729422	3489314	7527278	5772154	4858398	8712173	8712173	15783810	9611462	7719869	5938092	6212586	4525358	2519839	5632554	CPD-14498	CPD-14498 [ C30 H48 O2, tgt=61.45, overall=61.45 ]			(441.08002, 40352.316)(441.96802, 5690.3584)(442.3665, 1196.3)(422.571, 4994.3604)(424.36307, 78262.914)(425.3668, 37185.996)(426.3655, 6719.89)(442.37683, 12574.626)(442.62784, 4064.2305)(443.3865, 122.0)(423.39697, 22032.568)(424.40268, 8031.4194)(426.3699, 6584.42)(460.51495, 2843.9556)(461.4113, 2906.9797)(442.85236, 634.1436)(465.61218, 8166.456)(466.93848, 7013.4697)(467.5668, 25058.77)(467…	28.8438
CPD-12202	36179992	13095334	7915603	11400330	10986517	7208081	15074035	11734171	28759620	5496809	5913735	3260378	29646684	7842182	14257536	8626822	44204868	4696694	53519412	73383552	47261564	100467344	36939096	13098241	19838464	14577929	74397024	74397024	38884736	13481623	58157472	3700862	17676384	46618312	68295288	12817957	CPD-12202	CPD-12202 [ C19 H18 O3, tgt=95.56, overall=95.56 ]			(294.12537, 4349.808)(279.23026, 4876.154)(281.12808, 5766.7637)(295.1337, 1489901.8)(296.13693, 317036.12)(297.14304, 48629.28)(298.14813, 6962.328)(277.28125, 21543.71)(278.3147, 5673.782)(279.13602, 579.81)(312.1624, 947.54)(297.32968, 16105.181)(299.16498, 27147.693)(320.02615, 4891.996)(321.12286, 7911.586)(322.1306, 877.2334)	23.8753
CPD-12203	9582071	6398798	7677869	3606700	13860100	28781816	3040010	8937551	17684512	4131373	1853553	3663420	4998258	2174658	5298302	5792930	7575225	9778395	9253559	10420148	7334707	17597252	1	1	331664	1	1	1	24842608	4163524	7086549	3067642	2346526	9175310	1	1	CPD-12203	CPD-12203 [ C19 H12 O3, tgt=69.60, overall=69.60 ]			(291.08392, 6579.9517)(292.0881, 319.19455)(273.8641, 1154.865)(293.59915, 1279.5977)(294.09973, 2766.8074)(274.94348, 726.54004)(276.08963, 1749.27)(308.3277, 1833.11)(309.1227, 2279.7131)(311.12793, 811.24)(288.27267, 5201.7896)(289.095, 1221.1692)(314.578, 408.00125)(316.0836, 357.46)(295.06348, 21246.234)(296.06625, 33165.383)(297.06885, 3038.8147)	2.26728
CPD-14496	67258464	62237548	54879944	39239784	57194612	45663144	38692008	51030104	58308604	69116288	80190936	69791344	46423724	56773232	52500068	26647200	50262148	45089088	39845512	61782104	57569524	1	29976116	33571072	52786400	48507492	33419988	33419988	42966212	29049928	7161424	1	1	1	1	1	CPD-14496	CPD-14496 [ C30 H48 O3, tgt=79.52, overall=79.52 ]			(457.32672, 57270.902)(458.36826, 14762.969)(459.3626, 72486.98)(438.34488, 27023.713)(439.3501, 4729.79)(457.36472, 58890.19)(458.3637, 14427.447)(439.35654, 234535.23)(440.3597, 74766.09)(441.35892, 14393.674)(442.36438, 2224.6677)(474.39377, 4664.75)(460.95398, 1230.4421)(462.40262, 672.5533)(482.8984, 20647.938)(484.11737, 21760.887)(484.98422, 21812.469)(485.36148, 25277.541)(463.3411, 22249…	30.1443
CPD-12204	32385112	48851788	5384864	20949298	23645632	18785918	1	9884359	39130756	32291286	27104844	9306965	22943924	16968480	22307204	22788262	22840450	15443268	44028200	34588912	76274944	61336900	69348352	1	1	1	56546568	56546568	1	1	1	1	1	1	1	24432440	CPD-12204	CPD-12204 [ C19 H16 O3, tgt=78.76, overall=78.76 ]			(293.11212, 13299.253)(294.11655, 2709.1455)(276.22742, 3482.3472)(277.05585, 9898.05)(278.44357, 3635.8499)(279.1151, 894.23)(293.11636, 38953.547)(294.12057, 8727.217)(275.70898, 978.026)(313.23386, 10663.49)(315.15714, 4954.9014)(295.14218, 2140.8848)(295.64008, 7845.955)(296.1481, 10618.57)(317.1017, 340681.78)(318.1052, 62570.55)(319.1088, 9060.35)(320.1138, 1180.76)(299.34354, 834.81757)(30…	19.6242
CPD-8999	4433899	6726569	4975028	8041443	5539485	5454503	6714457	6136226	3877445	8249443	8170124	7903715	3647165	3542883	4663873	4743756	3007293	4796793	5449040	4007186	2565061	2279037	3350930	4700861	4953833	5295441	3161516	3161516	3973469	4609549	4058121	3371410	4986861	6104197	3359747	6808572	CPD-8999	CPD-8999 [ C6 H9 O6 P S, tgt=71.25, overall=71.25 ]			(242.9895, 9796.59)(223.97313, 14564.382)(226.15479, 1541.5426)(242.9906, 9026.658)(244.07062, 572.5692)(227.06917, 206.53914)(259.5185, 585.155)(242.00613, 15929.047)(245.01054, 16384.064)(264.30618, 488.96997)	1.31094
CPD-8997	14485072	12017308	18450568	7107987	6830705	4982605	8523425	6062648	7770418	11339979	13710029	4436603	7318875	5505989	7149028	3681196	4685874	7136051	9006954	10457327	8807202	13022958	5994102	5719344	7431932	10756685	10898973	10898973	9923830	6917554	11214140	1	1	16195141	10492654	5197784	CPD-8997	CPD-8997 [ C10 H18 O, tgt=99.40, overall=99.40 ]			(156.1399, 5996.51)(156.61778, 2431.2122)(137.13234, 389376.8)(138.13525, 39632.23)(139.13808, 2024.7365)(154.15894, 36086.938)(155.16217, 3947.526)	19.3511
CPD-8996	14485072	12017308	18450568	7107987	6830705	4982605	8523425	6062648	7770418	11339979	13710029	4436603	7318875	5505989	7149028	3681196	4685874	7136051	9006954	10457327	8807202	13022958	5994102	5719344	7431932	10756685	10898973	10898973	9923830	6917554	11214140	1	1	16195141	10492654	5197784	CPD-8996	CPD-8996 [ C10 H18 O, tgt=99.40, overall=99.40 ]			(156.1399, 5996.51)(156.61778, 2431.2122)(137.13234, 389376.8)(138.13525, 39632.23)(139.13808, 2024.7365)(154.15894, 36086.938)(155.16217, 3947.526)	19.3511
CPD-14493	1	1	1	6494457	1	10409288	1	10516156	1	7806559	1	1	1	12971758	1	1	1	1	1	8757504	13455818	14003082	16557345	11645436	9449748	1	1	1	8668437	1	12644982	12604335	25217212	1	10048528	1	CPD-14493	CPD-14493 [ C30H47O3, tgt= ]			(455.35117, 150743.67)(456.35406, 51156.67)(457.35364, 23333.258)(437.34116, 115486.805)(438.34454, 37870.797)(439.35004, 4830.181)(456.3586, 18940.19)(475.23062, 2425.22)(478.20224, 1233.672)(478.9017, 226.11499)(479.4075, 4139.98)(459.89215, 3999.3257)(457.3872, 1549.57)(480.9929, 6818.73)(482.51987, 7691.6665)(484.3577, 4847.6196)(463.76703, 18517.938)(465.23422, 7467.434)(465.60074, 8382.455)…	27.5672
CPD-7535	3673505	1859775	1073238	1009986	2950520	176817	1	209356	1	5061236	2298785	2339843	1	1	1	1	1	1	1	623600	7864443	1	2717050	1522292	1	11876894	1	1	1	491077	1	1	1045845	943512	1257379	1177355	CPD-7535	CPD-7535 [ C40 H60, tgt=57.64, overall=57.64 ]			(542.1781, 3503.06)(542.4759, 2718.2534)(542.931, 5882.054)(544.8239, 2517.09)(561.4151, 12378.057)(562.2875, 11554.203)(562.8502, 19507.23)(563.5198, 6205.4)(564.5245, 272.09)(564.5798, 10478.142)(564.46924, 1593.0701)	28.6935
CPDQT-463	308797	290002	249898	603914	317857	265436	243787	288600	1	248462	369435	267668	439898	303513	445848	346202	327790	379362	393482	507333	398485	325718	338886	607502	429204	409084	383145	383145	236619	399696	462832	842340	440662	459899	335341	454259	CPDQT-463	CPDQT-463 [ C16 H19 N2 O10 S2, tgt=44.15, overall=44.15 ]			(465.04062, 9115.449)(466.04977, 4312.2783)(467.0727, 1412.2372)(468.05048, 917.5991)(445.03177, 2940.1353)(446.035, 503.518)(447.03162, 571.85)(466.05, 9144.005)(467.0529, 2582.35)(468.05, 3408.2)(469.0496, 127.33)(481.0818, 341.88)(463.57355, 418.005)(467.0719, 204.65)(488.1763, 365.56927)(471.0232, 607.53)(472.0207, 412.62)(473.0227, 120.7)	1.43017
CPD-10210	18899608	8792220	91439456	7470411	4656921	6676830	8181441	3944469	28587668	3815755	7050871	4905321	2992419	4717301	6170048	3838223	16388376	2391014	1	34401948	30748588	8240981	39652884	12610102	4985600	1	5483035	5483035	24927532	1775857	5710575	2253612	12072777	12085270	13767878	5008286	CPD-10210	CPD-10210 [ C8 H12 O3, tgt=79.72, overall=79.72 ]			(156.0797, 4206.25)(138.37619, 95211.99)(139.07202, 12797.221)(160.7429, 10160.15)(161.34628, 11620.567)(162.0977, 531.70337)(141.01866, 8785.533)(143.08438, 3704.757)(174.112, 10414.871)(156.10164, 125568.68)(182.29637, 71449.984)(183.00645, 12896.619)(183.07936, 26904.135)(163.56578, 41417.06)(163.06015, 3806.54)	19.7678
CPD-11924	1	2948738	1	3635796	2109474	11127359	3642635	2329940	1	2681793	3317571	11310930	1795226	3969565	2651595	3479215	3183218	1	2002007	5792746	7584897	2061741	6055370	3854180	1	1	6518863	6518863	4328502	1	1375135	1	1	1	6984369	1	CPD-11924	CPD-11924 [ C23H24O8, tgt= ]			(430.98972, 98860.914)(431.03223, 33037.234)(430.1586, 9111.217)(431.16083, 2076.25)(412.59903, 3456.4226)(413.923, 40351.875)(415.15448, 2163.515)(433.1696, 34538.36)(434.1727, 5110.37)(414.79913, 8135.7085)(415.8715, 10953.694)(415.82336, 12139.474)(416.1567, 8520.75)(448.38446, 19958.84)(449.19125, 12412.66)(429.07217, 5506.0566)(430.1113, 665311.4)(431.17538, 456031.56)(432.1775, 105884.125)(…	15.4273
CPD-8290	22378438	25747972	5624360	22042696	1	32839168	94735744	100135488	66293260	30010802	26941744	25391812	149806880	114765136	108885336	37147408	74961648	32655020	21121284	16716622	13378715	15368408	25528876	38933984	121454832	44155856	19491184	19491184	75800480	33225644	13646610	85267376	12827213	1	1	203218048	CPD-8290	CPD-8290 [ C41 H78 N O8 P, tgt=88.40, overall=88.40 ]			(743.6366, 52390.87)(745.5519, 11950.835)(745.55145, 2812.03)(727.5478, 3633.19)(744.55273, 94731.336)(745.5575, 41464.812)(746.5618, 20150.65)(731.55505, 105962.14)(761.5867, 290470.53)(762.58856, 81833.74)(763.5935, 21894.865)(764.5946, 2607.642)(747.1124, 26902.137)(747.5799, 21044.865)(748.2792, 9435.032)(749.24854, 10180.942)(766.534, 67001.34)(767.5349, 31886.863)(768.5277, 9186.05)(750.166…	28.0751
CPD-7561	49126600	19306000	11366912	15593947	14938466	9841170	20288740	1	37031324	8537681	1	4819817	37506332	9501723	18608794	10775877	53230552	5700964	61498360	81561728	56760360	109298904	45273292	16056632	24857180	17830348	85747280	85747280	47054408	16634918	72033048	3899412	21730180	54253508	73491184	14710318	CPD-7561	CPD-7561 [ C15 H22 O5, tgt=86.55, overall=86.55 ]			(284.04065, 8211.987)(268.54486, 2567.5017)(269.14822, 5691.8965)(284.15714, 4883.416)(270.1599, 12658.3)(304.41623, 131504.1)(286.43042, 355841.8)(308.97153, 19128.523)(309.93488, 13354.852)(310.15298, 10131.644)(287.12415, 1887133.8)(288.56863, 76089.89)(289.81506, 6251.887)(290.12994, 935.33997)	23.8727
CPD-7560	2576931	824190	975412	1292776	1506752	2245495	611620	1568296	1366649	983894	1	716728	1703430	1	1686053	1545356	2628290	1339389	2645976	1574399	1	4468720	7470978	1316926	2241729	907251	3157458	3157458	3869506	1248809	1625575	2642299	3644359	2396393	1573943	7535010	CPD-7560	CPD-7560 [ C15 H23 O4, tgt=76.54, overall=76.54 ]			(268.9002, 33176.527)(269.8831, 15192.349)(252.42978, 22975.164)(250.15201, 15055.97)(251.147, 5824.85)(268.16815, 15492.69)(251.50531, 18563.031)(252.30077, 3588.0095)(253.16333, 818.9055)(255.1703, 248.12)(285.19495, 6146.6484)(271.22443, 60488.953)(272.19748, 145018.33)(292.3102, 36868.36)(293.5611, 6144.4316)(294.16354, 939.79803)(273.6262, 13831.574)(274.75104, 2676.6152)(275.1435, 1443.06)	9.98483
CPD-10214	32679940	27302546	18174836	17018952	11866311	14654819	12583580	13152825	16348257	10070191	8821380	8408562	23388628	9261127	19980522	7518889	16189385	6328736	23015634	23009840	21584288	18628122	15679214	5741140	16389787	11501265	21218476	21218476	11845630	8124249	16961202	3263635	1	17682108	17848378	1	CPD-10214	CPD-10214 [ C7 H10 O3, tgt=87.86, overall=87.86 ]			(143.06728, 7573.2163)(124.0519, 721946.2)(125.055275, 56560.28)(146.07913, 22054.826)(147.85541, 5951.6206)(148.08156, 5923.1133)(128.98099, 13018.239)(129.0697, 9460.48)(160.09631, 7393.1523)(142.08517, 8066.3135)(166.17712, 1341.6664)(166.0608, 135.31)(147.07938, 10571.948)	14.6569
CPD-10216	12920804	11714942	10931568	761799	12907697	13965590	15508976	1	13058474	13537387	1	13856015	16103259	1	12628069	14049826	14634688	11287908	8818975	9187025	10065408	10799131	6423543	7061893	7884217	9971395	13152552	13152552	3407000	8008748	7625081	7193458	9480032	7540687	5136245	5470575	CPD-10216	CPD-10216 [ C12 H18 O8, tgt=74.87, overall=74.87 ]			(292.85904, 57570.664)(293.10654, 7081.654)(293.1106, 2599.31)(274.59805, 7743.605)(274.0983, 3424.93)(291.10712, 105260.37)(292.1108, 11267.215)(293.1088, 1772.1149)(273.129, 9771.667)(274.09985, 2526.086)(275.09305, 212.51222)(311.09946, 23484.63)(312.43924, 37105.195)(313.15088, 45140.867)(294.17953, 688.3808)(295.1392, 46.69)(315.05264, 2672.8628)(316.5445, 5640.1055)(318.1017, 1914.37)(299.0…	2.77022
CPD-6862	592368	123277	223462	275143	234072	922286	290829	160990	517102	1	208360	230480	694984	666602	1	148623	1	204072	1057310	396469	615943	119360	1096979	302983	381654	406462	206626	206626	580727	1618144	511023	1	326895	709896	406665	496479	CPD-6862	CPD-6862 [ C6 H5 O3, tgt=40.56, overall=40.56 ]			(129.09596, 29022.34)(129.70174, 6677.582)(130.0342, 1345.08)(111.022224, 5562.1963)(128.0348, 1664.49)(113.03458, 32594.62)(143.0569, 2957.07)(144.0529, 5610.55)(129.05594, 723.10754)	2.02231
CPD-4721	22985484	31280732	35575936	4280091	25894224	17782064	28055988	37397080	34633904	12544718	28431632	24501842	23402168	42778560	27784988	18986712	10198456	13274671	25169140	14893317	7994883	10588477	26830340	13692975	13054707	19072752	11766561	11766561	1	49638448	29224312	11059797	12768888	34582288	4656209	1	CPD-4721	CPD-4721 [ C15 H22 O, tgt=85.71, overall=85.71 ]			(219.1714, 48609.684)(201.16035, 16677.895)(220.17973, 6804.9727)(201.16135, 13522.199)(223.20677, 2104.2559)(241.15628, 334378.06)(242.15921, 48640.902)(243.1507, 355.93)(226.36722, 3300.1987)(227.07336, 4175.355)(228.1655, 3391.03)	2.648
5-HYDROXY-CONIFERALDEHYDE	1	1	1	1073920	1537533	1	1	1	3420657	3559829	1	1	1	1	1488276	1	1	1	1	1	1	1	1	1	1	1	1	1	1	1	1	1	1	1	1	1	5-HYDROXY-CONIFERALDEHYDE	5-HYDROXY-CONIFERALDEHYDE [ C10 H10 O4, tgt=87.41, overall=87.41 ]			(195.0669, 1252.755)(177.05464, 75199.19)(178.0582, 8345.548)(215.3005, 2858.5042)(216.302, 12888.918)(217.10327, 18944.668)(197.09094, 5403.5225)(198.09012, 1585.342)(201.04355, 8346.532)	20.275
THIAMINE	1	1913236	1510760	2634864	4000951	3860023	1477715	376213	1655295	2874426	2563258	2640957	3547337	2188111	1	3760709	2543215	3401785	3923903	1	3543397	1	4141915	2732448	1	3310482	4155211	4155211	7507334	6604428	3797032	2209493	3781425	3117040	3309642	1	THIAMINE	THIAMINE [ C12H17N4OS, tgt= ]			(265.24615, 38229.71)(266.26193, 7542.7812)(267.33496, 3808.9636)(270.1107, 1939.09)(247.90749, 8411.613)(248.106, 1457.0531)(249.1144, 84.88)(267.12106, 17152.588)(267.45197, 5366.04)(268.1207, 5911.04)(248.91084, 7106.932)(250.35933, 4898.5635)(252.1097, 1917.8666)(285.6143, 25356.441)(286.89676, 18861.025)(268.38654, 3057.1506)(270.1374, 8418.83)(289.23358, 3621.2725)(289.0986, 1368.5166)(290.…	3.25042
CPD-19816	1628442	12604680	1824506	1006041	1350050	5389059	701955	965180	937346	9339849	2080136	1183067	6482152	983882	1329736	950207	6944070	871207	1440599	8232387	3151910	11425145	18274892	13724131	18604904	14262053	2135088	2135088	13363977	20562746	1	1	28539820	1	1	13023985	CPD-19816	CPD-19816 [ C12 H16 O7 S, tgt=66.62, overall=66.62 ]			(305.98843, 7413.626)(308.39682, 1143.51)(288.05396, 3293.605)(290.0534, 106.14)(305.06827, 938.85333)(287.05618, 334143.53)(288.05862, 65255.875)(289.0614, 9226.416)(290.0655, 1274.4364)(322.61172, 15094.573)(323.5061, 3972.939)(326.0948, 212.48)(308.7585, 591.94446)(310.0936, 2440.33)(332.2416, 22299.588)	16.3103
CPD-19812	1	4173291	2653556	14731121	3336411	16207615	1	10730810	3488723	4949370	11731539	1	15264042	14313348	11748602	10046484	1	17841156	8909989	1	1	1	56034828	1264364	5847164	3712414	1	1	3449617	1	2532553	2770913	5570222	6458326	5717408	1411736	CPD-19812	CPD-19812 [ C18H25NO6, tgt= ]			(352.55756, 63427.973)(354.74606, 23449.201)(355.84494, 22274.928)(333.6881, 141124.16)(334.6961, 29734.373)(337.167, 4595.02)(355.9874, 19420.51)(355.6841, 12330.922)(354.1817, 5231.5)(335.1145, 19994.318)(336.52386, 5086.214)(338.42834, 3860.3025)(339.18146, 3730.415)(369.82144, 20196.242)(371.20627, 43861.484)(352.77563, 6637.003)(353.93176, 19019.73)(354.8669, 11068.39)(355.2026, 10332.025)(3…	11.5642
3-B-D-GALACTOSYL-SN-GLYCEROL	2053803	2030636	1560759	2144796	1520989	1449522	267923	221409	780953	2458500	2120936	1843585	404387	711752	357542	1531398	1895685	653039	3105622	5571527	1559976	4111280	830471	307513	341787	560952	1	1	2508176	565805	773220	2802092	2039169	2682557	3118233	2061483	3-B-D-GALACTOSYL-SN-GLYCEROL	3-B-D-GALACTOSYL-SN-GLYCEROL [ C9 H18 O8, tgt=88.61, overall=88.61 ]			(255.81873, 46004.125)(256.41855, 16845.273)(257.25195, 20000.41)(258.11102, 48051.71)(237.4773, 9134.473)(238.49629, 1337.729)(240.0982, 1988.865)(255.1703, 66074.09)(256.17706, 11912.081)(257.10886, 819.7871)(239.53731, 5431.1714)(240.10417, 3175.771)(241.44182, 933.3233)(272.3995, 14839.054)(273.1412, 2036.3342)(274.14374, 430.95)(256.69696, 2475.0454)(258.1318, 4361.7227)(278.8219, 3845.0625)…	14.9325
HMP	1925248	1678645	10013934	913746	13411286	3114062	19130484	11700358	5845544	15447629	1751389	2264942	1634073	16245325	979016	5363171	1803197	4116877	2592134	3514033	2736147	3558858	3489778	4558387	3001986	3761963	13389615	13389615	1	4196825	4281126	15455131	10978750	1	4617168	2900506	HMP	HMP [ C6 H9 N3 O, tgt=85.85, overall=85.85 ]			(140.13557, 5155.7676)(144.0834, 350.68)(121.653336, 108085.73)(122.35236, 10744.088)(123.0539, 958.975)(141.68481, 10001.308)(123.72205, 16244.265)(125.0769, 363.94)(142.00989, 27123.275)(164.42229, 113893.33)(165.51591, 41673.047)(166.0731, 8057.5405)(147.41495, 16295.604)(148.47893, 9160.922)(149.062, 376.28)	13.1154
2-AMINO-4-CARBOXYPYRIMIDINE	2377031	9386309	9244081	7284840	8200805	7476670	7514607	7580620	7487352	10206553	1375503	9779701	1	7421410	7730819	6926153	8501492	7779402	5793046	1942847	9580007	1290281	3621943	4414422	7468915	7771643	8871643	8871643	7779288	4148566	1	3595635	1	5412659	5198242	910509	2-AMINO-4-CARBOXYPYRIMIDINE	2-AMINO-4-CARBOXYPYRIMIDINE [ C5 H4 N3 O2, tgt=89.10, overall=89.10 ]			(139.03932, 18844.818)(140.0425, 972.5411)(141.0512, 137.12)(121.02846, 194858.34)(122.031654, 14094.724)(123.03616, 431.7481)(156.22214, 7759.016)(138.0554, 694.9167)	23.3607
CPD-11939	5583681	619234	719798	693955	762514	2303932	1788828	7710430	1	299815	214812	130516	1154387	1	1	1	1	1	1	1	1	1	399463	1	1	1	1	1	151917	1	1	1	3973511	383406	3647976	1	CPD-11939	CPD-11939 [ C6 H6 O30 P8, tgt=59.28, overall=59.28 ]			(810.6954, 1414.3834)(787.6671, 20213.89)(788.66705, 9152.053)(789.6706, 3545.6533)(811.0351, 131.4)(792.68335, 60608.887)(793.6833, 302.04)(824.9697, 1899.6675)(824.7272, 10.52)(806.9606, 3285.3623)(806.7107, 665.365)(807.7071, 225.87)(830.5294, 7932.387)(831.33984, 11224.845)(831.6719, 8758.195)(832.67114, 2937.33)(812.33514, 8723.051)(813.57227, 7297.9077)(814.0804, 11805.45)(814.68365, 6558.6…	28.496
CPD-10235	21181988	722945	8140553	21665252	19813684	199575	228639	18319106	194756	26645704	27026788	22770116	19724496	337859	365434	22285500	19622904	17736536	2429845	3414428	3713254	1	5145375	2971220	3452696	2314198	3955250	3955250	2889288	2480678	3068500	1976087	5110326	1919388	2782630	3251309	CPD-10235	CPD-10235 [ C23 H34 O23, tgt=71.68, overall=71.68 ]			(681.1468, 479.22)(683.1569, 261.59)(660.1423, 9650.84)(661.1464, 1681.83)(697.18866, 11807.444)(698.19183, 4531.0854)(699.19415, 881.82666)(679.1782, 224701.94)(680.18146, 86822.47)(681.1838, 20848.977)(682.1861, 4010.4495)(683.18866, 582.366)(704.61926, 2053.5183)(705.74677, 1416.3279)(707.1585, 5133.02)(689.08905, 83319.266)(689.1498, 42692.16)	22.2536
CPD-7557	22985484	31280732	35575936	4280091	25894224	17782064	28055988	37397080	34633904	12544718	28431632	24501842	23402168	42778560	27784988	18986712	10198456	13274671	25169140	14893317	7994883	10588477	26830340	13692975	13054707	19072752	11766561	11766561	1	49638448	29224312	11059797	12768888	34582288	4656209	1	CPD-7557	CPD-7557 [ C15 H22 O, tgt=85.71, overall=85.71 ]			(219.1714, 48609.684)(201.16035, 16677.895)(220.17973, 6804.9727)(201.16135, 13522.199)(223.20677, 2104.2559)(241.15628, 334378.06)(242.15921, 48640.902)(243.1507, 355.93)(226.36722, 3300.1987)(227.07336, 4175.355)(228.1655, 3391.03)	2.648
CPD-8289	3950791	5422720	7664120	39839716	9046648	1	34343032	59750616	11080748	13085074	6976260	1	39656284	17884968	18899414	22965958	30649706	42471636	4517234	2215995	14541370	18509820	25832796	39883368	37356236	28652552	23168264	23168264	5345560	27545744	69577248	19674360	14868792	49629256	27955708	13867298	CPD-8289	CPD-8289 [ C41 H80 N O8 P, tgt=80.56, overall=80.56 ]			(745.5603, 42996.484)(728.4268, 48575.94)(733.56146, 114529.81)(746.8256, 55681.633)(747.6492, 27904.959)(748.7341, 9055.253)(749.90967, 1619.7533)(733.2353, 55116.44)(763.59595, 27426.648)(764.6003, 6883.3516)(765.60815, 362.39)(747.37714, 15807.675)(748.7194, 8333.513)(749.59784, 4216.68)(768.8181, 72258.266)(769.8047, 36316.938)(772.55994, 12004.015)(751.7223, 55429.473)(753.12646, 1109608.8)(…	29.3362
CPD-7554	5054503	8148908	5552203	2466848	5195191	2276886	4327380	3192591	6526761	7680446	4502833	3612855	8044289	2136953	4059673	3592792	3343583	3232966	3827209	4297223	5244071	6742087	5567680	6040744	7715362	6489556	5144790	5144790	4723536	4989211	2845016	2784263	6934768	7068156	11680768	3848735	CPD-7554	CPD-7554 [ C15 H24, tgt=99.59, overall=99.59 ]			(205.1953, 222601.1)(206.19841, 39264.14)(207.20212, 2387.3286)(222.22179, 1756.0905)(223.22415, 204.52)(227.1756, 16682.682)	26.6223
CPD-11940	39882264	14385545	7892630	11350436	10496272	6945889	15276724	11120751	31304412	1343683	6864321	2803126	36106432	1	14050002	1	52037560	1	74849272	101780424	53746568	1	37620612	11839309	18801840	14381386	96435264	96435264	40307608	13357902	80538008	2169936	13474919	62634512	102326752	10654974	CPD-11940	CPD-11940 [ C15 H14 O5, tgt=97.67, overall=97.67 ]			(278.8764, 9365.356)(256.07343, 16260.933)(278.10144, 5615.5776)(257.0816, 1309626.0)(258.08493, 222936.61)(259.09045, 33591.203)(260.09567, 982.56)(292.5865, 3211.2341)(294.06238, 6927.3457)(274.60764, 1583.0435)(275.77798, 453.14664)(297.32764, 344.88748)	23.8721
1236-TETRAKIS-O-GALLOYL-BETA-D-GLUCOS	131793	449614	203012	287378	144628	116241	218366	138692	701668	125664	405202	428574	489500	563524	268447	225446	329035	588513	215601	249564	299270	1	149815	667516	477793	403008	341318	341318	1	821416	485612	1042345	675388	605935	138627	731213	1236-TETRAKIS-O-GALLOYL-BETA-D-GLUCOS	1236-TETRAKIS-O-GALLOYL-BETA-D-GLUCOS [ C34 H28 O22, tgt=52.71, overall=52.71 ]			(792.57007, 3076.793)(794.1207, 1776.5725)(806.13574, 13311.567)(807.1389, 3101.1409)(808.1372, 401.55)(789.145, 323.65143)(796.3838, 401.61212)(797.09924, 588.70593)(797.9733, 470.44128)(798.76447, 312.56668)(799.1012, 225.98)	6.37828
CPD-12266	1529758	2710410	2797837	6297820	3561239	2878047	5177750	5486736	4066405	4696203	3549768	4386963	506735	9898518	3148057	4492728	305113	4867130	101832	160547	104251	1	2057066	5152673	2706296	4595982	183271	183271	816286	1	2254372	1155513	178349	5995790	1	5020265	CPD-12266	CPD-12266 [ C3 H9 N O5 P, tgt=46.52, overall=46.52 ]			(173.0277, 43.34)(153.01424, 1988.1367)(172.91183, 3165.7646)(175.8961, 1338.4642)(155.35796, 1136.5941)(188.68361, 16311.472)(189.18309, 3777.995)(170.26471, 23197.215)(171.61179, 5387.6)(177.0073, 681.15)	5.48358
CPD-17592	2272243	1737413	2074625	2573898	1976389	2569353	2523322	3560719	2364271	1152784	1501252	6663813	2957851	3411367	1774389	3013698	2298073	3945078	2065743	1445618	2068818	100658744	1390356	2983675	5580257	1241433	7104133	7104133	50437392	4544755	1275520	1793730	2831474	1956904	2233465	1	CPD-17592	CPD-17592 [ C20 H22 O7, tgt=57.10, overall=57.10 ]			(377.27377, 10368.735)(378.073, 4673.104)(378.1425, 16170.67)(359.07288, 7079.565)(359.76065, 3174.939)(360.3365, 3757.8403)(376.23996, 105851.84)(377.8193, 34746.48)(379.15747, 7165.24)(360.25504, 5019.7715)(360.80942, 5436.1133)(393.61343, 270763.16)(395.1292, 79430.65)(394.6819, 3079.13)(376.0047, 4058.686)(376.49814, 6838.4087)(400.13333, 1758.4858)(401.13675, 2312.074)(402.1399, 1693.32)(381…	12.1747
CPD-17593	7492691	1496151	1651276	1721030	1444264	8145243	1	10659902	7538332	10051327	4510025	6130127	6767729	4917913	6849223	5888439	8306326	10001186	1668884	10180911	11369557	4102435	2211422	5998202	1609700	3943054	4871266	4871266	1	2407599	2369642	4682807	6497703	1	3354216	2843285	CPD-17593	CPD-17593 [ C21 H24 O7, tgt=68.45, overall=68.45 ]			(391.23883, 4899.104)(372.57562, 716.64996)(390.52722, 4489.7705)(390.16666, 880.29004)(391.1669, 190.495)(374.3876, 5910.6567)(374.66058, 2480.8025)(373.1495, 2326.0)(407.61166, 11481.188)(410.20282, 114652.03)(392.2826, 14425.631)(391.18542, 5302.605)(392.1905, 20079.01)(413.34024, 8970.127)(415.44058, 244948.88)(416.03033, 261020.67)(416.15918, 1953.545)(393.2996, 65779.55)(395.93423, 3757.742…	15.3917
CPD-17594	5162024	3085182	6957788	3499346	7633102	8414850	1	3436477	8504952	4387000	4305210	8995439	5578218	1	7187021	3437353	8086322	7626280	5462481	1771810	2790608	5247633	5475148	3616662	2259741	2724579	8476768	8476768	4427811	1535034	1832235	1	1	2373210	3134767	3350710	CPD-17594	CPD-17594 [ C22 H26 O7, tgt=92.03, overall=92.03 ]			(403.67288, 16732.223)(405.30017, 5546.755)(405.67908, 2664.955)(407.1857, 2291.24)(386.99582, 8031.2183)(386.1642, 1628.92)(404.68118, 14764.455)(404.97446, 6283.017)(388.77176, 33826.996)(389.55887, 8618.022)(421.6526, 12519.92)(422.12994, 7266.9224)(424.20938, 9187.13)(424.7103, 14687.965)(404.97137, 18734.877)(405.5626, 8989.546)(405.87134, 224238.8)(406.2073, 157291.58)(407.2106, 35447.58)(4…	13.146
CPD-17595	15338816	10360210	10165876	9733153	8777694	13025170	13398461	7456559	10377605	9640982	9543948	11438589	16839568	10167197	10212253	11476633	13226910	13201175	5725141	6161746	5891706	7321642	4433675	1	5791531	5373454	8209566	8209566	3681800	3904481	5037338	3365738	4882322	4738720	6575854	2199079	CPD-17595	CPD-17595 [ C22 H24 O7, tgt=94.62, overall=94.62 ]			(383.1486, 616.472)(404.17206, 718.107)(383.15015, 528.9733)(384.1653, 276.84)(420.69238, 530.745)(401.17886, 411338.2)(402.18228, 79314.914)(403.18515, 14333.06)	19.4879
CPD-17598	2662055	4665599	5657139	2386010	1706614	3405060	3262348	2029627	5420279	1985071	5522349	3376229	3401044	4801931	4248344	2371847	3595277	5546769	9512760	3036290	5881644	1	5899811	3850971	4809607	2497723	1553269	1553269	1193310	5213324	1360994	883276	2630784	922375	6772041	1026761	CPD-17598	CPD-17598 [ C20 H18 O6, tgt=83.22, overall=83.22 ]			(355.0234, 8309.103)(356.4541, 6253.6465)(358.1184, 6447.73)(359.1222, 2052.225)(338.10913, 33166.75)(339.1106, 7321.71)(340.1128, 1686.85)(355.87228, 6506.595)(356.1221, 1672.3301)(338.0489, 25611.734)(339.11392, 5416.247)(340.1143, 772.3209)(372.6465, 2403.608)(375.15628, 2559.1968)(376.65634, 1108.49)(377.1577, 2683.52)(358.1464, 5865.266)(378.46896, 5105.1035)(378.1051, 3968.38)(379.1018, 251…	19.3985
CPD-17599	3032842	18582172	4535272	15737655	11246853	15734214	1	1	13386219	14363609	8884660	8523368	13611746	14761119	9913977	11875838	13253799	6628523	27785762	1841129	1557998	25411196	21812252	8918215	22009932	30512936	36018040	36018040	1	11990219	26212568	3498397	1	21340316	22014240	27710196	CPD-17599	CPD-17599 [ C21 H22 O6, tgt=83.36, overall=83.36 ]			(372.81534, 5507.987)(374.1506, 810.5267)(375.1554, 33766.38)(355.36682, 28155.955)(357.14322, 30634.521)(373.0309, 5381.3486)(372.1543, 1157.2909)(353.6425, 24054.13)(354.3605, 12981.388)(356.14694, 7828.0493)(392.3859, 10582.264)(391.93723, 94097.086)(370.2848, 488255.16)(371.1713, 100904.84)(372.17447, 17831.336)(393.4187, 62751.273)(395.63754, 4936.1436)(396.88727, 10808.031)(376.0785, 44431.…	17.2611
CPD-6882	659000	2530071	1010694	1506577	983261	1008767	940752	1091552	927608	2946748	1119381	1951846	437627	2042318	584051	841327	540161	2007932	414968	792507	362322	291210	1724915	652376	683977	583386	474939	474939	337578	1963747	278406	591443	931014	438984	860968	504036	CPD-6882	CPD-6882 [ C13 H7 O5, tgt=78.22, overall=78.22 ]			(243.0252, 48.52)(228.0273, 2460.25)(247.04375, 3495.19)(229.03355, 2948.9248)(261.56323, 8907.755)(262.56836, 524.46497)(243.10905, 29475.0)(244.05693, 3302.5564)(252.01945, 2339.56)(253.0184, 2013.38)	6.43128
CPD-4743	20858752	21996896	35671896	21219360	25678356	16556127	14465062	35783060	31234212	11253716	28789492	21717016	24533142	47136224	27930316	21594878	10461995	12141076	35902664	13097913	9206848	10779403	37081840	5363815	12699881	18227540	33554628	33554628	25038480	48787792	29396028	10198543	13177609	34698736	10041760	1	CPD-4743	CPD-4743 [ C15 H24 O2, tgt=85.80, overall=85.80 ]			(237.18156, 5533.949)(238.18301, 583.8521)(219.17067, 50919.145)(237.18477, 1886.085)(219.29372, 42423.26)(220.18062, 2846.5032)(221.18394, 401.88)(260.3724, 10034.384)(264.1832, 5932.725)(241.15628, 333811.3)(242.15921, 48439.75)(243.1503, 405.905)	2.65467
12-DIHYDROVOMILENINE	1344329	3501392	1518682	2299558	1	1333115	1964397	1953744	2753375	6280036	1681875	2117181	1	2739135	1270342	2100129	3950970	16001471	2898089	8775314	13692530	20631368	12190031	1	21762150	3312120	1913366	1913366	1975572	13442584	1	3868585	3386728	3512942	2558692	3215386	12-DIHYDROVOMILENINE	12-DIHYDROVOMILENINE [ C21 H24 N2 O3, tgt=83.58, overall=83.58 ]			(353.3922, 45703.754)(353.95145, 13074.787)(354.18036, 2834.9043)(335.45566, 13367.7295)(335.89694, 4824.3706)(355.1335, 4193.9297)(355.69516, 2508.455)(356.197, 10411.39)(338.41647, 5129.0264)(339.9378, 6717.0376)(373.27048, 26245.672)(373.3493, 15586.294)(374.7279, 10255.69)(354.1674, 7612.152)(354.53745, 2528.3816)(376.29535, 27183.912)(377.61844, 5177.3677)(378.67908, 2425.1736)(380.17627, 28…	13.5435
CPD-4744	47956252	44095524	44303164	26055558	32574866	22505292	37764204	39587228	42000496	42852608	31233644	51694664	37993428	35833408	34928156	39615072	37753576	35993412	1	11009673	5519876	1	4708578	10320124	13105665	3971830	4883920	4883920	5059778	6967488	6004511	5276519	10383052	13922154	10079331	1	CPD-4744	CPD-4744 [ C15 H24 O3, tgt=61.65, overall=61.65 ]			(256.18375, 39372.06)(257.18634, 78330.22)(235.28717, 69336.625)(236.44981, 84273.234)(237.16934, 16495.662)(239.17592, 10870.258)(254.57352, 8321.668)(255.1867, 6789.49)(235.77115, 103448.17)(270.2055, 157.07)(253.60068, 899.5189)(276.8928, 19555.02)(279.23444, 20369.822)(280.0487, 22282.135)(280.1743, 15758.008)(258.15186, 11235.46)	27.6677
CPD-6883	659000	2530071	1010694	1506577	983261	1008767	940752	1091552	927608	2946748	1119381	1951846	437627	2042318	584051	841327	540161	2007932	414968	792507	362322	291210	1	652376	683977	583386	474939	474939	337578	1	278406	591443	931014	438984	860968	504036	CPD-6883	CPD-6883 [ C13 H7 O5, tgt=78.22, overall=78.22 ]			(243.05319, 31144.887)(244.05693, 3302.5564)	6.68917
CPD-4745	9126938	45955708	20792150	47502648	52326884	52754424	23894264	47817720	1	20351512	28086682	45757000	1	44961968	22012348	18327962	21022344	24589586	23182254	1876066	5477508	6021530	1	5267355	12151677	15163890	17066292	17066292	19542044	2898770	9176522	6262246	12294320	1	2133219	1	CPD-4745	CPD-4745 [ C14 H22 O2, tgt=74.22, overall=74.22 ]			(224.0027, 9856.324)(224.16951, 10503.423)(227.1777, 22435.59)(223.36958, 4847.7334)(205.15854, 73286.03)(206.15561, 509.52798)(240.28995, 11842.455)(241.19452, 4184.93)(225.19594, 18740.209)(226.34229, 2412.0195)(227.20024, 145.83333)(245.31569, 103449.24)(231.34583, 460843.66)(228.14047, 2390.9521)(229.1353, 126.61)	18.7992
CPD-4746	4086637	2357520	4177250	1433483	1	4806173	2629978	2085707	2013509	3356469	2460653	1	2151852	2143841	1330230	3648694	2268074	1521219	1504534	1	4824992	3525370	4101525	3264533	1682765	1204148	1690104	1690104	2532824	2666062	699731	1	3741666	1050398	804775	1493919	CPD-4746	CPD-4746 [ C15 H26 O3, tgt=53.66, overall=53.66 ]			(256.4313, 7539.018)(237.98264, 24475.926)(238.18416, 3504.0881)(240.8584, 1352.9167)(241.1923, 337.0)(256.59735, 6904.818)(237.59401, 43033.14)(238.18584, 8557.797)(239.1872, 1455.5775)(254.52185, 2480.2717)(258.2254, 4442.64)(277.42923, 66918.07)(280.18393, 19306.45)(281.1871, 15864.44)(260.92258, 111625.24)(264.181, 117438.97)	22.8001
CPD-6881	1241481	1064441	959029	929357	1106482	1002168	1535087	968894	1208359	1065998	889174	1410696	1469250	947691	1183690	999003	1348045	1136981	1178264	1599684	1	2229459	1	1	1273907	1230113	1641805	1641805	1	1091487	975061	990027	1358804	1274034	1585998	856571	CPD-6881	CPD-6881 [ C13 H10 O4, tgt=85.44, overall=85.44 ]			(234.0763, 454.28723)(248.0923, 39503.848)(249.09554, 6094.626)(231.83739, 3464.5486)(234.83275, 2581.1392)(235.09645, 549.28503)	9.75483
SALICYLALDEHYDE	9211626	3971071	9092200	6878680	5949699	6704017	8336469	5254853	6632786	10152531	1	6632278	1515858	7484776	455857	1490963	4054632	7732419	1	10111249	8409182	14172330	7803908	6922579	10212056	8499681	12092809	12092809	1	7672244	1	10123592	7519112	7621582	9779749	4418021	SALICYLALDEHYDE	SALICYLALDEHYDE [ C7 H6 O2, tgt=98.31, overall=98.31 ]			(123.97673, 3253.78)(123.04449, 12750.919)(124.0413, 1416.53)(105.03322, 146375.38)(106.03692, 11811.6455)(107.039345, 205.50334)(140.07031, 29034.912)(141.07051, 3332.805)(142.06686, 242.34799)(122.9368, 18675.73)(127.075134, 1500.2001)(129.02177, 9690.594)(132.0308, 343.395)	7.57425
CPD-6886	100453840	90847408	28740320	60279736	13359140	16940424	3857954	12243938	13223656	26160932	28009056	1	19440952	1	42256320	14117190	1	17892850	1	12126349	16074770	34590616	14910925	9456641	1	30683436	18561988	18561988	13154645	7213648	28196344	21336902	1	1	29621396	9419629	CPD-6886	CPD-6886 [ C13 H7 O6, tgt=55.64, overall=55.64 ]			(260.22662, 623.60803)(262.0307, 254.73)(244.41196, 2861.1006)(245.021, 7173.61)(261.03812, 3256.5183)(244.02594, 741.6775)(281.07108, 269.28073)(260.51813, 27411.754)(263.31522, 20623.775)(263.78357, 28234.88)(263.55573, 112648.586)(264.0574, 19247.77)(282.01385, 2120.9849)(283.017, 92.78)	1.76723
CPD-10244	7482714	9539997	5239388	3332018	2947216	3306242	7480171	7536408	4375246	8679264	7247347	10021749	3044480	5803220	7503472	3208285	5116771	4454033	5159082	7373706	11127350	6940715	7412351	7336929	7115666	8383793	13867041	13867041	7352678	7991203	8818385	8093921	8389566	7297428	5156373	7831973	CPD-10244	CPD-10244 [ C22 H31 O2, tgt=98.03, overall=98.03 ]			(327.23206, 98345.91)(328.23474, 32582.578)(309.22098, 97583.98)(310.22412, 23039.309)(311.2321, 1416.375)(329.29266, 42434.684)(313.24014, 1867.8301)(348.368, 19818.305)(349.2759, 10025.667)(350.27753, 2833.9275)(328.259, 775.28)(351.16092, 13108.635)(355.2345, 13073.75)(333.63043, 48397.0)(336.2251, 2655.7922)	25.0492
CPD-4748	743528	1	806466	435984	404933	399245	619983	424188	332629	764702	602425	557887	815593	513027	353061	488966	1012978	670779	524267	851618	1233638	511326	738379	731871	712475	604127	762793	762793	1252579	997720	544867	1	1	828615	450969	1	CPD-4748	CPD-4748 [ C4 H9 N O2, tgt=87.41, overall=87.41 ]			(107.0705, 3947.05)(104.3294, 42849.703)(105.07134, 2527.2588)(106.06625, 4044.4)(124.62184, 8665.097)(125.10677, 11526.696)(103.08638, 2654.1062)(126.053764, 2312.7324)(110.94928, 5154.4805)(112.05096, 23504.67)	4.56986
CPD-6884	100453840	90847408	28740320	60279736	13359140	16940424	3857954	12243938	13223656	26160932	28009056	1	19440952	1	42256320	14117190	1	17892850	1	12126349	16074770	34590616	14910925	9456641	1	30683436	18561988	18561988	13154645	7213648	28196344	21336902	1	1	29621396	9419629	CPD-6884	CPD-6884 [ C13 H7 O6, tgt=55.64, overall=55.64 ]			(260.22662, 623.60803)(262.0307, 254.73)(244.41196, 2861.1006)(245.021, 7173.61)(261.03812, 3256.5183)(244.02594, 741.6775)(281.07108, 269.28073)(260.51813, 27411.754)(263.31522, 20623.775)(263.78357, 28234.88)(263.55573, 112648.586)(264.0574, 19247.77)(282.01385, 2120.9849)(283.017, 92.78)	1.76723
CPD-6885	100453840	90847408	28740320	60279736	13359140	16940424	3857954	12243938	13223656	26160932	28009056	1	19440952	1	42256320	14117190	1	17892850	1	12126349	16074770	34590616	14910925	9456641	1	30683436	18561988	18561988	13154645	7213648	28196344	21336902	1	1	29621396	9419629	CPD-6885	CPD-6885 [ C13 H7 O6, tgt=55.64, overall=55.64 ]			(260.22662, 623.60803)(262.0307, 254.73)(244.41196, 2861.1006)(245.021, 7173.61)(261.03812, 3256.5183)(244.02594, 741.6775)(281.07108, 269.28073)(260.51813, 27411.754)(263.31522, 20623.775)(263.78357, 28234.88)(263.55573, 112648.586)(264.0574, 19247.77)(282.01385, 2120.9849)(283.017, 92.78)	1.76125
METHYLENE-THF	1656280	1403328	1569706	701040	2383638	8925248	3420458	3010902	3074961	1464175	2963208	2877205	2628209	2486195	2679992	3159239	1932212	2538508	3224068	2501515	3075781	2667805	2457512	2331555	2249910	3009684	1918662	1918662	1493589	1893747	1698072	1659188	10569860	1	2512134	2615341	METHYLENE-THF	METHYLENE-THF [ C20 H21 N7 O6, tgt=84.76, overall=84.76 ]			(455.15356, 9379.63)(456.16196, 2083.299)(457.1589, 289.01)(438.62384, 3257.0303)(440.01694, 566.62006)(441.4845, 1774.3301)(441.1533, 427.56)(442.1528, 246.13)(456.16812, 47054.5)(457.16904, 23420.783)(458.1692, 2509.29)(440.31784, 14939.474)(441.49597, 25502.541)(443.1707, 30420.65)(475.58218, 16218.61)(477.19937, 9037.563)(477.2046, 13048.43)(457.03268, 13905.359)(458.0396, 41852.35)(459.266, …	11.2278
CPD-9807	445955	3504048	2731710	3385102	2106217	1	2863362	2409294	1889971	652851	698169	1	1	1	2984713	2204112	1	2705686	787770	2324611	585231	3463669	518595	1957825	191909	2484474	1767857	1767857	1	1380456	620145	1	1234750	1	2173825	945583	CPD-9807	CPD-9807 [ C10 H10 O5, tgt=75.13, overall=75.13 ]			(214.56313, 20902.732)(215.0644, 12693.08)(196.05104, 183289.58)(213.68587, 158574.1)(214.16678, 27549.213)(196.99396, 105700.67)(197.92094, 35665.652)(229.64626, 3173.4282)(232.22998, 6381.181)(233.097, 15184.65)(211.84251, 40021.207)(211.939, 6668.2886)(234.21956, 7280.0654)(234.7546, 2519.1775)(216.14561, 1853.1333)	7.22434
CPD-4741	193571472	1	104044064	93347256	112991728	91680696	123245416	146686336	1	1	215808512	1	141798528	119383664	132898744	148247152	135246912	119421824	30822028	24716934	66703872	55757256	44413608	35835568	39871424	45670664	26549014	26549014	1	1	57223432	1	43334464	71965408	44055976	9418525	CPD-4741	CPD-4741 [ C15 H22 O2, tgt=58.88, overall=58.88 ]			(235.23463, 63214.56)(236.3061, 83310.75)(237.24092, 13219.589)(239.17587, 9837.15)(237.17682, 16017.445)(217.15611, 721557.1)(218.15941, 91237.766)(253.31079, 1387.1865)(239.19974, 2498.2551)(258.15158, 10520.529)(242.73714, 40337.973)(243.0511, 23769.355)(243.1512, 34082.13)	27.1023
CPD-9803	1	3504048	2731710	3385102	2106217	1	1	1	1	1	1	1	1	1	1	1	1	1	1	2324611	1	1	1	1957825	1	2484474	1	1	1	1	620145	1	1234750	1	1	945583	CPD-9803	CPD-9803 [ C10H10O5, tgt= ]			(215.06378, 28923.43)(196.04935, 5861.96)(213.20866, 304948.75)(214.06651, 36020.496)(196.81085, 4698.54)(197.0609, 2274.07)(228.75558, 2135.7075)(232.09648, 3061.8179)(212.45853, 6773.415)(211.0811, 1841.34)(233.48877, 9165.779)(234.04686, 250.99715)(217.03477, 1302.8966)	2.70044
CPD-4742	193571472	1	104044064	93347256	112991728	91680696	123245416	146686336	1	1	215808512	1	141798528	119383664	132898744	148247152	135246912	119421824	1	1	1	1	1	1	1	1	1	1	1	1	1	1	1	1	1	9418525	CPD-4742	CPD-4742 [ C15 H22 O2, tgt=58.88, overall=58.88 ]			(235.16594, 64428.56)(236.16765, 95382.9)(237.16962, 18154.55)(239.17526, 10125.462)(238.18, 130.93)(217.15602, 958691.7)(218.15932, 119571.7)(252.1939, 928.75)(239.1993, 3363.23)(258.1526, 539.995)(243.08476, 45142.723)(243.1506, 28853.98)	26.2197
DOCOSANOATE	2565423	2515381	1839817	690904	1104077	923304	1	1175703	1355892	1222428	2365820	1417977	824267	111464288	1595525	3918573	1137569	1258892	1678753	2093881	1985359	3117897	2305850	2535465	2501285	1934156	2672065	2672065	1187523	1827249	1498197	912069	4500022	15110087	1	8500592	DOCOSANOATE	DOCOSANOATE [ C22 H43 O2, tgt=98.89, overall=98.89 ]			(341.9033, 1821.5057)(340.328, 1968.44)(321.31412, 23143.627)(322.31424, 8713.708)(323.3209, 4606.475)(324.3248, 1285.1)(345.3491, 2879.838)(324.3262, 355.07)(358.36658, 5226.09)(359.371, 1167.385)(339.41516, 81338.24)(340.39764, 12327.623)(341.349, 9935.484)(364.58725, 420205.53)(365.324, 122193.445)(366.4108, 20343.555)(367.33218, 5470.0625)(348.18356, 1642.5653)(345.2975, 1823.5868)(346.29446,…	26.0443
CPD-6041	1186401	787484	1	1893966	1470695	1251187	1	1	2714126	5608159	1297168	1	1272521	1	846938	425332	1882755	2312380	1376668	1515886	1	1954500	1302765	1432069	1704986	2055879	1662156	1662156	825981	1	2102427	1	1	11783086	1893951	2014836	CPD-6041	CPD-6041 [ C20 H20 N8 O5, tgt=59.13, overall=59.13 ]			(452.5851, 3655.7578)(453.15857, 1379.0917)(436.42285, 2615.4526)(455.3939, 25016.867)(456.3907, 77053.06)(457.29584, 18787.748)(458.17285, 1658.182)(438.85858, 2313.3218)(438.82703, 763.35333)(470.87744, 16831.143)(471.90997, 14186.17)(474.0541, 3587.81)(475.2052, 4929.185)(452.87503, 22899.53)(454.12015, 11841.73)(454.18018, 1848.5175)(477.07764, 5029.8774)(478.15826, 2269.3337)(479.16113, 485.…	15.5526
S-STYLOPINE	73266216	135993344	2595963	56430536	68732824	72120880	1553755	52014816	109326952	78554104	108778328	54532112	86418440	87389520	86056608	1440707	86836352	65254840	3637170	12545355	3202885	3419700	2999934	107463584	117312208	1	14622201	14622201	231737184	189373888	195195264	47005600	136525680	2449738	3694484	116166064	S-STYLOPINE	S-STYLOPINE [ C19 H17 N O4, tgt=80.54, overall=80.54 ]			(326.3244, 1718.9785)(324.1152, 1559.85)(308.26736, 1694.2175)(310.11816, 629.88666)(327.99237, 1045.9186)(309.8724, 10436.348)(310.1202, 511.47)(343.11398, 6588.7246)(343.65796, 3006.425)(325.05783, 44292.473)(326.0225, 13626.107)(326.1475, 14573.15)(346.1303, 3079431.2)(347.10428, 709542.3)(348.1067, 106402.5)(349.1099, 11246.921)(329.13293, 7395.0605)(330.2703, 545.9083)	19.3366
CPD-4754	1	6284916	1	1306786	841747	311056	1	1538427	1	1	585854	635162	1	343661	388727	487271	846086	2664294	1	725136	1047803	1	653567	1812887	3208863	2391065	1754813	1754813	226906	2329938	1473861	1900995	1991220	1	20919684	2152675	CPD-4754	CPD-4754 [ C20 H32, tgt=46.50, overall=46.50 ]			(272.24936, 713.717)(273.33258, 6331.3433)(274.26114, 875.209)(291.00183, 218.34286)(296.19846, 7569.0)(297.13492, 1354.4922)	28.2802
CPD-10255	476499	1579788	517838	621770	330541	472395	1016092	2029710	1121647	1099432	2038879	2745166	1	1208251	603977	546890	1	916571	714227	775094	806253	1122950	1283542	1009095	435095	1	355953	355953	1	593650	368411	1	1	322688	1	1	CPD-10255	CPD-10255 [ C37 H56 N7 O17 P3 S, tgt=42.98, overall=42.98 ]			(996.2623, 4757.944)(997.26544, 2835.4727)(998.2681, 1358.5488)(999.77325, 361.65503)(1000.27454, 1217.7)(1001.2821, 523.92)(982.2804, 269.97003)(1014.6443, 4189.775)(1016.4076, 525.182)(1016.8096, 268.855)(1020.3137, 1361.29)(1001.3071, 5741.1445)(1002.3098, 9586.9795)	26.8105
CPD-10254	1799966	2599529	2842290	1001364	656435	1	2584617	2761871	1252682	2688488	2981216	2212119	537556	1	2085356	1186874	964560	1543090	1470181	620552	1523273	1	1	574772	579521	960271	1096690	1096690	433822	489898	818610	1152289	1533655	1340763	835590	715598	CPD-10254	CPD-10254 [ C37 H58 N7 O17 P3 S, tgt=66.71, overall=66.71 ]			(1001.93256, 10594.359)(1002.73816, 15443.267)(1003.3076, 1282.8999)(1004.80597, 2692.175)(1005.30634, 4505.8867)(985.30005, 187.02501)(1016.5379, 3425.491)(1017.7851, 1191.7129)(1019.2751, 1143.3752)(1020.32294, 871.0533)(1020.9926, 794.7066)(1021.3181, 1227.15)(1022.3158, 1997.08)(1001.20886, 14988.825)(1002.31055, 29639.195)(1003.3091, 1507.5306)(1004.30615, 907.22125)(1004.268, 960.41)	29.7187
CPD0-954	975801	1	865527	834208	856679	1	1259798	1268676	1	1659494	3327538	1	1784519	1433199	1	794746	4087672	1	4893710	1	1	1	1	1	1	1	1	1	3602928	3510761	2528744	5043163	3383427	3610961	2238073	5433663	CPD0-954	CPD0-954 [ C10 H6 O2, tgt=79.11, overall=79.11 ]			(161.04367, 406.70337)(142.23239, 5466.0283)(159.04428, 24690.344)(160.05006, 3049.5269)(161.04419, 687.255)(141.03151, 10953.841)(176.07068, 71228.14)(177.07234, 6549.225)(178.07411, 394.89832)(158.06061, 13121.244)(159.06303, 2094.982)(160.0595, 141.48)	15.3052
CPD-4750	1	1	1	3645411	1698235	2525136	1	2741569	2346164	1	3731483	3038568	1	4380234	1	1	2799281	2217267	1	4304694	1	1	4847910	3532400	1	1	1	1	1	1	1	1	1	1	1	1	CPD-4750	CPD-4750 [ C20H33O7P2, tgt= ]			(447.4566, 22758.271)(431.96225, 7288.7812)(434.1702, 4339.65)(448.18158, 39938.35)(449.18423, 10886.267)(450.19812, 2089.18)(434.6804, 2369.508)(435.1845, 11455.8)(465.7428, 31887.174)(467.21295, 10806.89)(450.08722, 8392.738)(450.6999, 7767.26)(452.2123, 1313.98)(472.24188, 742.3485)(473.36963, 1748.888)(475.1795, 1830.03)(456.76508, 2022.684)(457.1663, 2138.44)	9.93528
CPD-685	14485072	12017308	18450568	7107987	6830705	4982605	8523425	6062648	7770418	11339979	13710029	4436603	7318875	5505989	7149028	3681196	4685874	7136051	9006954	10457327	8807202	13022958	5994102	5719344	7431932	10756685	10898973	10898973	9923830	6917554	11214140	1	1	16195141	10492654	5197784	CPD-685	CPD-685 [ C10 H18 O, tgt=99.40, overall=99.40 ]			(156.1399, 5996.51)(156.61778, 2431.2122)(137.13234, 389376.8)(138.13525, 39632.23)(139.13808, 2024.7365)(154.15894, 36086.938)(155.16217, 3947.526)	19.3511
CPD2GG-5240	132910392	80514616	84702064	75169664	71816536	5074892	80481920	83659480	74262224	8882521	109015536	73999488	160120224	39085692	74132704	92118808	143149408	55266080	133216184	158289312	145810048	210096544	132308944	81245224	71392064	76618704	177672720	177672720	1	95403168	143043728	40920812	60519608	103854728	149622848	47958144	CPD2GG-5240	CPD2GG-5240 [ C30 H46 O6, tgt=86.55, overall=86.55 ]			(502.3884, 83156.61)(503.39188, 22936.688)(504.39395, 4478.686)(505.34833, 471.9775)(486.32498, 3799.7927)(504.3374, 118009.44)(505.3406, 29510.03)(487.6994, 6171.8315)(488.13754, 5254.816)(524.611, 7537.419)(525.37573, 6954.794)(526.3776, 277.26)(506.3685, 3070.365)(526.1938, 4916.3545)(527.711, 2606.7139)(528.82214, 12146.65)(529.8283, 6434.81)(510.44724, 3409.208)(511.324, 660.3343)	26.2618
1-PALMITOYLGLYCEROL-3-PHOSPHATE	5620589	1	6369990	5725663	5632495	3828300	4436640	3356802	1	5692509	6354915	2837044	1	4852316	3235996	3755009	4556676	3267184	6976762	6404117	9778630	1	11788130	3832888	1	1	5252927	5252927	5363550	5429768	4609323	1133728	7435195	3801022	4614598	3285641	1-PALMITOYLGLYCEROL-3-PHOSPHATE	1-PALMITOYLGLYCEROL-3-PHOSPHATE [ C19 H37 O7 P, tgt=89.75, overall=89.75 ]			(410.13736, 34238.695)(411.2406, 6504.5835)(390.90607, 15777.5)(391.71478, 5708.9023)(392.21326, 2593.965)(410.51074, 37681.117)(411.4406, 6123.4214)(413.39145, 9834.275)(414.24908, 2297.816)(392.5883, 3841.5718)(395.23227, 1562.8734)(429.6062, 3437.715)(408.7494, 411.62)(433.39673, 48734.125)(435.06116, 18384.926)(435.2244, 15177.245)(435.224, 1185.35)(416.07895, 339785.53)(417.08215, 67070.984)…	10.8146
L-2-AMINOHEXANOATE	295307904	101295392	1	251434032	230941088	195804672	235831008	215686336	191783536	275715168	294995680	258240720	239166080	1	234780128	196361072	140029216	224252064	1	1	243153552	1	266924832	1	270495328	1	276754752	276754752	245229760	2745241	5746417	1	1	1	1	1	L-2-AMINOHEXANOATE	L-2-AMINOHEXANOATE [ C6 H13 N O2, tgt=98.24, overall=98.24 ]			(117.09285, 6991.155)(132.10188, 53180.605)(133.10161, 6259.419)(134.09665, 3830.618)(114.091736, 6877068.0)(115.094604, 524192.16)(116.09756, 29130.23)(153.13826, 4257.584)(158.71881, 32589.248)(159.096, 14202.57)(136.1222, 11790.779)(140.0854, 201.15)	11.3782
CPD-697	1	1	1	9135342	6326751	3168794	3455405	3168118	2974742	1	1	1	3032426	1	1	3242407	3342104	1	1	1	1	1	1	1	1	1	1	1	1	1213059	1	1	1	1	2366028	1	CPD-697	CPD-697 [ C28H48O6, tgt= ]			(485.3526, 7911.44)(486.3677, 2033.93)(463.3361, 2078.51)(465.3468, 2945.39)(465.3443, 3584.01)(469.3657, 34862.66)(501.3949, 15963.91)(502.3958, 2033.48)(480.36728, 13077.601)(481.3712, 13161.316)(482.3685, 2460.705)(504.63858, 97088.625)(505.6753, 26332.084)(506.33978, 6595.2603)(485.96027, 10607.921)(486.82977, 12982.235)(488.3318, 4607.33)(491.3483, 940.46)	19.6119
ALLOCRYPTOPINE	20908036	6436013	52063136	5602141	7421237	7152709	11625999	5358287	13891745	5686210	4149147	5840966	70952600	9383768	53753176	59666344	13626182	7229041	63805528	32737608	32159784	28473482	25899466	47993828	5468851	5487639	30755074	30755074	41976944	14034426	25651864	3914970	68097088	6769731	9471615	9336142	ALLOCRYPTOPINE	ALLOCRYPTOPINE [ C21 H23 N O5, tgt=78.38, overall=78.38 ]			(369.15265, 2190.9075)(353.03555, 3142.8418)(354.65506, 2174.06)(370.28568, 609565.5)(371.1713, 125662.266)(372.17447, 20248.766)(352.58768, 5312.2593)(353.66333, 2385.5225)(354.1644, 279.65)(388.72522, 2749302.0)(389.64606, 580614.3)(390.32788, 115283.2)(391.2779, 26545.852)(392.2035, 2718.345)(372.3226, 46986.95)(373.19034, 18899.414)(374.1944, 1578.0477)(393.70807, 7396.7085)(394.15607, 1609.8…	12.5467
CPD-698	1	17826068	28942804	34629280	25950252	32204080	16411849	56448700	21606462	4076352	5117761	2917279	28399920	36375744	19311236	21788596	15943936	16047652	35406304	51943544	40451740	56258068	68074288	50103656	1269137	1859334	5751997	5751997	83055424	1588387	6242711	1	1	29294348	26478960	42747680	CPD-698	CPD-698 [ C28H46O, tgt= ]			(398.90167, 3535.4365)(400.3614, 3984.88)(401.3628, 184.96)(381.34686, 5656.4795)(382.34967, 1558.8293)(386.02832, 1183.9434)(399.51077, 121049.945)(400.36517, 36034.586)(401.3689, 6292.5024)(402.36874, 290.09753)(381.34995, 6066.3833)(382.3524, 1384.0508)(417.19986, 3821.0808)(417.38455, 1118.905)(398.38293, 1984.4467)(421.3457, 12264.638)(422.34875, 4007.5415)(405.08783, 4242.54)(404.83563, 413…	28.9522
CPD-695	1	1	14557834	49196420	1	16226993	26053866	23965022	1	56401220	36737664	1	1	1	27557162	1	87247536	1	1	1	1	1	1	1	1	1	1	1	1	1	1	8616003	17930328	13576097	15959747	1	CPD-695	CPD-695 [ C20H26O5, tgt= ]			(346.17905, 1540.405)(328.16412, 767091.75)(329.16635, 188923.05)(330.16907, 12871.874)(351.70264, 2065.915)(330.17783, 144137.88)(331.18274, 23572.533)(332.18185, 4901.215)(333.1848, 417.18002)(334.1912, 384.66)(367.7954, 12771.365)(367.55734, 3625.55)(368.2231, 3196.38)(369.2301, 26378.37)(348.65445, 47352.39)(349.61465, 14563.38)(351.21646, 5426.4727)(369.17206, 6415.518)(352.15897, 9098.508)(…	19.41
CPD-696	2520463	1	1004313	648812	3790323	6280848	5918552	636880	2722173	2743110	3791809	2807921	4479204	7603096	1642948	2198949	1338486	1700344	1955589	2330291	3385708	10852495	1513101	916181	937879	1147817	1441459	1441459	701623	1233747	1395316	5370011	1	10786374	3322437	24918720	CPD-696	CPD-696 [ C31 H52 O, tgt=77.16, overall=77.16 ]			(441.65698, 480.20624)(443.41077, 6732.485)(444.92014, 7062.9473)(445.42108, 3389.615)(423.70697, 1957.6262)(425.68927, 2649.1816)(426.4061, 11023.83)(444.1419, 10572.381)(445.16107, 4305.655)(445.92334, 1835.3201)(446.4259, 395.28)(426.11102, 3097.829)(426.41013, 1011.39)(458.4343, 196.07445)(459.4454, 58.31)(465.43658, 2132.6606)(466.47897, 11738.636)(467.9065, 8989.567)(469.41348, 2404.1965)(4…	28.8707
CPD-693	1	2589285	2125179	3027947	3569507	4390126	2586207	3123463	2562652	3986389	2732760	2374628	2966114	4209073	1902804	2226239	1	2772765	216316880	1	2525810	313322496	34494760	6046595	1	5147254	255473568	255473568	15129209	1	2943260	1627638	3951696	197034752	248970480	75834904	CPD-693	CPD-693 [ C15H19O4, tgt= ]			(266.78073, 91589.18)(246.88351, 35987.223)(249.13062, 6777.2246)(247.1267, 889.25)(267.22598, 10203.051)(268.1475, 395.94)(247.13034, 5129.887)(251.1391, 3895.51)(282.63934, 56143.105)(283.698, 10582.555)(283.1553, 1585.99)(265.15662, 30290.557)(265.90613, 64154.67)(267.16357, 38671.605)(287.8377, 918700.7)(288.67114, 184083.62)(289.69147, 31754.406)(290.13208, 2761.555)(268.52777, 24398.291)(27…	10.7895
ETHIONINE	1206141	2381898	1142217	1718836	917860	1324913	1	1790377	1184669	2288493	1848566	2374780	1042516	4322367	1127987	1171945	693226	1660046	1703348	2097356	1	1377148	3896894	2160570	2708005	2464984	1638520	1638520	1723085	4659840	1164173	6692843	2847899	3043485	1727233	1777247	ETHIONINE	ETHIONINE [ C6 H13 N O2 S, tgt=98.64, overall=98.64 ]			(168.0657, 9144.07)(146.15569, 7016.889)(164.0739, 80735.47)(165.07709, 5653.5713)(166.07103, 3455.2349)(167.074, 351.46002)(148.06029, 25382.748)(149.06393, 1769.2195)(183.09692, 442.59857)(166.1594, 1023.52704)(189.05333, 813.6664)(171.71227, 3051.6965)	1.221
KYNURENATE	249220	229044	213746	392971	338402	342996	265905	1	215155	406820	295317	272168	283920	151118	211716	260789	243308	236225	718948	563780	738483	415263	764103	1138583	423857	775933	181519	181519	621754	859504	748059	164134	163821	601883	374470	777589	KYNURENATE	KYNURENATE [ C10 H5 N O3, tgt=69.12, overall=69.12 ]			(187.02505, 310.535)(189.03563, 58913.84)(190.1781, 4595.803)(191.04129, 1115.5621)(170.69458, 811.39667)(175.03885, 1411.965)(207.06581, 6853.204)(208.06934, 851.9267)(189.23857, 326.42908)	13.8405
UROPORPHYRIN_I	218504	259090	216253	97242	226214	118543	216008	106490	168418	241479	294441	264739	185336	238015	199619	186645	176454	163287	1	1	1	1	1	1	1	1	1	1	1	1	1	1	1	1	1	1	UROPORPHYRIN_I	UROPORPHYRIN_I [ C40 H28 N4 O16, tgt=57.60, overall=57.60 ]			(826.18036, 1878.4388)(827.1813, 944.58606)(820.1749, 3462.1082)(821.177, 722.9694)	13.8651
CPD-14404	6989967	5938357	9096226	4885253	550398	2791772	3653259	6030006	1	4845144	4428042	7219381	2227819	6393205	3008731	2826891	2399023	590640	6044445	2286805	892914	1	1	1	3279158	1	1853015	1853015	903270	1652282	3951144	244061	3041672	1	861843	1	CPD-14404	CPD-14404 [ C41 H62 N7 O18 P3 S, tgt=69.76, overall=69.76 ]			(1065.4331, 3340.3542)(1066.6527, 1854.5468)(1071.3246, 318.71)(1066.9861, 620.7525)(1071.5848, 1886.025)(1072.7688, 1724.3416)(1072.841, 2316.795)(1073.3408, 232.09)(1049.3103, 23949.725)(1050.3127, 42502.13)(1051.3817, 2410.099)(1052.6547, 2421.4307)(1053.655, 7339.7666)(1054.5968, 9322.351)(1055.3076, 8772.124)(1083.7518, 1988.335)(1085.3495, 111.52334)(1086.3514, 165.84499)(1066.1832, 3654.49…	30.0897
CPD-12299	10587055	11671773	5742994	11317685	10586143	12720202	3428211	5065797	11150177	22491564	12997314	12268117	683502	5539532	1495124	1401552	851656	5424361	1	2446318	2595138	4041213	1	1	5940608	3779192	4209982	4209982	3273175	1	15001851	15622877	14614789	1	1	1	CPD-12299	CPD-12299 [ C12 H23 O3, tgt=74.73, overall=74.73 ]			(219.172, 36708.52)(200.16393, 20096.143)(221.18806, 1483.8875)(203.17632, 26943.357)(234.91087, 6551.7393)(236.2083, 7764.77)(216.29391, 33132.62)(217.44562, 2446.3625)(218.19707, 188.46333)(240.749, 118859.57)(242.16699, 169223.39)(243.17056, 200457.08)(222.15111, 134896.36)(223.15439, 17885.486)(225.1584, 242.19)	18.7671
O-SUCCINYLBENZOATE	173280	1648124	1361241	2390375	1691778	2055896	1844828	2124870	1	1563557	1181818	1281922	1	1313576	1439410	1663292	1	1441538	1	1	1	1	107257	1150375	814523	729978	1	1	1	1344155	1	1122886	974720	1	1	1	O-SUCCINYLBENZOATE	O-SUCCINYLBENZOATE [ C11 H8 O5, tgt=80.79, overall=80.79 ]			(221.7919, 4128.5415)(203.0323, 2741.9)(205.0316, 2767.28)(223.96165, 1293.6018)(203.50963, 29047.309)(205.36926, 14432.317)(205.0276, 37.69)(239.9326, 87357.125)(240.0775, 33124.836)(241.0795, 9543.4)(221.25574, 4676.844)(223.06575, 1064.3674)(227.94922, 1291.1824)	7.15988
SUCCINYL-OH-CYCLOHEXADIENE-COOH	2520818	1002745	2066517	3341807	6110239	8588015	2180996	1	7310612	2564839	1450200	1952319	3082591	2175013	3037030	1401466	2989813	3488796	307140	1476711	165710	2526975	3283738	2041799	2340498	1353132	1000615	1000615	314961	513968	1738847	260085	1473877	1	2683781	271590	SUCCINYL-OH-CYCLOHEXADIENE-COOH	SUCCINYL-OH-CYCLOHEXADIENE-COOH [ C11 H10 O6, tgt=84.17, overall=84.17 ]			(243.0572, 444.84998)(221.04012, 1337.5599)(240.057, 513.71497)(224.05438, 206.31377)(256.0825, 30003.555)(257.0866, 3651.3625)(258.0877, 875.7225)(241.08002, 570.51)(261.07788, 3669.4304)(262.0424, 427.59)(263.0337, 115.19)(244.02675, 464.38)	2.68611
CPD-659	2151820	2370016	4683608	2141623	1880348	1286511	5249869	2694701	2597063	4522405	2857826	3569186	3236983	2571713	3863197	3107378	4398515	2763517	3376452	3666243	2966822	3889407	2742740	1335287	2751850	3859575	4717936	4717936	1812886	2096799	3154972	1835033	4344000	2911184	8056899	2191425	CPD-659	CPD-659 [ C10 H12 N O5, tgt=98.43, overall=98.43 ]			(230.53146, 966.9645)(211.60402, 1541.93)(212.966, 2940.8013)(229.08456, 865.80194)(211.63634, 1770.7318)(212.40846, 1550.5967)(246.30597, 21729.639)(246.91145, 5950.398)(247.11157, 7157.533)(228.2224, 1323.7806)(229.22481, 1838.0454)(230.10173, 2666.1733)(249.06104, 65617.12)(250.3698, 5673.7607)(251.06621, 313.886)(231.05037, 88068.055)(232.62682, 4754.21)(233.05623, 1135.9979)	15.7008
CPD-20125	1140890	2019676	1488767	5103585	1948614	944779	3876353	3574119	1182129	2558002	4626418	3444245	430834	8069710	1804989	1155688	651300	881172	710071	566457	404538	662435	723414	932243	1362720	1619423	898385	898385	495150	7058873	3288078	5053885	1064056	1501591	741863	1281591	CPD-20125	CPD-20125 [ C6 H9 O8 P, tgt=51.39, overall=51.39 ]			(241.00491, 127501.664)(242.00616, 37062.91)(243.87457, 20149.836)(244.79749, 8250.96)(245.01689, 7267.7354)(262.9906, 542.84)	1.1775
DELTA3-ISOPENTENYL-PP	431512	546515	472041	477463	465159	421984	567729	470112	434010	511728	590344	1141589	221434	425410	375385	363254	210183	401335	271342	302217	232954	263653	343618	342608	427921	295263	438342	438342	250614	471384	283945	337662	365314	1168186	336658	392791	DELTA3-ISOPENTENYL-PP	DELTA3-ISOPENTENYL-PP [ C5 H9 O7 P2, tgt=56.74, overall=56.74 ]			(225.97168, 2392.2368)(226.97452, 227.87997)(248.33379, 1143.1525)(230.75476, 52811.05)(230.99045, 78317.055)(263.22357, 46139.613)(264.0205, 4155.4814)(265.02362, 8795.02)(245.22061, 14429.452)(246.01425, 1699.6995)(247.0117, 684.68)(270.09387, 574.01184)(270.9827, 192.30168)(252.97383, 7850.699)	1.56367
OROTIDINE-5-PHOSPHATE	1	1	1	201209	1	1	1	132860	1	1	234488	187599	1	1406861	1	1	1	1	1	1	1	1	1	1	125125	192918	1	1	111150	444181	1	620322	177729	1	1	132544	OROTIDINE-5-PHOSPHATE	OROTIDINE-5-PHOSPHATE [ C10 H10 N2 O11 P, tgt=42.24, overall=42.24 ]			(367.0106, 4984.6035)(368.34683, 1794.6733)(369.0122, 1636.835)(350.33243, 496.85666)(366.0132, 3173.3071)(349.75366, 2058.1199)(351.0057, 258.34)(388.0497, 1006.83997)(392.99826, 844.9614)	7.53381
CPD-670	1	1	1	1378381	1	17652360	1	3194002	1	1	1668703	1538442	4136656	1	1	4353832	1576419	1	1	1	1	1	1	2133628	1	1	4342817	4342817	1	1	1	1	1	1	1	1	CPD-670	CPD-670 [ C6H9N3O2, tgt= ]			(156.27226, 4087.287)(160.0797, 510.67)(138.66183, 50003.914)(138.06215, 6179.205)(156.623, 10189.237)(157.0744, 200.98499)(139.625, 4663.5923)(139.075, 1048.34)(175.6544, 8211.007)(176.9452, 5329.4565)(177.1133, 2320.17)(157.09755, 678396.8)(158.10004, 36082.71)(178.0611, 3687.78)(160.55107, 2253.56)	6.96113
CPD-674	1	1180467	1209855	2443083	1622692	619766	1324206	2320960	1539342	1212352	1151867	1150220	1789251	1	1116545	935742	2126878	771013	3401502	2400852	3111944	4329446	4398108	1	1008096	1416017	1	1	2610812	1680366	3137333	1298925	5115506	1383011	3841184	1497957	CPD-674	CPD-674 [ C9H7O2, tgt= ]			(147.04381, 92477.74)(148.04758, 8570.654)(129.89207, 3174.0286)(152.56476, 2423.4973)(133.04953, 2213.6553)(135.0558, 75.33)(167.03238, 4709.499)(167.0837, 6397.67)(149.94504, 43435.977)(151.24487, 6958.3945)(152.0837, 4540.38)(172.04001, 1150.7786)	20.0669
CPD-669	6778148	9336107	1684734	2316640	2053435	1367599	2844673	2377201	5301309	1184397	1529938	2657110	5497978	1524092	2673948	3639397	8157181	899460	9200350	12467263	3218579	17925500	6674390	2129398	2617340	2584179	13133283	13133283	6904423	2869910	10383955	839332	1	8399675	1	2174241	CPD-669	CPD-669 [ C13 H18 N6 O3, tgt=68.57, overall=68.57 ]			(308.8991, 21826.326)(310.08148, 5711.478)(290.21948, 2356.221)(291.33978, 4437.304)(292.64304, 4453.0303)(293.1416, 1155.49)(310.47424, 17563.068)(312.16608, 4377.009)(293.41498, 3366.1973)(294.1546, 2705.84)(324.89667, 10138.62)(327.34943, 12971.258)(308.7039, 15740.412)(310.17648, 4386.0)(310.1783, 5364.27)(331.8549, 1380.0814)(332.13824, 1937.1399)(332.1359, 6428.01)(312.06766, 4862.3047)(316…	18.6999
THIAZOL-YL-INDOLE	1582677	1227905	250646	1065404	1177712	802674	1081001	823116	450609	896228	1224518	1035043	1	1276094	1058548	417504	1938949	251495	1	1	514168	656538	1	328634	914533	1795061	162681	162681	480815	1233456	1	810106	679312	1	406588	960032	THIAZOL-YL-INDOLE	THIAZOL-YL-INDOLE [ C11 H8 N2 S, tgt=47.44, overall=47.44 ]			(201.00536, 21273.104)(204.03992, 978.1433)(204.04968, 1661.3953)(205.549, 1647.6152)(220.25262, 31807.805)(225.02669, 3003.2417)(224.02797, 3164.3567)	6.34691
CPD-14405	31045170	28397022	8194872	13960947	11803286	14229974	22104428	20661312	6461675	36483020	26416588	32611496	33693760	17564536	17359706	20114344	4849793	6857676	30599104	7510340	1396305	1	1349982	2941666	2557831	3501889	2556907	2556907	5149065	1222775	7360250	2725728	16548972	2833108	8873051	1811211	CPD-14405	CPD-14405 [ C41 H64 N7 O18 P3 S, tgt=71.34, overall=71.34 ]			(1049.3677, 18708.049)(1053.3088, 2962.92)(1054.3118, 5730.3203)(1092.3158, 4123.2446)(1093.3195, 686.8262)(1094.3151, 504.9681)(1097.3179, 476.66)(1050.3134, 35487.93)(1051.3105, 2927.685)(1052.3091, 1355.3049)(1053.3092, 621.24)(1067.4231, 4122.152)(1072.3394, 852.33997)(1073.3413, 367.31)(1074.3381, 1031.59)(1086.3058, 1807.0355)(1086.3541, 17.81)(1073.321, 418.215)(1068.3416, 16699.928)(1069.…	30.4326
CPD-13370	8892904	10173688	6405021	11092165	11139996	25682810	10435278	11578047	8520069	11848327	17476218	11973968	37927476	19435934	10777548	10269016	6911947	14441794	5574185	9179263	6883763	15139169	6787841	1	3182686	15065058	10710018	10710018	6654797	11695296	2998374	5569270	1	8167238	5478439	4442115	CPD-13370	CPD-13370 [ C9 H10 O2, tgt=87.79, overall=87.79 ]			(152.54385, 5323.0107)(137.073, 958.635)(151.07582, 133396.05)(152.22586, 20897.316)(153.07977, 2359.2869)(133.06506, 171756.12)(134.06833, 21319.81)(135.0702, 267.22)(168.10295, 17856.604)(153.57118, 10661.678)(175.1555, 2283.0967)(177.07031, 2918.405)(155.04736, 144668.84)(156.47977, 2639.7312)(157.05125, 590.67)	17.8605
CPD-14426	1161871	1026256	1114225	610686	521105	1	147244	720813	1	83846	1306862	1787806	1	200134	1	114074	1	175997	1	1	1	218496	1	1	147834	1	231331	231331	1	1	131743	1	1	1	1	1	CPD-14426	CPD-14426 [ C43 H64 N7 O17 P3 S, tgt=69.79, overall=69.79 ]			(1076.5879, 1311.6825)(1057.8116, 411.14502)(1061.3093, 410.53)(1079.448, 2243.8145)(1080.4827, 1773.2328)(1081.5417, 2473.266)(1083.3534, 6774.263)(1063.0983, 4039.7314)(1065.3239, 7528.4355)(1097.6165, 675.45)(1100.372, 612.54)(1075.9196, 1751.4329)(1077.6064, 950.9825)(1098.8167, 3500.3562)(1100.3204, 687.76996)(1101.3228, 435.00333)(1082.3184, 757.57)(1083.3195, 272.09)(1084.3135, 981.57)(108…	26.7111
CPD-14425	5180731	4809161	1	881889	2058084	2184732	2811035	2941526	1046747	3096228	4445038	6723293	1214902	2145493	2121068	1620314	1066294	1038718	2774884	993973	1	1134698	739453	1	1487309	256176	1486526	1486526	199143	1530241	1	888322	1502133	306811	390410	1	CPD-14425	CPD-14425 [ C43 H62 N7 O17 P3 S, tgt=54.57, overall=54.57 ]			(1077.6195, 526.29144)(1055.3077, 7689.8223)(1056.3102, 1584.4921)(1057.3113, 253.358)(1077.3352, 3062.0374)(1079.3347, 2000.95)(1080.3341, 667.06)(1059.0314, 1447.8872)(1093.2172, 607.95575)(1096.3586, 727.13)(1098.344, 3413.14)(1074.0276, 4908.7827)(1075.7817, 1135.2555)(1078.3326, 1850.0422)(1079.3345, 1439.39)(1080.3347, 95.315)(1098.9823, 369.8425)(1101.1527, 1101.8083)(1102.9795, 1567.8633)…	28.7734
CPD-14424	3445030	3582368	2031415	1527338	904767	125347	2016809	99881	160608	1	3972715	5884818	460336	1133274	1134425	1213441	1	858257	632884	192348	1	454683	240135	1	215193	236718	332234	332234	1	1	135581	921732	757572	450017	1	1	CPD-14424	CPD-14424 [ C43 H64 N7 O18 P3 S, tgt=50.58, overall=50.58 ]			(1092.2383, 5211.634)(1093.4122, 683.90546)(1094.5712, 846.7562)(1097.3431, 945.93005)(1098.321, 339.55)(1076.5479, 357.28552)(1092.3198, 18548.916)(1093.3226, 2794.0876)(1094.3165, 1465.9917)(1077.4226, 2031.6337)(1078.9336, 3003.7)(1079.8344, 908.7575)(1080.335, 97.1)(1093.0701, 673.42004)(1114.4813, 1699.84)(1115.3115, 337.62332)(1098.3163, 3534.67)(1099.863, 4695.8833)(1102.2166, 20588.408)(1…	25.5595
CPD-14423	1144584	969362	548861	220638	88527	1	241852	168545	158790	571777	1296385	2186529	1	118251	1	129348	1	1	1	519851	314054	973215	517368	303514	557858	530496	839130	839130	1	1	1	1	1	1	1	1	CPD-14423	CPD-14423 [ C43 H62 N7 O18 P3 S, tgt=66.98, overall=66.98 ]			(1089.3229, 294.09)(1072.2971, 535.355)(1092.6255, 19133.072)(1093.3192, 3024.096)(1094.3157, 1104.775)(1097.3179, 963.18)(1074.5607, 297.4925)(1107.4133, 5231.7793)(1108.333, 2214.497)(1109.3281, 881.6557)(1110.333, 282.53)(1090.0992, 696.51746)(1112.506, 4432.7773)(1113.3148, 2000.421)(1101.3147, 189.84)	26.2018
CPD0-1242	1	1910795	1421031	1535336	1641669	1571063	1729507	1105713	2328103	1	1419013	1	1483716	1951875	1766898	1627370	2124388	1499098	2148985	2035066	2369205	1822316	1	1	2137555	1796340	2707365	2707365	1	1	1495182	2184473	2533442	2316748	2478338	1	CPD0-1242	CPD0-1242 [ C11H14O2S, tgt= ]			(212.00156, 2519.1223)(212.57095, 2500.8037)(213.07127, 431.18335)(196.72942, 3784.25)(197.0634, 25285.31)(214.41576, 4468.3545)(193.06837, 40911.688)(194.07233, 6352.406)(195.06691, 2562.535)(196.07736, 100.588)(229.6402, 6476.1177)(229.76768, 3021.7087)(211.66504, 165.3093)(212.0927, 30019.363)(213.09375, 5704.8604)(233.06087, 11189.34)(234.3975, 137.22333)(215.3195, 687.76697)	15.3212
CPD0-1240	5190923	1087153	1401628	1097649	1520556	2265369	941092	1542518	1069938	542806	496227	740244	1327321	555128	918499	1869815	1509290	1730477	535173	732241	1038302	1265843	2454292	764424	790372	716069	832516	832516	2427301	1383648	1812540	1325234	820584	1352186	1011746	830428	CPD0-1240	CPD0-1240 [ C6 H14 F N2 O2, tgt=75.19, overall=75.19 ]			(166.91942, 16918.678)(147.51617, 3466.974)(149.09647, 186104.34)(150.43439, 26824.639)(152.10677, 45611.76)(169.63805, 34611.773)(151.53593, 36403.484)(187.14684, 41197.086)(168.40648, 13179.571)(188.13072, 17768.783)(189.09065, 1094.6215)(190.08551, 574.005)(170.0821, 28675.494)(171.08223, 2196.4387)	3.90922
CPD0-1245	20609168	18209180	14758121	31020342	19377812	25159176	19049790	27968688	21550372	14434510	11903287	11772978	18674672	16533256	18491544	22228276	14346264	18175392	12040042	317643	13103865	271001	11932995	16952850	11084464	910003	10080521	10080521	1622591	11907557	9895229	325206	8352915	13279691	12518944	12370539	CPD0-1245	CPD0-1245 [ C5 H11 N O5 P, tgt=80.76, overall=80.76 ]			(198.04335, 424.51)(178.0266, 227.33)(198.45528, 1093.1592)(201.20284, 17984.924)(202.05635, 46133.133)(182.22382, 4517.7075)(180.03903, 481.77002)(215.32358, 4131.184)(215.07158, 11249.87)(197.98798, 2324.9917)(219.02686, 409317.2)(220.03026, 26655.852)(221.0265, 38724.914)(205.02626, 258.01)	2.45169
CPD0-1246	3654661	4429609	2866428	4440553	3035510	4061607	638494	390439	498968	963705	3351124	3286014	2761495	6670130	2524454	1	4460764	3025368	6095798	8958434	8542577	1	4030815	3593672	7943516	7719613	10532184	10532184	438350	763453	5468890	7321499	1	8124495	6981621	8800125	CPD0-1246	CPD0-1246 [ C8 H15 N O4 P, tgt=95.29, overall=95.29 ]			(225.0867, 136.27)(204.25078, 3830.9539)(205.07062, 1749.7133)(221.08122, 206300.98)(222.08466, 26630.88)(223.08052, 1510.102)(203.071, 8216.47)(204.07176, 1334.8516)(205.06923, 406.70334)(240.92593, 1689.5419)(242.22714, 1405.681)(242.83093, 1968.8722)(243.11726, 4885.53)(223.75821, 2347.0994)(225.111, 602.69)(245.81934, 5495.7866)(247.5763, 2424.9014)(248.0778, 667.42)(230.06664, 888.0867)	12.8387
CPD0-1244	81255216	56011344	11461973	5460275	15032843	3781857	20012552	5365386	14079884	23112286	30363308	7456226	14422698	55659448	51812864	59673988	1	6611877	26776148	32734418	59113152	43489920	12902799	8059608	9650758	14513416	21584480	21584480	18031468	13945813	12211614	16964738	13365758	13899628	33194280	30901760	CPD0-1244	CPD0-1244 [ C25 H33 N3 O3 S2, tgt=55.62, overall=55.62 ]			(488.2458, 14543.675)(491.94235, 4419.5425)(469.35104, 1841.1881)(470.18857, 399.29333)(491.67123, 10928.086)(492.5025, 6060.7197)(493.064, 13419.884)(472.3886, 8647.02)(473.5508, 5800.9536)(474.36462, 9006.897)(507.30496, 37675.883)(509.43295, 12411.66)(509.2316, 15300.26)(511.2322, 3888.6)(489.47153, 12863.371)(490.36597, 2360.7224)(512.3603, 5731.0547)(514.1825, 9619.413)(515.021, 3767.93)(514…	18.5566
CPD0-1248	1808521	939407	2266307	1393417	1178243	1	1	1196263	1695814	1599224	1	1	1	1184377	1	1	1	1	1	1	1	1	2611985	1	1	3870501	3580349	3580349	2861197	1	2574658	1720958	4512915	1	3260982	1	CPD0-1248	CPD0-1248 [ C6 H13 N O4 P, tgt=82.71, overall=82.71 ]			(198.06857, 993.38605)(195.37866, 21103.5)(196.06927, 2351.5518)(197.0738, 171.8)(177.05467, 98067.484)(178.05829, 10357.102)(179.05734, 306.255)(214.76495, 3613.4285)(214.87404, 7644.8003)(216.49887, 17116.924)(196.68864, 3456.899)(198.09015, 2108.5781)(218.0498, 217.73)(221.06, 2093.93)(201.0436, 7109.822)	21.2038
CPD-10893	1371916	1164841	1281735	1027326	793832	721300	936134	1	739334	2200815	1	1580489	2559608	1	2360213	1023823	1112989	1017979	927206	1581207	1194398	1582934	1380482	1462299	1129791	1469941	1998733	1998733	1198039	1262471	1098104	1	1901847	1891801	708412	1407432	CPD-10893	CPD-10893 [ C15 H7 O16 S3, tgt=40.66, overall=40.66 ]			(526.88745, 5301.052)(527.8903, 806.88574)(558.918, 4693.105)	29.0251
CPD-14431	1	1	1	761983	612834	297271	1	1	429740	574400	437737	1	1	416801	1	269685	1	1	268181	1	181494	1	1	198473	1	149555	1	1	1	273074	1	516971	568937	402110	336048	1	CPD-14431	CPD-14431 [ C15H16O9, tgt= ]			(343.97675, 18213.64)(344.84457, 27185.863)(325.96786, 1033.3167)(326.83157, 4061.9778)(327.07983, 7192.8203)(342.42468, 777075.44)(342.0889, 1882.17)(359.1151, 4397444.5)(360.11697, 2297316.2)(361.1188, 514496.34)(362.12106, 63996.582)(363.124, 6482.697)(344.1112, 512.32)(367.07816, 5152.974)(368.0832, 1049.896)(345.06168, 9601.007)	20.6571
CPD-14430	1884679	1489052	1250895	1134055	1310757	1223566	1125891	858287	1033847	1650815	1203909	1427766	1447325	1274981	1527915	978173	1364709	1007474	3260814	2970840	3190861	3381631	3058095	1999319	2180635	1960476	2327215	2327215	2439407	3766691	3295134	981244	1851084	3971003	2720301	2210369	CPD-14430	CPD-14430 [ C10 H8 O4, tgt=85.14, overall=85.14 ]			(194.04536, 494.03333)(175.03569, 1628.2867)(196.06009, 169.785)(175.03677, 518.91394)(212.73279, 325.08847)(192.0659, 46488.547)(193.06932, 4923.1797)(194.08055, 380.99414)(217.03384, 975.19)	5.32656
CPD-10894	653311	807434	762374	667917	479366	695982	1052950	997355	701437	1031447	971198	939790	456204	405794	402231	771434	459920	520026	355515	324860	413362	362547	197826	456675	356018	916230	331488	331488	125618	359119	241293	574457	308826	341507	351886	251517	CPD-10894	CPD-10894 [ C15 H6 O19 S4, tgt=59.05, overall=59.05 ]			(637.8714, 26895.127)(638.87476, 7629.3237)(641.75476, 3490.142)(642.7573, 1237.184)(642.86884, 1020.70496)	23.2848
CPD-14434	1	1	1	761983	612834	297271	1	1	429740	574400	437737	1	1	416801	1	269685	1	1	268181	1	181494	1	1	198473	1	149555	1	1	1	273074	1	516971	568937	402110	336048	1	CPD-14434	CPD-14434 [ C15H16O9, tgt= ]			(343.97675, 18213.64)(344.84457, 27185.863)(325.96786, 1033.3167)(326.83157, 4061.9778)(327.07983, 7192.8203)(342.42468, 777075.44)(342.0889, 1882.17)(359.1151, 4397444.5)(360.11697, 2297316.2)(361.1188, 514496.34)(362.12106, 63996.582)(363.124, 6482.697)(344.1112, 512.32)(367.07816, 5152.974)(368.0832, 1049.896)(345.06168, 9601.007)	20.6571
4-AMINO-BUTYRATE	743528	1	1	435984	404933	399245	1	1	332629	764702	602425	557887	815593	1	353061	488966	1012978	670779	524267	851618	1	511326	1	1	712475	1	762793	762793	1252579	1	544867	1	1	828615	450969	1	4-AMINO-BUTYRATE	4-AMINO-BUTYRATE [ C4 H9 N O2, tgt=87.41, overall=87.41 ]			(104.070885, 56076.594)(105.07134, 2527.2588)(106.06625, 4044.4)(125.10715, 6149.1206)(126.053764, 2312.7324)(110.89117, 5322.1187)(112.05096, 23504.67)	1.50589
CPD0-1251	4031435	7953340	36894732	61092004	1	26467008	49890004	48547976	1470998	57595864	39207212	35476092	17501196	30140712	1898037	26050208	4449502	36428496	6618072	12998583	16984038	19132012	12770370	4938098	6489504	1	9427105	9427105	1	4510698	4867051	3265589	7331614	3464339	19865590	5637426	CPD0-1251	CPD0-1251 [ C15 H15 N6 O3, tgt=76.40, overall=76.40 ]			(330.44016, 1755.7695)(331.68326, 3299.0542)(312.43915, 3109.8538)(313.42584, 3865.8525)(314.1183, 2042.59)(328.93134, 705.568)(311.01093, 1142.0388)(348.2284, 3320.981)(350.1705, 794.15)(353.29953, 13876.931)(354.21664, 5391.8013)(355.1185, 4664.25)(335.9281, 58266.363)(337.04523, 10119.427)(336.1105, 26421.69)(337.1151, 3894.84)	22.2314
CPD-14428	1	1	1	761983	612834	297271	1	1	429740	574400	437737	1	1	416801	1	269685	1	1	268181	1	181494	1	1	198473	1	149555	1	1	1	273074	1	516971	568937	402110	336048	1	CPD-14428	CPD-14428 [ C15H16O9, tgt= ]			(343.97675, 18213.64)(344.84457, 27185.863)(325.96786, 1033.3167)(326.83157, 4061.9778)(327.07983, 7192.8203)(342.42468, 777075.44)(342.0889, 1882.17)(359.1151, 4397444.5)(360.11697, 2297316.2)(361.1188, 514496.34)(362.12106, 63996.582)(363.124, 6482.697)(344.1112, 512.32)(367.07816, 5152.974)(368.0832, 1049.896)(345.06168, 9601.007)	20.6571
CPD0-1252	26926364	45426848	3863169	11279473	20820784	21919708	6523273	5659446	31135012	25697096	21058864	7538575	13876504	14667998	17513132	15344119	9613378	14169720	2873033	9448193	5132265	4029098	5037280	3738378	4298467	24990850	5270167	5270167	7444871	4313925	47944244	12364575	18803358	18584896	20423824	7596447	CPD0-1252	CPD0-1252 [ C14 H12 N5 O3 S, tgt=75.67, overall=75.67 ]			(330.07016, 8543.405)(315.17804, 3417.9863)(316.55685, 4152.39)(316.46524, 1318.1619)(315.5697, 528.03)(350.64328, 1155.5446)(354.10336, 868.46497)(332.0858, 105885.68)(333.08905, 19383.805)(334.0901, 2943.9285)(357.06107, 894.62335)	18.9751
CPD-14429	297937	1	780227	761983	612834	297271	388233	413035	429740	574400	437737	810113	773806	416801	1	269685	305869	490591	268181	441748	181494	361615	334176	198473	814522	149555	375085	375085	313840	273074	1	516971	568937	402110	336048	1	CPD-14429	CPD-14429 [ C15 H16 O9, tgt=66.75, overall=66.75 ]			(343.78714, 10391.455)(344.92856, 29190.494)(326.2799, 1036.5653)(326.88092, 5242.007)(327.07983, 7192.8203)(342.70752, 464947.47)(343.3868, 5979.17)(343.0859, 314.65)(323.07455, 12793.433)(324.0772, 2217.0103)(325.07333, 293.91666)(359.1147, 3631195.0)(360.11682, 1754812.9)(361.11862, 352574.78)(362.12106, 67127.76)(363.12405, 6712.691)(344.44724, 349.79333)(366.35062, 4579.209)(368.0832, 1049.8…	18.1424
PALMATINE	1673763	1	1722108	2638260	3419691	3260779	3740271	4051382	1866492	5775285	2051839	2260219	1881989	2770403	1355923	3213335	3227165	2838377	3100941	3646243	3573812	3695162	1107067	3321610	3374803	3331855	1720695	1720695	9941726	1	1346150	3862444	3328847	3682052	2116109	2744449	PALMATINE	PALMATINE [ C21 H22 N O4, tgt=72.10, overall=72.10 ]			(353.0324, 12297.652)(354.16028, 9323.03)(355.15976, 5080.785)(356.1633, 301.24)(335.8998, 20284.494)(336.15027, 8639.935)(339.1547, 1403.22)(354.3039, 35616.49)(354.16455, 3342.8792)(336.27216, 17497.842)(336.56866, 5687.387)(337.5745, 2707.5574)(372.89368, 46041.746)(374.03186, 13117.223)(375.11978, 16911.518)(375.2025, 9061.05)(353.56943, 38635.25)(353.89594, 13306.911)(354.1835, 6089.92)(377.…	12.8004
CPD-6801	1	1	1494192	761970	1	1382333	1700880	1247429	1757029	1374600	2356642	1	1245606	848010	623819	1571684	2155795	999129	836801	1914563	1647867	4463225	1814401	1917347	562345	665800	792697	792697	1287487	2152799	912253	1345506	462250	727515	1652884	1469488	CPD-6801	CPD-6801 [ C13H12O4, tgt= ]			(232.50269, 5425.2163)(233.17715, 942.61194)(214.34987, 14622.827)(215.4834, 1945.2858)(217.07095, 794.265)(235.35373, 3009.116)(238.0948, 522.11)(217.30402, 14452.465)(216.0687, 2072.68)(217.06955, 1516.1101)(250.68161, 30321.443)(251.11156, 7530.4146)(252.10518, 1560.1721)(232.63261, 19558.385)(234.49988, 4815.688)(234.84618, 1538.46)(237.05247, 368.38998)	10.4031
CPD-14445	177649072	161989344	130951032	122673432	96244536	109812272	5527733	102788912	116902656	84681408	77457600	6773795	148304512	7949825	132139808	4525018	116104280	56303864	130625664	127371936	122278992	8556513	108746640	5233365	11349302	82869496	1	1	92434368	69395288	99906704	1	1	91245768	93070528	43057972	CPD-14445	CPD-14445 [ C14 H26 N8 S2, tgt=61.65, overall=61.65 ]			(370.3556, 447744.94)(371.37817, 90447.1)(372.17462, 16525.242)(375.17682, 251218.45)(376.18027, 46455.984)(390.20316, 111798.02)(391.70163, 25824.053)(393.20145, 13445.884)(394.1972, 290.91)(397.49234, 5240.235)	14.1016
CPD-13396	5054503	8148908	5552203	2466848	5195191	2276886	4327380	3192591	6526761	7680446	4502833	3612855	8044289	2136953	4059673	3592792	3343583	3232966	3827209	4297223	5244071	6742087	5567680	6040744	7715362	6489556	5144790	5144790	4723536	4989211	2845016	2784263	6934768	7068156	11680768	3848735	CPD-13396	CPD-13396 [ C15 H24, tgt=99.59, overall=99.59 ]			(205.1953, 222601.1)(206.19841, 39264.14)(207.20212, 2387.3286)(222.22179, 1756.0905)(223.22415, 204.52)(227.1756, 16682.682)	26.6223
CPD-14443	2515344	2807147	1877613	2296224	212924	2672049	1893111	2025258	199725	272248	2228461	142847	2613707	1377908	2511542	2112010	1292132	3277544	1811408	1163696	1395145	1453148	1704812	1919788	1602259	1	959634	959634	2092028	2499705	258543	1	1425086	1251728	1195159	2235883	CPD-14443	CPD-14443 [ C7 H7 N O5, tgt=68.23, overall=68.23 ]			(186.41832, 33048.5)(187.14156, 1997.7876)(187.03133, 2992.1968)(188.0358, 176.3)(168.19115, 3739.6458)(187.0428, 2303.543)(170.28674, 883.05994)(204.28717, 1993.688)(205.06935, 1228.0492)(208.0754, 199.56)(187.56123, 4087.7537)(212.0333, 18664.99)(190.29143, 5134.432)(191.01518, 235.65498)(192.0105, 218.33)	3.37722
CPDQT-409	17541864	7875070	18487468	16497825	21180308	21728140	6079868	18419764	11014855	17673974	20832342	18177098	28061204	25279756	21564252	22325464	26123916	23008728	16524233	1	17807914	5533247	1	8550570	5165637	4913724	3545260	3545260	6042697	14886041	15479799	8203015	6223788	8150017	3479365	9069687	CPDQT-409	CPDQT-409 [ C12 H24 N2 O3 S2, tgt=60.79, overall=60.79 ]			(311.00137, 3192.1492)(312.64923, 3768.1396)(311.12024, 539.77)(292.8289, 10511.794)(293.2927, 2567.6445)(294.96475, 2774.8972)(295.1065, 5086.98)(311.6298, 3157.3242)(292.92664, 1758.9319)(292.99396, 1876.3237)(294.61346, 156.945)(297.1154, 887.74)(328.0112, 138636.53)(329.1567, 21772.904)(330.9018, 306.33252)(331.1533, 158.71)(311.24332, 20654.42)(312.13947, 24351.92)(334.64227, 14762.03)(336.4…	7.89436
CPDQT-408	2390779	7370043	1	1606572	1	1	2385343	5433290	6842144	4005427	2343439	1798804	2510038	2884760	3933369	2927041	1	3537258	14612036	18946544	12622505	3202167	16142948	6691764	6340223	4633722	3277563	3277563	4543891	7780268	12097221	4386997	2547110	1	4274919	11559687	CPDQT-408	CPDQT-408 [ C11 H22 N2 O3 S2, tgt=63.71, overall=63.71 ]			(296.31702, 1798.1475)(298.20236, 280974.5)(299.1004, 327590.5)(278.96158, 4039.0486)(279.0948, 2905.47)(297.11444, 3267.544)(298.66537, 1274.6685)(300.51166, 4596.394)(301.1108, 3936.5166)(277.4, 6669.4536)(278.11066, 1293.14)(315.85306, 7303.3125)(315.39618, 1349.085)(318.1428, 249.26)(296.04752, 5763.7173)(300.1305, 205.17)(321.09686, 18391.795)(321.64282, 27714.086)(319.10907, 3147.99)(302.31…	10.5867
CPDQT-407	3070082	1	2388164	3478810	1	9466259	2942416	2285183	2378105	1496844	2048302	2302693	7284126	1103276	1666226	1	1	1390570	921747	1	1171488	1	1	1	1	2620396	1	1	1	1	4473529	2353834	1	1	35594120	2931973	CPDQT-407	CPDQT-407 [ C10 H20 N2 O3 S2, tgt=60.11, overall=60.11 ]			(282.48782, 580.35)(264.07776, 907.85)(283.2571, 12658.658)(286.2962, 11642.387)(287.09656, 10602.42)(263.67325, 8078.765)(265.0863, 2234.79)(268.0824, 252.57)(303.02432, 4592.7256)(302.1192, 3292.81)(283.77917, 3754.1416)(284.2758, 13786.712)(285.11386, 2014.4634)(303.08347, 12485.97)(304.08224, 3325.495)(305.0944, 607.09)(288.53177, 9686.427)	11.2707
CPD0-1263	1	107051	1	246433	100353	1	187656	175050	1	122900	225889	182909	1	438279	93113	1	1	1	1	1	1	1	1	1	1	1	1	1	1	1	1	1	1	1	1	1	CPD0-1263	CPD0-1263 [ C8 H4 O6, tgt= ]			(200.00793, 2090.21)(178.9956, 2633.09)(198.00972, 6751.861)(199.01147, 443.3775)(178.9962, 238.65)	1.17811
CPD0-1264	2234339	3064509	1	1021735	2029058	847007	1	1	1	1859491	1	1675817	2124912	1546889	1853269	2176090	3098320	1617830	1	1948179	1503062	1906540	1818011	1329166	3349953	1634401	3731415	3731415	1921832	2058445	2028367	1169125	1	2559795	1970710	1276093	CPD0-1264	CPD0-1264 [ C8 H12 O4, tgt=80.48, overall=80.48 ]			(173.24966, 11873.595)(155.92278, 4977.415)(173.37732, 20385.33)(174.08165, 5460.025)(156.35023, 4041.774)(158.3652, 4679.657)(159.0808, 1243.3)(192.49315, 15242.985)(193.61597, 8370.823)(192.1022, 150.0)(172.09654, 14752.063)(198.22104, 12692.947)(198.35786, 4473.897)(197.0737, 237.88)(177.12137, 31628.639)(178.0583, 3131.5684)	13.9377
DOPAMINE	22103402	30112768	16438694	15712495	17323970	21717024	16406768	13235519	1	1	18938000	12544759	1	18929354	1	1	27026466	13201282	1	1	3155106	1	1	1	1	1	1	1	1	1	1	1	26258854	1	1	15216295	DOPAMINE	DOPAMINE [ C8 H12 N O2, tgt=87.78, overall=87.78 ]			(154.08672, 21945.715)(155.08018, 1495.499)(136.07584, 602209.25)(137.07877, 58199.324)(157.16017, 1097132.6)(158.1005, 113455.95)(176.12857, 974849.06)(177.13115, 101455.03)(158.61992, 422595.94)(179.20624, 977.315)(180.39738, 3475.9202)(181.08801, 6219.3286)(181.75703, 4119.9766)(161.88556, 7788.5737)(163.07503, 25048.451)	6.9325
6-OXO-HEXANOATE	1384955	7918061	2601110	898699	1	874047	398048	987412	1801341	2993283	3757934	2921211	903408	2806253	963226	918098	1	539865	1541507	1542617	530787	1496866	2840036	1130527	10988822	708901	8396991	8396991	815582	1200985	2453691	822948	2644883	1331619	1520620	705148	6-OXO-HEXANOATE	6-OXO-HEXANOATE [ C6 H9 O3, tgt=83.01, overall=83.01 ]			(131.65002, 79291.086)(133.06554, 8165.8716)(134.06665, 694.0319)(111.04414, 13673.905)(112.0511, 1433.8058)(131.09819, 52124.113)(113.74761, 7930.078)(113.06015, 4375.865)(149.15407, 15330.151)(150.59723, 5813.043)(131.14557, 26912.518)(152.26654, 383.28665)(138.0457, 483.595)	13.812
CPDQT-406	7095027	3230159	3249654	3594892	2343743	3227029	4859810	4421980	5060133	4892647	5491807	4162816	2958904	5991847	1	3106401	3979801	1	5417984	1	6353451	4958518	10585335	4029189	4223219	1	8184470	8184470	1	3107613	7011335	3804324	4334948	6476458	6055428	3893514	CPDQT-406	CPDQT-406 [ C9 H18 N2 O3 S2, tgt=58.11, overall=58.11 ]			(269.0728, 757.115)(250.0649, 3122.4238)(251.0663, 465.51)(270.50888, 1507.5829)(250.9059, 1619.1217)(252.0741, 432.14)(284.87558, 9161.384)(285.61664, 1151.1743)(288.1047, 2278.13)(268.0945, 1561.2432)(269.869, 478.74777)(272.0936, 841.29)(294.62146, 7882.563)(291.5681, 28100.186)(295.0642, 3568.55)(273.04956, 1459.095)(276.05225, 352.485)	15.4443
CPDQT-405	45941360	78518384	19514076	44320720	48337704	66542924	34834396	20379060	11594551	15981212	55598904	80123504	72263480	181647152	9590492	23463816	69333432	67001700	19608648	4607547	3825170	4264242	7294599	59384048	102360312	1	6385918	6385918	2203619	127647776	25137736	137001504	3488078	61787232	29050736	26392864	CPDQT-405	CPDQT-405 [ C8 H17 N O S, tgt=69.01, overall=69.01 ]			(177.66545, 4088.4712)(160.82576, 14443.487)(159.58763, 1859.1217)(176.48094, 21791.186)(177.7091, 3446.793)(179.1089, 770.07)(158.69945, 28703.877)(159.19016, 30603.941)(195.99283, 17515.041)(196.80219, 56263.27)(197.13449, 66821.42)(176.55562, 272062.03)(178.37465, 3950.3848)(179.1282, 3017.81)(199.4913, 4827.6245)(200.31151, 17890.29)(202.09084, 13801.966)(182.27098, 44702.492)(183.39291, 9890…	11.633
CPD0-1269	168465	375315	115973	1230077	1	143076	973956	867480	195174	446739	1414225	955816	1	1727337	383842	1	1	134390	1	1252261	1	146200	1	136484	187289	221640	1	1	466198	1340681	1	1324648	142618	153494	179417	1	CPD0-1269	CPD0-1269 [ C8 H9 Br O4, tgt=46.87, overall=46.87 ]			(252.97386, 5773.513)(253.97806, 220.915)(234.9632, 1844.1288)(252.64561, 2628.8318)(230.96817, 1702.8724)(269.0002, 1155.03)(251.74469, 16070.336)(272.95776, 16808.87)(273.96036, 2080.355)(254.19896, 487.74838)	1.18289
CPDQT-404	1	2557676	3595028	2906817	4088991	3723145	1	2301017	1	1	1	2062667	2725725	1	1	2059190	3164945	1	1	1	1	1	1	1	1	1	1	1	8177269	1	1	1	1	1	1	7186860	CPDQT-404	CPDQT-404 [ C8H17NO2S, tgt= ]			(192.67178, 1427.2045)(174.42322, 20635.87)(178.08788, 4148.384)(193.43849, 6114.3765)(176.09454, 8939.4)(210.13258, 48589.95)(192.95374, 15168.476)(194.70418, 34559.516)(195.12271, 40415.492)(214.25401, 1546.2852)(215.48572, 469.862)(218.0849, 13525.73)(198.49274, 1954.1351)(199.96466, 1888.0377)(200.0756, 7317.38)	11.4414
CAPSAICIN	19198956	1	15084043	47070696	57838688	38190072	54956232	39292900	133000704	1	8807604	38298472	59767788	52641384	33932596	41509196	87869792	28476764	1	12568127	73559536	1	1	426122656	26738672	24669546	58311480	58311480	1	12300481	20079248	19107636	362436256	270824352	102757944	5058066	CAPSAICIN	CAPSAICIN [ C18 H27 N O3, tgt=74.00, overall=74.00 ]			(305.96576, 477418.25)(306.61945, 86469.945)(308.207, 12244.061)(310.2088, 3172.93)(289.1085, 152007.12)(290.05157, 124670.375)(291.53256, 65147.926)(292.2013, 81654.48)(306.9605, 51865.418)(307.37054, 24111.516)(308.21188, 1150.1434)(291.583, 20971.56)(293.21024, 50838.984)(323.67294, 2878.763)(324.24353, 1868.64)(308.46518, 3298932.8)(308.233, 1851.57)(310.2364, 383.64)(330.65707, 122471.49)(33…	21.8272
CPDQT-420	482038	932206	402704	553957	649867	531449	1184050	1147003	370337	1136077	973208	470044	462631	1324738	1051788	532160	842141	433201	765551	552653	680117	531273	692122	674143	961199	636363	669389	669389	405811	672935	329795	602830	851688	1009773	1591360	439014	CPDQT-420	CPDQT-420 [ C14 H26 N O9 S3, tgt=79.50, overall=79.50 ]			(432.06387, 435.58112)(455.0861, 357.73666)(431.57452, 707.52)(473.10703, 1179.9418)(451.09772, 115864.586)(452.1011, 23693.041)(453.1005, 9849.298)(454.5963, 486.03998)(474.56485, 172.51001)	15.5989
CPD-14453	1884679	1489052	1250895	1134055	1310757	1223566	1125891	858287	1033847	1650815	1203909	1427766	1447325	1274981	1527915	978173	1364709	1007474	3260814	2970840	3190861	3381631	3058095	1999319	2180635	1960476	2327215	2327215	2439407	3766691	3295134	981244	1851084	3971003	2720301	2210369	CPD-14453	CPD-14453 [ C10 H8 O4, tgt=85.14, overall=85.14 ]			(194.04536, 494.03333)(175.03569, 1628.2867)(196.06009, 169.785)(175.03677, 518.91394)(212.73279, 325.08847)(192.0659, 46488.547)(193.06932, 4923.1797)(194.08055, 380.99414)(217.03384, 975.19)	5.32656
DEHYDROSPHINGANINE	71183824	103209248	91939368	2915496	246463312	115762864	151731568	9121729	80657168	1876975	43530176	118365792	209030576	7649094	87431488	94006760	139812416	231519888	161485456	3219707	2658745	10534677	130222488	78738800	80937712	2789982	57646052	57646052	64466192	114578984	105360568	4168827	3228040	189395648	6391634	131461560	DEHYDROSPHINGANINE	DEHYDROSPHINGANINE [ C18 H38 N O2, tgt=98.60, overall=98.60 ]			(301.772, 76507.35)(302.29398, 32881.63)(302.29535, 6809.464)(303.29797, 220.26332)(282.27975, 2772935.2)(283.28278, 622934.94)(284.28723, 79883.89)(285.28976, 7341.121)(303.16138, 27171.709)(303.97345, 15599.16)(284.29385, 2897.52)(320.3314, 3449.74)(326.37973, 11200.799)(327.64218, 6893.948)(327.041, 12041.817)(327.6251, 10918.043)(328.2944, 5443.56)(305.91397, 25319.97)(308.78308, 7185.35)(309…	28.6734
COPROPORPHYRIN_I	1	2236769	1100541	1792561	893566	1421290	1	1207059	984558	1562813	1056496	1575982	1	1131677	1869947	1105972	2401643	6865535	1612845	2002321	2050024	2888828	1843752	1135819	1204549	1	1969887	1969887	898048	879939	1016915	1162035	944877	1	1680008	1206943	COPROPORPHYRIN_I	COPROPORPHYRIN_I [ C36H34N4O8, tgt= ]			(652.39545, 50320.62)(653.7488, 24595.566)(654.75714, 23117.475)(635.48126, 4426.3467)(637.86945, 4023.7615)(655.6083, 13619.308)(655.4224, 13230.965)(655.5117, 17730.336)(655.2628, 7490.335)(656.2633, 4931.915)(636.95856, 2575.3958)(638.7543, 2413.55)(639.2524, 1755.13)(669.24084, 18231.23)(670.41, 7584.6704)(673.9081, 2278.0847)(674.2857, 2018.785)(650.7007, 7011.7114)(651.5175, 3015.192)(655.2…	13.0393
CPD-14452	761700	1078445	993099	1151763	1	939615	941014	579608	851937	814367	1084079	1422795	904098	1220853	1141190	1081832	507024	884024	1548055	1912800	1443196	1755955	1011919	1238219	1599133	1276200	1	1	1256819	1154359	1	1471718	1189698	1587611	1131045	1517452	CPD-14452	CPD-14452 [ C11 H10 O4, tgt=78.77, overall=78.77 ]			(190.05145, 339.285)(207.0656, 26945.47)(208.1193, 2926.4248)(209.08057, 193.05)(224.97047, 1737.557)(206.72972, 13684.514)(208.099, 190.83)(231.05045, 15176.022)(232.05478, 366.28085)(213.04068, 305.85925)	10.8337
CPD-14455	1	1	1	761983	612834	297271	1	1	429740	574400	437737	1	1	416801	1	269685	1	1	268181	1	181494	1	1	198473	1	149555	1	1	1	273074	1	516971	568937	402110	336048	1	CPD-14455	CPD-14455 [ C15H16O9, tgt= ]			(343.97675, 18213.64)(344.84457, 27185.863)(325.96786, 1033.3167)(326.83157, 4061.9778)(327.07983, 7192.8203)(342.42468, 777075.44)(342.0889, 1882.17)(359.1151, 4397444.5)(360.11697, 2297316.2)(361.1188, 514496.34)(362.12106, 63996.582)(363.124, 6482.697)(344.1112, 512.32)(367.07816, 5152.974)(368.0832, 1049.896)(345.06168, 9601.007)	20.6571
CPD-14454	1	1	1	761983	612834	297271	1	1	429740	574400	437737	1	1	416801	1	269685	1	1	268181	1	181494	1	1	198473	1	149555	1	1	1	273074	1	516971	568937	402110	336048	1	CPD-14454	CPD-14454 [ C15H16O9, tgt= ]			(343.97675, 18213.64)(344.84457, 27185.863)(325.96786, 1033.3167)(326.83157, 4061.9778)(327.07983, 7192.8203)(342.42468, 777075.44)(342.0889, 1882.17)(359.1151, 4397444.5)(360.11697, 2297316.2)(361.1188, 514496.34)(362.12106, 63996.582)(363.124, 6482.697)(344.1112, 512.32)(367.07816, 5152.974)(368.0832, 1049.896)(345.06168, 9601.007)	20.6571
CPD0-1276	3396757	4609671	8021861	1638007	2143345	2135101	2469773	1819577	559623	5170783	6914817	6274156	2585733	9928920	1	3162270	2523849	242885	844799	2083415	1701505	2207453	2266480	2750525	3192674	3512921	2508549	2508549	1353112	7961057	2655496	1	2525748	3067370	2078461	2798535	CPD0-1276	CPD0-1276 [ C8 H12 N O4, tgt=85.38, overall=85.38 ]			(187.3065, 82680.0)(188.12561, 19627.44)(189.4463, 8706.108)(190.30862, 3547.2668)(170.00885, 15531.951)(170.0717, 3196.34)(188.55312, 12903.968)(171.07936, 10129.861)(208.1207, 765.21)(188.55089, 1876.0854)(190.10869, 2481.942)(212.66249, 48055.03)(213.91103, 5130.059)(194.41571, 3869.7822)	2.46892
CPDQT-419	6393868	4645628	4418938	5435514	3707578	46994300	7624243	4799533	5062271	9906892	6198119	10092452	15997304	9967247	4468040	6052168	5070362	8216946	7981516	6482265	47632052	58817224	37177628	4418935	8705405	8698894	7710969	7710969	7019623	9493568	6409801	13890865	5288851	1	6724003	2927664	CPDQT-419	CPDQT-419 [ C16 H31 N O6 S2, tgt=52.48, overall=52.48 ]			(400.23758, 7258.702)(401.1581, 5469.9146)(384.68048, 993.7186)(384.81314, 1218.7034)(385.1458, 4173.22)(399.69247, 9312.524)(401.76294, 35516.195)(403.83655, 17955.174)(404.1702, 6225.55)(380.9095, 11646.726)(382.1602, 2756.455)(417.04025, 131145.16)(417.55023, 33853.44)(419.5353, 8939.874)(418.2144, 409.85)(398.89655, 41454.48)(401.3808, 47948.246)(401.68292, 22918.244)(402.18066, 105811.66)(42…	14.7776
CPDQT-418	18248786	11586497	12220745	11511845	10262255	15341253	15723954	8856630	12863476	10451372	11196125	13573373	19961092	12339652	11875710	12984028	15548287	15869582	6756996	6990269	6466423	8375880	4575127	4380314	6972772	6575180	9352788	9352788	4528214	7322697	6018095	4507281	6177868	5766901	7358130	2918175	CPDQT-418	CPDQT-418 [ C15 H29 N O6 S2, tgt=75.37, overall=75.37 ]			(385.0427, 578.807)(387.1452, 11912.59)(366.22354, 1629.8771)(366.1384, 869.175)(387.81958, 745.7767)(387.8998, 2979.5225)(388.1434, 3514.02)(367.93817, 1626.0765)(369.01474, 2627.7651)(369.14172, 939.69336)(401.20636, 387821.03)(402.20984, 74855.33)(403.21323, 13480.21)(404.1738, 828.4825)(383.99915, 3678.3567)(408.96432, 4581.6934)(408.63486, 1634.895)(410.1244, 598.19)(389.12305, 1169.5066)(39…	18.4025
CPD0-1274	521021	499065	392158	339443	285620	279419	340776	286319	375373	282659	308809	278935	488948	276669	338184	218890	360516	211328	763370	742072	762587	826197	608052	253661	622437	642524	1	1	1	1	545307	1	520093	613116	682027	320587	CPD0-1274	CPD0-1274 [ C7 H5 O4, tgt=82.03, overall=82.03 ]			(172.52403, 2131.6643)(173.43384, 4141.6743)(174.06061, 9104.199)(155.04697, 54134.28)(156.04984, 1911.4115)	14.6759
CPDQT-411	2211500	1105668	14099909	7206131	10111035	4183511	2394605	942427	1385987	898683	9299574	756856	894700	10463298	14589756	9449322	2078826	6418410	24262544	35231432	30341404	59430080	38631032	8983552	15482699	13679799	43832688	43832688	24109078	14117723	29202056	5679842	11862017	25885836	32550608	7409497	CPDQT-411	CPDQT-411 [ C6 H13 N O S2, tgt=64.33, overall=64.33 ]			(180.21849, 1761.3467)(167.03435, 481.10614)(199.07558, 2317.4688)(200.15807, 3322.7595)(201.15717, 7624.6377)(202.99112, 1721.0331)(203.0698, 204.16)(180.94055, 3000.527)(185.06233, 2470.73)(204.0281, 317.41998)(187.0238, 420.02)	17.8856
CPDQT-412	1895805	1581105	1	4267846	3541649	3054025	1	4726555	4596307	2974463	3363996	5050372	1	5522572	5481864	5433506	1523760	1	10533560	9515841	11821351	13668937	9362331	3591215	8759411	15334869	1	1	8250426	24842156	9661208	2782176	14142516	22324188	10626188	24415100	CPDQT-412	CPDQT-412 [ C7 H15 N O S2, tgt=59.11, overall=59.11 ]			(198.05312, 518.8082)(194.31587, 5600.7427)(195.06639, 651.2614)(179.58464, 17253.89)(181.05095, 6405.847)(213.35168, 5284.6333)(214.15836, 2051.836)(215.21988, 3224.2546)(217.08728, 3882.7773)(197.75702, 3526.364)(196.0794, 862.7)(199.0766, 4408.9)(199.03938, 699.5999)	16.9784
CPDQT-415	1	3998835	2457957	2554179	1571484	1270200	3468503	2622733	4596897	1604319	3181362	3551567	5568605	2085071	3532912	1983257	1	3556663	1985817	1	13076110	2705266	8627887	2830392	4349765	3439557	2789562	2789562	9490691	3020667	3454041	1293067	4169235	2194137	3480755	3724361	CPDQT-415	CPDQT-415 [ C10H21NOS2, tgt= ]			(238.60352, 525.731)(240.1026, 2307.56)(220.69215, 3502.05)(237.88646, 4579.342)(239.64844, 9659.169)(240.82344, 13799.054)(242.1088, 3466.54)(221.52829, 1607.0358)(224.0998, 562.44)(255.3034, 13551.457)(256.30527, 11472.048)(258.4674, 633.10333)(236.18974, 11848.365)(237.4621, 8113.4194)(239.76093, 12511.767)(241.1224, 9913.85)(260.5485, 4476.2144)(261.7605, 7312.4185)(262.61386, 8561.989)(263.1…	10.817
CPDQT-414	18502768	1	11918925	17050796	16079542	3139924	4930839	2527209	11289633	21249576	3231350	3207786	7993724	9796195	2041219	3331907	17453600	2288429	17555212	17436448	17240876	21501072	13720048	10241492	13439312	14671227	21195684	21195684	10856157	8464576	14028079	12003827	11098786	11600523	1	9059850	CPDQT-414	CPDQT-414 [ C9 H19 N O S2, tgt=74.20, overall=74.20 ]			(224.77296, 1291.4313)(225.0817, 1890.45)(227.0839, 3741.28)(205.87837, 498.10196)(222.85817, 4146.891)(224.09853, 1539.7399)(228.0971, 1227.61)(206.32065, 51713.117)(207.3892, 6583.0386)(206.08456, 316.266)(241.23123, 5569.6743)(242.35707, 7184.104)(243.83249, 1900.6315)(244.1239, 295.74)(223.04137, 12755.545)(224.77547, 9179.583)(246.6297, 3296.8916)(247.93332, 1024.8629)(249.07385, 674.05566)(…	7.65356
CPDQT-417	104535456	16043980	107936064	83580032	22113238	17891650	3404442	7721080	94333944	32502086	70261504	84928152	78921472	11683526	58635980	64846620	52310252	69965592	4677585	22069512	3200956	4839233	4271984	4113844	3413428	3061110	3666154	3666154	3127549	2762032	11708819	15741096	3875921	2632920	3882807	3871796	CPDQT-417	CPDQT-417 [ C14 H27 N O6 S2, tgt=51.09, overall=51.09 ]			(370.326, 2245.9429)(372.37906, 1182.705)(374.1265, 13217.93)(375.1224, 49824.64)(353.98846, 1303.99)(356.1176, 857.02)(372.77148, 1835.2562)(372.63477, 702.80005)(355.7797, 5281.541)(356.19345, 10626.266)(357.1229, 7025.1836)(357.62186, 6058.2197)(358.122, 6921.89)(388.8977, 984.23846)(392.66003, 165.60999)(371.28674, 5652.1533)(372.1527, 3329.9246)(373.14813, 3190.4019)(373.9516, 1357.208)(374.…	9.7945
CPDQT-416	51372104	1770440	2202214	2469548	1891562	70510192	80167720	65865668	117718816	1950929	116218256	66139104	2611767	119071896	1975129	1199353	2453849	66255028	7747596	5134267	8421107	5876238	8038497	5468468	3508133	5928721	5948603	5948603	3736213	12817444	8536706	4351558	6309325	8964821	4335256	5356604	CPDQT-416	CPDQT-416 [ C12 H23 N O6 S2, tgt=80.28, overall=80.28 ]			(341.3556, 4375.8203)(342.09607, 936.1)(327.08447, 2543.205)(343.32602, 322829.53)(345.79224, 152096.94)(347.4697, 31511.033)(348.106, 24730.89)(324.0937, 112365.43)(325.097, 19226.227)(326.09277, 7300.2354)(327.09525, 868.76666)(361.24326, 3894.7776)(364.20367, 17792.898)(365.1334, 11157.781)(344.66882, 1196.5734)(367.8821, 12871.514)(369.55505, 2276.6897)	11.5814
CPD-724	7327151	8568772	10305234	6420909	9527461	3307141	1	6377674	6404990	9583837	9425538	8602500	7980614	10119808	6801527	7234020	2385277	7450914	1	3489054	7676111	14141131	10339946	20821660	4404776	14289416	6204573	6204573	1	6515488	1	16160697	11914636	6744471	1	16143568	CPD-724	CPD-724 [ C28 H50 O5, tgt=68.72, overall=68.72 ]			(469.59586, 3675.2607)(450.44083, 8370.142)(451.53925, 9377.36)(452.36066, 219.13501)(468.58145, 3167.8882)(453.62216, 1065.3236)(490.42334, 305.05402)(468.1087, 12151.61)(489.3573, 112446.73)(490.35876, 38513.875)(491.35376, 12581.44)(492.3542, 1317.0239)(493.3506, 169.74)(471.99246, 106574.59)(473.04022, 35441.96)(473.81818, 16909.902)	24.9842
L-ORNITHINE	4533188	3858667	1	4330497	2108126	3945882	956090	2939522	3364845	1529689	2574089	2542959	2682334	1	1013889	3750592	2894685	2912135	1755624	4495197	2518413	2216824	2087803	2969790	2044557	1716788	1438825	1438825	3197874	2971982	1459447	1319607	1704063	1312700	1468447	2277585	L-ORNITHINE	L-ORNITHINE [ C5 H13 N2 O2, tgt=68.27, overall=68.27 ]			(135.3026, 4179.04)(137.10745, 3012.56)(117.09115, 3868.366)(134.10379, 14168.609)(153.60002, 3029.546)(155.1424, 830.13)(159.09438, 43783.32)(160.09627, 9408.283)(161.09645, 10158.062)(142.08583, 9834.006)(143.0862, 8356.16)	13.8715
CPD-723	6234802	5327783	3637390	5135903	5690519	5740557	5134827	2964637	5905010	13862096	6113932	6462416	17588226	33334958	11928604	28485576	12595098	12665657	79089728	7733496	35877296	120897088	6329955	39472948	5460144	15045646	18530178	18530178	28198960	44923812	10509091	16768298	21115716	42795936	5785850	7465492	CPD-723	CPD-723 [ C28 H50 O4, tgt=88.67, overall=88.67 ]			(454.1309, 1000.3558)(435.5978, 6647.382)(435.1651, 2940.6772)(438.3772, 1725.73)(457.39603, 510.6967)(437.12628, 3113.2512)(436.87897, 404.27)(471.02768, 3041.853)(472.7487, 3835.7034)(473.4143, 253.89)(474.4281, 73.48)(452.8963, 16113.774)(453.3977, 8978.1)(454.3997, 1719.65)(474.4261, 28414.004)(475.8847, 9624.044)(478.232, 1720.5085)(456.68793, 110537.21)(457.8128, 37987.207)(459.1945, 11498.…	26.5206
CPD-16015	35196768	30460116	21081716	19717420	14038396	17554306	14996253	15613862	19157760	11191865	10174884	10051954	27656608	11809609	23971646	10207057	18632396	8004172	27054136	27062244	25674480	21414102	18597334	7588767	19174800	13739196	24519626	24519626	3297343	8904462	20525744	3625325	10380514	18573266	19774184	1	CPD-16015	CPD-16015 [ C3 H5 N O2, tgt=87.82, overall=87.82 ]			(106.06762, 375976.38)(107.07034, 14928.886)(109.034874, 890.03925)(109.0751, 686.23)	14.9133
CPD-725	7631352	413078880	23268932	24901866	38122784	41879808	32550690	19614620	146466832	9510226	15749814	6806418	30092208	19274000	25805298	163471216	374352096	30238352	4257922	4907047	248357632	11345121	22464470	229216816	4441112	25352168	171618048	171618048	7461844	6631708	197821904	33966276	153796000	168812928	175157632	106038280	CPD-725	CPD-725 [ C18 H29 O4, tgt=62.31, overall=62.31 ]			(310.0066, 12291.83)(311.30185, 9322.405)(291.47336, 82138.516)(292.1949, 62022.027)(312.38675, 1333.7533)(293.20645, 1249149.5)(293.6407, 272576.16)(294.66434, 40208.38)(295.2696, 4605.5967)(297.2185, 4779.44)(328.24625, 23197.17)(332.2583, 594.36)(312.9175, 5919.243)(311.5718, 2619.5833)(334.6708, 8598.567)(336.2093, 10598.452)(336.60968, 4121.87)(314.1817, 238258.22)(315.47266, 23010.947)	9.1005
CPD0-1336	1	1	1	140211	1	1	1	1	1	95469	157437	1	1	1	1	1	1	1	1	1	1	1	1	1	1	1	1	1	1	1	1	1	1	1	1	1	CPD0-1336	CPD0-1336 [ C3 H3 N2 O2, tgt= ]			(104.028244, 297.535)(117.0545, 621.2)(104.05133, 354.69003)	5.35924
CPD-729	27914578	168034816	23283924	35675792	21325828	39553980	27495946	18558888	143236544	23637556	6628254	33268716	39136880	52495236	23232120	154399104	369834368	24832888	22651052	17330650	249742784	23476436	18832532	225541248	20806260	20430704	168517200	168517200	6675908	7752497	196494656	9184930	151206848	167289536	172881968	101034176	CPD-729	CPD-729 [ C18 H27 O3, tgt=88.46, overall=88.46 ]			(292.02878, 46659.723)(292.9757, 15478.311)(294.2044, 1229.79)(278.2, 2631.685)(292.93207, 1884651.5)(293.26166, 412715.44)(294.20834, 46529.734)(295.21027, 4624.3394)(275.19742, 2451292.2)(276.20038, 356941.38)(277.2019, 43271.746)(278.202, 3758.0972)(279.20566, 73.565)(313.03122, 537.7225)(314.2428, 1323.44)(293.228, 4085.0066)(314.1816, 312907.2)(315.24454, 51125.47)(300.15866, 147169.0)(300.6…	5.53675
CPD-16013	353986	275017	190598	300623	392733	438827	469149	367629	295299	285572	507441	321930	467719	404518	211285	471057	372231	248842	395676	387800	522063	491232	432212	389332	1	474468	419506	419506	236042	449240	399383	541229	625533	537999	616761	435408	CPD-16013	CPD-16013 [ C4 H6 N O2, tgt=87.46, overall=87.46 ]			(103.05245, 2300.645)(127.03824, 53501.11)(128.04156, 2864.0376)(105.01801, 17186.477)	12.1363
L-GLUTAMATE_GAMMA-SEMIALDEHYDE	9326246	9719220	10306659	9518343	8915747	5829209	6868139	1631413	3398297	8632877	2167042	4512982	8315372	7651925	5178769	5623492	11379366	4299833	10559878	1	14232705	5283349	3759403	1	2252466	2127624	2086196	2086196	7960209	3453162	1	1	1	1	1	1	L-GLUTAMATE_GAMMA-SEMIALDEHYDE	L-GLUTAMATE_GAMMA-SEMIALDEHYDE [ C5 H9 N O3, tgt=59.55, overall=59.55 ]			(134.06625, 1009.234)(116.94862, 1861.4225)(117.05563, 285.67667)(135.46541, 11489.318)(136.45145, 13657.584)(137.0772, 1257.09)(114.05556, 1526.3676)(152.69827, 7799.38)(154.1014, 12364.218)(132.1753, 34367.703)(133.08522, 3874.9758)(155.05081, 1427.1376)(140.0468, 1781.4889)	10.1864
CPD-9778	722146	751179	1	691195	625116	107738	1	439443	1	1	1	1	1	776215	1	1	1	1	474516	536330	494451	560733	553154	524177	475326	472843	497221	497221	461219	526442	646314	619207	595408	1	599212	636628	CPD-9778	CPD-9778 [ C5 H4 O5, tgt=83.67, overall=83.67 ]			(144.00484, 5909.7896)(144.99817, 78.4)(126.9991, 99.02)(149.02316, 15305.523)(150.02693, 523.8765)(164.0431, 142.4)(145.03374, 3591.967)(147.03595, 2493.3901)(170.00415, 262.665)	22.4982
CPD-9777	11760458	12604035	9049643	12162398	8494343	4644638	13533802	5946854	12549861	4043874	15436500	5032435	9756552	8072162	10881292	14900858	14325520	11092788	5577781	8021175	9491238	6257307	8962034	7478633	12540576	6882631	8502873	8502873	1	2556839	13580830	97700896	156344176	82207776	102866560	76328312	CPD-9777	CPD-9777 [ C10 H18 N O3, tgt=69.71, overall=69.71 ]			(200.1264, 26722.434)(182.66902, 44150.973)(183.12, 75659.27)(204.14195, 12160.595)(185.10036, 415662.5)(186.10326, 53000.848)(186.1312, 1149.66)(218.1596, 89229.83)(202.92657, 275157.6)(223.29356, 5251.457)(227.1274, 5678.11)(206.39633, 5535.8677)(209.1175, 828.02)	25.0683
CPD-9779	7575221	12089779	7743294	6711008	1	3909186	7104422	4602231	6577620	5834702	6088613	10609903	4437453	30803456	3933054	5646697	64167120	17097292	8064912	15519684	2244992	3460122	3513729	16442286	5616560	10667555	13935880	13935880	16006914	9161038	4601457	14944447	1	11120163	24396384	13370691	CPD-9779	CPD-9779 [ C9 H15 N O3, tgt=87.39, overall=87.39 ]			(187.11049, 7492.3706)(188.10974, 23710.059)(168.6881, 20614.174)(169.09706, 13858.703)(186.51974, 7947.611)(168.10184, 16994.451)(205.77124, 49636.125)(207.83942, 22404.645)(185.12845, 272562.75)(186.13188, 64462.5)(209.89873, 2055.9663)(212.10266, 11854.42)(213.1062, 1358.65)(190.26834, 14342.773)(191.4893, 2369.8638)(192.0932, 416.98)	7.11019
CPD-9774	8871730	33127264	6717815	66046000	62057136	71686752	61590408	1	30742832	1	33630208	1	15350622	59540628	58672616	60521776	59671940	1	6806409	17814156	11502761	10405099	19095108	6083457	17576690	6745540	10925862	10925862	14214725	31229800	11895642	1	35746996	4216212	1	12877705	CPD-9774	CPD-9774 [ C10 H18 N O4, tgt=72.35, overall=72.35 ]			(219.74173, 99822.4)(201.95036, 514683.4)(203.12805, 43018.16)(217.99037, 41650.945)(218.5356, 28589.65)(200.34016, 69825.55)(201.39351, 151019.1)(237.16692, 7611.6313)(220.15488, 251424.78)(221.15666, 83713.14)(240.0159, 57535.668)(241.01111, 8123.1167)(242.11726, 316.96402)(221.7704, 1446.4889)	21.0856
CPD-730	1	1	1	457821952	1	110553936	1	1	1	1	1	1	1	1	1	1	1	1	1	12626686	1	22245840	1	1	1	1	1	1	1	1	1	1	1	1	8153467	1	CPD-730	CPD-730 [ C18H29O3, tgt= ]			(293.81305, 381142.84)(294.81555, 75233.734)(295.20483, 7152.535)(275.1977, 7397561.0)(276.20068, 1154142.8)(277.20303, 142489.05)(278.20474, 8557.24)(295.22656, 9773.305)(280.22006, 5226.8833)(281.2211, 7924.38)(312.24982, 4590.065)(295.24323, 3748.95)(317.80737, 146439.03)(318.20825, 356264.72)(298.18976, 26452.035)	23.2673
[truncated: 3,549 more rows]
