# Supplementary material for: Nutraceutical Profiles of Two Hydroponically Grown Sweet Basil Cultivars as Affected by the Composition of the Nutrient Solution and the Inoculation With Azospirillum brasilense
Source: Front Plant Sci. 2020 Nov 5;11:596000. doi: 10.3389/fpls.2020.596000 (PMC7674207; doi:10.3389/fpls.2020.596000)
Supplement: Supplementary Table 3 — Whole dataset produced from untargeted metabolomic analysis carried out in leaves of sweet basil leaves of cv. Red Rubin in response to different treatments. Plants were grown in control hydroponic solution, in a NO3– or in a SO42– over-fertilized nutrient solution, either non-inoculated or inoculated with A. brasilense. [file Table_3.XLSX]

## Sheet: Dataset Red Rubin
Compound	Sample1_1	Sample2_1	Sample3_1	Sample4_1	Sample5_1	Sample6_1	Sample13_1	Sample14_1	Sample16_1	Sample17_1	Sample18_1	Sample25_1	Sample26_1	Sample27_1	Sample29_1	Sample30_1	Sample37_1	Sample38_1	Sample39_1	Sample40_1	Sample41_1	Sample42_1	Sample49_1	Sample50_1	Sample51_1	Sample52_1	Sample53_1	Sample54_1	Sample62_1	Sample64_1	Sample65_1	Sample66_1	Alignment Value	Annotations	CAS Number	ChEBI ID	CompositeSpectrum	Retention Time
CPD-19721	508184	2288341	455399	316861	907587	372665	483467	391367	465066	502077	208745	1870329	240698	160920	205054	1	624843	463245	236753	511716	433185	381785	318423	221989	285530	538461	520956	192637	364128	369399	1	608254	CPD-19721	CPD-19721 [ C33 H30 Fe N4 O6, tgt=69.98, overall=69.98 ]			(635.8706, 3413.586)(637.16034, 1210.507)(617.1438, 1635.675)(620.15, 1226.06)(621.1588, 501.8)(636.50616, 2226.61)(617.10236, 7063.8853)(618.31036, 2121.5518)(619.5192, 567.4709)(651.35187, 2031.2599)(652.33673, 1012.66364)(634.4085, 2493.2073)(634.17896, 1629.0082)(643.1487, 667.73)	14.9232
CPD-12328	2969825	3426875	1772382	1697694	695117	1718445	3126708	1461472	3274751	1327423	3664683	2573641	1183601	1	1	2782988	9667133	573619	3497869	4993530	7890860	4149456	6438047	5737071	2911339	7241753	3884149	4523268	1	6306168	5982423	2421701	CPD-12328	CPD-12328 [ C9 H11 N O, tgt=66.00, overall=66.00 ]			(151.69205, 2918.6494)(134.08052, 7512.34)(153.48009, 23153.117)(132.0818, 69673.586)(133.08524, 6070.7627)(134.08055, 5511.0005)(169.1238, 6499.4497)(150.83768, 11964.181)(151.11197, 9212.8)(173.24948, 10684.397)(173.74431, 10921.754)(154.7307, 2152.0088)(159.0803, 542.1)	19.1835
AMINO-HYDROXYMETHYL-METHYL-PYR-P	1	379761	415098	413493	1	301900	238165	1	312523	1244173	901911	1	350925	442353	324010	1	345617	394676	777378	245881	1	531699	285727	277634	683321	383454	1	1	936915	279804	582908	710935	AMINO-HYDROXYMETHYL-METHYL-PYR-P	AMINO-HYDROXYMETHYL-METHYL-PYR-P [ C6 H8 N3 O4 P, tgt=67.35, overall=67.35 ]			(219.02689, 327487.9)(220.03032, 21321.967)(199.01157, 148.96143)(218.40976, 1611.7169)(203.09384, 4586.4116)(204.03137, 1914.9401)(235.53287, 4297.764)(236.0594, 982.23)(237.0543, 1141.13)(221.40651, 10205.237)(220.05505, 77.91)(243.01884, 814.1528)(244.52484, 2333.025)(225.83481, 1089.9047)(227.01695, 1342.82)	2.09542
VOMILENINE	15685334	1	16992962	19102066	17105360	1	21185184	18307368	15835555	3610867	3057751	3139659	3307177	13786908	16589786	2725806	24520740	8104612	2651684	19189836	2835250	2071998	4534240	5569635	6729648	6032134	3345001	5073654	5703638	7452085	4369457	9132383	VOMILENINE	VOMILENINE [ C21 H22 N2 O3, tgt=64.64, overall=64.64 ]			(353.72818, 8679.377)(355.1809, 4352.755)(333.027, 230010.3)(334.05066, 45288.047)(335.16354, 14882.069)(337.10437, 16227.825)(337.1669, 7117.15)(353.17566, 10531.267)(355.17966, 3416.4849)(334.16235, 4968.1924)(334.82544, 1312.1266)(337.1668, 1908.24)(370.2426, 19150.258)(371.00555, 16344.578)(371.4904, 23408.27)(351.01483, 9549.655)(351.9286, 3328.574)(353.19394, 13781.556)(354.6953, 10466.72)(…	10.3335
CPD-11826	35395272	14045352	36645688	40031388	37159496	45177976	48022348	22603748	37126600	6867873	11680026	17733204	18420510	13957410	43622480	28547052	1	18709136	25994704	20185328	21711310	10713270	26635200	32608022	28252204	21641288	13303787	27756808	26680206	33264886	24162604	47694292	CPD-11826	CPD-11826 [ C29 H49 O9 S, tgt=76.17, overall=76.17 ]			(576.31464, 5195.9414)(577.3221, 119.97)(555.5504, 9160.056)(556.56104, 3337.84)(559.3048, 714.88)(577.1046, 5356.8345)(580.3248, 2908.565)(558.4796, 5783.8086)(560.198, 7266.0093)(561.2404, 4206.2803)(561.3072, 2493.6333)(562.3163, 5078.21)(593.4129, 1440.7214)(595.26794, 1619.2134)(596.10425, 2279.555)(596.3546, 2347.9)(573.3313, 337165.66)(574.3332, 74642.71)(575.3361, 15828.251)(598.6233, 528…	20.5456
CPD-11827	10158230	4646536	4285705	4808697	16395137	20667780	11842005	8591630	14844136	5989441	1	9177503	3961617	6063249	7829826	7070979	3158890	5919027	8824349	7755533	6547681	4756770	1297529	4387375	2164799	4717042	944481	3498845	4330037	646487	4100106	4917950	CPD-11827	CPD-11827 [ C29 H50 O5, tgt=69.99, overall=69.99 ]			(479.04123, 34239.86)(480.70224, 20046.121)(482.9286, 23545.594)(484.04605, 6834.4165)(463.15497, 11669.079)(464.59738, 8346.378)(465.92807, 2613.4177)(464.3712, 8830.0)(479.84406, 7553.5605)(484.3909, 7114.31)(461.67322, 21036.066)(462.67517, 4758.1997)(465.04123, 2552.6233)(466.87375, 2699.14)(498.53995, 2296.651)(498.90808, 1917.1875)(480.915, 29729.979)(483.09445, 26603.576)(483.90994, 10392.…	28.9727
CPD-19728	1432348	3074744	1681755	2518148	1	1878487	730030	1979026	1	1139904	1928564	1153937	1379661	1	1	3131045	1	1	1	1000311	2936345	1	1	3065934	1	1	1	1	3300670	2280565	3842609	2283517	CPD-19728	CPD-19728 [ C16 H22 N O4, tgt=58.44, overall=58.44 ]			(292.7681, 27557.043)(293.56235, 4896.3047)(274.3941, 3332.4836)(295.27902, 38608.92)(296.16992, 17732.125)(296.1697, 2353.12)(278.38184, 27907.332)(279.32947, 52250.59)(279.49695, 26882.867)(280.1625, 105.12)(310.4897, 5041.737)(311.18927, 2904.12)(293.78406, 8062.0747)(296.1885, 1592.18)(316.34595, 34812.242)(317.35117, 9789.044)(319.1503, 2677.87)(299.26437, 244.65)(301.14346, 15492.62)(302.14…	10.5902
CPD-11828	25109420	21138200	19791440	23357964	29373712	33121776	29730896	27532356	22359574	11378141	1	24726792	25292772	18860846	14829997	16319595	58812296	12362473	17739556	1	8907028	17427960	4218033	14464898	19333202	25778060	16616549	9622232	17590296	1	15678156	7654158	CPD-11828	CPD-11828 [ C29 H49 O8 S, tgt=91.79, overall=91.79 ]			(558.36206, 393589.16)(559.4206, 109334.71)(560.31793, 40326.02)(561.99, 5845.496)(540.5024, 573038.56)(541.52747, 170413.53)(542.52856, 40267.344)(543.30475, 8130.2383)(562.5775, 2650.3625)(542.45734, 10114.125)(543.61884, 5704.8154)(544.7089, 15143.809)(545.51996, 9397.943)(546.3228, 11286.361)(575.7059, 4714.315)(577.74945, 5120.15)(578.85095, 5411.5703)(559.4464, 6466.9336)(562.5924, 7537.199…	19.0132
L-DIHYDROXY-PHENYLALANINE	2313444	911944	2545415	2117416	2743843	2257979	2399441	2175695	783837	557115	3190769	933864	2485772	4026303	3689129	2084783	1	2330744	5210187	664581	2565204	989314	4393742	4229688	4412939	892090	1271097	1504550	4680982	1320250	3332315	2468847	L-DIHYDROXY-PHENYLALANINE	L-DIHYDROXY-PHENYLALANINE [ C9 H11 N O4, tgt=79.10, overall=79.10 ]			(199.71841, 1275.8829)(200.32675, 2664.0652)(183.8017, 13107.838)(184.0726, 2695.9)(198.49138, 9407.403)(199.32997, 3631.071)(200.07486, 3792.295)(180.76802, 672.74603)(215.68816, 37565.863)(216.47453, 6617.2163)(217.10457, 843.845)(198.56256, 42366.99)(200.38484, 659.5943)(221.0597, 48451.16)(204.38988, 373.97)	8.3505
CPDQT-326	9412810	8843693	10728844	6590428	10810910	12463377	19648896	1715184	22584872	5066189	16268300	1	13603775	14817202	15830865	37187940	2385895	15766549	19135616	12226886	12100526	15566999	1375947	1379064	2367712	26438044	11262909	1	1	1530339	4886106	1	CPDQT-326	CPDQT-326 [ C29 H50 O6, tgt=77.94, overall=77.94 ]			(496.24014, 33612.566)(499.02213, 16642.62)(498.99988, 10980.316)(498.8717, 10436.085)(499.878, 14575.15)(476.54037, 22297.062)(478.85828, 33479.074)(480.61905, 56062.33)(481.70486, 19102.686)(482.37006, 5068.885)(498.71283, 13135.528)(500.71802, 7494.16)(501.39062, 11980.545)(477.64944, 72910.48)(478.65237, 22455.646)(480.24228, 16952.06)(482.7098, 16647.363)(514.20087, 10882.853)(514.6866, 4930…	27.6307
INDOL-YLACETYL-MYO-INOSITOL-ARABINOSIDE	4543063	3297867	820377	758285	4625623	689625	814274	777637	5494645	2445643	1	1	927022	1	864639	628520	1	642075	4643951	7219999	3763666	3547484	1363443	5953969	752957	5615488	5648898	4830920	4393508	6376827	5479090	8325650	INDOL-YLACETYL-MYO-INOSITOL-ARABINOSIDE	INDOL-YLACETYL-MYO-INOSITOL-ARABINOSIDE [ C21 H27 N O11, tgt=86.04, overall=86.04 ]			(474.33658, 22928.805)(474.16827, 222.545)(475.1687, 1928.96)(451.9294, 2166.15)(455.15372, 2806.1914)(456.16336, 1116.16)(457.16785, 111.770004)(471.97852, 30437.217)(472.0454, 8712.463)(472.16467, 1172.1437)(473.17322, 163.25)(453.87408, 30629.506)(456.76913, 15281.933)(458.17184, 767.65576)(488.41763, 36317.906)(489.65836, 12868.38)(490.56006, 7482.3096)(491.4236, 5417.8555)(492.54175, 14046.7…	13.1255
CPD-19720	686180	2068384	788261	619561	2070180	1934364	1556863	1976474	2191113	360493	539010	2526662	1779508	568916	1708798	1723742	641957	1	358063	1	769865	673076	488350	603518	653372	454583	718243	433131	1	213969	1	1	CPD-19720	CPD-19720 [ C34 H30 Fe N4 O5, tgt=55.46, overall=55.46 ]			(631.7426, 3396.831)(632.16534, 2474.858)(612.4432, 1871.5115)(615.82196, 1615.8365)(615.1624, 555.78)(631.35175, 7189.712)(632.16595, 3276.0977)(611.53406, 7654.229)(612.53815, 2592.1438)(615.16113, 375.03)(647.8774, 5109.177)(649.80566, 1353.7432)(651.59314, 581.252)(630.5442, 5415.786)(632.3553, 2015.0859)(634.192, 501.89)(634.138, 2661.9294)(634.6426, 727.8413)(635.1363, 72.32)	12.7501
CPD-7420	27396392	40987636	6988084	2061651	25569104	42420416	198048176	241607136	44121896	269775584	179330880	251407584	73288496	9672977	293007328	86404128	139724000	1	11478583	199336784	732460	388057088	184596992	180585360	27715738	2773694	1770748	192594432	149559936	147343312	121179296	1	CPD-7420	CPD-7420 [ C40 H58 O, tgt=65.17, overall=65.17 ]			(557.8655, 7847.669)(558.9892, 5828.7295)(539.5795, 21890.47)(540.8225, 12923.568)(541.7266, 3687.7034)(542.45374, 762.395)(557.4667, 9772.721)(560.473, 7493.1323)(540.1174, 19842.479)(573.085, 530468.4)(574.24084, 241017.73)(574.49133, 5630.4116)(575.49243, 862.2)(555.4708, 191.33)(556.4779, 90.05)(579.8555, 24476.832)(580.9475, 17164.701)(580.9907, 9952.353)(581.10406, 4163.6597)(559.889, 6453.…	27.8058
CPD-13471	8997748	7921468	31857128	6783950	1	6743624	8316952	6060180	2478544	20510068	11344548	3660489	3731378	3236060	31656598	16424644	14357063	8466709	17887196	4445183	1	5218948	4309532	1	4640996	2119932	1	2685384	5268348	6323071	1	7791423	CPD-13471	CPD-13471 [ C16 H32 O6, tgt=52.17, overall=52.17 ]			(323.80145, 1581.5514)(324.65665, 3481.7014)(302.2077, 481953.72)(303.2115, 85093.72)(323.23416, 3638.2852)(306.02707, 9904.732)(308.2315, 3682.005)(340.25916, 6541.609)(341.35257, 4013.276)(323.25217, 902.2175)(325.2537, 803.9)(346.5817, 41174.66)(348.21875, 43552.168)(327.07767, 11233.22)(328.70547, 23754.475)	18.4204
L-GAMMA-GLUTAMYLCYSTEINE	2428911	1132416	2016362	1642641	2056349	1	2184446	2576492	2464716	1	1345194	1	2047923	1	1	2344410	1576319	1	1	2599063	3003928	2834062	1	1	3018970	1	2125495	2233933	1581994	4448540	2540881	4073095	L-GAMMA-GLUTAMYLCYSTEINE	L-GAMMA-GLUTAMYLCYSTEINE [ C8 H13 N2 O5 S, tgt=70.58, overall=70.58 ]			(250.35918, 3052.5332)(251.06607, 418.898)(232.05418, 4883.0986)(233.05588, 615.08923)(267.23364, 2171.4077)(268.59204, 450.80246)(249.07758, 2062.7866)(250.07574, 570.57)(272.04266, 2523.4346)(273.0386, 124.97)	15.4324
CPD-7424	219849936	1	268788288	208118688	1	415459744	1	1	272954912	1	170305056	132103896	388386304	1	1	1	1	1	1	1	667791740	1	715156800	606612740	682901380	340726656	410843648	521143136	340757984	1	1	501971712	CPD-7424	CPD-7424 [ C40H56O4, tgt= ]			(600.4162, 139517.3)(582.4625, 46103.92)(584.4182, 184594.72)(585.4241, 49863.74)(587.4265, 2780.57)(588.418, 1620.77)(601.42535, 1181707.5)(602.4288, 505911.0)(603.43195, 113445.0)(604.43506, 20950.086)(605.4291, 2278.4475)(583.41504, 1425821.8)(584.4185, 609349.3)(585.4242, 167072.83)(586.42944, 36478.15)(587.4342, 5094.606)(621.2319, 8029.5635)(622.30084, 9181.711)(621.9684, 9066.02)(622.4645,…	27.2072
CPD-6963	1824426	1585919	1	1703265	1	2100487	1	2166948	2438057	1871156	1	1527235	2629963	2146179	2932822	4265280	1	4283082	4848663	6040941	1	3784006	3781431	3035168	4120792	4985800	2994687	2079098	1	1398796	2662518	1	CPD-6963	CPD-6963 [ C14H14O2, tgt= ]			(215.10321, 45605.523)(216.43922, 7829.8228)(217.10571, 5097.944)(198.93025, 67978.95)(201.1046, 221092.56)(216.32016, 36472.176)(217.04343, 9195.788)(218.10999, 5548.985)(199.6776, 37269.93)(198.0901, 733.84)(232.13544, 34800.168)(233.13615, 357.69833)(234.13127, 216.8)(214.12437, 34786.22)(215.1212, 25830.81)(237.93799, 3506.903)(240.09496, 226.18666)(219.76439, 6524.4443)(223.08882, 1489.7968)…	11.8673
ACENAPHTHENEQUINONE	1682781	1931166	2216753	2394965	1303650	2186238	1235354	1131733	1391959	140540	170426	214512	1	1	1415570	678546	1	227036	120248	1	1373811	827815	2046778	1508099	588932	405583	307036	955038	1558671	1483456	795948	1157204	ACENAPHTHENEQUINONE	ACENAPHTHENEQUINONE [ C12 H6 O2, tgt=60.92, overall=60.92 ]			(185.04524, 7318.7397)(167.034, 6044.96)(168.0373, 225.77)(188.05719, 12550.393)(170.04665, 15297.199)(202.3937, 5301.7427)(204.83542, 4069.1902)(205.084, 62.9)(184.99512, 95858.55)(186.07068, 21074.766)(186.82501, 8142.262)(187.0756, 9445.35)(209.80026, 1409.7853)	7.10025
CPD-12331	9930232	1	1	18470620	1	1	1	1	1	11108857	1	1	1	1	1	1	1	1	1	33186996	1	1	1	1	1	1	1	1	1	1	1	1	CPD-12331	CPD-12331 [ C20H26O4, tgt= ]			(312.1713, 23069.178)(334.86697, 7775.984)(313.4307, 268335.9)(314.43454, 58966.86)(317.1889, 7754.27)(348.21655, 26928.816)(332.4664, 46221.67)(333.21915, 173012.27)(335.2197, 73189.24)(355.4287, 14102.016)(355.1768, 12781.98)(356.1777, 53223.71)(335.8304, 3587.0)(340.1778, 50190.66)	14.8363
CPD-19719	10380871	26451116	32712740	29604904	28856064	28404504	23638954	35320024	31302654	23991798	1	1	34626676	17574702	24503232	14866285	1	21794052	5410235	8136342	8615066	19656016	21294896	20885488	18612696	28712454	8516996	4873446	12845980	8926492	3432526	2163331	CPD-19719	CPD-19719 [ C33 H29 Fe N4 O5, tgt=62.65, overall=62.65 ]			(616.17706, 1392285.1)(617.1801, 531330.8)(618.1824, 114633.22)(619.1847, 17697.752)(620.1869, 2326.4958)	23.8562
CPD-12332	51103504	14509090	25266020	42369984	1	36844228	53036172	53965600	16959468	21190614	24174284	50485824	64995460	38869640	11196410	13838538	22636420	8629651	48099664	15739613	59797988	22295752	12254622	1	70169760	11006184	10031759	13242622	8656974	1	8943232	11530169	CPD-12332	CPD-12332 [ C20 H26 O5, tgt=71.41, overall=71.41 ]			(347.06238, 3745.1345)(349.68817, 16320.355)(350.1867, 31307.91)(328.3467, 216887.48)(329.1665, 167940.66)(330.16916, 15318.525)(350.9988, 21000.598)(352.2026, 256.15)(330.82205, 87853.016)(331.3638, 18128.992)(332.3657, 3150.0251)(333.1856, 388.1411)(366.5541, 9490.261)(367.221, 7264.1865)(369.2295, 25481.8)(347.6074, 34655.562)(348.79758, 20272.94)(350.3133, 18363.807)(350.96576, 5220.4946)(369…	11.7506
CPD-13475	9323495	4587223	5003308	10782565	4335331	7585968	7753167	3260903	2506882	2209433	1832351	4836956	2451730	2613784	3547822	1097129	2934454	2062234	1026302	6466103	2250775	3506695	9031944	4864160	3767170	3092113	6429501	7232094	6024880	3056148	3117232	4047815	CPD-13475	CPD-13475 [ C15 H24, tgt=98.14, overall=98.14 ]			(205.19533, 186569.53)(206.19844, 32968.17)(207.20204, 2186.9683)(222.22198, 1378.9202)(227.17587, 17514.283)(228.1703, 4281.22)	26.6488
CPD-12333	51103504	1	1	42369984	1	36844228	53036172	53965600	1	1	1	1	1	1	1	1	1	1	1	1	59797988	1	1	1	70169760	1	1	1	8656974	1	8943232	11530169	CPD-12333	CPD-12333 [ C20 H26 O5, tgt=71.41, overall=71.41 ]			(346.17746, 1072.3234)(328.16473, 7354.3613)(350.19888, 40577.633)(352.2026, 256.15)(330.17642, 95588.336)(331.18192, 15457.464)(332.18552, 1292.6866)(333.1848, 431.4)(366.5956, 14520.906)(366.46704, 1154.665)(369.2295, 25481.8)(348.9262, 58633.47)(349.92917, 26150.674)(350.8807, 7347.6235)(351.21503, 4873.155)(369.17163, 4560.6636)(351.85886, 11240.531)(354.16846, 12017.405)(355.16376, 16094.79)	20.2705
17-O-DEACETYLVINDOLINE	4918786	7330712	7373879	43327512	6702241	26835416	6624063	43085752	26947178	15410732	10348303	19579680	26596822	7650250	27220216	3721536	35787408	10979465	5499041	22349738	29606544	19972182	21842020	24598270	19629336	15076066	21414168	22994168	23193912	6696798	1	6146567	17-O-DEACETYLVINDOLINE	17-O-DEACETYLVINDOLINE [ C23 H31 N2 O5, tgt=89.21, overall=89.21 ]			(419.05106, 46632.03)(417.23285, 32645.352)(418.2302, 8760.665)(419.23688, 279.57)(399.38513, 40965.426)(400.49286, 11177.993)(400.61996, 9116.964)(401.2214, 3283.1165)(402.23077, 36178.04)(417.42535, 161897.05)(417.63437, 66190.76)(418.56558, 17374.844)(419.2379, 450.18665)(398.77774, 79750.336)(400.34457, 28785.508)(401.5255, 28737.176)(403.2322, 21966.664)(433.79492, 940.67316)(434.2619, 722.6…	9.19759
CPD-11839	2713838	2936532	3063836	1903263	17932964	8637139	3474722	5738455	9055334	18245898	15300393	10098993	17469176	5668671	5239775	7875318	1	1	1993269	3566274	7545269	823552	1800104	2118507	1769554	6301509	1	2025799	1648227	1	2178502	4110974	CPD-11839	CPD-11839 [ C28 H47 O6 S, tgt=58.84, overall=58.84 ]			(513.1097, 5970.822)(513.7118, 3030.228)(514.8168, 1282.365)(515.8149, 1467.03)(517.3108, 1710.24)(495.17465, 21318.057)(496.16812, 12474.165)(496.99445, 3806.2478)(498.13937, 4434.906)(498.308, 6041.6934)(516.2034, 7246.91)(516.823, 5987.523)(517.8613, 90597.79)(518.3228, 10928.793)(496.70956, 11997.84)(497.91513, 8649.242)(500.3152, 5451.15)(531.84454, 3830.845)(533.7189, 1705.2875)(534.0126, 3…	21.7697
CPD-7411	6270961	3071117	11379260	12740271	1	15162656	4457433	10382781	1	1679597	2117463	7931553	10291571	1989160	6289545	6240250	1357211	9639334	728556	7565696	4527390	6773260	4236724	8332830	7893846	2504435	1	450205	3010981	1	1283862	1	CPD-7411	CPD-7411 [ C18 H14 O7, tgt=84.54, overall=84.54 ]			(327.0719, 1600.47)(343.08154, 248994.58)(344.08493, 48573.242)(345.0801, 972.72)(327.5805, 591.675)(363.1174, 288.98)(346.85278, 16241.412)(347.11273, 48361.133)(365.06384, 11024.798)(366.06696, 3384.1792)(367.0722, 189.42)	18.7782
CPD-6971	36990184	30792944	39884480	44615704	45908788	44327156	52298116	50038536	36555248	19254776	1	28215450	31960676	27435516	49631696	38264280	1	17256188	29714690	43039784	24895148	21266060	31160932	12401155	27153358	23127372	23876868	11401279	17251708	24527320	21391716	30662448	CPD-6971	CPD-6971 [ C20 H25 O4, tgt=88.24, overall=88.24 ]			(330.1104, 305161.16)(331.18115, 49623.34)(332.1836, 13136.703)(334.1839, 75.23)(312.0655, 73441.97)(313.01437, 24393.273)(334.94922, 1453.21)(335.1999, 3014.79)(314.18198, 105342.52)(316.1157, 14946.005)(317.18787, 8150.7925)(348.13425, 2001.451)(348.96173, 389.695)(350.2166, 63.46)(331.10168, 6581.9966)(334.2079, 56.84)(352.89957, 12772.653)(353.92786, 14573.741)(356.1739, 67227.34)(335.05603, …	4.33969
CPD-7415	26089248	29105868	41831728	15092151	619176450	1	1	1	273813792	1	879469760	1	1	1	1	1	1	1	1	1	152395664	1	1	1	1	1	1	1	100267584	1	1	1	CPD-7415	CPD-7415 [ C40H56O, tgt= ]			(553.8631, 941110.0)(553.4329, 290121.38)(554.43665, 56668.6)(536.67505, 62180.348)(535.41675, 31317.857)(536.41406, 6317.46)(557.44995, 3892.7168)(558.4553, 2206.6)(539.2747, 18578.4)(540.27545, 9199.821)(540.78265, 8716.671)(540.4451, 8277.0)(571.47205, 1543391.8)(572.4757, 630860.3)(573.4817, 466208.12)(574.4859, 83556.34)(553.8602, 76144.66)(554.46185, 39650.562)(555.4641, 9681.71)(575.649, 1…	28.6001
CPDQT-343	5269639	2301423	6441435	2660188	2353278	2483207	11343696	4424320	4225764	4375398	1	4954453	1	5443363	29589402	3808852	1	15962593	29124536	19660134	27850880	9555254	1	12679133	8303252	1	11480812	1	18710160	10430624	27949300	27544392	CPDQT-343	CPDQT-343 [ C7 H15 N O S, tgt=62.82, overall=62.82 ]			(165.35927, 5765.7783)(166.08699, 11085.692)(144.87968, 98817.41)(147.07578, 5320.9224)(147.075, 7189.22)(162.89194, 4254.3364)(165.59381, 2985.08)(145.88008, 13029.959)(148.08316, 503.50253)(181.76775, 9449.367)(182.92036, 28939.078)(162.03539, 42951.945)(164.60793, 1805.935)(185.76727, 50246.773)(186.894, 10563.442)(168.68723, 9748.599)(170.39932, 3330.5735)(171.0641, 10877.81)	14.9008
CPD-6972	4405918	4493315	590404	375641	191502	3259314	1814400	1438711	1020935	203702	191179	1335461	862931	742805	1018709	702787	1086838	1	421640	512840	1	1	1	1	1	1	1	1	1	1	1	1	CPD-6972	CPD-6972 [ C32 H39 N7 O20 P3 S, tgt=29.18, overall=29.18 ]			(992.1262, 121.23)(953.1087, 3661.2175)(954.1116, 3040.7932)(955.1282, 112.13)(956.1162, 132.19)(969.1235, 716.14)(970.1341, 261.03)(971.134, 163.76)(984.1436, 1469.29)(985.1461, 501.14)(969.63153, 140.32)(972.1425, 144.33)(974.1294, 296.66)(971.90314, 2906.148)(973.1046, 1484.7151)(966.14557, 1974.2035)	29.07
CPDQT-341	1	1452642	3424246	5694385	1673510	3356062	1327971	8987361	10673885	753205	10340278	8281111	7903826	6728033	2058232	1611853	9340572	8856519	9604729	10488196	1	3376703	5590816	5698559	5860534	5959885	3427678	2750753	5749971	6802983	2430798	2034953	CPDQT-341	CPDQT-341 [ C6 H13 N O S, tgt=61.07, overall=61.07 ]			(149.7152, 92426.2)(148.07266, 9556.25)(130.68909, 67348.1)(134.05984, 1191.015)(149.2829, 16189.082)(150.93468, 7486.7075)(151.5793, 19420.14)(132.06326, 65887.695)(133.12823, 7123.843)(134.06662, 363.24084)(167.9749, 15329.253)(148.06053, 17572.906)(151.0953, 11436.07)(170.9562, 10538.134)(171.74985, 2624.215)(172.4593, 1178.816)(153.60947, 3132.228)(155.0499, 122.314995)	6.59259
CPD-6975	2661258	1	2858340	6362355	3302567	2739417	4057696	3684376	4299948	3692101	5032929	3726817	3343427	4583303	1074587	1440758	1	5060144	8010814	4466973	7823299	1402114	5026968	1912260	2212825	3207397	992007	1	3655152	1	2588132	1	CPD-6975	CPD-6975 [ C19 H21 O5, tgt=75.99, overall=75.99 ]			(330.307, 4829.494)(332.54694, 3644.864)(313.45532, 11036.832)(312.73444, 6689.4946)(313.1283, 7148.08)(314.1229, 261.14)(332.81845, 204998.5)(334.56104, 17954.348)(332.1596, 3898.78)(312.5833, 8092.224)(314.29337, 2325.14)(348.7544, 3726.9578)(349.37286, 1689.596)(351.1864, 597.1)(329.9278, 49970.67)(330.36755, 7348.9854)(355.19244, 2691.789)(356.3404, 2195.832)(334.34753, 6188.15)(335.1122, 181…	12.5113
CPD-6974	28977618	1	53611040	29229650	15418064	21933356	38306196	36655744	23357824	11620248	23757848	22333576	60532388	18769196	26129168	25162804	34383280	1	22562336	65966984	44968820	40943596	63415136	59024436	105496160	24085072	37317048	61623056	49788300	112068384	41005132	103675168	CPD-6974	CPD-6974 [ C20 H25 O5, tgt=98.24, overall=98.24 ]			(327.16, 2199879.5)(328.16336, 476959.34)(329.1683, 70767.74)(330.16968, 9578.572)(366.38742, 4951.38)(367.5504, 1058.5767)(347.9541, 48552.332)(348.90778, 51091.945)(350.14468, 67528.266)(351.15073, 13595.9)(352.15662, 1455.4889)	24.0856
CPD-7418	7423941	7716314	1	7058667	14377531	6784911	6372262	3871555	1	3891710	3363139	5170276	5486256	4068437	3399596	5598613	52160084	1	3488307	1	17386116	75833216	2978051	5563059	3970396	12931536	5073261	3237862	2466399	3076186	118679408	3653718	CPD-7418	CPD-7418 [ C9 H7 O3, tgt=99.57, overall=99.57 ]			(163.0392, 570089.9)(164.04251, 56515.31)(165.04771, 3481.444)(145.02803, 6753.0605)(146.0316, 1107.3966)(146.0361, 925.25)(183.07874, 13938.284)(184.08, 210.2)(166.44173, 7418.088)(167.57271, 6057.1484)(168.0755, 1559.05)(189.03694, 20578.361)(190.03987, 8164.2397)(191.041, 1400.69)(171.02866, 292.6)	20.3991
CPD-7417	39193916	44414260	54722224	56210768	55282472	57311860	56521984	52500968	51632892	15203217	13161952	26686744	33803176	25038470	42519984	27835924	1	11289031	41504580	37016880	14308118	7504757	9269784	11442369	10606028	5557108	9777134	7917931	10778059	9910630	7415897	14518820	CPD-7417	CPD-7417 [ C15 H17 O8, tgt=76.09, overall=76.09 ]			(328.18127, 1404.101)(328.73767, 872.7437)(329.10385, 994.25665)(307.08127, 477607.4)(308.08475, 53254.332)(309.08084, 49861.766)(310.0842, 5616.5)(311.08478, 616.196)(327.41943, 393.58682)(313.106, 203.92668)(344.52875, 622.24896)(326.37903, 2158.074)(326.1072, 333.5)(327.1024, 242.1)(349.18387, 5478.5703)(351.42334, 1231.4789)(332.14392, 14855.838)(333.17624, 26015.824)(334.11713, 15932.043)(33…	2.73644
CPD-6979	2887678	2291966	3644085	3668733	2656331	2928730	1	2202801	1	1	1	8942557	11937599	2293253	7227121	7085011	1	11212801	1	8556940	5318228	8042066	5122876	9697402	9411635	3162417	2036350	1	3691400	1	1613724	1	CPD-6979	CPD-6979 [ C18H15O7, tgt= ]			(343.0815, 202099.4)(344.08493, 39373.96)(327.07822, 34016.098)(328.08182, 7638.5938)(327.08514, 3700.88)(328.0818, 9119.73)(361.1175, 351.87)(347.113, 15017.392)(348.1165, 2504.3918)(366.40427, 2269.9011)(349.06058, 625.67)	20.4035
CPD-7416	12211222	26546004	11680752	15680637	895063810	1	1	699265660	1	1	525054624	463574656	806070530	579451260	962281470	837567360	435290944	533846528	549020740	1342687620	796696700	838093120	1	1	1	55400112	1	1	1	1	1	1	CPD-7416	CPD-7416 [ C40H56O2, tgt= ]			(568.4247, 139704.38)(569.4311, 26670.33)(550.41125, 24873.053)(569.4341, 270577.3)(570.44366, 139048.8)(571.4383, 16778.445)(552.639, 3743651.0)(552.42865, 2060460.8)(553.432, 442312.88)(554.43524, 67279.375)(555.43176, 15149.865)(587.5809, 32362.453)(588.5514, 14928.237)(590.4824, 10906.675)(571.1298, 133086.3)(571.9661, 48613.492)(594.6385, 14031.02)(595.7169, 25822.74)(597.0985, 38906.426)(59…	28.3128
CPD-6978	2887678	2291966	3644085	3668733	2656331	2928730	1	2202801	1	1	1	8942557	11937599	2293253	7227121	7085011	1	11212801	7404056	8556940	5318228	8042066	5122876	9697402	9411635	3162417	2036350	9476751	3691400	5513244	1613724	1	CPD-6978	CPD-6978 [ C18H15O7, tgt= ]			(343.0815, 199290.75)(344.08493, 38957.09)(327.0783, 30241.695)(328.08182, 7638.5938)(327.0223, 3526.7087)(328.0818, 9119.73)(361.11816, 141254.19)(362.1211, 34636.5)(363.1246, 3107.32)(346.6675, 35769.7)(347.67096, 5871.5527)(345.10855, 6741.5254)(346.1113, 160.11)(366.40427, 2269.9011)(349.06058, 625.67)	20.1437
4-AMINO-4-DEOXYCHORISMATE	4018246	3685506	4088102	3324402	4123941	3954974	1	1	4305263	4470789	4289895	1	3753660	3490277	1575830	1	1	1	1	1	6036888	6596879	5652038	8112283	7945488	632312	1657392	7876594	8209496	8113928	574320	7944716	4-AMINO-4-DEOXYCHORISMATE	4-AMINO-4-DEOXYCHORISMATE [ C10H10NO5, tgt= ]			(227.06198, 364.948)(206.54823, 5268.3447)(207.048, 1170.7)(225.94072, 48039.836)(226.06975, 26476.545)(227.0753, 2312.225)(207.45296, 4769.344)(209.38701, 728.1533)(242.56711, 8337.614)(243.3022, 1219.5626)(224.44273, 44253.54)(225.78917, 2739.7751)(247.54535, 3944.8823)(248.04825, 134.78)(229.33487, 4097.1123)	3.60253
CPD-11846	5057001	1729313	2018115	2135661	3857258	4085513	4117157	3764220	1378642	1	1331839	1328147	3212358	2166301	3850912	2779350	1	1108018	1289669	4479264	1550979	2118414	3088939	2167540	2275826	1659365	3236551	2875193	3264389	2296025	3070716	4688536	CPD-11846	CPD-11846 [ C12 H11 N O5, tgt=80.56, overall=80.56 ]			(249.06134, 37541.742)(250.06506, 3633.9917)(251.06621, 355.05582)(231.05043, 63098.41)(232.05426, 6279.9736)(233.05594, 647.58795)(255.08484, 8467.162)(270.84088, 7912.909)(270.96432, 3500.927)(252.19601, 5493.388)(253.01512, 4368.8433)(253.0986, 1689.84)(274.17932, 1548.513)(257.04745, 458.115)	16.7873
CPD-11847	2381248	2787262	2921326	2632416	1730422	1671417	1740364	1485135	1924859	1491290	1722220	2079028	1987800	1497126	1393269	1324890	1	2467492	1284960	1	2530446	3162124	5361684	4828523	2480864	6167377	5935978	4123617	3705842	4683851	4289021	5026451	CPD-11847	CPD-11847 [ C12 H11 N O6, tgt=83.55, overall=83.55 ]			(249.06166, 6149.299)(253.07071, 294.255)(285.09418, 222.952)(266.0843, 13629.841)(267.08752, 1662.0125)(268.0884, 146.75)(272.04242, 2974.5583)(274.87082, 8652.968)	12.916
CPD-10797	7423941	7716314	1	7058667	1	6784911	1	1	1	3891710	1	1	1	1	1	1	1	1	1	1	17386116	1	1	1	1	12931536	1	1	2466399	3076186	1	3653718	CPD-10797	CPD-10797 [ C9H7O3, tgt= ]			(163.03917, 280421.5)(164.04253, 27979.973)(165.04611, 2182.604)(145.02786, 1082.21)(183.0788, 17680.816)(184.08, 210.2)(165.06955, 4354.823)(167.07143, 8862.083)(168.0755, 1559.05)	25.956
CPD-11845	24041556	33132632	67212872	30391348	81503816	30295976	81574384	79606144	35433560	16407618	17026568	610979	11621405	13867408	56405996	20665300	18139816	6589234	32771176	64924692	842017	29380606	30893456	2227549	1228553	19217856	44217512	29905488	1580855	35283184	902181	29671900	CPD-11845	CPD-11845 [ C13 H13 N O7, tgt=89.92, overall=89.92 ]			(296.00528, 25264.668)(296.92877, 10818.209)(297.93115, 1235.2272)(299.4207, 2201.4968)(279.06897, 49114.94)(280.2271, 4676.4644)(281.07297, 395.28204)(314.35803, 1124.1611)(315.60495, 4285.08)(299.51788, 894.43005)(300.1077, 217.48)(318.99405, 3784.207)(322.76566, 11279.274)(323.074, 13906.24)(302.27747, 805.4667)(305.0649, 6248.46)	5.91309
CPD-12348	2988713	3338607	2388676	3851844	1	1	5911099	8118157	11895111	2950051	13145087	4768613	4856621	1	974741	5110233	6124305	1	5408689	3082810	2911283	2035865	4058355	7006172	2035152	4820141	3845339	3909007	1253918	1	5552055	4731434	CPD-12348	CPD-12348 [ C23 H34 O3, tgt=67.04, overall=67.04 ]			(358.452, 51361.63)(359.25833, 29863.69)(360.2618, 1579.4233)(340.90845, 11230.326)(343.7513, 59752.125)(345.2567, 42725.97)(362.1417, 20767.48)(361.77002, 9287.4)(364.2675, 12299.42)(344.4698, 82189.33)(344.53864, 31718.357)(377.88864, 21163.533)(379.35806, 13190.765)(379.6261, 2443.9268)(380.3001, 1460.74)(360.98193, 9648.888)(360.61108, 11329.43)(361.78833, 3288.8901)(362.29, 1237.05)(382.3991…	26.8716
BETA-D-XYLOSE	2494747	3396734	3353129	4200445	3747681	3427981	1	1	1	315455	2146866	2507197	1	4738577	2932435	4224942	1	2850272	2718741	2456310	2265971	1	1	1924532	1	1	2315888	1590971	3608268	4833916	1	1	BETA-D-XYLOSE	BETA-D-XYLOSE [ C5H10O5, tgt= ]			(152.10507, 29952.215)(153.06071, 2731.815)(133.92029, 470.70374)(151.06093, 14977.264)(152.0658, 6488.58)(133.9086, 3104.8489)(134.0466, 76.27)(171.42917, 5105.4175)(172.31947, 6587.761)(150.07574, 22059.215)(176.25087, 175.92)(159.8434, 495.55093)	2.23047
CPDQT-300	721050	849862	949326	904850	614592	747031	705030	942466	636236	405791	431549	569107	899509	470837	666521	770825	763933	1	2799928	2521617	1165848	1799637	3383637	2891170	1355201	3790478	3595454	2479989	2095898	3122920	2736444	3082534	CPDQT-300	CPDQT-300 [ C16 H30 N O9 S3, tgt=55.80, overall=55.80 ]			(477.58627, 25245.916)(477.3605, 7357.6714)(478.11493, 1134.906)(464.09094, 2682.0493)(465.1006, 2226.05)(462.40518, 9484.927)(462.25186, 2796.3635)(461.1115, 385.25)(498.80838, 1825.6636)(477.58252, 1435.6989)(479.13266, 50010.457)(500.71484, 3159.1833)(501.31586, 9007.78)(502.10483, 1737.9886)(482.53305, 4200.6777)(482.94937, 509.76144)	15.4764
CPD-12350	80364728	11731540	1	52522012	1	46545416	94055504	80956192	53183808	1	15419012	1	1	1	1	1	1	1	1	1	30471988	28688868	35813696	39945408	14758438	15458100	30525852	52195152	32861528	1	41921000	1	CPD-12350	CPD-12350 [ C20 H26 O6, tgt=77.13, overall=77.13 ]			(366.63583, 1877.1953)(347.16852, 6038.9697)(367.52682, 1473.0101)(368.195, 1236.16)(345.78723, 213185.6)(346.63852, 45437.035)(347.1767, 893.81)(383.4952, 7815.506)(384.77527, 11472.351)(385.21817, 5639.3267)(366.45584, 1044.7766)(389.17154, 53549.72)(390.17502, 11930.455)(368.15802, 2908.6401)	16.3025
DIMETHYL-D-RIBITYL-LUMAZINE	1614778	2924084	1495836	1471687	2458338	1853422	1485240	1600807	1875429	1290688	1	1660000	2116073	1421829	1793813	2477420	1	1233027	1084872	1	7158689	1	1946180	8791336	1890298	6992323	6752110	5643412	1753807	1710491	5764736	6097175	DIMETHYL-D-RIBITYL-LUMAZINE	DIMETHYL-D-RIBITYL-LUMAZINE [ C13 H17 N4 O6, tgt=82.11, overall=82.11 ]			(325.1134, 79515.89)(326.2286, 9921.742)(327.1202, 1884.19)(307.1015, 225.17)(330.6309, 511.09)(312.69156, 3953.2922)(310.1185, 586.76)(347.0604, 3491.5078)(325.14203, 2327.6091)(350.27005, 79061.66)(349.68268, 12116.204)(350.10934, 1614.5767)(333.09738, 2411.01)	18.5936
CPD-11852	3895642	1684135	1	24020376	4683392	22460546	1	1	976917	10868202	17781060	1	1108150	2510457	3444811	1750142	7762255	1	16273907	1	15404423	5627091	1	7525906	9261398	12534472	4000718	5216525	18459042	18901648	11381908	21012432	CPD-11852	CPD-11852 [ C19H18NO4, tgt= ]			(328.13165, 335.07428)(309.1194, 707.9175)(310.1246, 78.26)(310.83212, 1717.165)(312.1347, 520.14)(344.66373, 5028.0195)(325.5572, 5870.248)(326.1494, 279.17)(347.98395, 217552.67)(348.96945, 25085.223)(349.49524, 7986.2324)(350.1285, 2369.995)(329.1023, 69394.305)(330.10556, 13267.981)(331.1053, 1048.5444)	20.4761
CPD-7409	26089248	29105868	41831728	15092151	619176450	1	1	1	273813792	1	879469760	1	1	1	1	1	1	1	1	1	152395664	1	1	1	1	1	1	1	100267584	1	1	1	CPD-7409	CPD-7409 [ C40H56O, tgt= ]			(553.8631, 941110.0)(553.4329, 290121.38)(554.43665, 56668.6)(536.67505, 62180.348)(535.41675, 31317.857)(536.41406, 6317.46)(557.44995, 3892.7168)(558.4553, 2206.6)(539.2747, 18578.4)(540.27545, 9199.821)(540.78265, 8716.671)(540.4451, 8277.0)(571.47205, 1543391.8)(572.4757, 630860.3)(573.4817, 466208.12)(574.4859, 83556.34)(553.8602, 76144.66)(554.46185, 39650.562)(555.4641, 9681.71)(575.649, 1…	28.6001
CPD-12355	6831709	5759423	6754675	6366388	8915873	3011388	2858405	5220834	8272316	2797792	5817358	7675062	2847331	6900606	6502987	7979611	4937299	1	2886954	3979744	4813869	2863960	3247674	4748971	4321506	4239229	5093564	2982818	4371181	5371424	4545781	5489218	CPD-12355	CPD-12355 [ C19 H25 O7, tgt=85.67, overall=85.67 ]			(365.704, 3511.8245)(367.16406, 379.4427)(347.14938, 85065.82)(348.1545, 17453.05)(349.15417, 2424.2197)(350.164, 393.83)(366.166, 5464.8)(367.1624, 1401.3538)(386.42767, 50039.426)(387.91138, 51439.984)(388.20892, 36428.145)(366.9278, 2051.6921)(368.63742, 5511.4863)(389.44897, 2236.4614)(391.0081, 2772.1812)(391.16003, 4821.293)(371.98538, 1221.2474)(373.11447, 13776.782)(374.11334, 91688.05)(3…	10.4233
CPD-12353	51103504	1	1	42369984	1	36844228	53036172	53965600	1	1	1	1	1	1	1	1	1	1	1	1	59797988	1	1	1	70169760	1	1	1	8656974	1	8943232	11530169	CPD-12353	CPD-12353 [ C20 H26 O5, tgt=71.41, overall=71.41 ]			(346.17746, 1072.3234)(328.16473, 7354.3613)(350.19888, 40577.633)(352.2026, 256.15)(330.17642, 95588.336)(331.18192, 15457.464)(332.18552, 1292.6866)(333.1848, 431.4)(366.5956, 14520.906)(366.46704, 1154.665)(369.2295, 25481.8)(348.9262, 58633.47)(349.92917, 26150.674)(350.8807, 7347.6235)(351.21503, 4873.155)(369.17163, 4560.6636)(351.85886, 11240.531)(354.16846, 12017.405)(355.16376, 16094.79)	20.2705
CPD-12354	20705176	26591416	1	32143582	1	35092112	1	1	1	10926260	8873463	27884936	1	1	1	1	1	14055379	1	1	16520115	3720016	1	1	1	1	1098134	1	1284710	1	1	1993718	CPD-12354	CPD-12354 [ C19H23O5, tgt= ]			(333.66467, 22932.26)(332.1586, 11574.11)(333.148, 4786.98)(334.1472, 455.3)(315.5791, 17307.326)(316.1558, 16845.074)(334.02563, 9569.389)(334.1689, 11798.98)(335.1704, 5912.02)(314.3544, 20137.578)(315.35587, 6147.557)(316.1572, 124.045)(351.10468, 2980.7837)(351.52832, 4041.1282)(353.1988, 11844.79)(354.2058, 7878.635)(332.28406, 35688.016)(333.18045, 3259.78)(358.65308, 2879.71)(336.3358, 599…	7.507
CPD-7408	98314	5389876	1	1077997	420532	1	736688	661938	707731	524331	2043822	1351907	1526944	2238285	1302290	704304	734950	4262381	1	799638	2204702	3143468	1182117	2021224	1102702	1223100	1825734	4637860	556851	671922	1247371	4025852	CPD-7408	CPD-7408 [ C40 H62, tgt=44.50, overall=44.50 ]			(543.33856, 8306.32)(546.4431, 56460.17)(547.64465, 92900.1)(547.501, 48215.566)(548.5035, 206817.61)(544.85834, 55069.51)(545.8643, 22731.037)(545.5048, 1709.72)(560.5205, 40301.57)(561.5248, 15994.136)(562.5264, 5371.15)(568.4767, 7519.9233)(569.4799, 4287.81)	29.6454
CPD-12351	9007766	9243488	8933049	8802557	11366445	10606867	7804185	5215738	8990368	5408517	6830799	9497221	5874300	4921559	5381582	11138708	4393498	7184617	3583863	4130173	6619073	7009923	5304066	5540436	6417578	5918010	6494746	4757897	4991515	6508208	4877235	5644784	CPD-12351	CPD-12351 [ C19 H23 O6, tgt=94.04, overall=94.04 ]			(347.1494, 84369.12)(348.37277, 14871.242)(349.15433, 2475.8801)(350.1645, 499.67)(329.173, 30203.42)(330.27316, 3810.0835)(331.15546, 547.24)(332.1558, 3175.11)(333.1505, 941.64)(366.96503, 1227.9843)(368.30362, 4381.531)(368.8599, 6358.933)(350.44656, 2932.0483)(351.6818, 4016.24)(372.08423, 1299.5756)(373.1798, 18703.236)(374.17902, 32181.705)(374.84366, 22767.033)(375.1495, 10594.321)(352.125…	10.659
CPD-13456	4414916	8609582	4658233	4288238	6625134	5731216	5294175	4690801	4262751	3602841	2768119	3637335	7045994	3593667	6538378	7502277	3460765	7086869	2252442	3797220	1023519	1374918	1504034	1392707	2395037	2013244	1385876	1	1631063	1169094	2120056	13588707	CPD-13456	CPD-13456 [ C21 H16 O7, tgt=94.40, overall=94.40 ]			(380.08694, 839.9789)(363.0829, 4372.11)(365.0861, 24048.37)(381.09467, 180711.67)(382.09793, 36249.64)(383.1003, 6358.7354)(398.79318, 24461.803)(400.1286, 6342.016)(401.133, 1017.48285)(384.1207, 2223.25)(403.07715, 1365.2117)	23.008
INDOLE-3-CARBOXALDEHYDE	11269992	10208971	15797427	13049353	1	13615514	11535381	1	11947364	1	1	1	1	1	1	1	1	10495589	1	1	1	1	1	1	1	1	1	1	7319035	3028045	3363943	1	INDOLE-3-CARBOXALDEHYDE	INDOLE-3-CARBOXALDEHYDE [ C9 H7 N O, tgt=83.97, overall=83.97 ]			(148.06044, 17912.945)(130.04962, 27146.238)(146.06047, 136593.5)(129.32622, 13050.463)(133.0654, 11025.67)(164.08922, 9481.03)(165.09071, 7070.0127)(168.10124, 36602.45)(146.07922, 35858.41)(147.08234, 5784.3022)(173.0571, 138.58)(155.04726, 9036.842)	19.4833
SYRINGETIN	5451772	3638897	7551145	5640878	4403371	4734580	4830910	3950839	4469533	1909855	3400478	3880583	4713254	3416444	4002924	2941815	5391801	3591986	3639765	7884933	10381053	9235700	11090041	10890557	6982595	7232689	8867498	8501218	10297593	11680620	7077904	9713718	SYRINGETIN	SYRINGETIN [ C17 H13 O8, tgt=66.04, overall=66.04 ]			(345.92493, 6242.1406)(346.06927, 13061.829)(347.07254, 2167.8293)(328.05878, 2963.166)(329.0648, 210.04)(363.09818, 273268.22)(364.10043, 32018.605)(365.10275, 3492.3132)(369.05457, 208.75)	18.937
S-N-METHYLCOCLAURINE	32492768	1	1	7891781	1	8298339	9189534	4618358	1	1	1	1	1	1	1	1	1	1	1	1	1	1	1	1	1	1	1	1	10320386	1	1	1	S-N-METHYLCOCLAURINE	S-N-METHYLCOCLAURINE [ C18 H22 N O3, tgt=68.29, overall=68.29 ]			(302.5695, 6547.116)(304.1714, 390.15)(283.15036, 18275.006)(283.1413, 1361.58)(301.16986, 35241.383)(302.1709, 4466.79)(284.66354, 5209.1504)(323.2041, 6952.13)(304.19226, 27333.365)(327.16022, 603702.5)(328.16135, 337917.34)(307.8154, 23162.521)(309.35464, 3989.1118)	16.2311
SINAPOYL-COA	909771	622036	413393	348994	181413	170173	1	1	1	1	1	1	1	1	1	1	268569	1	1	1	1	1	1	1	1	1	1	1	1	1	1	221944	SINAPOYL-COA	SINAPOYL-COA [ C32 H42 N7 O20 P3 S, tgt= ]			(969.34344, 540.4)(970.47284, 489.76334)(971.1356, 141.61)(951.1376, 169.305)(952.1402, 153.68)(972.3465, 3610.7441)(973.9469, 1570.9622)(975.645, 1351.9)(992.633, 630.4267)(997.133, 139.02)(977.6323, 2180.24)(980.80707, 3492.913)(981.1381, 1447.03)	16.2575
CPD-6951	8366456	5579573	3137643	3923524	5178113	3924007	1662826	1674443	1517955	1003417	1359041	1431207	5539551	1555487	1409890	781995	4852972	1391053	1374390	2258513	2604626	2749532	7114055	5480025	672104	3518835	3346166	1868145	4638695	1	3469090	2948021	CPD-6951	CPD-6951 [ C30 H52 O2, tgt=91.53, overall=91.53 ]			(445.81924, 2652.8354)(446.9012, 3967.8281)(448.55035, 2632.2788)(426.88632, 7439.6494)(428.25278, 2638.9143)(451.4262, 233.21)(427.39224, 15369.44)(428.39594, 5647.667)(464.02994, 7770.8657)(465.0335, 3777.748)(444.41873, 7342.305)(445.42108, 3026.192)(468.38898, 72708.95)(469.42648, 20531.357)(470.3936, 4891.3027)(471.39526, 2241.8916)(472.39737, 952.26)(450.43195, 4191.529)(452.10107, 1470.834…	27.1064
GALACTOSE	6617736	1	7646713	4575640	1	1	7788492	1	4526879	1	1	1	1	1	1	1	1	2034955	1	1	2772236	1	1	3952848	1771234	1	1	1	3422180	1	1	1	GALACTOSE	GALACTOSE [ C6 H12 O6, tgt=86.73, overall=86.73 ]			(181.064, 1224.79)(162.95358, 2995.815)(164.56136, 1238.48)(166.06793, 5906.865)(168.0741, 217.02)(201.10397, 190662.42)(203.1061, 15261.43)(180.0866, 197905.39)(181.08939, 17316.023)(182.0812, 248.4)(185.04446, 3513.4976)	14.6711
CPD-14593	5290242	2929091	9492712	9914215	10137574	10494575	8832155	9758891	9151301	2073449	1619321	3361305	4190894	2021900	8067778	3604119	6714679	2290386	4740678	1604585	2001315	703975	5843338	1845319	1686615	1	1616393	1224199	3627121	1420748	820657	868100	CPD-14593	CPD-14593 [ C14 H17 N O8, tgt=66.90, overall=66.90 ]			(328.8711, 19693.166)(330.4018, 6037.368)(331.10632, 4690.492)(309.08044, 39368.39)(310.08405, 4674.0522)(311.08475, 268.5)(312.0897, 38.22)(329.50415, 94156.63)(330.10596, 93465.7)(331.1084, 14678.525)(311.84875, 2792.0137)(313.101, 2774.34)(346.56183, 420.61642)(329.01105, 4454.01)(331.12842, 26722.457)(351.8179, 2038.4)(332.9467, 33236.727)(334.43222, 7932.776)(335.85422, 14038.699)(337.091, 1…	7.30081
CPD-14594	32365076	30290856	38255964	37009344	31921072	33586696	33793624	31953824	31645960	23997048	29895712	32061572	35686808	29568266	17197532	14350610	34402492	35056412	13322589	39231456	9713385	8169408	8104439	8922527	6802919	7299258	7766468	6192636	8112175	7364252	6184537	7484329	CPD-14594	CPD-14594 [ C16 H27 N O11, tgt=97.46, overall=97.46 ]			(409.89044, 38857.64)(411.17032, 9831.738)(413.1687, 3023.3923)(391.1518, 301.44)(413.1764, 517.32)(396.415, 3921.5334)(395.66226, 3968.256)(397.1689, 22735.865)(427.41245, 2319.5945)(431.20248, 12719.427)(432.2045, 13878.73)(410.385, 31885.771)(411.18896, 797.63)(433.9519, 1803.094)(435.6524, 6240.4224)(437.159, 10834.495)(414.6221, 952921.7)(415.13892, 220720.45)(416.14084, 36830.867)(417.14508…	20.0092
CPD-14592	67984832	2049442	63913356	68543312	77923976	1044478	3627458	1045125	9011025	86104640	1459297	63970092	71560520	69068912	64599896	69944600	1260131	3121431	1040059	8150719	1567722	915958	2649477	1200072	1299881	3513161	3217783	2380689	1069905	18362778	2470018	3005452	CPD-14592	CPD-14592 [ C8 H7 N O3, tgt=86.24, overall=86.24 ]			(167.90642, 10301.513)(167.54901, 2291.1125)(149.6389, 1165.056)(151.0396, 3665.57)(166.14865, 2412.06)(153.0538, 1441.392)(183.07857, 673531.94)(184.08113, 60733.324)(167.0714, 8210.721)(168.07372, 492.04175)(189.11613, 47901.3)(190.03926, 13113.0)(191.04094, 1472.238)(175.03615, 219.51001)	13.6967
CPD-6959	1084808	1097551	41902776	46774436	1419242	4471057	49363524	45731040	1749358	1633362	1	14114286	4531752	48153880	49637236	1	15371691	2738552	1	5724436	2592281	1	2337749	2090677	41675308	1	3587600	1	2243037	14650149	38328536	64790984	CPD-6959	CPD-6959 [ C16 H16 O3, tgt=63.44, overall=63.44 ]			(257.63718, 8231.221)(258.47168, 26307.748)(259.5191, 3081.3188)(260.11923, 1788.4775)(241.86026, 2840.0168)(242.737, 3355.595)(243.1139, 3072.88)(260.8616, 1906.9647)(261.4623, 845.8117)(240.18683, 6820.143)(240.4427, 4395.56)(274.50464, 3481.6816)(258.2443, 13780.631)(258.14203, 9708.925)(280.78702, 3411.7515)(281.67734, 3979.2559)(282.85452, 3662.085)(262.30792, 4909.3257)	9.3491
CPD-14596	3012409	5656110	3719784	3048012	4308752	4313823	4834165	4102582	3796383	2947788	2316665	3056811	5686685	3206513	5552070	6143670	3165632	5928984	1855609	3483503	664922	966382	1793572	1411152	1378433	1265171	7060766	3313282	1196430	1	1136540	3081307	CPD-14596	CPD-14596 [ C17 H29 N O11, tgt=95.07, overall=95.07 ]			(423.49127, 2685.7747)(424.18744, 848.87415)(405.8795, 13869.198)(406.4982, 3831.7932)(407.16034, 444.35498)(427.1913, 20435.305)(429.19696, 8268.135)(410.41095, 9485.592)(410.85034, 10728.376)(441.61053, 2177.6807)(443.2142, 215.53333)(425.72083, 24119.014)(426.51242, 240331.6)(426.7051, 12603.055)(446.36786, 35009.29)(447.17273, 12032.382)(428.42877, 130419.28)(429.47736, 25578.432)(430.418, 44…	21.3297
CPD-6954	3017352	1467054	1972608	4244081	3608030	3073520	2066940	1675247	2638094	2869571	2873576	2841267	3879742	926218	1193182	1111226	25762928	1564555	1879082	2036547	5281525	10071277	7479313	8584077	6650729	4403081	5210418	6790084	9650371	6809822	6475024	1	CPD-6954	CPD-6954 [ C15 H13 O6, tgt=98.54, overall=98.54 ]			(289.07098, 2982.6235)(290.07465, 187.13)(271.06055, 197540.22)(272.06378, 33217.543)(273.06717, 4374.1685)(274.0668, 499.6083)(290.0797, 792.43)(309.1087, 5450.13)(292.6007, 347.33667)(315.06827, 2464.4292)(297.05762, 1654.2489)(298.0588, 242.33)	17.2343
CPD-6956	402610	211816	510602	419540	268532	582988	509751	243852	611465	988764	607670	172004	990885	934276	311431	276517	1	1	827725	386308	245299	1	530440	642984	429531	624718	403340	147829	586327	455243	331244	674713	CPD-6956	CPD-6956 [ C13 H9 O4, tgt=52.11, overall=52.11 ]			(232.42216, 1811.4008)(212.29427, 1232.5792)(215.05252, 356.53287)(233.06328, 645.206)(235.0717, 80.67)(212.54558, 1567.6143)(249.6918, 2169.7085)(250.99617, 1578.8259)(231.66418, 796.645)(233.0821, 821.31)(256.05194, 1722.5826)(257.05402, 294.24588)(236.9791, 1424.6835)(237.78806, 268.9425)	3.19303
CPD-4619	4353113	4016861	5062332	5660021	5518124	5457984	6244220	5478685	4848613	2349600	1	4397018	5058429	4563050	5726763	1	3971926	2287561	3642267	1	2567709	1	4188493	5309424	5027054	3738562	4980445	4184747	4276158	1	1	8010386	CPD-4619	CPD-4619 [ C16 H23 N5 O6, tgt=86.16, overall=86.16 ]			(382.04944, 1759.1853)(383.1052, 7705.0747)(364.00433, 11064.846)(366.47925, 38438.81)(367.72922, 42482.24)(368.16855, 13074.599)(382.45718, 1943.8358)(364.28738, 8677.059)(399.77335, 2416.4885)(383.191, 9445.47)(404.1555, 196854.75)(405.16116, 39978.78)(406.1633, 7301.3)(407.16107, 683.25433)(390.6064, 24947.213)(391.1525, 16798.86)	12.4498
CPD-8192	2425117	600990	3031498	747822	1	638685	3144644	2678577	657452	481479	645131	1269132	834808	562495	631569	568444	2710485	629310	517324	855217	867250	1047547	1283675	1035404	1656101	1541581	1023480	1717803	1476524	2199991	1	3605107	CPD-8192	CPD-8192 [ C14 H14 O3, tgt=84.27, overall=84.27 ]			(231.9328, 80578.234)(233.10197, 13987.985)(234.60605, 2003.335)(235.1078, 830.51)(213.78389, 2466.0112)(214.94807, 2309.177)(231.10248, 64506.67)(232.10463, 16412.223)(233.10074, 12078.775)(213.78586, 4361.8755)(215.09624, 6772.66)(251.95027, 9499.227)(232.91638, 16117.819)(235.13385, 5629.7085)(257.76425, 3108.5881)(258.09854, 2708.5452)(237.07709, 2500.5947)(238.07954, 409.605)	14.4793
6-O-METHYLNORLAUDANOSOLINE	1	8440134	1	2483076	1	10789201	6196061	10481235	1	5296463	4470977	1	1	1	9266730	2962035	9161241	1	2258930	3528453	7955443	1	1	1	1439460	3842137	3729387	3661368	1	2946915	1	1	6-O-METHYLNORLAUDANOSOLINE	6-O-METHYLNORLAUDANOSOLINE [ C17 H20 N O4, tgt=68.26, overall=68.26 ]			(302.56805, 29323.018)(303.63565, 4680.31)(284.1309, 6629.32)(285.1234, 795.62)(303.21494, 92240.445)(304.34622, 6748.9624)(306.1398, 187.39)(289.1502, 46780.16)(322.9947, 12561.169)(323.91788, 34046.453)(324.82867, 23340.42)(303.3651, 25014.049)(306.92697, 14423.51)(328.832, 28012.002)(330.04327, 4537.703)(309.45776, 2760.884)(311.6311, 1898.0538)	12.1499
CPD-8191	981910	1	1344264	1322010	1335045	1760685	917238	1599143	1500848	1766380	1558424	1363284	2688822	3292205	1307774	2657715	20015874	386970	3595173	2701792	1376818	3200612	1446437	3035902	9963401	1	1124173	1572427	1363967	9236832	1517939	1494076	CPD-8191	CPD-8191 [ C14 H14 O4, tgt=73.29, overall=73.29 ]			(248.26028, 4134.895)(249.0958, 443.6506)(230.82178, 4953.8013)(231.08475, 3075.8599)(250.82294, 2437.1172)(250.43787, 1870.9332)(249.1134, 38.99)(232.40422, 10603.177)(231.59468, 7344.8813)(264.12363, 29635.822)(265.12457, 7423.9497)(266.1338, 251.91399)(247.00856, 28685.299)(247.11888, 18231.965)(248.12149, 1392.612)(272.78802, 2361.607)(270.08, 1875.88)(254.47769, 2921.3079)	8.34994
RIBOSE-1-ARSENATE	1	1	1	115908	142867	1	1	1	1	738469	273045	1	1	263562	1	1	1	1	310622	1	1	1	1	1	1	1	1	1	1	1	1	1	RIBOSE-1-ARSENATE	RIBOSE-1-ARSENATE [ C5 H9 As O8, tgt=84.27, overall=84.27 ]			(271.9485, 4740.13)(255.9439, 638.34)(272.95734, 12514.485)(273.9581, 1519.0934)(272.97757, 1743.1967)(296.94315, 6853.8813)(297.94595, 3166.8347)(280.9377, 824.79)	6.51082
DIHYDROKAEMPFEROL-CMPD	2308563	3483309	3360652	3508659	2674541	2449515	2026023	1	2161366	2272642	2127544	1	1	1	1036785	958661	22277582	1427792	1	1	4550370	8685164	6438740	7448260	5654308	3774514	4493980	1	8254572	6039914	5674045	1	DIHYDROKAEMPFEROL-CMPD	DIHYDROKAEMPFEROL-CMPD [ C15 H12 O6, tgt=98.04, overall=98.04 ]			(288.05875, 4756.3267)(270.41895, 764.97174)(289.0708, 4698.1357)(290.07645, 339.14502)(271.06058, 232370.05)(272.06375, 38959.355)(273.06747, 5247.3555)(274.06665, 579.122)(307.90216, 1872.972)(288.58893, 9601.933)(290.59268, 1184.4266)(315.14853, 2366.189)(295.7195, 1472.5599)	17.2348
CPD-4620	4353113	4016861	5062332	5660021	5518124	5457984	6244220	5478685	4848613	2349600	1	4397018	5058429	4563050	5726763	1	3971926	2287561	3642267	1	2567709	1	4188493	5309424	5027054	3738562	4980445	4184747	4276158	1	1	8010386	CPD-4620	CPD-4620 [ C16 H23 N5 O6, tgt=86.16, overall=86.16 ]			(382.04944, 1759.1853)(383.1052, 7705.0747)(364.00433, 11064.846)(366.47925, 38438.81)(367.72922, 42482.24)(368.16855, 13074.599)(382.45718, 1943.8358)(364.28738, 8677.059)(399.77335, 2416.4885)(383.191, 9445.47)(404.1555, 196854.75)(405.16116, 39978.78)(406.1633, 7301.3)(407.16107, 683.25433)(390.6064, 24947.213)(391.1525, 16798.86)	12.4498
CPD-4621	4542581	2844422	5138789	5630643	5626794	4781218	5489737	1	4085503	1685257	5508622	3592566	3908931	3640268	3957650	3247356	1	3604329	5046993	2969157	2627242	3079363	3243798	3155514	3005345	2548187	2904944	3063729	4791273	2792090	3382222	3459221	CPD-4621	CPD-4621 [ C22 H35 N5 O11, tgt=97.08, overall=97.08 ]			(530.2294, 739.7)(548.9999, 2367.275)(549.249, 1559.77)(550.2568, 5249.59)(530.4675, 2706.2617)(531.3861, 1917.5272)(532.74066, 1519.8018)(533.7409, 1370.9266)(534.24054, 1028.6633)(563.83936, 760.2567)(546.21716, 1362.9084)(547.25964, 387.22498)(571.9785, 324.5325)(550.3466, 102281.86)(551.3499, 26544.795)(552.21924, 6607.0674)(553.2242, 575.67725)	6.89635
CPD-4622	19164960	14121439	19356304	6630661	12625704	6973636	8936865	17342288	6817789	8225877	13701249	12872440	5701572	9410696	16402865	13576284	3846789	3235001	12750948	8274878	4100201	18613570	14563896	15606445	1	15756437	5722801	4981515	5472660	17001644	14254383	7479908	CPD-4622	CPD-4622 [ C22 H33 N5 O11, tgt=59.44, overall=59.44 ]			(546.02625, 3265.2568)(546.2313, 4395.32)(549.2343, 4984.65)(527.307, 6406.0522)(530.55634, 1170.2367)(531.2235, 1658.61)(548.0585, 3538.5845)(550.2397, 4335.0737)(529.26044, 11888.499)(529.97516, 5845.6455)(531.91656, 10160.309)(563.1705, 15522.923)(564.45905, 5785.841)(566.26556, 1094.095)(544.8565, 41063.258)(545.1636, 11865.69)(546.04846, 3017.0378)(568.2099, 21123.535)(569.925, 69827.4)(571.…	16.0262
CPD-10123	210286	165903	187478	238679	256222	213079	206036	209332	2085296	6972824	6246182	1	6188048	5445283	10153796	8156058	3487664	1105047	6837610	1	1	96466	2126971	1471466	1	1210876	1705773	1214892	1045378	1	2672446	1458855	CPD-10123	CPD-10123 [ C39 H66 O33, tgt=57.38, overall=57.38 ]			(1064.3381, 82.91)(1044.339, 246.73167)(1068.1221, 1691.3738)(1070.1227, 4277.035)(1070.371, 3762.13)(1045.4608, 4189.9004)(1046.5948, 303.18002)(1086.4009, 340.45502)(1063.3793, 301.38834)(1063.3927, 162.89)(1087.4033, 1017.2594)(1090.5436, 766.94794)(1090.3435, 522.38)(1091.3464, 280.42)(1092.3442, 954.3)(1067.9645, 14132.493)(1069.2599, 10974.497)(1072.0879, 2429.8474)(1073.1178, 1727.7378)(10…	20.6711
CPD-10122	1467161	1	1914007	513057	1	1	1916546	1488334	2728371	1	807442	1	1	1	691084	1	1	1	1	1	2324863	1323292	1752438	1180189	1	1	2156235	1604850	875950	1	1	1	CPD-10122	CPD-10122 [ C24 H42 O21, tgt=77.17, overall=77.17 ]			(668.0777, 488.67142)(672.2401, 361.93)(648.8281, 4244.6763)(650.22064, 2026.2726)(650.214, 193.08)(671.80164, 4424.5435)(652.6012, 6636.7573)(653.3726, 4882.743)(654.23615, 1550.004)(655.2416, 825.79004)(685.8292, 23038.09)(686.38416, 11121.483)(686.25684, 2601.7783)(668.9206, 2995.9062)(670.09015, 2722.675)(670.96967, 2740.707)(672.2509, 3196.73)(691.21954, 1084.2072)(691.7171, 271.755)(673.907…	14.9115
CPD-10129	842622	1658804	2443659	785460	1825507	569426	752071	1769281	1984070	1724313	1281400	699034	565903	1456749	1	492855	1	1961689	578602	1904610	1818054	1295609	1	1293985	1566204	1855845	1	4448738	660753	3163811	492555	1	CPD-10129	CPD-10129 [ C10 H13 N5 O3, tgt=69.91, overall=69.91 ]			(251.58432, 6398.2026)(254.25203, 1719.9044)(256.1116, 258.39)(234.09384, 17045.842)(235.45407, 1604.5479)(237.43219, 680.3333)(254.82181, 5271.506)(254.44386, 2205.9333)(238.85806, 22590.795)(239.1127, 59116.87)(271.9814, 16324.299)(272.7428, 14413.818)(273.34473, 14238.556)(274.14484, 2444.8667)(254.17366, 4845.3687)(255.88312, 3535.8035)(277.18604, 4365.1577)(278.10168, 7280.365)(258.9666, 567…	19.0737
CPD-8186	6420294	8344920	1	6316463	1	4757669	1	1	1	1	1	1	1	1	1	1	1	1	1	1	2877046	69342984	1	4904586	1	1	4898189	3822420	2207256	2919126	1	3332106	CPD-8186	CPD-8186 [ C9H6O3, tgt= ]			(163.03912, 419308.4)(164.0425, 40790.06)(165.04745, 3423.4563)(166.0491, 1685.45)(145.02798, 3594.504)(146.0319, 480.73)(184.07413, 10238.235)(186.02495, 156.64)	23.0874
PHLORETIN	3738925	386904	9890090	3661896	1	1	6347021	6584977	4556133	920766	2016421	1	1	1	4830111	1808853	8043470	1	1	15626484	8026581	9405693	10078079	12165852	5567025	2710045	4623724	10053034	8311387	12119341	5832466	21550126	PHLORETIN	PHLORETIN [ C15 H14 O5, tgt=85.45, overall=85.45 ]			(278.97513, 9443.0625)(279.0945, 13499.98)(256.07397, 2771.7798)(278.10193, 6613.0356)(257.08145, 258454.98)(258.08505, 41570.71)(259.09113, 11823.63)(260.0961, 799.4567)(292.2775, 923.8752)(294.12576, 2628.0051)(274.88577, 396.11108)	23.8881
N-METHYLANTHRANILOYL-COA	2635916	2016363	917435	1932806	217827	649832	268923	265546	188759	232879	204754	186971	247445	1	632671	381971	248801	197185	218620	232401	1	188084	185302	149860	1	1	454408	651500	1	1	1	1	N-METHYLANTHRANILOYL-COA	N-METHYLANTHRANILOYL-COA [ C29 H39 N8 O17 P3 S, tgt=13.37, overall=13.37 ]			(899.1404, 219.45)(880.6205, 3217.1848)(897.1346, 377.72)(899.1768, 112.92)(923.5137, 2961.2988)(923.47363, 2596.1667)(902.3867, 3498.1218)(903.7303, 923.60596)(907.1359, 3097.37)	28.8466
PYRIDOXAL_PHOSPHATE	4557675	8736515	8730740	5599659	6413924	8478040	7694489	7730744	7795025	3652336	2759755	5899782	6644954	201625	5789086	7404377	5487842	3151576	6970600	5646004	4434729	8687121	3193916	5005785	5421594	7605221	4519763	2972552	3998027	4138567	3675878	7219182	PYRIDOXAL_PHOSPHATE	PYRIDOXAL_PHOSPHATE [ C8 H8 N O6 P, tgt=69.14, overall=69.14 ]			(245.00674, 34902.57)(246.01463, 3037.099)(229.0043, 671.03)(248.77298, 37215.414)(247.51855, 235.07501)(266.05344, 2456.0007)(249.07376, 25189.604)(250.04431, 5279.3516)(270.67056, 1050.0466)(270.0042, 121.42)(253.99756, 4251.19)(254.9969, 534.26)	1.72609
CPD-12362	1043246	754866	714901	5637461	797319	4872479	534674	1139453	872481	431790	1	913735	3647500	775471	1170294	1432038	4118809	1	486589	5052022	1	777674	1630307	2409235	2947227	2140086	1752364	2660958	2476665	761727	1012355	4105447	CPD-12362	CPD-12362 [ C19 H25 O6, tgt=78.56, overall=78.56 ]			(351.42203, 6982.973)(354.17664, 10435.564)(331.15485, 31895.457)(332.15897, 7696.921)(333.1502, 4037.54)(352.43036, 2640.6277)(369.94492, 13447.125)(370.98645, 12481.902)(372.2149, 11236.41)(352.6679, 3073.8965)(352.5297, 6673.895)(352.1964, 2763.855)(374.75168, 3178.8838)(376.33218, 884.5332)(358.15295, 2378.11)(359.1548, 6188.34)	11.2327
CPD-12365	417114	416078	477366	405501	327631	387979	354526	375714	425003	273738	657459	425131	619117	468252	387154	385005	689561	403507	680830	439734	435133	362300	388154	408412	313793	442902	424401	348932	338553	440721	427659	479954	CPD-12365	CPD-12365 [ C10 H12 N5 O8 P, tgt=80.67, overall=80.67 ]			(364.29892, 1106.915)(347.03964, 411.84)(362.05307, 2077.4546)(363.05646, 242.66)(380.3926, 660265.0)(381.99265, 126485.08)(383.08023, 87499.77)(384.0831, 11239.966)(363.06976, 1869.2368)(387.0359, 556.22)(368.0233, 1143.34)	1.51184
CPD-12367	482172	527158	611103	617184	679540	728477	1108728	927043	859694	230574	213774	559325	608357	464616	703653	516719	488353	284902	474417	741956	254464	235185	256388	279645	306683	203417	260216	233636	268415	316346	268291	415280	CPD-12367	CPD-12367 [ C10 H12 N5 O9 P, tgt=72.36, overall=72.36 ]			(395.07208, 22496.934)(396.0755, 3427.7803)(397.0739, 199.11499)	11.3942
CPD-12366	271804	539061	289150	258384	324161	225277	1	1	309615	349671	209293	1	212767	1	1	120417	1	211471	196566	1	1	1	1	1	1	239073	1	1	1	1	1	1	CPD-12366	CPD-12366 [ C10 H12 N5 O15 P3, tgt= ]			(538.97375, 1141.7069)(539.9766, 334.79)(540.9716, 346.34)(556.9966, 520.86)(539.9864, 1599.0424)(562.9463, 217.58)	1.42403
N-DELTA-PHOSPHONOACETYL-L-ORNITHINE	513939	521460	525056	260243	436182	528082	1	301668	575336	1123959	6831371	301384	431061	1	542412	338752	2463933	477984	1	1473291	405124	579918	363606	952699	746232	524087	445898	1	905890	1033977	1	503215	N-DELTA-PHOSPHONOACETYL-L-ORNITHINE	N-DELTA-PHOSPHONOACETYL-L-ORNITHINE [ C7 H14 N2 O6 P, tgt=47.24, overall=47.24 ]			(253.39261, 3440.8818)(235.42284, 11439.619)(236.5519, 6272.7803)(237.0458, 12102.08)(238.0472, 460.21)(258.44186, 3106.554)(255.0703, 146.59)(241.0683, 127.9)(273.85062, 4709.6787)(273.69806, 3754.9263)(273.7593, 2685.2834)(256.86896, 8259.07)(277.7193, 650.15497)(261.24612, 32471.234)(262.0478, 1528.85)	4.98019
CPD-12368	1	1	4725550	5291499	4754588	1	1	3202115	1	1	742886	1	1	2110989	1	3186754	10140162	1	1	1	1003043	1	2819524	2589216	2633922	303908	2080434	1510060	6194056	2560446	429446	429319	CPD-12368	CPD-12368 [ C40 H58, tgt=30.73, overall=30.73 ]			(541.798, 2313.9558)(542.47186, 2372.7327)(541.9274, 1885.0046)(542.8115, 1122.88)(560.7701, 9481.725)(559.70294, 10005.424)(558.50226, 748.755)(563.6171, 645.2884)(566.4647, 37.52)	29.485
CPD-12360	4631741	15758032	5471674	3240729	1095217	2793750	5094300	4678968	3000215	1	1510269	1989837	905117	1374162	2769955	1390548	4421063	1	1888440	5036495	5721582	2047753	1610380	2295757	2206179	1385852	3248036	5391212	1802898	2549201	1702957	3249976	CPD-12360	CPD-12360 [ C20 H28 O6, tgt=70.36, overall=70.36 ]			(366.74905, 906.94446)(346.92828, 61480.68)(347.17944, 10836.644)(348.1832, 322.08)(367.8965, 7120.2534)(368.70636, 6660.7734)(350.39716, 15314.354)(351.1999, 5290.12)(352.196, 7121.25)(383.11774, 4838.221)(384.7741, 151364.61)(386.2334, 64725.52)(366.04453, 10847.108)(366.09152, 6944.781)(387.87366, 66645.91)(388.18484, 96694.23)(369.16995, 52765.016)	14.6868
CPDQT-349	1	599533	1196817	768033	2597352	1949952	1	2117771	976408	2219116	1342883	2507416	3877952	1867949	3358772	1	1	2987599	2161186	1110474	1706310	1932055	2341144	3552765	1293936	2634941	4716092	3785957	4048127	2930351	1469145	567339	CPDQT-349	CPDQT-349 [ C9 H19 N O2 S, tgt=58.16, overall=58.16 ]			(208.28131, 4630.5137)(191.60349, 1595.5388)(192.10237, 2203.4827)(206.4904, 14475.124)(208.1078, 351.46)(188.10922, 15619.175)(189.10295, 440.60498)(190.1082, 1695.47)(225.01294, 28046.67)(227.1507, 11597.23)(206.13866, 98749.68)(208.50667, 36886.57)(209.35957, 14402.739)(228.88864, 6447.903)(229.80428, 1324.4514)(230.10179, 1317.2457)(210.78665, 5836.476)(211.8211, 1511.6547)	9.63223
CPD-8171	1286593	1	2441768	3516571	1	2028196	1	588341	1	1	1	1	1	1	1	1	1	1	1	1	874426	451002	1	1	1	1	1	1	1	1	1	1	CPD-8171	CPD-8171 [ C41H68N7O17P3S, tgt= ]			(1056.3563, 210.23668)(1057.3573, 477.82333)(1062.3604, 23.91)(1037.5544, 3902.516)(1038.3511, 2847.84)(1039.3478, 1793.89)(1040.3337, 408.72)(1038.3546, 6369.013)(1039.3524, 4061.17)(1040.3464, 700.255)(1075.3843, 329.88)(1077.3906, 197.19)(1080.0099, 1737.11)(1082.681, 1959.0468)(1085.3473, 2720.9)(1065.0187, 97.60999)(1061.3425, 34.55)	29.9478
OH-MYRISTOYL	700899	570694	716819	1755199	1069110	1	153247	126229	329836	1	152313	692878	498070	1	259060	368149	179648	746634	185337	120642	233477	238304	244555	328064	383720	188280	331851	237061	343046	275803	351620	281743	OH-MYRISTOYL	OH-MYRISTOYL [ C43 H75 N3 O20 P2, tgt=50.42, overall=50.42 ]			(1019.5764, 3087.2612)(1018.4431, 559.42)(998.9021, 3201.6553)(1000.65497, 3408.3047)(1001.269, 1188.4967)(1002.4362, 651.99)(1003.44, 252.0)(1021.23505, 3241.039)(1021.4584, 3718.2148)(1022.4712, 1417.79)(999.00275, 5427.2583)(1000.4315, 4728.5273)(1001.4358, 1228.04)(1002.4393, 156.86)(1035.7379, 2480.1296)(1037.436, 2401.0889)(1038.7942, 2255.0938)(1039.693, 1120.772)(1019.9855, 564.97504)(104…	13.257
CPD-8177	9382927	15289299	7467081	9684511	11960956	616508	4154333	14225356	73963704	5666603	50390284	726619	18643124	29368108	827373	998341	1	1	14218606	716756	833613	820629	771606	2035411	780821	468343	23494044	13723496	883253	19695812	24767314	3409002	CPD-8177	CPD-8177 [ C55 H71 N4 O5, tgt=50.23, overall=50.23 ]			(869.50433, 9274.812)(870.1488, 4339.1265)(870.8011, 6023.5967)(871.8078, 2736.31)(872.80145, 3118.5435)(873.7015, 1486.2299)(874.55206, 2073.5334)(849.78107, 8206.008)(850.5278, 11516.43)(851.5542, 1621.03)(872.0964, 9744.59)(871.69977, 5228.867)(873.5633, 9594.735)(874.5658, 7371.105)(874.5583, 9972.7)(855.22235, 9092.804)(854.5435, 5680.2446)(886.67487, 32040.754)(887.9975, 123847.63)(888.9995…	17.5896
CPD-12399	1767952	1592980	2047764	2022429	1751304	1801396	1775239	1613608	1582731	1172306	1532725	1	1798018	1473523	1662316	1480069	1824235	1790477	1343847	2018909	1	1810838	2213058	1872846	1128805	2784373	2904990	2314544	1247733	2340301	1	1518601	CPD-12399	CPD-12399 [ C18 H31 N4 O7 S2, tgt=78.32, overall=78.32 ]			(480.15796, 1226.335)(485.1607, 331.37)(462.06223, 6330.2573)(462.1588, 16973.96)(463.1585, 4681.3)(464.1605, 349.06)(481.16922, 4309.107)(482.17062, 1308.5466)(462.60205, 23592.748)(463.15933, 10528.577)(464.15933, 2444.71)(497.67862, 2073.6165)(499.30615, 8736.1455)(500.1948, 93368.66)(501.2017, 26273.79)(482.63916, 4985.5625)(480.1925, 7270.13)(502.78122, 8921.268)(503.15372, 2526.6619)(484.40…	18.2681
CPD-6989	276773	371137	386286	654934	483666	336953	187732	445380	263502	268559	212419	606818	459903	292880	456810	505326	1	803837	299661	326396	662182	157547	480880	166952	300211	221992	1513932	1	185952	461978	1	254613	CPD-6989	CPD-6989 [ C13 H9 O5, tgt=90.10, overall=90.10 ]			(246.04529, 74.44)(228.70543, 11081.31)(228.03795, 2083.805)(248.81041, 17319.12)(250.06526, 1368.4474)(251.06624, 230.31667)(231.05052, 26979.518)(232.05444, 2477.5146)(233.05586, 403.245)(265.01, 8423.385)(266.15982, 3180.8997)(267.0895, 195.93333)(246.94951, 2894.679)(247.82733, 627.47)(272.0425, 2838.5662)(273.0434, 195.285)	16.0887
CPD-12398	2061432	1875309	3043860	2280776	2161009	1935136	1	2895200	3465291	1	2615018	8274858	5143940	1822476	1626639	1886535	1	6395895	3111048	2918246	932267	1324930	5369991	4761323	6060361	2306149	1171298	7961456	2561224	2287946	2415217	2647509	CPD-12398	CPD-12398 [ C8H17NO2S, tgt= ]			(193.62659, 2120.586)(175.37558, 16313.198)(178.0881, 3485.6594)(192.47911, 1703.0264)(193.10251, 140.42499)(176.028, 3617.3308)(175.09137, 1473.995)(210.4648, 58818.08)(210.1332, 1387.98)(211.1248, 3862.02)(192.54921, 10111.459)(194.22604, 30406.266)(195.12291, 33490.36)(214.67314, 3030.7651)(216.25398, 2382.1016)(217.91888, 8828.708)(218.0852, 15755.8)(198.33656, 3393.1465)(199.90176, 2531.4666…	11.5778
CPD-12396	810604	982815	1000156	3387725	966839	963487	900811	1	910788	546631	748243	1	1052583	1	1556708	933848	1232986	1072749	1857279	920453	1	656843	958626	4056723	3015703	1	905002	638264	1	3082590	4280161	1	CPD-12396	CPD-12396 [ C17 H29 N4 O7 S2, tgt=56.24, overall=56.24 ]			(466.88892, 5255.167)(467.54794, 24500.55)(468.0687, 38324.14)(469.14813, 9595.885)(470.14975, 2061.887)(448.63416, 3838.0352)(448.13986, 1102.0133)(449.1256, 400.64)(467.3548, 3333.702)(467.15674, 1657.1167)(449.25378, 41543.508)(449.57294, 13416.972)(451.147, 452.51)(454.1375, 2685.14)(486.9136, 2266.0034)(487.05627, 3911.0688)(489.18124, 2412.145)(467.75424, 6331.0522)(468.42102, 5257.0083)(49…	17.6881
LATHYRINE	8488950	4046235	3123201	8768164	6953100	8938030	5220775	1	9776639	4681875	2200861	1485003	8233644	3348255	5103280	1697331	2706853	2082868	19167816	2294414	2241065	1364953	2317140	1263958	2058604	1741101	2423080	1874657	1	2029812	7784883	6541453	LATHYRINE	LATHYRINE [ C7 H10 N4 O2, tgt=67.97, overall=67.97 ]			(182.08144, 60911.902)(183.08385, 7117.0894)(165.00038, 17705.62)(165.94315, 46753.55)(167.07687, 12246.55)(169.07973, 61.11333)(185.15338, 9766.398)(185.75844, 11361.331)(186.0927, 668.08)(165.47682, 4950.303)(167.07669, 4135.0)(204.75938, 7405.5566)(205.1219, 1127.22)(186.17937, 4608.6465)(187.00092, 9549.788)(187.1116, 10182.55)(207.69933, 876.5413)(208.0704, 877.24)(190.15611, 2766.3772)(191.…	6.28887
CPD-12395	1541572	1782893	1075027	981656	1413031	886148	439136	464782	1	658793	1	2009963	1	1305234	316848	1393884	1	385581	1620379	1463172	1	1	2955935	4868054	863823	2161471	1961887	3046241	1	2841114	807093	896843	CPD-12395	CPD-12395 [ C7 H15 N O2 S, tgt=56.87, overall=56.87 ]			(179.76756, 3452.431)(179.58012, 1823.08)(181.41579, 8656.7705)(182.0814, 14249.35)(161.40756, 12106.298)(164.07225, 4658.56)(180.628, 1990.997)(180.4189, 1504.93)(160.9926, 5059.9233)(164.0766, 5409.98)(195.71683, 33979.11)(196.11388, 4450.012)(180.2036, 2834.9036)(182.1091, 11118.31)(201.39037, 3821.127)(202.68045, 5061.811)(203.69582, 2035.0369)(205.07095, 1531.1499)(184.22987, 1833.0878)(187.…	14.1374
CPD-4604	766921	597759	703728	837056	945866	834056	1	976354	855852	1	1	1	1	1	1	1	1	1	1	1	592515	1211927	1095434	1	762335	601615	658435	527022	675450	1066560	543016	1	CPD-4604	CPD-4604 [ C12H11N5, tgt= ]			(226.10582, 1342.16)(226.10864, 3090.4556)(243.57883, 3135.3967)(244.1376, 3241.02)(245.1341, 482.78)(248.09245, 23149.904)(249.09535, 3620.8618)(250.0904, 260.46)	9.43456
CPD-8179	741706	883255	972623	997505	1021875	1040843	1002534	939295	992600	390167	404065	1064908	1143115	886204	1114229	1000675	1265736	648315	673078	997874	1012738	1312117	1266557	1689081	1416016	1036338	1143661	1085562	1288170	1506649	952535	1761262	CPD-8179	CPD-8179 [ C6 H3 N2 O5, tgt=87.24, overall=87.24 ]			(201.03783, 66512.25)(202.04071, 8370.058)(203.0348, 2471.9565)(188.03865, 491.846)	15.7304
CPD-12394	85650344	93452024	100856232	96703528	93191792	201856320	87289384	88284160	90990776	49205336	181733392	1104361	86728064	75913216	195434992	180469184	210860368	1	165770704	1	119549568	2590758	132476472	142112016	106120776	124681576	116945752	2170247	122810528	109578824	1978441	6157326	CPD-12394	CPD-12394 [ C11 H21 N3 O4 S2, tgt=63.17, overall=63.17 ]			(324.84335, 2125.3835)(326.0931, 509.43665)(329.10217, 9391.781)(330.10385, 555.992)(307.01285, 994.3608)(344.13065, 423.67252)(323.12265, 4052.2852)(324.1342, 291.41)(351.0867, 302.115)(330.07364, 56600.1)(331.07782, 21015.021)	20.4905
CPD-8178	1557710	10771861	48765040	17948340	1863316	25353396	41338004	48263008	8076362	2702773	4653620	1	4962045	5145226	4923863	10481256	2484350	1464494	16803856	52587224	1	365027	12927057	3040834	1289877	258942	675909	491577	9507515	6500013	7570315	12903647	CPD-8178	CPD-8178 [ C55 H72 N4 O6, tgt=60.98, overall=60.98 ]			(885.1377, 7638.424)(885.5513, 5190.478)(886.5482, 4452.05)(887.5726, 341.76)(869.3696, 5910.172)(873.5594, 6576.2676)(888.0217, 14475.181)(888.9621, 15316.763)(889.063, 8550.03)(891.5581, 10749.65)(892.56, 25692.59)(871.4769, 10671.604)(872.13947, 5480.81)(872.1795, 8080.901)(872.3941, 2304.5884)(872.9505, 5076.156)(873.5609, 1571.0175)(874.5535, 3174.94)(904.5149, 17034.627)(905.2355, 29987.36)…	23.5902
CPD-12393	86971216	1525859	2354078	74492840	2904638	1429218	2375058	1816614	3629255	2060932	1590132	1535229	72105008	39744448	2188526	1	2127448	51192584	887944	4567980	1911772	1349668	26314476	2045463	2271410	3599556	17635600	1587958	1943210	1850159	26035784	4232583	CPD-12393	CPD-12393 [ C16 H27 N4 O7 S2, tgt=61.77, overall=61.77 ]			(452.93256, 5182.0083)(453.73837, 1966.8918)(433.6163, 755.37994)(454.13858, 19238.934)(454.14297, 7933.817)(455.14563, 1600.67)(456.42194, 548.5485)(435.23154, 695436.94)(436.1317, 184934.23)(437.13205, 88202.08)(472.07153, 25064.096)(471.83444, 8217.703)(472.16708, 859.75604)(473.83057, 22517.484)(474.8308, 8306.699)(475.168, 2691.46)(453.4197, 3581.4521)(456.1588, 12723.79)(476.6678, 2802.6409…	14.5612
CPD-12392	1664850	1634330	2044310	1788209	1518894	1364335	1279261	1284577	1822674	1	1	1000662	557750	3293610	1386992	657992	1865234	1686095	5297022	1465992	1419221	1033396	2361716	1630642	785176	2648294	1671298	1186870	1484714	1268799	991731	4964590	CPD-12392	CPD-12392 [ C6 H13 N O2 S, tgt=98.67, overall=98.67 ]			(168.0656, 5183.94)(146.25632, 2730.092)(164.07387, 80836.54)(165.07718, 5525.869)(166.0709, 3444.65)(167.0744, 482.3)(147.99373, 20810.96)(149.064, 1256.1873)(183.09808, 354.44168)(166.08801, 1390.2426)(189.0533, 1076.0056)(169.54605, 10595.335)(169.052, 3241.9)(170.0462, 2225.08)	1.22128
CPD-12391	10125843	7699166	34000744	8859512	8235244	23174212	29168960	19061038	15096938	4899198	2519748	5246245	3553056	1332410	6818627	14686671	1	2321166	5114625	6223949	1054228	1020979	5520995	3102675	2115396	1795466	2849752	1432330	1	2502334	1423670	3427543	CPD-12391	CPD-12391 [ C10 H19 N3 O4 S2, tgt=77.61, overall=77.61 ]			(309.08026, 35834.34)(310.08356, 4357.264)(311.08392, 361.0456)(293.25552, 16126.656)(294.4952, 4163.0986)(295.4939, 5379.296)(296.26596, 12175.665)(297.07007, 1356.1633)(314.73898, 3000.9263)(312.09036, 3756.593)(293.08395, 8823.835)(331.5727, 937.33)(332.11383, 306.23502)(313.56512, 438.9254)(313.60693, 98.024994)(333.03824, 32604.75)(335.075, 21309.965)(315.8501, 2888.1733)(319.059, 2312.93)	4.78531
CPD-6981	2687800	1	4178240	3491511	2093605	2875966	4594050	1980190	2410851	1	1	3626337	2779549	1	80350000	97576792	1	2279523	2408519	3234621	104726504	111489128	2788404	145927840	136121936	136403792	1	1	124261688	92927912	104720136	77587408	CPD-6981	CPD-6981 [ C18 H15 O8, tgt=80.61, overall=80.61 ]			(359.07648, 35557.246)(360.08032, 8260.712)(341.066, 11261.288)(342.06998, 3381.6128)(343.0728, 1022.38)(365.09183, 2961.3682)(343.08176, 10855.0)(377.4476, 192976.33)(378.11633, 25786.688)(379.11884, 2696.4102)(361.50583, 4049.6)(362.10638, 4018.945)(382.0618, 900.946)(367.0639, 151.15)	18.2038
CPD-12390	3087951	5428227	2968233	2081451	4123035	3004849	4248816	2482654	6848787	30659686	1	1	3264792	2431269	2121516	2852961	1071101	1322327	3119870	3613924	3936237	2668017	5304841	3407778	2502115	7113784	1864302	4966441	2262281	3331084	4768052	3572713	CPD-12390	CPD-12390 [ C15 H25 N4 O7 S2, tgt=60.73, overall=60.73 ]			(441.11826, 593.208)(443.1123, 253.22)(420.10742, 6051.455)(421.60275, 1020.355)(441.74088, 1136.4554)(443.1175, 1183.01)(421.4507, 14473.597)(422.11432, 2372.34)(457.54544, 38780.453)(458.7125, 15468.809)(459.36984, 9434.441)(459.81876, 13258.5)(439.58478, 6334.691)(438.1391, 805.39795)(465.1027, 37601.582)(466.1069, 9522.961)(444.69687, 1567.5039)(446.59528, 8714.194)(447.59393, 28510.545)(448.…	13.9351
ADIPATE	7189117	16860830	9054847	13884020	12635841	13085331	11155277	12893909	12853969	15145246	11647473	11918018	1	5084983	9075385	11711155	27870908	4172906	1	10350491	92534256	7149701	51407368	12271636	97439048	53303840	1	12444088	1	82508160	1	10290223	ADIPATE	ADIPATE [ C6 H8 O4, tgt=72.14, overall=72.14 ]			(145.89427, 2526.0696)(127.964035, 8319.354)(128.04716, 639.6392)(163.46307, 8588.48)(144.06381, 21941.672)(145.48418, 1097.7738)(146.0604, 453.122)(167.03392, 6796.0166)(168.0376, 1993.54)(149.88315, 75031.88)(151.0287, 1586.13)	19.1504
CPD-4602	8285224	7555448	11254066	15022929	13128898	11737413	7400661	6479702	5237289	2233615	3288707	8734860	8453218	8155230	11398615	8223708	1	5465401	6340770	19527276	7246154	9445564	10247178	9437601	7641443	8778018	13514721	11465553	8680630	15802147	12305037	20578664	CPD-4602	CPD-4602 [ C16 H23 N5 O5, tgt=77.04, overall=77.04 ]			(366.50305, 8223.738)(347.3428, 3627.7705)(348.73343, 7530.57)(366.17688, 268422.62)(367.2191, 54576.69)(368.18384, 11270.686)(369.1843, 415.525)(352.17688, 28592.385)(353.17813, 7445.6714)(386.52005, 7425.5996)(386.4607, 5052.981)(387.21323, 9972.878)(369.00345, 8760.746)(369.6165, 12377.8125)(370.2061, 5151.99)(388.16055, 73578.21)(390.061, 1973.9866)(390.169, 249.305)(373.2142, 5220.787)(372.5…	13.7779
CPDQT-350	3552689	651979	6088667	857798	1	2233710	2253923	925668	1	848305	733883	3767514	2016494	6916073	1	1	66579180	1354321	1	4125906	6808090	2777850	5998437	1	1118170	5789291	5591463	5541785	5613760	1	1	1350777	CPDQT-350	CPDQT-350 [ C9 H19 N O S, tgt=61.38, overall=61.38 ]			(193.95152, 15736.261)(194.1185, 15158.48)(174.6716, 5648.9463)(174.1051, 2087.2)(175.1085, 397725.25)(190.21602, 73638.43)(192.1236, 2347.881)(174.11212, 8568.127)(175.11525, 3755966.5)(176.116, 665735.1)(177.1165, 67026.96)(208.15404, 37517.945)(209.92787, 9845.168)(210.1492, 5456.23)(190.14397, 1029434.75)(192.1388, 13506.26)(213.83267, 21252.422)(216.1109, 27431.29)(196.01106, 15058.907)(196.…	18.6257
CPD-4603	8285224	7555448	11254066	15022929	13128898	11737413	7400661	6479702	5237289	2233615	3288707	8734860	8453218	8155230	11398615	8223708	1	1	1	1	7246154	9445564	10247178	9437601	7641443	8778018	13514721	11465553	8680630	15802147	12305037	20578664	CPD-4603	CPD-4603 [ C16 H23 N5 O5, tgt=77.04, overall=77.04 ]			(365.96854, 9669.524)(347.3515, 3631.8665)(348.73343, 7530.57)(366.1768, 266925.4)(367.1805, 53498.855)(368.1839, 10625.595)(369.1839, 307.11)(352.17694, 29392.717)(353.17822, 7601.5034)(386.3947, 7063.3867)(386.4607, 5052.981)(387.21323, 9972.878)(369.12982, 9037.089)(369.74573, 13405.176)(370.2061, 5151.99)(388.1606, 69304.45)(390.11346, 1715.9904)(390.171, 230.21)(373.37012, 4836.669)(372.7551…	13.6005
CPD-8162	2712258	794141	3850234	2348497	2209557	12889835	510977824	413482240	223594736	441912352	488040736	382469504	2056247	186479184	562897860	301824928	143128928	402325792	407875008	250562480	251797008	501556448	255796992	177276496	63351532	275504064	205796608	326299392	158191216	200333040	341193824	271667104	CPD-8162	CPD-8162 [ C49 H86 O15, tgt=98.93, overall=98.93 ]			(915.1617, 13103.272)(916.8711, 10516.8545)(919.2788, 8304.146)(896.9257, 32134.783)(897.8637, 15609.005)(900.1, 20818.48)(916.0698, 13216.876)(916.7805, 12575.013)(917.606, 6920.8413)(918.6307, 539.36)(897.8536, 14012.697)(899.27875, 8914.12)(900.6123, 658.68)(904.6246, 357.17)(933.0069, 914855.2)(934.0013, 533507.56)(935.01825, 210980.4)(935.67816, 68765.28)(936.6396, 20663.502)(917.72424, 2780…	29.0142
CPD-8160	320898	572463	2550434	3743718	1293785	1274313	14437970	19506866	17590024	20897292	8160590	4945850	19648904	21733212	8709344	10472119	6725895	22156230	8754306	9982185	4764511	4726209	1	12387598	352100	4839496	6817596	2077052	7238353	1820181	12688846	5161668	CPD-8160	CPD-8160 [ C49 H90 O15, tgt=47.51, overall=47.51 ]			(920.19855, 7115.911)(920.0568, 4727.8945)(921.6353, 1193.71)(924.6449, 126.18)(900.9986, 3307.7505)(902.6212, 654.75)(903.6216, 271.22)(923.8083, 5679.483)(924.1426, 6411.645)(923.6436, 875.08)(902.9124, 7498.2227)(904.6377, 8547.22)(903.64136, 3698.3198)(904.6247, 250.98)(937.15594, 14114.225)(937.9935, 6805.643)(939.0921, 1763.0442)(940.6776, 45.11)(920.023, 2484.8044)(919.6633, 2573.6572)(920…	28.0446
DEACETYLISOIPECOSIDE	10360485	9134280	17737318	15105325	19457206	12829996	7413270	9743740	3653625	6428142	3992661	10214702	5856589	17239962	23502070	9906479	1	1	1	1	2617342	5015845	5856602	10046132	11948346	7989380	3880316	7509082	4892050	3956810	1912536	5832759	DEACETYLISOIPECOSIDE	DEACETYLISOIPECOSIDE [ C25 H34 N O11, tgt=73.40, overall=73.40 ]			(524.94574, 10560.203)(526.52576, 6628.779)(528.2169, 4517.115)(507.29593, 121480.35)(507.58228, 38537.73)(508.38773, 17425.408)(510.21588, 6162.9746)(528.10223, 120072.516)(529.3457, 59904.42)(528.98584, 32001.496)(529.236, 8099.647)(531.2383, 903.88)(509.78668, 6352.196)(510.55103, 4110.69)(511.5538, 3045.47)(512.2217, 1336.77)(543.82837, 10350.277)(544.559, 3651.2556)(545.2479, 2219.045)(526.0…	11.3441
DIMETHYLSULFONIOACETATE	1912246	987187	2405297	1319712	751471	1249003	2547258	1956234	1590410	1660281	1053515	1022353	1	2022979	1350278	658602	1253568	872445	856717	2102634	816845	2529655	1161747	1203456	1	1	1291897	1441815	956734	2149272	6871625	2387940	DIMETHYLSULFONIOACETATE	DIMETHYLSULFONIOACETATE [ C4 H8 O2 S, tgt=46.97, overall=46.97 ]			(121.02829, 23825.623)(122.03605, 10516.695)(105.01795, 7088.1226)(138.72324, 3602.4766)(139.0494, 132.25)(121.050865, 168061.45)(123.04648, 12051.307)(145.87479, 14048.221)(146.01294, 7391.27)	13.6258
CPD-8165	4933106	4110618	2657284	2085747	2890472	79304288	806111680	1	684706940	967544830	704570750	264912368	1	10029572	797053760	942602050	1101696	52202904	1529511550	922819780	1	288984320	1222000510	746396740	1149217280	178279648	313632896	847275520	437221856	285878240	1020779710	53876544	CPD-8165	CPD-8165 [ C45 H78 O10, tgt=96.76, overall=96.76 ]			(781.81824, 659813.4)(783.7383, 434236.84)(784.5805, 269810.78)(764.93976, 33465.938)(765.5621, 40504.79)(782.79846, 2477529.8)(783.8015, 1233534.1)(784.63226, 1271902.8)(785.58624, 537735.5)(764.5736, 3862.9749)(797.4081, 190485.12)(798.4287, 79412.29)(800.00696, 43803.66)(800.6072, 21261.525)(781.3945, 2830.23)(781.59454, 4574.87)(782.59766, 12258.35)(783.6029, 6319.58)(802.18823, 63532.676)(80…	28.0332
CPD-8163	2286576	1188782	1	6549477	3272305	424890	1	26197474	25930888	56473644	57148416	59394744	55435552	36079964	17853292	965600	18996316	16883128	41215692	1	16552851	23776954	1	9597607	3266400	35406672	10623188	4211696	3593889	2326163	908966	2829970	CPD-8163	CPD-8163 [ C49H88O15, tgt= ]			(917.4491, 21105.13)(917.70886, 13539.666)(898.6783, 16971.02)(899.6791, 9540.109)(900.8923, 3947.7986)(919.2896, 5602.1665)(901.27734, 5057.1865)(934.954, 124304.47)(935.9963, 73163.36)(936.99994, 32329.373)(937.6531, 14403.074)(938.6659, 159.03)(918.3738, 4123.956)(919.0006, 4656.3345)(920.6398, 2542.3677)(920.6421, 6769.56)(921.6387, 834.26)(940.4173, 46810.773)(941.7655, 35227.473)(942.73376,…	28.2744
CPD-4609	2344605	2696571	2406369	1977684	1962259	2068026	2227242	1775032	2782140	1703188	2915354	2826014	2989911	3474972	2676136	2324541	1	3704546	4443681	3034892	1524532	3341878	3802253	3044989	3476323	4380842	3583470	1739820	5037844	3291424	2621027	420953	CPD-4609	CPD-4609 [ C10 H9 N5 O, tgt=85.15, overall=85.15 ]			(216.98862, 6793.8335)(218.0852, 3497.0027)(199.37521, 1340.0219)(200.24304, 2699.4382)(201.0798, 990.08)(216.08803, 2244.8862)(199.29436, 2464.714)(201.75208, 2627.2468)(236.299, 643.1904)(238.12462, 1354.2446)(215.26541, 54420.184)(242.53354, 26727.332)(241.57785, 23831.475)(241.0802, 5735.11)(221.0606, 56894.45)(222.0668, 18392.5)	5.03775
CPD-8164	2712258	794141	3850234	2348497	1	12889835	510977824	413482240	223594736	441912352	488040736	382469504	2056247	186479184	562897860	301824928	143128928	402325792	407875008	250562480	251797008	501556448	1	1	1	1	1	1	158191216	200333040	341193824	271667104	CPD-8164	CPD-8164 [ C49 H86 O15, tgt=98.93, overall=98.93 ]			(915.2422, 14615.962)(916.89923, 11126.786)(919.2788, 8304.146)(897.04285, 32577.418)(897.9634, 16008.844)(900.1, 20818.48)(916.09955, 16438.78)(916.5972, 16168.584)(917.606, 6920.8413)(918.6307, 539.36)(897.8536, 14012.697)(899.27875, 8914.12)(900.6123, 658.68)(904.6246, 357.17)(933.1118, 871038.3)(934.0933, 496049.4)(935.11743, 195748.34)(935.68945, 65753.95)(936.63824, 18866.223)(917.98303, 27…	29.0288
CPD-4608	5587513	14908844	942375	7852903	8423739	1415638	13423734	5799361	11595466	9764324	1	5334704	1	908749	1	21094034	6015772	5165971	16615089	8344854	5401404	6013254	1	8214752	1	1	1	1864085	2228965	1539174	6206132	13350746	CPD-4608	CPD-4608 [ C18 H21 N5 O5, tgt=56.99, overall=56.99 ]			(388.49405, 193330.84)(389.16455, 50589.332)(392.16287, 1058.6766)(371.14905, 8459.165)(372.15363, 1089.9225)(388.73386, 53779.242)(389.1687, 11892.445)(390.17432, 1953.4451)(372.04526, 3813.307)(372.1547, 1596.36)(375.1659, 24683.49)(407.42517, 49824.06)(409.19913, 105414.06)(388.57156, 374355.3)(388.18503, 131454.81)(389.1881, 33101.61)(390.1892, 2442.31)(412.57144, 3001.846)(414.87283, 10241.3…	17.3926
BISOHMYR-GLUCOSAMINYL-1P	8849931	4320130	3541620	3527909	9343096	4127157	4097543	3707196	4032177	10837416	4734259	2922518	5394452	3981620	6490507	9852327	9122045	9883586	5147687	3255270	15944555	1748775	8862696	1	2327606	1979583	1426747	2813109	3124381	1	1	2197307	BISOHMYR-GLUCOSAMINYL-1P	BISOHMYR-GLUCOSAMINYL-1P [ C34 H64 N O12 P, tgt=65.93, overall=65.93 ]			(713.1164, 1463.6062)(713.1814, 659.35254)(712.427, 89.72)(691.3987, 11232.226)(692.4115, 16107.04)(713.33496, 5365.821)(712.8327, 3926.972)(714.4384, 3087.7)(694.49335, 17002.59)(695.4988, 5970.2476)(696.4295, 5512.4395)(697.4339, 2409.056)(727.84656, 10598.343)(729.5508, 10258.963)(730.4614, 2481.0012)(731.45966, 393.78333)(709.47266, 7219.8667)(711.4441, 780.82)(732.7219, 1695.4974)(733.65216,…	19.0931
PROPIONYL_ADENYLATE	1781118	481386	2468119	1113223	3539936	1053159	292445	889568	661677	365200	373370	841376	2060907	1005812	623342	3061364	359082	593806	852571	1879156	1386288	1831125	819888	2536406	1791473	1533966	1819411	2093305	1399576	2058261	2103369	341095	PROPIONYL_ADENYLATE	PROPIONYL_ADENYLATE [ C13 H17 N5 O8 P, tgt=50.68, overall=50.68 ]			(406.00195, 4468.3433)(407.098, 7854.2095)(406.9645, 8124.99)(408.1017, 1214.4331)(386.58267, 5599.875)(389.0896, 142.33)(421.2708, 17139.889)(422.11423, 2740.5217)(423.12622, 531.09)(404.96725, 3683.2473)(404.4423, 1957.16)(404.1034, 1297.97)(426.07758, 3492.655)(426.0684, 326.5)(427.0563, 182.43)(407.05527, 1030.7032)	13.1605
CPD-12388	41602584	63060936	15718016	63324868	16010831	84541200	17657700	13266413	13931810	10111937	2911745	5851962	7722371	3628815	7386810	3554495	10444514	3894917	1	14727611	3512842	3017585	3897017	4271107	1	3414695	3654318	2336683	3330847	3215931	2613886	6585101	CPD-12388	CPD-12388 [ C15 H18 N4 O4 S, tgt=86.87, overall=86.87 ]			(351.10648, 334247.72)(352.1085, 76434.35)(353.1051, 50409.65)(354.10968, 8867.725)(333.67856, 3130.3857)(335.426, 15490.158)(337.09912, 3345.29)(354.199, 3780.9011)(335.4529, 72510.336)(336.4379, 21079.906)(335.10635, 6301.8857)(372.45276, 2404.7463)(371.47397, 2180.4934)(351.1293, 120330.74)(352.13702, 6178.143)(376.86346, 5434.3384)(378.10175, 29166.285)(379.1012, 8653.24)(358.74197, 28268.58)…	11.1385
CPD-4610	6465499	5953098	7624812	6623796	7412998	6190426	9124446	8611552	5714042	3236762	4769217	5902181	7849910	6043050	8627122	5497019	1	4047713	6208861	6237364	1	3516081	4590310	4868318	4516424	1	4821436	4071735	4262709	5620915	4227197	7356733	CPD-4610	CPD-4610 [ C16 H19 N5 O6, tgt=87.66, overall=87.66 ]			(379.34064, 2282.294)(380.1382, 109.45)(359.34537, 1087.2445)(378.68198, 5792.144)(379.3916, 2909.9976)(380.143, 199.99)(360.12976, 97824.32)(361.13586, 19989.062)(362.14108, 8788.568)(363.14, 332.72)(396.81277, 15309.58)(397.16708, 114723.9)(398.17114, 21718.662)(400.18085, 2072.98)(379.45938, 7571.4995)(379.157, 37142.355)(380.16483, 7174.368)(381.1634, 1211.2638)(382.1714, 3981.35)(400.12427, …	9.3815
CPD-13420	1303599	1	1406685	1624454	2278197	1471034	1708953	1899397	1476231	1682777	622035	1309629	1	1370747	1509536	1361579	1	1	1116168	1741477	1	1297550	4141352	1708413	7437199	3102139	6734737	1190161	571789	2091691	3868222	2349069	CPD-13420	CPD-13420 [ C18 H28 N O5, tgt=75.05, overall=75.05 ]			(338.34665, 7608.257)(339.40878, 2910.5618)(341.4542, 1186.13)(342.70837, 2677.6848)(323.0768, 9890.62)(324.04364, 7065.942)(324.9745, 9911.122)(340.8088, 8369.835)(341.75708, 9691.565)(342.2097, 5348.86)(323.35315, 8539.36)(323.86707, 7664.1426)(324.79996, 8725.838)(325.2011, 9508.46)(358.13367, 10571.225)(357.23056, 4367.6987)(342.39932, 30225.459)(362.01266, 30950.492)(362.76492, 6911.888)(343…	19.5642
CPD-6998	1160261	1266502	1697972	1519904	1	1	1768359	1439366	1262409	1	807727	967712	1	786939	1036785	958661	22281552	1427792	1	1770904	4504779	8609269	6425894	7378617	5643871	3814529	4522387	1	8253211	6046136	5641643	7586214	CPD-6998	CPD-6998 [ C15 H10 O5, tgt=98.54, overall=98.54 ]			(270.05417, 748.11426)(271.0606, 217481.84)(272.06378, 36200.86)(273.06644, 4685.0703)(274.0695, 833.06665)(288.6662, 5629.887)(275.08905, 338.2383)(295.7195, 1472.5599)	18.7778
CPD-12385	9674592	8086868	8776947	10633712	1	12144554	15004653	12926861	12601800	2191499	4241779	1	1	1	1	1	1923710	1	1	1	1	290376	1	1372145	460602	1	323841	794000	385927	1	1	1	CPD-12385	CPD-12385 [ C13 H17 N3 O4 S, tgt=48.40, overall=48.40 ]			(313.50894, 7435.0083)(314.53983, 3499.3535)(316.10095, 1869.215)(293.63077, 11885.195)(294.0952, 989.06)(316.38922, 1783.6085)(316.7712, 923.77997)(317.1038, 3733.76)(299.0927, 868.01776)(300.0977, 776.55)(330.29272, 23958.135)(331.87613, 80211.46)(312.41113, 5991.796)(314.45255, 2887.0315)(316.1219, 720.17)(336.2678, 5122.5337)(337.58466, 658.3712)(337.75046, 213.15668)(317.8763, 8931.015)(319.…	11.5628
CPD-12384	1341181	3756170	1710907	1646179	5517200	1425438	5687407	5611861	4162975	1	1	1	1546197	1	3834927	1203406	1754668	1314027	1756323	1726447	1	2506127	1976378	2257879	20963128	718438	3429173	46193220	1390378	1	1	1277414	CPD-12384	CPD-12384 [ C18 H23 N4 O7 S, tgt=54.39, overall=54.39 ]			(441.6278, 8964.7295)(442.79996, 4745.5967)(423.8682, 3776.0276)(423.6184, 1227.885)(426.1217, 1675.02)(427.1256, 106.72)(442.4168, 15792.582)(441.1351, 8558.741)(442.1393, 1987.9984)(424.45972, 457.06998)(425.795, 412.7333)(426.1241, 843.19)(459.76196, 959.97595)(460.1659, 244.73665)(441.9364, 5992.9116)(441.93646, 1428.5577)(444.15366, 796.63)(463.25525, 2761.237)(464.12076, 3000.0818)(465.2292…	12.5597
CPD-12387	7506574	6913563	6853129	6224411	6007655	4279796	4914270	6496348	6914414	1369518	6409682	3911393	5007743	2757281	4572030	5430971	1	2500223	4568265	6376058	1369384	1882220	2976309	3172587	2197127	3710925	2841230	2036095	1373514	1663813	3516452	4182189	CPD-12387	CPD-12387 [ C20 H24 N5 O7 S, tgt=78.18, overall=78.18 ]			(478.59976, 10689.971)(460.3119, 7885.552)(462.13168, 2608.704)(464.4691, 4811.8)(465.63904, 5945.375)(466.1413, 2118.84)(483.96262, 385.07373)(485.0571, 516.2846)(485.148, 414.17)(464.52957, 14123.233)(465.67578, 4943.762)(466.6651, 1458.7363)(466.1435, 1189.02)(499.44528, 1680.9481)(478.15955, 602.2967)(504.166, 1757.2919)(505.0566, 5773.2456)(505.91647, 2436.243)(506.1354, 1214.3059)(487.1211,…	15.6209
GLC	6617736	1	7646713	4575640	1	1	7788492	1	4526879	1	1	1	1	1	1	1	1	2034955	1	1	2772236	1	1	3952848	1771234	1	1	1	3422180	1	1	1	GLC	GLC [ C6 H12 O6, tgt=86.73, overall=86.73 ]			(181.064, 1224.79)(162.95358, 2995.815)(164.56136, 1238.48)(166.06793, 5906.865)(168.0741, 217.02)(201.10397, 190662.42)(203.1061, 15261.43)(180.0866, 197905.39)(181.08939, 17316.023)(182.0812, 248.4)(185.04446, 3513.4976)	14.672
CPD-12381	1165082	917287	1	1408097	1129284	1310583	1184822	1252312	1	567464	918137	1	1103561	4272436	1232071	836323	1	818818	924428	1	1131524	1	1	4786778	1	5212370	5215997	4620232	3354845	1	1	5092080	CPD-12381	CPD-12381 [ C10 H13 N5 O5, tgt=92.05, overall=92.05 ]			(270.0902, 596.68)(284.0984, 87532.39)(285.10254, 9654.404)(286.10376, 398.28247)(266.08884, 8350.451)(267.08798, 1781.64)(268.09335, 552.145)(304.83224, 2122.5671)(304.63495, 1452.155)(286.89566, 2558.5347)(287.76593, 4126.31)(288.12234, 5861.356)(307.0876, 100.82)	18.6126
CPD-6994	14904765	16410522	18406350	2683681	9823411	1865170	10644135	2548657	2440216	10015648	11676896	1	1302828	1181221	8925562	8078836	19979328	1634042	8276062	17296866	3174237	5585369	38615568	33631440	3706850	44077412	1912706	5968629	26211234	32708928	29995014	35379728	CPD-6994	CPD-6994 [ C15 H11 O6, tgt=98.08, overall=98.08 ]			(287.05576, 551714.7)(288.05875, 89627.43)(289.062, 12205.301)(290.06522, 783.87836)(274.0639, 180.92)(308.4082, 2488.05)(309.09857, 4698.8384)(310.098, 805.03)(289.3371, 5230.368)(290.58527, 1860.0)(313.05243, 21224.143)(314.05557, 3867.085)(315.0577, 1108.6443)(295.046, 244.98)	14.8372
CPD-4617	59427396	65406040	61054720	66587972	79860192	80693472	98527080	91293472	77497632	26818296	18629020	77600944	82726144	68667104	91403136	58273760	60729960	1	61311764	76238688	8232186	1	1	1	1	1	1	1	1	1	1	1	CPD-4617	CPD-4617 [ C16 H25 N5 O6, tgt=99.01, overall=99.01 ]			(383.17877, 13043.447)(365.27423, 45064.72)(384.1874, 3044955.5)(385.19043, 523506.25)(386.19305, 104296.79)(387.19818, 13293.558)(366.17636, 251311.31)(367.17764, 15319.71)(368.17227, 21079.385)(403.02145, 10262.2705)(405.22342, 6369.614)(387.26166, 18719.082)(387.2145, 11811.75)(406.41745, 1828.55)(388.16058, 20656.951)	13.0801
CPD-6995	1226877	7741229	1359490	3631110	4254144	3962838	3630452	3040121	3940478	5869168	1	5205829	7114223	10094042	5263368	5354356	2770502	3318197	3523034	1765363	4506083	4132170	2241035	3350756	3536469	5460618	1	3778768	2900408	4332250	9362438	4325519	CPD-6995	CPD-6995 [ C4 H10 O4, tgt=78.79, overall=78.79 ]			(126.06733, 35397.992)(105.59519, 600.7328)(106.0498, 1207.87)(124.89153, 90226.31)(126.0717, 18607.78)(106.83664, 6379.371)(110.06705, 3272.645)(143.9863, 68541.71)(144.67407, 164814.84)(145.1025, 39600.297)(124.28617, 7592.8184)(126.09066, 7013.22)(150.05766, 41038.914)(127.07143, 55382.195)(128.041, 2303.4487)(129.04419, 916.66876)	3.33028
CPD-4618	4353113	4016861	5062332	5660021	5518124	5457984	6244220	5478685	4848613	2349600	1	4397018	5058429	4563050	5726763	1	3971926	2287561	3642267	1	2567709	1	4188493	5309424	5027054	3738562	4980445	4184747	4276158	1	1	8010386	CPD-4618	CPD-4618 [ C16 H23 N5 O6, tgt=86.16, overall=86.16 ]			(382.04944, 1759.1853)(383.1052, 7705.0747)(364.00433, 11064.846)(366.47925, 38438.81)(367.72922, 42482.24)(368.16855, 13074.599)(382.45718, 1943.8358)(364.28738, 8677.059)(399.77335, 2416.4885)(383.191, 9445.47)(404.1555, 196854.75)(405.16116, 39978.78)(406.1633, 7301.3)(407.16107, 683.25433)(390.6064, 24947.213)(391.1525, 16798.86)	12.4498
CPD-8168	12686353	29454540	17550558	24986744	55402220	66286432	2287853310	849574590	867490240	3328376830	615408000	377984224	179837984	708072380	765246210	736578300	5817752100	5848080900	6981733900	310672576	625005380	2109884420	3997356	4057842	227123008	990705150	2298899970	278974112	2106474750	217731712	331648448	1	CPD-8168	CPD-8168 [ C45 H74 O10, tgt=99.47, overall=99.47 ]			(774.5997, 33410.19)(776.02966, 37832.55)(777.0298, 13636.963)(778.53894, 31921.24)(779.5425, 15539.13)(780.53784, 25232.47)(759.3973, 30211.65)(757.493, 10155.38)(776.0169, 137327.94)(777.02, 68089.71)(778.104, 236967.55)(781.3032, 637746.1)(760.0247, 120574.41)(758.52545, 115196.055)(759.52747, 36367.516)(792.5624, 6491775.5)(793.5652, 3827959.5)(794.5698, 1381975.0)(795.57404, 380559.84)(796.5…	28.4409
CPD-12383	15709453	23303888	21827640	19555746	20784790	24647260	30117470	27711198	23563612	17319500	10768816	18608410	25975922	20574360	29021684	24825836	12120793	23997088	18543998	21417806	18378318	26469592	1404025	28710548	36982272	25755680	1225256	1386621	27765124	1252222	989642	2031086	CPD-12383	CPD-12383 [ C8 H9 N O2, tgt=99.02, overall=99.02 ]			(154.70746, 5232.8105)(135.98114, 6091.6895)(137.3975, 4471.37)(138.0656, 1525.86)(152.07097, 553310.2)(153.07356, 52316.125)(154.07742, 1449.4299)(134.06075, 15124.928)(135.05806, 1640.26)(169.09691, 14964.159)(170.0974, 1635.63)(171.0949, 176.39)(153.79375, 34901.008)(178.0647, 5208.6)(156.04297, 121.619995)	6.90231
CPD-4615	59427396	65406040	61054720	66587972	79860192	80693472	98527080	91293472	77497632	26818296	18629020	77600944	82726144	68667104	91403136	58273760	60729960	1	61311764	76238688	8232186	1	1	1	1	1	1	1	1	1	1	1	CPD-4615	CPD-4615 [ C16 H25 N5 O6, tgt=99.01, overall=99.01 ]			(383.17877, 13043.447)(365.27423, 45064.72)(384.1874, 3044955.5)(385.19043, 523506.25)(386.19305, 104296.79)(387.19818, 13293.558)(366.17636, 251311.31)(367.17764, 15319.71)(368.17227, 21079.385)(403.02145, 10262.2705)(405.22342, 6369.614)(387.26166, 18719.082)(387.2145, 11811.75)(406.41745, 1828.55)(388.16058, 20656.951)	13.0583
CPD-8167	33310956	25006500	26500100	22593672	881368	39859800	108545168	222430288	676780100	963526400	1455288700	1440669700	1006330050	2409176580	1157672700	1	213755760	153135136	323566	1632869380	431060768	728536060	397071616	43000944	1037520000	725519300	1745524350	1003572930	731873660	1	3417016320	384690528	CPD-8167	CPD-8167 [ C45 H76 O10, tgt=95.77, overall=95.77 ]			(777.00397, 37522.227)(778.5488, 21515.488)(782.5654, 29157.35)(761.3402, 36910.758)(759.5361, 42447.41)(760.52, 6164.66)(778.0729, 386109.94)(780.55194, 613450.44)(781.5598, 4129009.5)(783.069, 2496582.2)(782.5676, 2919938.8)(783.5724, 1205592.9)(764.88837, 54522.375)(765.55164, 36300.508)(795.3544, 765398.44)(795.5774, 330257.47)(796.5837, 162161.8)(797.5919, 68226.79)(776.8694, 5411.344)(778.7…	27.0941
CPD-6997	2308563	3483309	3360652	3508659	2674541	2449515	2026023	1	2161366	2272642	2127544	1	1	1	1036785	958661	22277582	1427792	1	1	4550370	8685164	6438740	7448260	5654308	3774514	4493980	1	8254572	6039914	5674045	1	CPD-6997	CPD-6997 [ C15 H12 O6, tgt=98.04, overall=98.04 ]			(288.05875, 4756.3267)(270.41895, 764.97174)(289.0708, 4698.1357)(290.07645, 339.14502)(271.06058, 232370.05)(272.06375, 38959.355)(273.06747, 5247.3555)(274.06665, 579.122)(307.90216, 1872.972)(288.58893, 9601.933)(290.59268, 1184.4266)(315.14853, 2366.189)(295.7195, 1472.5599)	17.2348
CPD-4616	59427396	65406040	61054720	66587972	79860192	80693472	98527080	91293472	77497632	26818296	18629020	77600944	82726144	68667104	91403136	58273760	60729960	1	61311764	76238688	8232186	64843520	78060784	87065344	88482000	65787236	80714688	70134080	1	85805624	60971056	108408456	CPD-4616	CPD-4616 [ C16 H25 N5 O6, tgt=99.01, overall=99.01 ]			(383.1778, 12151.984)(365.23734, 37169.613)(384.18744, 3184404.2)(385.19046, 550714.9)(386.1929, 109026.93)(387.1982, 14888.468)(366.17636, 242805.67)(367.17764, 15319.71)(368.17227, 21079.385)(403.08707, 10426.839)(404.87433, 5246.6)(405.22067, 4408.725)(387.57785, 23567.285)(387.2145, 11811.75)(406.41745, 1828.55)(388.16064, 21422.117)	12.6858
CPD-4613	4353113	4016861	5062332	5660021	5518124	5457984	6244220	5478685	4848613	2349600	1	4397018	5058429	4563050	5726763	1	3971926	2287561	3642267	1	2567709	2401424	4188493	5309424	5027054	3738562	4980445	4184747	4276158	1	1	8010386	CPD-4613	CPD-4613 [ C16 H23 N5 O6, tgt=86.16, overall=86.16 ]			(382.0542, 1713.1752)(383.1052, 7705.0747)(364.01, 10667.361)(366.41315, 36526.93)(367.63678, 40032.23)(368.0429, 11711.629)(382.45718, 1943.8358)(364.28738, 8677.059)(399.70184, 2426.4724)(383.15106, 9722.245)(404.15546, 190826.02)(405.16098, 38827.45)(406.1633, 7301.3)(407.16107, 683.25433)(390.6064, 24947.213)(391.1525, 16798.86)	12.3754
CPD-6991	2145973	854831	1601177	2256678	887739	2657026	4590177	3452004	3571996	785016	1843760	1944624	2450301	2221798	732603	491542	6711840	612004	2160040	1140927	1540246	1131642	1214275	1094223	1073389	377139	581856	316723	471992	1125091	1385768	1040835	CPD-6991	CPD-6991 [ C15 H11 O4, tgt=59.28, overall=59.28 ]			(259.07785, 555.34)(259.0767, 64.04)(237.05489, 965.3167)(259.08136, 3049.3071)(260.08414, 750.73456)(243.07602, 3151.684)(274.42413, 1883.2625)(275.4373, 1201.385)(276.60406, 168.70999)(257.0949, 1002.96)(283.066, 758.0)(262.77176, 99767.33)(263.76538, 55324.8)(264.15652, 13314.025)	1.76044
CPD-4614	4353113	4016861	5062332	5660021	5518124	5457984	6244220	5478685	4848613	2349600	1	4397018	5058429	4563050	5726763	1	3971926	2287561	3642267	1	2567709	1	4188493	5309424	5027054	3738562	4980445	4184747	4276158	1	1	8010386	CPD-4614	CPD-4614 [ C16 H23 N5 O6, tgt=86.16, overall=86.16 ]			(382.04944, 1759.1853)(383.1052, 7705.0747)(364.00433, 11064.846)(366.47925, 38438.81)(367.72922, 42482.24)(368.16855, 13074.599)(382.45718, 1943.8358)(364.28738, 8677.059)(399.77335, 2416.4885)(383.191, 9445.47)(404.1555, 196854.75)(405.16116, 39978.78)(406.1633, 7301.3)(407.16107, 683.25433)(390.6064, 24947.213)(391.1525, 16798.86)	12.4498
CPD-4611	6465499	1	7624812	6623796	1	1	9124446	8611552	1	3236762	1	1	7849910	1	8627122	1	1	4047713	1	6237364	1	1	1	1	1	1	1	1	4262709	5620915	4227197	7356733	CPD-4611	CPD-4611 [ C16 H19 N5 O6, tgt=87.66, overall=87.66 ]			(379.63907, 1611.825)(380.1382, 109.45)(359.1209, 217.63)(378.6432, 1163.11)(360.1297, 180747.05)(361.13763, 36461.53)(362.14288, 9655.371)(363.14, 332.72)(396.45828, 23556.375)(397.16708, 114723.9)(398.17114, 21718.662)(400.18085, 2072.98)(378.16187, 11215.282)(379.157, 37142.355)(380.16483, 7174.368)(381.1634, 1211.2638)(382.1714, 3981.35)(400.12442, 44327.82)(401.38, 7362.843)(402.13406, 1509.…	9.82919
CPD-6993	4642808	510769	12534428	4539685	3187680	4903014	7953515	8260074	5782125	1151225	2532767	579110	482822	3888404	5973393	2252803	9976213	649590	4872760	19710532	9895649	11602546	12371392	15146398	7004571	3244020	5625921	12461680	10144779	14993644	7086428	26443428	CPD-6993	CPD-6993 [ C15 H12 O4, tgt=85.48, overall=85.48 ]			(256.17456, 3056.2634)(238.89983, 840.605)(257.08142, 246660.66)(258.08505, 39784.633)(259.09113, 12156.263)(260.09607, 831.98)(239.20412, 56553.188)(240.20802, 9550.175)(241.08243, 1576.7511)(275.10873, 18352.07)(276.61502, 8665.223)(277.11484, 1299.4266)(260.10934, 2420.16)	22.0968
CPD-4612	4353113	4016861	5062332	5660021	5518124	5457984	6244220	5478685	4848613	2349600	1	4397018	5058429	4563050	5726763	1	3971926	2287561	3642267	1	2567709	1	4188493	5309424	5027054	3738562	4980445	4184747	4276158	1	1	8010386	CPD-4612	CPD-4612 [ C16 H23 N5 O6, tgt=86.16, overall=86.16 ]			(382.04944, 1759.1853)(383.1052, 7705.0747)(364.00433, 11064.846)(366.47925, 38438.81)(367.72922, 42482.24)(368.16855, 13074.599)(382.45718, 1943.8358)(364.28738, 8677.059)(399.77335, 2416.4885)(383.191, 9445.47)(404.1555, 196854.75)(405.16116, 39978.78)(406.1633, 7301.3)(407.16107, 683.25433)(390.6064, 24947.213)(391.1525, 16798.86)	12.4498
VITEXIN	129958	1	217454	159993	1	157112	133361	1	1	1	1	1	1	1	1	1	1	1	1	1	1	1	1	1	1	1	208687	213374	281924	1	1	1	VITEXIN	VITEXIN [ C21 H19 O10, tgt=59.53, overall=59.53 ]			(431.0973, 645.245)(433.1112, 5444.8135)(434.11545, 871.325)(417.10724, 1313.53)(419.1139, 623.85)(431.11646, 280.58002)(456.5227, 2064.1287)(460.10855, 2781.915)(441.08545, 2149.55)	18.0764
CPD-11281	1	135646	158174	143458	1	116995	111335	171068	115979	401951	1	125656	111511	1	1	1	1074596	1	760665	1	1	1	1	1	1	1	1	1	1	1	1	1	CPD-11281	CPD-11281 [ C10 H16 N3 O6 S2, tgt=47.52, overall=47.52 ]			(338.0525, 4406.39)(339.0575, 331.83)(340.0475, 304.65)(320.0416, 2490.22)(339.55762, 571.485)(323.7129, 33104.145)(324.0484, 41225.26)(326.0455, 3819.92)(356.28156, 5704.833)(360.0829, 1410.86)(362.0839, 164.14)(338.9663, 1809.1266)(363.03275, 1189.44)(345.0236, 368.08)	14.8095
CPD-4661	25844952	26266016	30920322	20016644	27314748	24448788	30624216	27683576	46812064	1	12046366	1	29384886	41405764	41556240	32063640	15634630	35376964	40514324	30806772	29930356	16654240	30343392	34702232	1	19976240	28996184	29638166	25936800	1	24181168	21307036	CPD-4661	CPD-4661 [ C15 H24 O2, tgt=86.21, overall=86.21 ]			(237.18137, 6112.803)(238.18274, 756.48)(219.17056, 62945.676)(237.183, 4816.36)(219.17134, 51247.68)(259.52753, 10488.753)(241.15608, 303288.78)(242.15894, 44793.086)	2.65984
CPD-11287	9323495	4587223	5003308	10782565	4335331	7585968	7753167	3260903	2506882	2209433	1832351	4836956	2451730	2613784	3547822	1097129	2934454	2062234	1026302	6466103	2250775	3506695	9031944	4864160	3767170	3092113	6429501	7232094	6024880	3056148	3117232	4047815	CPD-11287	CPD-11287 [ C15 H24, tgt=98.14, overall=98.14 ]			(205.19533, 186569.53)(206.19844, 32968.17)(207.20204, 2186.9683)(222.22198, 1378.9202)(227.17587, 17514.283)(228.1703, 4281.22)	26.6488
CPD-4664	9323495	4587223	5003308	10782565	4335331	7585968	7753167	3260903	2506882	2209433	1832351	4836956	2451730	2613784	3547822	1097129	2934454	2062234	1026302	6466103	2250775	3506695	9031944	4864160	3767170	3092113	6429501	7232094	6024880	3056148	3117232	4047815	CPD-4664	CPD-4664 [ C15 H24, tgt=98.14, overall=98.14 ]			(205.19533, 186569.53)(206.19844, 32968.17)(207.20204, 2186.9683)(222.22198, 1378.9202)(227.17587, 17514.283)(228.1703, 4281.22)	26.6488
CPD-4663	16727901	15373864	23966180	21796556	22672864	21537620	22693304	23676280	21184450	7757200	11013405	23740264	15995328	16969968	28708946	23253192	11588398	15652300	17934980	20827072	25236882	24523698	17102504	24008108	13791003	10462497	22233816	11852431	13158029	16220161	11686559	10003711	CPD-4663	CPD-4663 [ C15 H24 O, tgt=98.33, overall=98.33 ]			(221.19035, 279821.0)(222.1936, 48351.13)(223.20018, 6813.344)(224.2008, 475.04)(203.1797, 716225.8)(204.18233, 105914.484)(205.18742, 9293.481)(206.18999, 323.285)(238.2178, 728.2845)(243.1706, 315221.6)(244.17326, 78042.914)(228.17006, 43508.137)	22.5838
CPD-4662	16727901	15373864	23966180	21796556	22672864	21537620	22693304	23676280	21184450	7757200	11013405	23740264	15995328	16969968	28708946	23253192	11588398	15652300	17934980	20827072	25236882	24523698	17102504	24008108	13791003	10462497	22233816	11852431	13158029	16220161	11686559	10003711	CPD-4662	CPD-4662 [ C15 H24 O, tgt=98.33, overall=98.33 ]			(221.19035, 279821.0)(222.1936, 48351.13)(223.20018, 6813.344)(224.2008, 475.04)(203.1797, 716225.8)(204.18233, 105914.484)(205.18742, 9293.481)(206.18999, 323.285)(238.2178, 728.2845)(243.1706, 315221.6)(244.17326, 78042.914)(228.17006, 43508.137)	22.5838
L-AZASERINE	286096	1	246423	776961	1	462772	207934	194407	1	1	1	1	189483	1	247010	1	1	1	1	364348	202437	156843	1	1	1	1846290	599832	1	295355	1	1	1	L-AZASERINE	L-AZASERINE [ C5 H8 N3 O4, tgt=75.44, overall=75.44 ]			(176.72252, 18498.975)(178.05931, 2160.4277)(156.0424, 13176.48)(157.0459, 735.71)(158.039, 861.29)(177.61989, 2600.761)(159.91096, 3323.0825)(161.0585, 7570.1)(193.2538, 67266.04)(194.59122, 12306.336)(196.09444, 1055.7067)(174.36185, 16689.621)(179.08319, 3892.5151)(198.84537, 3717.2383)(200.04935, 372.29)(180.03185, 302.19)	11.4975
CPD-14516	2252242	992088	8444448	1247112	384859	9089298	8974219	371968	10345391	3920984	290888	2699019	9593281	1	9118752	10516402	911815	5649361	1135595	2473664	7048115	10143873	2922032	6687026	9526978	8027522	5882477	4695537	4771866	6004874	8091050	3543892	CPD-14516	CPD-14516 [ C8 H15 N O, tgt=79.22, overall=79.22 ]			(143.11961, 5171.8037)(125.1093, 9149.86)(142.12286, 79487.734)(143.12354, 12199.91)(124.11253, 28595.867)(125.10663, 8344.373)(168.11546, 6582.0664)(146.47961, 116336.71)(147.09514, 6095.559)	9.15497
3-METHYLXANTHINE	15433016	18780182	16773294	12251495	19039416	11581220	16277716	12450339	18019024	9028274	10341108	17923140	9106540	17413512	16314700	12298402	22309922	1	13216748	14079065	4930879	1	2809838	4918633	1	1	1	1	9168196	1	11124690	1	3-METHYLXANTHINE	3-METHYLXANTHINE [ C6 H6 N4 O2, tgt=78.16, overall=78.16 ]			(167.92697, 2632.5752)(169.68166, 1366.0413)(170.64795, 490.3317)(149.0473, 1501.14)(188.22894, 12479.306)(166.07274, 113233.94)(167.07619, 11398.931)(189.17625, 5324.362)(190.04297, 560.7475)(173.32503, 2605.97)(175.9274, 1006.1267)	2.63919
CPD-3944	8697806	8524306	10760594	11662851	8717124	9075345	10614698	10705874	10824173	5112089	6207217	1	1	1	1	1	1	1	1	1	11611483	13295303	14981318	19744252	13920401	15946226	13717184	1	15813175	30325800	10799774	11420353	CPD-3944	CPD-3944 [ C17 H14 O6, tgt=98.38, overall=98.38 ]			(314.07904, 228321.98)(315.08304, 46868.44)(316.08566, 6891.049)(317.0872, 278.04428)(296.0683, 56120.31)(297.07227, 10688.496)(298.0759, 1201.472)(315.08682, 307478.28)(316.08984, 56991.523)(317.093, 8356.8955)(318.09738, 858.4284)(332.6631, 215746.72)(333.11392, 27307.188)(334.1149, 1579.3087)(317.1141, 191.31)(337.1718, 1162.4)	20.9151
CPD-3946	53437864	53094396	43425112	20894352	32031208	28808772	1	1	1	1	1	1	11916819	12663372	4331458	1787993	1	1	7232237	1	1	1	1	1	1	1	1	1	37408704	50250300	1	1	CPD-3946	CPD-3946 [ C28H48O2, tgt= ]			(417.3672, 3844.932)(420.3739, 1319.09)(398.95834, 1905.614)(417.37036, 4465.263)(418.3735, 552.94)(399.3618, 61836.375)(400.36557, 23037.64)(401.36813, 4249.5015)(402.369, 304.25)(437.00165, 7527.918)(437.4028, 4318.0)(417.39502, 858.9575)(439.8937, 363612.0)(440.3591, 208915.45)(441.36285, 42509.16)(421.34555, 5035.111)(422.34857, 743.75287)	28.052
CPD-3941	4626251	4479621	4640113	4360107	5002057	4753518	2672063	1	1	1	1	22687364	33914088	39967856	25705828	28432804	7918513	11966020	20967192	14742481	25738052	1314295	1	1	1	1	1	1	83894632	1	1	1	CPD-3941	CPD-3941 [ C28 H46 O, tgt=95.17, overall=95.17 ]			(399.23206, 22325.658)(400.3615, 6908.4414)(401.36166, 1079.5975)(381.48947, 4944.7563)(382.35184, 727.08997)(399.36234, 167970.45)(400.61658, 41321.492)(401.36893, 8876.538)(402.36508, 336.77)(382.12302, 3478.458)(382.85587, 560.8975)(418.61844, 9195.733)(421.9085, 1806.745)(399.38705, 2406.1765)(421.45142, 4537.307)(422.80408, 3067.001)(404.5863, 1735.2024)(405.33597, 3020.7068)(407.34125, 6075…	29.4852
CPD-3942	1486585	1116959	1704727	1541203	1019609	1182148	1541054	1305311	1365927	558331	1026374	1318029	1422089	900763	938102	904644	27930476	1522066	915673	2028414	3016306	1	5344303	1	3841332	1	3646854	3770272	1	1	1	1	CPD-3942	CPD-3942 [ C16 H12 O6, tgt=98.23, overall=98.23 ]			(301.07123, 121250.46)(302.07434, 20249.746)(303.0761, 2736.8713)(304.0809, 3262.22)(319.4223, 2871.2544)(304.0975, 1403.77)(323.0532, 1298.45)	18.9745
CPD-3943	53437864	53094396	43425112	20894352	32031208	28808772	13808567	11725060	7198500	5264276	5704852	35063820	11916819	12663372	4331458	1787993	4153786	5034684	7232237	6606904	1	6493882	12055240	38306384	37308504	37828464	38399296	40354384	37408704	50250300	8743177	27612814	CPD-3943	CPD-3943 [ C28 H48 O2, tgt=98.43, overall=98.43 ]			(417.25885, 5997.3623)(417.86594, 4045.7852)(418.37192, 249.74666)(398.85684, 1640.16)(417.7048, 4540.538)(418.94476, 1278.64)(399.36215, 95373.89)(400.36554, 29834.475)(401.36835, 5128.281)(402.3644, 653.98145)(437.1799, 4534.446)(437.90582, 2683.65)(417.393, 790.56)(439.92126, 172994.31)(440.788, 118432.81)(441.80807, 38045.938)(421.34546, 6947.9023)(422.34747, 2028.7863)	27.9242
CPD-14533	6985125	8906208	10263684	14295827	800471490	1763257220	1	2098125440	1	984621	1	1346142720	85325576	2295984900	1568718590	17219742	148636128	127100320	1792612350	2156070400	333294080	1	1	1649136640	877139710	880034620	268434624	1244466820	992249410	490835904	6522384	107398144	CPD-14533	CPD-14533 [ C36H54O4, tgt= ]			(552.32153, 18982.059)(556.4196, 12142.417)(535.73737, 9461.47)(537.1527, 7759.1475)(534.8905, 8399.845)(536.4037, 3090.38)(537.4068, 820.28)(555.2709, 23669.723)(555.7547, 11413.935)(556.02234, 20325.406)(556.08636, 24785.578)(556.43054, 22380.7)(557.4232, 16397.71)(536.3482, 16500.016)(536.9795, 7293.7153)(537.9127, 4924.61)(539.1635, 8280.963)(569.435, 243891.36)(570.44147, 111473.35)(571.7732…	28.8686
M-TOPOLIN	762000	1351640	672798	980001	899191	803054	925066	1133286	745543	413096	277621	951567	1273523	1119213	1122375	1	55427944	533541	1018561	972982	460295	767511	1449072	970534	740612	754913	735203	477238	718493	1246214	1313445	1223105	M-TOPOLIN	M-TOPOLIN [ C12 H13 N5 O, tgt=70.37, overall=70.37 ]			(244.1156, 20393.146)(245.1174, 520735.94)(226.10515, 3705.2148)(227.105, 19711.855)(247.71019, 23292.67)(247.62979, 12428.1)(226.57034, 6717.337)(230.11995, 6916.2153)(263.6503, 39165.645)(265.29935, 25127.852)(265.82584, 21839.512)(243.63493, 36738.07)(268.29956, 2680.6794)(270.0147, 3812.2493)(270.11127, 5393.885)(248.57747, 23493.973)(249.13377, 4174.4644)(250.0893, 799.64)	11.8328
CPD-14529	100338432	14682995	116222304	68598032	19920312	60483136	119408232	105145176	70697032	11214078	19790788	51284704	23570928	31590212	67688104	34957816	95748760	31381064	44342060	1	15215247	23242376	1	1	1	1	1	1	1	1	1	1	CPD-14529	CPD-14529 [ C10 H12 O2, tgt=95.34, overall=95.34 ]			(169.09761, 24698.58)(147.63469, 7025.381)(149.58315, 1070.655)(165.09145, 2687606.0)(166.09427, 318182.25)(167.09898, 45667.484)(147.34685, 10194.231)(148.0827, 1714.685)(182.11853, 22355.473)(164.60867, 2323.7063)(169.1221, 62.63)(187.07533, 13771.176)(172.64458, 6152.8843)	18.8592
CPD-14528	3329292	1	1	3938980	1426525	1	1	3515168	1	1388806	1	3020340	4032362	5209545	3598808	819452	3944973	560905	5385303	4857782	3033286	3969527	1	5297736	1	5151436	1	1	5453976	5626747	4563073	8025321	CPD-14528	CPD-14528 [ C14 H20 O6, tgt=76.22, overall=76.22 ]			(285.1249, 23313.14)(266.11304, 1206.265)(288.142, 230.56)(268.97528, 14260.257)(269.6315, 7863.1113)(303.05798, 7992.821)(304.1657, 9118.455)(287.88495, 14116.642)(289.16205, 3902.982)(309.29614, 1816.3905)(310.6278, 292.29)(293.11716, 34923.656)(294.1212, 4957.34)	11.3442
CPD-10707	9323495	4587223	5003308	10782565	4335331	7585968	7753167	3260903	2506882	2209433	1832351	4836956	2451730	2613784	3547822	1097129	2934454	2062234	1026302	6466103	2250775	3506695	9031944	4864160	3767170	3092113	6429501	7232094	6024880	3056148	3117232	4047815	CPD-10707	CPD-10707 [ C15 H24, tgt=98.14, overall=98.14 ]			(205.19533, 186569.53)(206.19844, 32968.17)(207.20204, 2186.9683)(222.22198, 1378.9202)(227.17587, 17514.283)(228.1703, 4281.22)	26.6488
CPD-10708	9323495	4587223	5003308	10782565	4335331	7585968	7753167	3260903	2506882	2209433	1832351	4836956	2451730	2613784	3547822	1097129	2934454	2062234	1026302	6466103	2250775	3506695	9031944	4864160	3767170	3092113	6429501	7232094	6024880	3056148	3117232	4047815	CPD-10708	CPD-10708 [ C15 H24, tgt=98.14, overall=98.14 ]			(205.19533, 186569.53)(206.19844, 32968.17)(207.20204, 2186.9683)(222.22198, 1378.9202)(227.17587, 17514.283)(228.1703, 4281.22)	26.6488
CPD-3141	581230	4325396	6070485	4712522	3702598	989494	4419305	3661217	4892816	3473334	4385661	297429	4302614	1	5900127	2142056	1	6350395	8723489	4283426	3813888	489379	5610971	5495653	4077144	7363707	4232682	3360940	636621	4853659	1	2959565	CPD-3141	CPD-3141 [ C15 H9 O5, tgt=68.17, overall=68.17 ]			(273.0517, 1770.88)(251.81618, 45163.46)(252.03023, 13711.915)(253.0288, 30742.61)(254.03185, 2081.3967)(271.48727, 568.6043)(273.059, 170.51)(255.92683, 2197.3538)(257.00638, 610.4204)(274.0775, 146.92)(294.03787, 1043.4911)(276.96356, 34609.402)(278.00034, 2817.257)(279.0345, 2082.57)	1.28269
ADENINE-RING	7109180	1	6743036	39538736	66135784	9792969	14543033	78868752	10372184	33759992	27000804	31292396	31059578	37955328	36016412	63209248	3490780	263435	6596796	5973047	6325081	12590881	6245984	9629365	11561621	4167680	6750757	16730759	21625718	7657549	1	12961613	ADENINE-RING	ADENINE-RING [ C5 H5 N5, tgt=91.90, overall=91.90 ]			(135.17474, 2684.8962)(136.06186, 385781.97)(137.06374, 26031.902)(138.06001, 3276.0112)(153.97798, 6365.3457)(159.18742, 630.0085)	3.88662
18-HYDROXYOLEATE	2859180	3249615	3748105	1824024	2508476	3067489	2345788	4016650	1761002	10188156	12648873	2890810	1416995	1060604	2246181	985817	3792323	1	895915	2197308	1026456	1	1	1	1	1	1	1	2026413	1	1	4189347	18-HYDROXYOLEATE	18-HYDROXYOLEATE [ C18 H33 O3, tgt=99.59, overall=99.59 ]			(297.24106, 9119.849)(298.2443, 444.36)(279.2321, 96174.3)(280.2353, 18760.164)(281.241, 2118.6626)(282.2403, 230.18)(303.26572, 601.6667)(281.81827, 3752.5547)(284.50232, 3307.585)(316.0429, 8197.853)(317.7243, 5660.8047)(319.28397, 8033.2603)(320.28784, 1992.72)(298.66257, 15322.941)(299.13135, 5268.514)(324.11993, 805.87756)(325.2493, 588.775)(303.2276, 56654.29)(304.22412, 5200.636)(307.2395,…	25.8389
23-DIPHOSPHOGLYCERATE	388295	531523	408458	466427	520993	436086	454000	370061	477352	1	1	226123	173776	239014	166148	205597	388727	195540	257525	168568	156763	1	204599	195405	240895	194436	252811	238196	248473	219229	261636	217843	23-DIPHOSPHOGLYCERATE	23-DIPHOSPHOGLYCERATE [ C3 H3 O10 P2, tgt=80.32, overall=80.32 ]			(263.92715, 1715.7084)(261.9284, 11410.209)(262.93234, 196.31331)(246.25911, 371.28333)(248.9318, 3263.05)(283.14435, 774.88275)	1.40471
L-ARGININO-SUCCINATE	1883701	1924387	4781649	6485649	3834515	1	2460725	771918	1284732	598138	1	2262999	2235913	2620012	2168083	1	1	5845213	1553183	3894168	768206	931393	13313236	1927971	15499093	714097	1854173	1	2067165	1207868	1	16819984	L-ARGININO-SUCCINATE	L-ARGININO-SUCCINATE [ C10 H17 N4 O6, tgt=67.51, overall=67.51 ]			(291.4382, 3292.0947)(293.04367, 1900.0084)(273.41653, 7748.863)(273.9652, 2779.9414)(275.1107, 34694.09)(276.1134, 6016.3)(292.29425, 22515.998)(291.6231, 1618.51)(272.9961, 6822.381)(273.74084, 1982.33)(308.73508, 17462.049)(309.72586, 5880.887)(311.15866, 6668.3228)(312.1622, 5979.02)(290.76508, 3198.278)(294.1487, 1098.03)(314.27664, 3519.7603)(315.39752, 1035.3344)(296.43314, 162.59999)	7.12162
CPD-11293	167135568	126298768	12728139	183769264	137560512	144446672	149761312	134693616	147854048	67026116	113659392	146538368	131780912	117464072	123689944	101736192	1	121836208	120382480	219182768	271417056	274747968	25838230	4827513	214827776	24493036	24590332	241237472	3603605	3040675	212236944	17745228	CPD-11293	CPD-11293 [ C15 H25 O7 P2, tgt=69.06, overall=69.06 ]			(383.74573, 6502.659)(361.093, 4551856.0)(362.09586, 1010266.56)(363.09808, 170567.73)(364.10062, 20332.154)(365.1029, 4858.86)(383.0869, 5243.297)(366.921, 608.076)(382.1356, 138.88)(404.0635, 1639.7014)(405.23624, 7424.816)(406.10474, 1351.1676)(386.25232, 2968.7766)(387.19696, 9236.929)(388.09393, 1866.1481)(389.0937, 189.44)	19.0446
UDP-L-RHAMNOSE	1	172439	241045	477004	1	1	1	1	1	1	1	1	1	1	1	1	1	1	1	1	1	1	1	1	1	1	1	1	1	1	1	1	UDP-L-RHAMNOSE	UDP-L-RHAMNOSE [ C15 H22 N2 O16 P2, tgt= ]			(551.0509, 701.64)(553.0617, 245.86)(534.0531, 19332.396)(535.0565, 304.97)(549.0631, 9990.823)	30.134
12346-PENTAKIS-O-GALLOYL-BETA-D-GLUC	1	240354	267530	549487	851222	706018	1	1	1	1	1	1	1	1	346193	204271	1	1	1	1	1	1	1	1	1	1	1	1	1	1	1	1	12346-PENTAKIS-O-GALLOYL-BETA-D-GLUC	12346-PENTAKIS-O-GALLOYL-BETA-D-GLUC [ C41 H32 O26, tgt= ]			(946.1522, 3562.7856)(947.1563, 939.75336)	29.6503
CPD-14510	9323495	4587223	5003308	10782565	4335331	7585968	7753167	3260903	2506882	2209433	1832351	4836956	2451730	2613784	3547822	1097129	2934454	2062234	1026302	6466103	2250775	3506695	9031944	4864160	3767170	3092113	6429501	7232094	6024880	3056148	3117232	4047815	CPD-14510	CPD-14510 [ C15 H24, tgt=98.14, overall=98.14 ]			(205.19533, 186569.53)(206.19844, 32968.17)(207.20204, 2186.9683)(222.22198, 1378.9202)(227.17587, 17514.283)(228.1703, 4281.22)	26.6488
CPD-14511	7131832	2542752	7685715	9129998	8048494	9214599	9762619	8977176	7480275	1021964	1675559	7470315	7878317	7109671	8453677	6348577	9055481	1	6107587	9329956	6130273	8938936	9242207	11139556	10453813	4054177	10633075	9909657	11629094	14886304	11317911	19485872	CPD-14511	CPD-14511 [ C8 H18 N O, tgt=76.29, overall=76.29 ]			(144.13814, 143607.7)(145.13957, 17445.521)(126.12755, 896.3333)(168.92471, 9625.626)(168.1388, 1296.2)(149.26027, 198466.95)(150.11801, 25522.602)(151.11618, 5518.426)	9.9595
CPD-14512	2385363	1	1	1289779	659941	2878560	1	1	2466547	4220696	1	2871019	603720	1	1	1	1	1	1248343	2645717	993266	1	3094990	1	1	8542559	6307343	5003987	5042704	1	8533508	3779481	CPD-14512	CPD-14512 [ C8H16NO, tgt= ]			(142.12254, 123923.336)(143.12323, 13326.255)(124.112144, 46145.047)(125.10663, 8157.143)(169.12453, 11770.268)(150.11269, 13476.959)(151.1123, 10872.58)	11.5356
CPD-14514	7131832	1	7685715	9129998	8048494	9214599	9762619	8977176	7480275	1	1	7470315	7878317	7109671	8453677	6348577	9055481	1	6107587	9329956	6130273	8938936	9242207	11139556	10453813	1	10633075	9909657	11629094	14886304	11317911	19485872	CPD-14514	CPD-14514 [ C8 H18 N O, tgt=76.29, overall=76.29 ]			(126.127495, 458.1975)(169.13228, 8105.1245)(149.11702, 205439.53)(150.11801, 25522.602)(151.11618, 5518.426)	8.34044
CPD-14505	3976399	1181339	1488429	1357296	1095659	1407091	1571312	1254480	1221497	1572648	1413893	2390766	2814341	946630	4917374	3156849	1081401	1527369	1174529	4995211	2549375	3138109	3150096	3342812	3003921	3041156	3067189	2516793	3005525	3526802	1615533	1197262	CPD-14505	CPD-14505 [ C32 H50 O13, tgt=70.70, overall=70.70 ]			(642.7021, 8900.985)(643.9014, 4052.6362)(646.3361, 2802.4236)(647.3305, 562.23)(625.0327, 3052.2046)(627.3223, 3668.3071)(628.5262, 2272.232)(628.3283, 1256.48)(644.6717, 2045.02)(646.1767, 3764.34)(646.339, 2229.6099)(626.9958, 4366.9062)(627.90283, 11885.133)(628.6967, 6879.726)(629.32965, 3031.4475)(630.3287, 3894.5798)(631.33093, 1533.012)(661.17694, 3574.0625)(662.31946, 1826.8734)(662.3588…	16.5868
CPD-15390	4997136	3680967	7161480	5747942	4023986	4286529	4494315	3949175	4444022	1846452	3259194	4530730	3931700	3420698	3662876	2954621	5123521	3552435	3517437	7412167	9932221	10135106	10887525	10908032	7128612	7692151	8586382	8281012	9964196	11259261	6679978	9788873	CPD-15390	CPD-15390 [ C10 H12 N5 O7 P, tgt=84.47, overall=84.47 ]			(331.04523, 17566.771)(332.04892, 2987.959)(346.06912, 10198.088)(347.07245, 1636.9844)	18.9365
CPD-14504	851178	329762	753564	682410	1	1052022	1848412	1538168	1232049	197282	178830	529343	240013	577739	447155	756261	138116	356284	729402	755680	687464	672609	375988	564683	473177	478065	125232	417135	750774	928459	275844	740351	CPD-14504	CPD-14504 [ C38 H60 O18, tgt=67.97, overall=67.97 ]			(804.3735, 2791.9724)(805.37744, 656.47125)(806.3798, 247.18001)(787.67145, 2489.074)(788.36646, 1656.365)(788.3694, 273.1)(807.3969, 412.49)(788.30145, 6554.572)(788.3732, 3266.59)(825.6779, 1268.4813)(825.6725, 3151.96)(825.92444, 1913.3)(826.4219, 2334.17)(806.7407, 1313.9083)(807.1598, 2020.4026)(807.41095, 1184.47)(808.414, 1776.9951)(809.92224, 1730.17)(810.4237, 4733.29)(827.77435, 2336.12…	19.508
CPD-15391	46569076	1146632	61492176	1258012	46010872	48666828	47914800	44410920	44276500	513507	560373	774136	53528376	446236	477475	40208280	1	1078408	436487	848624	867557	1	2103183	1521018	1	2719834	2471855	1422549	955799	1237743	1192153	1	CPD-15391	CPD-15391 [ C10 H12 N5 O6 P, tgt=83.07, overall=83.07 ]			(333.06116, 2286.4968)(334.06445, 485.60248)(315.0505, 235356.44)(316.05362, 37800.34)(331.06396, 3829.0781)(332.352, 622.8915)(333.8138, 887.185)(334.0649, 362.52)(313.59827, 18654.773)(314.05548, 3339.7793)(315.05804, 787.1225)(349.09018, 1986.4631)(350.0948, 823.86)(330.578, 65727.414)(331.17865, 23040.59)(332.08115, 3595.8635)(333.08734, 218.56)(338.03613, 582.6543)	15.6771
CPD-15392	1393958	1616068	1770071	1217043	1860378	1	1	1	1606512	1	1117832	1	1	1042182	1	2130845	1	480553	1408176	1	1	1	1	1	1	1	1	1	1883804	1976263	1	1	CPD-15392	CPD-15392 [ C9H12N3O7P, tgt= ]			(307.0451, 267.59)(310.0567, 77.5)(309.0596, 1765.51)(310.0562, 149.69)(311.0579, 35.15)(290.38065, 597.64)(323.07578, 5175.29)(324.07886, 1729.5)(325.0763, 34.5)(305.06546, 22215.625)(306.0681, 2569.337)(307.07, 248.83363)(313.36148, 3324.5735)(315.03058, 146.26001)	8.18035
CPD-14506	435727	281769	1	473497	1	424135	420684	444017	353584	1	113434	1	1	1	1	1	296705	1	220413	1	1	1	1	124763	115433	1	120816	1	1	1	1	178140	CPD-14506	CPD-14506 [ C44 H70 O23, tgt=56.39, overall=56.39 ]			(966.93506, 309.08002)(951.5783, 1036.3743)(952.43384, 1160.8301)(968.1052, 380.15)(952.6933, 365.91748)(953.4401, 333.99)(986.23737, 532.3461)(987.4676, 509.43002)(988.67206, 543.166)(989.35596, 349.31876)(990.0488, 476.22858)(991.04846, 480.8414)(991.476, 405.02002)(966.45764, 361.19373)(994.9356, 2800.447)(996.3273, 4886.805)(996.4366, 6399.06)(971.41614, 4370.1646)(972.4129, 483.17572)	6.59969
CPD-15393	1394250	2057474	1444025	1588863	1	1376414	1463851	1411023	1591797	748992	640643	1551910	1	1348925	1492948	1509317	1915331	1595637	1439128	1001522	1319870	1262415	415470	1335241	1280079	1852927	1487083	1247692	655157	1243712	1289744	748717	CPD-15393	CPD-15393 [ C9 H11 N2 O8 P, tgt=38.98, overall=38.98 ]			(306.85925, 2439.3499)(289.21588, 1987.1675)(309.37216, 688.51666)(293.75113, 1374.6111)(294.0322, 11754.51)(328.5452, 677.76215)(329.0743, 825.76)(309.05853, 9059.353)(310.876, 428.19226)(311.0572, 574.485)(333.02188, 1256.0267)(312.50635, 2534.5452)	1.43197
CPD-14508	7914071	7423075	13984139	10600781	13316961	7463450	15988800	12057244	7844287	7597415	7463771	13484103	11860673	8875658	11456507	8959555	1	1	6976036	16920576	31271796	9244265	20584844	7879756	11240821	10479990	13493738	8990065	8333627	10562928	9492440	15257175	CPD-14508	CPD-14508 [ C26 H40 O8, tgt=92.88, overall=92.88 ]			(483.13467, 6073.337)(482.2826, 1963.0625)(466.8022, 73331.46)(465.93567, 60040.066)(468.2741, 5970.59)(486.6722, 1229.1937)(485.79138, 1605.7)(485.2842, 543.11)(467.63544, 177594.84)(468.11606, 109790.68)(468.28677, 39634.176)(469.2905, 8272.71)(498.90485, 1092.7511)(501.3186, 5248.42)(502.3226, 1437.93)(482.29968, 42875.64)(482.58914, 16870.271)(483.5044, 6586.2744)(484.80545, 409.8675)(504.403…	12.9703
S-HYDROXYMETHYLGLUTATHIONE	3424955	2484542	3592116	2721496	2243537	2357505	2653767	2086544	2335521	762732	1665316	1752864	1988828	1180663	2265748	1970370	1	1126109	1579773	3667863	1741757	1381740	1657634	1429522	1	1	668417	1398302	1	1119292	1	632599	S-HYDROXYMETHYLGLUTATHIONE	S-HYDROXYMETHYLGLUTATHIONE [ C11 H18 N3 O7 S, tgt=73.14, overall=73.14 ]			(340.9017, 5652.205)(341.66977, 2336.9255)(342.0983, 5745.8)(325.0891, 14608.28)(354.34332, 16723.975)(355.34802, 1695.0923)(356.106, 404.44)(336.11038, 129520.03)(337.1143, 18603.07)(359.07788, 2181.3232)(341.06586, 34797.46)(342.57123, 1701.6499)	19.5112
O-SINAPOYLGLUCAROLACTONE	32117616	55422788	26990188	25141296	36192012	22003660	12786311	15341623	27899426	43348304	20534956	31030284	38088808	36639844	18530706	36915756	2327917	42509552	33017636	17161064	36761640	22349210	25860604	288047	15890017	43474508	41378804	25167534	217416	19967046	27678382	13128711	O-SINAPOYLGLUCAROLACTONE	O-SINAPOYLGLUCAROLACTONE [ C17 H18 O11, tgt=68.77, overall=68.77 ]			(400.08914, 5250.6465)(400.0903, 841.78503)(381.0799, 934780.2)(382.08307, 123013.41)(399.1137, 782.57446)(424.8511, 9112.247)(426.09122, 900.0087)(404.02908, 12789.606)(405.1342, 2405.1064)(406.41934, 6186.799)(407.16687, 14312.23)(408.07925, 2096.4673)	2.72009
5-METHYL-THF	1776145	6773369	3432215	5545029	5268407	5548769	61940160	3646395	6083913	2279582	3078789	5701849	4226322	3576611	5328241	4485045	1244769	5559349	4039887	8980671	3003330	4638978	6890482	5518899	5430840	5645709	5262255	7213398	5264705	3619996	4929293	6932980	5-METHYL-THF	5-METHYL-THF [ C20 H23 N7 O6, tgt=72.80, overall=72.80 ]			(459.1759, 14194.7295)(461.29395, 6097.4775)(439.18918, 50327.887)(440.16153, 20150.434)(458.5354, 4240.3823)(459.93427, 17887.643)(461.18503, 7259.335)(462.19086, 1950.93)(441.22824, 61272.688)(442.2324, 13853.075)(443.5791, 4808.106)(444.17236, 480.59)(445.1857, 3291.15)(475.42145, 180193.44)(476.3242, 50703.04)(477.20984, 9517.054)(460.88437, 4313.631)(461.2052, 9691.18)(481.76917, 9465.87)(48…	13.2105
CPD-10734	1244767	1132364	2446268	2169793	1118607	1375405	1313887	1426795	1061754	682704	1475824	1118833	2008280	757833	1611776	1440088	1427587	2117307	1134541	2608246	1187038	1253739	2056639	1170614	1549623	1731335	1288214	1218040	1818699	2146673	1745687	1832332	CPD-10734	CPD-10734 [ C9 H15 O9, tgt=98.36, overall=98.36 ]			(267.2855, 17896.883)(269.07727, 14039.469)(270.08047, 1333.5166)(249.06107, 59173.883)(250.0649, 5706.97)(251.06612, 533.5363)(286.6086, 9916.988)(269.7385, 3661.19)(293.0695, 540.17)(275.05548, 9109.68)(276.56265, 206.32)	16.6424
CPD0-1386	2107877	2101142	2797621	382285	8687174	5725406	464323	228067	2854896	2695118	2651486	405375	7628861	5942845	233472	1372826	1	1314201	2565378	803138	1126517	721528	1156251	1	558540	656514	19989702	1057942	821444	1	1042474	435332	CPD0-1386	CPD0-1386 [ C4 H8 N2 O3 S, tgt=59.86, overall=59.86 ]			(146.0126, 29815.814)(147.02284, 1731.1567)(148.0347, 75.24)(170.0349, 206.99)(147.0224, 11636.703)(148.03479, 348.88)(185.55824, 993.25757)(187.0603, 693.53)(166.17542, 1899.2673)	23.8582
CPD-11881	894064	730610	604333	377709	298077	639881	1	1	1	1	1	1	1	1	1	1	1	1	1	1	1	1	1	1	1	1	1	1	1	1	1	1	CPD-11881	CPD-11881 [ C31 H42 N7 O20 P3 S, tgt= ]			(964.1495, 136.92)(944.14325, 455.315)(945.4798, 397.16666)(980.14417, 3969.3699)(967.63574, 346.7975)(968.80225, 694.0734)	24.383
CPD-11230	7335906	1	9106592	8417954	9034131	10676975	10452681	9165492	8652023	3300495	2813384	8901697	5587589	8404197	14547809	6877970	5306983	4581271	1	8904808	6940739	4893994	66032300	10662021	6838971	8295489	6420429	36036164	8379764	10397451	7516465	1	CPD-11230	CPD-11230 [ C21 H18 N3 O3, tgt=50.47, overall=50.47 ]			(360.1302, 198837.62)(361.14093, 57158.76)(362.1445, 11593.673)(363.14, 315.21)(343.75266, 14533.157)(344.84772, 3414.6204)(345.38214, 793.13495)(363.81445, 2558.2065)(344.1373, 7887.8433)(344.6405, 1637.6575)(346.1434, 1371.77)(347.1447, 1735.58)(380.6023, 4579.437)(379.67944, 949.86)(363.167, 1112.2599)(363.1613, 324.19)(364.1649, 5548.14)(386.55017, 1737.9366)(387.4686, 2282.1868)(368.06924, 1…	8.99034
CPD-11231	790081	858592	892336	871076	1168441	2143803	849606	847070	2500950	485160	583045	1010994	952529	979154	1057919	1189353	1	830377	1013540	760482	884865	961649	5134769	6200475	3594535	2123724	1016921	5375008	4899013	1009398	3130336	1	CPD-11231	CPD-11231 [ C15 H15 N2 O3, tgt=75.93, overall=75.93 ]			(272.808, 17023.068)(274.11548, 3824.2397)(254.33336, 8580.064)(256.00967, 1956.0934)(257.60812, 1832.1484)(258.10767, 1599.265)(277.12885, 335.218)(255.44267, 976.63666)(292.56955, 5043.2217)(294.15524, 1526.99)(271.88416, 16539.844)(296.43875, 1815.7246)(297.43967, 1023.4566)(279.0956, 6721.1724)(280.4338, 1853.0333)	15.5807
CPD-11232	7282752	12771106	7728633	8584739	19765764	20020072	23581316	9909678	14424007	1	15846650	1	14557636	1	6114822	10582225	12303049	11602748	1	8438415	17433518	1	5548723	4019527	54729004	30437294	16895768	28954348	21787370	17497978	23848444	1	CPD-11232	CPD-11232 [ C18 H28 N O4, tgt=67.17, overall=67.17 ]			(322.47476, 13129.179)(323.196, 9281.532)(306.62827, 71120.31)(309.0215, 15758.325)(309.2061, 24539.51)(325.3148, 15162.877)(326.09442, 14589.265)(326.22095, 35394.5)(305.9501, 488614.56)(307.25153, 77224.45)(309.8765, 5617.8496)(310.2116, 503.11)(341.31424, 15737.418)(342.553, 49219.9)(343.23926, 205625.27)(323.70026, 1444.4817)(324.2267, 1517.85)(348.00232, 67042.305)(348.2038, 28932.014)(349.8…	24.7251
CPD-11884	3825003	880302	3856989	3440329	3620855	732339	963525	443731	1	3622326	3406455	1	3159224	3385316	2905590	2896615	1	796322	474077	2630498	1	1863491	1833638	2624356	1288992	1961824	1	2738645	2459349	1624820	2060538	2616309	CPD-11884	CPD-11884 [ C10 H9 O3, tgt=87.43, overall=87.43 ]			(177.0547, 96749.72)(178.05824, 10628.745)(179.06607, 766.784)(162.0501, 3206.69)(179.06775, 2706.4248)(196.76112, 2073.8757)(197.0927, 221.36)(179.08372, 5705.016)(179.41887, 6346.78)	20.9948
CPD-11233	5370430	4767776	5025007	6790598	5538951	4357496	3183103	3882570	4295199	2099224	1129234	5111556	1	8722112	3428099	3797427	1	2368950	5706188	3544602	7537974	7021285	9557214	3950560	4796129	9006065	4108010	8028072	7456862	4857349	6283449	4027189	CPD-11233	CPD-11233 [ C17 H26 N O4, tgt=93.83, overall=93.83 ]			(308.75983, 14893.481)(309.99106, 4194.4062)(291.28888, 17896.705)(310.37064, 6474.783)(312.0036, 27097.168)(313.70728, 25141.94)(293.18875, 151366.55)(294.19125, 28315.639)(295.24713, 8958.538)(296.1985, 1202.0283)(326.332, 26012.172)(327.22943, 6407.2295)(310.9225, 4056.136)(313.21912, 9197.19)(316.94647, 26589.086)(317.17825, 33364.35)	20.6539
ORCINOL-CPD	8543406	9053070	21081886	8118439	8689046	10770583	22071484	18832988	11346294	1	3189756	7855398	5825065	4911516	10952318	4929610	16469549	4397004	6587226	23527360	3652743	2793058	7777143	9509349	1	5718967	4628945	12727932	7726945	16015575	1	3318710	ORCINOL-CPD	ORCINOL-CPD [ C7 H8 O2, tgt=87.85, overall=87.85 ]			(125.49565, 357647.75)(111.05631, 1085.6871)(127.54835, 23881.398)(129.27002, 6980.918)(107.04892, 93768.73)(108.05268, 8453.399)(109.054535, 256.50168)(142.45018, 8198.342)(124.07553, 9277.529)(147.2823, 15081.305)(148.0476, 1647.42)(130.03477, 2194.6426)	19.3662
CPD-11234	7282752	1	7728633	8584739	19765764	20020072	1	1	1	1	1	1	1	1	1	1	12303049	1	1	1	17433518	1	5548723	4019527	54729004	30437294	1	1	21787370	17497978	1	1	CPD-11234	CPD-11234 [ C18H28NO4, tgt= ]			(322.60202, 14760.159)(323.196, 9281.532)(306.6002, 43614.926)(309.20328, 15757.772)(325.07236, 15093.425)(325.4693, 17941.104)(326.2216, 33689.69)(305.9268, 544461.75)(307.2928, 92174.0)(310.211, 2698.655)(341.62354, 20120.82)(342.6153, 69394.516)(343.23898, 280305.94)(323.7294, 1472.9325)(324.2267, 1517.85)(348.60367, 10874.652)(348.70184, 23802.395)(349.7072, 17574.2)(350.2036, 6716.81)(330.96…	26.9078
CPD-11235	5512468	10734758	3577421	17599660	16772945	21976042	1	16092824	33487948	1379412	1565156	9752108	18945076	12199391	11347355	15215047	23629096	13245214	10561682	18425212	63279996	11634789	22241120	17587848	16975926	19539836	12505341	1	14402653	15757052	11854049	12247788	CPD-11235	CPD-11235 [ C21H26NO4, tgt= ]			(357.3552, 19876.357)(358.694, 57480.203)(359.5271, 9843.704)(360.1994, 3731.39)(339.75348, 5943.9766)(340.78204, 23853.035)(341.18097, 7903.2905)(343.1895, 604.935)(360.4773, 22204.04)(360.60565, 12344.25)(360.2033, 3197.8801)(362.2123, 6701.93)(340.30353, 11050.785)(340.31134, 2469.7336)(341.1844, 811.24)(376.70673, 15825.751)(377.39368, 16590.898)(378.23108, 8935.95)(356.48856, 535213.6)(357.3…	16.358
S-METHYLGLUTATHIONE	1	2375834	2597185	12536090	3685647	3816325	2383547	2432689	2603475	1791167	2084391	1279160	2166152	2373583	3012804	5760877	1	467816	1188659	7482229	4938193	7666957	728542	9320161	8925885	3133238	2290577	1	417337	524982	2020165	1	S-METHYLGLUTATHIONE	S-METHYLGLUTATHIONE [ C11 H18 N3 O6 S, tgt=73.84, overall=73.84 ]			(323.84305, 25635.643)(325.09625, 6365.495)(326.0924, 11400.939)(323.50098, 5643.6924)(305.17447, 6476.571)(304.59033, 1669.7031)(340.32373, 11181.732)(339.12515, 5385.235)(340.1244, 899.54504)(323.88657, 3161.7292)(344.58365, 145563.06)(344.08508, 37506.727)(330.0743, 1350.2)	21.0082
LUTEOLIN-7-O-BETA-D-DIGLUCURONIDE	242121	941178	499494	346263	519975	216303	1	110125	316076	248907	208262	1	161470	93392	1	175957	1	106417	1	1	1	1	1	1	1	1	1	1	1	1	1	1	LUTEOLIN-7-O-BETA-D-DIGLUCURONIDE	LUTEOLIN-7-O-BETA-D-DIGLUCURONIDE [ C27H24O18, tgt= ]			(663.088, 277.33)(644.0831, 49450.043)(645.0866, 9940.685)(646.0833, 9211.6875)(647.08673, 1496.85)	1.45495
CPD0-1397	576762	519511	1	733007	5465081	3135562	1715365	10302181	12195627	1125048	7719127	2786105	5929931	1485553	1503953	1	4502221	4820486	925744	2451721	2143661	1	2022084	3436459	2110378	1	2510970	3190993	1987099	2840344	1643119	4706789	CPD0-1397	CPD0-1397 [ C6 H16 N8, tgt=63.86, overall=63.86 ]			(203.00984, 36804.26)(202.8739, 190063.78)(205.159, 64128.543)(206.16182, 648.9133)(221.18863, 4415.406)(222.1869, 534.76)(225.1428, 26829.2)(226.56287, 1464.2411)(227.14064, 3563.5374)	18.4191
CPD-11227	6578197	4320746	6386875	6297186	4219363	7349582	2962521	2409737	1211224	11423911	5847408	2494386	1344582	1486328	5925528	659979	1	3920447	4090758	2236896	2789420	4244111	4884425	3737826	4493733	3821047	2002739	2914575	2581629	1	2787443	1	CPD-11227	CPD-11227 [ C16 H19 N2 O3, tgt=61.10, overall=61.10 ]			(287.52652, 4337.13)(288.13895, 719.98663)(271.634, 15035.387)(273.14172, 5020.468)(271.13315, 1518.8049)(291.154, 2555.82)(272.8093, 14959.515)(273.478, 9014.44)(273.1486, 35847.04)(274.1445, 528.76)(308.5955, 4274.984)(309.5198, 1886.3217)(309.1855, 1367.2)(290.72726, 28431.441)(291.24463, 28450.217)(310.75665, 3539.6965)(311.9669, 1811.0801)(313.1329, 67.13)(292.28662, 3866.4402)(294.12088, 10…	11.2744
CPD-11226	1856170	1049210	2999415	1482684	2711357	8768826	2432467	2037226	1209605	5845542	1	4272498	1558938	5411491	1900377	1190693	1	4573830	1101172	2179591	4954631	10961135	1283013	977922	1313520	7560825	3705520	1	8366739	1921673	1583163	3223714	CPD-11226	CPD-11226 [ C12 H11 N2 O3, tgt=69.68, overall=69.68 ]			(232.58014, 1194.9438)(233.07976, 1844.6666)(214.10353, 69728.76)(214.42497, 14770.755)(215.3377, 11605.819)(216.06432, 598.9133)(237.0941, 1889.21)(217.66301, 7867.012)(218.085, 4521.58)(249.20352, 2047.0844)(250.11705, 591.8934)(231.2943, 59379.07)(232.10484, 17834.787)(233.09984, 8770.996)(258.07904, 2800.9087)	9.89432
CPD0-1398	1	5063424	6168921	5820868	1	2934107	6532630	5811812	7857535	10367378	5114619	19538788	5908134	2844916	15458724	5137341	15010373	19474956	1923380	10396965	5957456	4839596	14808782	3243945	3697419	1907848	2516457	2693929	2232681	2105594	735457	4470897	CPD0-1398	CPD0-1398 [ C5 H14 N8, tgt=81.40, overall=81.40 ]			(186.13182, 55744.453)(190.14412, 1472085.4)(191.14726, 154733.16)(211.92552, 13779.924)(213.05891, 28121.803)(213.73463, 65418.51)(214.12502, 76490.47)	18.9973
CPD-11229	1	1532615	3149154	3451567	2252578	1	1	1	999895	1	1	1975024	2417268	1	1	1699601	1	1262744	1	1	1	1037686	1	1	1	1198792	1	1	1	1299120	1	1	CPD-11229	CPD-11229 [ C19 H17 N2 O4, tgt=47.62, overall=47.62 ]			(337.3161, 8596.298)(341.1244, 5967.01)(342.1287, 630.44)(320.0189, 3759.5654)(320.11273, 945.562)(341.13788, 1962.6886)(342.13824, 280.16998)(343.1393, 2849.89)(320.61755, 2344.5798)(357.0653, 9290.921)(358.6619, 17045.668)(359.8297, 18669.176)(337.962, 15259.179)(339.6499, 4910.6055)(341.1532, 3018.97)(364.00867, 9424.715)(363.61554, 1124.19)(343.54764, 8828.27)(345.86, 25857.627)(345.1095, 393…	9.80492
RUTIN	1050561	1	757734	996713	1	869700	1453645	1377036	1	1	1284717	1	1	719471	1	1	2951326	1	1	3019262	789433	1017514	1883368	1	1	1	755406	1	1	1	1	1	RUTIN	RUTIN [ C27 H30 O16, tgt=99.37, overall=99.37 ]			(611.16, 37231.45)(612.1641, 10449.31)(613.1668, 2560.23)(615.1715, 3683.02)(616.1755, 1028.57)(611.16064, 24560.96)(612.16455, 6929.36)(613.1668, 3010.11)(593.4847, 36514.73)(594.15356, 11830.682)(595.1559, 2686.9724)(629.1839, 15091.34)(630.1877, 4869.2866)(631.1963, 4232.027)(632.2054, 918.84)(612.1849, 202.38666)(636.22974, 3439.2031)(634.1461, 4589.75)(635.1485, 547.74)(615.1318, 2829.3494)(…	17.1561
CPD-11228	2184093	1	1	2586864	1	2967391	2907062	2622307	1	1	982238	1093603	2871953	2362580	2966497	799126	2277849	1298233	1159704	2881727	2694532	2365325	2799449	2574857	2837906	2618440	535353	477495	2777178	3503869	461660	4489043	CPD-11228	CPD-11228 [ C15 H17 N2 O3 S, tgt=69.60, overall=69.60 ]			(308.84973, 5137.5273)(290.5089, 55908.535)(291.68863, 7757.337)(292.44992, 1827.19)(293.086, 772.44)(306.83273, 1167.1099)(309.60156, 4019.7349)(310.1018, 566.37)(291.81912, 3484.7083)(290.59393, 494.86002)(294.0939, 1733.69)(324.6899, 8640.085)(325.96405, 6341.7017)(326.86533, 1723.5306)(327.13232, 185.13501)(306.8886, 8177.2637)(308.45352, 3777.6628)(310.29025, 1731.874)(310.45825, 361.26334)(…	4.74325
CPD0-1394	745819	766338	1031474	794350	615343	647153	593808	508812	672539	270633	543915	888041	965015	1668425	1344282	560243	1649840	1464538	1230307	1124422	1034377	966958	1205978	1140038	796416	1354631	941649	764006	834605	1138909	743862	637300	CPD0-1394	CPD0-1394 [ C9 H10 Cl N2 O11 P2, tgt=37.46, overall=37.46 ]			(422.28055, 853.5351)(407.9413, 631.56)(420.08167, 1371.8947)(424.9606, 210.98)(425.9636, 485.15)(404.94424, 722.8084)(407.6127, 408.04)(442.9863, 1301.72)(422.2495, 4890.216)(422.30008, 2386.0432)(422.9651, 4819.3853)(423.9668, 1281.97)(424.0188, 3505.513)(425.64227, 717.1657)	1.27941
CPD0-1396	7084422	5386865	4965832	7927734	4963398	8125280	11680640	9202630	9198693	2356146	4225354	5564130	4174073	7755121	6263967	5066237	6771659	6234524	7655430	6550446	8883447	1481618	15636590	11101596	18638898	4452918	9470243	26862480	1837579	1764529	12474850	1703936	CPD0-1396	CPD0-1396 [ C12 H18 N5 O3 S, tgt=85.69, overall=85.69 ]			(312.1837, 62426.96)(313.18558, 8782.697)(314.11, 6437.141)(315.11026, 854.24005)(294.13702, 51216.395)(295.17636, 6596.433)(296.11493, 858.69476)(316.15192, 2807.1775)(318.12183, 1995.0425)(318.62512, 3159.79)(296.69467, 3352.627)(299.73495, 2385.56)(301.11087, 3489.275)(333.21466, 1718.1521)(332.8937, 633.4675)(315.90033, 3473.766)(314.6328, 1661.4099)(340.0585, 2802.2043)(341.1074, 122.37)(319…	6.21009
CPD-13495	1805764	13569625	2608988	3239852	3040445	16617454	3272108	2714906	3022816	1243502	1252238	1	2365583	2132681	1473949	1408863	18085092	1775462	2367886	2994274	4833934	12097813	1479010	22241748	12560918	9346605	1644892	1410783	1972988	2298159	1393063	2996340	CPD-13495	CPD-13495 [ C16 H24 O4, tgt=57.07, overall=57.07 ]			(281.3299, 79411.18)(283.17596, 152605.98)(284.18, 24687.195)(264.23807, 45468.938)(265.49683, 16350.817)(267.0798, 9383.9795)(282.23352, 16113.306)(283.4875, 31008.857)(286.188, 205191.9)(265.90585, 29801.574)(267.179, 27805.25)(299.20334, 18562.033)(280.19025, 8895.669)(281.1847, 901.52)(282.1859, 373.11)(305.66376, 11357.724)(307.76758, 3787.118)(308.1677, 18570.46)(285.41446, 18359.562)(286.1…	12.4521
CPD-13498	2481413	4022708	2874311	2546344	3246750	3152480	2902582	2790634	3007037	1553910	1663429	2632954	2840954	3364935	3109654	3356107	3542208	3149628	4197353	1907002	2924246	3224279	4374528	3835191	3230159	4446715	4437801	4202459	2858232	3678171	3420257	1	CPD-13498	CPD-13498 [ C19 H29 N5 O10 S2, tgt=80.02, overall=80.02 ]			(552.1353, 482.50552)(536.73785, 168240.16)(537.9979, 73420.53)(539.0002, 17530.07)(539.1294, 14134.05)(556.14813, 3138.0776)(557.15015, 755.152)(553.15515, 57760.72)(554.15894, 15738.54)(555.16266, 3624.6362)(556.3779, 1257.8005)(557.15204, 364.655)(560.1095, 6648.174)(561.1109, 1893.0734)(562.12256, 933.79004)	13.3801
D-TRYPTOPHAN	28660184	45122996	37182512	31896572	23646310	30525820	1	21902500	43903036	36550628	124246624	1	40353000	38185368	43506808	18794076	126068864	46277916	69984856	1	51918860	36765080	78480320	50582352	44256412	123531008	68641552	51505492	60980848	53678228	30255776	27183526	D-TRYPTOPHAN	D-TRYPTOPHAN [ C11 H12 N2 O2, tgt=96.93, overall=96.93 ]			(207.85722, 5118.287)(190.21346, 6554.483)(191.09044, 8482.045)(205.09792, 1520069.6)(206.10101, 175295.5)(207.1036, 23883.027)(191.89305, 1985.2858)(224.12921, 56846.957)(226.044, 1910.9128)(206.18056, 4260.082)(227.22392, 43539.457)(228.08548, 6579.754)(229.09659, 536.0105)(211.5019, 3487.076)(214.08284, 1169.7375)	6.70713
CPD-6901	26404084	3675540	31534720	7002144	3452002	28809136	2187802	7183836	8756157	6101999	1963689	8239750	2507715	41120776	1396413	973086	33683912	2130905	2319428	28990112	2180413	2541525	1293926	1442601	2317437	1977327	2545977	1	1261358	2816202	2159484	8045812	CPD-6901	CPD-6901 [ C12 H17 N O3, tgt=62.61, overall=62.61 ]			(223.78767, 6224.2344)(209.72293, 969.438)(210.1255, 3063.595)(224.5295, 32587.787)(225.1333, 8085.342)(226.1352, 1136.66)(206.8904, 5909.1147)(207.7175, 630.138)(208.1036, 928.73)(241.1553, 208357.86)(242.15788, 34188.29)(243.1496, 1560.73)(225.27815, 6687.76)(226.95488, 4184.386)(227.15454, 1268.655)(248.19159, 2258.3176)(249.11475, 3815.19)(229.66281, 9604.5625)(232.66705, 1886.7886)(233.1114,…	2.21637
PROTOPORPHYRINOGEN	7528931	6310325	7419664	7888551	7385716	15614480	7490419	11052372	14227325	11377787	7411117	7469745	16684446	4204941	7890364	1	7472041	3502286	4509158	10777943	3939187	4692278	4464386	11615645	5317143	13903637	8207340	4739852	4174322	5986661	1	6553356	PROTOPORPHYRINOGEN	PROTOPORPHYRINOGEN [ C34 H38 N4 O4, tgt=58.28, overall=58.28 ]			(568.2937, 2920.0964)(568.5416, 3498.3774)(550.242, 126780.03)(551.04706, 51287.4)(552.2381, 16429.53)(553.29205, 8864.175)(554.2995, 8375.154)(567.58704, 28556.863)(568.6375, 10472.235)(569.30426, 2237.7866)(550.2924, 12094.242)(552.6946, 7705.392)(553.2984, 5526.8696)(586.7277, 2268.006)(588.16943, 2021.9316)(589.3386, 3764.435)(590.3445, 5204.93)(567.50433, 21740.95)(568.6546, 14724.282)(570.5…	20.2596
CPD-14544	41803592	1	1	25764604	1	1	48253956	1	85069296	48312696	1	1	1	1	1	1	9069567	1	1	1	1	1	1	1	1	1	1	1	4097859	4305399	3695757	7803552	CPD-14544	CPD-14544 [ C22 H25 N O6, tgt=84.15, overall=84.15 ]			(399.6695, 638.28)(402.1756, 483.11)(384.1674, 5829.2046)(401.1807, 48085.42)(402.18414, 13341.368)(403.18823, 1026.0349)(383.00342, 39821.59)(385.17764, 1546.61)(419.1093, 9620.28)(421.71375, 8024.1733)(400.52817, 3781.4666)(426.66495, 4811.9497)(427.1654, 5948.9)(406.27878, 7634.1416)(408.15518, 2626.5535)(407.1574, 11267.02)	12.2157
CPD-11260	6618498	1	9071445	9320670	8124459	9706210	1	6698224	5370704	1	1	1	1	1	1	1	1	1	1	1	12250828	10025593	1	1	1	5541063	5792617	1	5454748	13081762	3799888	1	CPD-11260	CPD-11260 [ C12 H17 O4, tgt=85.45, overall=85.45 ]			(207.10191, 167135.84)(208.10568, 23114.701)(209.10893, 2103.49)(226.82541, 49320.15)(227.12766, 24389.475)(209.11424, 6209.1626)(211.11746, 597.43)(244.65012, 73451.74)(245.65321, 228210.14)(246.1521, 357830.94)(226.138, 6731.592)(251.1065, 2491.775)(232.31221, 8827.521)(233.09769, 16779.963)	19.7046
CPD0-889	12754076	14380832	15689309	14471949	8589953	8867302	9266830	8266534	10696278	8579079	10067417	12078576	11303539	8493416	7729242	7133617	1	14793634	7228045	881586	15394520	18998918	33459742	29008468	14703596	38125656	36482392	24932844	22621480	28287524	26063336	1	CPD0-889	CPD0-889 [ C12 H12 N2 O5, tgt=83.91, overall=83.91 ]			(247.56985, 403.395)(266.08444, 11642.331)(267.08752, 1407.6204)(249.41374, 387.51)(284.94925, 938.9024)(268.71167, 447.732)(269.1124, 317.97)(289.92645, 3330.5044)(272.56232, 60538.312)(272.0638, 21300.66)	12.9546
CPD-20277	11822724	9049022	19230776	56879512	1	58744604	1	54470456	13551728	1	49036380	17766706	3227726	25010906	37741752	7577230	16378456	54425192	38072800	58565056	14613279	12404830	20810286	24083732	7353463	13927035	3150835	13248173	1	24443996	22639360	1	CPD-20277	CPD-20277 [ C8H15NO3, tgt= ]			(175.11127, 10486.424)(157.09756, 1197189.2)(158.10074, 31939.594)(174.11212, 9443.934)(156.10156, 114158.03)(195.15053, 2993.0962)(196.50371, 17249.92)(198.43188, 55853.637)(201.1045, 137235.06)(178.33472, 4632.388)(181.088, 228.11333)(180.0742, 133.53)	25.4702
CPD-13494	992984	1134439	847822	875180	2009655	1088463	1380684	880478	1846219	1446837	1031140	1031310	3018624	1193117	1641188	1	15172505	1533107	1050054	4992383	2711354	3822992	4552103	4023683	2114410	3760275	2250026	4643702	5956583	3557457	2011171	2379077	CPD-13494	CPD-13494 [ C17 H26 O4, tgt=60.03, overall=60.03 ]			(295.98843, 17707.38)(297.00848, 13453.6875)(297.39236, 18336.93)(298.1936, 29117.885)(277.97723, 57465.832)(279.40396, 30400.434)(280.88544, 15000.761)(281.18707, 16249.07)(296.80563, 18610.912)(297.4987, 153343.97)(300.1999, 515874.12)(277.86392, 72348.71)(315.55774, 9333.04)(295.56793, 4018.1848)(295.7066, 4733.995)(321.87842, 9020.032)(322.18692, 53801.668)(299.23538, 24384.469)(301.16602, 55…	24.1459
PREPHENATE	228939	337980	233176	187084	227885	191027	176233	171207	200336	1	1	225005	279208	560012	359018	242044	910706	351662	754721	263924	229930	253253	273959	275765	249141	289647	307322	199414	235865	270843	217953	1	PREPHENATE	PREPHENATE [ C10 H8 O6, tgt=63.59, overall=63.59 ]			(225.8363, 7038.1484)(226.53189, 604.295)(226.77472, 2925.374)(227.37709, 1858.7965)(211.83263, 5122.697)(244.82326, 4138.897)(244.6722, 2017.5399)(244.0822, 125.38)(225.30678, 490.5325)(250.41678, 112798.42)(251.76608, 7817.911)(234.0254, 301.88)	4.96988
INDOLE_ACETATE_AUXIN	3326875	2091344	3642478	3430996	199125	3196085	1219686	3098155	2752708	744931	455945	448857	269387	5669922	3233810	3331139	1399290	2267266	3882906	2301290	599063	406661	453853	302629	397482	485561	465386	423800	1967696	479975	370518	284349	INDOLE_ACETATE_AUXIN	INDOLE_ACETATE_AUXIN [ C10 H8 N O2, tgt=51.56, overall=51.56 ]			(174.66519, 5739.726)(177.0606, 195.69)(158.08061, 7216.464)(158.30287, 2785.3958)(158.0406, 1513.41)(177.67957, 8361.65)(178.64417, 1164.9857)(179.071, 297.17)(159.13322, 3343.8008)(193.98607, 2531.6233)(195.0935, 7239.7993)(174.79343, 7669.572)(175.0781, 151.19)(200.05179, 8068.069)(201.72284, 12992.768)(202.0569, 21516.32)(179.0342, 29644.887)(180.03894, 3175.95)	6.75941
CPD-10758	9323495	4587223	5003308	10782565	4335331	7585968	7753167	3260903	2506882	2209433	1832351	4836956	2451730	2613784	3547822	1097129	2934454	2062234	1026302	6466103	2250775	3506695	9031944	4864160	3767170	3092113	6429501	7232094	6024880	3056148	3117232	4047815	CPD-10758	CPD-10758 [ C15 H24, tgt=98.14, overall=98.14 ]			(205.19533, 186569.53)(206.19844, 32968.17)(207.20204, 2186.9683)(222.22198, 1378.9202)(227.17587, 17514.283)(228.1703, 4281.22)	26.6488
CPD0-1366	1283971	285929	581572	269946	1426949	1469127	235843	962043	809856	315222	1	1	722606	456004	552781	1107985	2906235	195653	279209	1	1347808	367650	338808	1	493400	210054	2646600	1	1697144	606608	2501921	258868	CPD0-1366	CPD0-1366 [ C12 H13 N O2 S, tgt=47.31, overall=47.31 ]			(236.56335, 712.29504)(237.56549, 11333.205)(219.67827, 5024.1763)(238.0741, 1846.5736)(240.07378, 72.31801)(219.8983, 5049.131)(222.33891, 1683.502)(222.46391, 7608.9834)(223.0658, 600.11993)(255.37384, 7175.555)(256.26892, 11168.068)(257.10376, 3250.7598)(237.2217, 812.26996)(238.09299, 2319.435)(259.67984, 5252.4175)(261.2398, 12080.162)(262.05435, 427.74002)(241.0491, 104.29)	7.54978
CPD0-1367	891233	3024913	3015983	832747	1234511	3626240	3490556	3833752	1147960	1492355	370545	1222573	4901320	1156690	4655414	2964594	4631822	569387	860927	2710561	2186124	3276203	3203158	3704384	4123694	2994649	3229559	3156221	2980775	4495347	1	3943936	CPD0-1367	CPD0-1367 [ C16 H16 O2, tgt=81.73, overall=81.73 ]			(240.95808, 3450.5947)(224.61371, 411.435)(241.12097, 11797.426)(223.54338, 737.99005)(224.10555, 382.93)(258.92267, 13638.23)(259.1474, 3107.245)(241.30264, 139653.81)(243.92, 100889.086)(265.1106, 11950.195)(266.03253, 2755.9912)(265.11823, 847.49426)(250.10945, 480.805)	21.6363
CPD-11259	7282752	1	7728633	8584739	19765764	20020072	1	1	1	1	1	1	1	1	1	1	12303049	1	1	1	17433518	1	5548723	4019527	54729004	30437294	1	1	21787370	17497978	1	1	CPD-11259	CPD-11259 [ C18H28NO4, tgt= ]			(322.60202, 14760.159)(323.196, 9281.532)(306.6002, 43614.926)(309.20328, 15757.772)(325.07236, 15093.425)(325.4693, 17941.104)(326.2216, 33689.69)(305.9268, 544461.75)(307.2928, 92174.0)(310.211, 2698.655)(341.62354, 20120.82)(342.6153, 69394.516)(343.23898, 280305.94)(323.7294, 1472.9325)(324.2267, 1517.85)(348.60367, 10874.652)(348.70184, 23802.395)(349.7072, 17574.2)(350.2036, 6716.81)(330.96…	24.568
AMINO-ETCETERA-PYRIDIN-1-YL-PROPANOATE	657303	581193	879018	1071762	978219	1036487	726114	812295	662534	551185	266978	749467	1	617791	834092	614602	681903	448979	432563	820398	623443	657921	854676	916958	715876	1	616936	666899	1195677	1013963	647614	810744	AMINO-ETCETERA-PYRIDIN-1-YL-PROPANOATE	AMINO-ETCETERA-PYRIDIN-1-YL-PROPANOATE [ C8 H9 N2 O4, tgt=87.47, overall=87.47 ]			(202.06772, 7473.617)(180.9833, 18556.879)(181.9864, 2754.191)(182.0529, 1573.6799)(201.07141, 5139.713)(182.3933, 6609.202)(215.8609, 5816.9434)(216.0967, 368.76)(197.22499, 7137.3896)(198.08586, 2091.9734)	14.7786
CPD0-1370	332711	299720	341937	388209	352624	378280	421756	362052	322277	231626	228860	368492	344983	269778	347608	320219	1	202780	208400	338304	354525	452428	399424	437355	397059	345592	385707	377594	376790	587822	447503	728244	CPD0-1370	CPD0-1370 [ C7 H10 O9 P, tgt=37.27, overall=37.27 ]			(252.99788, 9006.199)(252.0051, 552.87604)(269.03137, 6046.423)	20.9407
CPD-11253	6618498	1	9071445	9320670	8124459	9706210	2572098	6698224	5370704	4801371	13416309	7528625	13800763	2863443	13051688	5742816	25393908	2797785	2546238	8062472	12250828	10025593	1434583	1112101	1262838	5541063	5792617	6721560	5454748	13081762	3799888	6451241	CPD-11253	CPD-11253 [ C12 H17 O4, tgt=86.09, overall=86.09 ]			(225.1103, 173.37)(207.10193, 153127.69)(208.10577, 22182.191)(209.11076, 2604.3684)(226.87561, 40534.156)(227.12767, 22161.166)(209.5057, 6972.0537)(211.36845, 5190.7427)(244.53673, 61050.336)(245.5406, 193115.0)(246.15208, 328722.06)(225.96404, 13612.506)(226.14412, 8348.79)(227.137, 6616.53)(250.85754, 9651.035)(251.1118, 5997.67)(232.2267, 8595.8)(233.03897, 13886.983)(233.0978, 13911.26)	19.3825
CPD-20260	5983003	5127115	6631183	6044312	5206925	1	5542865	1	3494508	1	1	1	1	1	1	1	1	1	1	1	6247934	1	14289019	17670548	6084234	1	1	1	13692705	1	6487855	1	CPD-20260	CPD-20260 [ C12 H16 N2 O6 S, tgt=40.86, overall=40.86 ]			(300.06366, 3444.0674)(301.07172, 5227.825)(302.07434, 725.61005)(336.4951, 54355.4)(338.18707, 25514.477)(339.11252, 6403.9624)(340.112, 190.06)(318.09637, 6283.281)(320.09836, 3636.6301)	15.8138
20A-20B-DIHYDROXY-CHOLESTEROL	5857354	8593127	64334436	6296890	12500200	44458992	29400084	10460180	21979990	12084304	1	20307240	3204893	20585080	13660741	17913768	25884396	20501784	17677148	22242964	24781384	13615864	6331575	6003034	1	17692892	17943642	26296642	6024742	1	11522446	9416402	20A-20B-DIHYDROXY-CHOLESTEROL	20A-20B-DIHYDROXY-CHOLESTEROL [ C27 H46 O3, tgt=61.31, overall=61.31 ]			(418.69272, 4675.663)(421.5543, 14916.279)(421.85156, 6782.693)(424.3632, 29117.03)(401.19516, 9169.966)(403.7473, 4437.63)(404.68027, 1662.1367)(404.3521, 1696.7)(405.3542, 1013.64)(406.3507, 1507.31)(419.35007, 30984.78)(420.35245, 9401.172)(401.47192, 6614.4326)(402.53564, 2166.245)(403.85727, 1203.6438)(438.9283, 10940.3545)(440.38916, 695.155)(420.45047, 10331.423)(422.6331, 3411.4802)(443.3…	28.7379
CPD-20261	2809932	3682476	3815869	4106078	3934125	3938286	3547911	3644813	3803467	1692525	2575467	2763252	5610071	2425656	4022925	4870514	4920065	6591839	1934967	5409490	1	1	1	1	1	1	1	1	5849709	1	3570519	1	CPD-20261	CPD-20261 [ C12 H14 N2 O6 S, tgt=80.76, overall=80.76 ]			(299.05524, 9467.1045)(300.05893, 1343.23)(333.0926, 647.79)(334.0922, 485.845)(314.07886, 209581.19)(315.0828, 41286.066)(316.08527, 5743.5137)(317.0878, 425.27332)	22.4122
CPD-20262	2809932	3682476	3815869	4106078	3934125	3938286	3547911	3644813	3803467	1692525	2575467	2763252	5610071	2425656	4022925	4870514	4920065	6591839	1934967	5409490	1	4425300	5230736	7681566	4859463	6061222	4702753	2536288	5849709	7057758	3570519	7800243	CPD-20262	CPD-20262 [ C12 H14 N2 O6 S, tgt=80.76, overall=80.76 ]			(316.0539, 61447.375)(317.05655, 8648.905)(318.05957, 457.775)(299.0553, 10107.059)(300.05902, 1353.8175)(333.09198, 1263.3992)(334.09097, 427.1971)(314.1439, 211255.8)(315.0829, 44551.434)(316.08542, 6331.756)(317.0875, 362.48636)	22.3533
CPD-20263	343904	628330	576621	237045	1	254077	354092	240205	677766	1	1	1	3724538	1	1	1	1	1	1	1	301358	1	513428	196407	1	1226400	1	1	190313	1	1	1	CPD-20263	CPD-20263 [ C12 H11 N2 O5 S, tgt=59.79, overall=59.79 ]			(298.0401, 710.45)(278.0375, 3010.88)(279.0352, 435.81)(314.4993, 1454.8679)(314.07294, 344.68402)(295.13248, 8939.635)(296.06415, 1360.0728)(297.0764, 218.73)(301.0192, 466.48)	8.78391
CPD-20264	343904	628330	576621	237045	438924	254077	354092	240205	677766	1759039	2911994	206007	3724538	246938	1	151642	464525	1	788861	3736061	301358	154631	513428	196407	320160	1226400	1	14973022	190313	231442	189986	297112	CPD-20264	CPD-20264 [ C12 H11 N2 O5 S, tgt=59.79, overall=59.79 ]			(298.0401, 710.45)(282.53305, 1644.94)(296.71518, 2019.3633)(299.0468, 54311.71)(300.0483, 18228.35)(278.03687, 6032.3633)(279.0352, 435.81)(314.24475, 2558.5627)(314.52853, 567.9809)(315.0689, 296.15)(295.2835, 8844.929)(296.31458, 1441.1315)(297.0764, 218.73)(301.0192, 466.48)	10.7198
CPD0-1373	332711	299720	341937	388209	352624	378280	421756	362052	322277	231626	228860	368492	344983	269778	347608	320219	1	202780	208400	338304	354525	452428	399424	437355	397059	345592	385707	377594	376790	587822	447503	728244	CPD0-1373	CPD0-1373 [ C7 H10 O9 P, tgt=37.27, overall=37.27 ]			(252.99788, 9006.199)(252.0051, 552.87604)(269.03137, 6046.423)	20.9407
CPD0-1375	125582192	112207328	14292196	138749648	113231520	104108128	110456944	98169560	143146544	65117776	13789639	131623304	102749672	15585132	95706688	74174656	27579986	108502848	100723152	36755756	20932614	16646826	18610360	98577904	8588820	96990880	96346024	21928814	89386288	94930872	65591432	99606352	CPD0-1375	CPD0-1375 [ C18 H33 N7 O3 S, tgt=66.46, overall=66.46 ]			(427.28174, 4772.9985)(413.7327, 6570.909)(414.23056, 2562.8132)(414.2338, 7873.76)(431.15634, 7885.9043)(429.24765, 2756.6501)(410.3993, 26226.783)(411.574, 3240.9392)(414.2375, 3509.6501)(448.37604, 5639.332)(451.2711, 2140.2566)(430.06857, 11434.486)(431.1666, 29942.488)(432.26257, 67994.43)(433.15714, 21453.082)(433.26358, 15675.067)(450.95242, 19013.014)(452.82104, 1634.638)(434.72995, 98435…	11.7947
CPD0-1376	696028	938742	827277	792452	864064	962299	918973	922437	840001	705120	608580	850134	1014014	729867	951293	900037	884887	760574	660666	781245	559127	736386	640806	754473	805657	745602	674203	577316	655778	830930	757164	933236	CPD0-1376	CPD0-1376 [ C12 H24 N, tgt=87.30, overall=87.30 ]			(182.19066, 24045.016)(183.1936, 2941.8872)	12.8521
CPD0-1473	1263484	919675	1346995	1363424	1299727	1316425	1192072	1152494	1101453	488464	1043468	1103049	1127198	436243	1087005	1061501	1070393	1083252	842153	1207334	358850	438936	845513	575080	1576082	877974	949544	836617	296393	558242	427223	1261619	CPD0-1473	CPD0-1473 [ C29 H29 N9 O12, tgt=67.76, overall=67.76 ]			(695.1942, 18118.455)(696.19684, 7482.758)(679.178, 78170.43)(680.18115, 29590.762)(681.18335, 7325.065)(701.47205, 905.895)(697.2117, 1025.57)(683.4461, 772.8171)(684.2142, 508.95502)(714.2284, 12255.571)(715.23145, 3841.4978)(716.2398, 1491.9401)(696.67017, 1995.4402)(699.2244, 776.62506)(719.40955, 1845.1125)(720.1828, 430.07666)(703.1843, 148.55)	18.3616
CPD0-1471	387508	9360453	521998	4167983	6986539	4494894	3967816	4570226	5926512	3703591	2487187	458170	5058686	1	3872549	1	1	1	6829023	177996	913331	1	2412601	1732487	1382480	15785066	1064590	727149	1627089	1	19446912	317386	CPD0-1471	CPD0-1471 [ C7 H5 N5 O2, tgt=52.46, overall=52.46 ]			(193.0498, 481.81195)(196.0525, 151.16)(175.03835, 2301.01)(195.89192, 1335.9252)(194.0575, 213.07)(177.1398, 5350.2754)(179.0493, 1741.68)(210.38254, 135835.36)(211.08517, 20422.773)(212.58975, 1676.655)(195.0758, 942.7294)(192.074, 361.97)	14.5834
2-FLUOROBENZOATE	382356	550291	550481	433377	464666	599965	504733	353478	717293	529874	425139	423824	615778	467689	459176	580488	394424	813163	533235	505611	546686	632661	803984	640625	642508	858064	1089630	640316	757439	791803	1074607	835464	2-FLUOROBENZOATE	2-FLUOROBENZOATE [ C7 H4 F O2, tgt=70.99, overall=70.99 ]			(141.1254, 8546.799)(142.03195, 166.75198)(160.05925, 2942.9365)(140.73546, 2133.5999)(167.0218, 4289.94)	6.25297
CPD0-1474	10357944	8666017	13603518	14401956	13318728	17415782	15674752	14785122	16187497	3440067	3465183	12651844	11184902	2580228	14065488	12971761	5742941	6524067	8662477	15250352	3583531	3622261	4333274	1607916	4299734	2014622	2731002	3670396	1746097	3325035	4036137	4875976	CPD0-1474	CPD0-1474 [ C25 H29 N8 O9, tgt=79.40, overall=79.40 ]			(586.8065, 14936.611)(587.81055, 3653.7542)(588.0123, 728.33)(567.6764, 25464.98)(568.7206, 24200.021)(569.90875, 7375.966)(573.2163, 367.86)(588.62384, 1247.186)(569.20984, 11061.073)(571.461, 2765.045)(572.2154, 5199.4834)(573.2229, 3074.87)(604.93994, 6948.043)(607.7523, 3857.3872)(608.75494, 1559.3301)(586.1547, 7681.695)(587.23474, 1395.7781)(590.2456, 582.88336)(609.5878, 10537.509)(610.953…	17.2345
CPD-825	1298183	1016472	1157160	1082894	1049114	1028718	1	1176318	1	1218821	1225836	66189760	1	136177648	1563560	60357456	80922960	76140080	183928992	113776152	94114560	83315160	139017184	132306816	96200064	99798472	75271232	1107374	129257440	1	58516752	53535020	CPD-825	CPD-825 [ C5H12N3O, tgt= ]			(130.49133, 771390.06)(131.43463, 71891.25)(112.087135, 146250.64)(113.09047, 11195.016)(117.10416, 4548.0127)(150.46823, 8609.396)(130.12161, 26727.855)(153.98172, 40317.617)(157.59863, 160711.97)(158.0995, 24069.84)(138.3872, 4720.0625)	9.10017
GERANIAL	28742788	19383350	33366632	30766870	25053876	41939424	5483626	38971124	23743380	18884688	233708656	22412162	26431058	31370604	50659440	18153860	23169392	20242626	40692552	30712618	30887080	35061612	57819092	45700384	32669060	39423064	38641088	36654464	49653016	48366680	28233452	51800328	GERANIAL	GERANIAL [ C10 H16 O, tgt=87.92, overall=87.92 ]			(154.45976, 37610.203)(153.12755, 1034701.8)(154.16592, 131761.69)(155.1279, 10721.057)(135.49312, 378917.56)(136.11966, 49875.242)(170.15385, 1838.085)(152.14345, 4175.315)(175.32597, 280887.28)(176.11105, 332031.34)(157.09753, 979185.25)(158.10031, 34239.215)(159.0948, 23251.148)	12.0524
CPD-15332	2060750	1123794	2405092	2452602	1397140	741312	1532061	2033101	1	5319813	3706595	2098817	1606850	3801676	1494361	853696	2203392	1	3846603	1748113	1797451	679074	1345486	2119901	758046	2109061	1403182	344445	1490235	1212360	730556	1416749	CPD-15332	CPD-15332 [ C5 H4 N4 O3, tgt=86.01, overall=86.01 ]			(170.89009, 881.4171)(171.0316, 500.98)(154.0261, 331.34)(172.0411, 645.8)(173.0435, 1333.99)(155.0348, 109.88)(187.43173, 51447.203)(189.64932, 3432.3835)(168.3178, 11613.465)(169.36131, 1928.2728)(170.04857, 2729.2734)(191.0156, 29992.43)(192.0113, 33164.44)(193.0142, 1364.05)	3.15972
CPD-17604	3546913	1	8905796	3596921	1	4354929	6880121	6637176	1	1	1	4919483	3773139	3586156	5311570	1	8516067	1	3776254	15794587	7045421	10163376	11064595	12665839	5256494	1	4749184	10478268	9089040	9968107	3750229	22442330	CPD-17604	CPD-17604 [ C17 H16 O2, tgt=78.54, overall=78.54 ]			(253.52121, 5152.936)(257.1302, 541.65875)(254.1259, 7997.307)(257.1308, 518.79)(235.11177, 10071.337)(236.11777, 1683.5618)(271.30518, 30687.33)(271.13776, 1771.5801)(272.1432, 1236.57)(252.8482, 9521.945)(275.98322, 3464.5217)(277.10657, 4204.615)	23.8905
CPD-17601	3373460	3740937	40783840	23819052	4016117	2013191	4142060	3495229	37710532	1	4393968	41310608	4410181	43337624	37422056	1961954	1	39611564	5322896	1	17489040	1	3337610	12331403	11975805	2301203	11530037	2186673	1	10545924	10465772	9563031	CPD-17601	CPD-17601 [ C21 H24 O6, tgt=72.10, overall=72.10 ]			(375.1638, 15416.376)(376.66815, 6371.4053)(377.1729, 2684.29)(356.01788, 2738.2004)(358.6583, 3509.355)(359.164, 4978.61)(377.08582, 54254.0)(378.06967, 13965.842)(358.35422, 10914.08)(359.38153, 15774.053)(359.87982, 27968.236)(360.1668, 6055.95)(392.23535, 24112.67)(393.7662, 11205.519)(394.70428, 10593.471)(395.2062, 4831.962)(373.68552, 9018.224)(374.1872, 2238.01)(398.15558, 42176.84)(399.1…	10.5967
CPD-9677	9352759	9302038	12934970	13558642	13779198	16238179	12879746	13950484	13794160	2221629	2068237	11922386	11342589	9577654	11589408	10062389	5208855	1	1	14909305	18701470	4135008	1	1	5617996	3396308	3606392	1	6066891	1	17983696	26367212	CPD-9677	CPD-9677 [ C29 H34 O12, tgt=81.32, overall=81.32 ]			(576.0433, 35049.24)(577.12744, 17070.113)(578.2671, 4680.719)(579.2153, 3070.6785)(580.22266, 1490.82)(557.11786, 43000.863)(558.19965, 206081.4)(559.2037, 52723.79)(560.2078, 13689.229)(561.6809, 2034.9375)(562.21027, 231.28598)(575.52997, 12576.545)(577.2183, 8276.27)(578.2206, 1707.6)(580.2342, 2674.22)(557.86945, 62470.48)(560.2082, 129.37)(562.2116, 3860.14)(563.213, 281.81)(594.5785, 12587…	17.1838
XANTHOSINE	9705991	10767071	12158337	12315006	6304489	1	1	5848824	1	3359137	4181852	5450814	7146123	4185042	5697916	6038556	6091675	7910903	4650399	7488319	31220462	28219600	46440260	48525892	30183232	50402076	26512924	37156528	47851652	38902968	35938880	49025448	XANTHOSINE	XANTHOSINE [ C10H12N4O6, tgt= ]			(285.62997, 972158.44)(286.11987, 185540.64)(287.12234, 25800.172)(288.1665, 4110.736)(289.0882, 5454.9507)(269.744, 1947.7635)(304.21167, 220.186)(284.10025, 75511.164)(285.10184, 31698.086)(310.64557, 1664.4094)(311.07263, 5870.9146)(312.0746, 608.33)(289.05405, 4653.6504)	21.2204
G3P	355936	349664	449251	399387	422476	388525	299608	338669	341518	1	510557	278277	304281	622735	1	219708	666150	219924	720784	280904	234028	217869	241650	234029	187233	226174	208624	1	203529	232775	1	256008	G3P	G3P [ C3 H4 O7 P, tgt=45.46, overall=45.46 ]			(167.96478, 212.13118)(165.9669, 3942.15)(166.9693, 338.29)(167.9648, 1401.45)(203.92564, 640.5341)(204.5109, 150.26)(210.79243, 3059.9832)	1.18181
CPD0-1465	480394	961865	483965	429982	590272	394057	240450	277105	544352	630653	318040	206159	360371	162787	1	239816	1	311287	1	1	141830	1	117852	1	1	339139	155814	1	1	128909	140265	1	CPD0-1465	CPD0-1465 [ C11 H14 N5 O14 P3, tgt=65.96, overall=65.96 ]			(514.966, 2359.51)(538.9912, 622.30505)(519.78625, 898.92)(536.25745, 518.14246)(555.96326, 14555.181)(556.96686, 1304.1582)(542.9702, 678.2134)	1.45097
CPD0-1467	26700692	35625640	36566656	40467088	8172204	54571888	7855791	79471520	78091248	10319919	5276040	73613184	43031508	76257864	69482040	1	9081707	67819888	10344602	44930868	28658328	2832522	12151589	2277182	12968522	20749132	1	17946540	21984616	1	23487340	6514679	CPD0-1467	CPD0-1467 [ C7 H9 N O2, tgt=78.51, overall=78.51 ]			(141.11214, 6024.6704)(142.06892, 318.9809)(121.05085, 174183.38)(122.05531, 11466.853)(123.05603, 506.41797)(140.07043, 7165.852)(141.0667, 171.435)(126.03297, 9128.501)(125.734314, 358.1)(157.0975, 1114853.5)(158.10046, 44066.48)(159.09467, 38073.44)(140.12532, 9548.911)(162.85425, 1473.3518)(163.06, 196.02)	19.0824
STERCULATE	2264139	3706693	6066441	1878958	1316449	544279	1244973	1247503	1679663	847221	915595	559336	3971398	1969336	1	2798345	1948262	1175643	3171816	3702254	1049577	2189007	3513714	1442921	276099	2657753	1100665	1342953	840893	534115	1273851	2417780	STERCULATE	STERCULATE [ C19 H33 O2, tgt=58.51, overall=58.51 ]			(296.29373, 40294.01)(297.30096, 11126.188)(298.26547, 4127.022)(278.24695, 8391.973)(279.75055, 2004.3627)(280.2514, 1782.09)(297.09692, 59086.26)(297.26144, 37218.246)(298.77066, 9144.46)(299.2742, 4292.42)(278.46368, 164510.5)(279.25073, 37803.848)(280.25848, 7925.613)(317.2433, 22686.377)(319.6647, 33225.2)(321.2559, 191.02)(299.2336, 1689.25)	23.2779
CPD1F-461	129958	1	217454	159993	420799	157112	133361	542029	484326	121346	109196	279129	422868	500800	423937	490458	443992	1	284676	433887	1	291181	1860204	649337	1054779	2171423	208687	213374	281924	1	1	1	CPD1F-461	CPD1F-461 [ C21 H19 O10, tgt=59.53, overall=59.53 ]			(431.09708, 693.8743)(433.1129, 2667.005)(434.11545, 865.39716)(416.43942, 1084.9333)(419.1139, 623.85)(452.25726, 9276.49)(453.14297, 701.40356)(454.58078, 809.5772)(434.2923, 971.9661)(436.13467, 458.805)(456.5227, 2064.1287)(460.10855, 2781.915)(441.08545, 2149.55)	15.2631
CPD1F-462	2083048	3781856	2097388	1597884	2422802	3225864	1	2610955	917278	673778	1141162	1	1868687	2221241	543064	2384296	1	2418145	2551454	1581008	4084034	4462285	4560312	3205538	3839042	5206007	4569918	4536479	3547413	4043578	4155997	3097390	CPD1F-462	CPD1F-462 [ C27H30O14, tgt= ]			(579.1697, 200.95)(564.1671, 980.61)(563.1543, 3698.13)(565.1666, 2179.44)(581.4056, 47988.176)(582.44885, 30971.559)(583.18726, 15889.8)(566.3717, 584.866)(566.671, 780.94495)(567.1717, 1261.31)(596.19727, 80212.99)(597.2011, 23761.375)(598.2012, 9114.94)(599.1969, 2144.8406)(600.1903, 370.815)(578.91125, 6317.246)(579.1696, 119.25)(605.8656, 481.49103)(605.1654, 1047.7)	15.0272
CPD-16876	3337874	288035	1971776	19067250	27340304	1	30448684	23440008	10266820	24881920	17612196	15891008	18884944	17944924	7346187	1245902	3340577	1175740	19150840	1	19840498	8843493	19520792	30702536	1004345	7754382	22783624	2871520	13957558	11739318	10363121	30888436	CPD-16876	CPD-16876 [ C5 H6 N O4, tgt=73.03, overall=73.03 ]			(146.03581, 7690.2573)(148.0362, 239.77)(127.0215, 10451.14)(146.49422, 8762.278)(129.53333, 31580.057)(130.79507, 3851.4119)(165.66447, 30543.715)(166.741, 16056.926)(166.93196, 5385.643)(146.32446, 8439.989)(148.11688, 13669.746)(149.06421, 1046.105)(170.60738, 1207.9705)(171.02914, 1303.9349)(153.01846, 833.50336)(154.0212, 111.47)	2.94297
TETRAHYDROPALMATINE	7485651	7819802	5757349	10747252	15968445	16016867	17296446	9008905	13699809	6130522	3918794	13603494	14219949	1	10977829	7120960	1	8291407	1	10820043	3011528	6850041	6893907	7583897	6688927	5262137	6915741	6348344	7771107	10190277	8662106	11376942	TETRAHYDROPALMATINE	TETRAHYDROPALMATINE [ C21 H25 N O4, tgt=63.45, overall=63.45 ]			(355.64886, 82523.88)(356.1805, 45149.28)(337.16702, 14028.968)(338.17398, 3759.6577)(357.52347, 10966.421)(359.64062, 15650.027)(359.1984, 22507.44)(340.51477, 9981.882)(341.4039, 10598.207)(341.1821, 5774.8647)(375.56665, 10914.749)(376.8106, 5750.1963)(377.2207, 5479.212)(356.68747, 12537.554)(359.339, 15612.19)(360.21664, 18236.309)(378.9865, 5062.997)(380.92526, 5262.9985)(381.62094, 4174.83…	8.21753
INDOXYL	1257736	185351	173483	195574	1	260309	295920	288852	1	1	251323	802041	916884	732235	1003323	633417	1	1	173927	1	405973	1	1	1	1	1	1514560	1	1294542	1824339	1105817	1	INDOXYL	INDOXYL [ C8 H7 N O, tgt=73.63, overall=73.63 ]			(136.00826, 5179.5054)(137.06386, 3380.1267)(135.26364, 14059.046)(135.86142, 983.50195)(120.0621, 25089.51)(121.0646, 133217.61)(153.25809, 1398.2676)(155.0953, 308.21)(133.91248, 2450.6455)(138.0916, 19836.6)(156.04227, 20186.521)(157.04663, 1232.0345)(158.04028, 2072.463)(140.92796, 2939.9446)	3.25741
D-THREONINE	1014863	1	1916950	2026743	1	1	1	1	1	1	1	1	3887752	1	1	1	21854188	1	1	1	1	1	1	1	1	1	1	1	3342578	1	1	1	D-THREONINE	D-THREONINE [ C4H9NO3, tgt= ]			(122.0638, 2212.48)(104.0531, 117097.84)(105.0563, 5986.39)(120.73359, 9994.374)(102.054985, 45540.895)(103.05713, 1670.4261)(104.0509, 669.07)(121.58726, 2612.675)(123.091446, 2827.605)(145.55505, 2575.105)	1.47754
AMP-GROUP	4997136	3680967	7161480	5747942	4023986	4286529	4494315	3949175	4444022	1846452	3259194	4530730	3931700	3420698	3662876	2954621	5123521	3552435	3517437	7412167	9932221	10135106	10887525	10908032	7128612	7692151	8586382	8281012	9964196	11259261	6679978	9788873	AMP-GROUP	AMP-GROUP [ C10 H12 N5 O7 P, tgt=84.47, overall=84.47 ]			(331.04523, 17566.771)(332.04892, 2987.959)(346.06912, 10198.088)(347.07245, 1636.9844)	18.9362
CPD0-1458	754785	1	782360	756698	1	868248	1	799643	1	1	1	1	1	1	1	1	1	971573	1	1	1	1	1	1	1	1	1	1	1	1	1	1	CPD0-1458	CPD0-1458 [ C3 H7 O5 P, tgt= ]			(159.0158, 51.54)(157.01396, 833.165)(173.03937, 283.135)(174.0404, 462.69)	2.41947
D-GLT	1348489	1905994	1	1154980	1	868343	1	741272	1448512	1	1	873356	818500	3401285	1009587	563321	1143933	1401562	5475846	535431	988659	631842	855594	999667	735707	1358713	1166437	706958	768797	2333687	1	1	D-GLT	D-GLT [ C5H8NO4, tgt= ]			(147.31375, 9900.8125)(148.04915, 125.14)(130.37221, 8552.925)(130.0383, 10449.18)(150.45926, 38354.695)(133.05, 4416.867)(166.26675, 1543.8745)(167.08537, 865.9279)(149.87634, 19628.525)(150.32701, 12006.122)(171.0403, 93.945)(156.0335, 84.31)	1.96706
2-METHYL-BUTYRYL-COA	509771	544765	1012153	317646	1	1	1	1	536716	1	1	1	1	1	1	1	1569343	633206	513264	1	1	1	1	1	1	1	1	1	1	1	1	1	2-METHYL-BUTYRYL-COA	2-METHYL-BUTYRYL-COA [ C26 H40 N7 O17 P3 S, tgt= ]			(851.1395, 55.83)(836.1473, 865.0733)(865.42957, 6057.3687)(866.18207, 2430.9172)(867.1831, 272.87)(868.1954, 103.46)(847.1665, 391.25)(848.1705, 93.92)(871.132, 101.69)(873.1339, 110.44)(874.1376, 248.49)(856.8789, 552.77747)(856.1289, 6577.69)(857.1286, 8442.99)(858.127, 2851.49)	14.1959
S-COCLAURINE	2348395	1	2693505	1604351	1	1222932	2924511	2403962	1659024	1	1	1215334	1	891678	1521571	630673	1	724566	1092526	2912952	1	1	1	1	1	1	1	1	828315	3107049	954233	3551873	S-COCLAURINE	S-COCLAURINE [ C17 H20 N O3, tgt=86.17, overall=86.17 ]			(286.1461, 11259.434)(269.23596, 2045.2379)(270.1424, 2658.52)(289.44504, 6973.9985)(290.15878, 23035.488)(269.91553, 8291.132)(308.28064, 4768.719)(291.185, 34542.59)(309.13275, 20057.447)(310.1364, 4013.1533)(311.1348, 232.91)(291.12326, 76797.33)(292.12607, 14931.844)	14.6771
CPD0-2060	4271689	3140206	1122222	2685379	3726351	723132	1234538	6478394	3651873	628276	1765577	1	1221018	535278	899370	1604663	5980872	2700303	5026915	7634516	7110616	4946959	1	1	1	4929654	5147947	3680761	965962	6112296	6808472	8317145	CPD0-2060	CPD0-2060 [ C5 H8 N6, tgt=68.85, overall=68.85 ]			(154.30568, 5802.0874)(155.08414, 4556.317)(153.08888, 4296.9756)(170.29544, 185715.48)(176.07077, 71300.61)(177.07336, 3639.161)(179.07498, 1216.8375)	24.7576
CPD0-1449	1	1	1968991	2922916	8137910	1050829	1428406	3234171	3863402	5979422	5188074	4196002	9109995	16092891	3316849	9256453	10823001	9007630	14478547	9682167	1528518	1783417	349488	4295956	1	12412243	10394368	1847489	2888741	1906774	5414140	7675497	CPD0-1449	CPD0-1449 [ C9 H12 O2, tgt=82.76, overall=82.76 ]			(154.504, 432669.62)(138.19653, 5007.2646)(139.08801, 5064.7983)(153.20201, 10426.326)(156.1011, 76234.94)(135.08026, 18644.592)(136.08119, 2176.9587)(137.0721, 587.8225)(170.11742, 213485.8)(171.11722, 80189.7)(152.10684, 91567.55)(153.4908, 7661.9497)(154.10226, 8190.7295)(175.0746, 52001.6)(157.06383, 11704.062)	21.4931
CPD-15319	2339458	1244459	3247017	3483001	1024062	739883	1013888	3340255	3826427	4045303	3613119	1	1	730627	1	1051663	1	650652	2998358	1	2470946	882570	2306305	1	1547788	6656740	1	3031316	2178507	1	1119197	2845393	CPD-15319	CPD-15319 [ C6 H10 N O5, tgt=51.29, overall=51.29 ]			(178.05904, 6152.64)(179.0629, 967.78)(162.7231, 216.62335)(179.06876, 3220.9)(160.13371, 2861.97)(161.72623, 4304.37)(194.6333, 12047.5625)(196.31508, 3024.2524)(179.18097, 31801.754)(180.67262, 8747.663)(185.04466, 1240.778)	18.8863
CPD-15318	434903	454947	533726	638605	745555	444422	291914	1	395508	1	1	347461	1	341307	320969	345284	1	1	579035	204375	226396	282464	215226	1	1	1	1	1	378010	1	434132	683000	CPD-15318	CPD-15318 [ C5 H9 O8 P, tgt=47.58, overall=47.58 ]			(213.8002, 4441.731)(247.60515, 1421.555)(249.96703, 4370.429)(250.71245, 1211.82)(228.02669, 2454.1785)(229.03406, 1106.155)(230.0441, 179.83)(252.99786, 12070.566)(233.9873, 964.63)	4.04894
DODECANOATE	26874932	22609150	24485870	25098004	23077598	22877544	13889971	9979057	7172523	8132106	5220741	12106495	12601997	6200250	8384530	9842391	8643804	8651703	6324806	10212452	7466332	6795480	9306013	9778561	9920132	9927984	8982466	8319291	7816816	4716188	10941048	11087350	DODECANOATE	DODECANOATE [ C12 H23 O2, tgt=69.76, overall=69.76 ]			(199.16951, 447237.84)(200.17184, 71495.8)(201.16359, 43180.55)(183.50018, 1990.4266)(219.20943, 2712.3599)(220.2107, 1098.84)(224.66882, 6937.4546)(227.1743, 5004.1636)(206.15518, 1140.5685)	25.924
CPD-2461	6556366	19254252	6023232	9580144	4727213	1914926	9311926	6848734	11992773	3117348	6446355	2538306	8313385	11405451	6821119	8888149	6192651	9765702	23698038	6478868	6237700	7028729	8157557	8213317	8553572	9022691	7715648	17888108	6802956	6815780	15785691	4802240	CPD-2461	CPD-2461 [ C5 H6 O4, tgt=99.45, overall=99.45 ]			(132.43192, 5346.87)(134.0364, 63.54)(131.03494, 2212.6465)(113.02362, 864.12646)(148.06056, 63550.53)(149.06418, 3891.4934)(150.07271, 349.3343)(130.0498, 380815.72)(131.30339, 17449.645)(132.05411, 598.65)(155.019, 320.44)	1.40169
CPD0-1437	2116242	1248525	2978976	1519904	1079561	1402774	1761622	1439366	1249918	424930	347513	967953	2933422	1857307	1939283	958894	1	3968108	1555452	2666410	5054963	6630710	8443037	9712670	6650326	12405564	9182241	5329410	8308112	7659086	8148579	7836594	CPD0-1437	CPD0-1437 [ O2 U, tgt=49.31, overall=49.31 ]			(272.04236, 2107.7566)(275.05505, 7749.6147)(289.31223, 6429.9033)(290.0783, 1969.5471)(291.0791, 215.33499)(271.0606, 197417.3)(273.735, 3067.2588)	15.8316
CPD-15377	2494747	3396734	3353129	4200445	3747681	3427981	1	1	1	315455	2146866	2507197	1	4738577	2932435	4224942	1	2850272	2718741	2456310	2265971	1	1	1924532	1	1	2315888	1590971	3608268	4833916	1	1	CPD-15377	CPD-15377 [ C5H10O5, tgt= ]			(152.10507, 29952.215)(153.06071, 2731.815)(133.92029, 470.70374)(151.06093, 14977.264)(152.0658, 6488.58)(133.9086, 3104.8489)(134.0466, 76.27)(171.42917, 5105.4175)(172.31947, 6587.761)(150.07574, 22059.215)(176.25087, 175.92)(159.8434, 495.55093)	2.23047
CPD-864	19271800	1487259	7744337	17374264	1178164	7259174	18826992	1	1	1	11936328	15506101	10653702	16723688	7633747	11467467	13635245	12275549	7775384	8805865	6819311	5876853	5397037	6189728	8154964	8551248	3206260	4523045	1	6924038	7924694	1	CPD-864	CPD-864 [ C10 H14 O2, tgt=98.65, overall=98.65 ]			(168.06476, 35894.465)(167.2314, 24224.24)(149.0954, 40707.797)(150.09932, 11215.597)(151.0956, 323.85498)(184.13173, 92628.836)(166.12277, 171650.27)(167.9694, 5284.952)(168.13876, 672.63)(189.09035, 36204.168)(171.0792, 3960.8105)	26.8706
CPD-15371	921318	1160381	1043463	490323	178301	652718	849368	162175	1155023	288266	133737	832071	158564	124750	148264	411839	142042	1220208	104041	693895	636599	1	437117	334949	1	718516	664811	249978	145686	524522	287445	339454	CPD-15371	CPD-15371 [ C45 H46 O27, tgt=79.16, overall=79.16 ]			(1005.2329, 179.6)(1023.2363, 5383.2876)(1024.2396, 2938.45)(1025.2426, 584.7143)(1019.2437, 8158.072)(1020.2475, 3933.418)(1021.2489, 1338.6814)(1023.2748, 114.26)(1045.2098, 1826.1675)(1046.2125, 931.3037)	17.4484
CPD-15370	350149	1	297743	382920	1	1	328352	371608	274379	1	1	1	1	1	1	1	1	1	1	1	2136244	1	2593188	1	1	1847025	1	7476675	3192954	1	1	1	CPD-15370	CPD-15370 [ C41 H66 N7 O18 P3 S, tgt=50.33, overall=50.33 ]			(1069.3429, 7373.87)(1071.9391, 2667.968)(1073.3405, 1115.8025)(1074.3372, 2065.42)(1054.349, 226.295)(1057.3469, 216.22)(1058.3525, 245.7)(1087.8789, 2231.0)(1070.3724, 4762.8345)(1072.2017, 3136.9167)(1074.0328, 1886.32)(1075.867, 558.4225)(1094.6772, 946.9544)(1093.3383, 331.59665)(1079.493, 390.92166)(1081.3157, 221.8)	11.6936
CPD-14609	16582677	7597026	1667930	10945002	8344722	8649193	7766771	7879097	1502757	3877772	1	1	1288314	8603236	4818361	1041248	6093898	8019054	8088829	3618186	6634325	1	6168302	5220009	7004022	1	6456633	6387260	1	5674367	1	1	CPD-14609	CPD-14609 [ C8 H16 N O4, tgt=65.76, overall=65.76 ]			(192.99393, 24036.93)(194.11751, 9938.677)(194.1179, 40445.13)(172.09676, 15667.11)(173.10187, 1652.6042)(174.0914, 65.11)(194.53204, 23087.154)(174.8108, 7815.197)(177.112, 4358.74)(209.66801, 51426.72)(210.31273, 17915.033)(193.13911, 10171.197)(216.17458, 15361.753)(217.10564, 41792.89)(197.25714, 2257.5715)	18.5622
CPD-15374	6617736	1	7646713	4575640	1	1	7788492	1	4526879	1	1	1	1	1	1	1	1	2034955	1	1	2772236	1	1	3952848	1771234	1	1	1	3422180	1	1	1	CPD-15374	CPD-15374 [ C6 H12 O6, tgt=86.73, overall=86.73 ]			(181.064, 1224.79)(162.95358, 2995.815)(164.56136, 1238.48)(166.06793, 5906.865)(168.0741, 217.02)(201.10397, 190662.42)(203.1061, 15261.43)(180.0866, 197905.39)(181.08939, 17316.023)(182.0812, 248.4)(185.04446, 3513.4976)	14.6717
CPD-15373	6617736	1	7646713	4575640	1	1	7788492	1	4526879	1	1	1	1	1	1	1	1	2034955	1	1	2772236	1	1	3952848	1771234	1	1	1	3422180	1	1	1	CPD-15373	CPD-15373 [ C6 H12 O6, tgt=86.73, overall=86.73 ]			(181.064, 1224.79)(162.95358, 2995.815)(164.56136, 1238.48)(166.06793, 5906.865)(168.0741, 217.02)(201.10397, 190662.42)(203.1061, 15261.43)(180.0866, 197905.39)(181.08939, 17316.023)(182.0812, 248.4)(185.04446, 3513.4976)	14.6722
CPD1F-437	165302	127095	103202	172273	1	127637	153047	145376	112940	1	1	1	1	1	1	1	1	1	1	1	259414	184683	580587	256040	125517	463727	682866	529920	182941	306451	435401	678694	CPD1F-437	CPD1F-437 [ C21 H19 O12, tgt=80.24, overall=80.24 ]			(463.08707, 13217.685)(464.0911, 2577.5916)(451.09732, 106929.82)(452.1007, 21710.303)(483.1305, 1132.41)(488.71768, 2666.6462)(488.08868, 549.64996)(489.0854, 178.09)(468.0667, 800.39746)	14.6195
CPD1F-431	1681126	4273029	1	1504306	1	1	1	1	1	1	1	1	1	1	1	1	1	1	1	1	1075745	767621	1	1	1	1	1	1	1	1	1	1	CPD1F-431	CPD1F-431 [ C33H40O20, tgt= ]			(738.8005, 64445.574)(739.8041, 26944.7)(740.8084, 6917.6055)(742.2077, 2105.3967)(757.742, 8457.936)(758.75134, 11414.115)(759.2527, 5973.98)(780.21375, 5665.605)(781.217, 2326.1401)	19.5013
INOSINE	56332812	46686928	58465980	66026900	44777744	69474600	97699256	79786632	76481952	13792011	25207264	35993560	25574096	42051656	44227168	35452464	5857526	36294132	42751780	48415888	39828220	61510148	48624468	51740380	57909200	13084149	28525128	88345456	116988016	41521276	34931236	65867440	INOSINE	INOSINE [ C10 H12 N4 O5, tgt=97.35, overall=97.35 ]			(270.0826, 21005.277)(273.0955, 75.66)(252.07312, 2330.6978)(271.76288, 411.00665)(273.09656, 1788.1613)(274.09894, 424.49002)(253.0836, 564.53284)(254.0873, 39.7)(287.83496, 2385.7783)(289.5145, 1224.2225)(290.83832, 910.6886)(268.1048, 669218.6)(269.1076, 87410.9)(296.0821, 56.7)(276.66312, 8695.056)(277.3858, 26901.14)(278.07263, 3386.718)	4.23956
CPD-15382	6617736	1	7646713	4575640	1	1	7788492	1	4526879	1	1	1	1	1	1	1	1	2034955	1	1	2772236	1	1	3952848	1771234	1	1	1	3422180	1	1	1	CPD-15382	CPD-15382 [ C6 H12 O6, tgt=86.73, overall=86.73 ]			(181.064, 1224.79)(162.95358, 2995.815)(164.56136, 1238.48)(166.06793, 5906.865)(168.0741, 217.02)(201.10397, 190662.42)(203.1061, 15261.43)(180.0866, 197905.39)(181.08939, 17316.023)(182.0812, 248.4)(185.04446, 3513.4976)	14.681
MYO-INOSITOL	6617736	1	7646713	4575640	1	1	7788492	1	4526879	1	1	1	1	1	1	1	1	2034955	1	1	2772236	1	1	3952848	1771234	1	1	1	3422180	1	1	1	MYO-INOSITOL	MYO-INOSITOL [ C6 H12 O6, tgt=86.73, overall=86.73 ]			(181.064, 1224.79)(162.95358, 2995.815)(164.56136, 1238.48)(166.06793, 5906.865)(168.0741, 217.02)(201.10397, 190662.42)(203.1061, 15261.43)(180.0866, 197905.39)(181.08939, 17316.023)(182.0812, 248.4)(185.04446, 3513.4976)	14.672
CPD0-1422	3180677	18798182	23314312	75921392	39660308	28777858	22279886	14480623	18868072	7238190	7975145	11916190	28090410	14008783	16543534	10065909	21459850	23734962	12772748	17645032	8695672	1	30052608	10453746	4662726	25246484	2104261	3506386	3493351	1	21480344	1717671	CPD0-1422	CPD0-1422 [ C35 H67 O8 P, tgt=72.72, overall=72.72 ]			(647.96295, 8921.97)(649.135, 9613.624)(649.5649, 5680.358)(650.47064, 8502.532)(651.4654, 24264.88)(631.76227, 24549.197)(634.45917, 53692.133)(648.8291, 8225.933)(649.7482, 7134.3066)(649.4544, 1480.54)(630.3503, 34951.008)(632.46844, 115627.73)(633.4743, 140413.98)(634.4595, 88853.21)(666.197, 9201.275)(666.9942, 6140.529)(666.82904, 3901.8499)(646.64355, 63118.12)(647.7529, 40414.285)(648.770…	29.8169
CPD-3041	4642808	510769	12534428	4539685	3187680	4903014	7953515	8260074	5782125	1151225	2532767	1	1	3888404	5973393	2252803	9976213	1	4872760	19710532	9895649	11602546	12371392	15146398	7004571	3244020	5625921	12461680	10144779	14993644	7086428	26443428	CPD-3041	CPD-3041 [ C15 H12 O4, tgt=85.48, overall=85.48 ]			(256.074, 2669.5176)(238.06392, 878.833)(257.08142, 246660.66)(258.08505, 39784.633)(259.09113, 12156.263)(260.09607, 831.98)(239.07048, 58472.598)(240.07442, 9801.718)(241.08243, 1576.7511)(275.1082, 926.2737)(278.1189, 296.28)(258.1011, 158.81)	23.8884
CPD-862	28742788	19383350	33366632	30766870	25053876	41939424	1	38971124	23743380	1	1	1	1	31370604	1	1	1	1	1	1	30887080	35061612	57819092	45700384	32669060	39423064	38641088	36654464	49653016	48366680	28233452	51800328	CPD-862	CPD-862 [ C10H16O, tgt= ]			(154.45976, 37610.203)(153.12753, 1098558.1)(154.12944, 139733.27)(155.1283, 11350.327)(135.26013, 436548.06)(136.11966, 52135.047)(170.1539, 1641.0156)(152.14346, 4375.3257)(175.11142, 10374.263)(176.1096, 1943.14)(157.09749, 918488.2)(158.10034, 36302.234)(159.09521, 19084.434)	10.2109
CPD1F-420	2028858	1461729	3341464	2742174	2126747	1812095	1691712	1935353	2134157	728656	2980288	1	2910565	2322351	2241029	2136355	4564420	1667560	3955056	2871400	2026015	1807469	1769877	2201124	3684685	3187666	1655471	1194078	3318684	1019319	1082515	1465717	CPD1F-420	CPD1F-420 [ C27 H30 O15, tgt=98.57, overall=98.57 ]			(594.15826, 679.58954)(595.16583, 36920.117)(596.16956, 10452.993)(597.1726, 2498.3372)(598.17645, 264.76373)(578.2395, 40395.383)(578.4462, 21670.463)(579.1567, 7835.0303)(580.1592, 1015.14496)(618.1435, 1749.935)(599.1905, 194.87834)(617.81726, 3969.0068)(618.7252, 936.7147)(619.1549, 263.005)(599.13495, 2628.5398)(600.1378, 344.525)	12.2656
CPD-9693	365746	3634673	362038	314142	1	338752	397990	262419	3252488	1	895190	1	265134	1	1	317883	767295	393088	1	330781	267774	372938	337348	1	233648	5420651	1786060	443349	1	315808	1	428607	CPD-9693	CPD-9693 [ C29 H32 O16, tgt=47.60, overall=47.60 ]			(640.1838, 720.93)(618.15094, 2796.8042)(619.1556, 488.21167)(639.68, 678.34)(640.1838, 3652.43)(622.30383, 562.7475)(625.1845, 752.84)(657.47906, 1685.6174)(657.92676, 300.5957)(638.0182, 3584.7307)(638.7661, 940.9044)(641.2111, 108.64)(660.1643, 1159.6633)(663.1714, 765.36)(642.9972, 3533.962)(642.15247, 644.285)(643.1482, 154.47)	14.3856
CPD-9695	819070	946340	1552572	980864	1480189	1011414	1601670	1957861	1042249	363896	1608946	1678372	1062108	790495	1706115	989664	1	1	1	4021189	1	1239803	2814357	1719081	934613	1309146	1	765840	1173061	2030815	650098	2700168	CPD-9695	CPD-9695 [ C30 H36 O16, tgt=84.63, overall=84.63 ]			(653.9552, 983.0538)(657.2135, 13814.595)(635.63916, 2075.0342)(637.0308, 2960.4033)(655.98694, 2076.5095)(659.2186, 10001.24)(635.86896, 4112.2163)(636.928, 4157.77)(638.35803, 1096.7357)(670.2985, 36558.176)(671.30133, 10206.057)(672.3059, 1979.1414)(673.2351, 483.64)(653.99384, 10240.243)(653.22925, 3226.3975)(654.24, 981.3083)(679.4516, 63736.96)(657.68036, 11068.792)(658.18317, 3692.7627)(65…	16.5347
INDOLE-3-ACETYL-GLU	1	16968668	8648270	52023832	29106876	6124216	24248780	6422589	20785476	14102559	2672606	24851400	25903748	23495148	27216212	23972454	42545208	12602015	7540605	34420704	9537089	5352130	6999476	7354186	7717051	5068892	6229604	6284651	8296943	6337270	7001008	1854972	INDOLE-3-ACETYL-GLU	INDOLE-3-ACETYL-GLU [ C15 H14 N2 O5, tgt=57.44, overall=57.44 ]			(306.43466, 363.54333)(307.1012, 290.24)(285.97577, 1554.8655)(289.0914, 4189.26)(305.065, 11296.791)(306.10553, 2421.297)(285.92426, 21939.22)(287.34628, 15203.09)(288.09796, 2664.51)(289.0932, 2999.92)(290.1, 1951.09)(322.30615, 2398.772)(323.27386, 2032.5573)(324.1301, 968.37)(325.1324, 263.35)(303.52567, 1398.5494)(303.1038, 668.31)(329.53873, 2059.838)(330.09476, 183.29333)(309.70493, 19452.…	2.36281
CPD-16172	618577	3317398	295873	858706	594952	1725142	5993627	2141405	7844651	1	3851882	1096929	1248495	5315992	991277	572866	4977587	9058370	2126110	4745581	342008	659550	1172119	2863644	891357	911175	614932	932621	860135	3559471	3063097	784822	CPD-16172	CPD-16172 [ C7 H7 N O, tgt=76.09, overall=76.09 ]			(121.051094, 205207.14)(122.05306, 9961.06)(123.05146, 987.1039)(103.87659, 1795.02)(106.0505, 94.38)(126.57279, 6483.843)(127.0746, 842.89)(108.64707, 5308.647)(140.712, 18475.023)(140.55035, 8456.104)(123.491356, 9121.955)(124.08565, 565.64996)	11.3935
CPD-16173	3146073	3460548	2527630	3009722	4876046	4277707	7952106	5636662	5312561	855155	1525582	1505364	2499259	97081	3110753	4553766	31863222	3899879	2684871	1621890	3461392	6300409	3402882	3382461	4310278	2020504	2276566	6026510	5392277	3277475	2848430	2914810	CPD-16173	CPD-16173 [ C7 H5 N O, tgt=69.35, overall=69.35 ]			(120.97163, 72514.62)(122.49954, 5723.4873)(123.04616, 7575.4526)(101.45502, 5090.207)(123.0522, 10322.51)(107.04954, 2022.1224)(139.0773, 2203.5)(120.764565, 57101.6)(122.07, 19721.145)(145.03514, 3829.286)(146.0361, 4268.62)(127.02485, 179360.89)(128.02704, 25808.752)	2.07775
CPD1F-453	1104080	932769	1255032	1374594	894052	858302	1055545	941634	1134811	479925	500972	876775	734653	1000919	771577	678370	1	892908	1299886	2049247	1029430	1007403	1628909	1267648	1011686	1283449	1906213	1574226	1447019	1164285	1331025	1947083	CPD1F-453	CPD1F-453 [ C21 H19 O11, tgt=81.25, overall=81.25 ]			(447.09244, 41807.36)(448.09567, 9227.8)(449.10202, 2238.3103)(468.1312, 363.42)(451.12265, 2705.5046)(452.2511, 1047.085)(453.1342, 3361.55)(472.71408, 317.35373)(457.0821, 493.8)	14.1452
LUTEOLIN-7-O-BETA-D-GLUCOSIDE	10837599	10843646	12208772	12034977	7155785	7760307	7372987	7105744	7911237	7024429	8025726	8678855	8722717	6878066	6317248	5684236	1	10690425	5724004	10586738	8150700	8522603	13921152	12326657	6358360	15780888	15168980	10495938	9461548	11180043	10231601	12123617	LUTEOLIN-7-O-BETA-D-GLUCOSIDE	LUTEOLIN-7-O-BETA-D-GLUCOSIDE [ C21 H20 O11, tgt=99.66, overall=99.66 ]			(449.10822, 310084.6)(450.11136, 66767.1)(451.11395, 13514.944)(452.11688, 1559.0891)(437.1071, 2816.62)(472.14417, 654.845)(453.13345, 7253.595)(454.13782, 1320.115)(471.0899, 130851.89)(472.09314, 29122.13)(473.09564, 6078.0923)	12.9114
N-NITROARGININE	3941861	1470295	3319121	3283818	3978022	3421984	2497849	1674172	3755521	533847	1	3844316	4052935	3234871	1628137	1	1	3293900	1215464	4903064	854626	857305	4694872	6646103	5874485	4302685	1	5705665	6321150	1840493	4689574	5345058	N-NITROARGININE	N-NITROARGININE [ C6 H13 N5 O4, tgt=52.34, overall=52.34 ]			(220.57828, 1408.9938)(202.08687, 6832.7617)(205.59619, 3988.3398)(206.0976, 1382.28)(222.7956, 2018.5758)(205.02873, 6704.471)(205.60153, 2525.9626)(206.52055, 4230.3257)(207.104, 54.587498)(237.90831, 4071.1099)(238.12459, 220.56)(221.58833, 12051.411)(224.1301, 40047.18)(243.77667, 8400.431)(243.42455, 1296.5641)(224.38223, 40579.285)(226.41547, 835.2867)(229.0867, 78274.98)	5.75772
CPD-9699	1	1	22865456	14081753	27949572	27225420	6314520	10985616	1	1	12157941	4225316	3521074	2661311	10430836	5043428	7910276	1	4338310	4107501	10792643	10048769	11763626	7162761	7982882	1	10486293	11153046	8815863	2179777	5190626	4421347	CPD-9699	CPD-9699 [ C7 H11 N O2, tgt=75.17, overall=75.17 ]			(143.08435, 28309.959)(143.0853, 669.83)(126.57755, 3462.04)(142.70296, 17807.3)(143.08443, 4553.56)(124.07592, 13539.485)(125.0725, 1022.995)(163.12042, 10109.154)(141.2398, 35296.07)(143.09781, 645.774)(165.87277, 4690.423)(167.0782, 4968.38)(148.66284, 9230.716)(150.0661, 541.34)	12.0086
CPD0-1405	12124310	8803998	12870416	8748108	12253013	12756723	13230142	12551640	10061008	2074551	7198550	10516659	12134389	3712502	12849539	4066401	1	3549109	10849100	12101504	2658526	1	10749177	1	10687054	15090519	10565735	1	19671208	13044366	20946364	27884270	CPD0-1405	CPD0-1405 [ C14 H20 N6 O5, tgt=75.80, overall=75.80 ]			(353.14722, 910.095)(336.861, 13777.033)(339.14648, 117537.82)(353.15927, 1320.92)(336.4816, 37326.47)(336.1488, 16367.35)(372.0455, 45964.043)(373.1918, 14464.635)(374.44794, 17726.693)(375.19952, 7106.38)(355.57477, 9822.745)(355.9504, 7637.935)(357.1862, 9678.87)(376.80945, 11358.197)(377.81238, 1659.4355)(359.71445, 4344.707)(358.1193, 4815.37)	10.8752
CPD-15369	1	152423	202303	2840035	1464589	3491321	5878368	5525732	2418238	3119560	3124462	2801786	3544382	741217	1205966	971556	1997122	2631033	1207301	2654007	2546252	3040782	393441	1	1	1	960981	2218052	1499838	1778655	1502726	1628736	CPD-15369	CPD-15369 [ C41 H68 N7 O19 P3 S, tgt=34.37, overall=34.37 ]			(1089.687, 604.92664)(1090.9528, 1964.5061)(1091.3508, 548.265)(1069.6134, 19834.436)(1070.3379, 1123.0675)(1091.6077, 703.36)(1091.8523, 781.47)(1095.3843, 1874.53)(1071.9918, 2819.1582)(1073.5906, 2336.1418)(1074.3387, 1998.909)(1074.3383, 6746.34)(1106.3772, 255.31999)(1109.3835, 219.65)(1110.3955, 1034.78)(1111.3956, 464.17)(1112.3969, 1610.09)(1087.7085, 2829.3835)(1110.3308, 1435.07)(1094.0…	28.3633
CPD0-1408	15709453	23303888	21827640	19555746	20784790	24647260	30117470	27711198	23563612	17319500	10768816	18608410	25975922	20574360	29021684	24825836	12120793	23997088	18543998	21417806	18378318	26469592	1404025	28710548	36982272	25755680	1225256	1386621	27765124	1252222	989642	2031086	CPD0-1408	CPD0-1408 [ C8 H9 N O2, tgt=99.02, overall=99.02 ]			(154.70746, 5232.8105)(135.98114, 6091.6895)(137.3975, 4471.37)(138.0656, 1525.86)(152.07097, 553310.2)(153.07356, 52316.125)(154.07742, 1449.4299)(134.06075, 15124.928)(135.05806, 1640.26)(169.09691, 14964.159)(170.0974, 1635.63)(171.0949, 176.39)(153.79375, 34901.008)(178.0647, 5208.6)(156.04297, 121.619995)	6.90231
CPD-15366	1	2594655	3447433	559158	379803	907280	10802099	1	7418844	6076498	5043447	3886984	6873430	3957667	4945950	3461631	2782037	1965291	1	1	3216472	2210625	1	1222740	1	1	791437	1	1	1	666010	1	CPD-15366	CPD-15366 [ C41 H68 N7 O18 P3 S, tgt=52.06, overall=52.06 ]			(1073.3428, 3873.6108)(1053.6906, 344.99667)(1056.3418, 167.5)(1055.3436, 26.18)(1072.3674, 4496.97)(1055.8529, 262.5)(1058.8623, 787.74005)(1095.3842, 3118.15)(1071.3743, 427.44)(1098.484, 1105.0021)(1078.6143, 821.8628)(1080.34, 287.0125)(1083.3524, 2516.305)	28.1806
CPD0-1401	2707552	4336554	3176968	5293548	1	1411324	3008134	68722088	1493547	1	2880679	5661523	3527644	3185442	1570120	3577767	65347120	8110710	1	3103432	2046328	1393596	47400676	40829896	1	11156742	2128697	1664727	1663305	2358279	2484329	4393671	CPD0-1401	CPD0-1401 [ C11 H17 N8 O3, tgt=78.81, overall=78.81 ]			(312.02533, 16686.17)(313.15207, 62246.34)(313.6532, 9212.436)(294.26138, 2656.7815)(296.13956, 1306.4867)(311.5896, 17315.176)(311.5542, 7168.9873)(313.1536, 678.7)(292.94, 46810.383)(294.09042, 9570.106)(295.24734, 3875.868)(296.1496, 216.75)(330.4116, 34390.6)(332.18726, 7606.83)(311.32977, 13980.767)(311.88516, 10621.995)(312.17004, 4218.415)(333.48346, 15451.547)(333.1415, 6297.68)(315.37192…	14.8788
CPD-15365	24313270	35583328	34792196	20700570	29810366	22954830	1	21346028	1	14957744	1	1	1	1	1	1	1	1	1	1	13075426	14776770	21178180	16713549	13089419	26726984	25168292	10135175	10150864	17823640	13934796	21115534	CPD-15365	CPD-15365 [ C39H62N7O18P3S, tgt= ]			(1065.2861, 255179.67)(1066.2892, 141060.66)(1067.2915, 48842.742)(1068.294, 13333.021)(1069.2936, 3142.064)(1070.2948, 50.47)(1050.3057, 683.8505)(1051.309, 295.09616)(1052.3116, 154.51)	18.9997
CPD-15368	361713	383933	564207	694310	726134	8039814	16874092	17814834	2785934	10486752	14722242	9216869	9513224	8322550	15762672	12435621	3581221	2222882	10421600	8862355	9407764	9889296	3580896	996877	3230244	1136820	3526362	2691930	3328917	6015492	5203412	6126639	CPD-15368	CPD-15368 [ C41 H66 N7 O19 P3 S, tgt=70.34, overall=70.34 ]			(1087.1694, 1189.6128)(1090.0682, 766.6456)(1090.852, 734.195)(1091.3499, 122.51)(1067.4982, 2065.1096)(1069.3345, 145.23)(1086.353, 1749.4576)(1087.364, 604.9)(1088.3561, 414.78)(1068.3768, 36649.68)(1069.4142, 18398.229)(1070.3344, 635.04)(1103.3534, 26.03)(1086.9552, 1514.468)(1108.3235, 3432.1653)(1109.324, 1299.7616)(1110.3303, 594.4875)(1092.3158, 10888.715)(1093.4939, 2568.3928)(1094.3162,…	30.7443
CPD-15367	350149	2295292	297743	382920	2205225	5207656	328352	371608	274379	553485	810451	6781199	9967357	2184610	3051651	2532183	4907663	6616468	1493319	1045730	2136244	8391094	2593188	992414	1193819	1847025	1955885	7476675	3192954	4322096	1275466	4585185	CPD-15367	CPD-15367 [ C41 H66 N7 O18 P3 S, tgt=50.33, overall=50.33 ]			(1069.343, 10149.539)(1070.3295, 210.64)(1053.7272, 485.192)(1057.3423, 213.89)(1071.9178, 3232.8862)(1073.3413, 2380.9224)(1074.2272, 1947.1454)(1074.3384, 5027.94)(1054.6748, 408.81998)(1057.3469, 216.22)(1058.3525, 245.7)(1088.0837, 1713.9086)(1088.3561, 422.6)(1071.0867, 4103.178)(1072.2017, 3136.9167)(1074.0328, 1886.32)(1075.867, 558.4225)(1095.408, 4589.524)(1094.5374, 1862.472)(1094.3154,…	23.4671
CPD-15364	17915896	26498076	25748150	15149106	22094488	16814670	18527512	15682657	25745512	11060499	15963019	26334992	1657852	710613	1934038	3460596	4773808	21266308	1717293	26992968	5437584	1547715	15404321	12072819	1306925	1765371	18493120	3973054	681677	3803494	3006211	15521322	CPD-15364	CPD-15364 [ C39 H64 N7 O18 P3 S, tgt=74.41, overall=74.41 ]			(1029.6597, 253.72333)(1031.3339, 305.71335)(1032.3344, 95.78)(1028.9541, 453.41122)(1031.2125, 1464.2524)(1032.0908, 3226.6199)(1032.3416, 2227.04)(1067.4845, 959.18994)(1071.3268, 956.6701)(1072.838, 2360.51)(1073.3356, 1724.95)(1049.9014, 9713.104)(1050.9043, 16256.282)(1051.7325, 2047.6912)(1052.7711, 5280.3906)(1053.7714, 9202.833)(1054.6438, 7236.746)(1055.3074, 6835.097)	20.5062
CPD-3061	4642808	510769	12534428	4539685	3187680	4903014	7953515	8260074	5782125	1151225	2532767	1	1	3888404	5973393	2252803	9976213	1	4872760	19710532	9895649	11602546	12371392	15146398	7004571	3244020	5625921	12461680	10144779	14993644	7086428	26443428	CPD-3061	CPD-3061 [ C15 H12 O4, tgt=85.48, overall=85.48 ]			(256.074, 2669.5176)(238.06392, 878.833)(257.08142, 246660.66)(258.08505, 39784.633)(259.09113, 12156.263)(260.09607, 831.98)(239.07048, 58472.598)(240.07442, 9801.718)(241.08243, 1576.7511)(275.1082, 926.2737)(278.1189, 296.28)(258.1011, 158.81)	23.8884
CPD-15363	1286593	1	2441768	3516571	1	2028196	1	588341	1	1	1	1	1	1	1	1	1	1	1	1	874426	451002	1	1	1	1	1	1	1	1	1	1	CPD-15363	CPD-15363 [ C41H68N7O17P3S, tgt= ]			(1056.3563, 210.23668)(1057.3573, 477.82333)(1062.3604, 23.91)(1037.5544, 3902.516)(1038.3511, 2847.84)(1039.3478, 1793.89)(1040.3337, 408.72)(1038.3546, 6369.013)(1039.3524, 4061.17)(1040.3464, 700.255)(1075.3843, 329.88)(1077.3906, 197.19)(1080.0099, 1737.11)(1082.681, 1959.0468)(1085.3473, 2720.9)(1065.0187, 97.60999)(1061.3425, 34.55)	28.4571
CPD0-2099	2052842	848718	2671041	1298769	2139304	2274997	1332711	2199220	1128316	1	1	1948515	3240313	1736232	4043337	4261560	2324698	1202211	185222	2111575	3213852	3647364	2182914	3484777	3904382	3095886	1800611	1736836	2908190	3201503	1729044	3275760	CPD0-2099	CPD0-2099 [ C4 H10 O5 P, tgt=66.62, overall=66.62 ]			(170.77985, 1023.94)(171.53186, 782.37994)(174.0405, 850.29)(174.0407, 794.25)(156.0314, 21.93)(187.75583, 677.33997)(188.0553, 110.18)(169.18796, 65773.81)(170.05519, 8456.542)(171.05565, 273.5325)(175.008, 696.13)	6.89
TROPINONE	2858080	4390759	1	4093369	3634789	5383648	7222897	10084104	1	5469550	33868548	26616832	35885312	1	1	6848034	11760199	24554612	68156336	4646669	25108822	2566864	8541971	5058852	3087857	30678776	4669187	10593782	12105779	29797160	15723950	14058216	TROPINONE	TROPINONE [ C8 H14 N O, tgt=70.10, overall=70.10 ]			(140.10689, 445634.9)(141.10585, 63902.324)(142.10335, 15879.654)(122.09645, 18349.646)(123.09157, 1214.2875)(143.11908, 721.05005)(166.18164, 4797.354)(167.03445, 3919.5535)(167.10536, 4253.74)(148.02425, 6852.4053)(148.09631, 15540.595)	25.3458
5-O-METHYL-MYO-INOSITOL	3824037	4360199	1	4921106	1	1	1	1	1	1	1	1	1	1	1	1	1	1	1	1	1822392	1	1	5011165	1	1	1	1	1	1	1	1	5-O-METHYL-MYO-INOSITOL	5-O-METHYL-MYO-INOSITOL [ C7H14O6, tgt= ]			(197.33801, 1169.1025)(176.67068, 64137.875)(177.67427, 2325.4138)(178.07669, 79.78)(197.34035, 3333.7124)(215.12016, 57107.832)(198.1112, 130.78)(220.07776, 29636.766)(202.06763, 8994.078)	27.9803
INDOLE-3-ACETYL-GLN	25323448	29914820	50766440	21310460	24691908	22010612	12158253	21733514	20594708	16504754	1	27426186	33051768	44982928	17937802	24669078	11137061	15035538	1873239	34644096	1	1	1	1	12607958	5250168	2095750	2387651	13077706	3297831	12781694	3584201	INDOLE-3-ACETYL-GLN	INDOLE-3-ACETYL-GLN [ C15 H16 N3 O4, tgt=59.84, overall=59.84 ]			(304.22943, 1097.54)(284.7429, 6562.8247)(285.11218, 1126.9725)(304.62875, 5495.52)(304.1305, 594.34)(287.11752, 2848.362)(289.11935, 6155.8447)(322.78885, 4538.8726)(321.98636, 1305.8602)(322.1312, 311.95)(302.36456, 9628.234)(303.38727, 1252.8983)(329.1141, 1304.3942)(309.81564, 865.78424)(309.7656, 12259.284)(310.1043, 8973.97)(311.1035, 599.15)	3.59378
CPD-885	35173988	29827688	35215844	39338028	42309508	40877840	40410632	37052160	32230036	18410616	11222215	33247892	35083916	32627320	36097412	18620710	1	17590714	29225600	38175668	22541188	19545840	1	13078045	29687516	14856386	17200482	11540436	25394844	31920848	24020714	28548580	CPD-885	CPD-885 [ C20 H27 O5, tgt=83.61, overall=83.61 ]			(348.95383, 4216.0728)(350.1972, 1626.642)(350.1958, 1151.24)(330.11017, 302871.12)(331.18124, 50700.438)(332.18295, 11107.763)(333.2635, 591.7646)(334.19113, 145.96)(349.15408, 13994.513)(351.20218, 2934.081)(334.19574, 8225.218)(332.1867, 6594.15)(335.2015, 1317.3)(366.082, 501.22858)(348.07455, 3678.0134)(349.21106, 4353.1865)(350.2166, 59.01)(371.52365, 17220.064)(371.1749, 1560.64)(353.66925…	4.10756
CPD-884	306436704	1	244131392	312008128	1	289058272	287976128	297834752	289405248	263696288	352549024	297430848	1	1	1	1	1	1	1	1	274920320	1	1	234039920	1	1	1	285127360	5986659	6249855	1	1	CPD-884	CPD-884 [ C6 H13 N O2, tgt=97.62, overall=97.62 ]			(134.10034, 1589.655)(117.0926, 8753.46)(132.10187, 58643.668)(133.10173, 7661.699)(134.09682, 4548.4087)(114.09179, 7716781.0)(115.094635, 621929.75)(116.09758, 38028.965)(153.13832, 4600.728)(158.49333, 37271.07)(159.095, 13666.72)(136.07431, 11873.733)	10.3834
L-1-GLYCERO-PHOSPHORYLCHOLINE	5703798	1	1	5306771	1	1	1	1	1	1	1	5850251	3859207	1	2852815	1153136	18034740	8300150	1	3308035	7450117	2316156	3836735	4576320	1	3061391	1	2878732	3397742	4005428	3528119	4597509	L-1-GLYCERO-PHOSPHORYLCHOLINE	L-1-GLYCERO-PHOSPHORYLCHOLINE [ C8H20NO6P, tgt= ]			(259.1075, 828.33496)(239.73633, 82719.37)(240.56003, 12786.322)(241.49973, 4337.97)(242.0999, 163.89)(258.1105, 27011.275)(259.11392, 8275.52)(260.12164, 947.0419)(261.13, 62.76)(240.97733, 7924.6187)(245.1141, 3582.8)(276.8062, 1756.1836)(258.21393, 4776.1665)(259.13065, 4048.8657)(282.26608, 3655.2383)(284.35373, 2930.5774)(264.13928, 6040.685)(266.0892, 3691.8425)	8.32804
CPD-10051	28742788	19383350	33366632	30766870	25053876	41939424	1	38971124	23743380	1	1	1	1	31370604	1	1	1	1	1	1	30887080	35061612	57819092	45700384	32669060	39423064	38641088	36654464	49653016	48366680	28233452	51800328	CPD-10051	CPD-10051 [ C10H16O, tgt= ]			(154.45976, 37610.203)(153.12753, 1098558.1)(154.12944, 139733.27)(155.1283, 11350.327)(135.26013, 436548.06)(136.11966, 52135.047)(170.1539, 1641.0156)(152.14346, 4375.3257)(175.11142, 10374.263)(176.1096, 1943.14)(157.09749, 918488.2)(158.10034, 36302.234)(159.09521, 19084.434)	10.2109
S-RETICULINE	17846688	1	1	17057540	1	18084188	1	1	1	5938032	9737898	1	1	21872636	1	16076551	1	1	1	17518852	14733107	1	1	1	1	1	1	1	29985532	1	1	1	S-RETICULINE	S-RETICULINE [ C19H24NO4, tgt= ]			(330.1691, 1874.28)(312.1562, 324740.97)(313.15964, 53416.95)(334.187, 3889.102)(317.18, 25313.055)(348.8063, 17435.164)(350.54504, 5253.757)(351.2164, 9081.35)(331.19763, 45359.645)(333.4504, 4393.385)(335.2041, 3180.37)(353.86267, 8832.742)(355.83316, 4349.85)(355.1596, 188.94)(336.1497, 699.99005)	11.4713
CPD-19795	3839882	1	10446345	5992168	5404110	7338934	4396776	5472986	4502644	2697645	1	4416402	5228608	2095582	3922587	2874252	1	1	4120551	8315308	3024282	2876994	7264838	1826556	1	2531980	5807744	6318909	4062434	4543421	5399971	11430967	CPD-19795	CPD-19795 [ C28 H47 O8 S, tgt=87.64, overall=87.64 ]			(547.84906, 2610.2595)(548.8058, 28100.188)(549.3092, 41143.47)(529.6678, 32014.299)(529.29175, 22790.197)(528.2866, 13342.992)(545.80994, 1493.125)(548.3067, 109581.27)(549.309, 32095.57)(550.3104, 13699.69)(530.3021, 1588.6029)(532.3016, 6829.575)(562.60345, 2228.9705)(562.83014, 1021.82495)(567.3357, 280.84)(543.543, 19853.281)(545.32336, 12612.505)(546.32825, 6482.295)(547.3347, 725.8)(568.49…	23.0904
CPD-19791	19951128	5631826	10509919	13936505	11079871	8645010	19385128	10475100	13331259	1959605	3518971	14715124	14545803	15328446	15256750	6448887	23746558	34946152	12993658	13570457	8860987	7192378	78660808	84799272	7693022	63609568	7347819	5343403	6286973	84218760	60667728	1	CPD-19791	CPD-19791 [ C21 H29 O5, tgt=81.46, overall=81.46 ]			(362.82928, 32641.676)(364.14536, 7038.603)(365.21225, 1701.8)(344.97617, 181392.97)(347.00192, 24553.9)(347.2034, 8206.47)(348.2012, 15272.84)(362.3661, 27832.477)(364.21674, 8616.99)(365.2166, 3452.87)(345.15915, 95975.13)(346.20554, 20488.834)(347.7909, 6418.6113)(348.71198, 15772.393)(349.21005, 31383.45)(380.1598, 12458.239)(380.53217, 5389.529)(381.2239, 258.49)(365.2327, 4427.655)(388.1031…	10.2902
CPD-8141	1153390	173323	3128895	1044154	826937	1197248	1870234	1990464	1386421	307691	603002	1286471	1036595	871996	1378213	492381	2291936	466770	1094324	4819891	2214057	2549911	2654286	3478148	1644759	654190	1187820	2838441	2211403	3371026	1459311	5820450	CPD-8141	CPD-8141 [ C15 H10 O3, tgt=84.61, overall=84.61 ]			(238.06392, 1286.092)(239.07045, 80348.52)(240.07445, 13709.225)(241.08243, 2287.659)(221.0599, 15511.37)(222.067, 219.45)(258.1011, 222.33)(241.48946, 7406.159)(242.19522, 3114.2527)(243.10028, 2917.0432)	23.8884
CPD-19790	21292870	34348784	1	21590028	1	1	1	1	1	1	1	1	1	1	1	1	1	1	1	1	5850452	1	3297323	6532232	1	1	2643782	4825343	2126686	3106222	1	3227485	CPD-19790	CPD-19790 [ C26H37O4, tgt= ]			(413.66714, 401954.9)(414.6708, 117937.73)(415.67715, 33484.848)(417.286, 4825.8447)(416.2842, 27977.982)(417.28683, 6372.4136)(418.28854, 935.775)(396.26328, 9026.263)(418.22012, 4765.619)(418.3097, 38419.02)(419.314, 74936.89)(441.94492, 7110.654)(419.7544, 4850.7183)(423.26483, 4215.2197)(424.2703, 9189.42)	19.436
CPD-8144	1333516	910348	1331670	1230317	1144463	1268585	1209111	1148063	797511	368511	583044	881596	1036460	1013808	1152371	820888	1189400	800485	699876	1177847	444748	1969674	4336755	4627976	961416	741280	540233	768402	4026828	1	607778	1668776	CPD-8144	CPD-8144 [ C21 H20 O8, tgt=68.88, overall=68.88 ]			(401.19165, 24404.342)(401.12442, 7365.1274)(402.1272, 888.1687)(382.30646, 1984.474)(383.0993, 352.125)(401.1278, 10081.5205)(402.13394, 1709.3701)(386.94153, 9820.584)(384.9198, 1778.2141)(385.13565, 296.625)(420.62186, 45819.598)(420.15646, 14379.837)(423.1649, 2197.7)(401.4321, 3615.6138)(402.14258, 1577.2783)(403.8158, 23450.438)(405.1511, 75562.5)(425.06818, 1141.4485)(424.9081, 2518.034)(4…	13.2259
CPD-8158	8738206	21921822	4280377	4520941	14724665	12613855	547018180	585073540	1522429060	2064318210	1347496960	1286498560	418207744	1773584770	1215550850	945417280	1207479680	1062408900	1773018750	1779812610	190084816	1507214340	1103050370	1	479431136	165722864	1787368830	338111904	23840020	3977200380	1845458300	4436875800	CPD-8158	CPD-8158 [ C42 H80 N O8 P, tgt=87.67, overall=87.67 ]			(757.7013, 1415665.8)(758.8514, 751374.0)(759.7368, 239171.5)(761.5745, 11711.18)(742.2718, 24731.184)(743.95776, 56924.668)(745.5649, 37055.625)(758.7617, 3450089.2)(759.76434, 1589443.6)(760.5787, 809340.56)(761.5828, 201449.84)(762.57794, 20200.81)(742.875, 24847.053)(745.3648, 26043.215)(745.06665, 11480.689)(746.5667, 2346.49)(775.6839, 26816.627)(776.6672, 7372.982)(777.6128, 14324.83)(761.…	27.8883
CPDQT-299	1613560	2513501	2647376	2567725	3777208	2081286	2693459	1853046	2421967	7088497	6205693	2423856	2318105	1845147	1659993	2551689	1753286	2004104	1584471	5709332	1949308	1976043	4706949	2181415	2273783	6059187	6510963	5544488	2799481	2284325	2742483	1	CPDQT-299	CPDQT-299 [ C16 H30 N O10 S3, tgt=44.21, overall=44.21 ]			(498.43665, 1485.129)(499.1015, 1299.57)(478.0829, 3564.83)(493.2402, 6658.6045)(494.4506, 1180.5671)(475.10358, 25020.6)(476.10675, 5747.428)(477.10986, 964.858)(512.1373, 8706.18)(515.63416, 796.42)(493.58194, 3884.2815)(494.79517, 2470.8767)(516.0956, 4581.2124)(516.10626, 1828.6185)(517.0883, 823.26)(498.17325, 5263.3364)(498.08945, 1150.3828)	15.2679
CPD-8159	7027839	15538931	8602024	8679329	9147133	89083824	2356188670	85478976	35375716	2818647300	2862347260	292517856	350733120	458328128	958770620	28700108	2291457280	1815329150	1	93658264	1365539970	1	69514568	1	530428224	1646953860	1133368190	1547264000	538791100	906094020	660490750	79436208	CPD-8159	CPD-8159 [ C42 H78 N O8 P, tgt=99.28, overall=99.28 ]			(756.01886, 886599.25)(757.93317, 973501.1)(758.56616, 282471.66)(737.54266, 18344.191)(738.54565, 4927.0454)(739.5537, 634.7)(756.7125, 2506709.5)(757.55493, 1339296.8)(758.562, 740257.3)(759.56555, 183785.45)(760.57227, 11840.855)(742.8363, 68928.516)(739.5491, 15569.24)(740.5532, 232.91)(774.0412, 28512.992)(775.59186, 7401.3)(759.0555, 970315.44)(760.31757, 496439.03)(760.8972, 343287.6)(761.…	26.3623
CYSTINE	6899173	6309535	6832066	5732275	7378464	5651580	5056627	4348908	7165569	4076241	1365868	4303613	3924991	3074610	5003185	6711199	4940104	4032427	6965240	6482475	6763265	5454893	6225418	8535710	8255759	4809738	8569314	8407797	9296588	9147206	9324677	9784435	CYSTINE	CYSTINE [ C6 H12 N2 O4 S2, tgt=63.27, overall=63.27 ]			(244.6711, 1276.0234)(245.65376, 2505.2092)(246.01886, 2624.87)(244.82333, 811.198)(227.01678, 907.065)(260.0229, 14831.791)(261.02673, 13399.771)(262.23877, 19064.973)(263.33243, 100262.164)(264.05704, 12382.277)(242.0416, 383.79)(263.01688, 58259.195)(249.2864, 8508.096)(246.01294, 5267.6997)(247.0061, 5962.31)	1.62044
CPD-8157	4750482	7916080	3641383	18766796	3673648	2671564	908581500	85569256	46931784	1222129280	174916144	1073929340	1521306620	1624795260	1490170370	1083467390	518341120	660149760	2982595580	833540100	294632480	2273650180	278673792	439970464	909840260	1	460237440	228681984	675701440	958514240	578773180	88913584	CPD-8157	CPD-8157 [ C42 H82 N O8 P, tgt=95.28, overall=95.28 ]			(759.60736, 883985.1)(760.7795, 578806.25)(761.78265, 118215.664)(762.83295, 18833.816)(763.58246, 3742.343)(744.0737, 9925.777)(746.58484, 19705.314)(760.5849, 1031343.4)(761.5886, 460538.25)(762.59204, 153977.42)(763.5949, 36477.066)(764.59656, 5038.604)(746.4685, 17406.41)(747.13885, 20355.227)(745.5917, 22274.855)(777.6141, 8450.662)(778.6199, 3668.5723)(779.6216, 915.328)(764.8178, 19592.846…	28.9055
CPDQT-296	342382	783674	914035	441103	580822	408021	785361	529100	990001	543309	616515	945095	504570	515955	472373	659012	304391	874863	737605	1611723	1	1	1610444	685751	361417	1303381	1702281	1350024	1	603166	1141962	1592902	CPDQT-296	CPDQT-296 [ C15 H28 N O9 S3, tgt=47.12, overall=47.12 ]			(464.14093, 2544.9258)(465.0988, 232.7)(446.0785, 200.43)(465.10205, 4946.2783)(466.1066, 2058.7476)(445.59378, 3510.7397)(446.76462, 837.02325)(481.12683, 2202.8254)(481.1246, 513.1)(463.7817, 4902.7305)(463.1338, 6746.267)(487.0778, 6444.498)(488.0854, 787.43427)(489.0854, 131.63)(469.0749, 972.42)	14.0225
DELTA1-PIPERIDEINE-2-6-DICARBOXYLATE	1551981	854451	1687620	847189	2333903	930361	1126492	631032	266275	3142662	891781	1	2323851	3936277	342610	861103	701068	320782	1	1	639574	1045192	1158178	779168	940503	1	798733	706798	876325	1	688535	612558	DELTA1-PIPERIDEINE-2-6-DICARBOXYLATE	DELTA1-PIPERIDEINE-2-6-DICARBOXYLATE [ C7 H7 N O4, tgt=47.99, overall=47.99 ]			(171.40953, 14740.622)(171.04771, 3367.0784)(155.26457, 5136.599)(156.30983, 8318.986)(157.04666, 643.2257)(190.54617, 3162.876)(191.0812, 2611.45)(170.53926, 863.24426)(194.03279, 1249.486)(174.98172, 7250.556)	1.83284
CPD-9602	10884404	10859111	1751088	1413169	1383163	1372582	1531251	1238699	1465859	884820	8042525	8758621	1230051	969422	1257423	930699	1	10602257	557153	10646549	639618	686592	1028301	1031324	6368466	968767	1197786	1045901	673278	779004	958633	1382996	CPD-9602	CPD-9602 [ C20 H22 N2 O11, tgt=95.00, overall=95.00 ]			(469.0364, 938.34357)(471.79944, 996.7767)(472.1434, 480.33)(450.07364, 97352.62)(451.27905, 25164.273)(451.11386, 12205.921)(452.11694, 1255.2457)(467.2884, 12171.86)(468.1385, 1832.7928)(469.13666, 636.3175)(450.16742, 9618.799)(451.1719, 1392.2069)(453.13342, 3651.0)(454.1374, 2781.04)(486.01962, 2447.6685)(488.507, 882.85333)(489.1648, 2740.23)(490.1747, 372.56)(469.40686, 1320.2509)(470.4246…	11.5357
CPD-9603	2540532	1	2596881	2227626	2205039	1933513	967954	1918150	2877622	397253	954753	3411857	1657765	1369402	1533372	1394668	2933428	747128	1595216	1224833	1002449	942935	770965	1412660	626244	1703071	1096654	701768	625350	1	1067400	3060078	CPD-9603	CPD-9603 [ C26 H32 N2 O16, tgt=48.85, overall=48.85 ]			(630.5179, 6715.3574)(630.18726, 3307.7825)(631.18646, 5430.54)(611.16016, 9253.565)(612.1638, 3402.1038)(613.3663, 993.151)(615.17224, 1521.8434)(616.17584, 435.16248)(629.4795, 9280.324)(630.48303, 3122.2664)(631.1916, 219.39)(616.3828, 4337.6094)(617.18726, 6400.953)(647.7116, 16090.401)(647.5375, 11222.837)(648.54193, 2561.0288)(650.7213, 3591.88)(631.5182, 1912.397)(631.8736, 1065.2633)(630.…	14.0628
CPD-9608	1	177565	290685	285477	1	228119	255865	1	1	1	1	222672	1	1	1	1	346833	1	1	281138	1	798924	1033540	995896	1	734058	922968	1	899874	879600	697201	1249195	CPD-9608	CPD-9608 [ C10 H5 O3, tgt=45.10, overall=45.10 ]			(177.03328, 1116.1786)(175.03528, 2056.645)(176.03784, 1028.375)(192.56104, 1467.2108)(195.06674, 612.4487)(177.05513, 25534.617)	7.19086
CPD-13511	1	1	1435655	1634730	1729520	1	1	1	935589	4528760	2748529	940272	1437095	2917547	813022	861076	1152315	1079509	3145632	1687418	1196424	1233648	1321117	2026492	1005978	1	1241281	865006	1544396	1454302	994057	1547311	CPD-13511	CPD-13511 [ C16 H12 O7, tgt=45.58, overall=45.58 ]			(316.0538, 52743.39)(317.05612, 8335.925)(318.05902, 443.88998)(299.0466, 122594.59)(300.69034, 49875.402)(301.69617, 33804.016)(302.69904, 17838.062)(303.06326, 17543.91)(300.06287, 2470.11)(334.09024, 253.4475)(342.0511, 431.35)	13.1653
CPD-13510	1690485	8171114	1778402	2121527	5728313	1931245	2470894	4318713	2084713	5649980	15909172	2132163	4984225	4062460	4872401	4540065	2884833	7445691	4349382	2412309	1146616	2963269	2189795	1985277	5571547	2287904	2052642	10047205	1584092	1510286	1262151	2199200	CPD-13510	CPD-13510 [ C22 H24 O10, tgt=63.74, overall=63.74 ]			(448.57703, 34117.65)(449.5437, 11771.955)(451.14728, 465.18)(430.2028, 116880.69)(431.49155, 26351.156)(432.1371, 5249.6787)(433.14624, 319.65)(449.14233, 7414.0747)(450.14496, 1550.9088)(451.14645, 313.36252)(436.14737, 208.21667)(468.53146, 6465.6333)(470.38388, 3031.465)(471.18445, 820.475)(452.1711, 703.5763)(473.30835, 4697.83)(475.853, 1250.3787)(455.95996, 3460.6045)(458.7982, 168.25)	12.5743
CPD-13509	165302	127095	103202	172273	1	127637	153047	145376	112940	221054	270732	407794	277834	328526	298832	220183	198551	377844	385741	744578	259414	184683	580587	256040	125517	463727	682866	529920	182941	306451	435401	678694	CPD-13509	CPD-13509 [ C21 H19 O12, tgt=80.24, overall=80.24 ]			(463.08682, 13108.2295)(464.09088, 2515.581)(465.10175, 232.03)(465.1029, 17157.87)(466.10657, 5170.815)(467.1091, 1490.81)(450.2964, 87398.695)(451.29974, 17741.06)(483.62897, 675.34503)(488.19864, 4015.6052)(488.0872, 920.52875)(489.08813, 337.07)(468.26822, 734.86)	13.7911
CPD-8155	13948225	19923676	1	10481953	20628104	1	89958520	84293608	62502808	160053968	125018760	5348010	833644	5086901	91427392	1	133298256	68615472	92689624	26373230	10727242	16587766	12811271	15012307	9953714	8280838	2007452	11791697	13302576	20434060	14675956	36249936	CPD-8155	CPD-8155 [ C55 H74 N4 O5, tgt=64.50, overall=64.50 ]			(871.2798, 65667.984)(872.04913, 36186.957)(872.9113, 21694.871)(873.9108, 7530.191)(857.06995, 3090.6602)(872.5772, 4792.107)(873.5693, 7430.16)(876.5826, 18574.7)(856.6639, 33479.742)(858.08234, 30987.256)(859.24927, 21164.05)(860.0782, 21361.998)(892.2074, 13249.71)(894.16003, 61716.113)(895.39777, 47817.16)(895.6118, 41119.05)(873.24603, 13187.212)(874.43475, 27152.746)(877.16907, 49056.105)(…	27.5263
5-PHOSPHORIBOSYL-N-FORMYLGLYCINEAMIDINE	557983	622143	717543	512608	373670	481305	418117	363032	667919	229383	660397	354493	812307	567201	233182	313190	678331	345301	217060	436968	350584	414724	688709	410265	528899	566855	1	345684	515699	465428	426026	1	5-PHOSPHORIBOSYL-N-FORMYLGLYCINEAMIDINE	5-PHOSPHORIBOSYL-N-FORMYLGLYCINEAMIDINE [ C8 H15 N3 O8 P, tgt=74.25, overall=74.25 ]			(312.49997, 2465.228)(313.56635, 981.91003)(313.25247, 2668.503)(314.0758, 514.32666)(297.77664, 4185.259)(296.06387, 2316.4668)(297.0764, 218.73)(331.09424, 3733.7)(331.0907, 351.79)(315.0872, 431871.4)(316.0902, 80183.3)(317.09357, 12983.749)(335.05328, 731.86)(317.0367, 16207.15)(318.0393, 4055.66)	18.2082
STRICTOSIDINE-AGLYCONE	4247496	5846161	56441336	5683433	5797321	6153207	77946624	6217153	4756687	2220115	1994211	9677918	5124022	3856644	5768916	3954021	35748340	4497286	56820296	2746662	4805412	1548249	1853451	1493755	4841677	49371504	5422838	2633611	3172030	1	2941029	4893525	STRICTOSIDINE-AGLYCONE	STRICTOSIDINE-AGLYCONE [ C21 H25 N2 O4, tgt=74.70, overall=74.70 ]			(372.31314, 57043.867)(373.19147, 15319.327)(374.19214, 2189.4258)(353.17505, 13401.435)(354.17624, 16762.232)(355.1772, 9381.695)(356.18024, 38404.086)(370.99298, 31563.51)(371.99594, 11817.311)(375.205, 13045.07)(354.0805, 30542.277)(354.4345, 11785.886)(355.68692, 6288.402)(389.28903, 6085.5464)(370.20718, 21921.15)(370.2034, 15760.14)(393.80792, 36064.203)(395.3927, 11958.035)(396.18408, 1364…	9.33003
CPD-8123	260239	1	288432	2893858	1	3226253	1075051	1214492	198407	954022	293365	288555	1101010	2265322	3860952	287414	1049570	364100	1798857	313031	1128950	1163260	1391670	1011517	278226	3143153	3888647	1800231	887512	1858662	722778	1044018	CPD-8123	CPD-8123 [ C10 H10 Mo N5 O8 P S2, tgt=58.51, overall=58.51 ]			(522.65656, 3913.2178)(525.01605, 1272.89)(508.61823, 621.8825)(501.871, 607.4)(508.862, 332.81)(510.8631, 696.64)(511.8659, 286.4)(523.7381, 8750.785)(527.68616, 5848.07)(504.95813, 4844.7856)(507.76953, 889.16095)(513.20917, 1351.0599)(514.8793, 189.43)(538.37067, 12923.788)(540.65607, 2511.6023)(549.41315, 25438.818)(549.91815, 134332.58)(520.06415, 1354.7708)(526.7586, 24885.125)(528.2392, 79…	18.9434
CPDQT-286	186378	192786	155789	142225	230610	253866	265245	258387	203769	544133	182663	193994	238357	1	248674	210937	1	1	193433	198909	258156	343043	382136	434516	462287	397141	458709	365494	378527	413647	329996	581769	CPDQT-286	CPDQT-286 [ C13 H24 N O9 S3, tgt=39.74, overall=39.74 ]			(435.0576, 404.64)(416.23203, 7108.5967)(417.0501, 1186.6237)(418.04562, 520.614)(455.71777, 1113.0004)(457.58572, 1434.2933)(440.91492, 968.6592)(457.0548, 3506.39)(458.07126, 1566.96)(459.0612, 267.11)(439.5402, 6136.983)(440.0418, 142.07)	13.7496
CPD-8124	2207803	690588	2528637	2792139	503777	2554255	2395171	2289999	2006886	797122	2352832	152221	339462	350183	103632	2450925	1985214	127906	2026612	162893	1462000	1191752	95125	536827	301982	371932	147986	384030	94881	116852	203431	284992	CPD-8124	CPD-8124 [ C10 H10 Mo N5 O7 P S3, tgt=47.22, overall=47.22 ]			(540.0992, 1989.5205)(539.8599, 2022.46)(532.86, 1791.59)(519.2196, 7383.393)(520.3366, 2519.9497)(529.8443, 266.95502)(543.52545, 2053.14)(535.8664, 193.35)(536.867, 277.12)(521.298, 6627.177)(526.9301, 529.0683)(558.50146, 5773.224)(559.88885, 657.69)(536.9416, 4153.1665)(539.5461, 758.06)(554.72577, 733.7506)(555.7467, 2866.2178)(561.54724, 339.14697)(540.3986, 629.70374)(543.10913, 1870.111)(…	19.6265
CPDQT-285	1225468	1558123	2778106	3264318	1	3962497	4319698	4011202	3801020	2362546	1415039	1387678	1	2208871	1911235	1	1552529	2408823	2235240	1960603	3078932	8021977	6889957	7104911	8230298	1	1952386	12111744	14649447	2240121	6123092	9181245	CPDQT-285	CPDQT-285 [ C13 H25 N O6 S2, tgt=88.43, overall=88.43 ]			(357.95563, 5091.9634)(359.11316, 12796.875)(339.76938, 15318.73)(340.0967, 1601.49)(357.76163, 23164.488)(357.12222, 6143.859)(358.11835, 5242.784)(338.10883, 30874.459)(339.1113, 5031.9556)(340.10806, 1667.0334)(375.91336, 2149.018)(376.2833, 331.4771)(376.14285, 573.225)(359.9558, 14106.778)(361.1289, 42213.02)(378.10507, 9325.52)(360.7404, 1931.1534)	12.1905
CPDQT-288	277524	1066281	449240	285486	1	185417	276765	222447	482581	250844	287999	487935	170073	127992	154159	108756	149152	274369	128518	1	1	412819	452386	368184	433778	545206	547550	738419	524677	163688	180910	885780	CPDQT-288	CPDQT-288 [ C14 H26 N O10 S3, tgt=38.04, overall=38.04 ]			(449.0588, 358.44498)(451.0615, 102.08)(465.08127, 1832.3519)(450.56705, 845.88745)(483.11115, 4232.4736)(489.1014, 369.38168)(464.52402, 6286.626)(469.89218, 1808.5798)(487.06332, 3587.2021)(488.06674, 530.186)	6.76178
CPD-10037	1873658	2154975	2699621	1627098	1890273	2787160	2591927	1339260	2445091	1078497	1611949	1786548	3746121	1693749	2996110	2783577	1	1573754	1504659	3592257	1	1	1	1	1	1	1	1	2199143	2328549	1894002	3453261	CPD-10037	CPD-10037 [ C10 H14 O, tgt=83.02, overall=83.02 ]			(154.97575, 15576.143)(151.11201, 15548.826)(133.10127, 129103.4)(134.10384, 15457.678)(168.13821, 6121.5625)(150.5639, 4358.5107)(173.0949, 1413.0433)(155.6293, 4982.688)	14.0709
CPDQT-280	157847	451605	171316	112566	180186	111521	1	1	172862	732556	273837	114328	204622	1	1	167239	201657	153012	1	1	155299	1	1	1	1	274147	183708	1	1	166055	180187	1	CPDQT-280	CPDQT-280 [ C12 H22 N O10 S3, tgt= ]			(438.0935, 1958.3676)(439.2036, 2535.365)(440.78503, 2279.795)(441.53455, 1324.245)(420.43295, 2011.25)(438.54877, 151.45001)(419.0366, 3947.769)(420.04102, 223.9911)(421.03516, 278.45)(455.0763, 366.88)(456.0753, 150.07)(457.0739, 177.21)(437.066, 2070.99)(439.0612, 724.95)(466.034, 2285.32)(442.0181, 1457.8706)(443.6188, 219.25801)(444.0181, 404.72)	1.47497
FMN	235350	154963	1	216777	234293	191136	227073	257785	287453	1	182687	336729	173383	1	254053	148342	120452	145258	158426	251405	1	1	1	1	1	1	1	1	1	1	1	257393	FMN	FMN [ C17 H18 N4 O9 P, tgt=64.06, overall=64.06 ]			(455.42078, 522.99164)(455.0939, 530.97)(475.1224, 1205.5934)(455.10553, 9695.578)(456.10904, 1689.8833)(455.0911, 205.93)(463.06885, 1140.8)	16.568
CPD-17667	3690805	4943324	4604060	5173328	5336179	4133593	1	3233350	2875917	3168042	3075953	2043206	3418862	3361048	3555090	3402175	27885782	3610612	3996924	2438579	5559484	9177536	10103699	7979485	11113318	13509432	10828245	9045094	9041057	10033647	9074546	6056318	CPD-17667	CPD-17667 [ C17H14N2, tgt= ]			(246.11531, 104516.49)(247.1186, 16393.377)(248.12125, 1138.0426)(249.12697, 16200.2295)(251.99576, 5606.2803)(251.1338, 6384.07)(266.48187, 14945.227)(268.79584, 21673.953)(268.83276, 15783.731)(269.1675, 19105.92)(270.5247, 2486.0647)(271.44424, 956.0225)(272.3128, 1322.903)(273.1136, 110.71)	5.59156
DECOYININE	18728836	18525952	18083884	18311372	18090520	18284736	17369800	17905292	17141578	18196288	669189	16769116	16698497	1	16869564	16143779	3185956	16661087	16349200	15484875	8931472	6080424	4136837	5389140	1	6197736	6344956	454128	6012963	5623287	6120298	6165725	DECOYININE	DECOYININE [ C11 H13 N5 O4, tgt=77.86, overall=77.86 ]			(279.36188, 376625.72)(280.3123, 82866.93)(281.31567, 11916.779)(283.10727, 6667.4)(284.1076, 7992.88)(263.0515, 10380.441)(282.6794, 287.2614)(262.13458, 4753.7017)(300.978, 3580.117)(301.80582, 5566.8833)(301.14, 2671.1)(282.4209, 2399.667)(284.1325, 1834.0251)(306.97128, 2522.601)(307.0962, 770.94)(289.08902, 6905.6626)	16.5905
CPD-8120	7069645	8310201	1	6965916	6882579	1607455	8062521	6103159	6506737	1248852	3936935	5436147	1541522	1095153	4369849	3946454	4523208	5136227	2900253	6133982	1028344	2912956	4018699	3320876	2471976	3362421	1991090	636599	4307228	2730888	1623100	5586212	CPD-8120	CPD-8120 [ C20 H33 O2, tgt=82.60, overall=82.60 ]			(305.76907, 41857.01)(306.24942, 8424.76)(290.13608, 7724.5293)(291.53812, 2669.25)(292.2544, 546.43)(307.2631, 474.42)(290.8927, 15506.088)(291.89453, 5023.64)(292.0055, 3644.6177)(325.44672, 3177.046)(326.19626, 7091.498)(327.2926, 22697.414)(327.2895, 17277.55)(307.18253, 10499.518)(308.47467, 12140.439)(309.04904, 8575.68)(309.28577, 4690.0327)(328.40887, 29711.299)(312.80658, 9978.414)(313.2…	25.1657
CPD-8122	324734	471755	353745	287433	283479	9627388	6677875	122843	224745	8190029	234267	541354	505500	689868	457640	918786	4753952	455957	738349	443612	562836	600726	414842	612137	352010	520831	832534	458024	269974	496892	572782	406854	CPD-8122	CPD-8122 [ C20 H23 N10 O12 P2 S2, tgt=54.22, overall=54.22 ]			(727.64307, 1276.6075)(703.028, 590.32)(728.0441, 1162.3423)(729.0557, 1701.421)(704.0349, 581.20667)(745.2832, 18317.62)(746.3186, 10148.877)(747.29297, 5757.8066)(748.03723, 893.28894)(749.03467, 385.3337)(726.0224, 79134.76)(727.02515, 12454.328)(728.00806, 500.395)(729.0035, 240.32)	5.07431
CPD-8121	5711877	6489885	2211243	2559864	1	1	1	1	1	4405037	1	1	1	2897456	2454839	1	1	1	1	1	2521424	1	2814996	3478814	5118642	1	1	1	5252136	2058811	1	1	CPD-8121	CPD-8121 [ C20H31O2, tgt= ]			(304.77316, 41918.805)(304.90158, 11843.765)(285.21988, 39036.547)(306.91382, 2181.2134)(287.2354, 2554.1917)(288.2379, 941.69495)(323.1041, 9049.806)(325.27878, 10334.123)(304.35364, 105906.84)(305.26566, 38395.668)(326.22113, 27712.355)(327.22974, 10460.618)(309.4158, 12713.114)(310.21744, 7288.9697)	26.9801
CPDQT-273	215444	255193	259111	255144	252092	243501	221446	230376	222639	1	1	186672	1	1	217000	250220	251835	284904	1	261901	1	1	1	1	1	1	197142	1	217946	1	157597	139029	CPDQT-273	CPDQT-273 [ C11 H18 N O9 S2, tgt=36.64, overall=36.64 ]			(358.04272, 1039.6996)(373.06628, 12651.56)	22.4245
LOGANIN	1	3396315	4630322	5560028	4256753	4133478	5706947	4415517	5070991	1	1	6647392	2616746	4777728	3654232	2355984	5533121	1159195	4168572	8647501	1540014	1592731	2763109	2104804	1023591	2056163	2440802	2079063	2384002	3851062	2857452	3363328	LOGANIN	LOGANIN [ C17 H26 O10, tgt=82.48, overall=82.48 ]			(391.0494, 6726.449)(392.40427, 4079.295)(393.15515, 311.145)(372.64087, 22171.89)(373.87128, 9612.295)(375.39713, 4263.0674)(391.93103, 10349.048)(392.41614, 4869.7075)(393.1808, 1154.52)(374.50317, 4394.165)(376.65805, 637.38)(377.1595, 237.26501)(408.63254, 7921.644)(409.69125, 6075.4194)(391.73132, 4065.224)(393.68344, 777.36005)(394.187, 352.84)(414.9457, 4061.2268)(414.43237, 1730.2507)(415…	8.848
CPD-8138	1153390	173323	3128895	1044154	826937	1197248	1870234	1990464	1386421	307691	603002	1286471	1036595	871996	1378213	492381	2291936	466770	1094324	4819891	2214057	2549911	2654286	3478148	1644759	654190	1187820	2838441	2211403	3371026	1459311	5820450	CPD-8138	CPD-8138 [ C15 H10 O3, tgt=84.61, overall=84.61 ]			(238.06392, 1286.092)(239.07045, 80348.52)(240.07445, 13709.225)(241.08243, 2287.659)(221.0599, 15511.37)(222.067, 219.45)(258.1011, 222.33)(241.48946, 7406.159)(242.19522, 3114.2527)(243.10028, 2917.0432)	23.8884
CPDQT-277	6972941	19586488	19970404	8328036	34794648	35159876	72944192	14581562	20368460	1	8947701	1	42261404	21457940	51322528	38200104	51959932	66802184	55917372	53453452	1	23271212	32118596	29952568	30005790	1	25740112	30628896	30674116	29299548	35130784	5087285	CPDQT-277	CPDQT-277 [ C11 H23 N O2 S, tgt=64.23, overall=64.23 ]			(237.74736, 2084.0962)(219.63487, 125010.0)(219.3031, 24528.688)(219.80377, 32513.174)(220.1361, 33499.72)(234.15233, 325705.6)(235.16603, 75970.22)(216.14088, 418402.84)(251.28477, 17313.795)(252.17787, 2853.8916)(234.1688, 109229.82)(235.89532, 57471.42)(236.91776, 27897.48)(256.25864, 1782.1547)(238.12479, 2165.1123)(239.12314, 140.052)(240.1154, 324.39)	25.3888
CPD-8134	3068264	749806	33022240	7268670	25348520	20591604	19640896	33607120	24733068	30861730	29723328	31902836	27230086	33960484	23686498	27405098	11894486	7558125	23356112	12247320	5312627	1	14160789	7107451	5497700	3401541	6278207	7580028	7747764	11421456	10077221	11232503	CPD-8134	CPD-8134 [ C28 H48 O, tgt=99.53, overall=99.53 ]			(400.36765, 20865.004)(401.7682, 546.2093)(402.3643, 52.14)(382.35767, 643.005)(401.3798, 934.86664)(383.43423, 193228.95)(384.3708, 60509.324)(385.37375, 9132.292)(386.377, 650.44366)(420.4047, 1156.09)(400.39285, 2858.728)(401.3995, 1112.6)(423.39355, 13867.756)(424.4143, 6231.4077)(426.3674, 5921.87)(405.55133, 1474.662)(406.8579, 525.87)	29.8742
CPD-8135	4626251	4479621	4640113	4360107	5002057	4753518	2672063	1	1	1	1	22687364	33914088	39967856	25705828	28432804	7918513	11966020	20967192	14742481	25738052	1314295	1	1	1	1	38954252	1	83894632	1	8480452	1	CPD-8135	CPD-8135 [ C28 H46 O, tgt=95.17, overall=95.17 ]			(399.23206, 22325.658)(400.3615, 6908.4414)(401.36166, 1079.5975)(381.48947, 4944.7563)(382.35184, 727.08997)(399.36227, 152899.39)(400.58072, 38045.66)(401.36877, 7617.8438)(402.36508, 336.77)(382.01968, 3419.1836)(382.79965, 614.7222)(418.61844, 9195.733)(421.9085, 1806.745)(399.38705, 2406.1765)(421.48926, 4224.809)(422.80408, 3067.001)(404.53598, 2449.0962)(405.19318, 2952.5815)(407.34125, 60…	29.3266
DIPYRROMETHANE	1	2063328	1573021	1324687	2302320	2047426	2762970	2112552	2481279	1	1024444	1	2051759	570576	2101159	1350317	1463196	1175801	919489	798340	1417810	1890733	638872	1725627	2173757	3110640	1926809	1839978	1704396	2163734	1966535	960597	DIPYRROMETHANE	DIPYRROMETHANE [ C20 H20 N2 O8, tgt=67.01, overall=67.01 ]			(419.12842, 16370.791)(420.2433, 5452.792)(420.12943, 25626.984)(402.24747, 1358.9038)(402.6214, 1774.6499)(421.29617, 494395.78)(419.1311, 6620.82)(422.1441, 7140.24)(403.24402, 3663.1418)(401.1239, 3013.92)(435.494, 869.88336)(417.57834, 20463.37)(417.48544, 6685.5156)(418.53052, 1293.9786)(421.1568, 239.35)(441.71454, 1657.0219)(442.1245, 350.63)(443.125, 557.99)(425.11368, 916.0633)	15.8458
CPD-17650	26089248	29105868	41831728	15092151	619176450	21174148	25868690	14867300	273813792	57149972	879469760	91563408	69019048	248057824	193221104	202508480	1	148796544	197097536	202265440	152395664	251327216	478555488	788103170	448792384	139157344	84357304	381179616	100267584	37937940	60714112	9501802	CPD-17650	CPD-17650 [ C40 H56 O, tgt=69.26, overall=69.26 ]			(552.7748, 809457.94)(553.4332, 199082.5)(554.43756, 39877.383)(555.4282, 5204.29)(535.0203, 59535.24)(535.4207, 18271.336)(536.42267, 4757.45)(556.4482, 17164.59)(556.45465, 7110.7705)(555.4581, 2795.03)(537.74786, 14597.686)(538.93866, 11998.892)(540.6125, 10039.063)(540.7815, 5754.043)(541.4494, 511.5)(571.47217, 788211.7)(572.47546, 316257.06)(573.482, 239500.75)(574.4824, 43267.0)(554.69214,…	28.2429
CPD-18334	954960	175272	169786	256787	370185	218869	1062165	171032	1243031	1	486389	168013	161669	366499	1	186413	1	167842	479744	1	1020380	220886	1	131171	963271	1	1	1	1336985	928518	841798	1227981	CPD-18334	CPD-18334 [ C11 H5 O4, tgt=57.04, overall=57.04 ]			(185.01512, 778.9109)(187.02339, 1365.9967)(219.05049, 15363.09)(220.0548, 579.8034)(201.04358, 18525.406)(202.04868, 1029.4095)(228.02003, 2799.7473)(209.0086, 3174.97)	11.9145
CPD-17651	171777520	21609404	76338888	53438172	123056488	63320820	138650000	12799376	156416992	94390584	12786528	37327052	61548296	97329704	117559352	73115464	65862208	141565920	34852772	49253440	66591576	90444336	265286640	219895824	218401376	112337912	125067936	228687008	256988064	43923012	49422500	82908840	CPD-17651	CPD-17651 [ C40 H54 O2, tgt=72.27, overall=72.27 ]			(566.4084, 96970.15)(548.3974, 20218.412)(567.4197, 254087.4)(568.4245, 127260.76)(569.4282, 57363.902)(549.40845, 64628.504)(550.41187, 28162.662)(551.4152, 8486.7)(587.6181, 61878.16)(588.4593, 75347.4)(587.9647, 20659.809)(589.4656, 68243.81)(570.40717, 88166.32)(571.2047, 58372.984)(590.0717, 5640.777)(592.65063, 1412.6575)(574.43555, 2117.3467)(575.65295, 2505.3442)(576.3152, 3521.0156)(577.…	29.3518
CPD-8131	3396248	5361639	4445051	3516701	2782185	3333385	1	2647273	5494230	3646151	15714858	1	4823743	4935351	4963225	2540256	1	5696691	8643740	3840011	5914378	4473896	9709560	5952679	5452711	16193337	8565302	6496100	7457365	7937973	4380113	4363659	CPD-8131	CPD-8131 [ C10H8O, tgt= ]			(147.06517, 23862.31)(127.051254, 426.405)(148.87024, 19574.818)(149.0779, 19218.264)(129.85712, 42950.965)(131.0673, 37838.32)(163.54486, 3370.204)(165.76932, 1736.411)(144.08089, 200785.83)(145.08395, 27459.506)(146.07787, 3791.5967)(170.29526, 1806.0647)(171.23936, 1546.9735)(172.0598, 816.32007)(151.0412, 962.17)	6.71081
ISOVALERATE	1	1726994	974499	10344527	13803332	14711067	17588064	4321537	5604529	8457192	1578064	1	4268284	10096998	5143595	5823995	1	1	7976799	4210628	4920477	1947902	1	3352337	2780337	2352066	5431163	2093454	1348817	4271185	1970902	2848891	ISOVALERATE	ISOVALERATE [ C5 H9 O2, tgt=60.81, overall=60.81 ]			(101.05971, 23993.414)(102.05905, 720.78705)(104.07104, 4972.42)(121.10056, 11151.316)(103.0873, 441.57)(126.054825, 1816.8687)	23.6162
RICININE	1292515	1	1417544	926009	524690	622792	1	723150	1268169	1	1	440189	818679	2796269	501852	701138	1	944721	3941506	1554341	2420444	1	1869541	1	1045768	1123368	739714	1126835	1618658	6950074	594960	7437056	RICININE	RICININE [ C8H8N2O2, tgt= ]			(168.28455, 16281.569)(169.0699, 3236.779)(150.05748, 44501.137)(151.06035, 5631.8325)(167.07178, 2118.0574)(149.73035, 29808.438)(182.0914, 1648.58)(165.84962, 41451.348)(166.28746, 17453.58)(189.05272, 2798.5464)(173.0453, 110.04)	2.92244
4-HYDROXY-BUTYRATE	478778	2764825	1395789	4338563	2171350	713851	1087254	1	606449	1	533206	1	1410141	1	1182110	782521	1	547577	426843	1	1306209	1219391	737813	627063	803909	1710424	741681	599784	428220	3112589	1	508122	4-HYDROXY-BUTYRATE	4-HYDROXY-BUTYRATE [ C4 H7 O3, tgt=50.94, overall=50.94 ]			(103.0397, 4198.91)(106.5519, 2046.905)(124.0796, 9902.61)(106.06976, 107489.23)(107.07304, 44764.875)(129.66238, 8523.848)(130.53867, 5651.8936)(131.039, 571.39)(111.0252, 5353.41)	2.6961
CPD-12402	5756790	5295903	9004629	8137359	7257453	8144711	8065365	7824501	9343036	3443556	4228408	3427541	9080014	5700255	9259418	8003433	1	4942197	5702506	14017216	637025	831999	2810023	4314824	5720534	1	2333676	616248	1	1	1	2996201	CPD-12402	CPD-12402 [ C19 H33 N4 O7 S2, tgt=68.37, overall=68.37 ]			(493.61002, 20640.346)(496.18152, 2662.085)(498.1821, 1766.17)(476.1691, 5753.6177)(477.41803, 1734.7625)(477.67407, 837.105)(495.13672, 242069.33)(496.18765, 59035.773)(497.30405, 31524.648)(499.1897, 58833.625)(500.08218, 76499.945)(500.1939, 38608.06)(477.1192, 4240.541)(478.03232, 572.5957)(478.1911, 510.75)(512.3239, 9963.888)(513.3328, 26384.162)(514.3006, 15104.102)(516.21735, 9255.119)(51…	15.7312
CPD-9638	8826929	6777901	1	8002644	6891795	5847829	1	1	1	1	1	1	1	1	1	1	1	1	1	1	18278290	1	1	1	16706709	13500935	12798068	1	65564992	1	121626920	1	CPD-9638	CPD-9638 [ C9H9O4, tgt= ]			(181.05006, 26102.018)(182.05348, 3890.3582)(163.0393, 1042929.6)(164.04253, 104382.73)(165.04573, 3670.6943)(185.06625, 4073.1821)(199.0867, 1125.24)(183.07874, 13573.091)(207.04651, 3115.755)(189.03586, 112042.33)(190.03964, 10781.3)(191.04095, 800.43994)	25.0541
CPD-12400	1820812	2108427	3070080	2652593	2582107	2598510	2020860	3971603	2074304	3230612	4508071	2070516	1766262	2629671	3486238	3691341	1	2983422	1	1505798	4511550	4108091	4976519	4246310	4971643	4823000	4395428	4199645	4328673	4131780	3508593	3591134	CPD-12400	CPD-12400 [ C13 H25 N3 O4 S2, tgt=60.49, overall=60.49 ]			(352.17886, 3172.8582)(352.8005, 919.56006)(355.1201, 525.22)(333.24963, 35618.926)(334.28625, 5005.038)(335.12048, 247.3)(352.81888, 3986.9219)(355.30286, 1110.274)(356.13794, 114.5)(357.88412, 539.8575)(358.1311, 369.32)(338.32388, 3278.7336)(339.622, 9647.153)(339.87207, 9889.018)(340.121, 8177.86)(372.27997, 1753.8024)(373.16156, 220.78)(353.56018, 1382.8512)(355.15396, 247.5022)(357.14883, 2…	8.05531
CPD-9639	8496589	11718574	1	6906319	1	1	8470918	1	1	9034051	9210857	9278763	1	7040740	7778221	1	4795597	10287495	7206528	5734853	8599494	6677563	11235980	7581771	6197063	14201512	12950456	10865749	5996903	7053803	9657734	7249972	CPD-9639	CPD-9639 [ C18 H16 O8, tgt=99.50, overall=99.50 ]			(343.08154, 2249.1401)(383.0741, 235543.95)(384.07742, 44106.766)(385.07965, 7647.292)(386.0889, 546.3934)(343.0822, 7918.3765)(344.08658, 1553.1976)(345.09558, 455.745)(378.11868, 25781.443)(379.12274, 5390.179)(380.1245, 806.2982)(361.09207, 116864.25)(362.0961, 22664.932)(363.10254, 4158.3496)(369.07858, 781.6983)(363.95218, 2316.2683)(364.99078, 1203.7152)(365.1245, 2664.7148)	13.7475
CPD-9633	8496589	11718574	1	6906319	1	1	8470918	1	1	9034051	9210857	9278763	1	7040740	7778221	1	4795597	10287495	7206528	5734853	8599494	6677563	11235980	7581771	6197063	14201512	12950456	10865749	5996903	7053803	9657734	7249972	CPD-9633	CPD-9633 [ C18 H16 O8, tgt=99.50, overall=99.50 ]			(343.08154, 2249.1401)(383.0741, 235543.95)(384.07742, 44106.766)(385.07965, 7647.292)(386.0889, 546.3934)(343.0822, 7918.3765)(344.08658, 1553.1976)(345.09558, 455.745)(378.11868, 25781.443)(379.12274, 5390.179)(380.1245, 806.2982)(361.09207, 116864.25)(362.0961, 22664.932)(363.10254, 4158.3496)(369.07858, 781.6983)(363.95218, 2316.2683)(364.99078, 1203.7152)(365.1245, 2664.7148)	13.7475
CPD-9630	4810641	7104803	8078380	6845721	4960597	5244720	5358976	4857910	4880639	3022967	4389806	4970778	7171082	4178924	5361902	4417750	7322146	6761369	3823600	10891887	6948423	7693726	8297740	12630767	5840456	6843498	7580024	5076551	9509793	8135075	5756219	8424791	CPD-9630	CPD-9630 [ C16 H11 O7, tgt=98.24, overall=98.24 ]			(315.05066, 269102.3)(316.05374, 43282.496)(317.0561, 7102.26)(318.05896, 419.165)(333.66, 303.0357)(338.0361, 848.7791)	21.4036
CPD-9631	21780192	22126756	27669408	57327696	22112652	48692708	47784244	21281232	21551980	29546904	17817052	44134808	7702800	39354092	45344284	21065342	52169044	50200296	35180484	9395263	62712136	64685920	19386632	74910872	55695072	13251052	16824140	50450348	66948636	61813808	50846676	63790976	CPD-9631	CPD-9631 [ C17 H13 O7, tgt=97.06, overall=97.06 ]			(329.13345, 13025.089)(330.0718, 1928.9039)(331.0757, 90.95)(311.0557, 961.55)(312.0595, 122.91)(330.0738, 104132.2)(331.0782, 25596.92)(332.0824, 4012.777)(312.06348, 36367.156)(313.06757, 7526.5225)(314.0723, 974.31006)(348.24722, 1488971.6)(348.10602, 267919.47)(349.10852, 24374.92)(350.11325, 2306.8523)(329.0858, 4011.84)(352.05573, 6591.818)(353.05914, 2212.4456)(354.06262, 444.63)	20.9228
CPD-9635	1613813	4922057	9316950	3114739	4374377	24277080	1	40759808	51643936	1507730	58879544	48917392	10416109	9610466	42539000	10295206	2627007	25734878	28457500	7141218	50093248	75997464	7724043	7949105	3507632	998978	1440705	2861850	13351915	2287966	1033915	1151786	CPD-9635	CPD-9635 [ C35H52O4, tgt= ]			(538.15515, 6218.7744)(539.731, 10950.258)(539.3987, 5582.4375)(540.3999, 1179.48)(521.5496, 5368.26)(522.1644, 3044.8833)(522.96185, 3795.556)(522.8938, 1436.275)(538.8268, 16462.35)(540.2618, 11626.311)(541.9056, 13461.881)(541.90924, 9572.74)(542.4016, 10897.55)(522.3915, 7064.4497)(522.9659, 3598.4458)(524.3985, 10189.712)(525.3943, 12618.54)(556.2935, 18634.748)(558.0201, 17964.895)(559.0671…	28.4349
CPD-19751	7737879	9858235	5658156	6138110	2903766	7645726	4046855	6786806	7371981	13034328	13138414	7870865	15175685	11251577	1	12346061	816081	10415530	14732419	3494857	8221497	8421152	9072755	8733729	13066773	12373209	6878105	4187175	7754657	4776962	5982635	1	CPD-19751	CPD-19751 [ C6 H5 N O, tgt=47.54, overall=47.54 ]			(111.91393, 66084.49)(109.08592, 5622.4185)(110.38174, 6683.69)(125.07096, 147766.2)(126.06922, 17654.62)(127.07403, 447.6925)(109.064705, 707.44)(132.92145, 11288.684)(133.7857, 2957.9724)	1.89753
CPD-17646	40721156	1	44237744	2810130	14509105	2169776	13014683	13626407	1	11422238	11328208	7076581	12828364	39002840	11566209	6483554	1	4137639	12712954	4802317	19014006	8177384	13134149	19760628	7246264	8367718	6518810	14159224	1917117	17218548	12357878	21175596	CPD-17646	CPD-17646 [ C18 H29 O5, tgt=78.00, overall=78.00 ]			(326.33337, 9863.617)(326.20862, 305.955)(308.07007, 16558.197)(310.19882, 32492.879)(330.13675, 240764.44)(331.22232, 62536.215)(310.5898, 9411.174)(311.68695, 14646.269)(312.2089, 26507.006)(312.9397, 13792.624)(313.21417, 10873.475)(343.6855, 186967.33)(345.23682, 3736.79)(346.2391, 164.93)(326.22644, 8048.096)(328.06836, 17845.521)(350.58746, 11025.785)(351.38348, 4648.67)(351.95352, 829.0225…	19.6213
CPD-19753	1447124	868416	1061774	1653662	2280719	2119501	2563453	2058241	2413563	1	145598	1090450	1113314	1367359	1	130216	1	1373456	1	1159663	986894	1148004	709558	890953	434525	1347698	301879	714322	1574392	829005	356752	1406648	CPD-19753	CPD-19753 [ C8 H13 O8, tgt=72.49, overall=72.49 ]			(238.81522, 901.0563)(220.05351, 8836.49)(220.05469, 530.355)(240.42366, 35564.39)(240.71227, 11180.856)(221.70067, 22383.568)(223.0654, 1370.9689)(255.51537, 23192.47)(256.10242, 4061.7666)(238.42223, 837.93994)(260.05347, 17727.55)(261.05664, 3557.2656)(262.0529, 208.86499)	8.12319
CPD-17644	12706969	10610922	1	1953846	8979723	4105840	5977400	4913983	4905572	6167057	24739972	6321394	21883966	3408123	35629352	10305745	15812780	1	1	16515029	10597342	9368145	3232527	2060182	1339699	7446669	5468101	2010347	2918722	15248497	4693067	1846202	CPD-17644	CPD-17644 [ C18 H36 O2, tgt=98.33, overall=98.33 ]			(289.289, 2636.24)(268.1526, 6853.382)(269.04407, 1971.3345)(270.2766, 1938.35)(288.28952, 386.2575)(269.82794, 14874.378)(270.85135, 7230.276)(272.28568, 1608.02)(302.61804, 11224.291)(303.30856, 7526.0757)(304.3016, 5729.675)(284.29517, 234056.78)(285.29846, 43631.75)(286.3017, 4210.8477)(307.41995, 2355.123)(290.81937, 2565.1123)(291.11172, 720.29)	27.2217
DICOUMAROL	373080	739513	770348	775286	753169	732080	640812	279238	319991	330243	365281	715529	910458	299246	682983	796504	808921	974210	488550	868422	308780	177345	154696	278363	178804	161466	173699	674098	214004	208428	160165	198708	DICOUMAROL	DICOUMAROL [ C19 H12 O6, tgt=66.93, overall=66.93 ]			(336.31268, 14291.959)(337.2659, 2653.8645)(338.0648, 272.77)(320.06015, 3560.4897)(321.0615, 6359.04)(338.0322, 9199.001)(338.07297, 2223.4092)(339.07556, 167.24)(319.0608, 7025.205)(320.0681, 89.41)(354.70023, 13279.825)(356.10312, 1144.5402)(359.11438, 1122.1074)(337.59082, 21446.918)(338.09595, 3928.3801)(339.09033, 1280.45)(341.0964, 788.44)(361.05325, 10189.964)(363.0625, 871.39)	19.1499
CPD-17645	8967798	8197544	21881304	8444065	12265090	10128782	7937642	6334176	8321845	8187171	14267711	4396529	11856220	7244301	26269718	5809004	17475834	6164286	12566508	35329296	16929224	27032080	20356876	37949632	17124476	6405320	11129972	10499017	8085597	21514936	9346973	18766388	CPD-17645	CPD-17645 [ C18 H27 O5, tgt=75.51, overall=75.51 ]			(326.33698, 34641.957)(309.85513, 4312.7915)(324.86383, 4638.482)(326.19885, 40124.2)(327.2028, 13149.43)(308.55066, 13026.874)(310.09506, 3929.214)(310.1958, 4518.035)(310.196, 7104.98)(342.19177, 88842.95)(344.96286, 69869.99)(346.2355, 1194.58)(325.02942, 17174.361)(326.09564, 34003.273)(326.2209, 40098.22)(350.1847, 2174.6)(328.16345, 637998.8)(329.47528, 95841.586)(330.1689, 10281.009)	22.9166
CPD-17642	1940491	10920966	5371174	1834900	1186693	2448865	1906242	2857471	2001887	2051898	4478987	2903472	825160	4182948	1702611	1688451	2017038	1	3664439	5788869	1859002	1819731	4105645	1674975	1828624	12213694	7203281	5994195	2771066	4940447	9269238	7157617	CPD-17642	CPD-17642 [ C16 H34 O2, tgt=69.60, overall=69.60 ]			(242.24817, 119210.47)(243.25116, 22769.125)(244.2541, 1963.4138)(258.27966, 29223.137)(259.2829, 4609.119)(282.2895, 2218.2915)(282.24908, 500.61746)(283.2396, 412.46)(263.23743, 95186.13)(264.24158, 19065.47)(265.24753, 6947.3804)	25.6254
CPD-17643	5288612	1770784	1240558	5161009	329082	497240	1670648	1	4362112	767816	716107	9660505	1637441	682799	360381	200795	765864	963068	8955157	4565135	283780	212077	301717	340794	287816	989276	537472	721629	264672	290604	524204	2479879	CPD-17643	CPD-17643 [ C18 H38 O2, tgt=32.85, overall=32.85 ]			(270.27963, 20624.863)(271.28253, 5522.0254)(272.2854, 602.2625)(286.31024, 10298.512)(310.65, 10349.948)(312.789, 9317.982)(314.2874, 2812.33)(291.39734, 7990.8345)(292.522, 4023.9727)(293.27933, 549.04755)	29.4973
CPD-17640	1685620	1023137	512855	4173581	4292758	397911	1386068	4415800	4167816	1	2335568	3838829	3017876	445481	578273	399442	1249861	2856917	2954061	3285583	4152689	3509166	2112616	2688482	1534418	1425002	2596754	1524378	1373634	1963376	1217684	1140891	CPD-17640	CPD-17640 [ C18 H35 O3, tgt=59.48, overall=59.48 ]			(300.75952, 17428.273)(282.8453, 2671.2388)(284.7575, 1227.8425)(284.45932, 2846.0884)(285.26105, 208.275)(319.63364, 73257.1)(319.2982, 11430.846)(303.68417, 7189.714)(303.6298, 5933.94)(303.2912, 1025.45)(304.2982, 2430.17)(323.88144, 7108.46)(324.0048, 2500.9937)(307.18054, 152913.86)(308.20267, 45216.64)(309.2489, 5634.19)	23.3263
CPD-17641	2011278	1590748	1	1179712	2477467	9611287	1759154	9940218	2825995	1124963	16415935	1	90506	4425156	17920116	4705486	3441702	1320205	10458723	10326763	6472835	200382	1	1848053	1975392	722880	2542830	616646	1833259	11867541	4299035	2539667	CPD-17641	CPD-17641 [ C39 H66 N7 O18 P3 S, tgt=68.09, overall=68.09 ]			(1045.3367, 1220.4275)(1046.34, 736.33997)(1029.3313, 1683.5538)(1031.1636, 1711.3748)(1031.8412, 2365.7617)(1031.3367, 8317.9)(1032.3417, 9477.45)(1033.3313, 1301.08)(1034.3279, 1162.91)(1047.3488, 4123.22)(1048.3358, 100.84)(1049.341, 1380.8)(1029.2268, 4328.8105)(1029.839, 2406.0283)(1032.3484, 248.415)(1065.7094, 416.67667)(1046.5637, 1057.9421)(1048.8569, 214.74)(1068.5579, 26653.299)(1069.4…	27.3346
CPD-19759	3491780	1911792	4724798	1368325	4612626	5213107	4720092	4417068	2757894	1530581	2860879	3416285	5332781	1028937	1694455	4768724	1	2770231	985580	1807835	1	2188724	2703930	4450758	3081540	3324851	2920160	2791040	858525	3486385	882949	1700289	CPD-19759	CPD-19759 [ C35 H32 Mg N4 O7, tgt=54.63, overall=54.63 ]			(646.44525, 6261.863)(647.6349, 2967.9636)(648.7484, 2015.3452)(629.02966, 5575.2095)(629.4541, 10267.195)(630.0106, 3919.2441)(646.7179, 4854.0425)(648.23505, 5191.555)(651.2387, 858.2)(630.4371, 6006.848)(632.8175, 1471.5441)(630.2187, 988.13)(665.97455, 2270.1755)(667.68243, 3246.768)(667.92096, 2347.5117)(646.11957, 1650.3253)(672.1692, 2508.5005)(673.5428, 4360.1255)(652.19714, 1796.5093)(65…	15.3402
CPD-10081	3640734	3979556	5554377	1974695	2383302	2006127	5348831	2343723	4632081	897188	1061679	3886063	1712570	1927851	5028775	1837670	2295378	1291246	2496222	3776950	893417	3354378	879744	908823	993978	3611882	684877	1322619	944727	1829237	3599516	1056869	CPD-10081	CPD-10081 [ C26 H25 O13, tgt=67.55, overall=67.55 ]			(545.1285, 28073.77)(546.1322, 6506.008)(547.13416, 1269.155)(548.14307, 151.02)(527.48834, 34594.746)(528.4911, 7600.8936)(529.11847, 1220.4)(530.1196, 102.395)(566.1714, 715.605)(567.1716, 557.885)(570.62506, 2131.197)(571.1256, 3366.4595)(572.0163, 592.6555)(573.1255, 82.64)(552.7007, 1088.9781)(553.1127, 2477.26)(554.1152, 108.26)	7.91081
PSEUDOURIDINE-5-P	175006	160681	135538	313202	1	184897	219610	196796	219098	735762	449970	169526	188891	223578	221411	210528	1	1	301773	173677	2217413	1	2349708	1	1	2167656	2289729	1	183198	162198	1	173963	PSEUDOURIDINE-5-P	PSEUDOURIDINE-5-P [ C9 H11 N2 O9 P, tgt=87.27, overall=87.27 ]			(308.01428, 156.26999)(307.0239, 171.795)(343.81543, 1066.9425)(324.04828, 41148.977)(325.0514, 6473.3823)(326.0487, 3092.0835)(327.05417, 400.55002)(347.01367, 162.84)(329.2051, 66363.45)(330.00888, 8360.681)(332.00592, 2353.77)	4.31161
CPD-9642	52110632	1	61914552	79112384	80550536	1	1	1	76091440	1	1	1	1	1	14908985	1	4210647	1	14394153	1	2176599	1	1	1	1	1	1	1846082	11655332	10679618	8940010	14979656	CPD-9642	CPD-9642 [ C16H18NO9, tgt= ]			(370.1069, 707.655)(350.71744, 1708.5461)(370.5103, 797.72797)(371.60938, 1636.8451)(353.2481, 39091.66)(355.107, 3227.02)(386.8477, 868.5329)(387.1243, 997.63)(371.01846, 4771.7583)(372.53253, 783.65393)(393.09116, 1302.0033)(376.58752, 549.91003)	6.34181
BIOTIN	167060	413554	179018	156325	804587	183696	1	286697	334302	1092378	1252717	356568	882532	315167	306797	1	13218549	940235	1	376091	647623	825183	1038102	224531	1145432	1135222	1	1	884243	1383368	1240937	437256	BIOTIN	BIOTIN [ C10H15N2O3S, tgt= ]			(245.36658, 4863.3335)(246.6649, 2394.4675)(247.0788, 2059.075)(248.0842, 2292.25)(228.06851, 11917.5205)(230.07303, 4123.1787)(248.08728, 392.50333)(230.53558, 6518.1235)(231.0814, 6502.29)(264.11356, 9962.22)(264.6678, 1515.4554)(263.72073, 406.034)(244.88852, 11286.481)(247.10379, 2710.155)(267.32077, 5230.275)(271.0708, 13691.83)(249.25348, 8751.857)(253.05951, 1489.505)	15.2137
CPD-15300	3146901	2821775	3279310	3340320	707121	685222	584674	2837386	616613	2057873	1	491855	578460	2458999	2638948	597707	2746676	2712066	2119671	788518	518974	2070919	1808650	3552476	1	554318	893926	247934	1894057	2260381	229460	301479	CPD-15300	CPD-15300 [ C33 H31 N2 O15, tgt=66.16, overall=66.16 ]			(697.177, 4200.8774)(698.17944, 1305.0375)(697.3564, 9361.735)(698.19147, 3578.4734)(699.19403, 537.0443)(695.1943, 9589.867)(696.1966, 4395.966)(719.1598, 69120.96)(720.16364, 37595.855)(721.1664, 9749.342)(722.16895, 2132.69)(703.1646, 213.89)	21.3636
CPD-17638	372566	729342	322579	271724	1437599	236477	398205	234065	822103	457162	919393	272752	260767	861369	935252	962757	1	898633	159904	855703	1107546	688190	256774	938400	1	544109	617588	1508960	1	145264	127177	396150	CPD-17638	CPD-17638 [ C33 H54 N7 O18 P3 S, tgt=60.07, overall=60.07 ]			(961.5083, 4806.1934)(962.5693, 1421.2301)(965.2502, 1999.9967)(945.38947, 731.9386)(945.2463, 7278.205)(946.2488, 2822.93)(963.056, 6926.397)(964.2576, 4848.7666)(965.2547, 2789.0442)(966.76685, 445.31253)(968.60114, 850.77997)(946.08575, 3042.1875)(946.7462, 1239.36)(982.7784, 854.01495)(983.2712, 1654.31)(965.48145, 1057.175)(968.2795, 1236.0533)(987.44684, 4815.5645)(989.00574, 3851.1667)(991…	11.243
CPD-17633	436455	246523	806391	352191	349827	346475	318612	346373	272622	1	1	138087	109848	1	130812	296549	654227	1	1	824470	1	1	1	190811	228829	1	173369	1	223201	144531	176364	1	CPD-17633	CPD-17633 [ C43 H72 N7 O18 P3 S, tgt=50.02, overall=50.02 ]			(1099.6641, 1763.1465)(1100.6708, 594.0118)(1101.3835, 175.35)(1088.3845, 222.85)(1101.8851, 1090.4408)(1105.39, 578.0733)(1107.3938, 314.43)(1087.2023, 278.89996)(1088.3909, 364.14)(1118.3728, 417.8625)(1120.0917, 844.56665)(1121.929, 1908.78)(1122.9302, 3066.35)(1123.9268, 1885.62)(1104.3708, 825.9818)(1105.3783, 274.05112)	4.40119
CPD-12403	1999115	1705294	3014393	2907522	2410240	1	2764977	3194822	2217376	1266529	2253000	2345404	2454381	2279887	1	1943642	1	5891605	1796260	2801486	1428347	1	1	1628761	1194559	1	1	1316216	1054302	1775590	843895	3362881	CPD-12403	CPD-12403 [ C14 H27 N3 O4 S2, tgt=57.20, overall=57.20 ]			(365.83575, 763.5192)(368.1405, 336.95)(348.0498, 78065.71)(350.12967, 48660.81)(351.27304, 7870.243)(353.1311, 1091.19)(368.19766, 1715.7146)(369.87756, 675.4455)(351.14163, 37740.9)(353.13916, 6866.1465)(354.1382, 1331.49)(385.81543, 7565.1235)(387.96786, 6940.5767)(389.024, 2928.1494)(389.1796, 1549.5)(368.21857, 5489.707)(370.2527, 55726.83)(370.91953, 83185.97)(390.5642, 4028.3687)(393.63516…	8.90194
CPD-12404	18072080	17646884	25714698	30273660	1	17618234	50805204	19610460	8558192	53392824	52676212	21240710	39685768	1	43262528	1	45845312	21148368	40854324	45931720	24013518	23821216	12996799	1	19063788	26832646	31961156	19923064	32562424	36525528	1	22332936	CPD-12404	CPD-12404 [ C10 H21 N O2 S, tgt=71.84, overall=71.84 ]			(224.01807, 40913.37)(206.00383, 10870.485)(206.11946, 13014.867)(220.13597, 138101.47)(202.12494, 451585.12)(203.12852, 41927.28)(239.16167, 10000.704)(240.32796, 4950.5435)(241.16644, 9894.04)(220.15446, 283316.75)(222.9789, 46574.918)(223.155, 24014.35)(242.4126, 2163.4856)(224.93855, 1556.438)	24.7351
LOGANATE	11650768	1308394	13584802	15448002	15243481	1351943	1102104	16117700	1	1	1	13788579	15148398	12824646	16084289	11797205	7736465	6746703	12983141	15779049	721424	1	12069175	13313553	1	10829726	1	1	11023640	15263827	932134	1695123	LOGANATE	LOGANATE [ C16 H23 O10, tgt=63.09, overall=63.09 ]			(376.1264, 5889.9)(379.1391, 1779.22)(357.36044, 9949.359)(358.2787, 2113.6978)(360.62296, 194.31)(379.3484, 6600.786)(358.69635, 3403.8657)(359.1206, 577.5334)(397.08463, 6882.1846)(397.1684, 7854.43)(375.14865, 375572.8)(376.15042, 81480.94)(399.1205, 1254.39)(400.1243, 180.88)(380.1037, 37163.99)(381.106, 7931.68)(382.1118, 873.87897)	12.0552
S-ADENOSYL-4-METHYLTHIO-2-OXOBUTANOATE	8519691	8328355	10373471	9826488	8735826	9147616	9110672	8718720	8531944	5971308	8033796	8560285	9617997	7805038	9318182	8572031	9400779	9399936	7193898	10885887	3034759	3320813	3779046	3880128	3987131	3306332	3773121	3440774	3319125	4770358	1	6076887	S-ADENOSYL-4-METHYLTHIO-2-OXOBUTANOATE	S-ADENOSYL-4-METHYLTHIO-2-OXOBUTANOATE [ C15 H19 N5 O6 S, tgt=90.43, overall=90.43 ]			(401.00983, 2463.6074)(402.7872, 4649.7446)(403.73834, 3178.62)(404.12387, 1135.6967)(381.45483, 14694.982)(382.5223, 7167.9316)(384.8929, 144046.2)(386.1127, 32057.309)(415.139, 221444.86)(416.14087, 36785.844)(417.1448, 4836.173)(398.174, 1561.9021)(399.17258, 6919.639)(400.126, 1587.7269)(425.1026, 269.51437)(402.0862, 169.86)	17.9362
CPD-12405	22102000	22267478	26785364	2441807	26589882	29405826	24490532	24115318	33240742	1	22357148	3879852	23847170	3154867	4457748	26311962	1	22646712	4653380	19082912	19694148	27551606	19533052	17417238	19466592	21338268	22906808	19849022	20618810	25843576	14569128	11357587	CPD-12405	CPD-12405 [ C20 H35 N4 O7 S2, tgt=82.61, overall=82.61 ]			(508.6157, 4570.066)(509.68915, 4131.6953)(489.38614, 5167.787)(492.93173, 37759.062)(495.18408, 163205.11)(508.20047, 4202.307)(509.2005, 1967.6061)(510.2035, 769.36)(490.19232, 48244.758)(491.20047, 15141.863)(492.1935, 149.93)(526.2297, 344379.97)(527.2311, 106573.21)(528.23206, 34712.016)(529.2317, 7955.089)(530.235, 2776.76)(509.6821, 6100.275)(511.15704, 6819.513)(511.21802, 3018.6582)(530.…	11.2047
CPD-12406	2703476	1	3682982	3897416	3965306	9849817	6008920	4203269	4654969	2341385	3463339	5224841	5536577	5133201	7303422	3015838	7229721	3002123	2363291	8850465	2323812	5495874	5620810	5947652	5523519	4578337	4909482	4946242	4477243	5775924	4058507	6775518	CPD-12406	CPD-12406 [ C15 H29 N3 O4 S2, tgt=71.37, overall=71.37 ]			(379.15704, 58138.3)(380.2734, 9267.383)(381.16238, 2462.5625)(362.18448, 9276.686)(362.99213, 11023.116)(382.60025, 7594.525)(383.83426, 27375.031)(365.1242, 3498.1143)(366.3311, 2844.7854)(367.15744, 1727.7288)(368.1568, 411.82)(398.2695, 9412.697)(400.71625, 32239.324)(402.69232, 946.97003)(380.3853, 6566.081)(403.6068, 5412.1357)(405.15094, 4847.718)(386.7233, 1902.58)(387.87347, 2967.1687)(3…	8.71662
CPD-12420	148533	186169	183719	185429	172430	164786	140164	135244	145770	1	112178	123424	173743	107471	145946	165581	173558	166460	1	168235	108868	168563	304170	259660	113052	340378	322113	227352	196053	271661	236792	253908	CPD-12420	CPD-12420 [ C18 H24 N O11 S2, tgt=63.68, overall=63.68 ]			(497.08615, 4033.7021)(496.092, 238.87)(497.0873, 4474.44)(513.68085, 3337.2097)(515.11566, 1673.6173)(517.4805, 6067.6675)(518.11743, 17924.486)(500.10483, 4740.139)	18.8528
GERANIOL	11264122	8202589	10726762	18181728	13234646	7431180	8104323	7587213	7546815	3605558	7798748	19267312	17055840	5310939	7086154	7040425	18979906	5841882	6103678	9964076	10857539	7232031	10405475	10152135	10921085	8138430	8889298	7252176	9657365	13674288	9265710	9449706	GERANIOL	GERANIOL [ C10 H18 O, tgt=99.65, overall=99.65 ]			(159.15518, 1140.332)(137.13243, 406608.53)(138.13539, 42513.69)(139.1386, 2157.624)(154.159, 37878.227)(155.16212, 3875.4932)	19.3671
CPD-9618	6452020	8084511	7565429	7202031	7107542	6803320	6128625	5912350	6096009	3358494	4216740	5535176	7140393	4253209	5163882	6065638	5984986	7923283	3467731	7552616	21084292	27972324	32998612	38241400	29491964	27958652	38991048	20312336	31131794	24193516	23372696	25587864	CPD-9618	CPD-9618 [ C16 H12 O5, tgt=99.23, overall=99.23 ]			(285.07645, 707038.7)(286.07965, 118645.66)(287.0823, 16840.521)(288.0862, 575.58)(271.07916, 1050.43)(303.0691, 1237.4993)(304.77805, 214.33667)(308.63507, 2275.194)(312.0697, 860.166)	21.8545
GAMMA-LINOLENOYL-COA	4741192	4444102	1	5297513	1	1767396	1	1	1	1	1	1	1391361	1220534	1	1071366	1	1	744866	1	709982	940583	250481	368942	451743	375790	1	1	191199	1	291643	292476	GAMMA-LINOLENOYL-COA	GAMMA-LINOLENOYL-COA [ C39H60N7O17P3S, tgt= ]			(1010.30865, 1458.975)(1011.3056, 2320.0)(1012.3106, 4503.01)(1006.934, 5639.396)(1008.19617, 5135.1987)(1008.97516, 436.08334)(1041.5925, 1366.6549)(1044.3464, 1970.81)(1045.3452, 917.76)(1047.3531, 381.29)(1048.355, 617.75)(1025.6619, 2642.9067)(1027.5876, 736.24)(1026.32, 509.01)(1027.3242, 361.23)(1030.3209, 1442.04)(1053.1426, 5537.969)(1053.3098, 2514.6)	28.9084
CPD-12423	123698	116990	150246	161296	142413	165194	170497	167521	1	1	1	1	112794	130988	139520	126539	93887	1	108979	1	1	1	1	143135	1	238214	141393	1	1	166315	160330	177168	CPD-12423	CPD-12423 [ C22 H28 N O14 S2, tgt=55.74, overall=55.74 ]			(578.1962, 4776.4316)(578.08765, 1066.5286)(595.1097, 850.01)(580.29083, 636.38)(595.12354, 1964.895)(599.08167, 503.015)	13.2679
CPD-9619	4810641	7104803	8078380	6845721	4960597	5244720	5358976	4857910	4880639	3022967	4389806	4970778	7171082	4178924	5361902	4417750	7322146	6761369	3823600	10891887	6948423	7693726	8297740	12630767	5840456	6843498	7580024	5076551	9509793	8135075	5756219	8424791	CPD-9619	CPD-9619 [ C16 H11 O7, tgt=98.24, overall=98.24 ]			(315.05066, 269102.3)(316.05374, 43282.496)(317.0561, 7102.26)(318.05896, 419.165)(333.66, 303.0357)(338.0361, 848.7791)	21.4036
CPD-12422	476694	450506	663075	456006	1	253395	1	1	350587	115952	1	1	220719	1	1	134904	495025	1	1	391166	1	1	1	1	1	1	1	1	1	179724	1	1	CPD-12422	CPD-12422 [ C22 H30 N O14 S2, tgt=44.82, overall=44.82 ]			(582.9583, 146.48286)(581.5056, 524.208)(618.51996, 1802.7426)(620.55084, 663.77997)(597.8101, 4239.397)(603.1351, 101.45)(604.0928, 2858.74)(602.0923, 511.07)	13.7732
CPD-9616	8697806	8524306	10760594	11662851	8717124	9075345	10614698	10705874	10824173	5112089	6207217	7289335	14865264	6260812	11382118	13043941	13185101	16622276	5484823	14390530	11611483	13295303	14981318	19744252	13920401	15946226	13717184	1	15813175	30325800	10799774	11420353	CPD-9616	CPD-9616 [ C17 H14 O6, tgt=98.38, overall=98.38 ]			(314.07904, 240978.62)(315.08295, 48442.93)(316.08557, 7002.503)(317.08752, 339.0273)(296.06836, 60438.363)(297.0722, 11398.613)(298.07584, 1352.8799)(299.08942, 235.29001)(315.08685, 274243.5)(316.0899, 49996.87)(317.09296, 7419.322)(318.09723, 716.3188)(332.59622, 211009.48)(333.36475, 24242.89)(334.11542, 1737.4596)(317.1141, 191.31)(337.1378, 1666.474)(338.0648, 272.77)	22.2746
CPD-9617	1486585	1116959	1704727	1541203	1019609	1182148	1541054	1305311	1365927	558331	1026374	1318029	1422089	900763	938102	904644	27930476	1522066	915673	2028414	3016306	1	5344303	1	3841332	1	3646854	3770272	1	1	1	1	CPD-9617	CPD-9617 [ C16 H12 O6, tgt=98.23, overall=98.23 ]			(301.07123, 121250.46)(302.07434, 20249.746)(303.0761, 2736.8713)(304.0809, 3262.22)(319.4223, 2871.2544)(304.0975, 1403.77)(323.0532, 1298.45)	18.9659
CPD-9615	21780192	1	27669408	57327696	22112652	1	1	21281232	21551980	29546904	1	44134808	1	39354092	45344284	1	52169044	50200296	35180484	1	62712136	1	1	74910872	1	1	1	50450348	66948636	61813808	50846676	1	CPD-9615	CPD-9615 [ C17H13O7, tgt= ]			(329.12537, 10708.41)(330.07385, 108585.48)(331.0781, 26090.885)(332.0825, 4174.5107)(312.06345, 38001.355)(313.06763, 8023.5586)(314.07266, 950.9786)(348.15683, 1593953.0)(348.10602, 263985.88)(349.10858, 24026.021)(350.11322, 2372.61)(329.0858, 4011.84)(352.0557, 7217.686)(353.0591, 2177.9277)(354.06262, 444.63)	20.4803
CPD-10077	3630719	1750764	3349611	3565149	3197558	3390685	1765857	3637030	6310690	4139853	6074034	5932527	8098948	2595301	4189901	4324109	1	4624507	2591802	4378251	2447850	2913140	4658712	2861696	1	2870327	3386777	2101003	2054614	3473885	3864532	4071786	CPD-10077	CPD-10077 [ C23 H24 O10, tgt=56.04, overall=56.04 ]			(460.1365, 6711.63)(461.14145, 1494.595)(462.151, 277.44)(442.9597, 965.29834)(448.1365, 539.61)(465.01593, 1803.6371)(465.152, 1122.68)(466.1614, 6188.52)(446.94556, 12401.373)(448.14145, 78893.14)(449.14392, 24107.834)(481.84927, 134618.73)(483.0386, 34020.53)(484.1852, 1296.98)(463.48593, 1117.539)(464.17383, 738.6763)(471.1329, 638.49335)	15.3905
PROTOPINE	14014421	1	18569136	15355977	1	1	47232328	1	50041200	1	1	1	1	1	1	1	1	1	10253161	1	27655868	2523325	26906992	10606003	21210906	1883351	24666234	1	9759743	1	22448042	9369582	PROTOPINE	PROTOPINE [ C20 H19 N O5, tgt=64.83, overall=64.83 ]			(357.13232, 2021.6602)(357.1442, 37151.05)(358.14917, 7624.7896)(340.75363, 17395.676)(341.13574, 2090.87)(374.50253, 1608.7233)(376.1735, 645.42)(354.1488, 3961.58)(354.1454, 987.36)(376.4763, 883448.4)(377.1137, 169368.84)(378.1164, 20699.244)(379.1193, 2068.5571)(359.56662, 83504.89)(361.11996, 18000.719)	16.1676
2-AMINOBENZOYL-COA	477045	263325	1014813	294056	415541	767702	153822	1	127934	1	1	150207	159928	469858	273884	286875	1	166518	227676	1	154490	154691	1	1	1	323584	385083	1	1	1	1	1	2-AMINOBENZOYL-COA	2-AMINOBENZOYL-COA [ C28 H37 N8 O17 P3 S, tgt=15.79, overall=15.79 ]			(868.1093, 1672.9766)(910.1235, 2647.1692)(911.1247, 1151.84)(865.1279, 682.74664)(885.1231, 141.7)(886.1325, 132.4)(888.1101, 4494.034)(889.1131, 1217.8099)(882.1525, 157.08)	27.6376
CPD-9610	8218001	13213503	8903165	5605873	12386993	330331264	20172584	1	1109482	123492416	111282656	29869370	3202978	2407773	81832848	7092988	1	1464668	1697623	9371552	1	5114486	8663227	194494656	32129812	4924986	8260551	58138084	1990876	77935072	44197000	41414020	CPD-9610	CPD-9610 [ C50 H81 O7 P2, tgt=59.35, overall=59.35 ]			(857.93427, 30143.986)(859.1089, 16917.416)(859.9877, 33377.52)(861.5711, 62781.21)(839.70776, 8164.0684)(841.0464, 7488.533)(841.30255, 2354.3325)(841.5466, 1282.98)(842.5563, 10088.09)(860.49677, 47419.812)(860.90063, 52520.777)(861.9728, 69836.086)(862.07184, 52558.938)(862.5726, 19923.23)(841.7784, 7947.083)(842.8855, 10125.022)(844.3206, 46418.76)(844.5714, 38717.89)(874.42596, 11860.638)(87…	27.3119
CPD-17623	24313270	35583328	34792196	20700570	29810366	22954830	1	21346028	292767	14957744	227194	247562	25926772	14395139	21899928	24069322	6160523	346798	13858337	304490	13075426	14776770	21178180	16713549	13089419	26726984	25168292	10135175	10150864	17823640	13934796	21115534	CPD-17623	CPD-17623 [ C39H62N7O18P3S, tgt= ]			(1041.3219, 311.106)(1042.3192, 5888.312)(1043.322, 2383.1223)(1024.3083, 1241.7561)(1065.286, 248159.11)(1066.2891, 136969.56)(1067.2914, 47472.07)(1068.2938, 12949.313)(1069.2935, 3133.4084)(1070.2948, 50.47)(1050.3058, 672.4314)(1051.309, 342.71466)(1052.3116, 239.975)	13.4627
GLC-D-LACTONE	831714	966980	1069018	1075943	971109	1161069	1154030	1023526	1079131	1	434823	1083166	1184703	923354	1240720	1078478	1216611	673515	736189	1062354	1029852	1	1	1	1	1055478	1	1	1330022	1	1	1855157	GLC-D-LACTONE	GLC-D-LACTONE [ C6 H10 O6, tgt=82.03, overall=82.03 ]			(180.13312, 1270.6575)(161.0417, 1563.6901)(181.0613, 362.75)(165.05388, 2248.839)(196.27028, 2304.2131)(197.0929, 223.89)(181.53365, 1652.1708)(182.0807, 2278.28)(201.03787, 62311.574)(202.04068, 7778.144)(203.03477, 2290.3574)(188.03821, 327.43997)	15.7419
CPD-17621	1	3510540	2385032	374223	1828569	1661097	323131	343917	315950	338301	460165	484469	405986	1	143368	231895	418475	1	176981	255504	315847	701682	1	1	405973	1	272910	1	1	1	218167	255535	CPD-17621	CPD-17621 [ C37 H62 N7 O18 P3 S, tgt=59.46, overall=59.46 ]			(1019.22406, 2306.3564)(1018.3153, 1534.16)(1001.0585, 3967.0176)(1002.059, 6369.485)(1004.05963, 885.4775)(1005.5594, 1105.345)(1005.3059, 2099.66)(1006.3087, 3266.6)(1018.9199, 2372.4932)(1001.77716, 12215.288)(1002.54297, 29388.514)(1003.7086, 2139.085)(1005.3073, 5552.802)(1006.05835, 12043.3955)(1006.90704, 10667.367)(1007.3063, 7049.395)(1037.9144, 729.3229)(1042.3525, 270.83)(1017.42706, 3…	24.7042
CPD-17627	2815890	165319	2423876	3524967	1	145541	1262522	947632	698110	159807	129715	339609	831753	668510	147368	856681	353837	212361	495763	193566	1930470	1130960	1	1	1	1	1	1263753	1	1362621	1	951827	CPD-17627	CPD-17627 [ C37 H62 N7 O19 P3 S, tgt=41.05, overall=41.05 ]			(1034.3114, 5016.38)(1035.3151, 2401.7732)(1036.3164, 632.61005)(1019.3722, 2749.3228)(1021.10266, 527.116)(1035.318, 1017.5366)(1037.329, 1920.75)(1038.3301, 2557.05)(1017.20526, 11850.545)(1018.3723, 2609.8164)(1020.81274, 150.73001)(1022.307, 70.62)(1054.1409, 610.968)(1055.67, 2506.14)(1056.6808, 1133.65)(1035.2201, 1923.2188)(1058.8036, 3443.3958)(1060.1825, 3095.0151)(1060.9789, 1736.06)(10…	25.5933
EDTA	1536286	1	2211328	1615074	1739688	7984170	1383851	6180778	1	658506	1	1890251	5216848	2778110	5598014	2773056	4242356	775555	2075525	2375991	952705	1302274	1663387	1874146	1307275	2312558	1809345	1091067	1582812	1	1	1801633	EDTA	EDTA [ C10 H14 N2 O8, tgt=70.23, overall=70.23 ]			(291.32907, 9347.796)(291.08, 1535.464)(272.37204, 64487.797)(273.06714, 10121.103)(274.06824, 748.1544)(291.08432, 101913.53)(292.0884, 12347.581)(293.0845, 6830.94)(277.0832, 4515.896)(311.74368, 3030.5598)(313.1227, 753.2234)(293.2375, 1574.5854)(295.1068, 723.65)(314.7691, 2016.8596)(315.06952, 4889.3916)(316.0732, 406.5167)(297.05737, 3842.38)(298.0588, 242.33)	12.6292
CPD-12417	1069500	1178527	1357870	967560	753398	618052	1039295	679172	1219927	446548	606553	1325059	595685	557867	640990	607681	1120766	1019851	823220	1677383	587694	487785	1140362	747695	406467	1204072	1469166	1048301	540189	734487	669097	1255954	CPD-12417	CPD-12417 [ C21 H28 N O14 S2, tgt=42.02, overall=42.02 ]			(605.1271, 846.89)(587.09955, 4827.268)(588.1034, 1181.7178)(587.06665, 294.405)	15.676
CPD0-2023	135800	1114471	1	1551257	1	1	1131953	750354	710025	1	1	446315	773657	247244	262074	1	962121	1	1	1535562	851990	903173	979653	1279341	664316	836957	1	1028269	821817	877717	1115563	1853352	CPD0-2023	CPD0-2023 [ C6 H11 N O4 S, tgt=59.03, overall=59.03 ]			(176.0309, 7777.03)(178.0293, 400.53)(197.04893, 3517.071)(199.04836, 1620.8267)(176.03905, 1119.2517)(211.90807, 43062.695)(213.01129, 8282.255)(213.07121, 3303.9382)(193.52708, 6024.2363)(198.06744, 5151.22)(219.32883, 134377.84)(220.03139, 12093.653)	12.3693
CPD-9627	1486585	1116959	1704727	1541203	1019609	1182148	1541054	1305311	1365927	558331	1026374	1318029	1422089	900763	938102	904644	27930476	1522066	915673	2028414	3016306	1	5344303	1	3841332	1	3646854	3770272	1	1	1	1	CPD-9627	CPD-9627 [ C16 H12 O6, tgt=98.23, overall=98.23 ]			(301.07123, 121250.46)(302.07434, 20249.746)(303.0761, 2736.8713)(304.0809, 3262.22)(319.4223, 2871.2544)(304.0975, 1403.77)(323.0532, 1298.45)	18.9745
CPD-9628	1486585	1116959	1704727	1541203	1019609	1182148	1541054	1305311	1365927	558331	1026374	1318029	1422089	900763	938102	904644	27930476	1522066	915673	2028414	3016306	1	5344303	1	3841332	1	3646854	3770272	1	1	1	1	CPD-9628	CPD-9628 [ C16 H12 O6, tgt=98.23, overall=98.23 ]			(301.07123, 121250.46)(302.07434, 20249.746)(303.0761, 2736.8713)(304.0809, 3262.22)(319.4223, 2871.2544)(304.0975, 1403.77)(323.0532, 1298.45)	18.9745
CPD-9629	8697806	8524306	10760594	11662851	8717124	9075345	10614698	10705874	10824173	5112089	6207217	1	1	1	1	1	1	1	1	1	11611483	13295303	14981318	19744252	13920401	15946226	13717184	1	15813175	30325800	10799774	11420353	CPD-9629	CPD-9629 [ C17 H14 O6, tgt=98.38, overall=98.38 ]			(314.07904, 228321.98)(315.08304, 46868.44)(316.08566, 6891.049)(317.0872, 278.04428)(296.0683, 56120.31)(297.07227, 10688.496)(298.0759, 1201.472)(315.08682, 307478.28)(316.08984, 56991.523)(317.093, 8356.8955)(318.09738, 858.4284)(332.6631, 215746.72)(333.11392, 27307.188)(334.1149, 1579.3087)(317.1141, 191.31)(337.1718, 1162.4)	20.9151
CPD-17607	3546913	1	8905796	3596921	1	4354929	6880121	6637176	1	1	1	4919483	3773139	3586156	5311570	1	8516067	1	3776254	15794587	7045421	10163376	11064595	12665839	5256494	1	4749184	10478268	9089040	9968107	3750229	22442330	CPD-17607	CPD-17607 [ C17 H16 O2, tgt=78.54, overall=78.54 ]			(253.52121, 5152.936)(257.1302, 541.65875)(254.1259, 7997.307)(257.1308, 518.79)(235.11177, 10071.337)(236.11777, 1683.5618)(271.30518, 30687.33)(271.13776, 1771.5801)(272.1432, 1236.57)(252.8482, 9521.945)(275.98322, 3464.5217)(277.10657, 4204.615)	23.8905
CPD-9623	1486585	1116959	1704727	1541203	1019609	1182148	1541054	1305311	1365927	558331	1026374	1318029	1422089	900763	938102	904644	27930476	1522066	915673	2028414	3016306	1	5344303	1	3841332	1	3646854	3770272	1	1	1	1	CPD-9623	CPD-9623 [ C16 H12 O6, tgt=98.23, overall=98.23 ]			(301.07123, 121250.46)(302.07434, 20249.746)(303.0761, 2736.8713)(304.0809, 3262.22)(319.4223, 2871.2544)(304.0975, 1403.77)(323.0532, 1298.45)	18.9745
CPD-17606	3546913	8346359	8905796	3596921	4322408	4354929	6880121	6637176	1	3250824	1782932	4919483	3773139	3586156	5311570	1	8516067	1	3776254	15794587	7045421	10163376	11064595	12665839	5256494	1255966	4749184	10478268	9089040	9968107	3750229	22442330	CPD-17606	CPD-17606 [ C17 H16 O2, tgt=78.54, overall=78.54 ]			(254.00204, 4711.787)(257.13016, 1435.4332)(235.61035, 2081.9)(254.49141, 6495.6543)(256.46664, 1247.3433)(235.3349, 9742.215)(236.11772, 1756.9574)(271.2941, 28768.016)(271.13776, 1771.5801)(272.1432, 1236.57)(252.71272, 8185.973)(276.03714, 3948.2424)(277.10846, 3617.1465)	21.5291
CPD-9625	1160261	1266502	1697972	1519904	1	1	1768359	1439366	1262409	1	807727	967712	1	786939	1036785	958661	22281552	1427792	1	1770904	4504779	8609269	6425894	7378617	5643871	3814529	4522387	1	8253211	6046136	5641643	7586214	CPD-9625	CPD-9625 [ C15 H10 O5, tgt=98.54, overall=98.54 ]			(270.05417, 748.11426)(271.0606, 217481.84)(272.06378, 36200.86)(273.06644, 4685.0703)(274.0695, 833.06665)(288.6662, 5629.887)(275.08905, 338.2383)(295.7195, 1472.5599)	18.7778
CPD-9620	1985227	426958	2615387	1368332	1186771	1009818	646423	1052440	914613	1131191	1800398	1263169	1193444	736619	839716	787669	3256043	349019	938216	827522	893457	843786	2143941	1328355	648076	1031529	1184041	2355106	560290	1260206	1366417	1155139	CPD-9620	CPD-9620 [ C15 H10 O7, tgt=96.13, overall=96.13 ]			(303.05035, 42055.152)(304.05377, 6436.7007)(305.06122, 711.8427)(325.09326, 5327.1055)(329.04675, 480.47)	13.3755
CPD-9621	1070910	2721790	1238094	915976	2111133	1182177	1604666	968912	1001555	789494	606874	1623921	1256768	1136841	931168	639284	1185820	870156	908595	2915225	1253809	727128	804433	933272	753294	989227	610537	824978	575768	775547	840270	443113	CPD-9621	CPD-9621 [ C18 H14 O8, tgt=84.00, overall=84.00 ]			(381.0584, 30987.568)(382.06174, 6507.89)(383.0677, 718.43494)(341.06613, 7932.5923)(342.0695, 10882.33)(343.0728, 1022.38)(358.94156, 6848.704)(377.10617, 4573.652)(377.10556, 3837.24)(359.0767, 16935.273)(360.08023, 4017.1177)(367.06284, 1028.0032)(362.1008, 2273.7505)(362.8537, 1109.56)	13.5575
CODEINONE	2587788	2817352	3011737	1330616	4588862	3630615	4671433	3341748	2724520	1	1	1	1	1	1	1	1	1	1	1	1	1	1	1	1	1	1	1	1	1	1	1	CODEINONE	CODEINONE [ C18 H20 N O3, tgt=66.11, overall=66.11 ]			(282.91858, 1501.5133)(284.36615, 6035.453)(285.14624, 1171.548)(281.141, 85.09)(299.16928, 10236.064)(321.13538, 23436.092)(322.13962, 2237.551)(323.14502, 254.70999)(303.12396, 9232.107)(304.129, 87.083336)	4.144
CPD-17610	1242972	2268063	1528172	15763748	15525171	1443369	1301370	3176118	1653138	2034956	2471629	1334794	8643062	13905947	13125840	1594625	1	1222758	1136293	12448684	16017607	3840167	5087536	5079485	3877436	4786589	1	4938085	4998240	4992219	4885427	4534415	CPD-17610	CPD-17610 [ C18 H16 O4, tgt=60.92, overall=60.92 ]			(297.69757, 2506.9314)(279.09412, 143343.95)(280.09772, 54675.59)(281.2554, 6057.9766)(282.10352, 363.425)(297.61322, 1682.2583)(299.61813, 2047.4698)(282.1094, 369.07)(314.13947, 177202.98)(315.1445, 35608.145)(316.15234, 5118.92)(299.36182, 1427.5801)(301.1426, 462.25)(322.94492, 2974.8904)(303.089, 576.03)	17.9255
CPD-17611	1678398	1	1	1231426	1669534	1	1	1	1	1	1850189	1810907	2510292	1	903509	2167783	1	1	1	2915599	1103553	749368	1	1710868	1064538	986509	1	1109327	1032291	1103803	1238603	1739512	CPD-17611	CPD-17611 [ C22H22O10, tgt= ]			(447.98563, 1631.1141)(449.1241, 639.1)(429.83075, 640.99005)(430.61627, 322.215)(431.1167, 627.67)(448.41968, 5638.7124)(448.13275, 545.94)(431.7909, 792.4467)(466.5889, 3384.8257)(467.9693, 1846.974)(469.1694, 12856.934)(470.1722, 3525.21)(450.2464, 6198.172)(449.15363, 2262.1802)(472.11652, 268.135)(451.4554, 52752.168)(452.1006, 18113.05)	13.5628
CPD-17614	18515068	1	29079954	15397313	28560512	11246719	18849376	1	1343333500	1	1007958780	1	1	1	1	1	135941024	1	1	1	24934160	47573904	39326224	36779500	31099854	27149788	29410822	17740462	32929650	42392096	1	34488024	CPD-17614	CPD-17614 [ C18 H29 O3, tgt=97.48, overall=97.48 ]			(293.36218, 1006071.6)(294.36508, 188233.16)(295.21817, 29018.443)(275.1979, 8257252.0)(276.2009, 1313182.6)(277.20343, 162039.8)(278.20514, 12084.709)(297.23114, 12735.324)(280.9901, 4197.9336)(281.2213, 7095.91)(312.2508, 10110.455)(294.57574, 7700.717)(297.2428, 672.21)(316.80566, 88402.32)(317.87314, 248659.56)(298.18826, 30543.24)	23.2788
CPD-19784	2972818	7969697	2927048	3152952	4084473	5109221	5075376	6185088	4316544	2002399	2193239	4104831	6162519	1	4336557	7123382	2318585	5646701	3880226	2972909	2945302	6204973	2482597	1928068	3804214	3259143	2426124	2228525	3394943	6658497	11582247	10294729	CPD-19784	CPD-19784 [ C11 H14 O4, tgt=98.80, overall=98.80 ]			(211.91046, 1405.3119)(212.0909, 2253.89)(196.72214, 1639.7096)(197.0938, 2561.47)(211.6592, 16448.543)(212.76204, 8544.978)(193.08635, 214390.28)(194.08954, 25348.812)(195.08734, 2000.6934)(232.13574, 45121.344)(233.1341, 15113.33)(210.94212, 9535.958)(211.1119, 344.75)(233.28935, 1068.7853)(218.2398, 22359.14)(220.07826, 24100.314)	15.5855
CPD-17616	6452020	8084511	7565429	7202031	7107542	6803320	6128625	5912350	6096009	3358494	4216740	5535176	7140393	4253209	5163882	6065638	5984986	7923283	3467731	7552616	21084292	27972324	32998612	38241400	29491964	27958652	38991048	20312336	31131794	24193516	23372696	25587864	CPD-17616	CPD-17616 [ C16 H12 O5, tgt=99.23, overall=99.23 ]			(285.07645, 707038.7)(286.07965, 118645.66)(287.0823, 16840.521)(288.0862, 575.58)(271.07916, 1050.43)(303.0691, 1237.4993)(304.77805, 214.33667)(308.63507, 2275.194)(312.0697, 860.166)	21.8545
CPD-16891	29191032	1	1	22364132	2071093	10699838	97458080	1	1	1	1	946103	1	2987109	1	2100187	1	1346232	1	1	1147790	1	1	1	1	1	1	1	47162768	45643940	62904592	171615792	CPD-16891	CPD-16891 [ C6 H14 N O4, tgt=82.87, overall=82.87 ]			(165.23544, 307627.1)(166.60255, 7351.065)(146.07939, 26115.81)(147.08185, 3240.4248)(148.07364, 224.86499)(166.70285, 9481.248)(149.09459, 6643.348)(184.06047, 70629.35)(184.132, 95140.35)(166.12207, 169880.81)(167.1247, 13277.75)(189.80197, 31466.723)(190.51637, 9319.25)(172.2588, 4797.117)(173.07924, 3864.6165)	15.9732
NARINGENIN-7-O-BETA-D-GLUCOSIDE	804702	959827	931217	830279	1157229	580206	768707	587830	895995	1	1	1	71030200	39489824	1	60805256	8969036	51158252	55704084	1	23112492	19415256	25620892	19028376	24735610	25786560	16824280	798614	24355772	28758564	939877	1	NARINGENIN-7-O-BETA-D-GLUCOSIDE	NARINGENIN-7-O-BETA-D-GLUCOSIDE [ C21 H22 O10, tgt=97.98, overall=97.98 ]			(435.1286, 11826.1)(436.1326, 1522.8)(417.9719, 4055.5583)(419.1186, 5678.83)(421.1199, 8205.62)(435.1274, 1052128.6)(436.13065, 211698.3)(437.13202, 61335.58)(438.13498, 9046.734)(419.5615, 2777.5173)(420.79724, 13583.13)(421.1249, 12252.96)(455.80487, 36504.004)(453.16544, 367.95334)(438.57928, 3770.4478)(457.2637, 19671.273)(458.97363, 2197.5999)(461.12286, 2787.21)(441.77563, 617.26)(444.1107…	14.4279
CPDQT-425	1540054	2857825	1773854	998086	1974482	1	2487390	1524320	3821959	2554254	2669250	3519885	2041978	1452305	1688942	2787992	1100934	3671092	1647346	2513877	2227321	3361591	5990012	2742301	3801169	6204636	6237684	5424305	2796248	3107679	2615026	4103975	CPDQT-425	CPDQT-425 [ C19 H23 N4 O6 S, tgt=69.76, overall=69.76 ]			(435.473, 4538.9653)(436.7982, 5093.817)(423.1239, 6207.93)(437.44073, 3565.209)(442.1524, 145.34)(420.2581, 100413.31)(421.1325, 22691.564)(422.13794, 6934.923)(423.1408, 1157.28)(453.80206, 772.3542)(455.1708, 9988.68)(456.1701, 4277.26)(438.51303, 24319.516)(439.8881, 4809.144)(439.1623, 2674.145)(461.35706, 3572.1409)(462.5135, 6994.095)(463.12643, 3519.0327)(443.66592, 2010.4075)(444.32867, …	13.9542
B-ALANINE	3996226	1	5464397	4957502	1	1	1	1	1	2326557	1	1	1	1	1	1	1	1	1	1	1	4999329	6243088	6184655	1	5296101	4769411	4624660	5158422	1	697336	1	B-ALANINE	B-ALANINE [ C3H7NO2, tgt= ]			(110.339195, 23152.604)(111.0913, 25218.807)(113.03981, 494.346)	13.8932
CPDQT-426	1459556	884527	733245	1524435	1	2236165	2400826	2111906	1232964	434766	1	1	1	1	1028654	1	4893780	1	1217459	1	438905	1	934815	1247296	910857	1	1	1	1249557	1	1709022	562459	CPDQT-426	CPDQT-426 [ C15 H15 N O6, tgt=71.32, overall=71.32 ]			(308.36414, 8518.16)(310.1012, 17436.77)(289.16165, 16483.115)(289.91916, 20918.242)(292.0913, 3883.0664)(307.22552, 5147.8867)(307.1005, 1637.49)(288.82193, 13836.83)(290.09174, 1618.031)(292.59915, 267.59998)(324.62653, 3805.7605)(324.1243, 210.08)(308.01157, 852.6023)(308.1217, 386.27)(309.1246, 95.88)(331.17752, 4029.589)(332.59186, 4711.795)(333.09207, 4866.9062)(311.78708, 4634.116)(312.072…	11.8376
CPDQT-427	2756924	1624561	1	2128666	1663129	1949529	82421536	66361928	62501540	717346	918187	1	803456	1111825	1730096	33185528	1	34646576	681498	1985436	1034642	2033182	2740043	1345226	55005324	13265416	1644159	87038000	2301813	1582506	1623812	63976240	CPDQT-427	CPDQT-427 [ C12 H14 N2 O2 S, tgt=64.50, overall=64.50 ]			(252.07327, 2633.3774)(232.73001, 3465.9353)(253.21158, 391.23376)(255.0896, 384.06)(235.85297, 392.24777)(236.07506, 762.6167)(237.0772, 1156.47)(270.49124, 8822.865)(271.6629, 3190.5464)(272.27747, 4733.6577)(273.11185, 701.824)(252.65034, 4076.4817)(253.10106, 2230.0144)(253.85074, 2838.1475)(255.1015, 231.6)(276.79172, 294950.12)(277.6865, 44002.4)(278.07278, 926.81)	6.64816
CPDQT-428	1920883	784319	3385316	745553	1452639	1436101	402888	587758	1	542222	1858899	1	1	1	771480	1098660	8660648	1	1574754	2792076	915372	789032	1382390	1115762	1017773	1293197	704748	882510	1247157	1	1022603	468941	CPDQT-428	CPDQT-428 [ C9 H9 N O, tgt=83.71, overall=83.71 ]			(149.84308, 48598.91)(151.00023, 7503.5625)(151.74797, 2120.5833)(132.0648, 7514.34)(148.8771, 23180.006)(152.9474, 3942.0642)(153.0905, 3247.19)(130.18126, 27785.168)(135.08014, 21315.441)(166.68259, 11369.968)(169.02277, 68215.4)(170.1174, 121596.01)(147.7345, 9874.895)(149.09555, 15716.051)(170.3082, 14010.112)(171.22803, 1294.8566)(156.40912, 5601.887)(157.06387, 7009.8525)	10.9096
CPDQT-422	111980	116216	1	108155	115832	104561	1	1	1	1	1	1	1	1	1	1	1	1	1	1	174419	198935	218457	221393	148409	154129	167074	164858	200287	263183	168671	215835	CPDQT-422	CPDQT-422 [ C12 H20 N O9 S2, tgt= ]			(369.05917, 1699.7161)(405.09924, 18608.79)(387.08896, 23282.076)(409.04214, 766.172)	16.4527
CPDQT-423	1507909	1	1067763	895993	1	1	1	1	1	1	1	1	1	1	1	1	1	1	1	1	2989987	3930329	1	1	1	1	4125369	1	3556035	1	1	1	CPDQT-423	CPDQT-423 [ C10H9NO2, tgt= ]			(179.57214, 7719.335)(180.0749, 1721.3)(160.05855, 4653.563)(162.0672, 1122.81)(176.07056, 95766.74)(177.07219, 7572.8193)(178.0755, 1226.03)(158.06041, 16583.402)(159.0631, 169.27)(160.0584, 551.9)(193.5997, 3102.4524)(177.09016, 7519.4487)(179.09875, 3027.8452)(180.1019, 4880.16)(198.0516, 2120.9648)(199.0506, 48.32)	21.4538
CPDQT-424	3690805	4943324	4604060	5173328	5336179	4133593	1	3233350	2875917	3168042	3075953	2043206	3418862	3361048	3555090	3402175	27885782	3610612	3996924	2438579	5559484	9177536	10103699	7979485	11113318	13509432	10828245	9045094	9041057	10033647	9074546	6056318	CPDQT-424	CPDQT-424 [ C17H14N2, tgt= ]			(246.11531, 104516.49)(247.1186, 16393.377)(248.12125, 1138.0426)(249.12697, 16200.2295)(251.99576, 5606.2803)(251.1338, 6384.07)(266.48187, 14945.227)(268.79584, 21673.953)(268.83276, 15783.731)(269.1675, 19105.92)(270.5247, 2486.0647)(271.44424, 956.0225)(272.3128, 1322.903)(273.1136, 110.71)	5.59122
CPDQT-429	759326	743400	621344	750341	640463	383079	876487	510345	703046	845446	952092	1	554900	1119673	764141	1	874546	744429	1019552	770102	818670	1114920	1929565	1420223	1292623	1835831	1561382	1682076	1693117	1177716	1557773	1595153	CPDQT-429	CPDQT-429 [ C10 H8 N2 S, tgt=40.44, overall=40.44 ]			(188.31369, 21843.014)(189.04314, 1672.0737)(190.0357, 698.14)(190.0513, 159.56)(209.07585, 3226.0562)(210.0773, 7652.48)(211.0754, 1585.54)	5.32997
PENTOSE-RING	2494747	3396734	3353129	4200445	3747681	3427981	1	1	1	315455	2146866	2507197	4693476	4738577	2932435	4224942	4743552	2850272	2718741	2456310	2265971	1	4543230	1924532	4265689	4091496	2315888	1590971	3608268	4833916	1996764	3475675	PENTOSE-RING	PENTOSE-RING [ C5H10O5, tgt= ]			(152.13452, 37407.15)(153.06052, 3391.9807)(154.0603, 209.88)(133.92029, 470.70374)(151.06102, 25502.035)(152.06236, 12335.503)(153.06134, 3842.7852)(134.05183, 3249.6443)(136.0559, 5933.5366)(171.429, 5611.4883)(172.25089, 7586.1035)(173.0959, 1084.66)(150.07545, 23953.662)(176.25087, 175.92)(159.8767, 485.91992)	2.39091
CPD-12236	17481156	19115132	19811980	17804532	16187875	16330523	15234140	14184970	18700540	1	6058272	18416366	18671140	19316990	18161608	13896450	22207096	21852586	22265924	17543800	20245504	19126436	17321412	21643944	20390408	22333622	21026832	9768442	23244818	13700089	16555144	11865485	CPD-12236	CPD-12236 [ C15 H23 N4 O3, tgt=85.32, overall=85.32 ]			(308.40027, 36802.46)(308.67975, 23268.42)(309.1876, 8113.94)(291.0348, 22359.56)(291.8243, 12162.47)(293.2654, 3985.5518)(294.1799, 6212.095)(309.2823, 2506.6116)(309.19556, 722.175)(290.21735, 16657.525)(329.01663, 16529.5)(329.55606, 41638.145)(309.00287, 6556.5386)(311.2073, 5214.83)(332.48068, 7982.4062)(335.17886, 1362.8834)(312.1562, 440569.3)(313.15927, 68489.82)	6.57778
CPD-4	1	1	241754	209456	1	1	1	1	181652	252344	403086	149735	216076	527072	290910	1	557763	308629	773093	231311	188817	167659	347941	320289	181614	413973	237343	1	197668	186835	1	1	CPD-4	CPD-4 [ C10 H11 N5 O6 P S2, tgt= ]			(395.9813, 1354.655)(397.9829, 3860.48)(377.97546, 495.41998)(378.9793, 222.635)(392.9978, 376.15247)(379.65054, 245.18333)(412.8023, 978.3689)(413.02594, 336.625)(393.56955, 1280.1005)(414.978, 8554.847)(415.97906, 450.46777)(416.97632, 1336.7001)(399.30386, 580.6223)(401.5681, 425.826)(401.96915, 334.85666)	1.35159
CPD-0	2201115	1943450	2293136	2055702	1782744	1645784	2083256	1869588	1611190	1	1	1975157	1590861	3071928	2005908	1825578	1562741	2007446	3737921	2296397	3065396	3722475	4180156	4309701	3748524	4119127	4996408	4505125	4197108	4528902	3988264	4483555	CPD-0	CPD-0 [ C10 H8 O4, tgt=85.96, overall=85.96 ]			(197.0561, 4226.01)(175.03548, 1634.7515)(196.0594, 164.025)(175.0374, 2186.1)(212.08217, 1352.0684)(192.06589, 68770.87)(193.0694, 7530.2065)(194.07872, 752.5693)(217.0346, 336.7817)	5.34659
CPD-7526	6140625	5305795	6365388	3907942	2601013	5171976	2066250	3476948	2542434	2586702	2510121	998179	1245753	884349	722173	2866350	1312257	1833971	3000813	1226491	837193	1378942	1752012	1236123	1	2111881	2825923	1845485	786942	1151277	421307	4026542	CPD-7526	CPD-7526 [ C40 H60, tgt=51.24, overall=51.24 ]			(542.61804, 1363.8127)(543.0763, 842.9979)(543.30444, 3855.7888)(544.1158, 5036.484)(544.4942, 1463.06)(560.7739, 5862.7124)(562.3749, 14965.514)(563.3146, 10913.763)(564.5305, 13138.76)(565.9506, 7648.9937)(566.80585, 3479.4749)	29.6684
CPD-8960	7239156	8224264	7878689	6122846	7409592	6690994	9151430	6461853	7728286	2301295	2041230	6355820	6035657	4319435	6370737	4240651	3517854	2794172	4464234	7718492	12115586	10324891	10470993	11316413	8768896	9356404	1	1	10302414	1	1	1	CPD-8960	CPD-8960 [ C22 H22 O8, tgt=93.72, overall=93.72 ]			(416.22498, 191132.86)(415.13705, 78505.48)(416.13858, 13494.533)(417.14523, 1237.0549)(398.7403, 2970.909)(399.66248, 3897.8572)(419.14932, 464.4)(399.13022, 3812.1697)(400.2778, 564.18713)(401.1438, 1112.85)(433.16806, 111512.6)(434.1718, 20979.082)(435.17456, 4811.5947)(437.176, 135.66)(415.20563, 223429.42)(416.16107, 46050.19)(440.33163, 14938.748)(441.13226, 5600.771)(419.61627, 3500.001)(4…	16.4689
CPD-8962	26461580	33683252	50132064	44419712	46662548	49003992	47576816	40795548	3849098	1510012	1814484	37715480	48256588	34372108	41559000	35583232	1	24314580	1252609	1991247	6122788	7266872	12145935	1961811	5166845	1874223	2403529	1818628	3837771	2122817	1646824	10402951	CPD-8962	CPD-8962 [ C23 H24 O9, tgt=81.42, overall=81.42 ]			(447.81522, 3557.0)(449.15366, 782.55)(429.0876, 3206.233)(430.14108, 788.3489)(430.148, 575.24)(432.1529, 170.06)(445.1496, 43415.79)(446.1541, 11178.21)(429.81247, 17694.133)(431.04965, 4483.677)(433.1612, 364.73)(465.18402, 2043.6931)(444.3224, 234611.56)(445.17087, 57628.465)(446.17355, 19087.605)(447.17966, 3551.38)(467.84256, 25329.113)(468.63968, 5466.577)(470.744, 2070.0798)(450.2007, 129…	11.5416
NARINGIN	1	9227453	11843770	10043856	13732656	12203627	13802797	11697137	17696640	4323224	5402605	8977775	12334032	7014330	12268466	10415705	5557289	6894387	7543162	11518648	2327338	3917728	3225740	526970	4558721	879012	3324484	2197660	922867	3894002	1	4146002	NARINGIN	NARINGIN [ C27 H32 O14, tgt=61.65, overall=61.65 ]			(581.24286, 129335.9)(582.31055, 95791.91)(583.27844, 33356.86)(584.19214, 11310.839)(585.1965, 2323.386)(563.6692, 901.1488)(581.3282, 90640.94)(582.3336, 27846.973)(583.5967, 4415.672)(584.1959, 405.555)(567.6618, 4904.2227)(567.7905, 2761.728)(569.1912, 6190.5)(600.1819, 2480.6892)(600.8165, 1643.9441)(601.224, 3912.2131)(602.2264, 9711.5)(603.2336, 3115.68)(580.96814, 6964.4043)(583.587, 2687…	14.9477
TRANS-CINNAMOYL-BETA-D-GLUCOSE	11689947	6925569	9629603	8211746	7268294	7760872	26181752	8963581	8163033	5072786	6052462	10860491	9855135	39116232	11988258	6157621	9321307	11635727	42949780	13671455	25908664	25952488	10323989	43201468	3728662	12636917	14828008	31210086	30102276	29509136	17982008	35072956	TRANS-CINNAMOYL-BETA-D-GLUCOSE	TRANS-CINNAMOYL-BETA-D-GLUCOSE [ C15 H18 O7, tgt=82.07, overall=82.07 ]			(313.84995, 1689.4368)(314.1141, 60.64)(295.33557, 3492.8186)(296.30478, 2432.5437)(296.10065, 806.835)(313.2742, 1692.2561)(314.11868, 5139.424)(295.7238, 2268.49)(297.94748, 2095.5798)(298.1173, 410.4)(330.421, 3239.7122)(331.43475, 573.3371)(312.05127, 7469.268)(313.1322, 65.59)(335.55527, 19947.705)(334.59198, 6469.9775)(316.1591, 456046.03)(316.81418, 58904.043)(317.4516, 8465.284)(318.09802…	13.8989
INDOLE-3-ACETALDOXIME	1548064	1443698	1029377	1129790	901033	1081169	1	2366021	1	1	1	483616	1	1	1	1	1	1	1472426	1	1	1	1	712672	1	1147487	1	1	555569	1	1	1	INDOLE-3-ACETALDOXIME	INDOLE-3-ACETALDOXIME [ C10H10N2O, tgt= ]			(174.4116, 14028.202)(156.06618, 5662.1523)(177.00682, 3691.515)(179.09871, 3662.673)(157.74606, 15350.532)(160.58759, 5743.6265)(194.11829, 27850.693)(195.12308, 28208.824)(197.128, 13668.44)(176.61029, 8259.198)(199.82463, 2316.979)(200.07716, 655.13995)(201.07864, 731.07996)(182.73586, 36928.953)	13.392
CPDQT-436	3989802	5366975	2414290	2625340	2214198	5042582	1124260	3649849	4631547	5274698	1	3030906	1905976	4000168	4076860	1873260	9314817	5244170	11933956	5513658	1	5439710	2904532	2208077	6679026	2528574	7059188	2472530	7311169	2493160	5218913	1	CPDQT-436	CPDQT-436 [ C10 H13 N2 O, tgt=79.46, overall=79.46 ]			(178.8031, 2391.7966)(179.27399, 403.6417)(160.0956, 32030.775)(160.42928, 15424.603)(181.36911, 5931.938)(160.0981, 28802.508)(161.0979, 11801.38)(196.8619, 15500.534)(199.1448, 32499.666)(180.42139, 7160.579)(202.24591, 13419.483)(204.43674, 1035.9321)(182.08176, 107995.06)(183.14822, 11375.053)	4.85174
CPDQT-434	1002451	532734	1221525	1243235	745703	751351	1014642	870984	1030158	1	501861	780276	9095551	915379	775190	9387798	3412520	1	1406216	1727631	924581	1432546	2617163	2243507	847116	2949167	1816425	1926784	1681291	2375912	2047967	2350843	CPDQT-434	CPDQT-434 [ C20 H24 N5 O6 S2, tgt=60.99, overall=60.99 ]			(494.1189, 9897.096)(495.12137, 1889.2134)(476.7352, 32421.826)(477.73834, 7273.749)(478.72156, 814.941)(479.1154, 2970.54)(515.6714, 1326.1892)(516.9508, 672.352)(494.13638, 71336.55)(495.13754, 24628.904)(496.14066, 3206.2869)(519.4754, 20872.627)(519.1119, 24422.54)(499.8576, 2174.806)(501.1015, 10110.072)	14.1259
CPDQT-435	360373	291122	466309	465615	397979	284091	393650	243816	582284	147599	257061	299502	363279	225937	262086	274750	681537	294598	191458	293423	1	141442	202334	120338	176809	427656	470876	1	173939	320140	136110	193391	CPDQT-435	CPDQT-435 [ C21 H26 N5 O7 S2, tgt=59.60, overall=59.60 ]			(525.31775, 2518.5938)(528.6312, 2890.4023)(530.1313, 1349.42)(529.4636, 3610.7131)(530.4644, 1697.9434)(531.1289, 1534.21)(509.1272, 2522.2437)(510.1311, 587.12)(544.1619, 613.15497)(546.1602, 1239.9733)(525.07495, 3292.2065)(526.4685, 3682.1794)(528.1451, 7655.5454)(531.0525, 3611.275)	17.2781
IODOACETAMIDE	1	1	1	102527	1	1	1	1	1	303236	176089	1	1	1	1	1	1	1	219442	1	1	1	1	1	1	1	1	1	1	1	1	1	IODOACETAMIDE	IODOACETAMIDE [ C2 H4 I N O, tgt= ]			(186.62677, 511.51)(190.91228, 13342.955)(191.91556, 274.66)	1.17776
CPDQT-432	514635	585139	1032474	885483	576318	577382	565426	494376	735469	1	1322037	563530	662155	1398081	868705	373459	1517631	973612	1953020	684647	566236	574442	973195	959708	607975	1129955	670269	452631	580729	652211	363583	387363	CPDQT-432	CPDQT-432 [ C11 H10 N2 O5 S2, tgt=77.26, overall=77.26 ]			(337.028, 1961.5182)(338.0051, 410.99)(298.99313, 2674.8486)(320.0049, 297.35)(332.40402, 451.6791)(337.0324, 1829.96)(323.01736, 16312.989)(323.9748, 360.19)(314.02664, 18878.242)(315.02597, 2447.9014)(316.02545, 1462.397)	1.35142
CPD-6061	2033976	1890844	2156969	2332074	2120050	2306762	2428256	2338374	1967496	1487455	1432476	2002311	2273144	1772312	2196399	1889834	2282537	1393988	1549989	2401449	2087472	2333368	2266912	2646276	2227655	2068354	2189010	2194630	2226673	2809245	2108872	3537778	CPD-6061	CPD-6061 [ C9 H10 F N2 O8 P, tgt=57.00, overall=57.00 ]			(345.06137, 1255.2672)(327.049, 249.31499)(331.0026, 26385.123)(332.00598, 2500.6367)(333.00024, 2620.0974)	20.9377
CPDQT-433	1220619	922227	584029	1483797	1218750	1636993	1100994	1124356	1613715	1110793	640747	247168	1	825641	174289	166546	398159	1372758	434545	2065623	183538	1834431	512948	1143573	1010674	1166761	757612	1	474110	2226477	382642	493471	CPDQT-433	CPDQT-433 [ C11 H10 N2 O S, tgt=50.03, overall=50.03 ]			(218.7654, 3708.859)(201.04398, 11517.589)(204.61458, 718.25714)(221.06105, 9400.837)(204.2155, 1632.9565)(205.58746, 1512.9009)(237.6119, 641.07)(240.0077, 606.1692)(240.58566, 277.025)(220.82722, 5533.7856)(223.0784, 61.22)(224.27817, 7052.545)(224.02827, 6025.737)	6.63659
CPD-12217	2459545	2556662	2487883	2254081	2150673	2452091	2542064	2676261	2051800	1638155	1	2250855	3741526	2018643	2654323	1610980	2725417	2973598	1585912	2570506	2971750	3708041	3428821	4106541	4956267	4682316	4122777	2947133	3488851	3971206	3801980	3771008	CPD-12217	CPD-12217 [ C15 H14 O2, tgt=81.99, overall=81.99 ]			(226.75598, 9880.563)(228.10185, 1336.875)(209.5949, 1469.63)(212.19139, 1040.4037)(229.21335, 45141.617)(228.11261, 21741.01)(209.45912, 2158.5024)(210.09473, 402.53)(244.13614, 14923.424)(226.79224, 141864.58)(227.12732, 28075.773)(252.6466, 6953.8335)(253.24174, 7262.5044)(231.9536, 5416.6753)	20.3263
CHLOROACETOL-PHOSPHATE	421730	1	256855	260921	271718	355324	1	356423	518694	1	1	1	227779	1	1	1	1	1	1084171	1	1	149740	1	1	1	1	1	372498	1	1	222021	1	CHLOROACETOL-PHOSPHATE	CHLOROACETOL-PHOSPHATE [ C3 H4 Cl O5 P, tgt=47.60, overall=47.60 ]			(210.98859, 626.11005)(212.9394, 1583.5449)	1.55447
CPD-12218	1256603	1	2669598	2022297	1	1	2289643	1485532	1	1110326	1767319	1	1355974	1	1273691	1	1	1	1	1	2228828	1	1	1	2140516	3576168	1	1	1646784	1	1216522	1	CPD-12218	CPD-12218 [ C9 H9 O3, tgt=87.22, overall=87.22 ]			(165.05452, 31209.48)(166.05827, 3127.9922)(147.04375, 37501.26)(148.04767, 2404.9287)(168.06793, 890.29004)(152.8657, 1222.3779)(185.59564, 8952.449)(167.08391, 5061.6997)(172.0396, 516.285)	15.6365
CPD-12223	1	1264525	1	2819287	1429732	886353	1	1	732149	1	1	1	957357	669070	777493	1	811099	860363	431879	2741889	2099368	947745	857918	788034	932836	1037901	694217	689121	603999	1021899	807127	766217	CPD-12223	CPD-12223 [ C12 H20, tgt=87.29, overall=87.29 ]			(182.19063, 20105.006)(183.19366, 2441.3499)	12.8405
CPD-14474	41723164	52611120	52493656	48720156	28980924	50564840	29723112	33335888	55153368	47953228	90190848	28601410	43062084	57554652	53366024	22606352	1	19202136	105508448	57503264	44164716	35839124	74676048	45897180	40761620	99384056	72520256	45696236	61162952	67694264	33411952	38766272	CPD-14474	CPD-14474 [ C9 H11 N O2, tgt=87.68, overall=87.68 ]			(169.0866, 770.13)(150.29695, 35215.305)(152.08136, 214.45999)(166.08641, 1319041.1)(167.08942, 133304.56)(168.09738, 12064.296)(148.17294, 3582.7832)(184.11368, 53116.863)(166.65417, 7345.3315)(170.1172, 61368.12)(188.06947, 12979.364)(189.07259, 1106.654)(170.12613, 2838.677)	4.79006
CPD-12225	1467011	2707444	1569273	1216680	3453590	2618144	1443193	6695989	6450429	1353203	3216574	830830	934854	2237215	1366548	1038923	38290360	1247975	1	1061578	1	2198970	4351557	6633188	4776012	1236061	5406862	2729865	2597302	4390261	1516932	2875967	CPD-12225	CPD-12225 [ C11 H18 O, tgt=62.81, overall=62.81 ]			(169.23468, 1934.4813)(153.14185, 2742.35)(167.97154, 5681.899)(168.14474, 2502.0676)(149.13249, 28249.658)(150.13234, 4432.248)(184.16966, 37815.117)(185.17308, 5444.7085)(166.1612, 489.35)(191.24161, 86683.39)(190.7951, 26413.781)(193.1345, 5138.0)(171.21562, 56855.465)(176.1321, 547787.2)	21.3667
DIAMINONONANOATE	3048616	4383235	3655902	3126058	3034559	3281344	3540921	3231094	4735967	540944	1524009	4225073	4887589	6291272	6262102	3328119	20846242	6951149	5355431	3585226	4119840	3947166	5809308	5343949	4162604	7332110	4611806	4578685	4447693	5496147	3796501	3410689	DIAMINONONANOATE	DIAMINONONANOATE [ C9 H21 N2 O2, tgt=97.90, overall=97.90 ]			(189.16014, 290757.78)(190.16216, 30479.947)(191.16313, 2793.345)(171.29971, 1007.296)(214.81204, 1240.891)(215.97107, 140928.42)(216.15932, 195792.27)(197.80302, 3064.6445)(198.14778, 4852.775)	1.23672
CPD-13346	573507	1095829	821267	642189	4228643	404103	1	599578	1	607364	2665923	530677	541445	519227	20683014	2143506	1384249	363451	733459	791607	1	1756618	832716	625541	1503038	1360262	573815	482371	536257	3931836	609877	1	CPD-13346	CPD-13346 [ C6H12O2, tgt= ]			(118.088036, 541513.0)(119.09092, 33243.4)(120.09215, 339.98)(102.18359, 6777.112)(103.087845, 999.995)(119.23251, 10536.714)(102.089775, 11361.138)(136.83897, 5425.676)(135.12094, 1055.515)(116.10715, 21941.348)(117.10549, 621.5957)(140.21999, 4768.7764)(121.657, 40636.996)(122.067245, 1733.6045)	11.7779
CPD-14478	9192378	16644715	24384394	11950275	13559308	15169496	17223804	14306181	17847944	6857426	7218652	16756488	14092719	8463608	10755340	11932983	9735021	8104457	10363966	15354202	19608132	4792883	13919455	16539002	12175504	12895076	12164663	4870813	7575096	11886860	9224300	12893516	CPD-14478	CPD-14478 [ C28 H40 O9, tgt=82.17, overall=82.17 ]			(520.99677, 21700.062)(521.56537, 5324.6934)(522.2732, 1997.2272)(502.47385, 2928.5938)(503.75317, 722.505)(523.709, 8722.872)(527.2849, 17776.81)(504.26575, 232792.23)(505.2685, 61318.875)(506.3083, 14713.0)(507.913, 796.11176)(508.2786, 306.96)(542.2693, 1147.0253)(543.5872, 483.07452)(543.31104, 646.675)(544.3221, 116.85)(523.95605, 1217.5087)(525.038, 2165.923)(526.1812, 1015.65247)(544.16907…	10.9544
CPD-14479	14949430	26478020	20552074	18419552	23165148	16581941	16676898	15821649	32536762	10456389	13192804	21653084	20712376	15149157	20497508	21095736	18486856	22397268	13671930	24935750	13666139	10972406	29416344	22129536	1	12616246	25304320	1	19765094	24913560	18124952	16316747	CPD-14479	CPD-14479 [ C28 H40 O10, tgt=64.46, overall=64.46 ]			(536.45026, 40779.117)(537.2674, 12262.932)(521.3162, 24777.64)(523.0144, 24039.822)(523.88837, 36065.43)(524.2649, 88188.37)(537.96265, 14467.031)(541.2866, 8989.23)(519.8638, 60832.5)(524.2688, 20380.475)(525.27167, 4103.1133)(555.3297, 6397.935)(556.91986, 8650.028)(557.8528, 33750.79)(558.56116, 87257.65)(560.3092, 50009.63)(539.35944, 13228.549)(540.56793, 6202.1597)(541.39197, 3756.0667)(55…	15.4172
CPD-12222	14421527	12242517	11228404	15993527	6651206	41192976	8479601	6992888	8049203	7305586	33264172	10009326	6032287	6604354	7247999	13038247	19368220	11134940	5663204	10468424	8290199	7685289	10485539	7747710	7651593	11760401	8940513	8361151	13601707	10272442	8509084	12572745	CPD-12222	CPD-12222 [ C10 H16, tgt=99.64, overall=99.64 ]			(137.13242, 388772.9)(138.13545, 41854.758)(139.13863, 2021.301)(154.15898, 36050.88)(155.16212, 3676.8218)	19.361
HIS	1395700	1	1203054	3389227	3357507	3654680	5164177	4427167	3156307	1283880	655358	775517	1	2951585	1529423	1	3599056	2472088	1027861	1388734	2009441	1819838	1658936	1418965	1	1574352	1344959	1	1	2774553	1820964	1	HIS	HIS [ C6 H9 N3 O2, tgt=84.00, overall=84.00 ]			(156.54361, 5369.229)(159.0755, 537.67505)(138.14458, 33314.613)(138.0609, 4698.2134)(156.7179, 14112.853)(157.07477, 3542.22)(139.26852, 4864.139)(141.0738, 156.45)(175.5085, 10516.309)(176.93517, 3713.5505)(177.11243, 3005.6934)(157.09749, 741932.3)(158.09995, 43780.117)(182.40138, 1462.46)(160.049, 1941.21)	6.90643
CPD-12208	385941	540344	719109	436886	616439	406571	1	366357	1	403376	268345	340433	556072	320284	1	473018	1	256338	307413	1	1	1	474265	606087	410007	361000	462216	385353	512909	587274	424255	452056	CPD-12208	CPD-12208 [ C11H9O4, tgt= ]			(205.04974, 20023.055)(206.09995, 2349.3386)(207.04578, 909.42004)(188.03986, 1609.4033)(208.06432, 2020.8732)(189.0495, 1656.72)(226.84464, 1613.6412)(228.0948, 437.86)(208.33086, 6416.7827)(210.08664, 1528.24)(231.05072, 9362.116)(213.03983, 2302.54)	16.9619
CPD-12207	29580036	25804672	32939392	30090560	25907704	27349364	28946760	27413394	26507164	12926025	19724652	27350156	33196632	20475580	21259680	23651262	30563140	34885688	18826776	39378048	51895208	54785384	18121974	3328656	57909996	13586142	4106645	3130100	18245192	57287348	12526490	61655376	CPD-12207	CPD-12207 [ C19 H16 O3, tgt=82.02, overall=82.02 ]			(293.2789, 12357.446)(294.20337, 2679.75)(295.7857, 527.9067)(276.20114, 3247.231)(277.07065, 10764.205)(278.3957, 3504.321)(279.11456, 1656.51)(293.11768, 17129.236)(294.12134, 3672.8801)(295.1162, 4218.86)(275.68085, 1415.0128)(313.46793, 8856.83)(315.15836, 6502.086)(295.06842, 3410.9607)(296.39795, 12938.215)(297.1471, 27039.46)(317.9395, 379542.25)(318.50726, 83707.984)(319.1086, 14738.485)(…	19.0397
FORMYL-COA	161787	138142	6963653	14852842	3445997	3731467	2333165	2436885	2091173	2922106	2232857	1855818	2266679	1692099	5911579	4669869	1908957	1636274	2118165	2413207	1927690	2295759	1	707595	659869	1	1993613	3155784	760985	1	1	2362131	FORMYL-COA	FORMYL-COA [ C22 H32 N7 O17 P3 S, tgt=32.75, overall=32.75 ]			(776.068, 109.08)(809.1214, 1755.01)(810.1233, 431.385)(795.1168, 1934.7549)(814.1092, 17654.994)(815.15045, 2993.2495)(816.0576, 770.24)(796.722, 3358.827)(798.05365, 364.95)(799.54144, 323.375)(802.0681, 214.41)	29.3805
CPD-12205	1936438	7122248	2303654	1142092	2397337	2061506	2982077	2848810	14632374	11463272	15466125	18071862	19792954	5600373	4065738	7942181	3824548	10383458	1637388	5649799	3987471	6805607	8320286	5010843	5328784	22457420	10913272	12700180	1	4876851	7069618	3900244	CPD-12205	CPD-12205 [ C19 H18 O2, tgt=95.25, overall=95.25 ]			(280.94543, 8962.412)(281.94357, 2697.7334)(281.89343, 3656.6475)(282.1454, 1550.87)(262.1264, 2539.9578)(263.12915, 20575.373)(279.37103, 1819.5261)(261.66248, 3985.6052)(296.88617, 8044.415)(298.83493, 10314.41)(278.15805, 49061.562)(301.11902, 353441.56)(302.1226, 62901.973)(303.1295, 9891.167)(283.10837, 32947.52)(284.10938, 6724.6323)(285.1224, 531.2575)	15.786
10-DEACETYL-2-DEBENZOYLBACCATIN-III	17281168	15677835	21210474	6025087	72158304	5794946	8698966	25010012	12034874	38500208	46191616	3574878	19862472	59582016	5454393	51288380	17360896	4516195	61022212	8378857	50956024	43568488	47715936	46972704	44911144	44615072	44384276	43308656	39315392	1	33946320	50311784	10-DEACETYL-2-DEBENZOYLBACCATIN-III	10-DEACETYL-2-DEBENZOYLBACCATIN-III [ C22 H32 O9, tgt=68.25, overall=68.25 ]			(441.45587, 17952.049)(441.9448, 3837.8928)(422.94818, 7865.509)(424.00018, 17008.723)(425.2016, 5688.639)(443.44852, 8448.103)(444.88968, 48142.324)(447.2276, 3221.3298)(424.38797, 8989.86)(426.4959, 5808.2856)(427.87985, 9802.733)(428.2131, 88018.69)(460.273, 141055.17)(461.54828, 38919.254)(462.5458, 11347.011)(463.25165, 5145.205)(442.23114, 19232.14)(443.33398, 7546.599)(444.12692, 10016.91)…	12.27
CPD-11945	1322892	1471758	2069433	1800877	1300698	1	2121370	1662538	1460706	2803779	920268	1140639	3829825	895195	1197286	1111673	25821828	1717882	1	2027995	5279168	10025987	7492630	8624429	6650511	4429573	5256915	6881095	9605608	6915185	6452427	8659687	CPD-11945	CPD-11945 [ C15 H11 O5, tgt=98.54, overall=98.54 ]			(271.06055, 207231.4)(272.06378, 34625.31)(273.06656, 4477.8115)(274.069, 680.40497)(293.1014, 419.94)(275.59274, 419.04498)(276.1002, 197.48)(297.0576, 1623.4957)(298.0588, 242.33)	18.3702
CPD-12209	1841174	11242586	72060672	6169668	18856756	1	4456451	1836081	34903176	2804411	13849355	33252224	11320787	23658256	9300093	6108363	59817316	12615106	29111686	100827744	1286816	1525388	69801944	84985424	44718272	1	1656125	3086559	2643928	1507739	6946727	127313552	CPD-12209	CPD-12209 [ C20 H14 O2, tgt=73.63, overall=73.63 ]			(289.6101, 2818.0999)(270.32562, 81555.37)(272.10074, 19136.523)(273.10623, 3970.3423)(291.06976, 2546.5195)(292.02817, 729.3655)(292.1189, 733.16)(270.99152, 16071.196)(272.4384, 1592.8104)(273.10788, 1409.3733)(274.1103, 75.18)(306.8565, 9955.576)(306.80673, 1083.639)(306.1332, 230.0)(286.54553, 1525106.9)(287.12427, 358769.47)(288.12625, 72870.734)(289.12622, 10814.768)(311.0938, 1668.0)(293.3…	16.8208
CPD-13357	2513172	1658791	2304729	1660676	1871872	1761157	1249401	867304	1664983	2608602	1686185	1657362	2526014	2511002	1951565	2020898	1	1	3016855	1	2328567	745180	858186	2139631	1347296	543244	1446994	914031	1209813	2498277	1476991	1765998	CPD-13357	CPD-13357 [ C5 H9 O4, tgt=86.38, overall=86.38 ]			(133.8096, 4620.6025)(134.54982, 905.59125)(115.17746, 9672.926)(116.035835, 137.74614)(136.06213, 597194.5)(137.06462, 38181.29)(138.06528, 621.22504)(120.0546, 175.77)(154.09189, 134.2575)(156.74248, 1706.822)(140.84328, 1410.0116)(141.03539, 1440.0967)	2.26887
CPD-14485	4980393	7652107	6572147	5919886	7235492	5621967	10303540	8953500	9448836	6144072	9168695	9752756	8794808	5373797	5943836	4659200	7937918	6587307	5957670	10065347	8214688	10073201	7006250	1	11269863	9290038	6204734	9743070	4193242	8512629	6714083	6802443	CPD-14485	CPD-14485 [ C30 H46 O3, tgt=97.23, overall=97.23 ]			(454.53696, 16424.66)(456.35147, 17957.26)(458.15414, 29779.031)(459.7614, 90838.68)(460.36465, 51622.73)(436.938, 11404.9)(438.33707, 6235.83)(439.3429, 23769.664)(441.3508, 36277.22)(442.34836, 11459.455)(455.96854, 130196.16)(456.97113, 43374.664)(457.8014, 10348.121)(437.3408, 51014.125)(438.34235, 16556.111)(439.34564, 8605.465)(440.3349, 2652.71)(474.58365, 6479.41)(455.1233, 5168.25)(480.6…	26.8811
CPD-12215	3604095	2340942	3416363	3474821	3879884	1347552	5466743	6705492	4428831	1930606	1632730	1158230	6383256	972507	5071622	2302042	3502506	5656843	3953951	3446546	1202828	6435236	3776149	2074799	3728628	1708127	2125421	958544	1	7675001	1364743	11470131	CPD-12215	CPD-12215 [ C11 H12 O3, tgt=98.72, overall=98.72 ]			(196.84091, 2437.4019)(177.3798, 25496.055)(179.0826, 2397.4868)(193.08635, 159103.22)(194.08958, 19069.344)(195.08723, 1860.1328)(175.07462, 66991.33)(210.94194, 9853.877)(211.10625, 610.81)(192.23184, 1990.7506)(197.1175, 25966.41)(217.94887, 20515.912)(220.07825, 24810.27)(200.0667, 7748.0327)	16.5621
CPD-13354	1602631	3107125	3360217	1929479	2163676	2407032	2970784	1711677	2157590	1016379	2823155	1460949	1990892	1727049	1707792	2081121	1	2211838	1519523	2733297	4601378	4037151	5145728	6477268	5556898	5098936	5614881	4598574	4753938	5227432	4214909	4737725	CPD-13354	CPD-13354 [ C14 H20 O7, tgt=94.82, overall=94.82 ]			(302.1272, 6506.83)(285.28348, 991.73004)(302.93555, 2556.795)(285.12238, 640.73)(320.82748, 16556.28)(319.1579, 6779.79)(300.24252, 156506.05)(301.24576, 24175.34)(302.15173, 3056.3433)(324.02863, 2863.1501)(326.11487, 2507.0867)(306.099, 182.69)	12.5376
CPD-14486	138837424	158334336	1	102633648	107836784	79366080	53330596	36462576	55846540	52824784	1	54624152	43719344	1	56979512	46856608	47851144	56661916	10964510	51568520	65037180	70503312	19341558	52256928	54025208	55869184	1	38616972	6813073	1	1	1	CPD-14486	CPD-14486 [ C30 H48 O3, tgt=91.43, overall=91.43 ]			(438.4892, 31506.889)(440.3577, 44531.17)(441.3638, 10046.56)(442.3658, 714.24)(482.6036, 19792.19)(483.8676, 28331.016)(484.68073, 13609.367)(485.36227, 21711.53)(439.4001, 257271.33)(440.403, 82164.016)(441.35986, 17621.797)(442.3707, 3483.1)(474.39407, 5479.875)(457.36655, 64872.844)(458.36682, 19537.453)(463.7346, 19151.363)(465.0759, 9529.258)(466.36017, 7846.668)(466.35858, 2707.3848)(459.7…	30.2302
CPD-13353	15343099	13901751	15703406	13002420	17953948	4117837	7725081	7695207	9075379	8687805	11649085	18141620	13087933	20116904	14262967	16899562	6763331	10923383	3268240	13502299	13520065	15051352	11669467	10917214	13365915	14057641	17239844	11516126	10435623	14569567	13610697	44739448	CPD-13353	CPD-13353 [ C6 H13 N2 O3, tgt=78.22, overall=78.22 ]			(162.09334, 5155.86)(165.10152, 867.8515)(143.08208, 10462.693)(144.08147, 122.21)(162.0993, 670.19)(163.0932, 51.27)(146.09355, 83420.22)(147.429, 4703.612)(148.09758, 5324.055)(179.33673, 2884.431)(163.62054, 13386.215)(188.09225, 13621.287)(189.09258, 462.24667)(166.36356, 63827.72)(167.07622, 6663.832)	4.105
CPD-12213	9165095	6567612	9964827	6608388	5764324	5090302	8004132	6020598	6087335	1	9080849	8399450	2848901	1838863	4826171	6259915	3307018	5937891	4022804	7623559	6322648	6217118	9698779	8036973	5854216	9995581	10491332	8530834	7443038	14305956	8018263	10161188	CPD-12213	CPD-12213 [ C34 H37 N3 O9, tgt=99.01, overall=99.01 ]			(635.5008, 3963.2854)(634.5979, 7963.9165)(634.76196, 3462.275)(637.2679, 91.71)(613.8701, 395.29504)(617.2621, 970.82)(634.2755, 3840.17)(615.40515, 684.0647)(616.2544, 684.435)(618.2661, 344.38998)(619.27, 96.74)(651.2891, 2415.4316)(650.2859, 511.55002)(631.2757, 71153.79)(632.27936, 27984.123)(633.283, 7030.3345)(634.29596, 1217.869)(658.2567, 660.22)(657.2514, 164.31)(638.2353, 782.38605)(63…	20.1953
CPD-14483	6446473	7785354	1	6348114	1	1	1	1	1	1	1646148	15831076	1	17263748	14252853	5764127	3157233	6277667	8949664	7021137	17741682	31695810	1	1	1	1	1	1	4286799	1	8847613	1	CPD-14483	CPD-14483 [ C30H45O4, tgt= ]			(472.02722, 22273.059)(473.64938, 11884.302)(475.14655, 24836.264)(451.3164, 5344.6206)(452.3252, 533.13)(471.34665, 73146.12)(472.34937, 24086.203)(473.34717, 21271.164)(474.3442, 14494.38)(475.3505, 4933.11)(455.94318, 56793.812)(456.34396, 30757.584)(457.01263, 11819.573)(457.5934, 6429.1143)(458.34525, 15661.75)(488.1188, 13530.897)(489.5092, 27172.38)(492.3754, 43659.4)(493.3809, 11578.5)(47…	27.7186
CPD-7545	2458966	1	2021988	1946145	1199630	1475893	3333929	2913564	2053416	1222754	1737840	675968	4256494	617854	2611875	728326	1	392787	1428611	3049342	525873	522014	1911615	862280	1655884	2583218	1	1	1581141	2400941	426687	4347325	CPD-7545	CPD-7545 [ C11 H15 N2 O3 S, tgt=87.29, overall=87.29 ]			(256.88202, 104380.44)(238.57205, 71973.695)(258.8394, 20764.164)(259.0916, 12697.18)(239.07715, 12141.694)(273.25546, 52723.664)(274.1886, 12537.264)(275.11215, 4274.1343)(255.1449, 22824.713)(256.10693, 4854.817)(257.10934, 759.6467)(279.07, 46987.48)(263.06195, 1993.45)	14.8044
CPD-4703	9323495	4587223	5003308	10782565	4335331	7585968	7753167	3260903	2506882	2209433	1832351	4836956	2451730	2613784	3547822	1097129	2934454	2062234	1026302	6466103	2250775	3506695	9031944	4864160	3767170	3092113	6429501	7232094	6024880	3056148	3117232	4047815	CPD-4703	CPD-4703 [ C15 H24, tgt=98.14, overall=98.14 ]			(205.19533, 186569.53)(206.19844, 32968.17)(207.20204, 2186.9683)(222.22198, 1378.9202)(227.17587, 17514.283)(228.1703, 4281.22)	26.6488
CPD-10201	17172018	2617996	19716060	10905546	3170242	9560775	19518096	17454384	10859982	1707085	2979062	7614223	3474547	4605704	9376544	5224019	15435023	4098304	5942586	21058998	5983457	5637802	7497280	8416649	3523623	1	6403222	10470499	6957765	15281183	9832240	3252655	CPD-10201	CPD-10201 [ C7 H10 O3, tgt=87.85, overall=87.85 ]			(143.06737, 8165.2944)(124.051796, 410327.3)(125.05551, 32879.04)(146.07924, 23052.424)(147.72821, 5068.142)(148.08113, 4194.598)(128.61673, 14734.336)(128.79626, 7975.7124)(160.0965, 9109.487)(142.08565, 9078.564)(165.62708, 1599.7366)(166.0644, 200.17)(147.2364, 21170.188)	14.8758
CPD-7547	6043033	5421782	5881320	7252027	5457897	7479425	9250067	8434909	7777228	1915899	2653094	3006604	3828616	5132531	2926388	4517554	1	1	4900411	1	1	904278	431220	721114	462276	167326	882430	999873	374273	743381	949164	1	CPD-7547	CPD-7547 [ C13 H15 N3 O3 S, tgt=65.99, overall=65.99 ]			(293.47406, 9922.894)(276.87936, 186770.16)(279.01962, 27473.348)(280.82373, 418.4)(299.0924, 844.4582)(300.099, 203.92)(277.51147, 2103.7656)(312.45, 6167.842)(313.996, 2012.8899)(315.1204, 2450.72)(294.0701, 4745.1494)(294.61313, 619.3566)(317.87698, 6501.6245)(320.4096, 23121.326)(322.0818, 6442.38)(301.56506, 9841.537)(299.0689, 429.07)	6.5
CPD-7546	263300	415558	270381	146915	339661	276551	163532	444534	641045	964739	5988481	810646	1176296	999249	2538759	338796	872532	404095	214725	2076518	1	1	1621632	429550	4067374	1001532	1990758	2550626	5181385	5471105	3068030	1	CPD-7546	CPD-7546 [ C8 H16 N2 O3 S2, tgt=44.62, overall=44.62 ]			(253.84668, 2676.1787)(257.0549, 224.53333)(234.17258, 564.8888)(258.26447, 1001.5153)(259.0648, 1470.0868)(236.18309, 3649.8035)(239.3254, 1735.391)(237.0547, 657.585)(272.72354, 5823.8545)(275.7581, 440.04333)(255.85759, 5105.2144)(258.0804, 435.5725)(275.34363, 6002.984)(276.64902, 4303.3403)(281.0472, 1812.49)(262.69955, 320.11832)	4.96274
CPD-8983	202166	237766	1	174457	1	190184	1	1	214834	1	247537	1	1	247731	1	1	931772	181912	286616	1	1	1	1	1	1	186480	190228	1	1	1	1	1	CPD-8983	CPD-8983 [ C6 H3 F N2 O4, tgt= ]			(189.01604, 591.07715)(189.017, 172.42)(206.44815, 3939.3027)(205.0461, 1654.66)(206.0419, 907.03)(187.19878, 6461.7383)(188.43729, 4752.3477)(195.9955, 1193.83)	2.95619
CPD-10206	3198065	25188978	1	3255613	7297261	31553388	6110961	29364242	4901149	1623241	103781280	3021926	4781986	2806163	2911833	4131444	1	127933456	1	2995630	5206594	3928848	4142169	4654571	4208540	3650558	3455748	3275887	2486033	3628474	1	3042499	CPD-10206	CPD-10206 [ C7 H8 O3, tgt=78.28, overall=78.28 ]			(140.85071, 472.063)(125.84593, 568.346)(143.63368, 21596.756)(145.06474, 1538.2977)(123.21878, 5129.0996)(124.04464, 296.70084)(158.07986, 4605.7344)(159.0808, 595.25)(140.07047, 6376.224)(141.56845, 332.57)(142.0668, 203.42)(163.70787, 68870.62)(164.0423, 15553.2)(145.09901, 1134.6365)	17.5799
CPD-8991	2732518	1218442	4493399	528055	915263	2041001	405613	994061	153095	9251593	1287730	1331472	346486	1625079	299466	688267	570957	466614	1310231	688049	2850500	777677	318370	472156	1	609796	793996	348228	625131	638717	490552	694085	CPD-8991	CPD-8991 [ C12 H10 O2, tgt=67.41, overall=67.41 ]			(187.57036, 38196.207)(189.74396, 3206.335)(169.43633, 11215.44)(169.31325, 3586.5925)(188.04553, 14759.926)(191.33643, 3293.0037)(171.94057, 3582.7485)(173.07747, 2273.198)(174.07759, 11651.41)(204.10266, 6442.6772)(205.1004, 442.55533)(206.09995, 307.54498)(186.82443, 5059.6357)(210.66164, 12640.503)(211.19038, 5156.82)(213.06995, 994.03503)(196.061, 46.96)	16.5216
CPD-10205	6094050	12675044	8890068	13735916	12650644	13739903	13327403	13398899	12572020	15093346	11976255	12016345	1	5739268	9201806	11692466	27183306	4154740	1	10478962	92198160	60951640	51715440	68796680	96658672	53208100	84383200	129860344	137145264	81986192	1	132509832	CPD-10205	CPD-10205 [ C6 H6 O3, tgt=77.31, overall=77.31 ]			(128.70975, 5507.4976)(128.04831, 391.38858)(109.02837, 2326.5747)(110.0385, 185.48)(144.06383, 20440.104)(145.06537, 1194.4028)(146.06036, 566.8936)(128.23293, 24756.83)(149.62509, 152737.3)(150.02652, 25113.387)(151.02864, 2082.6624)	21.8269
PHE	41723164	52611120	52493656	48720156	28980924	50564840	29723112	33335888	55153368	47953228	90190848	28601410	43062084	57554652	53366024	22606352	1	19202136	105508448	57503264	44164716	35839124	74676048	45897180	40761620	99384056	72520256	45696236	61162952	67694264	33411952	38766272	PHE	PHE [ C9 H11 N O2, tgt=87.68, overall=87.68 ]			(169.0866, 770.13)(150.29695, 35215.305)(152.08136, 214.45999)(166.08641, 1319041.1)(167.08942, 133304.56)(168.09738, 12064.296)(148.17294, 3582.7832)(184.11368, 53116.863)(166.65417, 7345.3315)(170.1172, 61368.12)(188.06947, 12979.364)(189.07259, 1106.654)(170.12613, 2838.677)	4.79006
CPD-10204	1307638	745534	1229700	2293706	1453403	784734	1983560	1160407	1564672	1	515940	608356	4504961	1196482	1	3933777	9411743	1	2297009	1	1	2339498	2697531	411629	1573785	4157865	1781597	498021	1	1	1180730	2524002	CPD-10204	CPD-10204 [ C5 H6 O3, tgt=54.33, overall=54.33 ]			(116.0352, 1818.95)(117.18066, 4130.1206)(119.801895, 1294.4425)(134.52127, 46429.402)(135.87508, 7530.7383)(134.0674, 341.48)(114.05493, 10789.369)(141.03136, 12940.704)	18.1496
CPD-10209	18020090	49086688	21883732	20461072	1	23119456	7099534	9903178	14997954	15994857	31665056	77411072	38034068	129700336	38306968	55481680	19758220	58260960	20288172	33476892	24760520	16476735	25205576	15067944	25111326	25793880	24521836	25685208	13445878	32219160	1	15262646	CPD-10209	CPD-10209 [ C9 H14 O3, tgt=86.43, overall=86.43 ]			(172.16377, 16512.418)(155.86043, 862814.25)(157.09763, 1690930.1)(173.20866, 5645.304)(174.11205, 9031.815)(154.34491, 75323.83)(156.1011, 76314.55)(188.12845, 909661.2)(189.13086, 101823.46)(190.12549, 41378.86)(170.11734, 184463.2)(194.8981, 2242.8289)(194.09578, 201.31334)(175.0745, 49876.12)	26.368
CPDQT-458	30126128	29999676	27142612	27396426	1	25061244	21265282	23990302	26130580	10161446	12015724	1	1	1	1	1	1	1	1	1	27485392	27959724	35045192	30062656	1	1	28452612	1	26504040	33024936	1	1	CPDQT-458	CPDQT-458 [ C18 H30 O4, tgt=97.03, overall=97.03 ]			(310.88272, 15372.187)(297.21896, 4506.272)(311.222, 13595.01)(293.21167, 825263.44)(294.21497, 153505.34)(295.21927, 28355.268)(332.25912, 881.1)(310.571, 4544.0166)(336.2173, 6200.12)(318.969, 1190658.9)(320.08917, 287992.44)(320.2072, 145435.06)	18.0527
CPDQT-459	29852612	2256701	1	150101	331930	1965530	536080	398430	1	139555	167789	123334	1	1	128712	155382	1	1	183271	142693	2637867	508931	2122172	1286975	1166953	2801019	2662198	1	2184603	1	443464	1034642	CPDQT-459	CPDQT-459 [ C53 H84 O2, tgt=45.67, overall=45.67 ]			(753.7895, 931.5829)(757.6586, 784.2)(736.14355, 881.8225)(739.6483, 944.56494)(756.91675, 98476.18)(756.6722, 388268.16)(739.57764, 1052.1658)(739.6625, 1380.2761)(741.16284, 1133.02)(770.9383, 954.00336)(771.8898, 744.61)(773.194, 243.185)(774.6954, 420.75)(757.68024, 432308.12)(777.85455, 4990.7744)(779.3551, 1280.1456)(779.64124, 445.89502)(760.77734, 5882.6416)(761.6302, 156.01)	21.3798
CPD-10207	21820120	2882732	27555560	13604214	3783096	11519453	27230816	21500786	14272441	2101116	1	1	1	1	1	1	1	1	1	1	1734558	1	1	1	1	1	1	1	7401738	1	12663307	40023144	CPD-10207	CPD-10207 [ C8 H10 O3, tgt=87.65, overall=87.65 ]			(155.2084, 2268.723)(158.29459, 2698.4968)(159.08, 1286.09)(137.05956, 780267.5)(138.06396, 67241.055)(139.0676, 5913.3867)(172.09671, 16326.3955)(173.101, 1246.8529)(174.0911, 1400.964)(154.0864, 8018.386)(155.08267, 983.318)(178.34303, 16232.718)(179.18617, 3107.1565)(161.81871, 3109.7205)	16.594
SARCOSINE	3996226	1	5464397	4957502	1	1	1358941	1	1	2326557	1	1	1	1	4328626	1	1244166	1	1	5124131	1	4999329	6243088	6184655	1216559	5296101	4769411	4624660	5158422	729394	697336	1	SARCOSINE	SARCOSINE [ C3 H7 N O2, tgt=47.07, overall=47.07 ]			(110.42283, 23498.277)(111.091225, 24067.508)(113.03985, 825.0543)	13.5641
2-AMINOACRYLATE	17756760	2923865	21766336	11819812	3895399	10272520	22519528	19056208	12375494	1	3495369	8707139	4215804	5259245	12099145	6852175	17495016	5575979	7510191	24082682	6527889	5822158	1	9714538	3919587	1	7945491	11967993	8406313	18699192	12107942	1	2-AMINOACRYLATE	2-AMINOACRYLATE [ C3 H5 N O2, tgt=86.19, overall=86.19 ]			(106.06722, 370393.44)(107.070244, 17580.742)(109.07506, 1327.0691)	14.6661
CPD-13369	1	7231217	3906663	1687624	2931171	4798678	2253400	2641383	1557157	3183206	2374786	897022	1842763	2810133	1164172	1465329	2757583	1	2393137	2094549	8090929	10521046	8325269	6659088	10631578	7004772	11341419	5741637	5335649	9694542	23730732	26496338	CPD-13369	CPD-13369 [ C18 H26 O, tgt=82.92, overall=82.92 ]			(260.20135, 56962.695)(259.20615, 225979.27)(260.20374, 159710.61)(241.69739, 53611.04)(242.19788, 14236.809)(280.41025, 846.395)(261.09726, 44129.547)(263.24088, 10345.357)(282.32352, 22304.957)(282.7366, 11484.249)(264.18088, 73629.2)(265.18488, 24074.434)(267.1942, 401.83)	22.6629
CPD-12201	605176	1	1968842	639277	1	1	1184804	1291199	1	1	1	1	1	1	1	1	1633928	297614	697495	3336096	1426295	1793059	1731250	2205555	971510	3287604	3714977	1	1288172	1	1	3859852	CPD-12201	CPD-12201 [ C19 H11 O2, tgt=94.28, overall=94.28 ]			(272.07654, 41930.41)(273.0806, 4609.62)(274.0879, 560.62)(275.0866, 114.7)(256.18542, 5476.418)(258.08057, 367.245)(274.0896, 315.99)(257.0815, 383396.1)(258.0849, 61569.01)(259.0915, 12310.406)(291.39655, 2178.2922)(292.78528, 2582.9038)(293.6776, 2583.5264)(294.12473, 514.055)(271.544, 93844.39)(272.54675, 15282.274)(273.1061, 2075.43)	22.7044
CPD-14498	6388144	12617747	23159972	5322108	6529615	7676396	2268193	3142418	13890667	689247	1	16287289	6504788	1	3057821	8529854	1	15873023	986566	4214007	6964925	9583098	6529666	6734747	8841679	3599294	7239237	10348027	4579310	12538424	3116484	140749	CPD-14498	CPD-14498 [ C30 H48 O2, tgt=62.37, overall=62.37 ]			(441.152, 26716.27)(442.12155, 7268.2295)(442.3652, 3090.88)(422.625, 7836.2104)(424.5639, 39568.082)(427.11957, 16855.064)(426.3628, 7470.78)(443.00717, 3325.7744)(443.12985, 1310.8425)(423.64203, 37390.64)(424.66974, 13300.477)(426.37228, 6191.9595)(460.62476, 2820.885)(460.7333, 189.85002)(442.24838, 1116.5743)(466.0829, 8155.5537)(466.9767, 4502.1997)(467.62003, 8897.315)(448.3135, 21035.18)(…	28.4952
CPD-12202	46001824	18215332	8967688	3088164	2611630	3800444	6309349	6659079	4769985	5404401	1985353	4897122	4244279	3193898	5049683	2070910	8564763	75162880	4055040	16483151	8782181	9834140	10581799	13261400	7375260	1	5121374	10831075	8952504	12060059	5787691	20240448	CPD-12202	CPD-12202 [ C19 H18 O3, tgt=83.48, overall=83.48 ]			(294.1783, 1068.8405)(280.16534, 4774.3794)(281.12894, 5151.704)(295.1336, 356280.4)(296.1369, 75245.984)(297.14224, 13309.554)(278.6263, 3464.4697)(281.131, 4101.12)(314.66693, 135990.33)(313.16034, 44707.043)(297.19073, 17183.285)(299.16547, 25517.01)(319.4292, 649.4)(318.1187, 205.88)	22.801
CPD-12203	1183650	1093785	996295	957328	1987600	1	2275638	705374	1643498	1529062	1187874	1	885919	1	973696	2459938	1296701	1	1	1	1	1	813624	1	440874	476793	320074	1	380883	681618	798352	1856935	CPD-12203	CPD-12203 [ C19 H12 O3, tgt=81.73, overall=81.73 ]			(291.0829, 3100.86)(273.07632, 41113.926)(274.07956, 6885.5254)(275.08408, 1058.5372)(289.08798, 10195.009)(290.0907, 782.59753)(275.0912, 1642.55)(308.454, 521.0133)(311.1297, 6173.29)(292.1158, 236.09)(313.57263, 1320.7225)(315.0751, 1170.57)(295.1859, 1976.8751)(296.06442, 462.36337)	10.9215
CPD-14496	138837424	158334336	1	102633648	107836784	79366080	53330596	36462576	55846540	52824784	1	54624152	43719344	1	56979512	46856608	47851144	56661916	10964510	51568520	65037180	70503312	19341558	52256928	54025208	55869184	1	38616972	6813073	1	1	1	CPD-14496	CPD-14496 [ C30 H48 O3, tgt=91.43, overall=91.43 ]			(438.4892, 31506.889)(440.3577, 44531.17)(441.3638, 10046.56)(442.3658, 714.24)(482.6036, 19792.19)(483.8676, 28331.016)(484.68073, 13609.367)(485.36227, 21711.53)(439.4001, 257271.33)(440.403, 82164.016)(441.35986, 17621.797)(442.3707, 3483.1)(474.39407, 5479.875)(457.36655, 64872.844)(458.36682, 19537.453)(463.7346, 19151.363)(465.0759, 9529.258)(466.36017, 7846.668)(466.35858, 2707.3848)(459.7…	30.2302
CPD-12204	29580036	25804672	32939392	30090560	25907704	27349364	28946760	27413394	26507164	12926025	19724652	27350156	33196632	20475580	21259680	23651262	30563140	34885688	18826776	39378048	51895208	54785384	1	1	57909996	1	1	1	18245192	1	12526490	1	CPD-12204	CPD-12204 [ C19 H16 O3, tgt=82.02, overall=82.02 ]			(293.11176, 12209.537)(294.11615, 2628.2395)(295.1174, 350.34003)(276.22772, 3076.2588)(277.1499, 11756.119)(278.5647, 2806.7888)(279.11456, 1656.51)(293.11722, 10896.992)(294.1213, 2324.4167)(275.85983, 1782.155)(313.31534, 9723.432)(315.15842, 4492.3667)(295.14337, 3020.0803)(296.148, 14905.57)(317.10275, 525034.06)(318.10583, 95750.234)(319.1087, 13660.805)(320.1136, 1653.02)(300.4321, 293.446…	19.7061
CPD-8999	6157925	7497985	8070962	6104418	6184424	5984328	5254394	4465999	7525796	5980746	5214111	5463123	6425564	9126411	5065402	4888485	4496264	6815707	10612432	4893730	4621450	3639475	7236851	4677206	4613049	7971142	6271857	5657056	5661787	4631331	4639382	3130873	CPD-8999	CPD-8999 [ C6 H9 O6 P S, tgt=69.06, overall=69.06 ]			(243.98935, 2145.945)(223.97295, 13805.109)(226.53148, 922.03937)(242.99046, 7428.9136)(244.0705, 269.35004)(226.98515, 295.79572)(260.21844, 1918.806)(260.016, 115.87)(242.00612, 9437.367)(245.009, 8566.8)(264.30624, 573.9133)	1.31244
CPD-14495	6388144	1	23159972	5322108	6529615	7676396	2268193	1	1	1	1	16287289	6504788	1	1	1	1	15873023	1	1	6964925	9583098	1	6734747	8841679	1	1	1	4579310	12538424	1	140749	CPD-14495	CPD-14495 [ C30 H48 O2, tgt=62.37, overall=62.37 ]			(441.5122, 10052.013)(442.3754, 1469.8768)(422.77042, 9422.394)(424.61404, 22787.943)(427.70352, 13163.523)(443.25757, 4466.61)(443.38025, 2090.3)(423.66977, 37236.613)(424.6984, 13013.044)(426.37027, 6693.9653)(460.74374, 3346.947)(461.4137, 101.41)(441.6386, 1208.865)(465.86282, 8171.6616)(467.03238, 4938.609)(467.8707, 6913.718)(448.09998, 22553.602)(449.7706, 70743.79)(450.55753, 101766.45)(4…	28.4501
CPD-8997	11264122	8202589	10726762	18181728	13234646	7431180	8104323	7587213	7546815	3605558	7798748	19267312	17055840	5310939	7086154	7040425	18979906	5841882	6103678	9964076	10857539	7232031	10405475	10152135	10921085	8138430	8889298	7252176	9657365	13674288	9265710	9449706	CPD-8997	CPD-8997 [ C10 H18 O, tgt=99.65, overall=99.65 ]			(159.15518, 1140.332)(137.13243, 406608.53)(138.13539, 42513.69)(139.1386, 2157.624)(154.159, 37878.227)(155.16212, 3875.4932)	19.3671
CPD-14492	6388144	1	23159972	5322108	6529615	7676396	2268193	1	1	1	1	16287289	6504788	1	1	1	1	15873023	1	1	6964925	9583098	1	6734747	8841679	1	1	1	4579310	12538424	1	140749	CPD-14492	CPD-14492 [ C30 H48 O2, tgt=62.37, overall=62.37 ]			(441.5122, 10052.013)(442.3754, 1469.8768)(422.77042, 9422.394)(424.61404, 22787.943)(427.70352, 13163.523)(443.25757, 4466.61)(443.38025, 2090.3)(423.66977, 37236.613)(424.6984, 13013.044)(426.37027, 6693.9653)(460.74374, 3346.947)(461.4137, 101.41)(441.6386, 1208.865)(465.86282, 8171.6616)(467.03238, 4938.609)(467.8707, 6913.718)(448.09998, 22553.602)(449.7706, 70743.79)(450.55753, 101766.45)(4…	28.4501
CPD-8996	11264122	8202589	10726762	18181728	13234646	7431180	8104323	7587213	7546815	3605558	7798748	19267312	17055840	5310939	7086154	7040425	18979906	5841882	6103678	9964076	10857539	7232031	10405475	10152135	10921085	8138430	8889298	7252176	9657365	13674288	9265710	9449706	CPD-8996	CPD-8996 [ C10 H18 O, tgt=99.65, overall=99.65 ]			(159.15518, 1140.332)(137.13243, 406608.53)(138.13539, 42513.69)(139.1386, 2157.624)(154.159, 37878.227)(155.16212, 3875.4932)	19.3671
CPD-7535	6140625	5305795	6365388	3907942	2601013	5171976	2066250	3476948	2542434	2586702	2510121	1	1	1	722173	1	1	1	1	1	837193	1378942	1	1236123	1	1	1	1	786942	1	1	4026542	CPD-7535	CPD-7535 [ C40 H60, tgt=51.24, overall=51.24 ]			(542.92236, 826.6411)(543.4777, 402.49667)(543.28467, 3112.689)(544.23926, 2796.48)(544.4942, 1463.06)(560.82654, 4313.3057)(562.91895, 23220.379)(564.5185, 20845.33)(565.5362, 8068.0127)(566.4713, 3626.4458)	28.9291
CPDQT-463	280260	532457	262597	262207	331827	237847	1	1	346911	332832	479619	394402	476148	439391	307831	441371	1	454818	304310	236902	483985	353121	394431	273375	326373	653771	475977	417171	293719	368036	517954	273653	CPDQT-463	CPDQT-463 [ C16 H19 N2 O10 S2, tgt= ]			(465.04062, 9108.831)(466.0489, 4932.6323)(467.04282, 1421.7795)(468.04965, 681.7037)(445.03174, 2324.1526)(446.03445, 186.95667)(447.0317, 273.98)(466.0559, 10634.65)(467.0542, 813.51)(468.0528, 1083.6)(463.57416, 715.245)(465.0727, 1368.95)(487.0326, 298.51056)(471.0224, 216.16)	1.43253
CPDQT-461	1073936	1	121076	637606	1163327	1121129	1020434	994701	1	1877763	1761339	849631	1572171	1156666	1119442	1	1	959982	882498	183688	1075616	763194	699231	152837	652004	1360493	716635	115822	734023	133270	859582	259511	CPDQT-461	CPDQT-461 [ C12 H8 O4, tgt=50.35, overall=50.35 ]			(202.04042, 888.19)(221.63162, 13732.939)(221.0597, 39928.64)(200.58095, 3859.102)(200.04396, 584.8233)(235.18842, 1879.0087)(236.08275, 1227.9225)(217.02806, 8581.491)(217.44484, 471.8175)(240.538, 539.395)(222.98015, 10746.583)(224.02792, 9493.137)	5.65478
CPD-8290	7372749	1	1	19156300	10933721	12548662	1343895	6225562	7775156	88020928	3730835	1	157576320	108460688	92704984	68673248	14860171	151281712	47467936	97483520	65252492	69696616	316337568	15231153	81135680	246421968	1	113062912	27044808	2012835	3977516	54895728	CPD-8290	CPD-8290 [ C41 H78 N O8 P, tgt=95.70, overall=95.70 ]			(743.5801, 40100.074)(745.5555, 71.85)(730.542, 73.82)(744.80426, 72487.41)(745.8086, 32444.156)(746.8096, 9122.892)(747.56665, 1502.4149)(730.93445, 70453.52)(729.55347, 12920.702)(730.5629, 8551.85)(732.5537, 14690.38)(761.6246, 329671.2)(762.6346, 101504.67)(763.5941, 25199.47)(764.59674, 4323.5186)(747.0082, 26828.438)(747.79596, 17296.506)(748.08276, 4460.015)(747.5781, 1843.54)(766.5337, 61…	27.622
CPD-7561	5308788	3250337	14981942	5089203	3636828	5712880	8972402	9648818	6581955	1	5158352	5939541	2274358	4282690	6564502	2532707	1	2413759	5354346	21650102	10630796	12854163	12689005	16482465	3790073	2978122	5831965	13485932	10850977	16382524	7099944	28814796	CPD-7561	CPD-7561 [ C15 H22 O5, tgt=73.65, overall=73.65 ]			(283.65094, 23838.793)(284.15646, 2677.28)(268.24503, 2254.005)(283.35553, 80310.58)(284.15897, 19334.414)(285.15265, 1784.0901)(270.159, 14388.52)(304.91818, 247497.36)(305.1897, 268197.06)(284.1786, 33898.152)(308.989, 16508.338)(310.15305, 3507.8062)(287.12402, 486587.2)(288.16797, 64017.51)(289.128, 11331.59)(290.1322, 692.32)	23.872
CPD-7560	1	753403	550517	1030308	2691453	10965301	1453833	1466251	1080684	6732109	1940568	1064043	4138573	792161	781513	1	1	3446466	4471840	5579627	3082249	1	3719872	1	6873576	6909151	1314003	6305837	6754266	1	6313517	1774278	CPD-7560	CPD-7560 [ C15 H23 O4, tgt=48.45, overall=48.45 ]			(269.68964, 133319.19)(271.17145, 42592.066)(253.15785, 15796.417)(268.16873, 19753.709)(251.92256, 17656.686)(252.52861, 3895.3289)(253.49713, 1160.7184)(255.1694, 289.57)(285.1956, 20366.97)(270.76947, 154307.52)(272.19763, 130898.47)(292.77475, 37633.28)(294.06888, 11334.758)(273.2213, 14112.339)(274.14474, 2252.0354)	16.9021
CPD-10214	17172018	2617996	19716060	10905546	3170242	9560775	19518096	17454384	10859982	1707085	2979062	7614223	3474547	4605704	9376544	5224019	15435023	4098304	5942586	21058998	5983457	5637802	7497280	8416649	3523623	1	6403222	10470499	6957765	15281183	9832240	1	CPD-10214	CPD-10214 [ C7 H10 O3, tgt=87.85, overall=87.85 ]			(143.06737, 7974.387)(124.051796, 410327.3)(125.05551, 32879.04)(146.07925, 22770.81)(147.76859, 5103.5566)(148.0812, 4855.006)(128.73528, 9811.798)(129.06955, 7501.5415)(160.0965, 9221.947)(142.08566, 9178.573)(165.62708, 1599.7366)(166.0644, 200.17)(147.2364, 21170.188)	14.6695
CPD-10216	9396080	1	10407500	10888464	10021731	12745188	12403027	12117739	10658097	1	3238615	11939927	14743036	11239470	14100489	9268003	1	6152074	7107195	13721076	9458139	5411461	7181414	7542513	7093202	6221091	7347281	5401332	5691795	8721731	6957704	9937476	CPD-10216	CPD-10216 [ C12 H18 O8, tgt=94.38, overall=94.38 ]			(290.9382, 109442.52)(293.31024, 4704.3623)(294.1124, 1945.525)(273.0959, 11515.04)(291.10657, 93758.13)(292.11044, 10067.952)(293.11002, 1480.3225)(273.0974, 10739.173)(274.09973, 2070.5051)(275.09296, 318.03333)(311.60776, 27691.951)(311.4742, 17558.783)(312.1429, 43236.83)(293.88327, 1207.1926)(295.1386, 119.32)(315.4055, 4031.966)(317.23477, 5344.446)(318.10226, 2110.952)(299.09262, 611.22626)	2.77588
CPD-6862	194779	422147	1	158514	1	201550	210901	148104	325812	196140	1	514216	142373	273851	225532	160981	1765735	237974	1	1	209619	230263	122556	233665	142885	1	330154	296496	152013	1	283913	238145	CPD-6862	CPD-6862 [ C6 H5 O3, tgt=47.16, overall=47.16 ]			(129.63484, 13045.19)(130.03625, 7658.405)(111.02213, 6617.1694)(113.03444, 10524.7295)(145.0639, 2692.58)(129.0554, 117.63)	2.443
CPD-4721	27553732	30935020	32012744	20316150	29639878	29075068	33567352	31093106	47102512	7855422	11601409	25277712	32592620	39847328	36743900	37124104	30483468	36981240	45945760	18372252	20793116	21603480	30447282	24997620	1	12609677	29362576	29863664	30780368	29385356	16639711	21209432	CPD-4721	CPD-4721 [ C15 H22 O, tgt=86.02, overall=86.02 ]			(201.16055, 18189.03)(241.15608, 294878.0)(242.15889, 43818.61)(243.1525, 176.88)(201.16109, 15168.51)(219.1712, 56754.176)(226.65535, 4493.2305)(227.88995, 5072.394)(228.16347, 3027.5)(223.20665, 2485.8462)	2.65325
THIAMINE	2028391	3025907	2307968	4058789	4104305	1677877	2238332	2722032	3147965	6477353	1533967	3099693	2872713	3315931	3453209	2936244	4688989	1	2230148	1	1	3309933	4142227	4128640	5741365	3555221	3825080	1	6160523	5737955	1	6585065	THIAMINE	THIAMINE [ C12 H17 N4 O S, tgt=55.20, overall=55.20 ]			(265.26074, 30442.654)(266.12042, 8085.953)(267.116, 2582.0303)(247.09944, 10178.9795)(248.10422, 1062.7031)(249.1136, 140.02333)(269.11908, 1017.33496)(249.0642, 2584.0454)(250.35936, 4051.5251)(252.11035, 1799.09)(285.78986, 13495.352)(286.14694, 29687.744)(268.00186, 6455.2524)(268.63245, 3446.535)(288.62357, 1964.4973)(289.09656, 245.26)(271.63095, 2406.6553)(275.0929, 360.65)	3.61703
CPD-19816	12525507	13942245	15448279	14323548	8232424	539683	8917742	1722864	10581542	1248279	576506	12044907	11108793	1700998	844274	756374	8861700	14777525	1117497	14941991	15311588	18937814	33566296	29027220	14680708	38441548	36549152	24893276	22567528	28257564	1	30624022	CPD-19816	CPD-19816 [ C12 H16 O7 S, tgt=71.45, overall=71.45 ]			(305.0648, 4591.896)(307.06454, 668.08496)(288.38577, 2713.91)(307.0705, 5914.47)(310.0771, 1651.23)(311.0738, 716.79)(287.19913, 708463.7)(288.0588, 127959.96)(289.06168, 18926.508)(290.06592, 1539.4767)(322.8055, 23857.01)(323.67487, 5936.176)(307.89047, 1315.8401)(332.29648, 14358.498)(333.06113, 14586.768)	14.4313
CPD-19811	4016297	4206177	1131614	4400870	1103006	5748832	1744710	5098083	1820953	962605	1788857	5008087	1474828	1072957	5967382	4841196	1	1	4432256	1409913	2324058	764691	1760418	2038737	5002133	4015224	1483694	1317984	881356	2608361	1272851	1	CPD-19811	CPD-19811 [ C18 H26 N O5, tgt=82.98, overall=82.98 ]			(337.45807, 15559.347)(339.19373, 3861.0898)(322.80652, 3217.3113)(322.6853, 7003.545)(323.1843, 61.9)(338.46283, 14749.923)(340.03644, 5151.7534)(340.19476, 3296.0962)(322.02002, 8635.878)(322.88828, 4860.669)(323.96936, 4778.207)(324.1906, 5238.54)(354.37296, 14542.317)(355.2152, 10194.426)(356.23035, 1137.41)(336.9308, 8399.327)(360.4537, 13772.964)(361.444, 2764.7046)(341.41385, 115009.21)(34…	8.9605
CPD-19812	3371916	1	2593675	2023612	2177212	1106763	2599021	1633108	1487598	8019451	5234047	18220328	18419632	15289593	4354603	2865222	1	2963955	1	1	1527706	1866332	2334651	1611075	7214506	1	58113216	1837472	1444817	1776816	1757428	1	CPD-19812	CPD-19812 [ C18 H25 N O6, tgt=80.04, overall=80.04 ]			(352.3191, 77765.31)(354.67612, 32738.816)(355.6792, 29138.717)(355.97852, 23710.105)(356.1856, 8955.68)(333.77963, 137345.62)(334.492, 35117.965)(336.66602, 3401.855)(337.1672, 2150.7)(355.77048, 25340.982)(353.9319, 15783.694)(357.1836, 7221.37)(334.64276, 20781.707)(335.43198, 5277.5015)(338.84662, 3284.4568)(339.1758, 2346.57)(370.50455, 23058.062)(372.20804, 26018.05)(373.545, 7772.5396)(374…	11.95
3-B-D-GALACTOSYL-SN-GLYCEROL	802372	702902	665974	619446	298714	1170484	1037288	938368	1374415	241840	550860	811138	729640	1226063	511923	442259	1	527972	1286736	321034	191565	229142	784304	3447963	251386	1687716	1380729	2907832	1	373604	380492	1	3-B-D-GALACTOSYL-SN-GLYCEROL	3-B-D-GALACTOSYL-SN-GLYCEROL [ C9 H18 O8, tgt=88.28, overall=88.28 ]			(255.46053, 18636.229)(256.01053, 4688.0356)(257.10944, 1625.52)(258.1103, 93715.56)(237.80153, 4077.8171)(239.26509, 1679.0801)(239.1002, 559.02)(255.27577, 18339.71)(256.11414, 4937.0)(239.1552, 2864.1252)(239.77162, 2049.87)(242.1113, 751.42)(272.5779, 6358.752)(256.89978, 1825.5385)(257.8307, 5734.595)(278.95627, 6573.286)(279.9325, 1246.3667)(282.0991, 5078.96)(262.19815, 7954.621)(260.0768,…	17.4672
HMP	17637444	558549	695350	633343	1	19228166	13817642	19557992	23131504	1	1141064	1	8718812	420585	323903	1343261	3070045	18031632	1	711816	1	1623301	1900482	1527451	1552834	11328165	1300424	1254361	1880603	886288	1612112	720339	HMP	HMP [ C6 H9 N3 O, tgt=71.44, overall=71.44 ]			(139.71587, 3195.4922)(121.50887, 116359.64)(122.06719, 12615.7)(142.01161, 11378.676)(123.92738, 16309.267)(141.50357, 29562.92)(143.1038, 1618.78)(164.8889, 48311.723)(165.97249, 123486.94)(167.07565, 15372.498)(147.33977, 11868.994)(148.16049, 16144.0625)(149.06174, 315.47)	10.1864
2-AMINO-4-CARBOXYPYRIMIDINE	9832569	8943312	13429802	10889745	1369557	11765491	10372379	9689973	1445185	8366164	6537092	8454563	5131192	7599062	7598968	4429232	7579528	8599526	6705653	10011428	11353806	3968123	1350504	4384172	4234324	5218594	9680152	8871042	9554880	2118114	8209310	9266100	2-AMINO-4-CARBOXYPYRIMIDINE	2-AMINO-4-CARBOXYPYRIMIDINE [ C5 H4 N3 O2, tgt=86.64, overall=86.64 ]			(139.03932, 24178.67)(140.04266, 1484.2213)(141.0513, 139.91501)(121.02852, 235001.72)(122.03166, 17038.36)(123.03602, 723.68335)(156.32367, 9347.472)(138.05539, 563.07635)	23.5179
CPD-11939	996409	834235	586283	416103	379168	1318342	2479408	285801	6209736	1436853	2043413	634729	3076058	602853	681484	1	1	1	1	1	1	1	1	449600	1	1249178	736914	1	1	1675855	1	1269885	CPD-11939	CPD-11939 [ C6 H6 O30 P8, tgt=44.20, overall=44.20 ]			(808.45026, 2229.075)(809.1979, 5566.905)(810.6953, 3949.05)(787.66547, 20158.535)(788.6658, 3784.2937)(789.66925, 71.105)(810.7013, 48.87)(811.7053, 234.1)(792.6817, 156574.97)(824.7204, 204.96)(806.83704, 6012.1846)(806.7097, 5021.984)(807.7092, 2143.4102)(808.7076, 622.51)(829.973, 5277.4224)(831.17413, 7266.92)(831.92175, 3760.5825)(832.6719, 2615.57)(812.2942, 8697.482)(813.6723, 7183.1313)(…	27.9419
CPD-11938	996409	834235	586283	416103	379168	1	1	1	1	1	1	1	1	1	1	1	1	1	1	1	1	1	1	449600	1	1249178	736914	1	1	1675855	1	1269885	CPD-11938	CPD-11938 [ C6H6O30P8, tgt= ]			(808.45026, 2229.075)(809.1979, 5566.905)(810.6953, 3949.05)(787.663, 26358.088)(810.7013, 48.87)(811.7053, 234.1)(792.6819, 194156.69)(824.7204, 204.96)(806.37726, 8006.4883)(806.7097, 5021.984)(807.7092, 2143.4102)(808.7076, 622.51)(830.17426, 7854.353)(831.3382, 13575.29)(832.3401, 4944.9497)(832.6719, 2615.57)(812.2407, 3083.2544)(813.6655, 9406.44)	27.5693
CPD-10235	392223	27671916	26421336	26391964	25344952	25539020	337233	22507468	340457	18075312	319315	20363364	23766698	297627	20471744	21738004	20984596	23270858	16917814	24192824	5131599	4101915	4150544	4618700	3711380	3829422	3546962	2695843	3648728	3734758	2865750	2980248	CPD-10235	CPD-10235 [ C23 H34 O23, tgt=74.18, overall=74.18 ]			(697.1891, 11325.688)(698.1914, 4015.448)(699.1948, 533.17596)(679.1783, 307450.72)(680.1814, 118756.8)(681.1839, 28482.81)(682.1858, 4964.759)(683.18854, 608.75385)(703.94794, 1402.4913)(705.14435, 427.76334)(689.1497, 16612.709)	22.2703
CPD-7557	27553732	30935020	32012744	20316150	29639878	29075068	33567352	31093106	47102512	7855422	11601409	25277712	32592620	39847328	36743900	37124104	30483468	36981240	45945760	18372252	20793116	21603480	30447282	24997620	1	12609677	29362576	29863664	30780368	29385356	16639711	21209432	CPD-7557	CPD-7557 [ C15 H22 O, tgt=86.02, overall=86.02 ]			(201.16055, 18189.03)(241.15608, 294878.0)(242.15889, 43818.61)(243.1525, 176.88)(201.16109, 15168.51)(219.1712, 56754.176)(226.65535, 4493.2305)(227.88995, 5072.394)(228.16347, 3027.5)(223.20665, 2485.8462)	2.65325
CPD-7558	16727901	15373864	23966180	21796556	22672864	21537620	22693304	23676280	21184450	7757200	11013405	23740264	15995328	16969968	28708946	23253192	11588398	15652300	17934980	20827072	25236882	24523698	17102504	24008108	13791003	10462497	22233816	11852431	13158029	16220161	11686559	10003711	CPD-7558	CPD-7558 [ C15 H24 O, tgt=98.33, overall=98.33 ]			(221.19035, 279821.0)(222.1936, 48351.13)(223.20018, 6813.344)(224.2008, 475.04)(203.1797, 716225.8)(204.18233, 105914.484)(205.18742, 9293.481)(206.18999, 323.285)(238.2178, 728.2845)(243.1706, 315221.6)(244.17326, 78042.914)(228.17006, 43508.137)	22.5838
CPD-7556	16727901	15373864	23966180	21796556	22672864	21537620	22693304	23676280	21184450	7757200	11013405	23740264	15995328	16969968	28708946	23253192	11588398	15652300	17934980	20827072	25236882	24523698	17102504	24008108	13791003	10462497	22233816	11852431	13158029	16220161	11686559	10003711	CPD-7556	CPD-7556 [ C15 H24 O, tgt=98.33, overall=98.33 ]			(221.19035, 279821.0)(222.1936, 48351.13)(223.20018, 6813.344)(224.2008, 475.04)(203.1797, 716225.8)(204.18233, 105914.484)(205.18742, 9293.481)(206.18999, 323.285)(238.2178, 728.2845)(243.1706, 315221.6)(244.17326, 78042.914)(228.17006, 43508.137)	22.5838
CPD-7554	9323495	4587223	5003308	10782565	4335331	7585968	7753167	3260903	2506882	2209433	1832351	4836956	2451730	2613784	3547822	1097129	2934454	2062234	1026302	6466103	2250775	3506695	9031944	4864160	3767170	3092113	6429501	7232094	6024880	3056148	3117232	4047815	CPD-7554	CPD-7554 [ C15 H24, tgt=98.14, overall=98.14 ]			(205.19533, 186569.53)(206.19844, 32968.17)(207.20204, 2186.9683)(222.22198, 1378.9202)(227.17587, 17514.283)(228.1703, 4281.22)	26.6488
CPD-11940	3738925	386904	9890090	3661896	1	1	6347021	6584977	4556133	920766	2016421	1	1	1	4830111	1808853	8043470	1	1	15626484	8026581	9405693	10078079	12165852	5567025	2710045	4623724	10053034	8311387	12119341	5832466	21550126	CPD-11940	CPD-11940 [ C15 H14 O5, tgt=85.45, overall=85.45 ]			(278.97513, 9443.0625)(279.0945, 13499.98)(256.07397, 2771.7798)(278.10193, 6613.0356)(257.08145, 258454.98)(258.08505, 41570.71)(259.09113, 11823.63)(260.0961, 799.4567)(292.2775, 923.8752)(294.12576, 2628.0051)(274.88577, 396.11108)	23.8881
1236-TETRAKIS-O-GALLOYL-BETA-D-GLUCOS	450719	300773	384049	223042	211359	137009	1	1	157429	98426	169458	580818	89651	952543	323875	690298	1	388392	846527	598257	452100	539859	267508	375885	198749	556628	653955	296230	187315	628487	669455	332038	1236-TETRAKIS-O-GALLOYL-BETA-D-GLUCOS	1236-TETRAKIS-O-GALLOYL-BETA-D-GLUCOS [ C34 H28 O22, tgt= ]			(806.1356, 14373.9795)(807.1387, 3391.0864)(793.1183, 911.56)(796.47424, 288.46185)(797.0983, 548.85596)(798.0973, 271.36444)(789.145, 505.4112)	2.12047
CPD-7559	33806604	26383786	1	30602184	1	45507112	1	1	1	1	1	1	1	1	1	1	1	1	1	1	16063416	1	13294253	10272304	1	10359049	10713783	10084299	13280567	1	19723538	1	CPD-7559	CPD-7559 [ C15H23O2, tgt= ]			(235.16844, 53894.406)(217.15596, 741587.8)(218.15947, 92240.66)(237.85054, 17972.096)(239.18718, 11873.329)(240.1922, 219.07)(219.17155, 66853.6)(220.1756, 336.47)(254.87718, 11140.097)(256.0114, 2424.923)(260.1661, 160291.3)(241.1524, 14215.648)	26.2345
CPD-12266	431789	433591	509510	425250	664998	403984	514537	473800	459446	4796981	264228	1	311518	6037760	455799	382615	7979401	5592255	338384	646873	356113	318391	377979	435435	490376	462242	538638	244878	345459	507848	506247	784401	CPD-12266	CPD-12266 [ C3 H9 N O5 P, tgt=86.93, overall=86.93 ]			(152.0114, 7087.83)(153.0146, 116.41)(154.009, 179.73)(171.28746, 2059.0173)(176.0387, 110.57)(153.32953, 17728.146)(154.0216, 834.8252)(189.36864, 5527.92)(190.15253, 5771.563)(190.0535, 44.23)(170.91658, 9740.776)(174.21281, 6259.887)(174.30292, 3892.71)(193.0139, 786.87)(175.0026, 22608.555)(177.0015, 3286.57)	12.5091
CPD-17592	1	1210382	3599150	3649794	3460307	6042895	6793786	4294867	1189499	926790	785243	1172625	890461	801193	1071667	1261533	1	1080911	1591855	1267382	997130	3985728	1475747	3562995	4024451	1909394	1	1252110	7167770	3796476	3136145	1	CPD-17592	CPD-17592 [ C20 H22 O7, tgt=66.52, overall=66.52 ]			(376.64227, 6340.329)(377.44293, 3762.952)(377.808, 9684.267)(378.1418, 14306.9)(357.87885, 10584.263)(358.25354, 3128.3564)(359.62964, 1247.54)(377.60696, 16060.388)(377.1493, 8595.853)(379.15594, 4080.545)(358.5494, 6445.013)(359.42773, 5154.3745)(360.64746, 3852.2102)(393.88394, 66760.74)(395.03604, 18432.236)(395.91052, 8730.72)(396.5839, 8966.453)(397.1782, 7407.29)(377.16995, 3956.581)(377.…	10.9167
CPD-17593	4082981	4049262	4472891	2537848	3214833	2338978	4201780	3724811	6710634	3711766	2611340	6750086	5794940	2676533	3134232	2664462	3307812	3355413	1	4639039	1423868	1555390	2328826	1663140	999331	5332439	2829427	3455733	1	2125539	1918137	2714456	CPD-17593	CPD-17593 [ C21 H24 O7, tgt=68.50, overall=68.50 ]			(391.27292, 767.94336)(389.1376, 206.13)(373.55273, 436.864)(392.66998, 570.33746)(374.86166, 1712.5951)(376.1626, 350.32)(407.23166, 2997.8552)(409.79898, 34269.207)(411.20172, 19843.555)(392.56802, 14675.716)(414.45258, 15129.34)(415.823, 38484.066)(416.15598, 54190.918)(393.19962, 49271.24)(395.04965, 3948.9973)(396.1226, 842.6333)	14.6893
CPD-17594	8889501	10523609	9772164	4045738	11371847	10537245	13423164	10684633	11544226	1	2998961	12237447	3247689	7292295	11162948	8332177	1574249	5558016	6732918	11745665	3722708	4419238	2240332	1892880	2297925	6425646	5633723	6299408	5948277	5479548	3669364	3460177	CPD-17594	CPD-17594 [ C22 H26 O7, tgt=75.01, overall=75.01 ]			(405.48502, 10657.54)(405.67703, 3932.4326)(387.83145, 19944.127)(404.9418, 7754.6177)(406.1132, 4703.776)(405.18335, 250.435)(389.00684, 9951.974)(390.17474, 4620.23)(420.735, 13098.011)(421.62204, 4146.9336)(424.0113, 11425.052)(424.71387, 18165.795)(425.2099, 7852.61)(404.63354, 2806.3806)(404.94534, 1673.7925)(427.74374, 189431.89)(428.63046, 7209.8086)(429.35538, 229770.5)(430.1742, 400.59)(…	14.6646
CPD-17595	9663262	8502419	11860516	13056612	11864819	13356764	16263243	13962287	11728761	3265284	1	11605760	11336384	9271091	14106254	7591471	1	4849080	7955557	15772529	4502617	4515600	4872391	5820297	5257898	3879325	5002089	4848818	4995514	6178422	4069970	8478024	CPD-17595	CPD-17595 [ C22 H24 O7, tgt=94.80, overall=94.80 ]			(383.1488, 214.99)(404.1728, 375.886)(421.1939, 308.77502)(423.1964, 289.44)(401.17886, 433238.84)(402.1823, 83403.9)(403.18457, 15150.437)(405.1909, 515.37)	19.5062
CPD-17598	3853561	2712365	4423772	2993795	2274265	2869859	3066635	2451715	2587707	1124880	1	2488567	2158628	1352149	2618618	2788452	2600597	1271095	2144866	3886686	5393336	1	5036791	6110233	4237550	1040726	2543754	3369715	4970979	1993995	3774302	1	CPD-17598	CPD-17598 [ C20 H18 O6, tgt=94.66, overall=94.66 ]			(378.10498, 7090.4263)(378.105, 3871.96)(338.1093, 23807.896)(339.11353, 4251.1606)(340.1137, 290.7511)(342.1196, 71.28)(355.1165, 4004.5461)(357.62424, 3770.6748)(358.1188, 5906.93)(359.1201, 3597.43)(373.14642, 284.095)(355.72162, 3106.976)(361.05786, 64350.56)(362.09918, 19062.45)(363.10306, 4313.4106)(364.1033, 215.42)(357.54596, 2584.2288)(359.15097, 2300.565)	19.7112
CPD-17599	7090488	2371782	33160196	9503752	3291412	8550014	14268373	19991684	8063155	1876142	3031459	6245133	3529228	4693727	19159028	20039552	5915021	4249825	18011820	12708439	7686860	8780503	11565093	55885432	4974827	5819587	10333205	40267032	10370231	50522440	33481826	1	CPD-17599	CPD-17599 [ C21 H22 O6, tgt=68.64, overall=68.64 ]			(374.95584, 10762.874)(356.09927, 22935.46)(372.6812, 3866.5654)(372.1543, 713.695)(373.1436, 1456.71)(354.38336, 6681.419)(354.98166, 2137.32)(392.83194, 9916.194)(393.1896, 698.66)(370.16782, 247720.77)(371.17133, 46571.492)(393.40588, 40978.184)(395.2981, 3554.695)(396.7316, 589.494)(375.12222, 34422.734)(376.2109, 5838.8496)	16.1163
CPD-6882	754399	1220558	953589	788172	650259	721930	469578	432130	1094675	776811	2558807	223754	580927	497461	761859	299910	3174606	676865	1102339	429439	448563	1136053	301527	1	1914260	402763	2039964	2693050	317984	2507418	2413934	3159141	CPD-6882	CPD-6882 [ C13 H7 O5, tgt=69.87, overall=69.87 ]			(228.02747, 1712.0533)(247.04448, 7763.097)(248.0481, 102.87)(228.4594, 2966.2854)(229.03448, 4106.1426)(261.1864, 22645.314)(262.1896, 2290.6714)(263.06946, 279.2875)(243.35443, 20897.527)(244.05696, 2544.8008)(267.0199, 137.24)(252.3539, 1192.4066)(253.01888, 739.26666)	5.6839
CPD-4743	25844952	26266016	30920322	20016644	27314748	24448788	30624216	27683576	46812064	1	12046366	1	29384886	41405764	41556240	32063640	15634630	35376964	40514324	30806772	29930356	16654240	30343392	34702232	1	19976240	28996184	29638166	25936800	1	24181168	21307036	CPD-4743	CPD-4743 [ C15 H24 O2, tgt=86.21, overall=86.21 ]			(237.18137, 6112.803)(238.18274, 756.48)(219.17056, 62945.676)(237.183, 4816.36)(219.17134, 51247.68)(259.52753, 10488.753)(241.15608, 303288.78)(242.15894, 44793.086)	2.65984
12-DIHYDROVOMILENINE	3825452	1706597	2060786	2602008	2351864	2690156	2450189	1447451	2382513	1070193	1853518	2685931	3785182	1	1534360	1461018	13490983	1525024	2965529	2597814	1	2112754	3441248	3156461	2944712	2774396	1929067	2457661	3170482	2498574	2178456	3426350	12-DIHYDROVOMILENINE	12-DIHYDROVOMILENINE [ C21 H24 N2 O3, tgt=85.93, overall=85.93 ]			(353.91064, 43349.188)(353.64236, 16591.055)(354.18124, 3276.07)(334.36652, 18558.336)(335.16766, 5189.059)(356.1963, 6350.63)(338.18604, 11891.768)(373.2869, 6169.2095)(373.22507, 6358.9775)(353.33557, 7943.3267)(354.11978, 4605.2056)(375.9015, 48723.566)(377.2095, 7477.352)(378.67572, 3356.342)(380.17752, 3412.4265)(357.20575, 28542.082)(358.1618, 6216.3047)(359.1623, 664.95197)	14.8921
CPD-4744	30198536	20355624	36514280	34373388	49214600	1	21736716	42269352	40128784	2816565	32144182	36901608	33509480	44997452	36067712	32894542	1	44925660	39495560	26020828	13912933	8116411	17108812	1	1	14051354	1	9964860	1	27577404	2226797	5463333	CPD-4744	CPD-4744 [ C15 H24 O3, tgt=47.68, overall=47.68 ]			(256.64346, 61256.082)(257.1876, 144753.78)(235.2461, 75654.59)(236.24774, 99881.28)(237.51898, 17625.348)(239.17497, 8134.126)(254.7735, 14499.15)(254.18085, 11558.37)(255.1749, 2078.1)(235.67105, 77069.914)(237.18205, 13898.96)(270.206, 187.435)(254.20274, 1113.9312)(277.28217, 19155.486)(279.0483, 21022.52)(279.92413, 22977.941)(280.17316, 19727.268)(258.15176, 10983.029)	27.3612
CPD-6883	754399	1220558	953589	788172	650259	721930	469578	432130	1094675	776811	2558807	223754	580927	497461	761859	299910	3174606	676865	1102339	429439	448563	1	301527	1	1	402763	1	1	317984	1	1	1	CPD-6883	CPD-6883 [ C13 H7 O5, tgt=69.87, overall=69.87 ]			(261.0642, 25987.51)(262.0676, 2827.79)(243.0532, 25947.6)(244.05696, 2544.8008)	6.70945
CPD-4745	33743000	1	10442697	24615404	18648540	1	17412544	1	48672800	1	20263590	1	31298732	1	37972744	9639373	31410414	22559984	30336828	45943680	1	6305386	7871675	2159816	5295118	4184093	3953958	3890434	8583365	12864234	7944358	4235768	CPD-4745	CPD-4745 [ C14 H22 O2, tgt=66.18, overall=66.18 ]			(223.76912, 10044.6455)(224.17001, 11223.187)(227.17747, 23900.717)(205.1523, 23833.58)(223.5708, 1740.052)(205.15845, 78315.74)(206.15605, 386.825)(240.19446, 12272.485)(241.197, 5189.9873)(225.19617, 66435.06)(226.19936, 9397.401)(227.20145, 1288.9751)(245.23393, 115641.97)(250.16565, 21027.89)(231.35248, 477984.9)(228.14082, 3122.4402)(229.13562, 212.80334)	19.3437
13-HYDROXYLUPININE	2253583	1	1373794	3020021	10257257	10099719	811240	1012976	655679	1	1	689926	4043672	2704938	883050	1885400	15668211	4895123	3023959	1839731	5251078	1662834	775627	2154720	532300	6251812	2137479	1423373	1921962	7066548	4694718	1060610	13-HYDROXYLUPININE	13-HYDROXYLUPININE [ C15 H25 N2 O2, tgt=70.76, overall=70.76 ]			(265.584, 27943.598)(266.57135, 5676.625)(267.2066, 401.5)(248.1839, 16156.388)(266.53488, 8142.6265)(268.2078, 153.22)(251.1977, 13430.332)(252.20166, 1962.2435)(286.23352, 1755.6274)(288.2379, 593.96)(267.7005, 11980.594)(269.22748, 2225.9358)(290.39508, 78723.164)(291.19043, 38194.297)(290.1788, 20898.67)(273.24747, 133491.38)(273.51175, 100447.39)(273.8478, 130381.57)(274.1825, 121599.57)	20.7144
CPD-4746	4610039	2238377	10103677	10277664	2152954	8788061	2721980	2249226	3015843	2685166	3191056	1832432	2913236	1	3384549	2403127	1701334	1791745	1256943	1130873	6878272	2160371	2425152	1902959	1875100	3560086	4110657	3515949	1120164	6035665	1938776	1	CPD-4746	CPD-4746 [ C15 H26 O3, tgt=55.94, overall=55.94 ]			(255.74666, 11051.898)(237.4085, 24807.982)(238.18318, 2436.1455)(257.36746, 3510.2234)(256.2053, 79.75)(238.34128, 26933.844)(238.1859, 7382.7935)(239.2006, 112.57)(254.44215, 2076.945)(255.209, 1280.14)(277.90482, 52677.59)(280.18262, 19084.7)(281.1865, 15348.18)(261.84128, 115531.664)(264.18097, 118846.914)	23.3138
CPD-6881	936670	711521	864066	997092	1139396	1169505	1247717	228829	1023769	291327	679869	1342644	1128928	937584	1318116	1261184	1	467294	942608	1249316	4501242	895002	1127341	1	1042164	802169	957595	859698	859659	1350751	684786	1402764	CPD-6881	CPD-6881 [ C13 H10 O4, tgt=84.21, overall=84.21 ]			(234.07639, 482.00116)(215.0625, 17468.03)(216.0644, 1302.92)(217.0683, 323.31)(218.066, 5310.94)(248.22588, 28664.963)(249.09555, 4655.3774)(250.0895, 134.79)(231.91548, 4148.5347)(234.66681, 3600.022)(235.09644, 1250.5139)	10.1519
SALICYLALDEHYDE	8135800	7525129	10611030	11021066	9152469	11721163	11520625	10832103	9531780	4026790	3571793	8621266	9438471	7892589	11112756	7566330	13769248	4917829	7614175	10777431	7775715	10789480	10629918	12724574	10224010	7356665	9289855	10223163	9682096	12918122	8727960	16983544	SALICYLALDEHYDE	SALICYLALDEHYDE [ C7 H6 O2, tgt=98.91, overall=98.91 ]			(124.04204, 3798.1538)(123.04432, 30098.35)(124.04439, 4161.717)(105.03327, 194035.03)(106.03694, 15937.731)(107.03931, 239.0089)(140.07043, 18096.143)(141.06827, 1916.3433)(142.06602, 371.095)(123.99787, 21880.879)(127.07495, 323.585)(129.02187, 6768.1924)(132.0317, 104.19)	7.4535
CPD-9800	6541902	7882337	1	7760003	6014883	5420204	5177475	1	5399029	1	1	4709274	5798750	3614408	3193676	4934354	1	5921613	7529593	1	16420216	1	9786935	1	14702589	12241471	12417426	1	3992190	3048176	3126411	1	CPD-9800	CPD-9800 [ C9 H8 O4, tgt=99.68, overall=99.68 ]			(181.05038, 11432.455)(182.05334, 1417.6044)(163.0392, 296348.06)(164.04253, 29301.219)(165.04703, 2502.2664)(200.58247, 9661.199)(202.08661, 20917.908)(183.83826, 22268.297)(185.0769, 10288.03)(204.0355, 124.96)(186.0252, 221.57999)	23.124
CPD-6886	59610916	56469584	59646760	74989576	71893648	73647416	72235184	71079864	55323716	1	4819269	68614344	1356008	11420832	49757528	1	6110220	23113916	16601990	57827424	34506332	25923404	12101389	1	17442264	16191076	39390152	26363440	14399382	29998092	43916480	25766230	CPD-6886	CPD-6886 [ C13 H7 O6, tgt=56.25, overall=56.25 ]			(259.24612, 200.15445)(243.8538, 1066.3453)(245.02106, 607.73663)(261.0767, 3848.9534)(244.02559, 584.4608)(280.8708, 1976.1449)(280.0698, 11199.41)(281.0717, 1168.34)(260.16095, 15844.375)(263.48462, 34102.4)(264.05695, 15379.188)(282.0132, 523.0333)(268.0158, 415.7)	1.8485
CPD-10244	10459279	8689601	8303002	11899912	8858964	6568085	7002509	5738065	3503731	1543630	3793551	7429441	5256247	3233718	6639326	7271541	1	4376657	3641175	3613506	8774895	10678895	8868209	6794713	11849425	8834500	7856286	8551582	15013723	10157162	12059539	7030313	CPD-10244	CPD-10244 [ C22 H31 O2, tgt=97.84, overall=97.84 ]			(327.23215, 119733.46)(328.2349, 46452.367)(309.22134, 113675.11)(310.22534, 29471.828)(311.23157, 1178.331)(329.12225, 43136.793)(313.2395, 1108.1833)(348.30804, 18984.33)(349.27524, 11462.45)(350.27814, 2394.8125)(331.2634, 383.12)(350.54218, 15087.068)(355.23892, 9062.905)(333.95657, 26842.484)(336.72717, 3724.1602)	25.0658
CPD-4748	749127	639708	1204763	774533	740838	1351430	762522	635738	1452212	8401969	4015321	520477	359215	406939	413308	589069	3331389	482274	311943	563058	758636	1368983	1017108	774907	914729	338328	2060923	329583	778839	1021755	1829876	2487943	CPD-4748	CPD-4748 [ C4 H9 N O2, tgt=47.58, overall=47.58 ]			(106.44478, 24001.377)(107.0708, 23353.55)(104.07075, 36442.816)(105.071335, 2644.8357)(106.066895, 1965.73)(124.99567, 9712.829)(125.1069, 15736.61)(103.0865, 3700.354)(126.16513, 2178.0908)(110.08908, 31003.99)(112.00762, 15311.452)(112.0507, 21690.75)	3.12353
CPD-6884	59610916	56469584	59646760	74989576	71893648	73647416	72235184	71079864	55323716	1	4819269	68614344	1356008	11420832	49757528	1	6110220	23113916	16601990	57827424	34506332	25923404	12101389	1	17442264	16191076	39390152	26363440	14399382	29998092	43916480	25766230	CPD-6884	CPD-6884 [ C13 H7 O6, tgt=56.25, overall=56.25 ]			(259.24612, 200.15445)(243.8538, 1066.3453)(245.02106, 607.73663)(261.0767, 3848.9534)(244.02559, 584.4608)(280.8708, 1976.1449)(280.0698, 11199.41)(281.0717, 1168.34)(260.16095, 15844.375)(263.48462, 34102.4)(264.05695, 15379.188)(282.0132, 523.0333)(268.0158, 415.7)	1.8485
CPD-6885	59610916	56469584	59646760	74989576	71893648	73647416	72235184	71079864	55323716	1	4819269	68614344	1356008	11420832	49757528	1	6110220	23113916	16601990	57827424	34506332	25923404	12101389	1	17442264	16191076	39390152	26363440	14399382	29998092	43916480	25766230	CPD-6885	CPD-6885 [ C13 H7 O6, tgt=56.25, overall=56.25 ]			(259.24612, 200.15445)(243.8538, 1066.3453)(245.02106, 607.73663)(261.0767, 3848.9534)(244.02559, 584.4608)(280.8708, 1976.1449)(280.0698, 11199.41)(281.0717, 1168.34)(260.16095, 15844.375)(263.48462, 34102.4)(264.05695, 15379.188)(282.0132, 523.0333)(268.0158, 415.7)	1.8485
METHYLENE-THF	883821	772395	8080085	7849901	5492382	750031	9864460	3522464	6535751	5112101	7597384	3085673	540355	3545265	8547316	6367804	1	3467073	5468625	8609434	4706053	4739131	2659135	989680	906268	1230981	1057521	2381187	2275471	2634610	839039	1	METHYLENE-THF	METHYLENE-THF [ C20 H21 N7 O6, tgt=74.37, overall=74.37 ]			(456.1566, 25716.367)(456.16104, 5403.89)(457.1603, 1740.05)(438.81485, 4769.251)(439.98413, 902.5867)(441.48486, 1528.291)(456.38165, 71376.52)(457.40036, 19247.402)(458.16678, 1195.6862)(439.89493, 9185.657)(440.09274, 1905.4885)(473.6652, 587243.6)(476.1991, 1081287.2)(476.20306, 334418.8)(477.20535, 47769.297)(456.0903, 14180.534)(457.63068, 18267.514)(458.68045, 12651.984)(460.18985, 7061.88…	13.3243
CPD-9807	3291803	3149306	126019	3165368	596794	3403889	1	2605359	2990182	952092	1289464	3035312	3140984	674965	2978451	3183626	4892589	2805224	869567	2638371	2802664	2753312	681196	389379	435068	718603	815019	697704	528527	544273	736045	191171	CPD-9807	CPD-9807 [ C10H10O5, tgt= ]			(213.79715, 4401.2017)(195.17363, 11593.74)(212.44872, 84988.57)(213.00009, 6439.702)(213.0783, 145.91)(196.727, 10285.616)(197.56375, 1729.82)(229.49132, 4176.929)(232.27963, 5009.0996)(232.09764, 3791.4922)(233.0968, 4505.37)(211.07904, 6810.0063)(211.07906, 1232.3817)(212.07309, 114.045006)(233.74509, 8329.484)(234.04631, 250.35788)(217.03456, 1675.6486)	4.48978
CPD-4741	80043904	1	216068688	25274972	92714768	92116968	90915344	165147456	121238320	1	165053920	126617112	122879712	165049312	127365264	92666472	1	193955376	153766000	99253160	27177674	109146848	18868784	41055452	29285720	38026792	34242688	11462756	40559032	6509313	20663164	10826457	CPD-4741	CPD-4741 [ C15 H22 O2, tgt=65.09, overall=65.09 ]			(235.23505, 76780.94)(236.27512, 101956.375)(237.1699, 17086.43)(239.17534, 8983.409)(237.37553, 63242.73)(217.15614, 861631.1)(218.15948, 108482.55)(253.78467, 1000.5908)(253.1924, 606.39)(239.19989, 1962.7609)(258.15192, 11452.807)(242.79083, 44880.24)(243.15102, 39263.47)	27.5869
CPD-9803	3291803	3149306	1	3165368	1	3403889	1	2605359	2990182	1	1	1	1	1	1	1	1	1	1	1	2802664	2753312	1	1	1	1	1	1	528527	1	736045	1	CPD-9803	CPD-9803 [ C10H10O5, tgt= ]			(214.56223, 6401.323)(196.0493, 1949.71)(213.19102, 141868.7)(214.06636, 17755.69)(228.88965, 2205.1602)(232.24104, 2952.9282)(211.41399, 7083.7563)(211.07825, 1252.385)(233.44458, 9599.648)(234.04634, 216.17627)(217.03485, 2477.6948)	2.69584
CPD-4742	80043904	1	216068688	25274972	92714768	92116968	90915344	165147456	121238320	1	165053920	126617112	122879712	165049312	127365264	92666472	1	193955376	153766000	99253160	27177674	1	1	41055452	1	1	1	1	40559032	1	1	1	CPD-4742	CPD-4742 [ C15 H22 O2, tgt=65.09, overall=65.09 ]			(235.16592, 69653.89)(236.16757, 104206.48)(237.17004, 20482.527)(239.1746, 8519.991)(238.1813, 251.19)(217.15605, 984711.8)(218.15938, 122835.06)(254.20345, 1155.8483)(253.1924, 606.39)(239.20015, 177.32)(258.15256, 8929.408)(242.92892, 45030.57)(243.1513, 47519.17)	27.4906
DOCOSANOATE	2054065	1556739	2702542	1662456	57934224	1753851	3100623	2013510	1270851	1631339	1514002	956538	4281655	7595901	89745560	5281402	2123766	1077535	6183572	1744651	176207	1371245	2709756	3092660	5832032	82877320	3602900	2315300	2514731	1	10821490	1679333	DOCOSANOATE	DOCOSANOATE [ C22 H43 O2, tgt=97.52, overall=97.52 ]			(341.47565, 3997.7673)(343.3386, 638.84)(321.3144, 45972.1)(322.3159, 16735.953)(323.32086, 8700.133)(324.3252, 609.98)(345.3483, 4293.4824)(324.828, 624.5717)(358.366, 5349.4897)(359.3708, 1440.208)(339.38574, 172473.4)(340.34872, 36675.51)(341.35062, 10729.123)(364.90414, 131696.55)(365.58606, 45830.918)(366.4851, 9473.699)(367.3321, 4125.6465)(348.22644, 874.0082)(348.319, 744.03)	26.5315
CPD-6041	329815	825604	267852	2220093	867596	574219	2948649	1652156	477160	1288621	1083371	1187692	557703	791625	1	856868	1	905646	878204	938409	543101	1236195	1203278	1087130	1224246	935862	898252	1	1194810	679019	500930	512595	CPD-6041	CPD-6041 [ C20 H20 N8 O5, tgt=71.10, overall=71.10 ]			(452.60098, 3483.5244)(453.16254, 1313.8036)(435.94962, 977.48456)(438.15503, 434.6925)(456.16666, 6154.2803)(457.16904, 3277.6726)(458.17407, 1781.1375)(437.60602, 2149.8645)(438.1563, 12666.79)(439.65875, 5368.575)(440.1615, 960.38)(472.4885, 188121.89)(473.8658, 416353.47)(474.5734, 124981.58)(475.2011, 1434.165)(454.12756, 11462.679)(453.51688, 4997.279)(454.51694, 1834.18)(477.15155, 2333.13…	15.4637
S-STYLOPINE	85782224	92759816	100815272	96772784	93400840	855124	1171065	1132324	1211720	1	71433472	1329656	709580	75812000	83215400	2513599	89409400	1	68813680	99085184	119439368	125993576	133001848	142729744	244442224	254517088	116711648	1	122998992	109570600	221967104	260470576	S-STYLOPINE	S-STYLOPINE [ C19 H17 N O4, tgt=73.29, overall=73.29 ]			(327.0254, 865.42303)(327.1243, 217.67499)(309.1134, 2223.29)(310.1185, 474.99)(328.13538, 891.75)(310.41202, 26205.379)(310.12506, 15730.0)(311.1299, 12264.11)(343.1573, 2591.157)(325.0137, 26224.479)(325.92496, 15464.9795)(326.14792, 9114.7)(346.10168, 4762747.0)(347.1045, 1165380.0)(348.10757, 146514.1)(349.1086, 21972.168)(329.6017, 9809.881)(330.80453, 681.2415)	18.921
CPD-10257	18800284	11132247	15689815	16986714	21968244	29457938	1	1	1	1	1	1	1	1	1	1	1	1	1	1	3821748	1	17408236	9182194	16954808	19698568	10480251	1	4501385	1	14753311	18934584	CPD-10257	CPD-10257 [ C22H32O2, tgt= ]			(328.23676, 37242.98)(312.0552, 11755.781)(333.59482, 12993.318)(311.2378, 233597.16)(312.24115, 53771.92)(313.24344, 6172.8286)(314.2422, 780.25)(351.00018, 5430.2744)(331.4002, 2835.234)(332.2805, 1456.24)(351.53928, 13235.74)(352.4885, 2268.4827)(333.22018, 141750.1)(334.22568, 33600.0)	26.0372
CPD-10256	23398264	1	1	15933514	11312153	7173514	1	1	1	1	1	10769927	13152472	1	1	1	1	1	1	1	41659956	1	1	1	1	1	1	1	17467782	1	1	13549773	CPD-10256	CPD-10256 [ C21H30O2, tgt= ]			(315.231, 10025.81)(316.2327, 2113.36)(297.77383, 18579.11)(300.22635, 111840.805)(317.49286, 17110.258)(335.26862, 2625.1147)(337.2743, 179968.28)(319.2613, 3727.09)(340.2251, 3368.345)(341.2211, 5143.05)(319.2044, 884698.06)(320.54062, 117073.016)	18.8503
CPD-10255	1631940	166847	142717	155063	925485	144191	362146	159864	166957	1	120398	249394	1	996355	268536	1	835884	115588	627161	157493	417917	563624	256809	1	237867	1	499803	508643	1	206904	1	1	CPD-10255	CPD-10255 [ C37 H56 N7 O17 P3 S, tgt=43.06, overall=43.06 ]			(996.93475, 924.39667)(998.2639, 585.1433)(1000.7845, 139.73)(1000.2709, 261.75)(979.2534, 1352.21)(982.2713, 3381.8416)(983.475, 2032.8279)(1014.18805, 5999.262)(1015.16473, 1993.0168)(1016.97876, 769.0723)(999.6338, 586.59)(996.2893, 250.38)(1022.52075, 9888.121)(1022.50037, 5678.396)(1023.05206, 1131.8561)(1025.253, 123.05)(1005.1095, 417989.16)(1006.2532, 236330.75)(1007.2554, 78571.34)	21.6371
CPD-10254	974353	3134349	1908449	684616	633171	3055081	1390233	477915	2878636	1557557	2022585	2283916	554129	385279	657189	335805	1448359	2809053	675581	2840733	615531	1	715388	1	584241	1396778	1352943	381387	427154	264518	510222	893503	CPD-10254	CPD-10254 [ C37 H58 N7 O17 P3 S, tgt=74.82, overall=74.82 ]			(1003.97186, 3295.1365)(1002.3096, 17639.26)(1003.3062, 871.11)(1005.3065, 5208.3)(1016.3174, 8193.066)(1017.5658, 1437.7051)(1018.57324, 4774.2676)(1020.6641, 2001.0934)(1021.3239, 3638.885)(1021.3173, 1597.29)(1022.3154, 2490.21)(998.55225, 16607.693)(999.6747, 8757.293)(1000.4477, 2214.4656)(1001.32025, 636.49664)(1024.2643, 321.67)(1003.09393, 804.0415)(1004.7527, 4750.89)(1007.2568, 7124.76)…	15.4503
CPD0-954	1	1	654293	905572	989874	436073	1	1	730788	325806	1372955	1	1	413884	1	1684677	749694	661726	1	1	6183773	4960933	1	1	1	1	1	1	3120044	4107593	1	1	CPD0-954	CPD0-954 [ C10H6O2, tgt= ]			(141.03145, 12082.3125)(176.07074, 64644.414)(177.07227, 6087.1084)(178.07765, 586.28)(159.79619, 13242.443)(160.05151, 1643.1383)(161.0416, 1707.03)(158.06065, 15252.84)(159.06372, 1267.49)(160.05977, 133.52)	16.3623
CPD-4750	5430580	8637091	1145139	5494478	5867565	1	6709013	1	1346108	1	1	1102565	7637912	5577111	1	1808305	1	1	1	1	1233140	2988612	1	3603757	4705014	1	2623420	4232580	2883633	4257045	4035051	1	CPD-4750	CPD-4750 [ C20 H33 O7 P2, tgt=73.64, overall=73.64 ]			(447.38342, 10229.257)(448.16003, 3587.6501)(429.9699, 5559.12)(432.56665, 1348.352)(448.45795, 18165.137)(449.17966, 7027.6025)(450.1975, 277.42)(433.8445, 4340.377)(434.67966, 4000.5698)(465.70425, 29306.979)(467.21207, 10636.561)(468.2062, 2930.83)(449.79697, 17945.512)(450.53418, 5885.5845)(450.20068, 6369.735)(471.60608, 1381.0244)(473.05637, 3982.3945)(474.04556, 3947.9006)(474.53427, 6982.…	9.92394
CPD-685	11264122	8202589	10726762	18181728	13234646	7431180	8104323	7587213	7546815	3605558	7798748	19267312	17055840	5310939	7086154	7040425	18979906	5841882	6103678	9964076	10857539	7232031	10405475	10152135	10921085	8138430	8889298	7252176	9657365	13674288	9265710	9449706	CPD-685	CPD-685 [ C10 H18 O, tgt=99.65, overall=99.65 ]			(159.15518, 1140.332)(137.13243, 406608.53)(138.13539, 42513.69)(139.1386, 2157.624)(154.159, 37878.227)(155.16212, 3875.4932)	19.3671
CPD2GG-5240	13171522	7191154	3167346	5486309	4722238	117799128	67611616	4993814	69105088	40818268	4541404	8954224	58613372	49299344	65545844	61742908	1	47779312	43814824	115629744	48493328	50879144	88178320	94987096	55132500	42460876	59687528	75893216	53705672	58403556	46653560	65405768	CPD2GG-5240	CPD2GG-5240 [ C30 H46 O6, tgt=88.96, overall=88.96 ]			(502.79803, 72095.305)(503.80136, 19106.93)(504.77994, 4259.861)(505.3371, 357.04)(484.31793, 2936.7122)(485.31268, 2712.71)(504.3368, 100496.55)(505.34, 26737.88)(506.3393, 5250.66)(487.58618, 6302.66)(487.73468, 4327.116)(488.3368, 5729.41)(524.4892, 5938.471)(525.7804, 3404.132)(506.3618, 349.61)(526.9316, 4282.7114)(528.7055, 6139.2554)(531.3332, 6312.584)(510.25232, 1856.267)(511.59607, 1116…	23.6359
1-PALMITOYLGLYCEROL-3-PHOSPHATE	5629448	4754349	7332261	6661972	1	5395503	4939170	4712649	5477768	1	1	1	1	1	4432068	1	1219439	3874079	1	6538305	4967428	5820706	7538578	7068120	6439632	5725787	5897117	6184604	4442391	6934916	4462436	4188304	1-PALMITOYLGLYCEROL-3-PHOSPHATE	1-PALMITOYLGLYCEROL-3-PHOSPHATE [ C19 H37 O7 P, tgt=91.18, overall=91.18 ]			(391.34323, 5972.363)(393.7216, 902.875)(434.43726, 17574.143)(435.89294, 16317.735)(392.39175, 1438.7856)(394.7353, 331.715)(429.2702, 593.875)(410.2379, 39673.684)(411.2402, 5984.237)(413.55045, 9695.579)(414.04947, 5123.948)(414.2466, 3124.45)(416.21262, 350711.88)(417.21585, 68257.53)(418.21753, 20656.729)	10.0532
L-2-AMINOHEXANOATE	306436704	1	244131392	312008128	1	289058272	287976128	297834752	289405248	263696288	352549024	297430848	1	1	1	1	1	1	1	1	274920320	1	1	234039920	1	1	1	285127360	5986659	6249855	1	1	L-2-AMINOHEXANOATE	L-2-AMINOHEXANOATE [ C6 H13 N O2, tgt=97.62, overall=97.62 ]			(134.10034, 1589.655)(117.0926, 8753.46)(132.10187, 58643.668)(133.10173, 7661.699)(134.09682, 4548.4087)(114.09179, 7716781.0)(115.094635, 621929.75)(116.09758, 38028.965)(153.13832, 4600.728)(158.49333, 37271.07)(159.095, 13666.72)(136.07431, 11873.733)	10.3834
ISOBUTYRYL-COA	1380440	1039885	794170	640862	526849	405177	1	1	1	1	1	1	1	1	1	1	1	1	1	1	1	1	1	1	1	1	1	1	1	1	1	1	ISOBUTYRYL-COA	ISOBUTYRYL-COA [ C25 H38 N7 O17 P3 S, tgt= ]			(834.1258, 120.45)(816.1212, 268.078)(818.1249, 179.63)(857.1285, 14084.296)(858.12646, 5419.587)(859.1285, 3143.945)(860.12866, 4078.0283)(861.1291, 2526.4365)(862.1285, 2351.1)(841.61884, 138.73)(844.1205, 231.105)	23.862
ALLOCRYPTOPINE	13711146	2079268	14926636	9610050	3835645	8550246	79246272	13953439	4343242	1943768	18581930	6309017	66924560	56469888	70813624	51514048	12169596	28295690	56712548	6572354	1	3847998	4849101	62592392	5698039	50502664	58822536	53795732	12020145	3827312	1	8655156	ALLOCRYPTOPINE	ALLOCRYPTOPINE [ C21 H23 N O5, tgt=74.49, overall=74.49 ]			(370.15903, 1923.9766)(353.22983, 2994.024)(370.50217, 211982.0)(371.17123, 60344.043)(352.88766, 4809.1284)(353.76587, 2938.1501)(354.66455, 2437.665)(389.32297, 2581938.2)(389.89508, 661966.0)(390.2028, 146539.61)(391.20184, 28013.234)(392.20663, 2716.6973)(372.1884, 49655.59)(373.2631, 13587.709)(374.19565, 3679.2)(394.65335, 3277.4993)(393.90518, 1093.3975)(377.55658, 10757.166)(378.42014, 25…	12.3628
CPD-698	4626251	4479621	4640113	4360107	5002057	4753518	2672063	28864392	21397332	31297996	22998936	22687364	33914088	39967856	25705828	28432804	7918513	11966020	20967192	14742481	25738052	1314295	72546128	100071256	80491864	118254864	1	106536416	83894632	94387744	1	82881768	CPD-698	CPD-698 [ C28 H46 O, tgt=95.17, overall=95.17 ]			(399.23206, 22325.658)(400.3615, 6908.4414)(401.36166, 1079.5975)(381.41898, 6203.9976)(382.3527, 1281.0701)(384.3599, 765.91)(399.36243, 172206.38)(400.54022, 43395.227)(401.369, 8474.269)(402.36313, 704.9861)(382.00003, 3861.0537)(382.75507, 736.598)(417.8215, 6401.965)(420.39627, 2063.55)(418.371, 153.86)(399.3868, 3321.3574)(421.44635, 5680.749)(422.5871, 2487.5925)(404.67044, 1549.0432)(405.…	29.5147
CPD-695	51103504	1	1	42369984	1	36844228	53036172	53965600	1	1	1	1	1	1	1	1	1	1	1	1	59797988	1	1	1	70169760	1	1	1	8656974	1	8943232	11530169	CPD-695	CPD-695 [ C20 H26 O5, tgt=71.41, overall=71.41 ]			(346.17746, 1072.3234)(328.16473, 7354.3613)(350.19888, 40577.633)(352.2026, 256.15)(330.17642, 95588.336)(331.18192, 15457.464)(332.18552, 1292.6866)(333.1848, 431.4)(366.5956, 14520.906)(366.46704, 1154.665)(369.2295, 25481.8)(348.9262, 58633.47)(349.92917, 26150.674)(350.8807, 7347.6235)(351.21503, 4873.155)(369.17163, 4560.6636)(351.85886, 11240.531)(354.16846, 12017.405)(355.16376, 16094.79)	20.2705
CPD-696	829262	11995535	9059273	1924041	219883	1809730	1355518	5529962	2009828	1260186	3227532	2544194	1	714146	2194241	8689878	939261	3043601	3414733	2146372	16447527	5592470	1031183	1845716	1539220	1414384	1937144	5489703	1233958	1658985	4840827	1	CPD-696	CPD-696 [ C31 H52 O, tgt=76.76, overall=76.76 ]			(442.60883, 2843.341)(444.70337, 2417.486)(445.08646, 4876.9863)(445.4211, 3925.87)(423.95966, 12191.017)(425.23477, 6054.063)(425.39835, 3847.17)(444.08487, 12684.208)(445.08728, 3460.2676)(444.919, 1045.995)(425.04498, 2962.9106)(426.4091, 1702.5099)(458.4349, 61.61333)(441.4305, 87.86)(465.6588, 3072.8325)(466.73767, 4188.9565)(468.07312, 12708.851)(468.4081, 2289.4)(448.24423, 4908.2095)(449.…	28.7485
CPD-693	3023676	5326476	2739658	4619725	1	2557679	3004784	2430507	3382070	1276824	1	2316125	22196904	4078132	3460923	3048381	1	9190171	4774667	1	3063975	9047141	4538405	1928383	1	1	10074283	3409952	3810467	10982273	8183106	3690673	CPD-693	CPD-693 [ C15 H19 O4, tgt=69.22, overall=69.22 ]			(266.1342, 1181.258)(245.66397, 129703.7)(246.12857, 46823.277)(247.12798, 10537.036)(266.87823, 4644.8022)(247.12865, 2269.06)(283.2202, 51961.195)(284.23404, 8056.409)(265.62024, 16434.979)(266.49448, 98141.29)(267.1636, 32772.74)(288.24454, 9718.321)(289.18234, 19366.998)(290.22815, 12394.7295)(291.1298, 2807.73)(268.6074, 11313.959)(270.44577, 2822.077)	8.646
ETHIONINE	1664850	1634330	2044310	1788209	1518894	1364335	1279261	1284577	1822674	3291633	3855008	1000662	557750	3293610	1386992	657992	1865234	1686095	5297022	1465992	1419221	1033396	2361716	1630642	785176	2648294	1671298	1186870	1484714	1268799	991731	4964590	ETHIONINE	ETHIONINE [ C6 H13 N O2 S, tgt=98.67, overall=98.67 ]			(165.40234, 8078.28)(146.2002, 31538.912)(164.26126, 76518.16)(165.27045, 5207.694)(166.0709, 3444.65)(167.0744, 482.3)(147.9357, 20226.814)(148.97672, 3417.3105)(149.06091, 6768.2246)(182.59866, 3917.071)(182.09575, 2110.71)(166.08801, 2098.589)(189.0533, 1076.0056)(169.38046, 7119.7734)(169.052, 3241.9)(170.0462, 2225.08)	1.92384
KYNURENATE	260981	338472	241043	223280	269233	219433	250096	210987	346807	251652	270020	288163	243140	219411	228528	219465	247374	290375	199771	201584	445357	510625	1066705	683936	456516	1325945	1213140	998445	403292	596318	887287	725345	KYNURENATE	KYNURENATE [ C10 H5 N O3, tgt=69.27, overall=69.27 ]			(189.03558, 69078.25)(190.15134, 5698.6094)(191.04128, 1462.2318)(174.46556, 268.03)(207.00307, 8396.192)(208.06935, 450.05383)(189.05576, 364.07874)	13.7579
UROPORPHYRIN_I	186246	1	169391	207289	161638	218949	1	165588	1	1	1	1	145273	179379	188949	167097	1	1	1	1	1	1	1	1	1	1	1	1	1	1	1	1	UROPORPHYRIN_I	UROPORPHYRIN_I [ C40 H28 N4 O16, tgt= ]			(826.18195, 763.62006)(827.1843, 167.28)(843.1969, 16446.668)(844.2003, 6897.421)(820.1753, 3087.462)(821.17755, 327.336)	13.8658
CPD-14404	1	117686560	114848832	67946040	98251352	2811032	6967550	2042623	2777211	2181047	3624144	117343888	2887524	4088371	3306696	4956327	20998534	1932569	2695799	2241942	6203830	3745434	1441400	839442	1050500	1555679	1	4344137	891696	4150011	3006063	3364780	CPD-14404	CPD-14404 [ C41 H62 N7 O18 P3 S, tgt=71.22, overall=71.22 ]			(1065.3221, 3216.5352)(1066.3118, 437.10248)(1050.057, 2952.6587)(1051.0602, 3499.916)(1052.7104, 2429.75)(1054.3113, 9825.3)(1067.3196, 1907.1199)(1071.4542, 1723.3363)(1072.8403, 2220.2166)(1073.3398, 1156.19)(1049.3102, 24838.2)(1050.3126, 43885.434)(1051.3121, 2688.6096)(1052.6736, 3886.3467)(1053.674, 9650.454)(1054.6743, 10049.3125)(1055.3077, 7957.5703)(1083.5101, 2441.3235)(1085.8503, 670…	27.0606
CPD-12299	1	26537644	22048218	14551963	14255154	12665308	13459957	6423999	16460827	14826639	12021788	5759620	649925	4831618	4058145	4573603	681757	4667051	2221015	15032255	8883840	2054603	4376842	5584013	4201936	1	1	5997746	1	9838764	5560593	1	CPD-12299	CPD-12299 [ C12 H23 O3, tgt=72.15, overall=72.15 ]			(219.17424, 174619.2)(220.17696, 23055.803)(200.0865, 21853.738)(201.1622, 37127.13)(221.18806, 5801.1274)(202.91383, 21416.137)(203.1779, 39412.68)(234.78795, 2682.8225)(216.19339, 32016.45)(241.20027, 105608.66)(242.7402, 237947.17)(243.17055, 182671.94)(222.15118, 147655.62)(223.15439, 19111.264)	18.2978
O-SUCCINYLBENZOATE	1484939	1	1667266	1607489	1570682	1557722	1621725	1466227	2216070	2063458	1613598	1137911	1749074	1313772	1167449	1564471	1	1241540	1	948496	1191891	808357	771177	734038	770981	1344141	832977	854243	825025	932292	944399	875437	O-SUCCINYLBENZOATE	O-SUCCINYLBENZOATE [ C11 H8 O5, tgt=47.52, overall=47.52 ]			(244.02664, 1057.0701)(203.03171, 5505.837)(204.0296, 314.07)(221.04018, 1795.688)(239.25163, 375.38882)(240.07368, 191.174)(224.05371, 167.6157)(228.02652, 1454.8683)(221.06523, 3853.075)(223.06554, 600.28)	2.13865
O-UREIDOHOMOSERINE	1803865	1	1	1361908	1	1519666	1	1393822	3242488	751218	906634	2048725	2249026	1179679	1319167	869422	1554634	857912	3381610	2142922	1832380	1433862	1162605	1187081	2070981	3527335	1860993	1497211	1537380	1653310	2470363	1	O-UREIDOHOMOSERINE	O-UREIDOHOMOSERINE [ C5H11N3O4, tgt= ]			(178.23497, 2518.4553)(178.47789, 167.82199)(159.77977, 4288.4077)(160.05841, 77.490005)(180.6319, 4223.782)(161.8926, 9641.937)(163.27805, 7055.836)(164.0796, 5680.37)(196.1124, 9662.986)(198.11255, 776.73)(180.02902, 3654.6123)(202.0676, 7939.527)(203.07034, 1574.5752)(204.3219, 2243.4202)(182.05305, 4525.301)(183.0613, 292.125)	13.5323
SUCCINYL-OH-CYCLOHEXADIENE-COOH	1130647	3543913	1632241	1713294	1098509	1723862	3304300	2612474	596123	3111480	3115708	1811663	2356219	363030	1861578	2103658	1	1	2213744	1356753	216841	348412	324723	965534	1139928	416111	411920	1728998	1235613	1134391	1404143	1281746	SUCCINYL-OH-CYCLOHEXADIENE-COOH	SUCCINYL-OH-CYCLOHEXADIENE-COOH [ C11 H10 O6, tgt=79.88, overall=79.88 ]			(241.38722, 307.42)(221.04022, 1125.1664)(240.05705, 473.66998)(240.0536, 52.59)(223.45222, 316.23798)(256.08243, 13594.365)(257.08612, 1231.0798)(240.17195, 612.5657)(241.07912, 1083.0167)(261.0379, 3875.769)(262.0481, 700.6633)(244.77974, 267.2275)	2.63006
CPD-659	4181183	3358028	1683960	3158928	2886203	3046714	1689949	2297594	2134625	932297	1	3289601	2132495	1756554	3449510	2546757	1	1161918	1388036	1131510	2397803	2547781	2351418	2227611	2122289	1179810	2043745	2753161	2933081	3824426	1785470	3418980	CPD-659	CPD-659 [ C10 H12 N O5, tgt=98.34, overall=98.34 ]			(230.55762, 678.88763)(212.19667, 2314.6548)(213.07135, 2821.2258)(229.28511, 777.18)(211.51128, 1466.1287)(246.94466, 8491.042)(246.86137, 5234.5825)(247.111, 7041.52)(228.24454, 999.6222)(229.2249, 1878.9313)(230.1018, 2564.74)(249.06113, 43090.746)(250.46594, 2370.571)(251.06628, 364.65665)(231.05045, 71339.54)(232.81548, 2636.1938)(233.05568, 948.18994)	16.3086
CPD-20125	972363	1218872	1252552	1426864	1591872	1193981	778956	1094131	911042	4446443	2508688	876404	1353363	2815869	433100	863222	374371	818056	3161290	560640	772000	732907	833436	725542	640896	1055613	586004	364987	580258	1694981	465912	2207452	CPD-20125	CPD-20125 [ C6 H9 O8 P, tgt=50.28, overall=50.28 ]			(241.00487, 72541.086)(242.00618, 21090.062)(243.98201, 10176.3955)(244.86829, 5071.428)(245.0171, 4422.1978)(243.0185, 1171.06)(244.0159, 1467.46)(245.0212, 2943.89)(262.0483, 207.49)(262.9896, 302.69)	1.17738
DELTA3-ISOPENTENYL-PP	389236	372228	383396	521442	514676	458575	389670	492246	398029	253500	337586	298665	355334	695503	181633	339309	536884	210046	480530	168465	242612	366467	257286	297724	291783	237329	257931	173283	311121	240800	240486	137046	DELTA3-ISOPENTENYL-PP	DELTA3-ISOPENTENYL-PP [ C5 H9 O7 P2, tgt=47.58, overall=47.58 ]			(226.18654, 1680.6233)(226.97493, 628.60156)(247.99965, 1217.5586)(230.61508, 64612.008)(230.9901, 100392.98)(263.42465, 54224.41)(264.02057, 6732.3794)(265.02338, 9330.655)(245.46086, 15207.223)(246.08102, 1795.2794)(247.016, 1153.58)(268.98264, 373.78302)(270.98364, 267.5217)(252.71545, 5725.6245)(252.97363, 4074.69)	1.56544
LUTEOLIN-7-O-BETA-D-GLUCURONOSYL-1-2	189840	176145	201623	214272	192207	189161	171830	159260	141202	1	139831	142846	128486	124576	137585	110652	110771	134665	1	134941	1	1	1	1	1	1	1	1	1	1	1	1	LUTEOLIN-7-O-BETA-D-GLUCURONOSYL-1-2	LUTEOLIN-7-O-BETA-D-GLUCURONOSYL-1-2 [ C33 H31 O24, tgt=46.60, overall=46.60 ]			(795.1055, 249.48)(829.6023, 1842.4045)(831.156, 936.58374)(817.1023, 1584.5316)(818.1058, 245.54501)	21.5218
CPD-6001	2494747	3396734	3353129	4200445	3747681	3427981	1	1	1	315455	2146866	2507197	1	4738577	2932435	4224942	1	2850272	2718741	2456310	2265971	1	1	1924532	1	1	2315888	1590971	3608268	4833916	1	1	CPD-6001	CPD-6001 [ C5H10O5, tgt= ]			(152.10507, 29952.215)(153.06071, 2731.815)(133.92029, 470.70374)(151.06093, 14977.264)(152.0658, 6488.58)(133.9086, 3104.8489)(134.0466, 76.27)(171.42917, 5105.4175)(172.31947, 6587.761)(150.07574, 22059.215)(176.25087, 175.92)(159.8434, 495.55093)	2.23047
CPD-676	555779	247812	553176	595366	1	1	1	713060	1	1	1	542747	1	1	1	1	1	1	1	1	262357	316820	798571	470325	342016	923710	887918	686557	491165	1	672269	514017	CPD-676	CPD-676 [ C9H7O4, tgt= ]			(179.89314, 16372.997)(180.03937, 1956.5121)(199.26308, 4153.3223)(200.23012, 4040.9219)(201.0791, 1620.8701)(182.9259, 19800.316)(181.0632, 178.435)(204.02884, 504.76)	10.4609
CPD-674	916735	2044613	1254976	1710476	1532511	1712439	1303014	1830377	1916492	597653	934873	1609221	1607235	1097248	1894401	1644425	1	798221	605132	1442463	1	743531	1542495	1739030	922147	1030396	693919	884294	1340919	2336161	908290	1973889	CPD-674	CPD-674 [ C9 H7 O2, tgt=70.74, overall=70.74 ]			(147.04381, 51242.82)(148.04758, 4386.6606)(130.035, 3217.1875)(151.25085, 3681.009)(153.0658, 98.21)(133.78836, 2113.6501)(135.05515, 1262.4551)(167.0208, 7113.748)(167.0846, 8936.07)(148.99782, 28486.16)(151.20287, 5223.9883)(172.37444, 629.15)	17.3392
CPD-669	634188	2008223	2021487	1061487	1	977028	1447200	1423903	1048341	1290660	1	985606	732404	657908	1131926	1	1	742815	882255	3111700	1634226	2106446	1704705	2459589	2941504	1	990779	4071629	3973788	1585601	1014117	2524593	CPD-669	CPD-669 [ C13 H18 N6 O3, tgt=83.28, overall=83.28 ]			(308.88037, 12897.512)(310.04733, 2615.2559)(290.38885, 5087.384)(291.63937, 6509.983)(293.14154, 594.48)(308.53177, 3419.899)(312.167, 4708.92)(292.6508, 3697.7202)(294.1539, 2812.35)(325.30975, 26164.527)(327.09232, 12213.406)(329.18915, 6901.9727)(308.50504, 12415.324)(309.67554, 8624.32)(309.1696, 6637.77)(331.1397, 1820.1621)(332.4741, 2828.3467)(332.1363, 3469.65)(334.145, 231.94)(313.4611,…	17.6488
CPD2GG-5257	17141722	428194	13333202	17913880	21441866	14998545	2265400	1	1	1	1	456323	436534	1	1	1	420988	1	536095	1	594877	1280555	711674	607310	579979	1931303	1	1	605977	277341	1	1	CPD2GG-5257	CPD2GG-5257 [ C54 H86 O25, tgt=48.01, overall=48.01 ]			(1138.8235, 4699.1514)(1138.5745, 5510.874)(1141.5784, 3386.2524)(1142.586, 294.98)(1122.7875, 2163.5334)(1123.2357, 2378.4216)(1124.5785, 5313.98)(1154.4453, 1447.3372)(1154.7959, 3177.56)(1156.1906, 1983.1721)(1157.3871, 2524.996)(1157.8413, 2852.505)(1158.8467, 2769.9626)(1159.5973, 1777.9933)(1137.2043, 1874.7823)(1138.7067, 2850.3962)(1140.8713, 1280.8457)(1139.5919, 4457.97)(1140.5891, 6557…	28.1427
THIAZOL-YL-INDOLE	996030	802175	671938	520857	1105800	1550182	1066516	1174400	1361586	1052033	986163	1919188	240477	805810	1379762	166546	1	1500555	1060838	2004964	183538	654655	1	1	1	1	535153	81257	469336	1861831	443323	520415	THIAZOL-YL-INDOLE	THIAZOL-YL-INDOLE [ C11 H8 N2 S, tgt=50.03, overall=50.03 ]			(201.04396, 13076.886)(205.0424, 2198.08)(204.21576, 1067.1549)(205.83516, 1559.7108)(220.1947, 8857.71)(223.74243, 15218.784)(224.02826, 11046.12)	8.57817
2-TRANS6-TRANS-FARNESAL	16727901	15373864	23966180	21796556	22672864	21537620	22693304	23676280	21184450	7757200	11013405	23740264	15995328	16969968	28708946	23253192	11588398	15652300	17934980	20827072	25236882	24523698	17102504	24008108	13791003	10462497	22233816	11852431	13158029	16220161	11686559	10003711	2-TRANS6-TRANS-FARNESAL	2-TRANS6-TRANS-FARNESAL [ C15 H24 O, tgt=98.33, overall=98.33 ]			(221.19035, 279821.0)(222.1936, 48351.13)(223.20018, 6813.344)(224.2008, 475.04)(203.1797, 716225.8)(204.18233, 105914.484)(205.18742, 9293.481)(206.18999, 323.285)(238.2178, 728.2845)(243.1706, 315221.6)(244.17326, 78042.914)(228.17006, 43508.137)	22.5838
CPD-14405	8813284	12820389	500602	347108	851085	15425530	30251400	25140592	9407917	5038446	17758594	1	21901968	6458114	31045692	8715954	6675869	17967980	12923326	1	26702384	21934958	3749976	2415746	3245756	1201044	4249163	588744	2229998	19478686	7259821	17061700	CPD-14405	CPD-14405 [ C41 H64 N7 O18 P3 S, tgt=70.45, overall=70.45 ]			(1067.6372, 3328.3098)(1070.5881, 3315.3628)(1071.8406, 1169.11)(1072.833, 1023.775)(1049.569, 14818.574)(1052.0603, 2137.5076)(1054.6603, 465.6467)(1056.339, 92.21)(1068.4116, 48883.434)(1069.3436, 26257.219)(1070.3375, 1489.6333)(1050.659, 27668.857)(1053.1125, 8041.35)(1054.0671, 2086.4475)(1057.3232, 131.65)(1086.6315, 1861.9839)(1086.3535, 214.04)(1068.3413, 20698.398)(1069.3435, 10132.246)(…	28.8413
CPD-13370	9454238	9591015	8915475	10075188	4683432	9776173	11324600	8145198	15838654	3354338	5790350	10897040	9360559	9632187	10224039	10143904	9294717	5952236	9282675	1	11340581	11621912	10633522	12936074	1	3789851	8290463	15881587	11926306	21949578	15726918	39018300	CPD-13370	CPD-13370 [ C9 H10 O2, tgt=90.50, overall=90.50 ]			(152.30847, 10752.696)(137.07184, 178.065)(151.076, 11155.424)(152.07172, 5339.4775)(153.06807, 175.89249)(133.06525, 230260.73)(134.06729, 30615.363)(168.1032, 22031.834)(154.03513, 13392.145)(174.90517, 2484.5608)(177.0701, 5347.6)(155.04697, 210743.81)(156.50061, 5689.9727)(157.05112, 410.39502)	14.4307
CPD-13373	23659112	32580116	1604340	25690868	6843031	4416838	8927399	12627964	1	64030116	5764468	4244192	18089648	22638572	18440176	14894244	56257712	9120585	11331599	4589229	1	1625710	1977027	7341398	2438152	9731821	9751291	9338206	1	3421882	1	2796980	CPD-13373	CPD-13373 [ C19 H22 O2, tgt=83.13, overall=83.13 ]			(286.37494, 136498.36)(266.63437, 27056.43)(268.29025, 26321.139)(268.4526, 18632.85)(269.1671, 18610.605)(286.8733, 365092.8)(288.1855, 67789.82)(265.49405, 35606.08)(267.72263, 25380.877)(268.91766, 32726.57)(269.16766, 24839.148)(300.1992, 298900.56)(283.22495, 14519.331)(285.08466, 32245.684)(285.1973, 53300.56)(306.73495, 31433.24)(306.87204, 7330.9814)(307.1679, 732.56)(288.55692, 3491.5938…	18.1049
CPD-14426	1	129468	1025242	130074	512763	586062	1301900	931281	119913	782978	714124	5115300	1	1935566	367856	3299056	866736	3675323	2096456	327303	688909	541839	142326	1	1	3606565	3677239	1	1	427428	1902243	3729062	CPD-14426	CPD-14426 [ C43 H64 N7 O17 P3 S, tgt=57.64, overall=57.64 ]			(1075.7662, 1279.4901)(1059.2107, 1644.698)(1061.3132, 1202.84)(1078.8362, 2046.484)(1079.3354, 728.82446)(1083.3524, 4656.949)(1064.4502, 3599.1711)(1065.324, 4534.21)(1094.6943, 2276.1199)(1099.383, 4244.52)(1100.3618, 1098.39)(1076.8544, 892.3287)(1079.3618, 1347.59)(1082.3629, 229.73)(1098.3098, 7510.1743)(1099.311, 1865.9062)(1100.3105, 56.64)(1080.738, 448.47574)(1081.3138, 311.95667)	20.5616
CPD-14425	11877203	15837714	16875526	9158580	9670878	8881486	13840130	8823452	19845480	8397765	14531309	17646056	10192182	5697208	8972985	9077248	6016702	15298337	7267944	20254044	3430825	5500950	10891869	8761865	3927765	11892962	13938475	5247143	3589294	8329582	6041382	13511749	CPD-14425	CPD-14425 [ C43 H62 N7 O17 P3 S, tgt=77.83, overall=77.83 ]			(1078.4829, 157.82834)(1080.312, 54.28)(1055.3066, 16890.49)(1056.3096, 3470.23)(1057.3052, 1020.0)(1074.3372, 10230.6)(1075.3369, 1932.08)(1078.3331, 1609.38)(1079.3351, 132.34)(1096.3624, 100916.516)(1097.4583, 37617.375)(1098.4608, 10763.018)(1099.3049, 2413.5564)(1100.3042, 108.14)(1080.7748, 10246.783)(1082.226, 10952.819)(1083.3536, 11398.1875)(1083.958, 6736.221)(1084.2921, 3957.9546)(1084…	15.0183
CPD-14424	14767364	19491738	21158160	11586297	12678265	11333010	16707358	11096798	23433754	9650144	16553728	21040578	12741872	7142366	11184131	11357659	6595112	18132012	9106049	23499092	8061564	6917858	13079196	10589728	5099484	14594706	16754822	6153382	4492379	10522056	7492399	15909996	CPD-14424	CPD-14424 [ C43 H64 N7 O18 P3 S, tgt=77.83, overall=77.83 ]			(1079.9492, 201.1509)(1080.3138, 419.12)(1114.5569, 1338.6667)(1115.4618, 257.6623)(1096.2994, 98719.516)(1097.3014, 37082.996)(1098.3037, 10607.651)(1099.3044, 2332.8364)(1100.2976, 194.265)	14.5021
CPD-14423	131837	25244456	26385320	14477637	826069	965230	871577	1035377	29971568	12419351	21442344	27283816	16333722	9015054	14259907	14686663	8460351	23178688	11134298	30826092	9931588	8682820	17165032	13685399	6311792	18875146	21544556	7928717	5409019	13261370	9364038	20620652	CPD-14423	CPD-14423 [ C43 H62 N7 O18 P3 S, tgt=67.58, overall=67.58 ]			(1092.6403, 309.72)(1072.294, 859.89996)(1073.3167, 355.11)(1092.3173, 18361.938)(1093.3206, 2600.375)(1094.3177, 1191.5024)(1097.3148, 481.32666)(1077.6398, 1509.5522)(1079.3016, 1834.33)(1107.3307, 5642.6426)(1108.3329, 2115.6375)(1109.3285, 1066.8267)(1089.8428, 641.945)(1091.3358, 623.79)(1092.3401, 1976.97)(1093.3352, 803.27)(1094.3394, 2026.82)(1096.3405, 1493.63)(1112.2943, 9944.1455)(1113…	16.1233
CPD0-1242	1554372	1135853	1	3394419	1408695	1	1547978	1486277	2768610	1	1942747	1	1	1179325	1505041	1	1	1231523	1	1511082	1215779	1449015	1	1921700	1693056	1231978	1	1	1531005	6328980	1	5719506	CPD0-1242	CPD0-1242 [ C11 H14 O2 S, tgt=93.78, overall=93.78 ]			(212.3223, 2844.6672)(212.73761, 1489.6501)(213.07239, 345.65)(196.81204, 5310.9824)(197.0627, 418.97)(214.45067, 5029.389)(212.0725, 145.25)(193.06871, 28693.234)(194.07259, 4846.4463)(195.06706, 2105.9856)(196.07826, 124.14666)(229.47093, 10867.48)(230.10338, 9280.815)(231.1045, 9314.95)(211.38113, 3871.7917)(212.42621, 15159.641)(213.0947, 2709.93)(233.39415, 18605.969)(234.56302, 1823.6351)(2…	13.4598
CPD0-1240	1	680803	1	817922	1	1	702824	674900	4288302	1116482	1018801	1	354457	2641114	553811	1045947	3599915	384527	1580181	1	1979751	1091474	566833	380793	1396127	412368	1329326	1040242	1591329	591997	1	1574746	CPD0-1240	CPD0-1240 [ C6 H14 F N2 O2, tgt=82.39, overall=82.39 ]			(166.53467, 10593.976)(147.66695, 5170.878)(149.096, 134571.42)(150.10016, 9571.757)(152.10684, 48324.25)(169.31744, 31875.9)(151.03954, 31885.201)(149.1002, 107.39)(187.14664, 42535.883)(168.6126, 8471.172)(188.61685, 14500.729)(189.09038, 1848.2723)(190.08577, 598.286)(170.08243, 29303.213)(171.41486, 3386.2302)	3.3545
CPD0-1245	605277	869468	15400469	16718535	16179756	15364420	15020123	14611085	24833620	25662080	23963752	12197026	21103554	1	15357355	19039226	1	13057608	11506039	10646810	265044	10964963	9790703	7012884	9568394	1328161	10622654	632009	302104	485758	11607791	516834	CPD0-1245	CPD0-1245 [ C5 H11 N O5 P, tgt=82.01, overall=82.01 ]			(199.04575, 3322.19)(200.048, 456.02002)(178.0242, 998.72)(199.23572, 1973.9655)(201.10437, 18796.98)(202.05643, 24937.477)(179.91101, 9743.291)(180.03885, 1043.8981)(214.80928, 10298.019)(215.87268, 18895.61)(216.06787, 1183.14)(198.88495, 3218.9453)(219.0268, 350005.0)(220.03084, 22797.896)(221.02652, 33846.164)	3.08044
CPD0-1246	2120664	1	5430680	840065	1	657908	4125094	544316	4137266	556243	1401809	488715	3588279	992829	976554	3818615	1	1	3195544	611725	3253022	4143190	6976235	1	1	1344313	7134081	7737220	8241979	1	9009002	1	CPD0-1246	CPD0-1246 [ C8 H15 N O4 P, tgt=95.69, overall=95.69 ]			(225.08835, 197.79001)(204.1683, 2211.606)(205.06946, 659.23254)(221.08118, 131261.77)(222.0848, 16789.049)(223.07921, 1029.9963)(203.07095, 6093.8716)(204.07286, 1004.09454)(205.06985, 316.37)(241.24533, 1348.5896)(242.29234, 1302.8429)(242.78337, 1654.6068)(243.1167, 4581.725)(222.41469, 2406.8699)(225.10886, 324.64)(246.40518, 3808.8286)(248.07784, 1591.1686)(230.06653, 946.264)	13.0926
CPD0-1244	37960744	13351679	50352876	55643520	53556716	64418952	61381716	17351492	19760928	3749396	11871029	5752971	17284582	7672900	17439260	47709364	15764604	10083984	37569536	14798742	13000305	7039326	14832364	19457684	4244759	8644516	5427118	9514337	51505440	55513432	11352828	16421139	CPD0-1244	CPD0-1244 [ C25 H33 N3 O3 S2, tgt=53.97, overall=53.97 ]			(487.9971, 26657.875)(491.9479, 9721.117)(493.2019, 2591.0151)(469.43405, 3955.49)(470.1882, 547.58)(491.3656, 11458.458)(492.3931, 3802.265)(492.8219, 13577.783)(472.44467, 7639.066)(473.59644, 5033.0713)(474.27975, 4231.438)(476.1943, 197.38)(507.65982, 9292.917)(510.05917, 5473.8086)(510.97876, 4781.792)(511.2249, 1765.61)(490.1048, 7375.3564)(490.39038, 3373.383)(512.86383, 5769.077)(514.7224…	14.6338
CPD0-1248	1	1521192	1	1359190	1259181	1	1028517	706938	2665216	1	1851102	964516	1474658	1137845	901740	1093055	6137167	1987803	1433922	1	1	1	1614379	2655105	2499940	2640726	2445668	1661588	1	2568249	1383293	2683171	CPD0-1248	CPD0-1248 [ C6 H13 N O4 P, tgt=83.50, overall=83.50 ]			(178.0506, 1972.81)(195.73344, 26900.797)(196.0696, 3613.8804)(197.0755, 374.344)(177.05487, 49626.61)(178.05841, 5125.569)(179.05305, 399.425)(213.67871, 9090.547)(215.01373, 6777.572)(216.0992, 13207.481)(196.62758, 3482.8152)(198.09038, 1238.8016)(218.052, 226.97)(201.0436, 6964.05)	17.7012
CPD-10893	3937327	4073960	9014541	2762064	1998529	3741980	1378435	1177491	1065751	1033937	875688	1031821	1338553	2565461	1672570	1278825	719708	1	2131225	1100612	1360571	1369188	1498040	1349825	1	3468248	4171282	1948487	697292	375765	820745	1138521	CPD-10893	CPD-10893 [ C15 H7 O16 S3, tgt=43.21, overall=43.21 ]			(539.1366, 727.965)(541.09534, 1280.422)(526.7538, 5489.928)(527.6677, 3549.7195)(527.8904, 1727.5376)(558.9181, 6705.8525)(542.9052, 3246.96)	29.1034
CPD-14430	2201115	1943450	2293136	2055702	1782744	1645784	2083256	1869588	1611190	902615	1242791	1975157	1590861	3071928	2005908	1825578	1562741	2007446	3737921	2296397	3065396	3722475	4180156	4309701	3748524	4119127	4996408	4505125	4197108	4528902	3988264	4483555	CPD-14430	CPD-14430 [ C10 H8 O4, tgt=85.96, overall=85.96 ]			(193.71227, 1622.4698)(175.03548, 1634.7515)(196.05933, 127.94)(197.0627, 356.9)(175.0374, 2186.1)(211.79564, 3289.1252)(211.0796, 1956.53)(212.07304, 91.020004)(192.06596, 64508.848)(193.0694, 7530.2065)(194.07872, 752.5693)(217.0346, 336.7817)	5.24828
CPD-10894	209044	305766	262510	340187	279078	245797	296552	219707	302928	1	1	161591	165086	117544	171262	126113	420295	1	137374	169295	1	1	1	1	114009	1	1	135108	1	124957	108504	125399	CPD-10894	CPD-10894 [ C15 H6 O19 S4, tgt=57.80, overall=57.80 ]			(622.85, 172.64)(638.10986, 10046.018)(638.8747, 2673.4778)(641.8652, 923.36)(620.8611, 457.66998)(622.8547, 248.84)(642.8306, 21145.64)(643.8332, 2950.69)(644.829, 11431.78)(645.8334, 1395.1)(646.8266, 2644.13)(627.8203, 654.225)	21.9215
CPD-14427	453350	214524	396461	410478	226989	390051	1	418216	1	1	1	303081	1	1	1	1	1	1	1	1	545459	613413	835764	950887	982694	1	1	1	1447208	788681	945905	1	CPD-14427	CPD-14427 [ C9H6O4, tgt= ]			(201.07121, 5670.1787)(178.11302, 17838.705)(179.11595, 1543.6456)(180.06635, 123.075)	9.21894
CPD0-1251	40402400	4232963	70486272	20837068	26046200	44487288	30932068	37030588	44343332	8107085	2908092	15228234	8682346	12537919	45793792	16838290	4745740	6919129	17502604	7045298	10899079	10514515	12913347	14041676	6231105	6662656	6132867	4732947	6477176	11767530	4941972	10797026	CPD0-1251	CPD0-1251 [ C15 H15 N6 O3, tgt=75.90, overall=75.90 ]			(330.97772, 1648.9398)(332.12766, 3248.4783)(313.25592, 1955.8191)(314.11838, 4767.8467)(328.12906, 1127.395)(310.1212, 149.15)(347.85272, 2276.0461)(353.74484, 1253.0249)(355.123, 456.79)(336.11044, 60842.79)(337.11432, 9920.911)	22.2256
CPD0-1252	8314762	29606104	5852356	9757538	25288276	25671692	13146328	6195475	11458710	9074583	5668210	30095564	26195330	19526010	18972816	20277318	1	26243136	19772556	39889824	61877012	5226777	30454374	5076811	3880661	4552674	2757326	9214121	4311416	4775396	9177976	4421705	CPD0-1252	CPD0-1252 [ C14 H12 N5 O3 S, tgt=76.43, overall=76.43 ]			(330.0704, 1363.37)(315.826, 1446.3364)(316.05762, 1218.9)(316.81516, 1023.91003)(352.60443, 1285.8175)(354.104, 2280.805)(332.08575, 118198.79)(333.08856, 20623.225)(334.0899, 2909.3938)(335.0938, 188.07)	19.2893
CPD-14429	428983	577703	458872	480374	654227	463441	487885	474489	426064	138486	264730	380035	455185	320949	357584	458988	1	347626	277577	269052	118469	144241	149478	233440	661676	211220	506003	581120	236403	1	581273	381715	CPD-14429	CPD-14429 [ C15 H16 O9, tgt=90.59, overall=90.59 ]			(343.54266, 4530.149)(343.58655, 3233.8052)(344.091, 3403.74)(326.27957, 709.112)(327.081, 4918.5024)(341.72934, 222049.4)(342.63568, 22492.969)(343.09323, 654.32623)(323.074, 14596.91)(324.07608, 2970.7573)(325.07285, 170.04666)(359.1145, 807760.94)(360.11658, 262644.47)(361.11884, 148897.14)(362.12125, 22413.148)(363.12476, 2160.95)(341.60748, 3256.475)(366.07666, 19842.072)(368.08307, 7320.267…	17.0203
CPD0-1255	1776145	1	3432215	5545029	1	1	1	1	1	1	1	5701849	4226322	3576611	1	4485045	1	5559349	4039887	1	3003330	4638978	1	1	1	1	5262255	7213398	5264705	3619996	1	6932980	CPD0-1255	CPD0-1255 [ C20H23N7O6, tgt= ]			(459.4845, 17111.23)(461.58356, 6957.496)(439.15796, 62345.87)(440.16135, 23593.264)(458.4682, 5391.1484)(459.8518, 3839.61)(441.27216, 42562.863)(442.2766, 9829.42)(443.84436, 2581.22)(444.17236, 480.59)(445.1857, 3291.15)(475.53748, 52920.504)(476.3506, 13700.51)(477.21118, 1692.98)(460.8689, 3865.9016)(461.2052, 9691.18)(481.8356, 8634.569)(483.16644, 12404.759)(484.16934, 3172.3916)(485.17258…	12.3754
PALMATINE	4573027	3397049	3077286	5178006	2820720	4713385	4546673	4634622	4313514	2374861	2965069	4237070	1452748	4060520	3082963	5653713	16210910	859498	3860328	5437999	1788939	2454960	3465721	4436778	1589109	1836682	3750804	3762405	1635347	2109421	2881678	2805073	PALMATINE	PALMATINE [ C21 H22 N O4, tgt=78.39, overall=78.39 ]			(353.55606, 231.116)(335.64847, 50563.406)(336.483, 18983.844)(339.156, 291.96)(355.88803, 56022.53)(335.65363, 7323.251)(336.1492, 3954.1833)(337.14224, 694.522)(370.87885, 42447.89)(371.7334, 11199.005)(375.20648, 13972.725)(352.17682, 43890.168)(353.18008, 9404.955)(354.181, 2318.0833)(376.0363, 2037.9889)(376.15, 2929.69)(359.36453, 2422.887)(361.1418, 501.06)	7.72172
CPD-6801	2622166	2219009	832078	3144814	2484301	2520928	701340	2608288	2407037	2382638	3035890	2144624	418440	1225745	2765134	2454694	1	1112238	1947926	2861629	556297	1	266517	1216276	207200	1593695	1	1	1	569033	617432	1	CPD-6801	CPD-6801 [ C13 H12 O4, tgt=60.48, overall=60.48 ]			(232.50432, 7446.2837)(214.81479, 13408.27)(215.72807, 1585.09)(217.06985, 1912.105)(234.13628, 1025.4722)(215.76816, 10403.699)(216.06651, 1797.6367)(217.06906, 258.25)(251.91211, 2715.0112)(253.11493, 197.43666)(232.15166, 65140.06)(233.898, 6096.611)(234.8485, 1482.1212)(235.1119, 462.3)(259.07184, 349.965)(237.05487, 416.79333)	12.4365
CPD-14447	100072	1637529	82510	1036899	1027496	84019	862804	718595	1328585	941531	81554	1406561	1565706	2433582	1004123	1266201	803606	1828366	2664577	1154143	261890	971956	111450	1168226	1226143	681955	105979	1675909	1380865	1250190	1503152	909195	CPD-14447	CPD-14447 [ C5 H5 O3, tgt=44.27, overall=44.27 ]			(113.853745, 1024.1024)(116.26738, 205.15074)(117.04013, 49.09)(100.03108, 131.34685)(132.8681, 27147.479)(134.4946, 1142.7185)(116.97853, 2102.9333)(117.05645, 2984.7852)	5.11087
CPD-14445	148802064	3375329	166946080	4893485	5228614	98632232	165076112	142892176	123108768	1899497	1	98519568	2227624	51887312	100207104	61390860	117120560	63227160	70143768	174315376	78643128	65741484	77445880	82012328	35211644	41285816	71683496	98802272	67933056	106436456	82516120	136215504	CPD-14445	CPD-14445 [ C14 H26 N8 S2, tgt=63.11, overall=63.11 ]			(370.16803, 311911.16)(371.17136, 59622.26)(372.1752, 10544.366)(376.40964, 108481.09)(376.1801, 48416.285)(390.26782, 104071.0)(391.33966, 22265.602)(392.47336, 4174.906)(393.87387, 5385.2734)(394.66217, 256.07)(398.1602, 216.51)	13.5183
CPD-13396	9323495	4587223	5003308	10782565	4335331	7585968	7753167	3260903	2506882	2209433	1832351	4836956	2451730	2613784	3547822	1097129	2934454	2062234	1026302	6466103	2250775	3506695	9031944	4864160	3767170	3092113	6429501	7232094	6024880	3056148	3117232	4047815	CPD-13396	CPD-13396 [ C15 H24, tgt=98.14, overall=98.14 ]			(205.19533, 186569.53)(206.19844, 32968.17)(207.20204, 2186.9683)(222.22198, 1378.9202)(227.17587, 17514.283)(228.1703, 4281.22)	26.6488
CPD-14443	2836585	4416791	3732161	2603944	2982755	2916769	3100520	2357643	189103	1350312	1295738	153856	2998667	4089627	3057827	2535748	5504998	3513431	901708	2142621	2162601	1317607	1053633	1838388	1070864	3534073	804965	1071586	1222532	1825257	381371	394069	CPD-14443	CPD-14443 [ C7 H7 N O5, tgt=69.80, overall=69.80 ]			(186.31685, 43385.164)(187.14137, 2694.6846)(187.03131, 3976.5605)(188.03577, 163.938)(168.19101, 4801.5693)(171.0296, 133.05)(187.29333, 2726.274)(172.7083, 1998.7866)(204.43811, 1555.5941)(205.06981, 671.92505)(206.0736, 104.1)(187.39404, 1467.9401)(187.06046, 549.875)(190.01299, 10434.158)(191.01515, 5516.85)(192.0109, 8258.09)(193.0037, 329.51)	2.72856
CPDQT-409	18029532	17587056	17040732	14458672	18550266	17061948	23209064	17627426	18781838	3363668	1	25655600	26508384	2082963	25640064	19341272	1	11457240	1908596	4370652	17797056	15731770	10103016	6683477	1488862	5907333	1	4413172	5232025	19395812	16112540	1	CPDQT-409	CPDQT-409 [ C12 H24 N2 O3 S2, tgt=63.44, overall=63.44 ]			(311.89825, 2243.648)(312.42648, 2515.757)(292.86984, 10909.954)(293.11084, 2142.5825)(294.50357, 3422.6335)(311.3784, 1315.8463)(311.46292, 9421.387)(312.1306, 53906.48)(292.83337, 3259.5293)(293.11823, 1260.7639)(328.15356, 61643.777)(329.15707, 12032.865)(331.1511, 57.32)(310.9772, 16187.325)(311.47803, 20811.562)(333.97028, 11183.031)(336.31284, 5657.8726)(336.73602, 2883.2397)(337.1128, 333.…	6.80169
CPD0-1265	6497245	1	1	4410058	1	4563879	528320	4780137	6171245	3928736	1426374	6598374	5045354	8414636	3889542	7160015	1	8880489	1	707008	3201217	1219322	2193415	8724019	1207715	961344	716599	15455139	12552163	1145652	3285553	1794031	CPD0-1265	CPD0-1265 [ C9 H14 O4, tgt=82.13, overall=82.13 ]			(188.26115, 6032.394)(191.10255, 2764.29)(170.00711, 6663.4824)(171.0859, 1915.7051)(190.60443, 5027.469)(190.10085, 2919.905)(172.55, 4434.4233)(173.0955, 257.83)(205.81877, 17105.871)(208.33565, 51285.918)(209.13503, 14167.38)(186.75465, 19566.064)(209.95824, 193953.58)(213.48943, 1600.9939)(193.07387, 12938.9375)(195.82877, 247.27751)	13.5434
CPDQT-408	15761612	17971294	17778712	16189068	15839131	15417803	14848846	13073663	18549208	5035828	7793257	16343728	5390201	18361250	4974013	13562670	18288136	19795582	1	5683643	18762872	11344645	3882519	15782511	4819713	21498336	21424700	7217716	1	10562451	10535483	1	CPDQT-408	CPDQT-408 [ C11 H22 N2 O3 S2, tgt=65.09, overall=65.09 ]			(296.10736, 2864.993)(299.1061, 200.17)(278.98886, 4830.156)(297.36234, 5281.1763)(298.41663, 1117.4259)(277.10492, 8947.987)(278.10684, 827.34766)(317.73618, 5004.7036)(295.08377, 5184.7734)(299.00247, 883.4331)(299.62564, 1283.2383)(298.1237, 26490.47)(299.1259, 6715.83)(319.44354, 8075.222)(318.90063, 1918.4808)(301.08624, 350.024)(304.0859, 97.6)	10.997
CPDQT-407	3878708	3706532	1	3332532	1	4178040	4760467	3586490	1	2075013	1748953	1	11961061	1335124	1	1183200	21989214	1	1	3459352	1	27626048	1	1	30078964	1380371	1	1	30652588	5241219	1	1	CPDQT-407	CPDQT-407 [ C10 H20 N2 O3 S2, tgt=51.57, overall=51.57 ]			(283.8386, 2450.7825)(266.0732, 347.26)(284.09952, 25153.996)(286.5231, 11617.526)(263.9461, 7770.306)(302.12317, 6627.1895)(283.71066, 2075.0786)(284.10825, 11927.699)(303.08377, 36563.94)(304.75027, 5683.987)(305.75037, 502.1967)(288.51395, 4415.286)	8.96523
TAXA-42011-DIEN-5A13A-DIOL	17206704	158634752	4276195	17225914	3952871	10920731	12366171	9898975	1	1	1	1	1	1	1	1	1	1	1	9873647	4217415	2318941	1	1	1	3809650	2416946	1	7797693	1	1	1	TAXA-42011-DIEN-5A13A-DIOL	TAXA-42011-DIEN-5A13A-DIOL [ C20 H32 O2, tgt=84.27, overall=84.27 ]			(307.2468, 360.26)(287.73694, 2112.345)(288.23834, 1210.235)(290.2452, 4450.5)(309.7596, 14927.459)(306.2527, 7799.46)(290.74744, 3174.2898)(290.24597, 1632.65)(325.92236, 14806.296)(323.2719, 8997.59)(324.285, 1833.05)(304.55, 545055.9)(305.26657, 129064.29)(306.27173, 82438.14)(307.2776, 15719.87)(327.2302, 11439.805)(328.233, 6597.39)(309.40158, 12557.719)(310.22324, 2125.845)	28.2152
CPD0-1264	1691689	1480707	2313807	1935922	2156878	2019630	1972139	1866130	2273536	1328937	2187689	1696912	1102636	1614357	868023	2267776	1	2083941	1120566	2340586	1912610	1823479	1537990	1205268	1558213	1479462	1497960	1621312	1872206	1620072	1913190	1774134	CPD0-1264	CPD0-1264 [ C8 H12 O4, tgt=82.20, overall=82.20 ]			(173.77724, 16843.096)(155.93668, 4276.972)(173.35657, 19286.402)(174.08417, 7412.7495)(156.53955, 4744.2935)(158.22226, 2290.8372)(192.75992, 19891.717)(194.03502, 9560.757)(193.61209, 6542.435)(172.09673, 16140.029)(198.72229, 9662.885)(196.871, 3503.2063)(197.0774, 89.71)(177.0545, 51954.39)(178.05836, 7872.4507)	12.5665
DOPAMINE	10824965	6967367	1	13943526	1	11418353	1	9969332	11132498	5072854	5629468	8425966	9997133	7783859	1	7681173	1	4709776	6902014	14621878	2971615	1	1	2834227	1	1	1	2617280	12543557	1	11316485	1	DOPAMINE	DOPAMINE [ C8H12NO2, tgt= ]			(154.08676, 22485.473)(155.08144, 1577.8031)(136.0759, 274652.3)(137.07874, 26910.287)(157.09773, 1086482.4)(158.10072, 90050.48)(139.0879, 8721.931)(176.02844, 901687.4)(177.08136, 102087.234)(177.1329, 22078.14)(158.87032, 654005.56)(159.1222, 104414.56)(179.29236, 1720.0688)(180.27121, 3383.2805)(181.17145, 8722.308)(182.09053, 3295.552)(161.5987, 7150.405)(163.07504, 24406.338)(164.07779, 146…	7.46919
6-OXO-HEXANOATE	817399	1	913628	623028	460650	3094925	669257	1202973	328767	1	443638	1	1031864	1390171	1294716	505306	2657368	1532746	863778	1101420	1007839	2425688	765784	907131	808440	1249019	1149690	715384	927337	550503	326023	2097257	6-OXO-HEXANOATE	6-OXO-HEXANOATE [ C6 H9 O3, tgt=93.22, overall=93.22 ]			(131.70486, 77284.19)(133.06544, 8579.905)(134.06667, 742.0627)(111.22979, 15397.367)(112.048225, 3836.0498)(131.10707, 49933.61)(133.0706, 1761.46)(113.236084, 9264.465)(113.06013, 1086.0634)(149.23807, 11192.268)(131.08286, 30041.703)(155.05136, 362.93253)(134.0339, 96.99)	13.6272
CPDQT-406	3100994	3259741	3360434	4748778	7753304	3382886	3173280	2916851	1	1667473	1783784	1	2667841	5358464	2612528	1758104	13019523	3752173	1494484	3026695	1546202	1008729	7871935	8994604	2180216	5796733	6258432	1	2236450	9683272	3757813	9006382	CPDQT-406	CPDQT-406 [ C9 H18 N2 O3 S2, tgt=47.05, overall=47.05 ]			(266.74118, 1627.5734)(250.18953, 947.865)(251.0643, 1297.88)(269.70612, 9062.154)(272.32748, 8288.909)(251.3706, 1084.441)(255.0666, 1182.48)(285.15714, 3772.8884)(286.3167, 1964.7399)(290.1072, 750.01)(268.92, 7279.706)(270.09323, 5726.783)(294.31158, 9711.307)(290.0724, 7226.36)(274.5522, 2360.0552)(276.0503, 43.01)	12.83
CPDQT-405	50227432	70551648	58741716	31908128	35168652	7041391	73920888	1	17015850	9267445	12562718	85283232	20792750	114067792	68802368	11719575	31958676	37248440	123669440	1	1	12647456	33215730	59779396	44206696	34125284	53169548	2170529	20899796	19647508	14412772	25404082	CPDQT-405	CPDQT-405 [ C8 H17 N O S, tgt=82.92, overall=82.92 ]			(179.56398, 3068.1267)(160.74707, 13557.955)(159.8387, 1612.245)(176.4795, 9637.652)(177.858, 658.7937)(179.108, 316.75)(159.13321, 23595.459)(159.45818, 36753.965)(196.09734, 27566.486)(196.73643, 60301.2)(197.1352, 89525.1)(176.54108, 366306.56)(178.87662, 2381.455)(179.12805, 2902.97)(198.869, 2138.8474)(199.08704, 259.26)(182.03363, 6857.0195)(182.91235, 40621.836)(183.07864, 73567.47)	16.2534
CPD0-1269	1	195251	115427	229003	250165	1	109682	122481	1	1164952	489547	1	1	495873	1	1	1694766	1	554288	1	1	1	92654	1	1	132206	1	1	1	1	1	1	CPD0-1269	CPD0-1269 [ C8 H9 Br O4, tgt=47.62, overall=47.62 ]			(252.4738, 4491.7676)(252.97354, 8689.97)(234.9633, 927.7675)(254.31734, 1098.4667)(230.9684, 2029.81)(269.0024, 2490.98)(270.0042, 147.81)(251.9978, 5708.35)(254.003, 159.75)(272.9562, 9781.048)(274.1003, 1006.68585)(274.95993, 585.43665)(252.94885, 1458.3501)	1.1849
CPDQT-404	2061432	1	3043860	2280776	2161009	1	1	2895200	3465291	1	1	1	1	1	1	1886535	1	1	1	2918246	932267	1	1	1	1	1	1171298	1	2561224	1	1	1	CPDQT-404	CPDQT-404 [ C8H17NO2S, tgt= ]			(193.6, 1271.0249)(174.09093, 9638.327)(178.08772, 3953.8687)(192.10454, 2593.7534)(193.10251, 140.42499)(178.0922, 2172.51)(210.3818, 70647.92)(192.6664, 14716.11)(194.39232, 33514.84)(195.12297, 31364.574)(214.5414, 2313.529)(215.8021, 1560.3915)(217.75249, 11107.987)(218.0852, 15755.8)(198.53076, 2406.043)(200.07579, 1752.4863)	11.3657
CPD-14450	418098	423412	2453878	393461	1409594	178833	187702	102563	336157	756170	1	274161	158959	158371	1	1	1039035	516886	334049	424603	202198	1	1	1	1	152439	219176	1	1	1	1	1	CPD-14450	CPD-14450 [ C31 H46 N7 O17 P3 S, tgt=40.31, overall=40.31 ]			(917.64905, 5398.039)(919.09607, 2005.2278)(916.2012, 3551.56)(917.2021, 4125.64)(918.2032, 1102.24)(919.2041, 1341.34)(920.206, 352.31)(899.18616, 243.77249)(918.9558, 4812.7026)(919.8752, 2376.9548)(921.19745, 440.315)(899.1839, 3194.8264)(900.18634, 973.105)(901.1918, 243.44)(936.9875, 314.62625)(936.2356, 152.62)(917.2183, 6032.7456)(919.2091, 3838.98)(936.1788, 172.54)	13.9196
[truncated: 3,506 more rows]
