# Supplementary material for: Nutraceutical Profiles of Two Hydroponically Grown Sweet Basil Cultivars as Affected by the Composition of the Nutrient Solution and the Inoculation With Azospirillum brasilense
Source: Front Plant Sci. 2020 Nov 5;11:596000. doi: 10.3389/fpls.2020.596000 (PMC7674207; doi:10.3389/fpls.2020.596000)
Supplement: Supplementary Table 4 — VIP discriminant compounds identified as discriminant from OPLS-DA in leaves of sweet basil plants. Plants were grown in control hydroponic solution, in a NO3– or in a SO42– over-fertilized nutrient solution, either non-inoculated or inoculated with A. brasilense. [file Table_4.XLSX]

## Sheet: Genovese VIP
Class	Compound	M1.VIP[5+1+0]	M1.VIP[5]cvSE * 2,44693	P value	Log FC ([Control-+] vs [Control--]) : Normalized	Log FC ([Nitrate-+] vs [Control--]) : Normalized	Log FC ([Nitrate--] vs [Control--]) : Normalized	Log FC ([Sulfate-+] vs [Control--]) : Normalized	Log FC ([Sulfate--] vs [Control--]) : Normalized
a diterpenoid	abietatriene	1.75892	0.511647	0.285324	4.89156	4.23083	7.15418	-7.32039	2.39407
a glycoalkaloid	α-solanine	1.68981	0.303184	0.490087	-3.00341	-5.57574	-8.48111	-4.81812	-4.38037
a brassinosteroid	(22-α)-hydroxy-campesterol	1.67869	0.675083	0.315647	-0.884548	-1.64226	1.07903	5.24073	-6.38749
a long-chain 3-oxoacyl-CoA	3-oxo-myristoyl-CoA	1.65793	0.604773	0	19.869	17.1109	0.15596	0.106339	0.106339
a small molecule	oripavine	1.63787	1.07011	0.396017	0.723956	0.671219	0.16818	1.53617	0.032523
an alkaloid	ecgonine methyl ester	1.62495	0.84352	0.205212	-0.0824823	0.390134	-0.205955	-4.06363	3.21429
a coumarin	scoparone	1.61531	0.305279	1.49377e-07	-13.1373	6.77041	-13.0537	-13.0093	-12.8868
a small molecule	adenosine 5'[b-γ-methylene]triphosphate	1.59913	0.677813	0.889774	-0.218884	-12.9876	-15.7946	-15.7358	-15.5584
a 3-[(ω-methylsulfanyl)alkyl]malate	3-[(6'-methylsulfanyl)hexyl]malate	1.59609	0.318678	6.07368e-05	8.04061	-11.2173	9.98969	10.0666	-10.9985
a small molecule	N2-acetyl-L-Lysine	1.57517	0.794206	0.644493	4.01847	5.88297	6.7718	-0.0961638	6.48784
a modified nucleotide	guanosine tetraphosphate	1.57134	0.735716	0	-0.26511	0.699126	-7.03659	-1.49647	-0.0104316
methylmalonyl-CoA	(R)-methylmalonyl-CoA	1.5703	1.0943	0	-0.00835228	18.4763	-0.0547301	8.7672	-0.00835228
a steroid	digitoxigenin 3-O-β-D-quinovoside	1.5695	0.280829	0	-3.7483	-3.95322	12.3681	12.033	10.054
a coenzyme A-activated compound	(8Z,11Z,14Z,17Z)-3-oxoicosatetraenoyl-CoA	1.56791	0.587523	0.490087	-4.31904	-19.8177	-19.8287	-19.7844	-19.6618
a ketocarotenoid // "a carboxylic ester"	bixin dimethyl ester	1.56325	0.940558	0.020895	0.352611	-0.0745761	1.5017	0.430436	0.29731
phenylpropanoids	apigenin 7-O-(6''-malonyl-β-D-glucoside) / pelargonidin-3-O-(6-O-malonyl-β-D-glucoside)	1.55005	1.00911	1.70012e-09	-6.30433	12.3512	-6.22071	-6.17638	13.5555
acyl-CoA oxoanions	3-oxoicosanoyl-CoA / 3R-hydroxy-(11Z)-eicos-11-enoyl-CoA	1.55	0.834743	4.29114e-07	-14.6711	6.60405	-14.5874	6.96485	-14.4205
a brassinosteroid	24-epi-campesterol	1.54747	0.779207	0.0960741	-0.254488	-0.908509	0.347649	-1.64783	0.656119
an amide	caffeoylserotonin	1.54576	0.584075	0.644643	8.06473	11.6266	11.4786	7.20507	7.06383
a medium-chain 2,3,4-saturated fatty acid // "a saturated fatty acid"	laurate	1.54332	0.814305	0.00874165	1.0936	0.212328	0.570073	0.269167	0.142205
a modified amino acid	L-willardiine	1.53494	1.00803	0.0178641	-14.2113	-10.6917	-14.1277	-14.0834	3.8377
a small molecule	dehydroascorbate (bicyclic form)	1.52582	0.410218	0.000753018	10.8553	-10.057	10.2418	10.1838	0.183917
3-amino-3-phenylpropanoyl-CoA	(3R)-3-amino-3-phenylpropanoyl-CoA	1.52376	1.0512	0	17.5061	-0.00835228	-0.00835228	-0.00835228	-0.00835228
a coenzyme A-activated compound	(2E,5Z)-tetradecenoyl-CoA	1.52166	1.16596	0.00961787	-11.1636	-11.0689	-11.08	-11.0357	-10.9131
a porphyrin	uroporphyrin I	1.51489	0.114433	0	0.703102	0.4173	-8.66151	-8.66151	-8.66151
a polyprenol phosphate // "an all-trans-isoprenoid phosphate"	all-trans-geranyl-geranyl monophosphate	1.5147	0.507929	0.000900506	0.0387115	-0.127637	0.557759	0.847241	-0.674286
an adenine-type cytokinin glucoside	kinetin-9-N-glucoside	1.5072	0.589528	0	-7.59542	-15.1087	-18.7892	-18.7892	4.05796
a sterol	4-α-formyl-ergosta-7,24(241)-dien-3-β-ol	1.50162	0.765922	0.762516	-2.02063	-3.46892	-4.58589	-0.202452	-1.42991
an alkaloid	pseudoephedrine	1.50029	0.972059	0.643586	-3.68405	-3.88265	-4.52775	1.70507	-3.58793
a small molecule	phenyllactatyl-CoA	1.49808	0.111455	6.88122e-40	0.127185	-0.133557	-17.4676	-17.4233	-17.3007
a coenzyme A-activated compound	indole-3-acetyl-CoA	1.49656	0.146769	6.88122e-40	0.132012	-0.329644	-17.7823	-17.7379	-17.6154
an aromatic aldehyde	3,4-dihydroxybenzaldehyde	1.49616	0.520838	0.135097	0.331966	0.00282478	-0.142399	0.0226288	-1.07031
a medium-chain (3R)-3-hydroxyacyl-CoA	(R)-3-hydroxyoctanoyl-CoA	1.49322	0.112733	0	0.0883513	-0.160252	-9.22917	-9.22917	-9.22917
adenine-type cytokinin glucosides	dihydrozeatin-O-glucoside; dihydrozeatin-7-N-glucose	1.49216	0.134756	0	-0.0477501	0.239897	-22.383	-26.3247	-1.48437
a flavonol derivative	quercetin 3-O-(3',6''-O-di-p-coumaroyl)-glucoside	1.49187	0.478671	9.50808e-05	-13.2477	6.84568	-13.164	-9.50692	-10.1868
aromatic monocarboxylates	3,5-dihydroxybenzoate / protocatechuate / gentisate	1.48981	0.997031	0.273586	0.171697	-0.0173508	1.00044	-11.7661	-2.24359
a nicotinamide mononucleotide	reduced -β-nicotinamide D-ribonucleotide	1.48791	1.0484	0.441607	-5.25979	5.14632	-3.2394	7.27068	7.18239
an L-polyhomomethionine	L-pentahomomethionine	1.4841	0.316804	0.0234116	-9.01483	8.46315	-16.9419	-4.33948	-4.53875
an alkaloid	celosianin II	1.48093	0.238598	0.913518	0.13195	-0.133236	-1.85341	-4.84444	-4.70704
a coenzyme A-activated compound	(2R,3S)-β-methylmalyl-CoA	1.48042	0.80879	0	18.4721	0.115322	0.190783	0.190783	0.190783
triterpenoids	11-deoxoglycyrrhetinate / ursolate / soyasapogenol E	1.4722	0.318552	0.00588833	0.43665	-0.0371224	-4.34887	-0.208355	-21.5109
a coenzyme A-activated compound	methylacrylyl-CoA	1.47138	0.602854	0	-0.38617	0.31165	0.347522	-0.0332546	-0.0880893
an isoflavone	dalcochinin-8'-O-β-glucoside	1.47078	0.708877	0.385239	0.579533	-0.219674	0.923763	2.42897	2.63838
a methyl farnesoate	methyl (2E,6E)-farnesoate	1.46813	0.591929	0	-11.8194	8.08729	-11.7357	-11.6914	-11.6894
an anthocyanin	cyanidin O-O-[6-O-(6-O-4-hydroxycinnamoyl-β-D-glucosyl)-2-O-β-γ-xylosyl-β-D-galactoside]	1.46791	0.363764	0.427337	0.0577819	-0.021766	-1.34289	-5.32733	-1.28537
a phenylpropanoid	t-anethole	1.46714	1.05799	0.426518	1.10818	0.21254	0.669037	2.30006	0.783092
an anthocyanidin-3-O--β-D-glucoside	cyanidin 3-O-(3'',6''-O-dimalonyl-β-glucopyranoside)	1.46641	0.983312	0.656615	0.1033	-16.2191	-16.1927	-16.1382	-9.95441
an alkaloid	celosianin I	1.46427	0.248105	8.76353e-06	0.0843029	-0.0036723	-1.41941	-1.60034	-1.52568
others	5,6-epoxy-3-hydroxy-9-apo-β-caroten-9-one / (-)-methyl jasmonate	1.46324	0.0905313	0	-0.00220871	0.158247	-12.4093	-12.4093	-24.5285
a small molecule	(2-hydroxyphenyl)acetate	1.46261	0.654096	0.00120396	9.47154	-6.49655	10.3165	13.806	-0.180795
diterpenoids	6β-hydroxy-syn-pimaradiene / ent-kaurenol / 7β-hydroxy-ent-sandaracopimaradiene / ent-sandaracopimaradien-3β-ol / 9β-stemod-13(17)-en-19-ol / ent-cassa-12,15-dien-3β-ol / taxa-4(20),11-dien-5α-ol / ent-cassa-12,15-dien-2β-ol / ent-11β-hydroxy-ent-cassa-12,15-diene / ent-isokauren-2α-ol / neoabietadienol / levopimaradienol / palustradienol / abieta-7,13-dien-18-ol / isopimara-7,15-dienol / ent-iso…	1.45795	0.655302	0.0341057	-22.7303	0.720427	-11.1826	-22.8066	-18.8431
monogalactosyldiacylglycerol-34:2	1-18:1-2-16:1-monogalactosyldiacylglycerol	1.45711	0.76683	0.509414	0.297178	-1.40402	-7.23777	1.13061	-9.74394
a sesquiterpenoid	3-hydroxylubimin	1.45669	0.319004	0.457591	0.356854	0.22812	-9.71435	-2.37788	-5.56446
a small molecule	ajmaline	1.45647	0.679473	0.753668	3.66434	4.61374	4.08989	5.14253	4.07477
a coenzyme A-activated compound	3-oxo-2-(cis-2'-pentenyl)-cyclopentane-1-(3-oxohexanoyl)-CoA	1.45277	0.91385	0.00947524	11.3708	0.0458263	0.0347776	0.0791092	0.201673
a long-chain trans-2,3-dehydroacyl-CoA	trans-arachido-2-enoyl-CoA	1.45194	0.886393	0.799084	1.6017	-4.27736	-9.05917	-4.44354	-0.204195
a coenzyme A-activated compound	succinyl-CoA	1.4508	1.27621	0	-0.048844	0.0458263	0.0347776	8.85671	0.0718133
a glycerate	2,3-diphospho-D-glycerate	1.45057	0.35983	0.677451	-0.0577288	-0.915858	-0.920784	-1.00413	-3.65165
flavonoids	calycosin 7-O-glucoside / wogonin 7-O-β-D-glucoside / biochanin A-7-O-glucoside	1.44864	0.506407	0.115071	-10.5576	10.7408	10.5263	10.1893	10.2281
monoterpenoids	(+)-carvone / (-)-carvone / 4-isopropylbenzyl alcohol / (4S)-perillyl aldehyde / (+)-menthofuran / safranal	1.44849	0.428997	0	7.10247	7.37793	6.65577	6.65577	7.77578
an hexasaccharide	ajugose	1.44834	0.348966	4.71755e-08	0.406067	0.00111485	-20.8527	-20.8083	-7.94835
others	luteolin 7-O-β-D-diglucuronide / 1,2,6-trikis-O-galloyl-β-D-glucose	1.44599	0.935766	0	2.77402	-14.991	-14.8931	-14.8931	-14.8931
a lignan	(+)-secoisolariciresinol monoglucoside	1.44361	0.781166	0.601788	1.25689	0.140165	0.514548	0.421752	-3.9324
an isoflavone // "a 4'-hydroxyisoflavone"	genistein	1.4432	1.08912	0.55778	-2.10188	-4.84396	-10.3733	1.2406	1.27248
phenylpropanoids	arabidopate / iso-arabidopate	1.44309	0.437972	0.655581	0.563347	-0.0809291	-0.315872	-0.794341	-0.760855
others	emodin / apigenin / pelargonidin	1.44263	1.09026	0.168121	-11.3293	-4.84396	-10.3733	1.2406	1.27248
a 2-oxo carboxylate	β-methylenecyclopropyl pyruvate	1.44259	0.726111	0.526305	0.107261	0.00326633	-0.112713	0.149809	-4.58823
a 9-apo-carotenone	3-hydroxy-β-ionone	1.44212	0.830028	0.648071	9.01582	10.0206	7.23397	3.52023	2.63203
a small molecule	preuroporphyrinogen	1.43982	0.385023	0.00225695	0.132804	0.0450815	-1.13882	-1.42467	-1.35891
a linear malto-oligosaccharide	maltohexaose	1.43691	0.444682	0.784281	0.406067	0.00111485	-1.16661	-1.99766	-4.94299
a brassinosteroid	26-hydroxybrassinolide	1.43575	0.882928	0.319552	0.0737403	0.105344	0.607263	-0.709492	0.375868
brassinosteroid	24-epibrassinolide /brassinolide	1.43316	0.880665	0.000557047	-22.0708	-11.1706	-21.9871	-18.5744	-18.2912
a small molecule	N-methylaminobutanal	1.43129	0.54724	0.117862	13.8227	-7.18521	-7.19626	-3.93046	-7.02937
a coenzyme A-activated compound	3-oxo-2-(cis-2'-pentenyl)-cyclopentane-1-butanoyl-CoA	1.43117	0.141945	9.58443e-32	0.019969	0.282175	-17.1502	-17.1059	-16.9833
sterols	campest-5-en-3-one / 24-methylenecholesterol / 24-methyldesmosterol / brassicasterol / 4α-methyl-5α-cholesta-7,24-dien-3β-ol / 4α-methyl-5α-cholest-7-en-3-one / 4α-methyl-5α-cholesta-8,24-dien-3β-ol / ergosta-5,7-dienol / ergosta-7,25(27)-dienol / ergosta-8,25(27)-dienol / episterol	1.42963	0.613529	0.307969	-5.59922	7.92813	-3.80634	-16.425	-16.3024
a 3-β-hydroxysteroid	crinosterol	1.42822	0.626425	0.314339	-5.59922	7.92814	-3.80634	-16.425	-11.834
a small molecule	(5Z,8Z,11Z,14Z,17Z)-3-oxodocosapentaenoyl-CoA	1.42805	0.605838	0.00658259	5.42817	-8.76685	1.30554	1.10889	-14.2497
a 3-β-hydroxysteroid	4α-formyl-4β-methyl-5α-cholesta-8,24-dien-3β-ol	1.42801	0.824566	0.999983	1.83257	-2.90034	-4.62394	3.65075	2.42329
deoxyribonucleoside 5'-monophosphate	3'-deoxyadenosine 5'-monophosphate / dAMP	1.42724	0.472021	0.00055915	8.57982	8.38138	-16.0355	-15.9911	-15.8686
an acyl-CoA	ω-carboxy-(9Z)-octadec-9-enoyl-CoA	1.42594	0.354386	0.886257	4.02502	-10.0316	-9.97279	-13.3261	-16.3472
an anthocyanidin-3-O--β-D-glucoside	delphinidin 3-O-rutinoside-7-O-(6-O-(p-hydroxybenzoyl)-glucoside)	1.4259	0.445283	0.00107801	-12.5334	5.70552	-6.95135	-12.4054	-12.3123
a small molecule	(1R)-trans-chrysanthemate	1.42492	0.211914	0	0.134928	-0.146553	3.48543	3.48543	3.87112
a small molecule	phloroglucinol	1.42462	0.332733	0.0418961	-3.99803	0.0234175	14.3635	18.9642	1.0717
a purine ribonucleoside	xanthosine	1.42018	0.518838	0.697653	-3.48528	0.0268043	-2.03462	2.6459	2.18415
an (E)-1-(L-cysteinylglycin-S-yl)-N-hydroxy-ω-(methylsulfanyl)alkan-1-imine	(E)-1-(L-cysteinylglycin-S-yl)-N-hydroxy-ω-(methylsulfanyl)butan-1-imine	1.41973	0.604533	0.430591	4.64664	4.37805	2.04397	-1.58355	2.15258
a small molecule	(-)-medicarpin-3-O-glucoside	1.41896	0.185589	2.53496e-06	-0.143626	-0.0784966	-1.58348	-2.26106	-1.40489
an aldehyde or ketone	4-hydroxy-5-methyl-2-methylene-3(2H)-furanone	1.41766	0.333743	0.334199	-4.17003	-0.529111	-1.30634	3.29435	-6.90314
a flavonol derivative	eupatolin	1.41734	0.256404	0.14991	-0.0236187	0.150643	-1.73918	-0.954873	-1.97745
long-chain 2,3,4-saturated fatty acids	icosatetraenoate / arachidonate	1.4169	0.56198	0.00105404	-21.5642	-7.28938	-14.2698	-21.4362	-21.3137
an organic cation // "a quaternary amine"	cetyltrimethylammonium	1.41369	0.456137	0.00012761	1.32659	0.210368	1.2429	1.38388	1.36776
a quinone	deoxyshikonin	1.4129	0.693789	0.0607935	8.2984	0.178399	-6.59235	-6.54802	8.56715
a lignan	(-)-yatein	1.41058	0.351269	0.532426	0.0444005	0.312927	-4.52346	-0.797214	-1.07635
an (E)-S-glucosyl-N-hydroxy-ω-(methylsulfanyl)alkimidothioate	7-(methylsulfanyl)heptyl-desulfoglucosinolate	1.40938	0.342386	0.00253487	0.00750446	0.300711	-0.962679	-0.689166	-1.01327
a porphyrin	uroporphyrinogen-I	1.40926	0.437019	0.27435	0.260208	0.205962	-3.55816	-6.7336	-18.408
a phenylpropanoid	pseudoisoeugenol	1.40867	0.559155	0.583899	-4.59088	-2.31784	-1.93839	0.150333	-0.855263
a small molecule	4-methylumbelliferone 6'-O-malonylglucoside	1.40805	0.741654	0.273586	3.7396	3.45923	3.307	-3.53924	3.54773
a 1-(methylsulfanyl)-n-aci-nitroalkane	1-(methylsulfanyl)-8-aci-nitrooctane	1.40738	0.921606	1.49377e-07	-13.7322	7.14684	-13.6486	-13.6043	-13.4817
an aromatic compound	methylchavicol	1.40702	0.839322	0.631678	4.71182	-14.7116	-14.7226	-14.6783	-11.0475
a small molecule	deacetoxyvindoline	1.40687	0.640442	0.610872	0.866913	0.0142867	0.215177	-0.00484212	-4.06175
a positively-charged polar amino acid // "a proteinogenic amino acid" // "a basic amino acid" // "an L-lysine or meso-2,6-diaminoheptanedioate" // "an L-amino acid"	L-lysine	1.4068	0.563321	0.869167	-4.33211	-4.73628	1.87044	-1.3065	1.58983
a small molecule	4-(2'-carboxyphenyl)-4-oxobutyryl-CoA	1.4061	0.60922	0	4.5636	0.0172272	-16.2701	-16.2701	-16.2701
a flavone	isovitexin-7-O-xyloside	1.40523	0.612713	8.34354e-05	-14.8871	3.7593	-14.8035	-14.7591	-14.6366
a gibberellin	gibberellin A19	1.40475	0.442928	0.410004	0.320718	0.486322	-10.2243	-2.50258	-13.6064
xanthines	3-methylxanthine / 1-methylxanthine	1.40151	0.341643	2.81979e-06	-0.464729	-0.181745	-23.8479	-23.8036	-16.0047
a hydroxy-L-amino acid	3-hydroxy-L-kynurenine	1.40086	0.464648	0.00635287	1.15076	1.2736	2.0609	-13.8947	0.331923
brassinosteroids	campest-4-en-3β-ol / campesterol / (5α)-campestan-3-one / ergost-7-enol	1.40069	0.380132	0.0155782	-16.2047	7.19063	8.44679	6.45131	-3.53296
flavonoids	(+)-gallocatechin / (2R,3S,4S)-leucocyanidin	1.39894	0.519748	0.00025283	-17.0871	4.00882	-17.0035	-16.9591	-1.25632
a flavin electron carrier // "an oxidized flavin"	FAD	1.39803	0.574754	0.46651	-0.0335519	-0.325723	-0.44067	-0.932442	-0.312469
a 1-palmitoyl-2-acyl-sn-glycero-3-phosphocholine	1-palmitoyl-2-vernoloyl-phosphatidylcholine	1.39618	0.608929	0.408737	-3.42625	-2.10184	-11.8595	-3.09168	-12.4967
a chloroaromatic compound	pentachlorophenol	1.396	0.582085	0.556516	0.176488	-0.935133	-1.23562	-1.24554	-0.638067
a medium-chain primary alcohol	1-dodecanol	1.39519	0.561659	0.875549	-1.43624	-0.729404	0.945508	-0.114517	2.16064
3-hydroxytetracosanoyl-CoA // "a very-long-chain (3R)-3-hydroxyacyl-CoA"	(3R)-3-hydroxylignoceroyl-CoA	1.39512	0.912844	0.0737453	10.7404	3.79371	9.97382	6.73945	9.84466
a small molecule	12-hydroxydihydrochelirubine	1.3949	0.171475	0.00365478	16.6015	-1.4651	17.8281	17.996	8.76395
a gibberellin	gibberellin A98	1.39471	0.993466	0.884242	0.0789242	0.0958598	-0.120093	-5.21137	-8.65398
a small molecule	1,2-di-S-octyl-1,2-dimercapto-3-propanol	1.39373	0.645675	0.781915	5.08865	3.77558	1.1139	4.97031	-3.85483
a hydroxylated carboxylate	L-threonate	1.39027	0.92777	0.856979	-2.9284	-0.868807	-0.888432	-1.33595	-1.34326
a small molecule	oxamate	1.39025	0.684075			#N/A	#N/A	#N/A	#N/A
a hydrolyzable tannin	1-O,6-O-digalloyl-β-D-glucose	1.39016	0.171648	0.000329541	0.176188	0.342504	1.49687	1.33106	1.50436
a small molecule	α-D-galacturonate 1-phosphate	1.38987	0.505705	0.0495082	7.8437	-4.67752	10.4963	14.2049	14.5451
an amide	4-coumaroyl-3-hydroxyagmatine	1.38921	0.443772	0.408737	-7.18309	-0.151923	0.173325	-2.17595	-7.20165
a bile acid	deoxycholate	1.38904	0.601558	0.583676	0.288176	-3.93253	0.769037	0.130952	1.09533
a 12'-apo-carotenal	5,6-epoxy-3-hydroxy-12'-apo-β-caroten-12'-al	1.38877	0.650817	0	0.0338767	18.2912	-3.58873	-3.58873	15.6907
a methyl ketone	2-tridecanone	1.38788	0.421842	0.5729	0.675594	1.80428	6.42557	5.71947	0.523414
others	phenylethyl acetate / propyl benzoate / isoeugenol / eugenol / 4-hydroxyphenylbutan-2-one	1.38637	0.406809	0	-4.59088	-17.7169	-26.4032	-26.3589	-26.2599
a small molecule	(R)-pantothenate	1.38423	0.523701	0.0113248	-4.08608	5.6567	-14.4985	-10.6146	0.792114
a chlorin	pheophorbide a	1.3842	1.38629	0.240403	-1.42284	-4.76433	-1.08345	1.12558	-9.13393
a radical	monodehydroascorbate radical	1.38375	0.172612	0.111325	3.43879	-3.18621	10.3753	17.3462	17.1901
a long-chain 2,3,4-saturated fatty acid // "a ω-6 fatty acid"	linoleate	1.38276	1.098	0.472738	-3.90274	0.719206	0.646388	1.43127	-3.54914
a diterpenoid	rebaudioside A	1.38076	1.03606	0.0541073	0.325249	-17.4798	-2.432	-9.01713	-11.4902
isoquinoline alkaloids	codeinone / neopinone	1.37967	0.793338	0	-3.18685	-21.1138	-21.1138	-21.1138	-21.1138
a long-chain acyl-CoA	(7Z,10Z,13Z,16Z,19Z)-docosapentaenoyl-CoA	1.37959	0.660507	0.975715	4.56907	-6.30494	-11.999	-4.32039	-11.4412
sesquiterpenoids	8β-hydroxy-germacra-1(10),4,11(13)-trien-12-oate / zealexin A2 / zealexin A3	1.3789	0.574345	0.370383	-16.8033	4.11773	7.02103	-4.78196	-4.81177
a medium-chain oxoacyl-CoA	3-oxooctanoyl-CoA	1.37788	0.808742
others	robustaquinone D / 7,2'-dihydroxy-4',5'-methylenedioxyisoflav-3-ene / 7,4'-dihydroxy, 8-methoxyflavone / genkwanin / calycosin / prunetin 7 wogonin / (-)-maackiain / 2-hydroxyformononetin / (+)-maackiain	1.37602	0.224923	0.00012761	0.365461	0.249537	2.38223	2.46944	2.30571
a glycosyl ester // "a glucoside"	β-D-glucosyl crocetin	1.37526	0.89922	0.657973	-0.272346	-7.75313	0.666079	-12.0053	-4.32357
a coumarin	ayapin	1.37484	0.295259	2.81979e-06	-0.152098	0.233143	2.24448	2.33446	2.201
isoflavonoids	7,2,2'-trihydroxy-4',5'-methylenedioxyisoflav-3-ene / (3R,4R)-3-(6-hydroxy-1,3-benzodioxol-5-yl)-3,4-dihydro-2H-chromene-4,7-diol / carthamidin-7-methyl ether	1.37418	0.235724	0.000141235	0.360184	0.251715	2.37943	2.45522	2.30056
a flavone	isovitexin 2''-O-arabinoside	1.37377	0.450385	0.00089493	-0.0506732	0.220609	-17.3752	-20.5103	-13.6611
an indole derivative	2-oxoindole-3-acetate	1.37265	0.25115	0.488268	3.27022	3.65052	5.67566	5.7676	5.63972
monogalactosyldiacylglycerol-34:3	1-18:1-2-16:2-monogalactosyldiacylglycerol / 1-18:3-2-16:0-monogalactosyldiacylglycerol	1.37247	0.513953	0.112365	-5.40339	1.61494	-1.44915	13.6453	-9.23805
phosphatidylcholine-36:3	1-oleoyl-2-linoleoyl-phosphatidylcholine	1.37222	0.997546	0.620179	-7.09482	-6.95996	-0.761485	-1.85017	-0.389932
a small molecule	cycloheptadienyl	1.37157	2.27813	0.767473	-3.42779	0.311719	-0.164739	-1.71968	-2.92543
a nitrile // "a -β-D glucoside"	linustatin	1.37114	0.434071	0.806249	0.576196	-0.21972	-1.19824	-8.84738	-5.60115
a peptidyl nucleoside	puromycin	1.37031	0.448887	0.615789	-5.09927	-0.605819	-0.0172062	-1.32062	-0.044639
others	(+)-6α-hydroxymaackiain / robustaquinone C / 1,6,8-trihydroxy-7-methoxy-2-methylanthraquinone / 1,7,8-trihydroxy-6-methoxy-2-methylanthraquinone / 1,5,7-trihydroxy-6-methoxy-2-methylanthraquinone / 3-O-methylkaempferol / (3R)-sophorol	1.37007	0.623712	0	-6.55969	-6.63638	1.42781	4.83917	-12.6969
monoterpenols	(S)-(-)-citronellol / (+)-neomenthol / (+)-isomenthol / (+)-neoisomenthol	1.36992	0.53078	0.101075	-9.90566	6.15719	10.1214	6.94146	-3.16236
a cyclic terpene ketone	hyperforin	1.36991	0.681955	0.841293	-0.687373	1.99572	-0.191683	-1.4439	-2.65554
an ω-hydroxy long-chain fatty acid	16-hydroxypalmitate	1.36791	0.910362	0.8103	-2.0438	-3.58906	-0.454451	-0.267612	-1.51069
a small molecule	diphosphoglycolyl proline	1.36746	0.977051	0.648751	0.20837	1.52212	3.02759	-0.647746	0.421737
a coenzyme A-activated compounds	(2R)-ethylmalonyl-CoA / (2S)-ethylmalonyl-CoA / glutaryl-CoA	1.36738	0.46758	0	3.59199	4.11471	4.07225	-5.10709	-4.98108
a coenzyme A-activated compound	3-oxo-2-(cis-2'-pentenyl)-cyclopentane-1-(3-oxobutanoyl)-CoA	1.36717	0.216927	4.45839e-07	-2.74388	0.32	-17.0928	-17.0484	-16.9259
a small molecule	(S)-cis-N-methylstylopine	1.36671	0.868041	0.10598	-4.09013	-3.99546	12.4683	0.141374	-3.83961
flavonoids	2,5,7-trihydroxy-4'-methoxyisoflavanone / peonidin / (2S)-hesperetin	1.36467	0.694367	0	-3.30295	-6.73557	4.66989	8.15378	-9.73548
monoterpenoids	3β-hydroxy-β-cyclocitral / (6E)-8-hydroxygeranial	1.36388	0.529891	0.00316774	-4.51919	8.96054	-16.6248	-16.5804	-8.95868
a C-methylated amino acid	2-methylaspartate	1.3629	1.36255	0.263004	6.66451	3.34741	8.45632	6.7445	7.28036
a small molecule	2-amino-3-carboxymuconate-6-semialdehyde	1.36227	0.149316	0.273586	0.101413	-0.0898162	-14.0525	-7.82504	-13.1821
an all-trans-polyisoprenyl diphosphate	decaprenyl diphosphate	1.36217	0.642439	0.831997	9.65218	4.32718	1.06347	10.6513	1.11903
an indole-phytoalexin // "a glutathione-S-conjugate"	indol-3-ylmethyl-glutathione	1.36205	2.28085	0.840156	-0.127926	-3.66881	0.197844	-2.0626	0.189682
a monoterpenol	(6E)-8-oxogeraniol	1.36153	0.526565	0.678823	7.42526	8.96055	7.07544	7.80257	-1.27884
a polyprenol group	mono-trans, poly-cis-decaprenyl group	1.36151	0.975289	0	0.1853	5.56662	7.97794	24.335	21.5934
a C-nitro compound // "an aromatic compound"	2-amino-4,6-dinitrotoluene	1.36133	1.04505	0.188008	-10.5439	-10.5567	-13.9525	-13.9081	0.163186
a small molecule	3-β-D-galactosyl-sn-glycerol	1.35989	1.02827	0.201614	1.31083	0.017966	1.20401	-6.51263	1.60868
a medium-chain (3S)-3-hydroxyacyl-CoA	(S)-3-hydroxyhexanoyl-CoA	1.35939	0.405829	0.36769	0.838659	1.53277	1.82655	1.37868	1.85526
a 2-[(ω-methylsulfanyl)alkyl]malate	2-[(6'-methylsulfanyl)hexyl]malate	1.35884	0.237742	0.430591	0.181098	-3.46869	2.13018	2.20708	1.94863
1-(3-sn-phosphatidyl)-sn-glycerol 3-phosphate	phosphatidylglycerophosphate (1-octadecenoyl(9Z), 2-palmitoyl)	1.35739	0.924784	0.572694	1.06774	-0.0851355	-8.1722	-1.40267	-5.58229
a modified nucleotide	ppGpp	1.35592	0.287513	0.00128919	0.881488	0.621807	-0.173965	-1.57379	-0.0877511
an anthocyanidin-3-O--β-D-glucoside	cyanidin 3-O-glucoside-7-O-(6-O-(4-O-(glucosyl)-oxybenzoyl)-glucoside)	1.35576	0.399876	0.212709	-0.355349	-0.533663	-7.41593	-10.0218	-1.29977
an (L-cysteinylglycine)-S-conjugate // "a nitrile"	(L-cysteinylglycin-S-yl)(1H-indol-3-yl)acetonitrile	1.35516	0.319132	0.00124343	-0.32532	-0.496279	2.24704	2.09914	2.16545
a coenzyme A-activated compound	3-oxo-2-(cis-2'-pentenyl)-cyclopentane-1-(E-octa-2-enoyl)-CoA	1.35482	0.330715	0.657973	4.01232	-11.8805	-12.6348	-7.21426	-16.5601
a medium-chain 2,3,4-saturated fatty acyl CoA	octanoyl-CoA	1.35379	0.195252	0.644643	3.19041	3.2482	-2.58486	-4.14543	-1.57151
a rotenoid	rotenolone	1.3537	0.421556	0.115063	0.189334	-0.111254	-0.976011	-1.42964	-1.42586
an -α,ω-dicarboxylate	suberate	1.35268	0.442772	0.999983	3.87358	10.8853	7.1689	11.2822	7.36552
others	methyl gibberellin A34 / gibberellin A97 / gibberellin A37 / (-)-secoisolariciresinol / (+)-secoisolariciresinol	1.35261	0.91936	0.117638	1.36245	-6.99919	14.785	10.1699	5.253
a 3-oxo-&Delta4-steroid // "a brassinosteroid"	campest-4-en-3-one	1.35212	0.332674	0.370383	-5.73264	-0.350986	0.805297	-2.55079	-8.35059
a small molecule	oleanolate 3-β-D-glucuronoside-(3,1)-galactoside-28-glucoside	1.34998	2.31672	0.988385	0.7663	-3.14131	-6.09832	1.80727	0.129457
a 4-hydroxy-3-polyprenylbenzoate	3-nonaprenyl-4-hydroxybenzoate	1.34905	0.852036	0.489105	-7.5839	-10.2503	-3.9793	-2.89971	-6.26667
a proteinogenic amino acid // "a non-polar amino acid" // "a neutral amino acid" // "an L-amino acid"	L-proline	1.34822	0.46058	0.0496106	7.79246	-0.724714	-11.0002	-7.41527	7.87399
an apocarotenoid // "a ketone"	13-apo-β-carotenone	1.3481	0.605217	0.779408	0.580911	-0.00483191	-1.44601	2.66187	-2.11424
a small molecule	2-hydroxy-3-carboxy-4,5-cyclopropylhex-5-enoate	1.34596	0.588845	0.613098	3.63291	2.88747	3.5516	3.98259	-0.185521
a cyclic peptide // "an antibiotic"	aureobasidin A	1.34558	0.512602	0.276358	8.88537	3.84735	6.10437	6.11597	7.07412
an L-cysteine-S-conjugate	(E)-1-(L-cystein-S-yl)-N-hydroxy-ω-(methylsulfanyl)heptan-1-imine	1.34483	0.981616	0.599062	3.45014	3.54268	8.85375	7.77151	4.4488
others	hemigossypolone-6-methyl ether / 7,2'-dihydroxy-4'-methoxy-isoflavanol carbocation intermediate 1 / 7,2'-dihydroxy-4'-methoxy-isoflavanol-quinonemethide-intermediate-2	1.34468	1.22398	0.0107137	6.75432	-3.36932	-6.71609	-6.67176	13.0314
a small molecule	phenylarsenious oxide	1.34441	0.575298	0	-5.85412	-15.0946	-15.0481	-15.0481	-15.0481
a modified nucleotide	adenylo-succinate	1.34378	0.983368	0.63197	3.15931	5.10594	4.92942	4.71968	5.25593
an anthocyanin	cyanidin 3-O-[2''-O-(xylosyl)-6"-O-(p-coumaroyl) glucoside] 5-O-malonylglucoside	1.34364	0.213095	7.18536e-05	2.99863	2.78448	-14.1186	-14.0743	-13.9517
a 6-methoxy-3-methyl-2-all-trans-polyprenyl-1,4-benzoquinol	6-methoxy-3-methyl-2-all-trans-nonaprenyl-1,4-benzoquinol	1.34318	0.635243	0.644643	2.54879	2.4984	3.83953	-6.19036	-0.571158
a monoterpenoid	iridotrial	1.34201	0.409989	0.117638	-0.0319977	-13.2325	-26.4007	-26.3564	-26.2338
a flavonol 3-O -β-D-glucosyl-(1->2)-β-D-glucoside	kaempferol 3-O-β-D-glucosyl-(1->2)-β-D-glucoside	1.34167	0.407978	0.482014	-2.70358	0.683582	1.4576	1.92679	-2.50225
a small molecule	gentiodelphin	1.34133	0.718901	0.000829842	-0.0286601	0.0660102	18.5844	15.5807	6.10501
a small molecule	5-(methylsulfanyl)-2,3-dioxopentyl 1-phosphate	1.34042	0.368518	0.639604	0.122148	-0.493272	-0.677037	-0.423362	-0.13609
a small molecule	D-erythro-imidazole-glycerol-phosphate	1.34021	0.245651	0.41108	-0.684536	-0.428214	-0.738661	-1.16401	-1.2887
a small molecule	isovalerate	1.33956	1.11131	0.572487	0.133279	-8.67999	1.5482	-13.4117	-4.49979
a myo-inositol tetrakisphosphate	D-myo-inositol (1,3,4,6)-tetrakisphosphate	1.33949	0.526748	0.739052	-0.0601444	13.5833	17.5262	17.194	18.1987
a nitrile	(R)-prunasin	1.33943	0.878122	0.273586	4.64748	-4.09331	12.8635	-3.42087	-0.511635
a hydroxyacyl-CoA	10,16-dihydroxypalmitoyl-CoA	1.33891	0.577495	0.821015	4.72367	2.69887	-6.60409	2.41766	-0.807536
a 3-(aryl)acrylate // "a phenylpropanoid"	cinnamate	1.33856	0.74877	0.770975	-3.76097	-3.59659	-2.39056	-6.71346	0.840847
a pyrimidine	5-mercaptodeoxyuridine	1.33814	0.480829	0.505332	0.407303	-0.0263287	-0.668333	-0.700094	-0.651717
a coenzyme A-activated compound	acetyl-CoA	1.33809	0.944122	0.999983	-0.038586	19.2976	18.6881	6.71975	6.08141
an L-N-hydroxypolyhomomethionine	N-hydroxyhomomethionine	1.33717	0.825255	0	-18.7873	-18.8854	-1.79896	-15.5482	-8.37771
a pterin	7,8-dihydromonapterin	1.33706	1.25878	0.435887	3.84244	-6.78574	3.65933	-10.146	-0.0997677
an S-alkyl-L-cysteine S-oxide // "an organosulfur compound"	alliin	1.33431	0.454442	0.0948653	-1.50086	-6.39635	13.4184	9.84634	12.8366
a small molecule	tropinone	1.33342	0.41305	0.673775	4.33818	5.01245	-7.71234	3.20632	-5.04784
a coenzyme A-activated compound	stearidonoyl-CoA	1.33326	1.27152	0.00225695	15.5562	0.126592	0.109994	0.154325	0.291271
a coenzyme A-activated compound	2-methylfumaryl-CoA	1.33324	0.633693	0.109957	-12.7201	3.43164	6.36367	6.19446	3.05025
an anthocyanin	ternatin C3	1.33301	0.33397	0.00137794	-2.58691	-2.76394	-17.0521	-17.0078	-16.8852
a small molecule	3-epoxy-16-methoxy-2,3-dihydrotabersonine	1.33296	0.174265	0	-0.238964	0.185447	-0.907296	-0.649311	-24.0364
a long-chain 2,3,4-saturated fatty acid // "a saturated fatty acid"	myristate	1.33132	0.81057	0.480083	1.37518	-0.348877	-0.404891	-0.51526	-0.856591
a small molecule	N4-aminocytidine	1.33118	1.06163	0.275654	2.76042	-10.3551	-3.92524	-13.9391	1.11551
a small molecule	polyneuridine aldehyde	1.33078	0.814005	0.318621	11.9215	-7.77242	-4.17333	-4.10781	-7.61658
a small molecule	ADT	1.33069	0.908545	0.306001	-6.35135	-3.60259	2.27916	0.765949	-6.44305
an anthocyanin	ternatin C5	1.32987	0.443719	0.856979	-0.0278889	-0.0147174	-3.7721	-9.4325	-12.0475
a toxin // "a lignan"	6-methoxypodophyllotoxin	1.32807	0.552486	0.60454	-4.13915	0.112516	-2.75143	-5.17627	-2.92024
a benzoate	1-O-4-hydroxybenzoyl-β-D-glucose	1.3264	1.12427	0.00739035	-0.139853	-6.70271	8.35007	8.49656	-9.86607
carbohydrates	D-glucono-1,5-lactone / L-gulono-1,4-lactone / L-galactono-1,4-lactone / 3-keto-β-D-galactose / L-sorbosone 1,4-lactone / L-sorbosone 2,6-lactone	1.32594	0.325785	0.00961787	-0.13447	0.229266	-19.981	-9.74498	-16.5407
a medium-chain 2,3,4-saturated fatty acyl CoA	decanoyl-CoA	1.32548	0.277059	6.85273e-05	-9.11803	2.85869	-15.0183	-14.974	-14.8514
others	caffeoyl-4'-hydroxyphenyllactate / 3',4',5'-O-trimethyltricetin	1.32546	0.544515	0.604863	-7.74562	9.07327	12.3871	4.97121	0.084487
an anthocyanin	cyanidin O-O-[6-O-(6-O-sinapoyl-β-D-glucosyl)-2-O-β-D-xylosyl-β-D-galactoside]	1.32523	0.928405	0.689622	0.132234	0.470402	-1.17277	-8.79569	-3.66278
a small molecule	11-hydroxyvittatine	1.32396	0.625937	0.00107801	19.1598	-3.95467	14.0255	13.4044	11.9135
a small molecule	porphobilinogen	1.32345	0.922617	0.519913	0.22687	-0.00817808	0.340267	-10.6352	-3.31381
an organobromine compound	bromohydrin of isopentenyl pyrophosphate	1.32245	0.850564	0.526305	0.287653	3.57138	3.42758	-10.781	-2.62083
a small molecule	(3R,5Z,8Z,11Z,14Z,17Z)-3-hydroxydocosapentaenoyl-CoA	1.32168	0.845336	0.672246	-0.591713	1.14613	-3.9578	-6.56395	-3.49506
an ubiquinol	ubiquinol-9	1.32135	0.885556	0.682022	0.829325	-5.08707	-0.855596	-5.77855	-7.23259
a ureido compound	(S)-2-oxo-4-hydroxy-4-carboxy-5-ureidoimidazoline	1.32104	0.306476	0.669074	3.44486	3.22028	0.744769	1.33677	1.70569
an anthocyanidin 3,5-di-O-β-D-glucoside	shisonin	1.3204	0.595987	0.0211534	-13.0319	6.67409	-1.00455	5.01861	5.02774
|Aliphatic-Omega-Amino-Aldehydes|	4-aminobutanal	1.31973	0.349059	0.543493	-0.0793282	-0.110393	-2.11831	-1.67158	-6.89892
a small molecule	4-[(4E,6E)-3-oxo-7-phenylhepta-4,6-dien-1-yl]cyclohexa-3,5-diene-1,2-dione	1.31934	0.56091	0.999983	3.9846	4.08069	1.21826	-11.5761	-15.9475
a pteroate	dihydroisopteroate	1.31933	0.321707	0.344246	-10.0965	10.3435	-3.13292	-3.23577	-9.82552
an alkaloid	(13S,14R)-13-O-acetyl-1-hydroxy-N-methylcanadine	1.31844	0.637099	0.0862434	-0.0200434	-0.156705	-0.212697	-0.198473	-13.6693
a small molecule	narirutin	1.31808	0.745526	0	-5.78419	2.02712	-1.98376	1.45208	-12.45
a small molecule	homoeriodictyol	1.31767	0.342197	0.136987	-10.3074	-0.297066	1.5219	1.69268	1.23216
a coenzyme A-activated compound	3-oxo-2-(cis-2'-pentenyl)-cyclopentane-1-(3-oxooctanoyl)-CoA	1.31752	1.2056	0.294675	-18.5483	2.36519	-1.13884	1.72104	-18.4055
a polyketide	aloenin	1.31695	0.64562	0.0330247	0.412495	0.544923	-0.038154	-0.0440938	0.253999
a flavonol derivative	3,7,4'-trimethylquercetin 2'-O-β-D-glucoside	1.31635	0.423569	0.895887	0.33185	0.183966	-3.24244	-13.2738	-16.5241
alkaloids	vellosimine / cinchonidinone / cinchoninone	1.31584	1.13116	0	-6.97456	-3.54374	-13.6011	-13.6011	4.65545
an L-cysteine-S-conjugate	(E)-1-(L-cystein-S-yl)-N-hydroxy-ω-(methylsulfanyl)octan-1-imine	1.31453	0.307736	0.260483	0.0958068	0.788169	-8.17472	-1.31261	-0.719328
a small molecule	macarpine	1.3143	0.776677	0.313597	2.03227	3.21116	3.73967	3.64957	0.108703
a thiazole	2-(2-carboxy-4-methylthiazol-5-yl)ethyl phosphate	1.31303	0.602399	0.405197	-3.42412	-3.34736	-11.8066	-11.3924	-6.29259
an alkaloid	cinchonidine	1.31251	0.887596	0.697773	-1.16887	-0.568034	-3.27892	2.50174	1.80891
a phytosphingosine	phytosphingosine (C18)	1.31234	0.590823	0.27435	1.04541	0.0747687	0.0469252	0.284996	-0.0850716
others	17-O-acetylajmaline / biotin	1.31228	0.455338	0.648071	0.0258942	-0.100934	-1.16234	-0.873873	-4.95354
brassinosteroids	6-deoxo-24-epicathasterone / (6α)-hydroxycampestanol / 3-epi-6-deoxocathasterone	1.31082	1.83217	0.114179	-13.2864	3.58182	7.68735	-1.84626	-9.6982
xanthophylls	9'-cis-neoxanthin / capsorubin / 9-cis-violaxanthin / trans-neoxanthin / 4,4-dihydroxyzeaxanthin	1.31077	0.357351	0.0107137	-18.3674	-8.86577	6.04753	1.46358	-18.0148
a flavone	baicalein	1.31034	0.2462	0.00688279	0.0377798	-0.0632102	1.74836	1.6387	1.69816
a fatty-acyl adenylate ester	(propanoyl)adenylate	1.31012	0.579372	0.675303	-1.0562	-1.17089	-0.939295	-0.132957	0.315173
a C-nitro compound	tolcapone	1.30998	1.36974	0.770975	-1.71034	-2.60027	-5.58491	-5.69437	-4.28487
a phytosiderophore	3-epihydroxy-2'-deoxymugineate	1.30996	0.527985	0.129549	-8.25319	-3.62298	-7.70708	-3.14122	-20.8248
an indole derivative // "a modified amino acid"	N-(β-D-glucosyl)-(indol-3-yl)acetyl-L-glutamate	1.30974	0.954245	0.870778	-1.32622	-8.82979	-5.65481	-2.16201	-2.35062
a small molecule	2-isopropylmaleate	1.30856	0.69958	0.985294	0.348361	-0.542289	0.67714	-6.08939	-5.91597
|Unclassified-Compounds|	pyrroline 5-carboxylate	1.30811	0.731537	0.849973	-0.048844	0.0458263	0.0347776	0.0791092	0.182376
nucleotides	2'-deoxyguanosine 3'-monophosphate / AMP group / vidarabine phosphate / adenosine 2'-monophosphate / adenosine 3'-monophosphate / 3'-azido-3'-deoxythymidine 5'-phosphate / AMP / dGMP	1.30766	0.261697	0.365622	0.119696	-4.00165	1.55917	1.70357	1.42136
an aldehyde	(3Z,6Z)-nonadienal	1.30747	0.404219	0.357485	-4.26766	-7.54079	0.216168	0.0900205	-3.66433
an alkaloid	narcotine hemiacetal	1.30722	0.870927	0.943706	-7.29756	-7.24036	-2.8485	-18.435	-14.9508
a long-chain 2,3,4-saturated fatty acid // "a ω-3 fatty acid"	(5Z,8Z,11Z,14Z,17Z)-icosapentaenoate	1.30676	0.87629	0.60454	0.705378	0.922121	0.784599	1.66951	-2.9985
a small molecule	galanthamine	1.30665	0.723922	0.800681	-2.81972	6.64096	3.93371	5.37231	3.43753
a small molecule	p-coumaroyltriacetate	1.30633	0.23598	0.00775207	0.0438604	-0.0425186	1.74904	1.64079	1.68426
a flavonol derivative	patulitrin	1.30601	0.313972	0.972196	-0.58779	-3.54296	-2.11227	2.92298	2.84237
a precorrin	precorrin-1	1.30534	0.385269	0.597834	0.220716	0.0100065	-0.996395	-3.82568	-1.25668
a zealexin	zealexin B1	1.30519	0.270599	0.488048	-0.612647	-0.0177218	-9.98918	-1.72077	-10.1405
a 12-oxojasmonoyl-L-amino acid	(+)-7-epi-12-oxojasmonoyl-L-isoleucine	1.30427	0.401081	0.319552	2.75024	4.87743	-0.512833	-3.01526	4.26415
a phytoalexin // "an organic aromatic compound"	aucuparin	1.30304	0.246807	0.0266115	-14.4451	7.10944	7.5981	7.28439	3.80786
a coenzyme A-activated compound	(2E,11Z)-icosa-2,11-dienoyl-CoA	1.30171	0.846389	0.000753018	-3.60388	-3.54115	3.38734	18.4281	-3.35336
an amide	p-coumaroylserotonin	1.30164	1.27185	0.77686	0.816313	1.30018	-3.28847	1.65605	-3.59852
a modified amino acid	L-isowillardiine	1.30143	0.609627	0.732096	-3.86587	-0.569974	-0.0189357	-0.634838	0.553037
a coenzyme A-activated compound	(1R,3R)-chrysanthemoyl CoA	1.30076	1.24776	0	15.0086	-2.72057	-2.73162	-2.68728	-2.67422
an alkaloid	(+)-norpseudoephedrine	1.30029	0.526056	0.672823	3.99743	4.89151	5.49484	7.27827	5.06708
an isoflavone	7-hydroxy-2',4',5'-trimethoxyisoflavone	1.30018	1.23864	0.0155782	0.453096	0.0254335	0.471409	0.562874	2.35906
a small molecule	1,4-dihydroxy-2-naphthoyl-CoA	1.30006	0.760169

## Sheet: Red Rubin VIPs
Class	Compound	M1.VIP[5+1+0]	M1.VIP[5]cvSE * 2,44693	P value	Log FC ([Control-+] vs [Control--]) : Normalized	Log FC ([Nitrate-+] vs [Control--]) : Normalized	Log FC ([Nitrate--] vs [Control--]) : Normalized	Log FC ([Sulfate-+] vs [Control--]) : Normalized	Log FC ([Sulfate--] vs [Control--]) : Normalized
a purine // "a purine base"	adenine	1.59896	0.584475	0.628517	1.73955	15.7793	1.17187	2.23391	8.17477
a thiazole	2-(2-carboxy-4-methylthiazol-5-yl)ethyl phosphate	1.58484	0.452256	0.0912093	0.21386	-3.66438	-4.16272	-17.1159	0.923182
others	1-(4-hydroxyphenyl)-3-(2,4,6-trihydroxyphenyl)propane-1,3-dione / 2-hydroxynaringenin / dalbergioidin	1.57797	0.540265	0.729903	1.55916	-4.8052	1.05161	-3.27136	10.7443
long-chain 3-oxoacyl-CoA	3-oxoicosanoyl-CoA / 3R-hydroxy-(11Z)-eicos-11-enoyl-CoA	1.57711	0.540772	0.707033	-0.285365	22.099	16.8667	-0.122385	0.014683
brassinosteroids	campest-4-en-3β-ol / campesterol / (5α)-campestan-3-one / ergost-7-enol	1.57556	0.446294	0.729903	6.55882	24.7728	19.3472	22.551	23.1333
an adenine-type cytokinin glucoside	isopentenyladenine-9-N-glucoside	1.51672	0.904249	0.123011	0.984314	0.990105	-14.5472	1.03092	1.48034
a small molecule	narirutin	1.50446	0.366274	0	-10.3892	13.3939	12.4469	4.42938	-5.02739
a small molecule	diethyldithiocarbamate	1.50429	1.0918
alkaloids	vellosimine / cinchonidinone	1.49931	0.517902	0	0.968984	-12.7414	-12.7561	-12.7014	8.805
a small molecule	(S)-cheilanthifoline	1.49305	1.09182	0.507607	0.405068	3.92514	-6.60644	0.629572	10.5043
a coenzyme A-activated compound	(2E,5Z)-tetradecenoyl-CoA	1.48141	0.563771	0.410446	-4.02759	-19.3141	-13.7661	-1.38046	-10.4095
a protopanaxadiol-type ginsenoside with two glucosyl residues at position 3 // "a protopanaxadiol-type ginsenoside with two glucosyl residues at position 20"	ginsenoside Rb1	1.47602	0.536842	0.749493	1.55515	-0.194102	-3.55194	2.51452	-4.54664
coenzyme A-activated compounds	(11Z,14Z,17Z)-3-oxoicosatrienoyl-CoA /(3R,8Z,11Z,14Z,17Z)-3-hydroxyicosatetraenoyl-CoA	1.47132	0.649579	0.824664	-0.285365	17.4675	17.8513	-0.122385	4.82072
a small molecule	10,16-dihydroxypalmitate	1.46394	0.212604	0.511778	1.06528	0.159414	-0.361618	-0.0898515	-0.577757
a pheophytin	pheophytin a	1.46151	0.678766	0.729903	-10.912	-8.40826	-1.41935	-3.6647	-2.46393
diterpenoids	ent-kaurenol / 7β-hydroxy-ent-sandaracopimaradiene / ent-sandaracopimaradien-3β-ol / 9β-stemod-13(17)-en-19-ol / 6β-hydroxy-syn-levopimaradienolpimaradiene / ent-cassa-12,15-dien-3β-ol / taxa-4(20),11-dien-5α-ol / ent-cassa-12,15-dien-2β-ol / ent-11β-hydroxy-ent-cassa-12,15-diene / ent-isokauren-2α-ol / neoabietadienol / palustradienol / abieta-7,13-dien-18-ol / isopimara-7,15-dienol / ent-isokau…	1.45802	0.703614	0	0	23.3263	19.6789	-0.135353	5.77597
an N-acetyl-α-D-hexosamine 1-phosphate	N-acetylα-D-glucosamine 1-phosphate	1.45259	0.438517	0.0917295	4.04498	-14.5318	0.548276	5.19611	-5.08557
an indole derivative	(indol-3-yl)acetamide	1.45118	0.389467	0.0067689	19.8696	0.00304756	-0.0116748	19.269	4.65007
a medium-chain 2,3,4-saturated fatty acid // "a saturated fatty acid"	laurate	1.45105	0.238933	0.256221	1.23403	0.18047	-0.194951	0.0301029	-0.162195
a 12'-apo-carotenal	5,6-epoxy-3-hydroxy-12'-apoβ-caroten-12'-al	1.44935	0.672048	0	22.5464	17.814	-0.11079	0.0884949	17.1335
a modified nucleobase	3-deazaadenine	1.44529	1.14638	0.962247	-3.04877	0.696958	1.15665	4.35162	6.87729
a bromoaromatic compound	2-bromoporphobilinogen	1.44068	0.382636	0.723047	-4.07398	0.525145	-0.261201	1.96632	4.30693
an alkaloid	cinchoninone	1.43955	0.563332	0.476888	0.968985	-12.7414	-9.31477	-12.8532	8.805
a coenzyme A-activated compound	4-hydroxy-3-methoxyphenyl-β-hydroxypropanoyl-CoA	1.43776	0.571742	0	18.7902	-0.0216412	-0.0216412	-0.0216412	-0.0216412
a small molecule	1,3-dioctanoylglycerol	1.43333	0.193011	0.541089	1.58646	0.208556	-8.31221	-5.99744	-1.61865
a coenzyme A-activated compound // "a phenylpropanoid"	3-phenylpropanoyl-CoA	1.43264	0.647119	0	20.4731	-0.0216412	-0.0216412	-0.0216412	-0.120828
a carboxamide	5-amino-1-(5-phospho-D-ribosyl)imidazole-4-carboxamide	1.43217	0.941642
small molecules	(3E)-2-oxopent-3-enoate	1.43049	0.327969	0.280341	4.66844	17.2252	13.2813	2.1911	16.8572
a polyprenol group	dolichol-group	1.4291	0.295899	0	12.0926	-7.03866	-7.14743	1.40505	-6.94299
a long-chain 2,3,4-saturated fatty acid // "a polyunsaturated fatty acid"	(7Z,10Z,13Z,16Z,19Z)-docosa-7,10,13,16,19-pentenoate	1.42682	0.459705	0.0405899	2.70436	0.145376	-0.137417	2.04224	1.59731
an alkaloid	γ-coniceine	1.42569	0.992662	0.530664	0.182943	0.390227	0.1433	0.699349	1.20275
digalactosyldiacylglycerol-34:3	1-16:0-2-18:3-digalactosyldiacylglycerol	1.42537	0.165419	0.000159501	-10.9211	-1.73208	-0.514658	-28.6964	-0.900249
coenzyme A-activated compounds	isobutanoyl-CoA / butanoyl-CoA	1.42493	0.671569	0	19.1994	-0.0216412	-0.0216412	-0.0216412	-0.0216412
a triterpenoid	sitosterol	1.42467	0.579936	0.306732	11.4989	10.7368	26.367	3.69807	6.46138
a flavonol 3-O-glycoside	kaempferol 3-O-β-D-glucosylgalactoside	1.42406	0.853546	0.280341	-1.7442	0.279572	-5.01113	-11.5137	9.07529
a gibberellin	gibberellin A5	1.4218	0.847426	0.815257	6.84637	13.1291	14.9267	6.95758	5.32955
a 2-[(ω-methylsulfanyl)alkyl]maleate	2-[(2'-methylsulfanyl)propyl]maleate	1.42162	0.330303	0.0292398	1.10069	-0.199207	3.24454	4.04965	3.79477
a secondary metabolite	1-deoxymannojirimycin	1.41676	1.21993	0.0279824	9.9981	7.1682	1.33511	-5.43004	20.6206
monoterpenoids	(+)-carvone / (-)-carvone / 4-isopropylbenzyl alcohol / (4S)-perillyl aldehyde / (+)-menthofuran / safranal	1.41438	0.437505	0	0.0289955	0.538977	-4.99907	0.0229435	0.36898
a polyketide	4-hydroxybenzalacetone	1.41349	0.787033	0.827355	-2.15581	-1.94427	-1.56038	-5.26088	-1.10916
a sphingoid 1-phosphate	sphinganine 1-phosphate	1.4116	0.673407	0.00670526	-3.69268	-0.0253056	-3.21929	0.883837	-21.3421
a phenylpropanoid	5-hydroxy-coniferaldehyde	1.41117	0.26656
a ring	pentose-ring	1.4076	0.733537	0.448093	13.5498	13.9609	9.92318	13.4715	13.6804
a glycoalkaloid	deacetylisoipecoside	1.4057	0.674258	0.0756145	0.935116	1.0326	-15.3195	0.219191	-0.727351
#N/A		1.40079	1.26142
#N/A		1.39855	0.74569
a small molecule	α-D-galacturonate 1-phosphate	1.39801	0.283632	0.514525	8.58171	-0.103342	-0.218499	18.4005	18.853
Flavonoids	apigenin 7-O-(6-malonyl-β-D-glucoside) / pelargonidin-3-O-(6\-O-malonyl-β-D-glucoside)	1.39785	0.748297	0.606639	0.26809	-19.1374	-12.6856	-15.9569	-3.62624
a flavonol-7-O-β-D-glucosides	quercetagetin 7-O-glucoside	1.39755	0.143838	0.733336	3.47825	-13.6862	-13.8	-13.832	-13.893
a catechol	8'-(3,4-dihydroxy-5-alkenyl)phenyl-3-[9'E,11'E,13'Z-pentadecatrienyl]catechol	1.39736	0.701293	0.729903	-1.30095	-1.75313	-6.40926	-0.433164	-0.948642
a dinucleotide	nicotinamide hypoxanthine dinucleotide	1.39495	0.439024	0.529721	10.4174	11.5829	8.28225	11.1453	10.904
a coenzyme A-activated compound	2-methylacetoacetyl-CoA	1.39372	0.422226	0.235787	13.2101	11.6985	11.0927	8.31532	-6.9361
a terpenoid derivative	(E)-geranylacetone	1.39322	0.972262	0.980632	-4.6179	-6.01944	0.194076	-9.08235	-2.45956
gallotannins	3-O-digalloyl-1,2,4,6-tetra-O-β-D-galloylglucose / 2-O-digalloyl-1,3,4,6-tetra-O-β-D-galloylglucose	1.39177	0.165749	0	3.40421	-13.816	-14.1529	-13.9815	-13.816
a chloroaromatic compound	pentachlorophenol	1.39094	1.29336	0.690416	-1.23022	-1.81058	-5.64477	-2.07631	-1.85313
a 1-palmitoyl-2-acyl-sn-glycero-3-phosphocholine	1-palmitoyl-2-vernoloyl-phosphatidylcholine	1.38925	0.94593	0.704258	-7.6766	-7.21489	-0.388243	-7.21482	-12.0513
an oleanonic-acid-type saponin ginsenoside	ginsenoside Ro	1.38903	0.930104	0.836143	-0.101885	5.35517	2.33739	1.08449	0.263595
a radical	monodehydroascorbate radical	1.38846	0.40564	0.00203599	20.3782	0.00304794	3.28092	17.0355	20.0602
a dinucleotide	nicotinate adenine dinucleotide	1.38768	0.465856	0.793305	1.02562	2.23095	-1.46923	1.83541	1.5444
a small molecule	16-hydroxytabersonine	1.38749	0.274511	0.756538	-1.05646	-4.19267	3.11337	18.3273	18.6827
coenzyme A-activated compounds	(R)-3-(phenyl)lactoyl-CoA / dihydro-4-coumaroyl-CoA / 3-hydroxy-3-phenylpropanoyl-CoA	1.38725	0.767508	0	19.5072	-0.0216412	-0.0216412	-0.0216412	-0.0216412
a pyrimidine ribonucleoside	cytidine	1.38632	0.91346	0.666126	-1.11406	-0.176684	-6.61187	-0.741371	-0.463312
phenols	(22S,24R)-22-hydroxy-5α-ergostan-3-one / 6-oxocampestanol / 2,3-dimethyl-6-phytyl-1,4-benzoquinol / β-tocopherol / γ-tocopherol	1.38608	0.653557	0	24.8371	17.9864	5.68483	0.125116	12.564
|Unclassified-Compounds|	D-isocitrate	1.38448	0.452568	0.529721	0.353687	-2.21467	1.18863	-0.790071	0.00863972
pyrimidine nucleosides	cytidine 2'-monophosphate / cytidine-3'-monophosphate / CMP	1.38316	0.324526	0.815257	-0.23382	-0.249837	-2.41831	3.49961	4.03144
a phosphate monoester	ethylphosphate	1.38294	0.68884	1.72886e-23	-19.2009	0.309339	0.0124725	-19.0379	0.625186
a long-chain &omega;-hydroxy fatty acyl-CoA	18-hydroxyoleoyl-CoA	1.38288	0.424924	0.875393	-0.0126553	-11.6307	-13.4959	-13.622	-19.2743
a flavonol derivative	3,7,4'-trimethylquercetin 2'-O-β-D-glucoside	1.38273	0.520575	0.621362	5.33386	5.03672	4.67276	4.0485	-6.42845
a toxin // "a lignan"	6-methoxypodophyllotoxin	1.38211	0.386906	0.674706	2.197	2.43144	-4.39224	-1.32359	-1.20385
a diadenosine polyphosphate	P1,P5-bis(5'-adenosyl) pentaphosphate	1.38083	0.758358	0	19.6606	3.37397	2.78321	-0.498422	-0.344893
a quinone	deoxyshikonin	1.37988	0.444627	0.950006	-7.57092	-21.0942	-11.3941	-21.2196	-10.6435
a 3-[(&omega;-methylsulfanyl)alkyl]malate	3-[(6'-methylsulfanyl)hexyl]malate	1.37738	0.376166	0.0402715	-0.0246501	-23.0758	-14.9108	1.83088	-16.98
an indole derivative	indolin-2-one	1.37688	0.409176	0.969095	0.271929	5.06018	3.7022	5.69649	5.87801
C4-dicarboxylates	fumarate / maleate	1.37596	1.73478
a 1,2-diacyl-3-O-(β-D-galactopyranosyl)-sn-glycerol	1-18:3-2-16:4-monogalactosyldiacylglycerol	1.37521	0.903299	0.815305	-1.31861	-5.88997	-2.56397	-2.51612	-2.49107
a small molecule	luteone	1.37486	1.22184	0	20.6319	0	16.4698	9.67758	14.8278
others	5,6-epoxy-3-hydroxy-9-apo-β-caroten-9-one / (-)-methyl jasmonate	1.37378	0.297472	0	0.554659	1.26186	-11.142	-0.491345	-12.1701
others	bisdemalonylsalvianin / pelargonidin-3,5-diglucoside-5-O-caffeoylglucoside	1.3701	0.511254	0	-0.36198	-23.6627	-16.1792	-0.658661	-1.03001
an oryzalexin	oryzalexin C	1.36999	0.739465	0.692765	-9.79249	-11.1134	-12.9992	-2.29696	-8.05652
monoterpenols	(S)-(-)-citronellol / (+)-neomenthol / (+)-isomenthol / (+)-neoisomenthol	1.36689	0.375671	0.942252	-0.285366	19.5148	19.9699	19.7694	20.118
a 3β-hydroxy-4&alpha;-carboxysteroid	4α-carboxy-4β,14α-dimethyl-9β,19-cyclo-5α-ergost-24(241)-en-3β-ol	1.36655	0.649484	0.733336	0.296261	2.46924	3.06372	2.42396	1.30922
a coumarin	ayapin	1.36629	0.388887	0.850355	-0.00398892	0.542846	0.829284	2.26412	2.33982
an indole derivative	2-oxoindole-3-acetate	1.36616	0.380904	0.83987	0.00427371	0.540064	0.835628	2.27756	2.34678
a coenzyme A-activated compound	malonyl-CoA	1.36574	0.788082	3.12701e-25	19.0001	0.0094367	-0.10572	-0.122385	-0.120828
coenzyme A-activated compounds	dihomo γ-linolenoyl-CoA / (11Z,14Z,17Z)-icosatrienoyl-CoA / (2E,11Z,14Z)-icosatrienoyl-CoA	1.36549	1.79624	0.744548	1.54226	-7.07836	0.335305	-7.20379	-1.91713
a retinal // "an aldehyde"	all-trans-retinal	1.3627	0.45511	0.000159501	9.68519	23.1262	23.5827	-0.122385	22.1929
a small molecule	pimeloyl-CoA	1.36048	0.634574	0	18.4971	10.5605	-0.10572	3.42668	0.0311428
an alkenyl-glucosinolate	4-pentenyl-glucosinolate	1.35961	0.218986	0.02343	13.6843	0.00304604	5.72997	17.3088	17.5544
hydroxyisoflavanones	2,5,7-trihydroxy-4'-methoxyisoflavanone / (2S)-hesperetin	1.35891	0.712463	0	-0.00151781	-4.02586	-2.28129	-2.05575	0.0873831
carotenes	9,15,9'-tri-cis-ζ-carotene / all-trans-ζ-carotene	1.35793	0.333593	0.788251	0.572052	-17.4141	-14.7369	-18.059	-11.0486
an indole derivative	HBOA	1.35672	0.317666
a nitroaromatic compound // "a nitrile"	entacapone	1.35671	0.398712	0.93731	0.10433	-0.951144	-0.924617	-0.511287	-0.453013
carbohydrate derivatives	α-(2,6-anhydro-3-deoxy-D-arabino-heptulopyranosid)onate 7-phosphate / β-(2,6-anhydro-3-deoxy-D-arabino-heptulopyranosid)onate 7-phosphate	1.3552	1.22716	0.729903	-0.0931266	0.112905	-3.17257	0.233762	0.647603
an alkaloid	6-O-methyl-N-deacetylisoipecoside aglycon	1.35512	1.41868	0.706762	-5.22606	-1.24946	-4.8166	-1.17337	-0.650999
a small molecule	kynurenate	1.35484	0.538836	0.621362	-0.321391	-0.134871	0.0628874	1.65745	1.13651
a small molecule	12-hydroxydihydrochelirubine	1.35478	0.135394	0.448093	0.160894	-26.8086	-13.0312	0.957029	1.02969
an (E)-ω-(methylsulfanyl)alkanal oxime	(E)-6-(methylsulfanyl)hexanal oxime	1.35441	0.723788	0.640944	3.43704	0.345384	2.12274	-6.3669	6.19314
a xyloside // "a p-nitrophenyl-modified glycoside" // "a C-nitro compound"	p-nitrophenyl-β-D-xylobioside	1.35334	0.431071	0.727773	2.644	-0.231127	0.254912	-2.56648	0.00474043
an aromatic (R)-hydroxynitrile	(R)-3,4-dihydroxymandelonitrile	1.35321	0.327695	0.229883	1.56213	3.67192	-1.58901	-1.403	-0.737277
amino acids	L-glutamate-5-semialdehyde / 5-aminolevulinate / trans-4-hydroxy-L-proline / 5-amino-2-oxopentanoate	1.35303	0.159936	0	-3.48157	0.0576702	-3.54657	-12.2056	-0.0546638
a flavonol derivative	patulitrin	1.35299	0.34467	0.729903	3.98359	3.9123	4.24599	6.13394	6.0072
an alkaloid	conhydrine	1.35217	1.04576	0.738333	0.442463	0.867497	-2.98962	0.986184	1.65777
a small molecule	4-coumaroyl-diketide	1.3509	0.885556	0.722726	7.63046	3.89586	-5.10048	7.60751	7.75468
an alkaloid	α-chaconine	1.3508	1.00876	0.712842	0.761125	3.28213	-2.30294	6.15523	-4.32744
a triterpenoid	presqualene diphosphate	1.35075	1.57258	0.640944	3.47018	0.00304756	7.84163	-0.122385	-0.120828
a flavone	wogonin 7-O-β-D-glucuronate	1.35049	0.197686	0.749471	-3.69746	-0.724044	0.588767	2.91181	2.76919
a pyrimidine 2'-deoxyribonucleoside 5'-monophosphate // "a pyrimidine"	dTMP	1.35034	0.33725	0.836143	-1.16737	-0.944477	-2.20911	2.03406	3.5071
a small molecule	α-D-glucosamine 1-phosphate	1.34801	0.259106	0.717369	0.226132	0.524099	0.593409	1.37291	1.96025
a small molecule	salvianin	1.34787	0.863054	0	18.8819	-0.0216412	-0.0216412	-0.0216412	-0.0216412
an (L-cysteinylglycine)-S-conjugate	(Z)-1-(L-cysteinyglycin-S-yl)-N-hydroxy-2-phenylethan-1-imine	1.34501	0.472797	0.602847	-3.76226	-22.8229	-16.4278	-10.0975	-18.3073
a (4R)-4,2'-dihydroxyisoflavan	(3R,4R)-7,2'-dihydroxy-4'-methoxyisoflavanol	1.34367	0.396531	0.0912093	-2.21958	-8.1601	1.53395	8.48757	-12.1522
a small molecule	3-dehydroquinate	1.3431	0.41897	0.946947	-3.07988	-2.7634	-2.01012	2.26988	2.97834
a purine ribonucleoside	xanthosine	1.34289	0.122953	0.738333	5.85826	9.1943	10.0108	11.8537	11.991
others	5,7-dihydroxy-2-methylchromone / isoscopoletin / scopoletin	1.3427	0.361203	0.507607	8.13844	8.47444	8.7142	9.42235	9.4241
a quinone	juglone	1.34254	0.334183	0.727582	4.27049	4.62611	4.68517	5.58757	5.5872
a small molecule	N-carbamoylputrescine	1.34221	0.693984	0.637858	-0.862063	-0.00564423	-4.12444	-0.487644	1.63332
glucosides	1-naphthol 6'-O-malonylglucoside / 2-naphthol 6'-O-malonylglucoside	1.33984	0.611946	0.733336	0.170174	0.415562	-2.67043	1.07178	2.27785
a small molecule	L-arogenate	1.33921	0.705334	0.754414	4.67083	4.75102	0.548468	4.30819	4.79988
a medium-chain primary alcohol	1-dodecanol	1.33827	0.507776	0.529721	-1.36425	-4.30979	1.29436	1.14396	-0.76271
coenzyme A-activated compounds	densipoloyl-CoA / 18-hydroxylinoleoyl-CoA	1.33791	0.516689	0.254053	14.7878	-9.63332	-1.83256	14.325	14.0994
a small molecule	4-coumaroyl-3',4'-dihydroxyphenyllactate	1.3368	0.555819	0.514525	17.0032	18.4432	14.7716	18.0617	11.873
an organofluorine compound // "a pentose 1-phosphate"	5-fluoro-5-deoxy-D-ribulose 1-phosphate	1.33627	1.0967	0.529721	-0.116528	0.114155	-6.93689	0.269643	0.589274
others	ellipticine / 3,3'-di(indol-3-yl)methane	1.33594	0.252635	0.717308	4.60505	4.31895	5.18221	5.92644	5.63603
an aromatic glucosinolate	glucotropaeolin	1.33555	1.45251	0.729903	-9.04282	-11.6334	-8.30818	-11.7922	-11.7573
a flavonol derivative	3,7,4'-trimethylquercetagetin 3'-O-β-D-glucoside	1.33461	0.566559	0.677256	5.33386	5.03672	4.67276	4.0485	4.1433
an inorganic anion	selenate	1.33401	1.67068
a long-chain 3-oxoacyl-CoA	3-oxo-auricoloyl-CoA	1.33399	0.501981	0.729903	3.1651	1.77892	-2.19933	-2.0628	0.609632
an aromatic aldehyde	benzaldehyde	1.33242	0.429931	0.749493	0.704169	0.293504	-0.36691	-0.125695	-0.3436
a simple coumarin	7-hydroxy-8-methoxycoumarin	1.3323	0.260702	0.729903	0.132657	0.468662	0.708419	1.41657	1.41832
a bile acid	deoxycholate	1.33217	0.502838	0.717369	0.940036	0.0933792	0.0107988	-4.73529	0.0341448
a porphyrin	uroporphyrin I	1.33167	0.37554	0	10.844	10.4314	-3.47912	-3.4363	-3.4363
long-chain fatty acids	18-hydroxyoleate / 9,10-epoxystearate	1.33147	1.24025	0.306732	-1.00897	-1.55618	-8.47237	-22.2664	-11.5276
an amino acid derivative // "an L-amino acid"	hypusine	1.33109	0.900273	0.514525	-7.15365	0.866518	-4.01191	-0.78589	-6.25328
a coenzyme A-activated compound	feruloylacetyl-CoA	1.33094	0.854006	0	19.2523	-0.0216412	-0.0216412	-0.0216412	-0.0216412
a flavone	isovitexin-7-O-xyloside	1.33053	0.391562	0.43039	0.259797	-21.8652	-11.1566	0.0868329	-0.103943
flavonoids	robustaquinone D / 7,2'-dihydroxy-4',5'-methylenedioxyisoflav-3-ene / 7,4'-dihydroxy, 8-methoxyflavone / genkwanin / calycosin / prunetin / wogonin / (-)-maackiain / 2-hydroxyformononetin / (+)-maackiain	1.32915	0.277642	0.529721	0.237135	0.153287	0.819132	2.49176	2.2522
a guaiacol	3-methoxytyramine	1.329	0.521143	0.657098	-0.469228	-1.05612	-8.24125	-2.34811	2.15198
a methyl ketone	pseudoionone	1.3287	1.81391	0.639743	3.2998	0.00304756	8.0294	-0.122385	-0.120828
a 2-methoxy-6-(all-trans-polyprenyl)phenol	6-(all-trans-decaprenyl)-2-methoxy-phenol	1.32854	0.759669	0.784169	-1.61834	-8.9852	-12.8687	-2.5959	-1.69785
a small molecule	4-coumaroylacetyl-CoA	1.32718	0.776732
a coenzyme A-activated compound	4-hydroxycrotonyl-CoA	1.32644	0.864955	0.00021777	18.0659	3.46133	-0.10572	-0.122385	-0.120828
a disaccharide	benzyl alcohol 6-O-β-D-xylopyranosyl-β-D-glucopyranoside	1.32637	0.894752	0.488074	-0.478694	-0.189186	-0.704013	-0.395254	-0.114466
a coenzyme A-activated compound	6'-hydroxyferuloyl-CoA	1.32625	0.900727	0	18.8645	-0.0216412	-0.0216412	-0.0216412	-0.0216412
a small molecule	prephenate	1.32624	1.10111	0.701159	7.03921	7.77899	7.99551	7.3997	2.80135
a triterpenoid	glycyrrhetinate	1.32623	0.892824	0.530664	6.93622	14.7091	18.932	-4.25252	7.02612
a small molecule	dihydrosanguinarine	1.32608	0.234208	0.489713	0.480128	0.737142	1.49379	2.21272	2.20588
a modified amino acid	N-propargylglycine	1.32501	0.354605	0	4.26692	-17.3105	-6.85871	-17.5316	-7.4674
others	(Z)-phenylacetaldehyde oxime / 2-phenylacetamide	1.32423	0.623695	0	-2.51637	-13.8486	-2.50034	-10.1821	9.63527
a small molecule	Triton X-100	1.3241	0.57147	0.692136	-5.16163	-5.00461	-12.8748	-1.61272	-1.83501
|Unclassified-Compounds|	pyrroline 5-carboxylate	1.32408	0.348428	0.608157	-0.285365	0.00304756	-0.10572	-0.122385	0.0342041
3-β-hydroxysteroids	5α-cholesta-7,24-dien-3β-ol / desmosterol / 7-dehydrocholesterol	1.32386	0.823076	0.835002	-10.1038	-9.10667	1.16335	-13.4636	3.22421
a small molecule	1-methylpyrrolidine-2-acetyl-CoA	1.32341	0.85998
others	N-(4-hydroxybenzoyl)-L-glutamate / nitecapone	1.32259	0.505312	0.701159	0.180483	-0.0293411	-6.70718	1.3497	1.28098
a small molecule	thiamine phosphate	1.3217	0.15412	0.480985	0.127759	0.138874	0.536121	0.917349	0.954407
a small molecule	(E,E)-piperoyl-CoA	1.32147	0.878314	#N/A	#N/A	#N/A	#N/A	#N/A	#N/A
a brassinosteroid	24-epi-campesterol	1.32021	0.233352	0.61193	-2.02978	0.0740013	-5.35157	-2.14782	-1.56553
a small molecule	malonyldaidzin	1.31959	0.269094	0.717369	4.03198	4.079	4.30172	5.71466	5.83911
a small molecule	sanguinarine	1.31908	0.217198	0.65269	-0.462636	0.411826	1.19884	1.8874	1.86461
an acetyl ester	(3Z)-hex-3-en-1-yl acetate	1.31893	1.02289	0.729903	3.41764	14.0331	3.39796	3.32751	5.34646
a small molecule	N6-(δ2-isopentenyl)-adenosine 5'-monophosphate	1.31836	0.113806	0.700812	-0.120827	0.0877644	-0.53461	-1.91598	-1.96777
a small molecule	3,3-dimethyl-2-oxobutyric acid 5-(6-aminopurin-9-yl)-3,4-dihydroxytetrahydrofuran-2-ylmethyl ester	1.31747	0.62496	0.306732	0.0485922	0.161354	0.110584	-3.0881	-16.9809
a small molecule	UO2+	1.31739	0.391093	0.85869	0.630255	0.88088	-1.69065	3.15283	3.09537
others	α-linolenoyl-CoA / β-hydroxy-germacra-1(10),4,11(13)-trien-12-oate / zealexin A2 / zealexin A3	1.315	0.561064	0.756538	5.36754	2.88386	2.37285	-3.97897	-2.80196
small molecules	glycerol 2-phosphate / sn-glycerol 3-phosphate	1.31345	0.61009
a small molecule	α-3',4'-anhydrovinblastine	1.31344	1.00359	0.280341	0.142447	0.978286	-11.0688	-2.37137	-1.47252
others	(13S,14R)-13-O-acetyl-1,8-dihydroxy-N-methylcanadine / sinapoyl-CoA	1.31341	1.46333	0.475296	6.32358	0.00304756	7.64687	-0.122385	11.3985
digalactosyldiacylglycerol-34:3	1-18:3-2-16:0-digalactosyldiacylglycerol	1.31296	0.241025	0.00489354	-7.40851	-1.73208	-0.514658	-1.16561	-0.900249
an aldoxime	(E)-2-(1H-indol-3-yl)-1-thioacetohydroximate	1.31285	0.375566	0.793524	0.714292	7.61285	1.15897	8.88632	8.76604
a hydrolyzable tannin	1-O,6-O-digalloyl-β-D-glucose	1.31213	0.885395	0.755738	0.173371	0.453737	0.0730471	1.19846	1.36598
nucleosides	2'-deoxyguanosine 3'-monophosphate / AMP group / vidarabine phosphate / adenosine 2'-monophosphate / adenosine 3'-monophosphate / 3'-azido-3'-deoxythymidine 5'-phosphate / AMP / dGMP	1.31059	0.185476	0.351583	0.215297	0.0979168	0.706749	1.23625	1.31121
an alkaloid	noscapine	1.30933	0.307896	0.783449	4.85414	5.06026	2.68764	2.04494	1.55157
carotenoids	lactucaxanthin / zeaxanthin / lutein/ 4,4-dihydroxy-all trans-carotene	1.30932	0.434268	0	8.93167	17.7269	17.6004	-7.50499	12.37
an (E)-ω-(methylsulfanyl)alkanal oxime	(E)-4-(methylsulfanyl)butanal oxime	1.309	0.855864	0.729903	-0.465164	9.90392	1.42974	1.47508	7.21869
a xanthophyll	3,4,3',4'-tetradehydroisozeaxanthin	1.30843	0.557276	0.0896223	18.0907	-5.11454	12.7834	-0.5883	14.9529
a small molecule	EGTA	1.30806	0.244171	0.529721	0.181944	0.0391781	0.465855	1.30994	1.29657
an oxidized flavin // "a vitamin"	riboflavin	1.30803	0.407827	0.454555	5.62775	6.58778	4.09394	-3.16629	4.65681
a small molecule	5-pentadecatrienyl resorcinol-3-methyl ether	1.30757	0.365723	0.0199379	23.8304	0.00304756	3.53858	19.6696	17.4019
a 3β-hydroxysteroid	4α-hydroxymethyl-4β-methyl-5α-cholesta-8,24-dien-3β-ol	1.30645	0.576755	0.621362	-0.182816	-0.102946	1.47977	3.40244	0.684091
coenzyme A-activated compounds	3-oxo-lesqueroloyl-CoA / (3R)-hydroxy-auricoloyl-CoA	1.30624	0.534486	0.00795769	-3.95722	0.0321994	-0.824819	-2.35857	-1.18732
small molecules	3-methyl-2-oxobutanoate / glutarate semialdehyde	1.30443	1.42518	0	3.67163	0.00304756	9.60131	-0.136894	-0.0360455
flavonol derivativeS	syringetin / gossypetin 3',8-dimethyl ether / quercetagetin 3',6-dimethyl ether / eupatolitin / 3,3'-dimethylmyricetin / 3',4'-dimethylmyricetin	1.30424	0.200707	0.306732	0.242659	0.0849422	0.688456	1.18997	1.30982
a thiazole	2-[(2R,5Z)-2-carboxy-4-methylthiazol-5(2H)-ylidene]ethyl phosphate	1.30414	0.728015	0.717369	0.21386	-0.171836	-0.865616	0.000800282	0.923182
a medium-chain trans-2,3-dehydroacyl-CoA	(2E)-oct-2-enoyl-CoA	1.30408	0.907726
a small molecule	luteolin 7-O-[β-D-glucosyluronate-(1,2)β-D-glucosiduronate]-4'-Oβ-D-glucosiduronate	1.30376	0.105033	0	3.50229	3.1981	-1.0766	3.04953	3.04953
adenine-type cytokinin glucosides	dihydrozeatin-O-glucoside / dihydrozeatin-7-N-glucose	1.30325	0.207463	0	0.134085	0.553682	-8.89867	-25.7291	-0.17718
monogalactosyldiacylglycerol-36:6	1-18:3-2-18:3-monogalactosyldiacylglycerol	1.30273	1.24953	0.538874	-5.748	-1.39538	0.637411	-3.59745	-8.632
a quinol	2-methyl-6-farnesyl-1,4-benzoquinol	1.30262	0.451918	0.448093	11.036	8.71253	8.02117	10.5276	9.73123
a modified nucleotide	5-amino-6-(5-phospho-D-ribosylamino)uracil	1.30209	0.452513	0.489713	7.83336	7.191	7.4016	6.09206	6.12899
a methyl farnesoate	methyl (2E,6E)-farnesoate	1.30177	1.03556	0.753867	6.63604	14.2647	-1.05604	-0.997648	-4.89605
a modified nucleotide	guanosine tetraphosphate	1.30166	0.670179	0	-21.1525	1.68093	1.18504	-6.82145	0.261762
a small molecule	1,3-dihydroxy-N-methylacridone	1.30123	1.12004	0.788319	-0.37231	0.821164	-4.70936	-4.13335	-9.34593
a small molecule	9-[6(RS)-C-carboxamido-5,6,7-trideoxy-β-D-ribo-octofuranosyl]-9H-purin-6-amine	1.30119	0.981441	0.507607	0.266814	0.000778198	-7.95848	-7.32746	1.25616
a small molecule	3S-(4-hydroxyphenyl)-3-hydroxy-propanoyl-CoA	1.30086	0.912598	0	18.2748	3.50867	-0.0116748	-0.0216412	-0.0216412
a small molecule	(3R)-3-hydroxy-1,2-didehydro-2,3-dihydrotabersonine	1.30074	1.42138	0.673004	-1.56499	-1.03215	-1.07743	-0.381328	-0.0258827
an acyl-CoA	18-oxo-oleoyl-CoA	1.30034	0.555313	0.621362	7.59717	6.222	4.79329	7.13436	6.9088
an aromatic compound	salidroside	1.30021	0.237914	0.797465	-0.0483948	-0.160611	-3.18711	1.31128	1.12262
