# Supplementary material for: Nutraceutical Profiles of Two Hydroponically Grown Sweet Basil Cultivars as Affected by the Composition of the Nutrient Solution and the Inoculation With Azospirillum brasilense
Source: Front Plant Sci. 2020 Nov 5;11:596000. doi: 10.3389/fpls.2020.596000 (PMC7674207; doi:10.3389/fpls.2020.596000)
Supplement: Supplementary Table 5 — Differential metabolites as derived from Volcano analysis (P < 0.05; FC > 1.5) of leaves of sweet basil plants. Plants were grown in control hydroponic solution, in a NO3– or in a SO42– over-fertilized nutrient solution, either non-inoculated or inoculated with A. brasilense. [file Table_5.XLSX]

## Sheet: Volcano Genovese
Compound	A. brasilense	Nitrate	Nitrate + A. brasilense	Sulfate	Sulfate + A. brasilense	VIP	Ontology - parents of class	InChI-Key	SMILES
1-16:0-2-18:3-digalactosyldiacylglycerol	-5.94	-19.7	-0.4	-23.99	-28.98		lower eukaryotes)" // "icosapentaenoate biosynthesis I (lower eukaryotes)" // "docosahexaenoate biosynthesis I (lower eukaryotes)" // "linoleate biosynthesis I (plants)" // "dimorphecolate biosynthesis" // "hydroxylated fatty acid biosynthesis (plants)"	digalactosyldiacylglycerol-34:3	InChIKey=WVWINZZVFAFVMJ-HZDSJJKASA-N	CCC=CCC=CCC=CCCCCCCCC(O[C@@H](CO[C@H]2(O[C@H](CO[C@H]1(O[C@H](CO)[C@H](O)[C@H](O)[C@@H](O)1))[C@H](O)[C@H](O)[C@@H](O)2))COC(=O)CCCCCCCCCCCCCCC)=O
phenylethyl acetate	-4.59	-26.4	-17.72	-26.26	-26.36	*	a carboxylic ester	InChIKey=MDHYEMXUFSJLGV-UHFFFAOYSA-N	CC(OCCC1(/C=CC=CC=1))=O
dihydrozeatin-<i>O</i>-glucoside	-0.05	-22.38	0.24	-1.48	-26.32	*	an adenine-type cytokinin glucoside	InChIKey=QRZHDHJUYBONQQ-JSYMRTRDSA-N	C[C@@H](CCNC1(C2(\\N=CNC(\\N=CN=1)=2)))CO[C@H]3([C@@H]([C@H]([C@@H]([C@H](O3)CO)O)O)O)
columbamine	-0.28	-7.84	-0.09	-0.27	-24.27		a small molecule	InChIKey=YYFOFDHQVIODOQ-UHFFFAOYSA-O	COC3(\\C=CC4(C=C1([N+](CCC2(/C\\1=C/C(/O)=C(C=2)/OC))=CC(C(/OC)=3)=4)))
1,2-dehydroreticuline	-8.24	-24.11	-8.45	-15.85	-24.07		a small molecule	InChIKey=ZALYXKJOOUDZCC-UHFFFAOYSA-O	C2(CC3(/C(\\C(CC1(/C=C(O)C(\\OC)=C/C=1))=[N+](C)2)=C/C(/O)=C(C=3)/OC))
3-methylxanthine	-0.46	-23.85	-0.18	-16	-23.8	*	a small molecule	InChIKey=GMSNIKWWOQHZGF-UHFFFAOYSA-N	CN1(C(NC(C2(NC=NC1=2))=O)=O)
6-amino-2-oxohexanoate	-0.94	-23.25	-4.3	-11.99	-23.21		side chain elongation cycle" // "Organic Nitrogen Assimilation" // "dimethylsulfoniopropanoate biosynthesis I (Wollastonia)" // "L-asparagine degradation II" // "L-homomethionine biosynthesis" // "dimethylsulfoniopropanoate biosynthesis III (algae)" // "<i>S</i>-methyl-5-thio-&alpha;-D-ribose 1-phosphate degradation I"	a 2-oxo carboxylate	InChIKey=GWENQMVPLJAMAE-UHFFFAOYSA-N	C(CC(=O)C(=O)[O-])CC[N+]
6&beta;-hydroxy-<i>syn</i>-pimaradiene	-22.73	-11.18	0.72	-18.84	-22.81	*	a diterpenoid	InChIKey=VRCLHAIGCBXGLG-HPUSYDDDSA-N	C=C[C@]3(CC[C@@H]2([C@@]1(CCCC(C)(C)[C@@H]1[C@H](O)C=C2C3)C))C
14-demethyllanosterol	-18.66	-13.19	3.92	-22.38	-22.5		a 3&beta;-hydroxysteroid	InChIKey=CHGIKSSZNBCNDW-QGBOJXOESA-N	CC(C)=CCC[C@@H](C)[C@@H]2(CC[C@@H]3(C4(/CC[C@@H]1(C(C)(C)[C@@H](O)CC[C@@](C)1C(/CC[C@](C)23)=4))))
2-dehydrolubimin	-8.69	-22.25	4.75	-18.22	-22.2		a sesquiterpenoid	InChIKey=RXSSJEZNYYKUBE-BHPKHCPMSA-N	C=C([C@@H]2(C[C@@]1([C@@H](CC(C[C@H](C=O)1)=O)C)CC2))C
<i>N</i>-propargylglycine	-3.75	-18.4	-22.04	-18.49	-22.04		a modified amino acid	InChIKey=DGYHPLMPMRKMPD-BYPYZUCNSA-N	C#CC[C@@H](C(=O)[O-])[N+]
1-oleoyl-2-&alpha;-linolenoyl-phosphatidylcholine	-21.88	-6.9	-3.27	-17.29	-21.91		as a signaling molecule" // "choline biosynthesis III" // "superpathway of choline biosynthesis" // "arachidonate biosynthesis I (6-desaturase	lower eukaryotes)" // "icosapentaenoate biosynthesis I (lower eukaryotes)" // "docosahexaenoate biosynthesis I (lower eukaryotes)" // "linoleate biosynthesis I (plants)" // "dimorphecolate biosynthesis" // "hydroxylated fatty acid biosynthesis (plants)" // "triacylglycerol biosynthesis (Chlamydomonas)" // "phospholipid desaturation"	phosphatidylcholine-36:4	InChIKey=FVQGNFUBHWGFCY-HJOYQDMMSA-N	CCCCCCCCC=CCCCCCCCC(OC[C@@H](OC(=O)CCCCCCCC=CCC=CCC=CCC)COP([O-])(=O)OCC[N+](C)(C)C)=O
luteone	-0.11	-21.9	1.15	-11.82	-21.86		a small molecule	InChIKey=MMPVAPMCVABQPS-UHFFFAOYSA-M	CC(C)=CCC3(\\C(/O)=C1(C(\\OC=C(C1=O)C2(/C(\\O)=C/C(\\O)=C/C=2))=C/C(\\[O-])=3))
icosatetraenoate	-21.56	-14.27	-7.29	-21.31	-21.44	*	a long-chain 2,3,4-saturated fatty acid // "a &omega;-3 fatty acid"	InChIKey=HQPCSDADVLFHHO-LTKCOYKYSA-M	CCC=CCC=CCC=CCC=CCCCCCCC([O-])=O
(<i>S</i>)-4-amino-4,5-dihydro-2-thiophenecarboxylate	-1.12	-21.25	0.45	-2.42	-21.23		a carboxylate	InChIKey=UPSMRUXNZUWKMB-VKHMYHEASA-N	C1(SC(\\C(=O)[O-])=C/[C@@H]([N+])1)
codeinone	-3.19	-21.11	-21.11	-21.11	-21.11	*	a small molecule	InChIKey=XYYVYLMBEZUESM-CMKMFDCUSA-O	C[N+]4(CC[C@]15([C@H]3(C(=O)C=C[C@@H]([C@@H](CC2(/C=CC(/OC)=C(C\\1=2)/O3))4)5)))
ajugose	0.41	-20.85		-7.95	-20.81	*	an hexasaccharide	InChIKey=NCIHJQNXRKJRMJ-HKJJPIHFSA-N	C(O)[C@H]1([C@H](O)[C@H](O)[C@@H](O)[C@H](O1)OC[C@H]2([C@H](O)[C@H](O)[C@@H](O)[C@H](O2)OC[C@H]3([C@H](O)[C@H](O)[C@@H](O)[C@H](O3)OC[C@H]6([C@H](O)[C@H](O)[C@@H](O)[C@@H](OC[C@H]5([C@@H](O)[C@H](O)[C@@H](O)[C@@H](O[C@@]4(CO)([C@@H](O)[C@H](O)[C@@H](CO)O4))O5))O6))))
isovitexin 2''-<i>O</i>-arabinoside	-0.05	-17.38	0.22	-13.66	-20.51	*	a flavone	InChIKey=AGWLCWWJARYSTD-MCTXPTQWSA-M	C1(O[C@H]([C@H]([C@H](O)[C@@H]1O[C@H]5([C@@H](O)[C@H](O)[C@@H](CO)O[C@@H](C4(\\C(/O)=C3(C(\\OC(\\C2(/C=CC(\\O)=C/C=2))=C/C(=O)3)=C/C(\\[O-])=4)))5))O)O)
pelargonidin 5-<i>O</i>-&beta;-<i>D</i>-glucoside 3-<i>O</i>-&beta;-<i>D</i>-sambubioside	-16.56	-16.23	-3.47	-20.32	-20.45		an anthocyanin	InChIKey=NNEATHLRLZWIRN-MRBLLYQQSA-N	C6(/C(\\C5(\\[O+]=C2(C(\\C(\\O[C@@H]1([C@@H]([C@H]([C@H](O)[C@H](O1)CO)O)O))=C/C(\\[O-])=C/2)=C/C(\\O[C@H]4(O[C@@H]([C@@H](O)[C@H](O)[C@@H](O[C@H]3(OC[C@@H](O)[C@H](O)[C@@H](O)3))4)CO))=5)))=C/C=C(O)C=6)
5-hydroxyferulate	-3.25	-20.45	-6.33	-9.79	-20.41		a phenylpropanoid	InChIKey=YFXWTVLDSKSYLW-NSCUHMNNSA-M	COC1(\\C=C(C=CC([O-])=O)C=C(O)C(/O)=1)
pilosin	4.1	-19.94	3.84	-19.77	-19.9		a methoxyflavone // "a trihydroxyflavone"	InChIKey=ASAOSMVQLGTAQO-UHFFFAOYSA-N	COC3(/C=CC(\\C1(/OC2(\\C(/O)=C(C(/OC)=C(C(/C(=O)C=1)=2)/O)/O)))=C/C=3)
allicin	-3.31	-10.02	-0.04	-6.38	-19.1		a dialkyl-thiosulfinate	InChIKey=JDLKFOPOAOFWQN-UHFFFAOYSA-N	C=CCSS(CC=C)=O
chrysophanol	-3.3	-19.14	-3.43	-18.97	-19.09		a hydroxyanthraquinone	InChIKey=LQGUBLBATBMXHT-UHFFFAOYSA-N	CC1(/C=C(O)C2(/C(=O)C3(\\C(\\O)=C/C=CC(/C(=O)C(\\C=1)=2)=3)))
(2<i>E</i>)-oct-2-enoyl-CoA	0.03	-14.72	-14.22	-18.97	-19.01		odd number	di-isomerase-dependent)" // "fatty acid &beta;-oxidation III (unsaturated	odd number)" // "unsaturated	even numbered fatty acid &beta;-oxidation" // "methyl ketone biosynthesis (engineered)" // "fatty acid &beta;-oxidation II (peroxisome)" // "superpathway of glyoxylate cycle and fatty acid degradation"	a medium-chain <i>trans</i>-2,3-dehydroacyl-CoA	InChIKey=CPSDNAXXKWVYIY-NTLMCJQISA-J	CCCCCC=CC(=O)SCCNC(=O)CCNC([C@H](O)C(C)(C)COP([O-])(=O)OP([O-])(=O)OC[C@H]1([C@@H](OP(=O)([O-])[O-])[C@@H](O)[C@@H](O1)N2(C=NC3(C(N)=NC=NC2=3))))=O
kinetin-9-<i>N</i>-glucoside	-7.6	-18.79	-15.11	4.06	-18.79	*	an adenine-type cytokinin glucoside	InChIKey=OYLTWZIEBYEQGY-HMXKMONRSA-N	C([C@@H]1(O[C@@H]([C@@H]([C@H]([C@@H]1O)O)O)N2(C3(N=CN=C(C(N=C2)=3)NCC4(/OC=CC=4)))))O
24-epibrassinolide	-22.07	-21.99	-11.17	-18.29	-18.57	*	a brassinosteroid	InChIKey=IXVMHGVQKLDRKH-FUFWTINHSA-N	CC([C@H]([C@H]([C@@H]([C@@H](C)C2([C@]3(CCC4([C@@]1(C[C@H]([C@H](C[C@@H]1C(=O)OCC([C@H](CC2)3)4)O)O)C))(C)))O)O)C)C
agmatine	-0.44	-18.07	-4.85	-6.17	-18.3		an aliphatic amine	InChIKey=QYPPJABKJHAVHS-UHFFFAOYSA-P	C(CCC[N+])NC(=[N+])N
(2<i>R</i>,3<i>S</i>)-3-isopropylmalate	-13.55	-18	-8.74	1.76	-17.94		a small molecule	InChIKey=RNQHMTFBUSSBJQ-CRCLSJGQSA-L	CC(C)[C@H](C([O-])=O)[C@H](C([O-])=O)O
pelargonidin 3-<i>O</i>-&beta;-<i>D</i>-(caffeoyl)-sambubioside	-12.26	-14.89	-3.32	-14.31	-17.86		an anthocyanidin-3-<i>O</i>-[6-<i>O</i>-(hydroxycinnamoyl)-&beta;-D-glucoside]	InChIKey=JBMPKBPWGYJDNW-YONICNLVSA-N	C6(C=C(O)C(\\O)=C/C(C=CC(=O)OC[C@@H]5(O[C@@H](OC1(/C(=[O+]C2(/C(/C=1)=C(C=C(O)C=2)/[O-]))C3(/C=CC(\\O)=C/C=3)))[C@H](O[C@H]4(OC[C@@H](O)[C@H](O)[C@@H](O)4))[C@@H](O)[C@H](O)5))=6)
<i>N</i>-acetyl-&alpha;-D-galactosamine 1-phosphate	-3.5	-8.31	0.8	2.46	-17.78		an <i>N</i>-acetyl-&alpha;-D-hexosamine 1-phosphate	InChIKey=FZLJPEPAYPUMMR-JAJWTYFOSA-L	CC(N[C@H]1([C@@H](O)[C@@H](O)[C@@H](CO)O[C@H](OP([O-])(=O)[O-])1))=O
indole-3-acetyl-CoA	0.13	-17.78	-0.33	-17.62	-17.74	*	a coenzyme A-activated compound		C1(N=C(C2(N=CN(C(N=1)=2)[C@H]3(O[C@@H]([C@@H](OP(O)(=O)O)[C@@H](O)3)COP(=O)(OP(=O)(OCC(C)(C)[C@@H](O)C(=O)NCCC(=O)NCCSC(=O)CC4(C5(C(NC4)CCCC5)))O)O)))N)
p-aminobenzoate-&beta;-D-glucopyranosyl ester	0.12	-17.75	3.65	-10.23	-17.7		a small molecule	InChIKey=DZWLQKNUQNGEPR-HMUNZLOLSA-N	C([C@H]1([C@@H](O)[C@@H]([C@@H](O)[C@@H](O1)OC(=O)C2(/C=CC(\\N)=C/C=2))O))O
gibberellin A<sub>17</sub>	0.17	-17.35	-0.14	-2.93	-17.44		a gibberellin	InChIKey=AUKMHZZVLPQAOX-CDNFTCFOSA-K	C=C1([C@@]2(O)(C[C@]3(C1)([C@H]([C@H]4([C@@](C)(CCC[C@@](C([O-])=O)([C@@H](CC2)3)4)C([O-])=O))C([O-])=O)))
phenyllactatyl-CoA	0.13	-17.47	-0.13	-17.3	-17.42	*	a small molecule	InChIKey=CHIWZWSEMXNANT-LNSOOWQSSA-J	CC(C)([C@@H](O)C(=O)NCCC(=O)NCCSC(=O)C(O)CC1(CCCCC1))COP(=O)(OP(=O)(OC[C@H]2([C@@H](OP([O-])(=O)[O-])[C@@H](O)[C@@H](O2)N3(C4(N=CN=C(C(N=C3)=4)N))))[O-])[O-]
gibberellin A<sub>34</sub>-catabolite	-0.36	-17.3	4.31	-17.24	-17.37		a gibberellin	InChIKey=ZHUFJGRQVHLFRM-ONBGMUNTSA-L	C=C1([C@@H]2(C[C@]3(C1)([C@H]([C@H]4([C@@](C(=O)[O-])(C)[C@@H](O)C(=O)C=C([C@@H](CC2)3)4))C([O-])=O)))
3-oxo-2-(cis-2'-pentenyl)-cyclopentane-1-butanoyl-CoA	0.02	-17.15	0.28	-16.98	-17.11	*	a coenzyme A-activated compound	InChIKey=YYUZYSVPFVOYLB-RGUWMICCSA-J	CCC=CC[C@@H]1([C@H](CCC(=O)1)CCCC(=O)SCCNC(=O)CCNC(=O)[C@H](O)C(C)(C)COP(=O)(OP(=O)(OC[C@H]2([C@@H](OP([O-])(=O)[O-])[C@@H](O)[C@@H](O2)N3(C4(N=CN=C(C(N=C3)=4)N))))[O-])[O-])
3-oxo-2-(cis-2'-pentenyl)-cyclopentane-1-(3-oxobutanoyl)-CoA	-2.74	-17.09	0.32	-16.93	-17.05	*	a coenzyme A-activated compound	InChIKey=QGJLCXXJEFRWHP-JQUKJZMASA-J	CCC=CC[C@@H]1([C@H](CCC(=O)1)CC(=O)CC(=O)SCCNC(=O)CCNC(=O)[C@H](O)C(C)(C)COP(=O)(OP(=O)(OC[C@H]2([C@@H](OP([O-])(=O)[O-])[C@@H](O)[C@@H](O2)N3(C4(N=CN=C(C(N=C3)=4)N))))[O-])[O-])
ternatin C3	-2.59	-17.05	-2.76	-16.89	-17.01	*	an anthocyanin	InChIKey=HRUUEDKBMVPXJT-MJHFZXDWSA-L	C(O)[C@H]1(O[C@H]([C@@H](O)[C@H](O)[C@@H](O)1)OC5(\\C=C(C3(=[O+]C4(/C=C([O-])C=C([O-])C(/C=C(O[C@@H]2(O[C@H](COC(CC([O-])=O)=O)[C@@H](O)[C@H](O)[C@@H](O)2))3)=4)))C=C(C(/O)=5)O[C@H]6(O[C@H]([C@H](O)[C@@H](O)[C@H](O)6)COC(=O)C=CC7(C=CC(\\O)=C/C=7))))
2-sinapoyloxy-3-butenylglucosinolate	0.42	-14.17	0.3	-8.04	-17.01		a small molecule	InChIKey=WJTPNROZULSXGJ-NILQQRRASA-M	C=CC(OC(=O)C=CC1(C=C(OC)C(/O)=C(C=1)/OC))CC(=NOS(=O)(=O)[O-])S[C@H]2(O[C@H](CO)[C@@H](O)[C@H](O)[C@@H](O)2)
(+)-gallocatechin	-17.09	-17	4.01	-1.26	-16.96	*	3-<i>trans</i>-flavanols biosynthesis"	a (2<i>R</i>,3<i>S</i>)-flavan-3-ol	InChIKey=XMOCLSLCDHWDHP-SWLSCSKDSA-N	C3(\\C(/O)=C(C(\\O)=C/C(\\[C@@H]1(OC2(/C(/C[C@H](O)1)=C(C=C(O)C=2)/O)))=3)/O)
3&beta;-hydroxy-&beta;-cyclocitral	-4.52	-16.62	8.96	-8.96	-16.58	*	an apocarotenoid	InChIKey=SWPMTVXRLXPNDP-MRVPVSSYSA-N	CC1(\\C[C@@H](O)CC(C)(C)C(\\C=O)=1)
1-(methylsulfanyl)-4-<i>aci</i>-nitrobutane	-13.06	-12.67	5.47	-16.41	-16.53		a 1-(methylsulfanyl)-n-<i>aci</i>-nitroalkane	InChIKey=KZCTZQMFYMYSGR-UHFFFAOYSA-N	CSCCCC=[N+](O)[O-]
4-(2'-carboxyphenyl)-4-oxobutyryl-CoA	4.56	-16.27	0.02	-16.27	-16.27	*	4-dihydroxy-2-naphthoate biosynthesis II (plants)"	a small molecule	InChIKey=KVAQAPQXOXTRAE-HSJNEKGZSA-I	CC(C)([C@@H](O)C(=O)NCCC(=O)NCCSC(CCC(C1(\\C=CC=CC(/C([O-])=O)=1))=O)=O)COP(=O)(OP(=O)(OC[C@@H]2(O[C@H]([C@@H]([C@@H]2OP([O-])(=O)[O-])O)N3(C4(N=CN=C(N)C(N=C3)=4))))[O-])[O-]
3'-deoxyadenosine 5'-monophosphate	8.58	-16.04	8.38	-15.87	-15.99	*	a nucleic acid component	InChIKey=XKFCKNDXVMFENB-BAJZRUMYSA-L	C([C@H]3(C[C@@H](O)[C@H](N1(C2(N=CN=C(C(N=C1)=2)N)))O3))OP([O-])([O-])=O
guaiacol	-4.49	-15.87	7.79	-7.64	-15.83		a guaiacol	InChIKey=LHGVFZTZFXWLCP-UHFFFAOYSA-N	COC1(\\C=CC=CC(/O)=1)
benzyl acetate	-7.86	-23.5	0.27	-15.92	-15.57		an acetyl ester	InChIKey=QUKGYYKBILRGFE-UHFFFAOYSA-N	CC(OCC1(/C=CC=CC=1))=O
<i>N</i>-hydroxyhomomethionine	-18.79	-1.8	-18.89	-8.38	-15.55	*	an L-<i>N</i>-hydroxypolyhomomethionine	InChIKey=ICWHQHNAQWNMTM-YFKPBYRVSA-M	CSCCC[C@@H](C([O-])=O)NO
phenylarsenious oxide	-5.85	-15.05	-15.09	-15.05	-15.05	*	a small molecule	InChIKey=BQVCCPGCDUSGOE-UHFFFAOYSA-N	C1(/C=CC(\\[As]=O)=C/C=1)
decanoyl-CoA	-9.12	-15.02	2.86	-14.85	-14.97	*	a medium-chain 2,3,4-saturated fatty acyl CoA	InChIKey=CNKJPHSEFDPYDB-HSJNEKGZSA-J	CCCCCCCCCC(=O)SCCNC(=O)CCNC(=O)[C@H](O)C(C)(C)COP(=O)(OP(=O)(OC[C@H]1([C@@H](OP([O-])(=O)[O-])[C@@H](O)[C@@H](O1)N2(C3(N=CN=C(C(N=C2)=3)N))))[O-])[O-]
luteolin 7-<i>O</i>-&beta;-D-diglucuronide	2.77	-14.89	-14.99	-14.89	-14.89	*	a small molecule	InChIKey=PBBVWJQPAZYQDB-DBFWEQBMSA-L	C([C@@H]5(O[C@@H](O[C@H]1([C@H]([C@@H]([C@@H](C([O-])=O)O[C@H]1OC4(/C=C3(C(/C(C=C(C2(/C=C(C(\\O)=C/C=2)O))O3)=O)=C(C=4)/O)))O)O))[C@@H]([C@H]([C@@H]5O)O)O))([O-])=O
<i>N</i>-feruloyltyramine	-15.02	-14.93	7.96	-14.77	-14.89		an amide	InChIKey=NPNNKDMSXVRADT-WEVVVXLNSA-N	COC1(\\C=C(C=CC(/O)=1)C=CC(NCCC2(/C=CC(\\O)=C/C=2))=O)
isovitexin-7-O-xyloside	-14.89	-14.8	3.76	-14.64	-14.76	*	a flavone	InChIKey=YWTMOKNFGZQLRN-XKDPPCGASA-N	C(O)[C@@H]1(O[C@H]([C@H](O)[C@@H](O)[C@H](O)1)C5(\\C(/O)=C3(C(\\OC(\\C2(/C=CC(\\O)=C/C=2))=C/C3=O)=C/C(\\O[C@H]4(OC[C@@H](O)[C@H](O)[C@@H](O)4))=5)))
3'-dephospho-CoA	-6.44	-20.44	-13.7	-20.38	-14.23		a coenzyme A-activated compound	InChIKey=KDTSHFARGAKYJN-IBOSZNHHSA-L	CC(C)(COP([O-])(=O)OP([O-])(=O)OC[C@@H]1(O[C@H]([C@H](O)[C@H](O)1)N2(C=NC3(C(N)=NC=NC2=3))))[C@@H](O)C(=O)NCCC(=O)NCCS
<i>N</i>-acetyl-&alpha;-D-glucosamine 1-phosphate	-14.35	-14.26	1.24	6.02	-14.22		an <i>N</i>-acetyl-&alpha;-D-hexosamine 1-phosphate	InChIKey=FZLJPEPAYPUMMR-FMDGEEDCSA-L	CC(=O)N[C@H]1([C@@H](O)[C@H](O)[C@@H](CO)O[C@H](OP(=O)([O-])[O-])1)
4&alpha;,14&alpha;-dimethyl-porifersta-8,25(27)-dienol	-11.02	-14.25	-0.21	-10.48	-14.21		a small molecule	InChIKey=UULZCTIPCNJXAT-HRAIJHJPSA-N	CC[C@H](C(C)=C)CC[C@@H](C)[C@@H]2(CC[C@@]3(C)(C4(/CC[C@@H]1([C@H](C)[C@@H](O)CC[C@@](C)1C(/CC[C@](C)23)=4))))
2,3',4,6-tetrahydroxybenzophenone	0.16	-21.06	0.22	-14.09	-14.2		a small molecule	InChIKey=QWRYPHZJTWQLFX-UHFFFAOYSA-N	C2(/C=C(C=C(C(C1(\\C(\\O)=C/C(\\O)=C/C(/O)=1))=O)C=2)O)
(2E)-2-butylidene-4-hydroxy-5-methyl-3(2H)-furanone	3.29	-14.17	0.05	-14.03	-14.13		an aldehyde or ketone	InChIKey=JJPKPKGALPXILL-FNORWQNLSA-N	CCCC=C1(C(=O)C(\\O)=C(C)/O1)
L-willardiine	-14.21	-14.13	-10.69	3.84	-14.08	*	a modified amino acid	InChIKey=FACUYWPMDKTVFU-BYPYZUCNSA-N	C([C@H]([N+])C(=O)[O-])N1(C=CC(=O)NC1=O)
cyanidin 3-<i>O</i>-[2\-<i>O</i>-(xylosyl)-6\"-<i>O</i>-(p-coumaroyl) glucoside] 5-<i>O</i>-malonylglucoside"	3	-14.12	2.78	-13.95	-14.07	*	an anthocyanin	InChIKey=JKGXHHXZZLNEGD-XINMMMEUSA-O	C(OC(=O)CC(=O)O)[C@H]7([C@@H](O)[C@H](O)[C@@H](O)[C@H](OC5(/C=C(O)C=C4([O+]=C(C(\\O[C@H]2(O[C@@H]([C@@H](O)[C@H](O)[C@@H](O[C@H]1(OC[C@@H](O)[C@H](O)[C@@H](O)1))2)COC(C=CC3(C=CC(\\O)=C/C=3))=O))=C/C\\4=5)C6(/C=CC(/O)=C(C=6)/O))))O7)
(+)-sesaminol	-6.97	-17.39	3.58	-3.22	-13.98		a lignan	InChIKey=KQRXQIPRDKVZPW-ISZNXKAUSA-N	C1(OC6(/C(\\O1)=C/C=C([C@@H]2(OC[C@@H]3([C@H](OC[C@H]23)C4(/C(\\O)=C/C5(/OCOC(\\C=4)=5)))))C=6))
(13<i>E</i>)-labda-7,13-dien-15-ol	-21.12	-14.18	-10.28	-6.07	-13.97		a diterpenoid	InChIKey=KPOGKOXAZMFZNM-ATPOGHATSA-N	CC(\\CC[C@@H]2(C(\\C)=C/C[C@@H]1([C@@](CCC[C@]1(C)2)(C)C)))=C/CO
3-hydroxy-L-kynurenine	1.15	2.06	1.27	0.33	-13.89	*	a hydroxy-L-amino acid	InChIKey=VCKPUUFAIGNJHC-LURJTMIESA-N	C([O-])(=O)[C@@H]([N+])CC(=O)C1(\\C=CC=C(O)C(/N)=1)
1-18:2-2-16:0-monogalactosyldiacylglycerol	-18.74	-18.66	3.37	-9.55	-13.86		lower eukaryotes)" // "icosapentaenoate biosynthesis I (lower eukaryotes)" // "docosahexaenoate biosynthesis I (lower eukaryotes)" // "linoleate biosynthesis I (plants)" // "dimorphecolate biosynthesis" // "hydroxylated fatty acid biosynthesis (plants)" // "glycolipid desaturation"	monogalactosyldiacylglycerol-34:2	InChIKey=QOCWWAJCODFCIV-OSTDEYQUSA-N	CCCCCC=CCC=CCCCCCCCC(OC[C@H](CO[C@H]1(O[C@@H]([C@@H]([C@@H]([C@H]1O)O)O)CO))OC(CCCCCCCCCCCCCCC)=O)=O
7'-hydroxyabscisate	-17.2	-17.26	-20.64	-20.52	-13.79		an abscisic acid derivative	InChIKey=ZGHRCSAIMSBFLK-IQSISOBESA-M	CC(/C=C[C@]1(C(C)(C)CC(=O)C=C(CO)1)O)=C/C([O-])=O
1-(methylsulfanyl)-8-<i>aci</i>-nitrooctane	-13.73	-13.65	7.15	-13.48	-13.6	*	a 1-(methylsulfanyl)-n-<i>aci</i>-nitroalkane	InChIKey=LXZOOYJPYFVQFL-UHFFFAOYSA-N	CSCCCCCCCC=[N+](O)[O-]
vellosimine	-6.97	-13.6	-3.54	4.66	-13.6	*	a small molecule	InChIKey=MHASSCPGKAMILD-PQKPIAESSA-N	CC=C5(CN1([C@@H]2(C[C@H]([C@@H](C=O)[C@@H]1CC3(/C4(\\C=CC=CC(/NC\\2=3)=4)))5)))
kaempferol 3-<i>O</i>-(4\	6\"-<i>O</i>-di-<i>p</i>-coumaroyl)-glucoside"	3.43	-13.43	6.69	-2.42	-13.37	flavonol acylglucoside biosynthesis I - kaempferol derivatives // "flavonol glucosylation I"	a flavonol derivative	InChIKey=JYRGUBRIXDOXKK-GFKRHWKYSA-N	C(OC[C@@H]5(O[C@@H](OC2(/C(=O)C3(\\C(\\OC(/C1(/C=CC(\\O)=C/C=1))=2)=C/C(\\O)=C/C(/O)=3)))[C@H](O)[C@@H](O)[C@H](OC(=O)C=CC4(C=CC(\\O)=C/C=4))5))(=O)C=CC6(C=CC(\\O)=C/C=6)
gardenin B	-8.67	-13.15	8.83	8.92	-13.14		a methoxyflavone // "a monohydroxyflavone"	InChIKey=LXEVSYZNYDZSOB-UHFFFAOYSA-N	COC3(/C=CC(\\C1(/OC2(\\C(/OC)=C(C(/OC)=C(C(/C(=O)C=1)=2)/O)/OC)))=C/C=3)
scoparone	-13.14	-13.05	6.77	-12.89	-13.01	*	a coumarin		C1(C=CC2(/C(\\O1)=C/C(/OC)=C(C=2)/OC))(=O)
5,6-epoxy-3-hydroxy-9-apo-&beta;-caroten-9-one		-12.41	0.16	-24.53	-12.41	*	a 9-apo-carotenone	InChIKey=VYKLRWGPNUVKNC-AATRIKPKSA-N	CC(C=CC12(C(CC(CC1(O2)C)O)(C)C))=O
delphinidin 3-<i>O</i>-rutinoside-7-<i>O</i>-(6-<i>O</i>-(p-hydroxybenzoyl)-glucoside)	-12.53	-6.95	5.71	-12.31	-12.41	*	an anthocyanidin-3-<i>O</i>-&beta;-D-glucoside	InChIKey=LMJXQDNIBLCFED-XPOHUVJOSA-N	C[C@H]7([C@@H](O)[C@H](O)[C@H](O)[C@H](OC[C@H]1([C@@H](O)[C@H](O)[C@@H](O)[C@@H](O1)OC3(/C(C2(/C=C(O)C(/O)=C(C=2)/O))=[O+]C6(/C(/C=3)=C(C=C(O[C@H]5(O[C@H](COC(=O)C4(/C=CC(\\O)=C/C=4))[C@@H](O)[C@H](O)[C@@H](O)5))C=6)/[O-]))))O7)
quercetin 3-<i>O</i>-&beta;-<i>D</i>-glucosyl-(1->2)-glucosyl-(1->2)-&beta;-<i>D</i>-glucoside	-12.34	-12.26	5.84	-12.09	-12.21		a flavonol 3-<i>O</i>-(&beta;-D-glucosyl-(1->2)-&beta;-D-glucosyl (1->2)-&beta;-D-glucoside)	InChIKey=IQBMWEYFKNVACH-MEBVLIOMSA-N	C(O)[C@@H]3(O[C@H]([C@H](O[C@H]2(O[C@H](CO)[C@@H](O)[C@H](O)[C@@H](O[C@@H]1([C@@H]([C@H]([C@H](O)[C@H](O1)CO)O)O))2))[C@@H](O)[C@H](O)3)OC5(/C(C6(\\C(\\O)=C/C(\\O)=C/C(/OC(/C4(/C=CC(/O)=C(C=4)/O))=5)=6))=O))
selenodiglutathione	-3.57	-12.08	-6.24	-12.08	-12.08		glutathione and derivatives	InChIKey=GJEZZQVPWMCGSB-BJDJZHNGSA-L	C(S[Se]SC[C@@H](C(NCC([O-])=O)=O)NC(=O)CC[C@H]([N+])C([O-])=O)[C@@H](C(NCC([O-])=O)=O)NC(=O)CC[C@H]([N+])C([O-])=O
(2E)-4-hydroxy-5-methyl-2-propylidene-3(2H)-furanone	12.06	-4.68	-8.12	10.98	-12		an aldehyde or ketone	InChIKey=JPLUXSIYIQGVTD-GQCTYLIASA-N	CCC=C1(C(=O)C(\\O)=C(C)/O1)
5-phospho-&alpha;-D-ribose 1-diphosphate	-0.25	-11.88	-5.83	-11.88	-11.88		a sugar phosphate	InChIKey=PQGCEDQWHSBAJP-TXICZTDVSA-I	C(OP(=O)([O-])[O-])[C@@H]1(O[C@H](OP([O-])(=O)OP([O-])(=O)[O-])[C@H](O)[C@H](O)1)
delphinidin 3-<i>O</i>-glucosyl-5-<i>O</i>-caffeoylglucoside	-8.94	-14.92	2.63	-14.76	-11.73		an anthocyanidin 3,5-di-<i>O</i>-&beta;-D-glucoside	InChIKey=IKPXCKVGTSPZDV-KKDWAMKNSA-N	C(O)[C@H]6([C@@H](O)[C@H](O)[C@@H](O)C(OC4(/C(C1(/C=C(O)C(/O)=C(C=1)/O))=[O+]C5(/C=C([O-])C=C(OC3([C@H](O)[C@@H](O)[C@H](O)[C@@H](COC(=O)C=CC2(C=CC(/O)=C(C=2)/O))O3))C(/C=4)=5)))O6)
<i>N</i><sup>6</sup>-(&Delta;<sup>2</sup>-isopentenyl)-adenosine 5'-diphosphate		-14.57	0.33	-17.25	-11.71		a small molecule	InChIKey=VXMXKDAHJURHEN-SDBHATRESA-K	CC(C)=CCNC2(=NC=NC3(N([C@@H]1([C@@H]([C@@H]([C@H](O1)COP(OP(=O)([O-])[O-])([O-])=O)O)O))C=NC2=3))
methyl (<i>2E,6E</i>)-farnesoate	-11.82	-11.74	8.09	-11.69	-11.69	*	a methyl farnesoate	InChIKey=NWKXNIPBVLQYAB-VDQVFBMKSA-N	CC(C)=CCCC(/C)=C/CCC(/C)=C/C(=O)OC
cisplatin	-2.98	-11.58	-8.49	-11.58	-11.58		a small molecule		Cl[Pt++](.N)(.N)Cl
(3E)-phytochromobilin	-11.38	-22.49	-22.44	-18.7	-11.54		a phytochromobilin	InChIKey=DKMLMZVDTGOEGU-UAWLBFNISA-L	CC=C1([C@@H](C)C(NC\\1=C/C4(/NC(\\C=C2(C(\\CCC([O-])=O)=C(C)/C(=N2)C=C3(C(\\C)=C(C=C)/C(=O)N3)))=C(CCC([O-])=O)/C(\\C)=4))=O)
4,5-dihydroxyisophthalate	-0.15	-11.43	-5.66	-11.43	-11.43		a small molecule	InChIKey=FBOCZYIJDQZQFE-UHFFFAOYSA-L	C(=O)([O-])C1(/C=C(C(=O)[O-])C(/O)=C(C=1)/O)
paraxanthine	3.59	-11.49	-15.12	-11.2	-11.35		a small molecule	InChIKey=QUNWUDVFRNGTCO-UHFFFAOYSA-N	CN1(C=NC2(\\NC(N(C(C/1=2)=O)C)=O))
tetraphosphate	-2.66	-11.34	-11.35	-11.34	-11.34		a polyphosphate	InChIKey=YDHWWBZFRZWVHO-UHFFFAOYSA-H	[O-]P(OP(=O)(OP([O-])(=O)OP(=O)([O-])[O-])[O-])([O-])=O
(6&alpha;<i>S</i>,11&alpha;<i>S</i>)-4-dimethylallyl-3,6&alpha;,9-trihydroxypterocarpan	13.06	2.5	-7.43	-10.97	-11.04		a small molecule	InChIKey=NLHMQOCIFRDSNU-VQTJNVASSA-N	CC(C)=CCC3(\\C4(/OC[C@]1(O)([C@@H](OC2(/C1=CC=C(O)C=2))C(\\C=CC(\\O)=3)=4)))
(2E,5Z)-tetradecenoyl-CoA	-11.16	-11.08	-11.07	-10.91	-11.04	*	a coenzyme A-activated compound	InChIKey=JVEFYXPCQBMMAA-ZMLWRGBOSA-J	CCCCCCCCC=CCC=CC(SCCNC(=O)CCNC(=O)[C@H](O)C(C)(C)COP(=O)(OP(=O)(OC[C@H]1([C@@H](OP([O-])(=O)[O-])[C@@H](O)[C@@H](O1)N2(C3(N=CN=C(C(N=C2)=3)N))))[O-])[O-])=O
salutaridinol	-3.37	-10.92	-0.09	-10.84	-10.92		a small molecule	InChIKey=LLSADFZHWMEBHH-TYILLQQXSA-O	C[N+]3(CC[C@]14(C=C(OC)[C@@H](O)C=C([C@@H](CC2(/C1=C(O)C(\\OC)=C/C=2))3)4))
(11Z,14Z,17Z)-3-oxoicosatrienoyl-CoA	-11.01	-3.87	10.26	-3.88	-10.88		a coenzyme A-activated compound	InChIKey=DFYFQQXXTCLFNG-UBQHHBPXSA-J	CCC=CCC=CCC=CCCCCCCCC(=O)CC(=O)SCCNC(=O)CCNC(=O)[C@H](O)C(C)(C)COP(=O)(OP(=O)(OC[C@H]1([C@@H](OP([O-])(=O)[O-])[C@@H](O)[C@@H](O1)N2(C3(N=CN=C(C(N=C2)=3)N))))[O-])[O-]
lactucaxanthin	-9.71	-10.35	-0.17	-19.36	-10.85		a xanthophyll	InChIKey=BIPAHAFBQLWRMC-SUOWZELTSA-N	CC(\\C=CC=C(C)C=C[C@H]1(C(C)(C)C[C@@H](O)C=C(C)1))=C/C=CC=C(C)C=CC=C(C)C=C[C@H]2(C(C)(C)C[C@@H](O)C=C(C)2)
(<i>R</i>)-pantothenate	-4.09	-14.5	5.66	0.79	-10.61	*	a small molecule	InChIKey=GHOKWGTUZJEAQD-ZETCQYMHSA-M	CC(C)(CO)[C@@H](O)C(=O)NCCC(=O)[O-]
purine	-0.29	-10.64	8.85	-6.78	-10.6		a purine base	InChIKey=KDCGOANMDULRCW-UHFFFAOYSA-N	C1(=NC=NC2(/NC=NC/1=2))
prephytoene diphosphate	-10.63	-6.49	11.49	-10.38	-10.5		a small molecule	InChIKey=RVCNKTPCHZNAAO-IMSLGMFESA-K	CC(C)=CCCC(/C)=C/CCC(/C)=C/CCC(/C)=C/[C@H]1([C@@](CCC=C(CCC=C(CCC=C(C)C)C)C)([C@H]1COP(OP(=O)([O-])[O-])([O-])=O)C)
&alpha;-L-rhamnopyranose	-14.15	-21.18	-21.13	-21.01	-10.15		L-rhamnopyranose	InChIKey=SHZGCJCMOBCMKK-HGVZOGFYSA-N	C[C@@H]1([C@@H]([C@H]([C@H]([C@@H](O1)O)O)O)O)
4-nitrobenzaldehyde	-13.18	-9.76	6.05	-13.02	-10.08		a C-nitro compound // "an aromatic aldehyde"	InChIKey=BXRFQSNOROATLV-UHFFFAOYSA-N	C(=O)C1(/C=CC(\\[N+]([O-])=O)=C/C=1)
podophyllotoxin 7-glucoside	-10.17	-10.09	3.49	-9.92	-10.05		a lignan	InChIKey=NXVJTGLCCSFGAT-KHBXQNFESA-N	COC1(\\C=C(C=C(C(/OC)=1)OC)[C@H]2(C5(/C(\\[C@H](C3(C2C(OC3)=O))O[C@@H]4([C@@H]([C@H]([C@H](O)[C@H](O4)CO)O)O))=C/C6(/OCOC(\\C=5)=6))))
cyanidin 3-<i>O</i>-(6-<i>O</i>-&beta;-D-glucosyl-2-<i>O</i>-&beta;-D-xylosyl-&beta;-D-galactoside)	3.48	-10.03	-10.02	-9.99	-9.99		an anthocyanin	InChIKey=RAHCBDLMLRVOBZ-CJZFFMGXSA-N	C(O)[C@H]1([C@@H](O)[C@H](O)[C@@H](O)[C@@H](O1)OC[C@H]3([C@@H](O)[C@H](O)[C@@H](O[C@H]2(OC[C@@H](O)[C@H](O)[C@@H](O)2))[C@@H](O3)OC5(/C(C4(/C=C(O)C(\\O)=C/C=4))=[O+]C6(/C(/C=5)=C(C=C(O)C=6)/[O-]))))
2'-deoxycytidine 3'-monophosphate	-10.05	-9.97	-3.44	7.04	-9.92		a pyrimidine 2'-deoxyribonucleoside 3'-monophosphate // "a 2'-deoxyribonucleoside 3'-monophosphate"	InChIKey=FVSAHFFHPOLBLL-SHYZEUOFSA-L	C1(/C(N)=NC(=O)N(C=1)[C@@H]2(C[C@H](OP([O-])(=O)[O-])[C@@H](CO)O2))
bisdemalonylsalvianin	-9.94	-9.86	6.68	-9.81	-9.86		an anthocyanidin 3,5-di-<i>O</i>-&beta;-D-glucoside	InChIKey=MLLMLJXCGLXOIJ-AQAMAIGXSA-N	C(O)[C@H]6([C@H]([C@@H]([C@H]([C@H](OC3(/C4(/C=C(O[C@@H]2([C@H](O)[C@@H](O)[C@H](O)[C@@H](COC(=O)C=CC1(C=C(O)C(\\O)=C/C=1))O2))C(=[O+]C(/C=C(C=3)[O-])=4)C5(/C=CC(\\O)=C/C=5))))O6)O)O)O)
D-glucono-1,5-lactone	-0.13	-19.98	0.23	-16.54	-9.74	*	a &delta;-lactone	InChIKey=PHOQVHQSTUBQQK-SQOUGZDYSA-N	C([C@@H]1(OC([C@@H]([C@H]([C@@H]1O)O)O)=O))O
quercetin 3-<i>O</i>-(3',6\-<i>O</i>-di-<i>p</i>-coumaroyl)-glucoside"	-13.25	-13.16	6.85	-10.19	-9.51	*	a flavonol derivative	InChIKey=RMWPNUYFHAPTBJ-NRDVXICOSA-N	C(OC[C@@H]5(O[C@@H](OC2(/C(=O)C3(\\C(\\OC(/C1(/C=C(O)C(\\O)=C/C=1))=2)=C/C(\\O)=C/C(/O)=3)))[C@H](O)[C@@H](OC(=O)C=CC4(C=CC(\\O)=C/C=4))[C@H](O)5))(=O)C=CC6(C=CC(\\O)=C/C=6)
fluorofumarate	-6.47	-9.38	-9.43	-9.18	-9.37		a small molecule	InChIKey=OISKHJXTRQPMQT-UPHRSURJSA-N	C(=O)(O)C=C(F)C(=O)O
4-methyl-5-(2-phosphooxyethyl)thiazole	-6.32	-9.25	-6.2	-9.25	-9.25		a thiazole	InChIKey=OCYMERZCMYJQQO-UHFFFAOYSA-L	CC1(/N=CSC(\\CCOP([O-])(=O)[O-])=1)
quercetin-3,3'-bissulfate	2.48	-9.25	-3.18	-9.25	-9.25		a small molecule	InChIKey=CVENNDDRCHLONB-UHFFFAOYSA-K	C3(/C(\\C1(\\OC2(/C(/C(C(\\OS(=O)(=O)[O-])=1)=O)=C(C=C([O-])C=2)/O)))=C/C(/OS(=O)([O-])=O)=C(C=3)/O)
thenoyl trifluoro acetone	-9.36	-9.24	-6.21	-9.24	-9.24		a small molecule	InChIKey=UGHMGUXSEYFBLC-DAXSKMNVSA-M	C1(/C=C(SC=1)C(=O)C=C([O-])C(F)(F)F)
(<i>R</i>)-3-hydroxyoctanoyl-CoA	0.09	-9.23	-0.16	-9.23	-9.23	*	even numbered fatty acid &beta;-oxidation" // "sphingolipid biosynthesis (plants)" // "CDP-diacylglycerol biosynthesis I" // "phosphatidylglycerol biosynthesis II (non-plastidic)" // "superpathway of phospholipid biosynthesis II (plants)" // "phosphatidylcholine acyl editing" // "triacylglycerol biosynthesis (Chlamydomonas)" // "diacylglycerol and triacylglycerol biosynthesis" // "6-gingerol anal…	a medium-chain (3<i>R</i>)-3-hydroxyacyl-CoA	InChIKey=ATVGTMKWKDUCMS-JWBYWSJJSA-J	CCCCC[C@H](CC(SCCNC(=O)CCNC(=O)[C@H](O)C(C)(C)COP(=O)(OP(=O)(OC[C@H]1([C@@H](OP([O-])(=O)[O-])[C@@H](O)[C@@H](O1)N2(C3(N=CN=C(C(N=C2)=3)N))))[O-])[O-])=O)O
gossypetin 7-<i>O</i>-glucoside	-0.34	-0.58	-3.99	-0.05	-9.14		a flavonol	InChIKey=ATRBFJXIWFCIMW-ZGNDCXKCSA-M	C4(\\C=C(C(\\O)=C/C(\\C1(\\OC2(\\C(/C(C(\\[O-])=1)=O)=C(C=C(C(/O)=2)O[C@@H]3([C@@H]([C@H]([C@H](O)[C@H](O3)CO)O)O))/O)))=4)O)
cibacron blue 3GA	2.89	-9.11	-9.1	-9.11	-9.11		a dye	InChIKey=YKCWQPZFAFZLBI-UHFFFAOYSA-K	C5(N=C(NC4(\\C=CC(\\NC1(/C2(/C(C3(/C(\\C(C(\\C(/N)=C(C=1)/S([O-])(=O)=O)=2)=O)=C/C=CC=3))=O)))=C/C(/S([O-])(=O)=O)=4))N=C(N=5)NC6(/C(\\S(=O)(=O)[O-])=C/C=CC=6))Cl
2'-methoxythiamine pyrophosphate	-8.95	-8.85	-8.85	-8.85	-8.85		a small molecule	InChIKey=PWBCVHDHRGCQHM-UHFFFAOYSA-L	CC1(/[N+](=CSC(\\CCOP(=O)([O-])OP(=O)([O-])[O-])=1)CC2(/C(N)=NC(OC)=NC=2))
BPH-700	-2.9	-8.8	-2.72	-8.8	-8.8		a small molecule	InChIKey=LBNUOQAEVSXSSE-UHFFFAOYSA-K	C(S(O[K])(=O)=O)(P(=O)(O[K])O[K])CCCC2(/C=CC(\\C1(/C=CC=CC=1))=C/C=2)
uroporphyrin I	0.7	-8.66	0.42	-8.66	-8.66	*	a porphyrin	InChIKey=ZRUDAKXKJCGVKT-JRHDEHKPSA-F	C(C5(/C3(/N=C(C=C4(N=C(C=C1(C(\\CCC([O-])=O)=C(CC([O-])=O)/C(=N1)C=C2(C(\\CCC(=O)[O-])=C(CC([O-])=O)/C(=N2)C=3)))C(\\CC(=O)[O-])=C(CCC(=O)[O-])/4))C(\\CC([O-])=O)=5)))CC(=O)[O-]
4-nitrophenyl phosphate	0.01	-8.64	-5.02	-2.63	-8.64		a C-nitro compound	InChIKey=XZKIHKMTEMTJQX-UHFFFAOYSA-L	C1(/C(\\[N+]([O-])=O)=C/C=C(C=1)OP([O-])(=O)[O-])
4-amino-2,6-dinitrotoluene glucoside	5.43	-9.69	7.33	7.05	-8.61		a C-nitro compound // "an aromatic compound"	InChIKey=YGGQRUODYYKCTL-HENWMNBSSA-N	CC2(\\C(\\[N+](=O)[O-])=C/C(\\NC1(O[C@H](CO)[C@@H](O)[C@H](O)[C@@H](O)1))=C/C(\\[N+]([O-])=O)=2)
(-)-heliannuol E	-8.73	-8.65	-8.64	-8.61	-8.61		a sesquiterpenoid		CC1(/C(\\O)=C/C2([C@@H](C=C)C[C@H]([C@@](C)(O)C)OC(C=1)=2))
(1Z,2S)-2-methylbutanal oxime	-8.72	-8.63	12.27	2.53	-8.56		an aldoxime	InChIKey=SEWWFHKIKWFJNV-YIWIKUPCSA-N	CC[C@H](C)C=NO
2-bromoacetyl CoA	9.41	-8.54	-5.65	-2.42	-8.54		a coenzyme A-activated compound	InChIKey=RNBXHSPQPNFOKA-GRFIIANRSA-J	CC(C)([C@@H](O)C(=O)NCCC(=O)NCCSC(=O)CBr)COP(=O)(OP(=O)(OC[C@H]1([C@@H](OP([O-])(=O)[O-])[C@@H](O)[C@@H](O1)N2(C3(N=CN=C(C(N=C2)=3)N))))[O-])[O-]
2,3-dimercaptopropan-1-ol	-2.82	-8.43	-5.59	-8.43	-8.43		a small molecule	InChIKey=WQABCVAJNWAXTE-UHFFFAOYSA-N	C(O)C(S)CS
3'-phosphoadenylyl-sulfate	-5.73	-8.41	-8.41	-8.41	-8.41		a small molecule	InChIKey=GACDQMDRPRGCTN-KQYNXXCUSA-J	C([C@H]3([C@H]([C@H]([C@H](N1(C2(N=CN=C(C(N=C1)=2)N)))O3)O)OP(=O)([O-])[O-]))OP(OS([O-])(=O)=O)([O-])=O
dTTP	-5.7	-8.39	-8.39	-8.39	-8.39		a pyrimidine 2'-deoxyribonucleoside 5'-triphosphate // "a pyrimidine"	InChIKey=NHVNXKFIZYSCEB-XLPZGREQSA-J	CC1(/C(=O)NC(=O)N(C=1)[C@@H]2(C[C@H](O)[C@@H](COP(=O)([O-])OP(=O)([O-])OP(=O)([O-])[O-])O2))
methyl gibberellin A<sub>9</sub>	-8.5	-8.37	-8.41	16.16	-8.37		a gibberellin	InChIKey=GKRMJALKMNRHGF-WARWBDHMSA-N	C=C3([C@H]2(CC[C@@H]4([C@@]15(CCC[C@@]([C@H]1[C@@H]([C@](C2)(C3)4)C(OC)=O)(C)C(O5)=O))))
artemisinate	-8.47	-8.34	-3.95	4.34	-8.34		a sesquiterpenoid // "an aldehyde"	InChIKey=PLQMEXSCSAIXGB-SAXRGWBVSA-M	CC2(/CC[C@H]1([C@@H]([C@H](C(C([O-])=O)=C)CC[C@@H](C)1)C=2))
ATP&gamma;S	-2.78	-8.32	-5.23	-8.32	-8.32		a small molecule	InChIKey=NLTUCYMLOPLUHL-KQYNXXCUSA-J	C([C@H]3([C@H]([C@H]([C@H](N1(C2(N=CN=C(C(N=C1)=2)N)))O3)O)O))OP(OP(=O)([O-])OP(=S)([O-])[O-])([O-])=O
(2<i>E</i>,6<i>E</i>,10<i>E</i>,14<i>E</i>,18<i>E</i>)-lycopapentaene	-2.73	-8.2	-8.22	-8.2	-8.2		a hydrocarbon // "a tetraterpenoid"	InChIKey=UKCLJWRKPGPSLL-NGXRMTJOSA-N	CC(C)=CCCC(/C)=C/CCC(/C)=C/CCC(/C)=C/CCC=C(C)CCC[C@H](C)CCC[C@H](C)CCCC(C)C
urushiol quinone	0.04	-8.03	-4.1	-8.03	-8.03		an aromatic compound		C=CCCC=CC=CCCCCCCCC1(/C(/O)=C(C=C(C=1)C(C=CC=CC=CC)CCCCCCCC2(\\C=CC=C(O)C(\\O)=2))/O)
(22<i>S</i>,24<i>R</i>)-22-hydroxy-5&alpha;-ergostan-3-one	3.77	-7.88	6.82	2.59	-7.88		a brassinosteroid	InChIKey=XGIZPVUTLMXXTK-VNSZYHACSA-N	CC(C)[C@H](C)C[C@H](O)[C@@H](C)[C@@H]3(CC[C@@H]4([C@H]2(CC[C@@H]1(CC(=O)CC[C@@](C)1[C@H]2CC[C@](C)34))))
ergosta-5,7,24(28)-trien-3&beta;-ol	-4.14	-7.75	-3.88	-7.63	-7.75		a &Delta;5,7-sterol	InChIKey=ZEPNVCGPJXYABB-LOIOQLKMSA-N	CC(C)C(CC[C@@H](C)[C@@H]3(CC[C@@H]4(C2([C@@H]([C@]1(CC[C@H](O)CC/1=C/C=2)(C))CC[C@](C)34))))=C
(<i>Z</i>)-phenylacetaldehyde oxime	4.02	-7.77	-11.79	12.45	-7.73		an aldoxime	InChIKey=CXISHLWVCSLKOJ-CLFYSBASSA-N	C1(/C=CC(\\CC=NO)=C/C=1)
indole-3-carboxaldehyde	0.11	-7.57	0.06	-2.99	-7.57		an indole-phytoalexin	InChIKey=OLNJUISKUQQNIM-UHFFFAOYSA-N	[CH](=O)C1(/C2(\\C=CC=CC(/NC=1)=2))
L-proline	7.79	-11	-0.72	7.87	-7.42	*	side chain elongation cycle" // "L-<i>N<sup>&delta;</sup></i>-acetylornithine biosynthesis" // "L-citrulline biosynthesis" // "superpathway of L-citrulline metabolism" // "L-proline degradation" // "L-proline biosynthesis IV" // "L-arginine degradation VI (arginase 2 pathway)" // "L-proline biosynthesis III"	a proteinogenic amino acid // "a non-polar amino acid" // "a neutral amino acid" // "an L-amino acid"	InChIKey=ONIBWKKTOPOVIA-BYPYZUCNSA-N	C1([N+][C@@H](CC1)C(=O)[O-])
D-mannitol	-7.48	-7.39	11.56	-3.19	-7.36		a hexitol	InChIKey=FBPFZTCFMRRESA-KVTDHHQDSA-N	C([C@H]([C@H]([C@@H]([C@@H](CO)O)O)O)O)O
9-demethylmunduserone	-3.25	-6.81	6.81	0.57	-6.81		a small molecule	InChIKey=WXQDWUQQAGHKOV-SJORKVTESA-N	COC1(/C(\\OC)=C/C2(/OC[C@@H]3(OC4(/C(\\C([C@@H](C(\\C=1)=2)3)=O)=C/C=C(C=4)O))))
all-<i>trans</i>-heptaprenyl diphosphate	6.84	5.92	6.47	6.55	-6.78		an all-<i>trans</i>-polyisoprenyl diphosphate	InChIKey=LSJLEXWXRKTZAJ-YUIIPXGZSA-K	CC(C)=CCCC(/C)=C/CCC(/C)=C/CCC(/C)=C/CCC(/C)=C/CCC(/C)=C/CCC(/C)=C/COP(=O)([O-])OP(=O)([O-])[O-]
rebaudioside B	-10	-9.92	3.4	0.35	-6.7		a diterpenoid	InChIKey=SDVXZSYWMIFCCP-UOJZWYDLSA-M	C=C1(C[C@]57(C[C@@]1(O[C@H]4(O[C@@H]([C@@H](O)[C@H](O[C@@H]2([C@H](O)[C@H]([C@H](O)[C@@H](CO)O2)O))[C@@H](O[C@@H]3([C@H](O)[C@@H](CO)O[C@H]([C@H](O)3)O))4)CO))CC[C@@H]([C@]6(C)(CCC[C@](C([O-])=O)(C)[C@@H](CC5)6))7))
hemigossypolone-6-methyl ether	6.75	-6.72	-3.37	13.03	-6.67	*	a terpenoid	InChIKey=NHXUWASKMTXOKF-UHFFFAOYSA-M	CC(C1(\\C2(/C(C(CC(C(\\C(/C=O)=C(C(\\OC)=1)/[O-])=2)=O)C)=O)))C
O(2),1,7,9-tetramethylurate	-3.28	-6.45	13.44	-2.77	-6.41		a small molecule	InChIKey=ZVQXCXPGLSBNCX-UHFFFAOYSA-N	CN1(C(=O)N(C)C2(N=C(OC)N(C)C(=O)C1=2))
apigenin 7-O-(6-malonyl-&beta;-D-glucoside)	-6.3	-6.22	12.35	13.56	-6.18	*	a small molecule	InChIKey=JXWAQRJFONLTSI-ASDZUOGYSA-M	C(OC(CC([O-])=O)=O)[C@@H]4(O[C@@H](OC1(/C=C(O)C2(/C(=O)C=C(OC(\\C=1)=2)C3(/C=CC(\\O)=C/C=3))))[C@H](O)[C@@H](O)[C@H](O)4)
(3<i>R</i>)-3-hydroxycerotoyl-CoA	12.37	2.52	-2.99	-6.02	-6.08		even numbered fatty acid &beta;-oxidation" // "sphingolipid biosynthesis (plants)" // "CDP-diacylglycerol biosynthesis I" // "phosphatidylglycerol biosynthesis II (non-plastidic)" // "superpathway of phospholipid biosynthesis II (plants)" // "phosphatidylcholine acyl editing" // "triacylglycerol biosynthesis (Chlamydomonas)" // "diacylglycerol and triacylglycerol biosynthesis" // "very long chain…	a very-long-chain (3<i>R</i>)-3-hydroxyacyl-CoA	InChIKey=GBMJOTOUUWGTIA-CSLACTSSSA-J	CCCCCCCCCCCCCCCCCCCCCCC[C@@H](O)CC(=O)SCCNC(=O)CCNC(=O)[C@H](O)C(C)(C)COP(=O)(OP(=O)(OC[C@@H]1(O[C@H]([C@@H]([C@@H]1OP([O-])(=O)[O-])O)N2(C3(N=CN=C(N)C(N=C2)=3))))[O-])[O-]
CMP-3-deoxy-&beta;-D-<i>manno</i>-octulosonate	-3.32	-5.99	-6.02	-5.99	-5.99		a CMP-sugar	InChIKey=YWWJKULNWGRYAS-XKKDATLGSA-L	C(O)[C@@H](O)[C@@H]3(O[C@@](OP(OC[C@H]2([C@H]([C@H]([C@H](N1(C(N=C(C=C1)N)=O))O2)O)O))([O-])=O)(C([O-])=O)C[C@H]([C@H]3O)O)
BPH--698	-3.14	-5.97	-2.94	-5.97	-5.97		a small molecule	InChIKey=FZZSEWIFTHAVJY-UHFFFAOYSA-K	CCCC2(/C=CC(\\C1(/C=CC(\\CCCC(S(=O)(=O)O[K])P(O[K])(O[K])=O)=C/C=1))=C/C=2)
(<i>R</i>)-mandelonitrile	5.87	-5.88	13.36	14.27	-5.83		mandelonitrile	InChIKey=NNICRUQPODTGRU-QMMMGPOBSA-N	C([C@@H](C1(/C=CC=CC=1))O)#N
(5Z)-icosenoyl-CoA	7.23	-5.87	-5.85	-5.82	-5.82		a small molecule	InChIKey=BSDNSNWHAZZYHM-KMYHARBQSA-J	CCCCCCCCCCCCCCC=CCCCC(=O)SCCNC(=O)CCNC(=O)[C@H](O)C(C)(C)COP(=O)(OP(=O)(OC[C@H]1([C@@H](OP([O-])(=O)[O-])[C@@H](O)[C@@H](O1)N2(C3(N=CN=C(C(N=C2)=3)N))))[O-])[O-]
N-bromosuccinimide	-3.01	-5.76	-2.91	-5.76	-5.76		an organobromine compound	InChIKey=PCLIMKBDDGJMGD-UHFFFAOYSA-N	C1(C(N(C(C1)=O)Br)=O)
dCDP	-11.74	-11.66	-8.36	-11.61	-5.74		a pyrimidine 2'-deoxyribonucleoside 5'-diphosphate // "a pyrimidine"	InChIKey=FTDHDKPUHBLBTL-SHYZEUOFSA-K	C([C@H]2([C@H](C[C@H](N1(C(N=C(C=C1)N)=O))O2)O))OP(OP(=O)([O-])[O-])([O-])=O
2,4,6-trihydroxycinnamoyl-CoA	6.59	-5.7	6.28	-5.7	-5.7		a coenzyme A-activated compound	InChIKey=SYWCHDHDSJLGJL-VWNJLPARSA-J	CC(C)([C@@H](O)C(=O)NCCC(=O)NCCSC(=O)C=CC1(C=C(O)C(\\O)=C/C(O)=1))COP(=O)(OP(=O)(OC[C@H]2([C@@H](OP([O-])(=O)[O-])[C@@H](O)[C@@H](O2)N3(C4(N=CN=C(C(N=C3)=4)N))))[O-])[O-]
D-erythrose 4-phosphate	2.59	-8.69	-2.92	-11.39	-5.7		a sugar phosphate	InChIKey=NGHMDNPXVRFFGS-IUYQGCFVSA-L	[CH]([C@@H]([C@@H](COP([O-])([O-])=O)O)O)=O
3-methyl-2-oxobutanoate	-5.78	-5.67	-5.68	-5.66	-5.65		side chain elongation cycle" // "Organic Nitrogen Assimilation" // "dimethylsulfoniopropanoate biosynthesis I (Wollastonia)" // "L-asparagine degradation II" // "L-homomethionine biosynthesis" // "dimethylsulfoniopropanoate biosynthesis III (algae)" // "<i>S</i>-methyl-5-thio-&alpha;-D-ribose 1-phosphate degradation I" // "phosphopantothenate biosynthesis I" // "superpathway of coenzyme A biosynt…	a 2-oxo carboxylate	InChIKey=QHKABHOOEWYVLI-UHFFFAOYSA-M	CC(C(C([O-])=O)=O)C
ITP	-0.08	-5.55	-2.5	-5.55	-5.55		a purine ribonucleoside 5'-triphosphate // "a nucleic acid component"	InChIKey=HAEJPQIATWHALX-KQYNXXCUSA-J	C(OP(=O)([O-])OP([O-])(=O)OP([O-])([O-])=O)[C@@H]1(O[C@H]([C@H](O)[C@H](O)1)N2(C=NC3(C(=O)NC=NC2=3)))
(2<i>R</i>)-ethylmalonyl-CoA	3.59	4.07	4.11	-4.98	-5.11	*	a coenzyme A-activated compound	InChIKey=VUGZQVCBBBEZQE-XGVFZYDCSA-I	CC[C@@H](C(SCCNC(=O)CCNC(=O)[C@H](O)C(C)(C)COP(=O)(OP(=O)(OC[C@H]1([C@@H](OP([O-])(=O)[O-])[C@@H](O)[C@@H](O1)N2(C3(N=CN=C(C(N=C2)=3)N))))[O-])[O-])=O)C([O-])=O
3,5-didehydroshikimate	-4.42	-4.42	-4.43	-4.42	-4.42		a small molecule	InChIKey=MTNXHXKXYFWIRI-ZCFIWIBFSA-M	C([O-])(=O)C1(/CC(=O)[C@H](O)C(=O)C=1)
L-pentahomomethionine	-9.01	-16.94	8.46	-4.54	-4.34	*	an L-polyhomomethionine	InChIKey=GYYOKOIBHIWNHE-VIFPVBQESA-N	CSCCCCCCC[C@H]([N+])C(=O)[O-]
(3<i>R</i>)-3-hydroxybutanoyl-CoA	-4.39	-0.73	16.08	-4.18	-4.3		even numbered fatty acid &beta;-oxidation" // "sphingolipid biosynthesis (plants)" // "CDP-diacylglycerol biosynthesis I" // "phosphatidylglycerol biosynthesis II (non-plastidic)" // "superpathway of phospholipid biosynthesis II (plants)" // "phosphatidylcholine acyl editing" // "triacylglycerol biosynthesis (Chlamydomonas)" // "diacylglycerol and triacylglycerol biosynthesis" // "lysine degradat…	a short-chain (3<i>R</i>)-3-hydroxyacyl-CoA // "3-hydroxybutanoyl-CoA"	InChIKey=QHHKKMYHDBRONY-WZZMXTMRSA-J	C[C@H](CC(SCCNC(=O)CCNC(=O)[C@H](O)C(C)(C)COP(=O)(OP(=O)(OC[C@H]1([C@@H](OP([O-])(=O)[O-])[C@@H](O)[C@@H](O1)N2(C3(N=CN=C(C(N=C2)=3)N))))[O-])[O-])=O)O
2,2'-azino-bis-(3-ethylbenzothiazoline-6-sulfonate) radical cation	-4.28	-4.28	-1.39	-4.28	-4.28		a radical	InChIKey=HFNOFNDLBTVECO-UHFFFAOYSA-L	CC[N+]3(C(=NN=C1(N(CC)C2(\\C=CC(\\S(=O)(=O)[O-])=C/C(/S1)=2)))SC4(\\C=C(C=CC/3=4)S(=O)(=O)[O-]))
dTDP group	-4.06	-4.06	-1.07	-4.06	-4.06		a nucleoside phosphate group		CC1(/C(=O)NC(=O)N(C=1)[C@@H]2(C[C@H](O)[C@@H](COP(=O)([O-])OP(=O)([O-])O)O2))
<i>ent</i>-kaurenal	-14.78	-11.39	-22.39	-11.48	-3.96		a small molecule	InChIKey=JCAVDWHQNFTFBW-XRNRSJMDSA-N	C=C1([C@@H]4(C[C@]3(C1)(CC[C@H]2([C@](C)(C=O)CCC[C@](C)2[C@@H]3CC4))))
1,3-propanediol-P	15.44	-3.91	2.51	-3.91	-3.91		a small molecule	InChIKey=HYCSHFLKPSMPGO-UHFFFAOYSA-L	C(O)CCOP([O-])([O-])=O
pseudo-conhydrine	11.24	7.81	3.81	15.63	-3.72		an alkaloid	InChIKey=BQSAUYXITCMAKS-UHFFFAOYSA-O	CCCC1(CCC(O)C[N+]1)
HBOA	-1.65	-5.04	-0.63	-4.92	-3.66		an indole derivative	InChIKey=VMQBFYRBJKDACN-UHFFFAOYSA-N	C1(/C=CC2(/OC(C(NC(\\C=1)=2)=O)O))
(R)-3,4-dihydroxymandelonitrile	-1.65	-5.04	-0.63	-4.77	-3.66		4-dihydroxymandelonitrile &beta;-<i>D</i>-glucose biosynthesis"	an aromatic (<i>R</i>)-hydroxynitrile	InChIKey=CRISWXPNFWRXSH-QMMMGPOBSA-N	C1(\\C=C(O)C(\\O)=C/C(\\[C@@H](O)C#N)=1)
robustaquinone A	-3.77	-3.69	11.39	-3.49	-3.64		a hydroxyanthraquinone	InChIKey=BHXGNEJDWATDFR-UHFFFAOYSA-M	CC1(\\C=C(C2(/C(=O)C3(\\C=C(OC)C(/[O-])=C(C(/C(=O)C(\\C(\\O)=1)=2)=3)/OC)))O)
(indol-3-yl)acetyl-L-tyrosine	-4.28	-4.49	-4.7	-4.5	-3.61		an indole derivative // "a modified amino acid"	InChIKey=HLBLLQMXYYYBLN-KRWDZBQOSA-M	C2(/NC3(\\C=CC=CC(/C(\\CC(N[C@H](C([O-])=O)CC1(/C=CC(\\O)=C/C=1))=O)=2)=3))
5,6-epoxy-3-hydroxy-12'-apo-&beta;-caroten-12'-al	0.03	-3.59	18.29	15.69	-3.59	*	a 12'-apo-carotenal	InChIKey=QZOYIQGWDBXSHB-XLGKAWHDSA-N	CC(\\C=CC=C(C=CC12(C(CC(CC1(O2)C)O)(C)C))C)=C/C=CC=C(C=CC=O)C
3-(pyrazol-1-yl)-L-alanine	-4.19	-7.47	-0.2	-10.87	-3.58		a modified amino acid	InChIKey=PIGOPELHGLPKLL-YFKPBYRVSA-N	C1(/N(N=CC=1)C[C@H]([N+])C(=O)[O-])
(22&alpha;)-hydroxy-campest-4-en-3-one	-0.1	0.27	-0.08	-3.58	-3.57		a brassinosteroid	InChIKey=FMFAICDKESPFNH-NQMBQAPESA-N	CC(C)[C@H](C)C[C@H](O)[C@@H](C)[C@@H]3(CC[C@@H]4([C@H]2(CCC1(/[C@@](CCC(=O)C=1)(C)[C@H]2CC[C@](C)34))))
D-threonine	3.48	-3.56	-3.59	0.16	-3.56		a D-amino acid	InChIKey=AYFVYJQAPQTCCC-STHAYSLISA-N	C[C@H](O)[C@@H]([N+])C(=O)[O-]
dUTP	-0.61	-3.34	-0.25	-3.34	-3.34		a pyrimidine 2'-deoxyribonucleoside 5'-triphosphate // "a pyrimidine"	InChIKey=AHCYMLUZIRLXAA-SHYZEUOFSA-J	C([C@H]2([C@H](C[C@H](N1(C(NC(C=C1)=O)=O))O2)O))OP(OP(OP(=O)([O-])[O-])([O-])=O)([O-])=O
&gamma;-methylphosphinothricin	-3.43	-3.32	-3.33	-3.18	-3.32		an amino acid	InChIKey=LLSWVOXJHFIPIU-UHFFFAOYSA-M	CC(P([O-])(C)=O)CC([N+])C(=O)[O-]
hispidol-4'-<i>O</i>-&beta;-<i>D</i>-glucoside	-3.44	-3.31	-3.35	6.62	-3.31		an aurone	InChIKey=TZOWYMKOGOEJDC-MTUHIDJDSA-N	C4(\\C=C(O[C@@H]1([C@@H]([C@H]([C@H](O)[C@H](O1)CO)O)O))C=CC(\\[CH]=C2(C(=O)C3(/C(\\O2)=C/C(\\O)=C/C=3)))=4)
7,8-dihydropteroate	-10.13	0.53	10.34	-9.93	-3.24		a pteroate	InChIKey=WBFYVDCHGVNRBH-UHFFFAOYSA-M	C(NC1(/C=CC(\\C(=O)[O-])=C/C=1))C2(CNC3(\\N=C(N)NC(=O)C(\\N=2)=3))
kaempferol 3-<i>O</i>-&beta;-<i>D</i>-glucosylgalactoside	-3.27	-3.19	6.89	10.3	-3.14		a flavonol 3-<i>O</i>-glycoside	InChIKey=LKZDFKLGDGSGEO-PABQPRPFSA-M	C([C@@H]4(O[C@@H](OC2(/C(C3(\\C(\\OC(/C1(/C=CC(\\O)=C/C=1))=2)=C/C(\\[O-])=C/C(/O)=3))=O))[C@@H]([C@@H](O)[C@H]4O)O[C@@H]5([C@@H]([C@H]([C@H](O)[C@H](O5)CO)O)O)))O
GDP	-0.25	-2.89	0.14	-2.89	-2.89		a purine ribonucleoside 5'-diphosphate // "a nucleic acid component"	InChIKey=QGWNDRXFNXRZMB-UUOKFMHZSA-K	C(OP(=O)([O-])OP(=O)([O-])[O-])[C@@H]1(O[C@H]([C@H](O)[C@H](O)1)N2(C=NC3(C(=O)NC(N)=NC2=3)))
sinapoyl-CoA	-2.99	-2.89	-2.89	-2.74	-2.89		a coenzyme A-activated compound // "a phenylpropanoid"	InChIKey=RBFUWESMWRUGFY-GSNIOFLCSA-J	CC(C)([C@@H](O)C(=O)NCCC(=O)NCCSC(=O)C=CC1(C=C(OC)C(/O)=C(C=1)/OC))COP(=O)(OP(=O)(OC[C@H]2([C@@H](OP([O-])(=O)[O-])[C@@H](O)[C@@H](O2)N3(C4(N=CN=C(C(N=C3)=4)N))))[O-])[O-]
tetranitromethane	3.07	-3.01	-2.9	-3.03	-2.87		a C-nitro compound	InChIKey=NYTOUQBROMCLBJ-UHFFFAOYSA-N	C([N+]([O-])=O)([N+]([O-])=O)([N+](=O)[O-])[N+]([O-])=O
UDP	-0.05	-2.84	3.41	-2.84	-2.84		3-&beta;-D-glucan biosynthesis" // "salidroside biosynthesis" // "xyloglucan biosynthesis" // "UDP-glucose biosynthesis (from sucrose)" // "sucrose degradation II (sucrose synthase)" // "superpathway of anaerobic sucrose degradation" // "flavonol acylglucoside biosynthesis III - quercetin derivatives" // "rutin biosynthesis" // "xylan biosynthesis" // "salicylate glucosides biosynthesis II" // "s…	4-dihydroxymandelonitrile &beta;-<i>D</i>-glucose biosynthesis" // "luteolin glycosides biosynthesis" // "apigenin glycosides biosynthesis" // "kaempferol gentiobioside biosynthesis" // "esculetin modification" // "curcumin glucoside biosynthesis" // "naringenin glycoside biosynthesis" // "2	4	6-trinitrotoluene degradation" // "sphingolipid biosynthesis (plants)" // "sulfoquinovosyl diacylglycerol biosynthesis" // "gossypetin metabolism" // "benzoyl-&beta;-<i>D</i>-glucopyranose biosynthesis" // "des-methyl avenacin A-1 biosynthesis" // "<i>N</i>-methylanthraniloyl-&beta;-<i>D</i>-glucopyranose biosynthesis" // "podophyllotoxin glucosides metabolism" // "(+)-secoisolariciresinol digluc…	a pyrimidine ribonucleoside 5'-diphosphate // "a pyrimidine"	InChIKey=XCCTYIAWTASOJW-XVFCMESISA-K	C(OP(=O)([O-])OP(=O)([O-])[O-])[C@@H]1(O[C@H]([C@H](O)[C@H](O)1)N2(C=CC(=O)NC(=O)2))
luteolin 7-<i>O</i>-[&beta;-D-glucosyluronate-(1,2)-&beta;-D-glucosiduronate]-4'-<i>O</i>-&beta;-D-glucosiduronate	5.54	-2.81	2.85	-2.81	-2.81		a small molecule	InChIKey=AEYXZGCDWDUIKX-OFFAAIFBSA-K	C([C@@H]6(O[C@@H](OC5(/C(\\O)=C/C(\\C1(/OC4(/C(/C(C=1)=O)=C(C=C(O[C@@H]2([C@@H]([C@H]([C@@H]([C@@H](C([O-])=O)O2)O)O)O[C@H]3(O[C@@H]([C@H]([C@@H]([C@H]3O)O)O)C([O-])=O)))C=4)/O)))=C/C=5))[C@@H]([C@H]([C@@H]6O)O)O))(=O)[O-]
6-phospho D-glucono-1,5-lactone	2.75	-2.74	0.29	-2.74	-2.74		a small molecule	InChIKey=IJOJIVNDFQSGAB-SQOUGZDYSA-L	C(OP([O-])(=O)[O-])[C@H]1([C@@H](O)[C@H](O)[C@@H](O)C(=O)O1)
ADP group	0.05	-2.71	0.23	-2.71	-2.71		a nucleoside phosphate group		C([C@H]3([C@H]([C@H]([C@H](N1(C2(N=CN=C(C(N=C1)=2)N)))O3)O)O))OP(OP([O-])(=O)O)(=O)[O-]
(1R,3R)-chrysanthemoyl CoA	15.01	-2.73	-2.72	-2.67	-2.69	*	a coenzyme A-activated compound	InChIKey=IOIRXYHMXCHGNR-JRAGNYAJSA-J	CC(C)=C[C@H]4([C@@H](C(SCCNC(=O)CCNC(=O)[C@H](O)C(C)(C)COP(=O)(OP(=O)(OC[C@H]1([C@@H](OP([O-])(=O)[O-])[C@@H](O)[C@@H](O1)N2(C3(N=CN=C(C(N=C2)=3)N))))[O-])[O-])=O)[C@@]4(C)C)
2,4-dichlorophenoxyacetate	2.76	-8.58	-2.51	-8.49	-2.66		a small molecule	InChIKey=OVSKIKFHRZPJSS-UHFFFAOYSA-M	C(COC1(\\C=CC(\\Cl)=C/C(/Cl)=1))(=O)[O-]
6-(methylsulfanyl)hexyl-desulfoglucosinolate	1.41	-1.88	1.26	-1.72	-2.59		an (<i>E</i>)-<i>S</i>-glucosyl-<i>N</i>-hydroxy-&omega;-(methylsulfanyl)alkimidothioate	InChIKey=RTWFLPZWHKDFBK-BXLHIMNRSA-N	CSCCCCCCC(=NO)S[C@H]1(O[C@H](CO)[C@@H](O)[C@H](O)[C@@H](O)1)
(-)-medicarpin-3-<i>O</i>-glucoside	-0.14	-1.58	-0.08	-1.4	-2.26	*	a small molecule	InChIKey=PVEMGMOWXQUWRD-NJAOXFEXSA-N	COC5(/C=C1(C(\\[C@@H]3([C@@H](O1)C4(\\C=CC(\\O[C@H]2(O[C@H](CO)[C@@H](O)[C@H](O)[C@@H](O)2))=C/C(/OC3)=4)))=C/C=5))
7-hydroxylaurate	-5.8	-5.82	-5.81	-5.8	-2.17		an in-chain hydroxy fatty acid // "a medium-chain 2	3	4-saturated fatty acid" // "a saturated fatty acid"	InChIKey=BNWKMHUFFKDAMV-UHFFFAOYSA-M	CCCCCC(O)CCCCCC([O-])=O
(R)-4-hydroxymandelonitrile	-2.53	8.6	-9.58	9.97	-2		an aromatic (<i>R</i>)-hydroxynitrile	InChIKey=HOOOPXDSCKBLFG-QMMMGPOBSA-N	C1(\\C=C(O)C=CC(\\[C@@H](O)C#N)=1)
L-cysteinylglycine	-5.57	4.6	-11.73	-7.62	-1.9		a dipeptide with a C-terminal glycine	InChIKey=ZUKPVRWZDMRIEO-VKHMYHEASA-N	C(C([O-])=O)NC([C@H](CS)[N+])=O
neolinustatin	-0.1	-1.41	0.27	-1.26	-1.75		a nitrile // "a &beta;-D glucoside"	InChIKey=WOSYVGNDRYBQCQ-BARGLTKPSA-N	CC[C@@](O[C@H]2(O[C@H](CO[C@H]1(O[C@H](CO)[C@@H](O)[C@H](O)[C@@H](O)1))[C@@H](O)[C@H](O)[C@@H](O)2))(C#N)C
celosianin I	0.08	-1.42		-1.53	-1.6	*	an alkaloid	InChIKey=VYAFZESLHLWKCS-QBXHKHJLSA-L	C(O)[C@H]3([C@@H](O)[C@H](O)[C@@H](O[C@@H]1([C@@H]([C@H]([C@@H]([C@H](O1)C([O-])=O)O)O)OC(=O)C=CC2(C=CC(\\O)=C/C=2)))[C@@H](O3)OC6(\\C=C5(C[C@@H](C([O-])=O)[N+](=CC=C4(C=C([N+][C@H](C(=O)[O-])C4)C(=O)[O-]))C/5=C/C(/O)=6)))
ppGpp	0.88	-0.17	0.62	-0.09	-1.57	*	a modified nucleotide	InChIKey=BUFLLCUFNHESEH-UUOKFMHZSA-I	C(OP(=O)([O-])OP(=O)(O)[O-])[C@@H]1(O[C@H]([C@H](O)[C@H](OP([O-])(=O)OP([O-])([O-])=O)1)N2(C=NC3(C(=O)NC(N)=NC2=3)))
guanosine tetraphosphate	-0.27	-7.04	0.7	-0.01	-1.5	*	a modified nucleotide	InChIKey=KDFXXNGTULMGMF-UUOKFMHZSA-I	C(OP(=O)([O-])OP(=O)(OP([O-])(OP([O-])(=O)[O-])=O)[O-])[C@@H]1(O[C@H]([C@H](O)[C@H](O)1)N2(C=NC3(C(=O)NC(N)=NC2=3)))
preuroporphyrinogen	0.13	-1.14	0.05	-1.36	-1.42	*	a small molecule	InChIKey=WDFJYRZCZIUBPR-UHFFFAOYSA-F	C(O)C4(/NC(\\CC3(/NC(\\CC2(/NC(\\CC1(/NC=C(CCC(=O)[O-])C(\\CC([O-])=O)=1))=C(CCC(=O)[O-])/C(\\CC([O-])=O)=2))=C(CCC(=O)[O-])/C(\\CC(=O)[O-])=3))=C(CCC(=O)[O-])/C(\\CC(=O)[O-])=4)
2-hydroxyeriodictyol	-0.78	-11.41	-0.37	-18.34	-1.35		a 2-hydroxyflavanone	InChIKey=WBHCYFXEVWJBEE-UHFFFAOYSA-N	C3(\\C=C(O)C(\\O)=C/C(\\C1(O)(OC2(/C(/C(=O)C1)=C(C=C(O)C=2)/O)))=3)
3-nitrobenzaldehyde	-1.58	-1.13	0.07	-1.7	-1.3		a C-nitro compound	InChIKey=ZETIVVHRRQLWFW-UHFFFAOYSA-N	C(C1(/C=CC=C(C=1)[N+]([O-])=O))=O
dihydro-10-thiopteroate	0.24	-1.49	0.1	0.61	-0.91		a pteroate	InChIKey=DVFLJCBBQOODBA-UHFFFAOYSA-M	C2(NC3(\\N=C(N)NC(=O)C(\\N=C(CSC1(/C=CC(\\C([O-])=O)=C/C=1))2)=3))
TRIBOA-&beta;-D-glucoside	0.08	-15.39	-0.14	-1.02	-0.87		a small molecule	InChIKey=YCPMEKOJGFYFJJ-BJPDSMLBSA-N	C3(\\C=C2(C(\\OC(O[C@H]1(O[C@H](CO)[C@@H](O)[C@H](O)[C@@H](O)1))C(=O)N(O)2)=C/C(\\O)=3))
L-glutamate-5-semialdehyde	0.3	-7.05	0.42	-0.13	-0.76		a non-proteinogenic &alpha;-amino acid	InChIKey=KABXUUFDPUOJMW-BYPYZUCNSA-N	C(C[C@H]([N+])C([O-])=O)[CH]=O
7-(methylsulfanyl)heptyl-desulfoglucosinolate	0.01	-0.96	0.3	-1.01	-0.69	*	an (<i>E</i>)-<i>S</i>-glucosyl-<i>N</i>-hydroxy-&omega;-(methylsulfanyl)alkimidothioate	InChIKey=HRWHFIDSPSFJJQ-MFIRQCQASA-N	CSCCCCCCCC(=NO)S[C@H]1(O[C@H](CO)[C@@H](O)[C@H](O)[C@@H](O)1)
3-epoxy-16-methoxy-2,3-dihydrotabersonine	-0.24	-0.91	0.19	-24.04	-0.65	*	a small molecule	InChIKey=BOHJHCDMBHKGFD-OGQGWYMCSA-O	CC[C@]16(C=CC[N+]5(CC[C@]3(C4(\\C=CC(\\OC)=C/C(/NC2(OC(C(=O)OC)(C1)2)3)=4))[C@@H]56))
(S)-coclaurine	0.19	-0.6	-0.11	-10.22	-0.6		a small molecule	InChIKey=LVVKXRQZSRUVPY-HNNXBMFYSA-O	C1([N+][C@H](C2(/C=C(C(\\OC)=C/C(/C1)=2)O))CC3(/C=CC(\\O)=C/C=3))
7,8-dihydroberberine	-8.67	-8.55	-8.72	-7.98	-0.55		an alkaloid	InChIKey=FZAGOOYMTPGPGF-UHFFFAOYSA-N	C2(CC5(\\C=C1(OCOC/1=C/C(\\C3(/N2CC4(\\C(\\C=3)=C/C=C(OC)C(/OC)=4)))=5)))
1-18:0-2-18:3-phosphatidylethanolamine	-3.98	-0.62	-0.02	-0.41	-0.54		a small molecule		C(C(OC(=O)CCCC=CCCC=CCC=CCCCCC)COP(OCC[N+])([O-])=O)OC(=O)CCCCCCCCCCCCCCCCC
9-<i>cis</i>-10'-apo-&beta;-carotenal	1.69	0.3	0.67	1.23	-0.47		an apocarotenoid	InChIKey=PJEHRCCPERVGEC-OLTPUEGQSA-N	CC(\\C=CC=C(C)C=CC1(/C(C)(C)CCCC(\\C)=1))=C/C=CC=C(C=CC=O)C
2-<i>S</i>-cysteinyldopaquinone	0.07	-0.35	0.37	0.61	-0.35		a quinone	InChIKey=WZVBMYNCJXSJII-BQBZGAKWSA-N	C(SC1(/C(C(C=CC(/C[C@@H](C(=O)[O-])[N+])=1)=O)=O))[C@@H](C(=O)[O-])[N+]
D-galactosylononitol	-0.37	1.43	-0.08	1.98	-0.32		a methylated inositol // "a galactosyl inositol"	InChIKey=RSYNCMYDVZFZBP-NRORZAABSA-N	CO[C@H]1([C@H]([C@@H]([C@@H]([C@@H]([C@H]1O)O)O)O)O[C@H]2([C@@H]([C@H]([C@H]([C@H](O2)CO)O)O)O))
11-deoxoglycyrrhetinate	0.44	-4.35	-0.04	-21.51	-0.21	*	a triterpenoid	InChIKey=JZFSMVXQUWRSIW-YHSIJDKQSA-N	C[C@@]4(C)(C3(CC[C@@]2(C)([C@]1(C)(CC[C@]5([C@H](C/1=C/CC2[C@](C)3CC[C@H](O)4)C[C@](C(O)=O)(C)CC5)C))))
2-benzoyloxy-3-butenylglucosinolate	2.63	-3.45	-6.55	-0.18	-0.19		a small molecule	InChIKey=NCAVLZAQUKCVIQ-KOUBOPALSA-M	C=CC(OC(C1(/C=CC=CC=1))=O)CC(=NOS(=O)(=O)[O-])S[C@H]2(O[C@H](CO)[C@@H](O)[C@H](O)[C@@H](O)2)
3-<i>O</i>-digalloyl-1,2,4,6-tetra-<i>O</i>-&beta;-<i>D</i>-galloylglucose	8.46	-0.06	-0.01	-0.01	-0.06		a gallotannin	InChIKey=ZYDLAYCPLOHXHH-YHNAUUMRSA-N	C(OC(C1(/C=C(O)C(/O)=C(C=1)/O))=O)[C@@H]6(O[C@H]([C@H](OC(C2(/C=C(O)C(/O)=C(C=2)/O))=O)[C@@H](OC(=O)C4(/C=C(OC(C3(/C=C(O)C(/O)=C(C=3)/O))=O)C(/O)=C(C=4)/O))[C@H](OC(=O)C5(/C=C(O)C(/O)=C(C=5)/O))6)OC(C7(/C=C(O)C(/O)=C(C=7)/O))=O)
codeine	11.29	-0.06	-0.02	-0.02	-0.05		a small molecule	InChIKey=OROGSEYTTFOCAN-DNJOTXNNSA-O	C[N+]4(CC[C@]15([C@H]3([C@@H](O)C=C[C@@H]([C@@H](CC2(/C=CC(/OC)=C(C\\1=2)/O3))4)5)))
1-<i>O</i>-(indol-3-ylacetyl)-&beta;-D-glucose	19.69	10.94		20.93	-0.05		a small molecule	InChIKey=HHDMMUWDSFASNB-JZYAIQKZSA-N	C2(/NC3(\\C=CC=CC(/C(\\CC(=O)O[C@H]1(O[C@H](CO)[C@@H](O)[C@H](O)[C@@H](O)1))=2)=3))
1D-<i>myo</i>inositol 5-diphosphate 1,2,3,4,6-pentakisphosphate	-0.05	2.7	-0.08	8.62	-0.05		a diphospho-1D-myo-inositol pentakisphosphate	InChIKey=UPHPWXPNZIOZJL-KXXVROSKSA-A	[C@@H]1(OP([O-])([O-])=O)([C@@H](OP([O-])([O-])=O)[C@H](OP([O-])(=O)[O-])[C@@H](OP([O-])(=O)OP([O-])(=O)[O-])[C@H](OP(=O)([O-])[O-])[C@@H](OP(=O)([O-])[O-])1)
(2S,3S)-3-hydroxy-2-methylbutanoyl-CoA	2.8	-0.04	-0.04	-0.04	-0.04		a coenzyme A-activated compound	InChIKey=PEKYNTFSOBAABV-LQUDNSJZSA-J	C[C@H](C(=O)SCCNC(=O)CCNC(=O)[C@H](O)C(C)(C)COP(=O)(OP(=O)(OC[C@H]1([C@@H](OP([O-])(=O)[O-])[C@@H](O)[C@@H](O1)N2(C3(N=CN=C(C(N=C2)=3)N))))[O-])[O-])[C@H](C)O
benzoyl-CoA	2.83	-0.04	-0.04	3.53	-0.04		&beta;-oxidative)" // "salicortin biosynthesis" // "volatile benzenoid biosynthesis I (ester formation)" // "cocaine biosynthesis" // "taxol biosynthesis"	a coenzyme A-activated compound	InChIKey=VEVJTUNLALKRNO-TYHXJLICSA-J	CC(C)([C@@H](O)C(=O)NCCC(=O)NCCSC(=O)C1(/C=CC=CC=1))COP(=O)(OP(=O)(OC[C@H]2([C@@H](OP([O-])(=O)[O-])[C@@H](O)[C@@H](O2)N3(C4(N=CN=C(C(N=C3)=4)N))))[O-])[O-]
feruloylacetyl-CoA	2.69	-0.03	-0.03	-0.03	-0.03		a coenzyme A-activated compound	InChIKey=KBVPPTKWCRMUEW-KEJNSVKLSA-J	CC(C)([C@@H](O)C(=O)NCCC(=O)NCCSC(=O)CC(=O)C=CC1(C=CC(/O)=C(C=1)/OC))COP(=O)(OP(=O)(OC[C@H]2([C@@H](OP([O-])(=O)[O-])[C@@H](O)[C@@H](O2)N3(C4(N=CN=C(C(N=C3)=4)N))))[O-])[O-]
UDP-&beta;-L-rhamnose	2.82	-0.03	-0.03	-0.03	-0.03		a UDP-sugar	InChIKey=DRDCJEIZVLVWNC-SLBWPEPYSA-L	C[C@H]3(O[C@H](OP(OP(=O)([O-])OC[C@@H]1(O[C@H]([C@H](O)[C@H](O)1)N2(C=CC(=O)NC(=O)2)))([O-])=O)[C@H](O)[C@H](O)[C@@H](O)3)
4-hydroxy-3-methoxyphenyl-&beta;-hydroxypropanoyl-CoA	6.14	-0.02	-0.02	-0.02	-0.02		a coenzyme A-activated compound	InChIKey=SDNPOBCYTJKZSD-XWQDBIPASA-J	CC(C)([C@@H](O)C(=O)NCCC(=O)NCCSC(=O)CC(O)C1(/C=C(OC)C(\\O)=C/C=1))COP(=O)(OP(=O)(OC[C@H]2([C@@H](OP([O-])(=O)[O-])[C@@H](O)[C@@H](O2)N3(C4(N=CN=C(C(N=C3)=4)N))))[O-])[O-]
(<i>R</i>)-3-(phenyl)lactoyl-CoA	8.76	-0.02	-0.02	-0.02	-0.02		a coenzyme A-activated compound	InChIKey=FKMUDVUPQINOSF-NHZRKUKBSA-J	CC(C)([C@@H](O)C(=O)NCCC(=O)NCCSC(=O)[C@H](O)CC1(/C=CC=CC=1))COP(=O)(OP(=O)(OC[C@H]2([C@@H](OP([O-])(=O)[O-])[C@@H](O)[C@@H](O2)N3(C4(N=CN=C(C(N=C3)=4)N))))[O-])[O-]
isobutanoyl-CoA	8.89	-0.02	-0.02	-0.02	-0.02		a coenzyme A-activated compound	InChIKey=AEWHYWSPVRZHCT-NDZSKPAWSA-J	CC(C(SCCNC(=O)CCNC(=O)[C@H](O)C(C)(C)COP(=O)(OP(=O)(OC[C@H]1([C@@H](OP([O-])(=O)[O-])[C@@H](O)[C@@H](O1)N2(C3(N=CN=C(C(N=C2)=3)N))))[O-])[O-])=O)C
&gamma;-linolenate	-0.14	3.61	-0.01	11.65	-0.01		a long-chain 2,3,4-saturated fatty acid // "a &omega;-6 fatty acid"	InChIKey=VZCCETWTMQHEPK-QNEBEIHSSA-M	CCCCCC=CCC=CCC=CCCCCC(=O)[O-]
sequoyitol	3.19	-0.05	-0.03	-0.03	-0.01		a methylated inositol	InChIKey=DSCFFEYYQKSRSV-GWJPIIGYSA-N	CO[C@H]1([C@@H](O)[C@H](O)[C@H](O)[C@H](O)[C@@H](O)1)
<i>N</i>-(5-phosphoribosyl)-anthranilate	3.24	-0.05	-0.03	0.17	-0.01		a small molecule	InChIKey=PMFMJXPRNJUYMB-GWOFURMSSA-K	C(OP(=O)([O-])[O-])[C@@H]2(O[C@@H](NC1(\\C=CC=CC(/C(=O)[O-])=1))[C@H](O)[C@H](O)2)
luteoforol	-0.14	-0.05	-0.03	3.52	-0.01		a flavan-4-ol	InChIKey=FSYDWKPCKNCRDI-ABLWVSNPSA-N	C3(\\C=C(C(\\O)=C/C(\\[C@@H]1(OC2(/C(/C(C1)O)=C(C=C(O)C=2)/O)))=3)O)
tri-acyl estolide	20.56	2.94	0.01	20.38	-0.01		as a signaling molecule (Chlamydomonas)" // "phosphatidate metabolism	as a signaling molecule" // "CDP-diacylglycerol biosynthesis II" // "phosphatidylglycerol biosynthesis I (plastidic)" // "CDP-diacylglycerol biosynthesis I" // "phosphatidylglycerol biosynthesis II (non-plastidic)" // "superpathway of phospholipid biosynthesis II (plants)" // "diacylglycerol and triacylglycerol biosynthesis" // "arachidonate biosynthesis I (6-desaturase	lower eukaryotes)" // "icosapentaenoate biosynthesis I (lower eukaryotes)" // "docosahexaenoate biosynthesis I (lower eukaryotes)" // "linoleate biosynthesis I (plants)" // "dimorphecolate biosynthesis" // "hydroxylated fatty acid biosynthesis (plants)" // "triacylglycerol biosynthesis (Chlamydomonas)" // "stigma estolide biosynthesis"	a carboxylic ester // "a 1	2-diacyl-<i>sn</i>-glycerol 3-phosphate"	InChIKey=ZQPBAVRTRJHDII-USITZPDMSA-N	C(O)CCCCCCCC=CCCCCCCCC(OCCCCCCCCC=CCCCCCCCC(OC[C@@H](OC(=O)CCCCCCCC=CCC=CCCCCCO)CO)=O)=O
(3<i>R</i>)-3-amino-3-phenylpropanoyl-CoA	17.51	-0.01	-0.01	-0.01	-0.01	*	3-amino-3-phenylpropanoyl-CoA	InChIKey=SUUAAMNYLVZHRN-JOQFVOQGSA-K	CC(C)([C@@H](O)C(=O)NCCC(=O)NCCSC(C[C@@H]([N+])C1(/C=CC=CC=1))=O)COP(=O)(OP(=O)(OC[C@H]2([C@@H](OP([O-])(=O)[O-])[C@@H](O)[C@@H](O2)N3(C4(N=CN=C(C(N=C3)=4)N))))[O-])[O-]
levopimaric acid		-0.04		7.27	0.01		a diterpenoid // "an acid"	InChIKey=RWWVEQKPFPXLGL-RMGPQRKISA-M	CC(C3(C=C2([C@@H]([C@]1(C([C@@](CCC1)(C(=O)[O-])C)CC2)C)CC=3)))C
dCTP	0.01	0.01	3.09	0.01	0.01		a pyrimidine 2'-deoxyribonucleoside 5'-triphosphate // "a pyrimidine"	InChIKey=RGWHQCVHVJXOKC-SHYZEUOFSA-J	C([C@H]2([C@H](C[C@H](N1(C(N=C(C=C1)N)=O))O2)O))OP(OP(OP(=O)([O-])[O-])([O-])=O)([O-])=O
(11Z,14Z,17Z)-icosatrienoyl-CoA	5.57	3.69	-0.03	0.13	0.02		a coenzyme A-activated compound	InChIKey=BVBYYRVLCDMZNJ-UBQHHBPXSA-J	CCC=CCC=CCC=CCCCCCCCCCC(=O)SCCNC(=O)CCNC(=O)[C@H](O)C(C)(C)COP(=O)(OP(=O)(OC[C@@H]1(O[C@H]([C@@H]([C@@H]1OP([O-])(=O)[O-])O)N2(C3(N=CN=C(N)C(N=C2)=3))))[O-])[O-]
phaseoluteone		-0.02		3.51	0.03		a small molecule	InChIKey=KCUZCRLRQVRBBV-UHFFFAOYSA-M	CC(C)=CCC3(\\C(\\O)=C/C=C(C1(/C(C2(\\C(\\OC=1)=C/C(\\[O-])=C/C(/O)=2))=O))C(\\O)=3)
2-hydroxymalonate	19.17	-0.02			0.04		a small molecule	InChIKey=ROBFUDYVXSDBQM-UHFFFAOYSA-L	C([O-])(=O)C(O)C([O-])=O
vinyl acetate	2.79	0.06	2.83	8.77	0.06		a small molecule	InChIKey=PVEOYINWKBTPIZ-UHFFFAOYSA-M	C=CCC(=O)[O-]
isovaleryl-CoA	2.72	0.06	0.05	0.06	0.06		a coenzyme A-activated compound	InChIKey=UYVZIWWBJMYRCD-ZMHDXICWSA-J	CC(CC(=O)SCCNC(=O)CCNC(=O)[C@H](O)C(C)(C)COP(=O)(OP(=O)(OC[C@H]1([C@@H](OP([O-])(=O)[O-])[C@@H](O)[C@@H](O1)N2(C3(N=CN=C(C(N=C2)=3)N))))[O-])[O-])C
3-oxo-3-phenylpropanoyl-CoA	2.98	0.06	0.05	3.68	0.06		a coenzyme A-activated compound // "a phenylpropanoid"	InChIKey=NHDPIYICCBKNNJ-FUEUKBNZSA-J	CC(C)([C@@H](O)C(=O)NCCC(=O)NCCSC(=O)CC(=O)C1(/C=CC=CC=1))COP(=O)(OP(=O)(OC[C@H]2([C@@H](OP([O-])(=O)[O-])[C@@H](O)[C@@H](O2)N3(C4(N=CN=C(C(N=C3)=4)N))))[O-])[O-]
(6R)-6-fluoro-5-enolpyruvoylshikimate 3-phosphate	5.58	0.07	0.05	0.07	0.07		a small molecule	InChIKey=IUMNLRGFWIEEHG-JQCXWYLXSA-K	C=C([O-])C(=O)O[C@H]1([C@@H](C(\\C(=O)[O-])=C/[C@@H]([C@H]1O)OP(C)(=O)[O-])F)
5-amino-1-(5-phospho-D-ribosyl)imidazole-4-carboxylate	5.6	0.07	0.05	0.07	0.07		a small molecule	InChIKey=XFVULMDJZXYMSG-ZIYNGMLESA-K	C(OP([O-])([O-])=O)[C@H]2([C@@H](O)[C@@H](O)[C@H](N1(C=NC(\\C([O-])=O)=C(N)/1))O2)
3S-(4-hydroxyphenyl)-3-hydroxy-propanoyl-CoA	2.87	0.07	5.88	0.07	0.07		a small molecule	InChIKey=VDDFXUMTXCQMFM-UGDQNKSBSA-J	CC(C)([C@@H](O)C(=O)NCCC(=O)NCCSC(=O)C[C@H](O)C1(/C=CC(\\O)=C/C=1))COP(=O)(OP(=O)(OC[C@H]2([C@@H](OP([O-])(=O)[O-])[C@@H](O)[C@@H](O2)N3(C4(N=CN=C(C(N=C3)=4)N))))[O-])[O-]
(indol-3-yl)acetamide	6.58	0.07	0.05	0.2	0.07		an indole derivative	InChIKey=ZOAMBXDOGPRZLP-UHFFFAOYSA-N	C(N)(=O)CC1(/C2(\\C=CC=CC(/NC=1)=2))
ADP	3.36	0.07	2.97	3.57	0.07		8-divinyl-chlorophyllide <i>a</i> biosynthesis I (aerobic	light-dependent)" // "L-leucine degradation I" // "glutathione biosynthesis" // "TCA cycle II (plants and fungi)" // "TCA cycle variation V (plant)" // "1	4-dihydroxy-2-naphthoate biosynthesis II (plants)" // "C4 photosynthetic carbon assimilation cycle	PEPCK type" // "superpathway of glyoxylate cycle and fatty acid degradation" // "&gamma;-glutamyl cycle" // "&gamma;-glutamyl cycle (plant pathway)" // "4-amino-2-methyl-5-diphosphomethylpyrimidine biosynthesis" // "superpathway of thiamine diphosphate biosynthesis III (eukaryotes)" // "ppGpp biosynthesis" // "pyrimidine deoxyribonucleotides <i>de novo</i> biosynthesis II" // "pyrimidine deoxyrib…	4	5)P<sub>3</sub>)" // "flavin biosynthesis I (bacteria and plants)" // "pyridoxal 5'-phosphate salvage I" // "pyridoxal 5'-phosphate salvage II (plants)" // "Calvin-Benson-Bassham cycle" // "Rubisco shunt" // "phosphopantothenate biosynthesis I" // "superpathway of coenzyme A biosynthesis II (plants)" // "phosphopantothenate biosynthesis II" // "hydroxymethylpyrimidine salvage" // "NAD/NADH phosph…	L-threonine and L-methionine biosynthesis II" // "superpathway of L-isoleucine biosynthesis I" // "guanine and guanosine salvage III" // "purine nucleosides salvage II (plant)" // "glycerol degradation I" // "photorespiration" // "D-galactose degradation I (Leloir pathway)" // "stachyose degradation" // "D-galactose detoxification" // "UDP-galactose biosynthesis (salvage pathway from galactose us…	pyruvate dehydrogenase and TCA cycle" // "<i>S</i>-methyl-5'-thioadenosine degradation I" // "L-methionine salvage cycle I (bacteria and plants)" // "L-methionine salvage cycle II (plants)" // "methylerythritol phosphate pathway I" // "taxadiene biosynthesis (engineered)" // "superpathway of ergosterol biosynthesis II" // "superpathway of geranylgeranyl diphosphate biosynthesis II (via MEP)" // "…	3	4)P3)" // "lipid-dependent phytate biosynthesis II (via Ins(1	3	4)P<sub>3</sub>)" // "superpathway of lipid-dependent phytate biosynthesis" // "1D-<i>myo</i>-inositol hexakisphosphate biosynthesis III (<i>Spirodela polyrrhiza</i>)" // "homoglutathione biosynthesis" // "UDP-&beta;-L-arabinose biosynthesis II (from &beta;-L-arabinose)" // "UDP-&alpha;-D-glucuronate biosynthesis (from <i>myo</i>-inositol)" // "UDP-&alpha;-D-galacturonate biosynthesis II (from D-…	as a signaling molecule (Chlamydomonas)" // "phosphatidate metabolism	as a signaling molecule" // "urea degradation I" // "starch biosynthesis" // "ammonia assimilation cycle II" // "L-glutamine biosynthesis III" // "nitrate reduction II (assimilatory)" // "L-glutamine biosynthesis I" // "ammonia assimilation cycle I" // "superpathway of ammonia assimilation (plants)" // "Organic Nitrogen Assimilation" // "Inorganic Nitrogen Assimilation" // "glutamate-glutamine sh…	4	5)P3)" // "superpathway of 1D-<i>myo</i>-inositol hexakisphosphate biosynthesis (plants)" // "D-<i>myo</i>-inositol (1	3	4)-trisphosphate biosynthesis" // "formate assimilation into 5	10-methylenetetrahydrofolate" // "folate polyglutamylation" // "tetrahydrofolate biosynthesis II" // "folate transformations II" // "UDP-<i>N</i>-acetyl-D-glucosamine biosynthesis II" // "sucrose biosynthesis II" // "trehalose degradation II (cytosolic)" // "GDP-glucose biosynthesis" // "sucrose degradation III (sucrose invertase)" // "superpathway of sucrose and starch metabolism I (non-photosyn…	6-bisphosphate biosynthesis" // "mannitol degradation II" // "guanosine deoxyribonucleotides <i>de novo</i> biosynthesis I" // "superpathway of guanosine nucleotides <i>de novo</i> biosynthesis I" // "adenosine deoxyribonucleotides <i>de novo</i> biosynthesis" // "superpathway of adenosine nucleotides <i>de novo</i> biosynthesis I" // "superpathway of purine nucleotides <i>de novo</i> biosynthesi…	4	5)-trisphosphate biosynthesis" // "biotin-carboxyl carrier protein assembly" // "crotonyl-CoA/ethylmalonyl-CoA/hydroxybutyryl-CoA cycle (engineered)" // "glutathione-mediated detoxification II" // "ornithine-citrulline shuttle" // "glutaminyl-tRNA<sup>gln</sup> biosynthesis via transamidation" // "L-asparagine biosynthesis III (tRNA-dependent)" // "ophthalmate biosynthesis" // "phytol salvage pat…	a purine ribonucleoside 5'-diphosphate // "a nucleic acid component"	InChIKey=XTWYTFMLZFPYCI-KQYNXXCUSA-K	C([C@H]3([C@H]([C@H]([C@H](N1(C2(N=CN=C(C(N=C1)=2)N)))O3)O)O))OP(OP(=O)([O-])[O-])([O-])=O
(<i>E</i>)-4-coumaroyl-CoA	9.21	0.07	0.09	3.68	0.07		odd number	di-isomerase-dependent)" // "fatty acid &beta;-oxidation III (unsaturated	odd number)" // "unsaturated	even numbered fatty acid &beta;-oxidation" // "methyl ketone biosynthesis (engineered)" // "fatty acid &beta;-oxidation II (peroxisome)" // "superpathway of glyoxylate cycle and fatty acid degradation" // "hinokiresinol biosynthesis" // "anthocyanidin modification (<i>Arabidopsis</i>)" // "flavonol acylglucoside biosynthesis I - kaempferol derivatives" // "flavonol acylglucoside biosynthesis II -…	a 3-(aryl)acryloyl-CoA // "a phenylpropanoid"	InChIKey=DMZOKBALNZWDKI-MATMFAIHSA-J	CC(C)([C@@H](O)C(=O)NCCC(=O)NCCSC(=O)C=CC1(C=CC(\\O)=C/C=1))COP(=O)(OP(=O)(OC[C@H]2([C@@H](OP([O-])(=O)[O-])[C@@H](O)[C@@H](O2)N3(C4(N=CN=C(C(N=C3)=4)N))))[O-])[O-]
malonyl-CoA	2.96	0.07	12.44	9.28	0.07		lower eukaryotes)" // "very long chain fatty acid biosynthesis II" // "phenolic malonylglucosides biosynthesis" // "glutathione-mediated detoxification II" // "olivetol biosynthesis" // "aloesone biosynthesis II" // "barbaloin biosynthesis" // "hyperxanthone E biosynthesis" // "tetrahydroxyxanthone biosynthesis (from benzoate)" // "sorgoleone biosynthesis" // "phloridzin biosynthesis" // "4-hydro…	a coenzyme A-activated compound	InChIKey=LTYOQGRJFJAKNA-DVVLENMVSA-I	CC(C)([C@@H](O)C(=O)NCCC(=O)NCCSC(=O)CC(=O)[O-])COP(=O)(OP(=O)(OC[C@H]1([C@@H](OP([O-])(=O)[O-])[C@@H](O)[C@@H](O1)N2(C3(N=CN=C(C(N=C2)=3)N))))[O-])[O-]
siroheme	11.95	0.08	0.09	0.08	0.08		a heme	InChIKey=DLKSSIHHLYNIKN-QIISWYHFSA-D	C[C@]4(CC(=O)[O-])([C@H](CCC(=O)[O-])C7(/[N+]5([Fe--]26([N+]1(C(\\C(\\CCC([O-])=O)=C(CC(=O)[O-])/C=1C=C3([C@@](C)(CC(=O)[O-])[C@H](CCC(=O)[O-])C(/N23)=C/C4=5))=C/C8(/N6C(\\C=7)=C(CC([O-])=O)/C(\\CCC(=O)[O-])=8))))))
(6S)-6-fluoro-5-enolpyruvoylshikimate 3-phosphate	5.58	0.08	3.11	0.08	0.08		a small molecule	InChIKey=IUMNLRGFWIEEHG-RBXMUDONSA-K	C=C([O-])C(=O)O[C@H]1([C@H](C(\\C(=O)[O-])=C/[C@@H]([C@H]1O)OP(C)(=O)[O-])F)
4-amino-2-trifluoromethyl 5-hydroxymethylpyrimidine pyrophosphate	8.75	0.08	3.17	0.08	0.08		a small molecule	InChIKey=UKNJCTHTCAKKNG-UHFFFAOYSA-K	C(OP(=O)([O-])OP(=O)([O-])[O-])C1(/C(N)=NC(C(F)(F)F)=NC=1)
3,5-dioxodecanoyl-CoA	3.03	0.03	0.04	0.06	0.08		a coenzyme A-activated compound	InChIKey=CFIAMSAKPMQXNK-HSJNEKGZSA-J	CCCCCC(=O)CC(=O)CC(=O)SCCNC(=O)CCNC(=O)[C@H](O)C(C)(C)COP(=O)(OP(=O)(OC[C@H]1([C@@H](OP([O-])(=O)[O-])[C@@H](O)[C@@H](O1)N2(C3(N=CN=C(C(N=C2)=3)N))))[O-])[O-]
pimeloyl-CoA	2.95	0.03	6.08	0.07	0.08		a small molecule	InChIKey=LYCRXMTYUZDUGA-UYRKPTJQSA-I	CC(C)([C@@H](O)C(=O)NCCC(=O)NCCSC(CCCCCC([O-])=O)=O)COP(=O)(OP(=O)(OC[C@H]1([C@@H](OP([O-])(=O)[O-])[C@@H](O)[C@@H](O1)N2(C3(N=CN=C(C(N=C2)=3)N))))[O-])[O-]
3-methylglutaconyl-CoA	10.3	0.03	6.23	0.08	0.08		a coenzyme A-activated compound	InChIKey=GXKSHRDAHFLWPN-RKYLSHMCSA-I	CC(\\CC(=O)[O-])=C/C(=O)SCCNC(=O)CCNC(=O)[C@H](O)C(C)(C)COP(=O)(OP(=O)(OC[C@H]1([C@@H](OP([O-])(=O)[O-])[C@@H](O)[C@@H](O1)N2(C3(N=CN=C(C(N=C2)=3)N))))[O-])[O-]
(4-hydroxyphenyl)acetonitrile	11.78	0.03	0.05	0.2	0.08		an aromatic nitrile	InChIKey=AYKYOOPFBCOXSL-UHFFFAOYSA-N	C(CC1(/C=CC(\\O)=C/C=1))#N
3-oxo-2-(cis-2'-pentenyl)-cyclopentane-1-(3-oxohexanoyl)-CoA	11.37	0.03	0.05	0.2	0.08	*	a coenzyme A-activated compound	InChIKey=ADGIRVMSHGGGHU-AZVXSVFWSA-J	CCC=CC[C@@H]1([C@H](CCC(=O)1)CCCC(=O)CC(SCCNC(=O)CCNC(=O)[C@H](O)C(C)(C)COP(=O)(OP(=O)(OC[C@H]2([C@@H](OP([O-])(=O)[O-])[C@@H](O)[C@@H](O2)N3(C4(N=CN=C(C(N=C3)=4)N))))[O-])[O-])=O)
Bz<sub>2</sub>ATP	19.27	9.45	13.2	15.25	0.08		a small molecule	InChIKey=AWJJLYZBWRIBCZ-UGTJMOTHSA-J	C([C@H]3([C@H]([C@@H](O)[C@H](N1(C2(N=CN=C(C(N=C1)=2)N)))O3)OC(C5(/C=CC(\\C(=O)C4(/C=CC=CC=4))=C/C=5))=O))OP(OP(OP(=O)([O-])[O-])([O-])=O)([O-])=O
5,5'-dithio-bis-2-nitrobenzoate	0.1	0.1	2.94	0.1	0.1		a C-nitro compound	InChIKey=KIUMMUBSPKGMOY-UHFFFAOYSA-L	C2(\\C=C(C(\\C(=O)[O-])=C/C(\\SSC1(/C=C(C(=O)[O-])C(\\[N+]([O-])=O)=C/C=1))=2)[N+]([O-])=O)
D-<i>myo</i>-inositol (3,5,6)-trisphosphate	0.1	0.1	2.96	0.1	0.1		a <i>myo</i>-inositol trisphosphate	InChIKey=MMWCIQZXVOZEGG-HOZKJCLWSA-H	[C@@H]1(O)([C@@H](O)[C@H](OP([O-])(=O)[O-])[C@@H](OP([O-])(=O)[O-])[C@H](O)[C@@H](OP(=O)([O-])[O-])1)
dIDP	0.1	0.1	3.02	0.1	0.1		a purine 2'-deoxyribonucleoside 5'-diphosphate // "a nucleic acid component"	InChIKey=BKUSIKGSPSFQAC-RRKCRQDMSA-K	C(OP(=O)([O-])OP(=O)([O-])[O-])[C@@H]1(O[C@H](C[C@H](O)1)N2(C=NC3(C(=O)NC=NC2=3)))
adenosine 3',5'-bisphosphate	0.1	0.1	3.04	0.1	0.1		a small molecule	InChIKey=WHTCPDAXWFLDIH-KQYNXXCUSA-J	C([C@H]3([C@H]([C@H]([C@H](N1(C2(N=CN=C(C(N=C1)=2)N)))O3)O)OP(=O)([O-])[O-]))OP([O-])([O-])=O
quercetin 3-sulfate	0.1	0.1	3.09	0.1	0.1		a small molecule	InChIKey=DNAYVNOVGHZZLH-UHFFFAOYSA-L	C3(/C(\\C1(\\OC2(/C(/C(C(\\OS(=O)(=O)[O-])=1)=O)=C(C=C(C=2)[O-])/O)))=C/C(/O)=C(C=3)/O)
UDP group	0.1	0.1	3.18	0.1	0.1		a nucleoside phosphate group		C(OP(=O)([O-])OP(=O)(O)[O-])[C@@H]1(O[C@H]([C@H](O)[C@H](O)1)N2(C=CC(=O)NC(=O)2))
CTP	0.1	0.1	3.28	0.1	0.1		a pyrimidine ribonucleoside 5'-triphosphate // "a pyrimidine"	InChIKey=PCDQPRRSZKQHHS-XVFCMESISA-J	C(OP([O-])(=O)OP([O-])(=O)OP([O-])(=O)[O-])[C@@H]1(O[C@H]([C@H](O)[C@H](O)1)N2(C=CC(N)=NC(=O)2))
3-oxo-myristoyl-CoA	19.87	0.16	17.11	0.11	0.11	*	a long-chain 3-oxoacyl-CoA	InChIKey=IQNFBGHLIVBNOU-QSGBVPJFSA-J	CCCCCCCCCCCC(=O)CC(=O)SCCNC(=O)CCNC(=O)[C@H](O)C(C)(C)COP(=O)(OP(=O)(OC[C@H]1([C@@H](OP([O-])(=O)[O-])[C@@H](O)[C@@H](O1)N2(C3(N=CN=C(C(N=C2)=3)N))))[O-])[O-]
phytate	0.12	0.12	2.93	5.84	0.12		3	4)P3)" // "superpathway of 1D-<i>myo</i>-inositol hexakisphosphate biosynthesis (plants)" // "lipid-dependent phytate biosynthesis II (via Ins(1	3	4)P<sub>3</sub>)" // "lipid-dependent phytate biosynthesis I (via Ins(1	4	5)P<sub>3</sub>)" // "superpathway of lipid-dependent phytate biosynthesis" // "1D-<i>myo</i>-inositol hexakisphosphate biosynthesis III (<i>Spirodela polyrrhiza</i>)" // "phosphate acquisition" // "phytate degradation II" // "phytate degradation I"	a <i>myo</i>-inositol-polyphosphate	InChIKey=IMQLKJBTEOYOSI-GPIVLXJGSA-B	[C@@H]1(OP([O-])([O-])=O)([C@H](OP([O-])(=O)[O-])[C@@H](OP([O-])(=O)[O-])[C@H](OP(=O)([O-])[O-])[C@@H](OP(=O)([O-])[O-])[C@@H](OP([O-])([O-])=O)1)
hamamelose-2<sup>1</sup>,5-bisphosphate	0.1	3.5	0.1	0.45	0.12		a pentose phosphate		C([C@H]1([C@H]([C@](COP(O)(=O)O)([C@@H](O1)O)O)O))OP(O)(O)=O
<i>P</i><sup>1</sup>,<i>P</i><sup>5</sup>-<i>bis</i>(5'-adenosyl) pentaphosphate	17.9	3.31	0.12	0.16	0.15		a diadenosine polyphosphate	InChIKey=OIMACDRJUANHTJ-XPWFQUROSA-I	C([C@H]3([C@H]([C@H]([C@H](N1(C2(N=CN=C(C(N=C1)=2)N)))O3)O)O))OP(=O)([O-])OP(=O)([O-])OP(=O)([O-])OP(=O)([O-])OP(OC[C@H]6([C@H]([C@H]([C@H](N4(C5(N=CN=C(C(N=C4)=5)N)))O6)O)O))(=O)[O-]
stearidonoyl-CoA	15.56	0.11	0.13	0.29	0.15	*	a coenzyme A-activated compound	InChIKey=DDHCSALWDPRVCN-USWKVXSKSA-J	CCC=CCC=CCC=CCC=CCCCCC(=O)SCCNC(=O)CCNC(=O)[C@H](O)C(C)(C)COP(=O)(OP(=O)(OC[C@H]1([C@@H](OP([O-])(=O)[O-])[C@@H](O)[C@@H](O1)N2(C3(N=CN=C(C(N=C2)=3)N))))[O-])[O-]
neryl cation	17.25	0.1	0.1	0.14	0.16		a monoterpenoid		CC(C)=CCCC(\\C)=C/[C+]
uridine-5'-diphosphate chloroacetol	-2.97	-0.07	0.08	-2.85	0.16		a pyrimidine	InChIKey=RTOKQNPULGAVTE-QCNRFFRDSA-L	C(Cl)C(=O)COP(=O)([O-])OP(=O)([O-])OC[C@@H]1(O[C@H]([C@H](O)[C@H](O)1)N2(C=CC(=O)NC(=O)2))
rutin	7.07	6.97	3.56	-6.33	0.17		a flavonol 3-O-[&alpha;-L-rhamnosyl-(1->6)-&beta;-D-glucoside]	InChIKey=IKGXIBQEEMLURG-NVPNHPEKSA-N	C[C@@H]1([C@H](O)[C@@H](O)[C@@H](O)[C@@H](O1)OC[C@H]2([C@@H](O)[C@H](O)[C@@H](O)[C@@H](O2)OC4(/C(=O)C5(\\C(\\O)=C/C(\\O)=C/C(/OC(/C3(/C=C(O)C(\\O)=C/C=3))=4)=5))))
(2<i>R</i>,3<i>S</i>)-&beta;-methylmalyl-CoA	18.47	0.19	0.12	0.19	0.19	*	a coenzyme A-activated compound	InChIKey=OTENCPQKSBPYCM-GQCNFOOOSA-I	C[C@H]([C@@H](C(=O)[O-])O)C(=O)SCCNC(=O)CCNC(=O)[C@H](O)C(C)(C)COP(=O)(OP(=O)(OC[C@H]1([C@@H](OP([O-])(=O)[O-])[C@@H](O)[C@@H](O1)N2(C3(N=CN=C(C(N=C2)=3)N))))[O-])[O-]
1,2-di-O-sinapoyl-&beta;-D-glucose	-14.1	3.89	3.93	-13.25	0.22		a small molecule	InChIKey=KQDOTXAUJBODDM-STUNQXDBSA-N	COC1(/C(/O)=C(C=C(C=1)C=CC(O[C@@H]3([C@H](OC(C=CC2(C=C(C(/O)=C(C=2)/OC)OC))=O)O[C@H](CO)[C@H]([C@@H]3O)O))=O)/OC)
(2R)-2-hydroxy-2-methylbutanenitrile	-11.11	-3.59	-3.88	-22.18	0.26		2-hydroxy-2-methylbutanenitrile // "an aliphatic (<i>R</i>)-hydroxynitrile"	InChIKey=VMEHOTODTPXCKT-YFKPBYRVSA-N	CC[C@](C)(O)C#N
laurate	1.09	0.57	0.21	0.14	0.27	*	a medium-chain 2,3,4-saturated fatty acid // "a saturated fatty acid"	InChIKey=POULHZVOKOAJMA-UHFFFAOYSA-M	CCCCCCCCCCCC([O-])=O
5-hydroxy-8-methoxypsoralen	-15.69	0.29	-19.44	-6.2	0.3		a small molecule		C1(=O)(OC2(\\C(/C=C1)=C(C3(/C=COC(/C(/OC)=2)=3))/O))
tricetin	-13.33	2.93	7.08	-13.02	0.36		a pentahydroxyflavone // "a 3'-hydroxyflavone"	InChIKey=ARSRJFRKVXALTF-UHFFFAOYSA-M	C3(\\C(/O)=C(C(\\O)=C/C(\\C1(/OC2(\\C=C([O-])C=C(O)C(/C(=O)C=1)=2)))=3)/O)
8-oxo-dGMP	0.45	0.74	0.33	0.85	0.42		a nucleic acid component	InChIKey=AQIVLFLYHYFRKU-VPENINKCSA-L	C(OP(=O)([O-])[O-])[C@@H]1(O[C@H](C[C@H](O)1)N2(C(=O)NC3(C(=O)NC(N)=NC2=3)))
bixin dimethyl ester	0.35	1.5	-0.07	0.3	0.43	*	a ketocarotenoid // "a carboxylic ester"	InChIKey=UNTSJRBZLAUZBX-VBBCTIIMSA-N	CC(\\C=CC=C(C=CC(OC)=O)C)=C/C=CC=C(C=CC=C(C=CC(OC)=O)C)C
7-hydroxy-2',4',5'-trimethoxyisoflavone	0.45	0.47	0.03	2.36	0.56	*	an isoflavone	InChIKey=IXZYJZHCXHSCDY-UHFFFAOYSA-N	COC3(\\C=C(C(\\C1(/C(=O)C2(\\C=CC(\\O)=C/C(/OC=1)=2)))=C/C(/OC)=3)OC)
indigo	7.05	7.08	-9.29	-6.4	0.6		an indole // "a dye"	InChIKey=COHYTHOBJLSHDF-BUHFOSPRSA-N	C1(/C=CC2(/NC(/C(=O)C(\\C=1)=2)=C3(C(=O)C4(\\C=CC=CC(/N3)=4))))
<i>cis</i>-tuberonic acid	7.78	-6.86	-14.22	-10.34	0.69		tuberonic acid	InChIKey=RZGFUGXQKMEMOO-SZXTZRQCSA-M	C(O)CC=CC[C@H]1(C(=O)CC[C@@H]1CC([O-])=O)
lesqueroloyl-CoA	1.17	0.46	0.48	-14.04	0.84		a coenzyme A-activated compound	InChIKey=JJYIVZKVZZSDMC-GXVFDTDKSA-J	CCCCCC[C@@H](O)CC=CCCCCCCCCCC(=O)SCCNC(=O)CCNC(=O)[C@H](O)C(C)(C)COP(=O)(OP(=O)(OC[C@H]1([C@@H](OP([O-])(=O)[O-])[C@@H](O)[C@@H](O1)N2(C3(N=CN=C(C(N=C2)=3)N))))[O-])[O-]
all-<i>trans</i>-geranyl-geranyl monophosphate	0.04	0.56	-0.13	-0.67	0.85	*	a polyprenol phosphate // "an all-<i>trans</i>-isoprenoid phosphate"	InChIKey=VHUBNUSXPIJYSG-QIRCYJPOSA-L	CC(C)=CCCC(/C)=C/CCC(/C)=C/CCC(/C)=C/COP(=O)([O-])[O-]
6-hydroxy-2-(4-glucosyl-phenoxymethylene)-benzofuran-3-one	0.4	-6.59	-0.38	-5.6	0.89		an aurone	InChIKey=OIZZVOLGZMHZEV-AXJSTMCESA-N	C(/OC2(/C=CC(\\O[C@@H]1([C@@H]([C@H]([C@H](O)[C@H](O1)CO)O)O))=C/C=2))=C3(C(=O)C4(/C(\\O3)=C/C(\\O)=C/C=4))
L-thiazolidine-4-carboxylate	-15.29	0.81	0.48	-2.13	0.92		a small molecule	InChIKey=DZLNHFMRPBPULJ-UHFFFAOYSA-M	C1(SCNC(C(=O)[O-])1)
(-)-jasmonoyl-L-valine	0.18	0.63	-0.22	0.54	0.97		a jasmonoyl-L-valine	InChIKey=LZPFFKBGBPBJAW-JSIGFUFCSA-M	CCC=CC[C@@H]1(C(=O)CC[C@@H]1CC(N[C@@H](C(C)C)C([O-])=O)=O)
(5Z,8Z,11Z,14Z,17Z)-3-oxodocosapentaenoyl-CoA	5.43	1.31	-8.77	-14.25	1.11	*	a small molecule	InChIKey=SLYKKQSPRFJDAF-HVGANWHPSA-J	CCC=CCC=CCC=CCC=CCC=CCCCC(=O)CC(=O)SCCNC(=O)CCNC(=O)[C@H](O)C(C)(C)COP(=O)(OP(=O)(OC[C@H]1([C@@H](OP([O-])(=O)[O-])[C@@H](O)[C@@H](O1)N2(C3(N=CN=C(C(N=C2)=3)N))))[O-])[O-]
5,7-dihydroxy-2-methylchromone	0.36	1.44	0.22	1.25	1.22		a polyketide	InChIKey=NCUJRUDLFCGVOE-UHFFFAOYSA-N	CC1(/OC2(\\C=C(O)C=C(O)C(/C(=O)C=1)=2))
juglone	0.23	1.45	0.23	1.28	1.23		a quinone	InChIKey=KQPYUDDGWXQXHS-UHFFFAOYSA-N	C1(/C=C(C2(/C(=O)C=CC(C(\\C=1)=2)=O))O)
allosamidin	0.34	1.17	0.28	1.1	1.33		a small molecule	InChIKey=MDWNFWDBQGOKNZ-XYUDZHFQSA-N	CC(N[C@H]1([C@@H]([C@@H]([C@@H](CO)O[C@H]1O[C@H]2([C@@H](CO)O[C@H]([C@@H]([C@@H]2O)NC(C)=O)O[C@@H]3([C@@H]([C@H]4([C@H]([C@H](CO)3)OC(N(C)C)=N4))O)))O)O))=O
1-O,6-O-digalloyl-&beta;-D-glucose	0.18	1.5	0.34	1.5	1.33	*	a hydrolyzable tannin	InChIKey=LYGRISUQIZNHGM-IVABAYMNSA-N	C([C@H]1([C@H]([C@@H]([C@H]([C@@H](O1)OC(C2(/C=C(C(/O)=C(C=2)/O)O))=O)O)O)O))OC(C3(/C=C(C(/O)=C(C=3)/O)O))=O
cetyltrimethylammonium	1.33	1.24	0.21	1.37	1.38	*	an organic cation // "a quaternary amine"	InChIKey=RLGQACBPNDBWTB-UHFFFAOYSA-N	CCCCCCCCCCCCCCCC[N+](C)(C)C
sphinganine 1-phosphate	0.63	0.77	-0.13	0.56	1.4		a sphingoid 1-phosphate	InChIKey=YHEDRJPUIRMZMP-ZWKOTPCHSA-M	CCCCCCCCCCCCCCC[C@H]([C@H](COP([O-])(=O)[O-])[N+])O
narirutin	-5.78	-1.98	2.03	-12.45	1.45	*	a small molecule	InChIKey=HXTFHSYLYXVTHC-AJHDJQPGSA-N	C[C@H]1(O[C@H]([C@H](O)[C@H](O)[C@@H](O)1)OC[C@H]2([C@@H](O)[C@H](O)[C@@H](O)[C@@H](O2)OC4(/C=C(O)C5(/C(=O)C[C@@H](C3(/C=CC(\\O)=C/C=3))OC(\\C=4)=5))))
9'-<i>cis</i>-neoxanthin	-18.37	6.05	-8.87	-18.01	1.46	*	a 9-<i>cis</i>-epoxycarotenoid	InChIKey=PGYAYSRVSAJXTE-OQASCVKESA-N	CC(\\C=CC=C(C)[CH]\\=C/=C1([C@@](O)(C)C[C@@H](O)CC(C)(C)1))=C/C=CC=C(C)C=CC=C(C)C=C[C@@]23(C(C)(C)C[C@H](O)C[C@@](C)(O2)3)
baicalein	0.04	1.75	-0.06	1.7	1.64	*	a flavone	InChIKey=FXNFHKRTJBSTCS-UHFFFAOYSA-N	C3(/C=CC(\\C1(/OC2(\\C=C(O)C(/O)=C(C(/C(=O)C=1)=2)/O)))=C/C=3)
p-coumaroyltriacetate	0.04	1.75	-0.04	1.68	1.64	*	a small molecule	InChIKey=YGTSJOBIWGILCS-ZZXKWVIFSA-M	C(CC(CC(CC(C=CC1(C=CC(\\O)=C/C=1))=O)=O)=O)([O-])=O
AMP group	0.12	1.56	0.15	1.42	1.7	*	a nucleoside phosphate group		C([C@H]3([C@H]([C@H]([C@H](N1(C2(N=CN=C(C(N=C1)=2)N)))O3)O)O))OP([O-])([O-])=O
(+)-neomenthol	4.49	5.24	1.27	-8.05	2.06	*	a monoterpenol	InChIKey=NOOLISFMXDJSKH-UTLUCORTSA-N	CC([C@H]1(CC[C@H](C[C@@H]1O)C))C
(L-cysteinylglycin-<i>S</i>-yl)(1<i>H</i>-indol-3-yl)acetonitrile	-0.33	2.25	-0.5	2.17	2.1	*	an (L-cysteinylglycine)-<i>S</i>-conjugate // "a nitrile"	InChIKey=KRSCQOPJLNSQDL-AMGKYWFPSA-N	C1(\\NC2(\\C=CC=CC(/C(\\C(SC[C@@H](C(=O)NCC([O-])=O)[N+])C#N)=1)=2))
dihydrolipoate	0.18	2	0.39	2.39	2.17		a small molecule	InChIKey=IZFHEQBZOYJLPK-SSDOTTSWSA-M	C(S)C[C@H](S)CCCCC(=O)[O-]
4'-phosphopantetheine group	-18.71	-1.37	-6.11	-8.06	2.29		Superatoms		CC([C@@H](O)C(=O)NCCC(NCCS)=O)(C)COP([O-])(=O)[O-]
ayapin	-0.15	2.24	0.23	2.2	2.33	*	a coumarin		C1(C=CC2(/C(\\O1)=C/C3(/OCOC(\\C=2)=3)))(=O)
7,2,2'-trihydroxy-4',5'-methylenedioxyisoflav-3-ene	0.36	2.38	0.25	2.3	2.46	*	an organic heterobicyclic compound	InChIKey=HQMOTYNSXCURDB-INIZCTEOSA-N	C1(OC2(/C(\\O1)=C/C(/O)=C(C=2)/[C@]3(O)(CC4(\\C=CC(\\O)=C/C(\\OC3)=4))))
robustaquinone D	0.37	2.38	0.25	2.31	2.47	*	a hydroxyanthraquinone	InChIKey=BVNMMZKNCPOEFW-UHFFFAOYSA-N	CC1(\\C=CC2(/C(=O)C3(\\C=C(OC)C(\\O)=C/C(/C(=O)C(\\C(\\O)=1)=2)=3)))
D-<i>myo</i>-inositol (2,4) bisphosphate		2.79			2.87		a <i>myo</i>-inositol bisphosphate	InChIKey=PUVHMWJJTITUGO-PTQMNWPWSA-J	[C@@H]1(O)([C@@H](O)[C@H](OP(=O)([O-])[O-])[C@@H](O)[C@@H](OP([O-])([O-])=O)[C@@H](O)1)
hydroxymethyl-dCDP	-0.09	-2.78	0.23	-2.74	2.97		a pyrimidine	InChIKey=RQKDPSTWKKMBPM-XLPZGREQSA-K	C(O)C2(/C(=NC(N([C@@H]1(C[C@@H]([C@H](O1)COP(OP(=O)([O-])[O-])([O-])=O)O))C=2)=O)N)
IDP	0.1	0.08	0.09	3.1	2.98		a purine ribonucleoside 5'-diphosphate // "a nucleic acid component"	InChIKey=JPXZQMKKFWMMGK-KQYNXXCUSA-K	C(OP(=O)([O-])OP([O-])(=O)[O-])[C@@H]1(O[C@H]([C@H](O)[C@H](O)1)N2(C=NC3(C(=O)NC=NC2=3)))
thiamine diphosphate		3.54			3.02		pyruvate dehydrogenase and TCA cycle" // "TCA cycle variation V (plant)"	a small molecule	InChIKey=AYEKOFBPNLCAJY-UHFFFAOYSA-L	CC1(/[N+](=CSC(\\CCOP([O-])(=O)OP([O-])(=O)[O-])=1)CC2(/C=NC(C)=NC(\\N)=2))
CDP group	0.1	0.08	3.07	0.1	3.04		a nucleoside phosphate group		C([C@H]2([C@H]([C@H]([C@H](N1(C(N=C(C=C1)N)=O))O2)O)O))OP(OP([O-])(=O)O)([O-])=O
3-amino-1-hydroxyacetone 1-phosphate	-0.05	0.03	0.05	0.05	3.04		a small molecule	InChIKey=HIQNVODXENYOFK-UHFFFAOYSA-M	C(C(=O)C[N+])OP(=O)([O-])[O-]
4-phosphooxy-L-threonine		3.06			3.06		a small molecule	InChIKey=FKHAKIJOKDGEII-GBXIJSLDSA-L	C(=O)([O-])[C@@H]([N+])[C@H](O)COP([O-])(=O)[O-]
<i>trans</i>-aconitate	0.1	3.04	3.7	0.1	3.07		a tricarboxylate	InChIKey=GTZCVFVGUGFEME-HNQUOIGGSA-K	C([O-])(=O)C=C(C([O-])=O)CC([O-])=O
dUDP	0.12	0.08	3.3	6.31	3.16		a pyrimidine 2'-deoxyribonucleoside 5'-diphosphate // "a pyrimidine"	InChIKey=QHWZTVCCBMIIKE-SHYZEUOFSA-K	C(OP(=O)([O-])OP(=O)([O-])[O-])[C@@H]1(O[C@H](C[C@H](O)1)N2(C=CC(=O)NC(=O)2))
(2<i>E</i>6<i>E</i>,10<i>E</i>,14<i>E</i>,18<i>E</i>,22<i>E</i>)-lycopahexaene	-0.14	-0.05	-0.03	3.84	3.25		a hydrocarbon // "a tetraterpenoid"	InChIKey=KMHKIEPZTSCFEX-UBAVNZOLSA-N	CC(C)=CCCC(/C)=C/CCC(/C)=C/CCC(/C)=C/CCC=C(C)CCC=C(C)CCC[C@H](C)CCCC(C)C
(1R)-trans-chrysanthemate	0.13	3.49	-0.15	3.87	3.49	*	a small molecule	InChIKey=XLOPRKKSAJMMEW-SFYZADRCSA-M	CC(C)=C[C@H]1([C@@H](C(=O)[O-])[C@]1(C)C)
UTP	0.13	2.89	2.96	7.18	3.53		a pyrimidine ribonucleoside 5'-triphosphate // "a pyrimidine"	InChIKey=PGAVKCOVUIYSFO-XVFCMESISA-J	C(OP(=O)([O-])OP(=O)([O-])OP(=O)([O-])[O-])[C@@H]1(O[C@H]([C@H](O)[C@H](O)1)N2(C=CC(=O)NC(=O)2))
4-hydroxylamino-2,6-dinitrotoluene-O-glucoside	-6.96	0.12	-10.19	-10.03	3.88		a C-nitro compound // "an aromatic compound"	InChIKey=YBIKXELGQAEZAC-HENWMNBSSA-N	CC2(\\C(\\[N+](=O)[O-])=C/C(\\NOC1([C@H](O)[C@@H](O)[C@H](O)[C@@H](CO)O1))=C/C(\\[N+]([O-])=O)=2)
(2E,8Z,11Z,14Z)-icosatetraenoyl-CoA	-11.53	3.96	-3.69	-0.46	3.94		a coenzyme A-activated compound	InChIKey=WQDZFNIBNFNRLF-XBLGNFGOSA-J	CCCCCC=CCC=CCC=CCCCCC=CC(=O)SCCNC(=O)CCNC(=O)[C@H](O)C(C)(C)COP(=O)(OP(=O)(OC[C@H]1([C@@H](OP([O-])(=O)[O-])[C@@H](O)[C@@H](O1)N2(C3(N=CN=C(C(N=C2)=3)N))))[O-])[O-]
(+)-7-<i>epi</i>-12-hydroxyjasmonoyl-L-phenylalanine	-15.5	-0.09	-7.08	-15.25	3.97		a 12-hydroxyjasmonoyl-L-amino acid	InChIKey=VDKUVTCFUXVZCC-QLAVEODCSA-M	C(O)CC=CC[C@H]1(C(=O)CC[C@@H]1CC(N[C@@H](CC2(/C=CC=CC=2))C([O-])=O)=O)
linalyl 6-<i>O</i>-&alpha;-<i>L</i>-arabinopyranosyl- &beta;-<i>D</i>-glucopyranoside	-0.02	4.38	-12.62	8.79	4.23		a monoterpenol // "a carbohydrate derivative"	InChIKey=OKNPZRJNRSGKME-AVIYVUCBSA-N	C=CC(O[C@@H]1([C@@H]([C@H]([C@H](O)[C@H](O1)CO[C@@H]2([C@@H]([C@@H](O)[C@H](CO2)O)O))O)O))(C)CCC=C(C)C
xanthine	0.65	4.67	-9.38	-17.1	4.73		a small molecule	InChIKey=LRFVTYWOQMYALW-UHFFFAOYSA-N	C12(NC(=O)NC(C(N=CN1)=2)=O)
(+)-6a-hydroxymaackiain	-6.56	1.43	-6.64	-12.7	4.84	*	a pterocarpan	InChIKey=GLMPLZUBQDAZEN-CVEARBPZSA-N	C2([C@@]1(C4(C(\\O[C@@H]1C3(/C(\\O2)=C/C(\\O)=C/C=3))=C/C5(/OCOC(\\C=4)=5)))(O))
shisonin	-13.03	-1	6.67	5.03	5.02	*	an anthocyanidin 3,5-di-<i>O</i>-&beta;-D-glucoside	InChIKey=YPXWWSJGANMFFQ-AQAMAIGXSA-N	C([C@@H]6(O[C@@H](OC1(/C2(/C=C(C(=[O+]C(/C=C(C=1)[O-])=2)C3(/C=CC(/O)=C(C=3)/O))O[C@H]4(O[C@@H]([C@H]([C@@H]([C@H]4O)O)O)COC(C=CC5(C=CC(\\O)=C/C=5))=O))))[C@@H]([C@H]([C@@H]6O)O)O))O
guanosine 2',3'-cyclic monophosphate	-9.35	8.35	-6.23	-4.93	5.12		a nucleoside cyclic phosphate // "a nucleoside cyclic monophosphate" // "a ribonucleoside 2'	3'-cyclic phosphate" // "a nucleic acid component"	InChIKey=UASRYODFRYWBRC-UUOKFMHZSA-M	C(O)[C@@H]2(O[C@H]([C@H]1(OP([O-])(=O)O[C@@H]12))N3(C=NC4(C(=O)NC(N)=NC3=4)))
(3R,11Z,14Z,17Z)-3-hydroxyicosatrienoyl-CoA	-15.9	2.52	7.92	6.6	5.58		a coenzyme A-activated compound	InChIKey=AUKMTTJFPKEFDQ-IVICTRQZSA-J	CCC=CCC=CCC=CCCCCCCC[C@@H](O)CC(=O)SCCNC(=O)CCNC(=O)[C@H](O)C(C)(C)COP(=O)(OP(=O)(OC[C@H]1([C@@H](OP([O-])(=O)[O-])[C@@H](O)[C@@H](O1)N2(C3(N=CN=C(C(N=C2)=3)N))))[O-])[O-]
dithioerythritol		5.9			5.61		a small molecule	InChIKey=VHJLVAABSRFDPM-ZXZARUISSA-N	C(S)[C@H](O)[C@H](O)CS
5-iodo-dCTP	0.13	0.08	3.03	5.99	5.63		an iodoaromatic compound	InChIKey=OOMLBPVHGFQCCL-RRKCRQDMSA-J	C([C@H]2([C@H](C[C@H](N1(C(N=C(C(\\I)=C/1)N)=O))O2)O))OP(OP(OP([O-])([O-])=O)([O-])=O)([O-])=O
succinate	0.16	8.44	3.19	6.24	5.65		non C-13 hydroxylation)" // "anthocyanin biosynthesis (delphinidin 3-O-glucoside)" // "gibberellin inactivation I (2&beta;-hydroxylation)" // "hyoscyamine and scopolamine biosynthesis" // "superpathway of hyoscyamine and scopolamine biosynthesis" // "hydroxylated mugineic acid phytosiderophore biosynthesis" // "gibberellin biosynthesis III (early C-13 hydroxylation)" // "morphine biosynthesis" //…	vindorosine and vinblastine biosynthesis" // "L-lysine degradation I" // "homocysteine and cysteine interconversion" // "superpathway of glyoxylate cycle and fatty acid degradation" // "aerobic respiration III (alternative oxidase pathway)" // "aerobic respiration I (cytochrome c)" // "reductive TCA cycle I" // "TCA cycle II (plants and fungi)" // "superpathway of cytosolic glycolysis (plants)	pyruvate dehydrogenase and TCA cycle" // "TCA cycle variation V (plant)"	a C4-dicarboxylate	InChIKey=KDYFGRWQOYBRFD-UHFFFAOYSA-L	C(C([O-])=O)CC([O-])=O
L-homocysteate		5.87		3.62	5.76		a sulfonate	InChIKey=VBOQYPQEPHKASR-UHFFFAOYSA-M	C(=O)([O-])C([N+])CCS(=O)(=O)[O-]
CDP	0.1	0.08	3.24	0.1	5.89		a pyrimidine ribonucleoside 5'-diphosphate // "a pyrimidine"	InChIKey=ZWIADYZPOWUWEW-XVFCMESISA-K	C([C@H]2([C@H]([C@H]([C@H](N1(C(N=C(C=C1)N)=O))O2)O)O))OP(OP([O-])([O-])=O)([O-])=O
3-methylphosphoenolpyruvate	0.1	3.04	2.89	0.1	6.14		a small molecule	InChIKey=FGYIHYXZLMDROB-IHWYPQMZSA-K	CC=C(C([O-])=O)OP([O-])([O-])=O
dolichol-group	13.13	3.1	-2.78	-5.49	6.18		a polyprenol group		CC[C@@H](C)CCC=C(C)CCC=C(C)CCC=C(C)CCC=C(C)CCC=C(C)CCC=C(C)CCC=C(C)CCC=C(C)CCC=C(C)CCC=C(C)CCC=C(C)CCC=C(C)CCC=C(C)CCC=C(C)CCC=C(C)C
campest-4-en-3&beta;-ol	-16.2	8.45	7.19	-3.53	6.45	*	a 3-oxosteroid	InChIKey=CPQUIAPJXYFMHN-PODYLUTMSA-N	CC(C)[C@H](C)CC[C@@H](C)[C@@H]3(CC[C@@H]4([C@H]2(CCC1(/[C@@](CC[C@H](O)C=1)(C)[C@H]2CC[C@](C)34))))
(+)-carvone	7.1	6.66	7.38	7.78	6.66	*	a carvone	InChIKey=ULDHMXUKGWMISQ-VIFPVBQESA-N	C=C([C@H]1(CC(C(\\C)=C/C1)=O))C
2-oxovalerate	-2.36	6.77	-2.37	4.05	6.95		a 2-oxo carboxylate	InChIKey=KDVFRMMRZOCFLS-UHFFFAOYSA-M	CCCC(=O)C(=O)[O-]
3-oxoicosanoyl-CoA	-14.67	-14.59	6.6	-14.42	6.96	*	a long-chain 3-oxoacyl-CoA	InChIKey=FYBVHNZJDVUVLJ-IBYUJNRCSA-J	CCCCCCCCCCCCCCCCCC(=O)CC(=O)SCCNC(=O)CCNC([C@H](O)C(C)(C)COP([O-])(=O)OP([O-])(=O)OC[C@H]1([C@@H](OP(=O)([O-])[O-])[C@@H](O)[C@@H](O1)N2(C=NC3(C(N)=NC=NC2=3))))=O
8-hydroxykaempferol	-13.33	6.19	7.08	-1.23	7.17		a flavonol	InChIKey=ZDOTZEDNGNPOEW-UHFFFAOYSA-M	C3(/C(\\C1(\\OC2(\\C(/O)=C(C=C(O)C(/C(C(\\[O-])=1)=O)=2)/O)))=C/C=C(O)C=3)
aucuparin	-14.45	7.6	7.11	3.81	7.28	*	a phytoalexin // "an organic aromatic compound"	InChIKey=KCKBEANTNJGRCV-UHFFFAOYSA-N	COC2(/C(/O)=C(C=C(C1(/C=CC=CC=1))C=2)/OC)
4-prenylphlormethylbutanophenone	-0.05	15.24	0.05	0.2	7.7		a 2-acyl-4-prenylphloroglucinol	InChIKey=KYHKDOKSARWIDI-UHFFFAOYSA-M	CCC(C)C(C1(\\C(\\O)=C/C(\\[O-])=C(CC=C(C)C)/C(/O)=1))=O
(<i>S</i>)-atropine	11.1	3.92	10.68	0.52	7.85		atropine	InChIKey=RKUNBYITZUJHSG-FXUDXRNXSA-O	C[N+]1([C@H]2(C[C@@H](C[C@@H]1CC2)OC(=O)[C@H](CO)C3(C=CC=CC=3)))
9-[6(S),9-diamino-5,6,7,8,9-pentadeoxy-&beta;-D-ribo-nonafuranosyl]-9H-purin-6-amine	4.55	16.09	-8.26	-4.21	8.02		a small molecule	InChIKey=IRPVYKULMDQOJU-HVMNINKTSA-P	C([N+])CCC([N+])C[C@@H]3(O[C@@H](N1(C=NC2(C(N)=NC=NC1=2)))[C@H](O)[C@H](O)3)
2,5,7-trihydroxy-4'-methoxyisoflavanone	-3.3	4.67	-6.74	-9.74	8.15	*	an isoflavone	InChIKey=IIQJLBKXWGKSKE-CZUORRHYSA-M	COC3(/C=CC([C@@H]1([C@H](O)OC2(/C(/C(=O)1)=C(C=C([O-])C=2)/O)))=CC=3)
(6<i>S</i>)-5-formyl-tetrahydrofolate mono-L-glutamate	-13.76	7.49	7.29	8.24	8.27		a (6<i>S</i>)-5-formyltetrahydrofolate	InChIKey=VVIAGPKUTFNRDU-STQMWFEESA-L	C(NC1(/C=CC(\\C(=O)N[C@H](C(=O)[O-])CCC([O-])=O)=C/C=1))[C@@H]2(CNC3(\\N=C(N)NC(=O)C(\\N([CH]=O)2)=3))
1-<i>O</i>-4-hydroxybenzoyl-&beta;-<i>D</i>-glucose	-0.14	8.35	-6.7	-9.87	8.5	*	a benzoate	InChIKey=XWTGDGASXRARSP-HMUNZLOLSA-N	C([C@@H]2(O[C@@H](OC(=O)C1(/C=CC(\\O)=C/C=1))[C@@H]([C@H]([C@@H]2O)O)O))O
2-hydroxy-3-nitropropionate	-0.14	0.02	-0.02	0.23	8.59		a C-nitro compound	InChIKey=XUBFCGLROXDUOV-UHFFFAOYSA-M	C([N+](=O)[O-])C(O)C(=O)[O-]
(R)-methylmalonyl-CoA	-0.01	-0.05	18.48	-0.01	8.77	*	methylmalonyl-CoA	InChIKey=MZFOKIKEPGUZEN-AGCMQPJKSA-I	C[C@@H](C(=O)SCCNC(=O)CCNC(=O)[C@H](O)C(C)(C)COP(=O)(OP(=O)(OC[C@H]1([C@@H](OP([O-])(=O)[O-])[C@@H](O)[C@@H](O1)N2(C3(N=CN=C(C(N=C2)=3)N))))[O-])[O-])C([O-])=O
succinyl-CoA	-0.05	0.03	0.05	0.07	8.86	*	pyruvate dehydrogenase and TCA cycle" // "TCA cycle variation V (plant)"	a coenzyme A-activated compound	InChIKey=VNOYUJKHFWYWIR-ITIYDSSPSA-I	CC(C)([C@@H](O)C(=O)NCCC(=O)NCCSC(=O)CCC(=O)[O-])COP(=O)(OP(=O)(OC[C@H]1([C@@H](OP([O-])(=O)[O-])[C@@H](O)[C@@H](O1)N2(C3(N=CN=C(C(N=C2)=3)N))))[O-])[O-]
sinigrin	9.38	3.05	0.05	0.1	8.92		an alkenyl-glucosinolate	InChIKey=PHZOWSSBXJXFOR-PTGZALFTSA-M	C=CCC(S[C@H]1(O[C@H](CO)[C@@H](O)[C@H](O)[C@@H](O)1))=NOS([O-])(=O)=O
18-hydroxyoleoyl-CoA	-10.68	0.03	10.21	-3.51	10.01		a long-chain &omega;-hydroxy fatty acyl-CoA	InChIKey=MQACSUXWIYYZAK-UTNXWDCOSA-J	CC(C)([C@@H](O)C(=O)NCCC(=O)NCCSC(=O)CCCCCCCC=CCCCCCCCCO)COP(=O)(OP(=O)(OC[C@H]1([C@@H](OP([O-])(=O)[O-])[C@@H](O)[C@@H](O1)N2(C3(N=CN=C(C(N=C2)=3)N))))[O-])[O-]
3-[(6'-methylsulfanyl)hexyl]malate	8.04	9.99	-11.22	-11	10.07	*	a 3-[(&omega;-methylsulfanyl)alkyl]malate	InChIKey=LQQZHLHCFSCJCU-UHFFFAOYSA-L	CSCCCCCCC(C(O)C(=O)[O-])C(=O)[O-]
dehydroascorbate (bicyclic form)	10.86	10.24	-10.06	0.18	10.18	*	a small molecule	InChIKey=QPPOKIPSRPKDEM-VPGXFDHMSA-N	C2(=O)(O[C@@H]1([C@](O)(OC[C@H](O)1)[C@](O)(O)2))
isorhamnetin 3-<i>O</i>-(3\-<i>O</i>-<i>p</i>-coumaroyl)-glucoside"	8.67	12.06	5.87	5.75	11.55		a flavonol derivative	InChIKey=CNKAKUZLQGNVQK-WILGQBCPSA-N	COC1(/C(\\O)=C/C=C(C=1)C4(\\OC5(/C(/C(=O)C(\\O[C@H]3(O[C@@H]([C@@H](O)[C@H](OC(=O)C=CC2(C=CC(\\O)=C/C=2))[C@@H](O)3)CO))=4)=C(C=C(O)C=5)/O)))
dXMP	9.95	17.34	2.75	0.05	11.73		a small molecule	InChIKey=RTWWRSBEQVIVBY-UHFFFAOYSA-L	C(OP(=O)([O-])[O-])C3(OC(N1(C=NC2(\\C(=O)NC(=O)NC/1=2)))CC(O)3)
IMP	2.64	17.36	2.77	0.01	11.75		a purine ribonucleoside 5'-monophosphate // "a nucleic acid component"	InChIKey=GRSZFWQUAKGDAV-KQYNXXCUSA-L	C(OP(=O)([O-])[O-])[C@@H]1(O[C@H]([C@H](O)[C@H](O)1)N2(C=NC3(C(=O)NC=NC2=3)))
digitoxigenin 3-O-&beta;-D-quinovoside	-3.75	12.37	-3.95	10.05	12.03	*	a steroid	InChIKey=WQMLFJWIKARBFW-RKBURUEZSA-N	CC1(OC([C@H](O)C(O)[C@H](O)1)OC5(CC6(CCC4([C@H](CCC3(C)(C(C2(/COC(=O)C=2))CCC(O)34))C(CC5)(C)6))))
(+)-pisatin	4.53	12.34	-10.99	0.87	12.44		a small molecule	InChIKey=LZMRDTLRSDRUSU-SJORKVTESA-N	COC2(/C=C1(OC[C@]3(O)(C4(C(\\O[C@H](C/1=C/C=2)3)=C/C5(/OCOC(\\C=4)=5)))))
11-hydroxyvittatine	19.16	14.03	-3.95	11.91	13.4	*	a small molecule	InChIKey=KWAOMPWGIIXDPH-NWLYGAKOSA-N	C2(OC3(\\C=C1(CN5(C[C@@H](O)[C@]4(C1=CC(/O2)=3)(C=C[C@H](C[C@@H]45)O)))))
11-hydroxyferruginol	7.36	13.65	0.09	13.56	13.71		a diterpenoid	InChIKey=MUVSVZOWXAYLSD-YWZLYKJASA-N	CC(C)C2(C=C1(CC[C@@H]3(C(C)(C)CCC[C@](C)(C1=C(O)C(O)=2)3)))
L-threonine 3-O-phosphate	13.35	20.29	0.05	0.2	13.73		a phosphorylated amino acid	InChIKey=USRGIUJOYOXOQJ-GBXIJSLDSA-L	C[C@@H](OP([O-])([O-])=O)[C@H]([N+])C([O-])=O
(2-hydroxyphenyl)acetate	9.47	10.32	-6.5	-0.18	13.81	*	a small molecule	InChIKey=CCVYRRGZDBSHFU-UHFFFAOYSA-M	C(=O)([O-])CC1(\\C=CC=CC(\\O)=1)
3-glc-glc-rha, 28-glc medicagenic acid	13.69	11.33	-2.56	4.29	13.82		|Unclassified-Compounds|		CC15(C(C(C(C(C1)O)OC2(OC(C(C(C2O)OC3(OC(C(C(C3O)OC4(OC(C(C(C4O)O)O)C))O)CO))O)CO))(C)C(O)=O)CCC6(C5CC=C7(C6(CCC8(CCC(CC78)(C)C)C(=O)OC9(OC(C(O)C(O)C(O)9)CO))C))C)
4-methoxycinnamate	13.05	14.14	13.38	14.23	14.19		a small molecule	InChIKey=AFDXODALSZRGIH-QPJJXVBHSA-M	COC1(/C=CC(C=CC([O-])=O)=CC=1)
&alpha;-D-galacturonate 1-phosphate	7.84	10.5	-4.68	14.55	14.2	*	a small molecule	InChIKey=AIQDYKMWENWVQJ-DTEWXJGMSA-K	C(=O)([O-])[C@@H]1(O[C@@H]([C@@H]([C@H]([C@H]1O)O)O)OP([O-])([O-])=O)
1,2-diaminopropanoate	3.1	14.9	0.09	6.04	14.34		a small molecule	InChIKey=HQMLIDZJXVVKCW-UHFFFAOYSA-O	CC([N+])C(=O)N
<i>meso</i>-diaminopimelate	0.37	6.81	-0.06	-3.43	14.78		L-threonine and L-methionine biosynthesis II"	2,6-diaminopimelate // "an L-amino acid" // "an L-lysine or <i>meso</i>-2	6-diaminoheptanedioate"	InChIKey=GMKMEZVLHJARHF-SYDPRGILSA-N	C([C@H](CCC[C@H](C([O-])=O)[N+])[N+])([O-])=O
gentiodelphin	-0.03	18.58	0.07	6.11	15.58	*	a small molecule	InChIKey=CMHKKALEZOJWDP-JXKRDHHRSA-N	C(O)[C@H]8([C@@H](O)[C@H](O)[C@@H](O)[C@H](OC6(/C(C3(/C=C(O[C@@H]2([C@H](O)[C@@H](O)[C@H](O)[C@@H](COC(=O)C=CC1(C=C(O)C(\\O)=C/C=1))O2))C(/O)=C(C=3)/O))=[O+]C7(/C=C([O-])C=C(O[C@@H]5([C@H](O)[C@@H](O)[C@H](O)[C@@H](COC(=O)C=CC4(C=C(O)C(\\O)=C/C=4))O5))C(/C=6)=7)))O8)
dodecyl icosanoate	3.29	9.51	0.06	16.75	15.62		a long-chain alcohol--long-chain acyl wax ester	InChIKey=GFFYHZLIDINABP-UHFFFAOYSA-N	CCCCCCCCCCCCCCCCCCCC(OCCCCCCCCCCCC)=O
9,10-epoxy-18-hydroxystearate	14.13	7.52	0.05	0.2	15.98		an epoxy fatty acid // "a long-chain 2	3	4-saturated fatty acid" // "an &omega;-hydroxy long-chain fatty acid"	InChIKey=ITTPZDMHCNGAGQ-UHFFFAOYSA-M	C(CCCCCCCC1(C(CCCCCCCC(=O)[O-])O1))O
(3R)-3-hydroxy-16-methoxy-2,3-dihydrotabersonine	-8.46	15.73	-8.36	15.39	16.07		a small molecule	InChIKey=MLIQIRKAHMVCDD-MMGCJVFTSA-O	CC[C@]25(C=CC[N+]4(CC[C@]1(C3(\\C=CC(\\OC)=C/C(/N[C@H]1[C@](C(OC)=O)(O)C2)=3))[C@@H]45))
3-deoxy-D-arabino-heptulosonate 7-phosphate	14.36	16.9	8.52	16.72	16.81		a small molecule	InChIKey=PJWIPEXIFFQAQZ-PUFIMZNGSA-K	C(=O)([O-])C(=O)C[C@@H](O)[C@H](O)[C@H](O)COP([O-])(=O)[O-]
ubiquinol-<i>10</i>	-0.06	0.03	16.23	21.56	17.58		pyruvate dehydrogenase and TCA cycle" // "glycerol degradation I" // "glycerol-3-phosphate shuttle" // "UMP biosynthesis I" // "superpathway of pyrimidine ribonucleotides <i>de novo</i> biosynthesis" // "superpathway of pyrimidine deoxyribonucleotides <i>de novo</i> biosynthesis" // "L-lysine degradation I" // "TCA cycle variation V (plant)" // "NAD/NADH phosphorylation and dephosphorylation" // …	an ubiquinol	InChIKey=QNTNKSLOFHEFPK-UPTCCGCDSA-N	CC(C)=CCCC(/C)=C/CCC(/C)=C/CCC(/C)=C/CCC(/C)=C/CCC(/C)=C/CCC(/C)=C/CCC(/C)=C/CCC(/C)=C/CCC(/C)=C/CC1(/C(/O)=C(C(/OC)=C(C(\\C)=1)/O)/OC)
12-hydroxydihydrochelirubine	16.6	17.83	-1.47	8.76	18	*	a small molecule	InChIKey=LEHAJESKGINQOW-UHFFFAOYSA-N	C1(C6(\\C(C4(/C(\\N(C)1)=C3(C=C2(OCOC/2=C/C\\3=C(C=4)/O))))=C(C=C5(OCOC\\5=6))OC))
methylcinnamate	-3.88	17.58	0.14	-3.75	18.13		an aromatic compound	InChIKey=CCRCUPLGCSFEDV-BQYQJAHWSA-N	COC(C=CC1(C=CC=CC=1))=O
3,7-dimethylquercetagetin	0.23	11.87	7.01	-3.17	18.38		a flavonol derivative	InChIKey=WGWGXVOAFMLMJZ-UHFFFAOYSA-N	COC3(\\C=C2(OC(/C1(/C=C(O)C(\\O)=C/C=1))=C(C(=O)C\\2=C(C(/O)=3)/O)/OC))
(2E,11Z)-icosa-2,11-dienoyl-CoA	-3.6	3.39	-3.54	-3.35	18.43	*	a coenzyme A-activated compound	InChIKey=LAECEUXZOONXDY-NWGWHIGPSA-J	CCCCCCCCC=CCCCCCCCC=CC(=O)SCCNC(=O)CCNC(=O)[C@H](O)C(C)(C)COP(=O)(OP(=O)(OC[C@H]1([C@@H](OP([O-])(=O)[O-])[C@@H](O)[C@@H](O1)N2(C3(N=CN=C(C(N=C2)=3)N))))[O-])[O-]
phloroglucinol	-4	14.36	0.02	1.07	18.96	*	a small molecule	InChIKey=QCDYQQDYXPDABM-UHFFFAOYSA-N	C1(\\C(\\O)=C/C(\\O)=C/C(\\O)=1)
<i>sn</i>-glycerol 3-phosphate	-0.15	11.74	-0.17	16.36	19.47		glycerol 1-phosphate	InChIKey=AWUCVROLDVIAJX-GSVOUGTGSA-L	C(OP([O-])(=O)[O-])[C@H](O)CO
4-methylumbelliferone	13.12	0.06	21.64	14.47	21.13		a pyron-substituted coumarin	InChIKey=HSHNITRMYYLLCV-UHFFFAOYSA-N	CC1(/C2(\\C=CC(\\O)=C/C(/OC(C=1)=O)=2))
traumatin	3.47	18.81	0.05	15.79	22.54		a medium-chain 2,3,4-saturated fatty acid // "a monounsaturated fatty acid" // "an &omega;-oxo fatty acid"	InChIKey=INMKWUNQKOWGEZ-VQHVLOKHSA-M	[CH](C=CCCCCCCCCC(=O)[O-])=O
mono-<i>trans</i>, poly-<i>cis</i>-decaprenyl group	0.19	7.98	5.57	21.59	24.33	*	a polyprenol group		CC=C(C)CCC=C(C)CCC=C(C)CCC=C(C)CCC=C(C)CCC=C(C)CCC=C(C)CCC=C(CCC=C(C)CCC=C(C)C)C
arabidopaldehyde				3.11			a phenylpropanoid	InChIKey=IQBFGXJTTIFUFR-OWOJBTEDSA-M	[CH](=O)C=CC1(C=C(C([O-])=O)OC(=O)C=1)
selenate				7.57			an inorganic anion	InChIKey=QYHFIVBSNOWOCQ-UHFFFAOYSA-L	O=[Se](=O)([O-])[O-]

## Sheet: Volcano Red Rubin
Compound	A. brasilense	Nitrate	Nitrate + A. brasilense	Sulfate	Sulfate + A. brasilense	VIP	Ontology - parents of class	InChI-Key	SMILES
7,8-dihydroberberine	-24.84	-20.94	-24.8	-24.93	-17.31		an alkaloid	InChIKey=FZAGOOYMTPGPGF-UHFFFAOYSA-N	C2(CC5(\\C=C1(OCOC/1=C/C(\\C3(/N2CC4(\\C(\\C=3)=C/C=C(OC)C(/OC)=4)))=5)))
sphinganine 1-phosphate	-3.69	-3.22	-0.03	-21.34	0.88	*	a sphingoid 1-phosphate	InChIKey=YHEDRJPUIRMZMP-ZWKOTPCHSA-M	CCCCCCCCCCCCCCC[C@H]([C@H](COP([O-])(=O)[O-])[N+])O
(13<i>S</i>,14<i>R</i>)-13-<i>O</i>-acetyl-1-hydroxy-<i>N</i>-methylcanadine	-0.13	0.01	-0.23	-19.76	-0.49		an alkaloid	InChIKey=UNFCTLFLKCGAOK-LOMQJKJHSA-O	CC(=O)O[C@H]1([C@@H]3(C4(\\C(\\CC[N+](CC2(\\C(/OC)=C(C=CC\\1=2)/OC))(C)3)=C/C5(/OCOC(\\C(/O)=4)=5))))
taxiphyllin	-7.73	-18.4	-22.9	-17.65	-22.86		a &beta;-D glucoside // "a nitrile"	InChIKey=NVLTYOJHPBMILU-GMDXDWKASA-N	C2(\\C=C(O)C=CC(\\[C@@H](O[C@H]1(O[C@H](CO)[C@@H](O)[C@H](O)[C@@H](O)1))C#N)=2)
(3E)-phytochromobilin	0.15	-0.15	-0.47	-17.17	-7.69		a phytochromobilin	InChIKey=DKMLMZVDTGOEGU-UAWLBFNISA-L	CC=C1([C@@H](C)C(NC\\1=C/C4(/NC(\\C=C2(C(\\CCC([O-])=O)=C(C)/C(=N2)C=C3(C(\\C)=C(C=C)/C(=O)N3)))=C(CCC([O-])=O)/C(\\C)=4))=O)
3-[(6'-methylsulfanyl)hexyl]malate	-0.02	-14.91	-23.08	-16.98	1.83	*	a 3-[(&omega;-methylsulfanyl)alkyl]malate	InChIKey=LQQZHLHCFSCJCU-UHFFFAOYSA-L	CSCCCCCCC(C(O)C(=O)[O-])C(=O)[O-]
luteolin 7-<i>O</i>-&beta;-D-diglucuronide	4.22	-9.96	-3.87	-14.08	-14.08		a small molecule	InChIKey=PBBVWJQPAZYQDB-DBFWEQBMSA-L	C([C@@H]5(O[C@@H](O[C@H]1([C@H]([C@@H]([C@@H](C([O-])=O)O[C@H]1OC4(/C=C3(C(/C(C=C(C2(/C=C(C(\\O)=C/C=2)O))O3)=O)=C(C=4)/O)))O)O))[C@@H]([C@H]([C@@H]5O)O)O))([O-])=O
gossypetin 7-<i>O</i>-glucoside	3.48	-0.78	3.32	-13.89	3.18		a flavonol	InChIKey=ATRBFJXIWFCIMW-ZGNDCXKCSA-M	C4(\\C=C(C(\\O)=C/C(\\C1(\\OC2(\\C(/C(C(\\[O-])=1)=O)=C(C=C(C(/O)=2)O[C@@H]3([C@@H]([C@H]([C@H](O)[C@H](O3)CO)O)O))/O)))=4)O)
3-<i>O</i>-digalloyl-1,2,4,6-tetra-<i>O</i>-&beta;-<i>D</i>-galloylglucose	3.4	-14.15	-13.82	-13.82	-13.98	*	a gallotannin	InChIKey=ZYDLAYCPLOHXHH-YHNAUUMRSA-N	C(OC(C1(/C=C(O)C(/O)=C(C=1)/O))=O)[C@@H]6(O[C@H]([C@H](OC(C2(/C=C(O)C(/O)=C(C=2)/O))=O)[C@@H](OC(=O)C4(/C=C(OC(C3(/C=C(O)C(/O)=C(C=3)/O))=O)C(/O)=C(C=4)/O))[C@H](OC(=O)C5(/C=C(O)C(/O)=C(C=5)/O))6)OC(C7(/C=C(O)C(/O)=C(C=7)/O))=O)
(2<i>E</i>,6<i>E</i>,10<i>E</i>,14<i>E</i>,18<i>E</i>)-lycopapentaene	-2.46	-13.4	-13.38	-13.38	-13.38		a hydrocarbon // "a tetraterpenoid"	InChIKey=UKCLJWRKPGPSLL-NGXRMTJOSA-N	CC(C)=CCCC(/C)=C/CCC(/C)=C/CCC(/C)=C/CCC=C(C)CCC[C@H](C)CCC[C@H](C)CCCC(C)C
codeinone	8.09	-13	-13	-13	-13		a small molecule	InChIKey=XYYVYLMBEZUESM-CMKMFDCUSA-O	C[N+]4(CC[C@]15([C@H]3(C(=O)C=C[C@@H]([C@@H](CC2(/C=CC(/OC)=C(C\\1=2)/O3))4)5)))
(S)-corytuberine	-0.3	-5.74	-4.97	-12.3	-0.56		an alkaloid	InChIKey=WHFUDAOCYRYAKQ-LBPRGKRZSA-O	C[N+]3(CCC2(\\C=C(OC)C(O)=C1(C4(C(\\C[C@@H](C/1=2)3)=C/C=C(OC)C(O)=4))))
5,6-epoxy-3-hydroxy-9-apo-&beta;-caroten-9-one	0.55	-11.14	1.26	-12.17	-0.49	*	a 9-apo-carotenone	InChIKey=VYKLRWGPNUVKNC-AATRIKPKSA-N	CC(C=CC12(C(CC(CC1(O2)C)O)(C)C))=O
rutin	0.68	1.42	-8.34	-12.11	-5.63		a flavonol 3-O-[&alpha;-L-rhamnosyl-(1->6)-&beta;-D-glucoside]	InChIKey=IKGXIBQEEMLURG-NVPNHPEKSA-N	C[C@@H]1([C@H](O)[C@@H](O)[C@@H](O)[C@@H](O1)OC[C@H]2([C@@H](O)[C@H](O)[C@@H](O)[C@@H](O2)OC4(/C(=O)C5(\\C(\\O)=C/C(\\O)=C/C(/OC(/C3(/C=C(O)C(\\O)=C/C=3))=4)=5))))
2-<i>S</i>-cysteinyldopaquinone	0.05	-3.96	0.36	-10.54	-0.02		a quinone	InChIKey=WZVBMYNCJXSJII-BQBZGAKWSA-N	C(SC1(/C(C(C=CC(/C[C@@H](C(=O)[O-])[N+])=1)=O)=O))[C@@H](C(=O)[O-])[N+]
codeine	2.47	-9.35	-9.08	-9.08	-9.18		a small molecule	InChIKey=OROGSEYTTFOCAN-DNJOTXNNSA-O	C[N+]4(CC[C@]15([C@H]3([C@@H](O)C=C[C@@H]([C@@H](CC2(/C=CC(/OC)=C(C\\1=2)/O3))4)5)))
2-pyrrolidone	-8.83	-8.55	-8.54	-8.7	-8.61		a small molecule	InChIKey=HNJBEVLQSNELDL-UHFFFAOYSA-N	C1(NC(CC1)=O)
3-(pyrazol-1-yl)-L-alanine	-1.44	6.1	-3.62	-7.94	-1.2		a modified amino acid	InChIKey=PIGOPELHGLPKLL-YFKPBYRVSA-N	C1(/N(N=CC=1)C[C@H]([N+])C(=O)[O-])
3-oxooctanoyl-CoA	10.85	-7.86	-7.83	-7.82	-7.82		a medium-chain oxoacyl-CoA	InChIKey=WPIVBCGRGVNDDT-CECATXLMSA-J	CCCCCC(=O)CC(=O)SCCNC(=O)CCNC(=O)[C@H](O)C(C)(C)COP(=O)(OP(=O)(OC[C@H]1([C@@H](OP([O-])(=O)[O-])[C@@H](O)[C@@H](O1)N2(C3(N=CN=C(C(N=C2)=3)N))))[O-])[O-]
&alpha;-L-rhamnopyranose	0.64	-2.97	-13.05	-7.81	-13.18		L-rhamnopyranose	InChIKey=SHZGCJCMOBCMKK-HGVZOGFYSA-N	C[C@@H]1([C@@H]([C@H]([C@H]([C@@H](O1)O)O)O)O)
<i>N</i>-propargylglycine	4.27	-6.86	-17.31	-7.47	-17.53	*	a modified amino acid	InChIKey=DGYHPLMPMRKMPD-BYPYZUCNSA-N	C#CC[C@@H](C(=O)[O-])[N+]
(3<i>R</i>)-3-hydroxycerotoyl-CoA	5.31	-1.15	0.22	-7.46	-7.65		a very-long-chain (3<i>R</i>)-3-hydroxyacyl-CoA	even numbered fatty acid &beta;-oxidation" // "sphingolipid biosynthesis (plants)" // "CDP-diacylglycerol biosynthesis I" // "phosphatidylglycerol biosynthesis II (non-plastidic)" // "superpathway of phospholipid biosynthesis II (plants)" // "phosphatidylcholine acyl editing" // "triacylglycerol biosynthesis (Chlamydomonas)" // "diacylglycerol and triacylglycerol biosynthesis" // "very long chain…	InChIKey=GBMJOTOUUWGTIA-CSLACTSSSA-J	CCCCCCCCCCCCCCCCCCCCCCC[C@@H](O)CC(=O)SCCNC(=O)CCNC(=O)[C@H](O)C(C)(C)COP(=O)(OP(=O)(OC[C@@H]1(O[C@H]([C@@H]([C@@H]1OP([O-])(=O)[O-])O)N2(C3(N=CN=C(N)C(N=C2)=3))))[O-])[O-]
adenylyl-imidodiphosphate	-7.61	-7.39	-7.39	-7.39	-7.39		a small molecule	InChIKey=PVKSNHVPLWYQGJ-KQYNXXCUSA-J	C([C@H]3([C@H]([C@@H](O)[C@H](N1(C2(N=CN=C(C(N=C1)=2)N)))O3)O))OP(OP(NP(=O)([O-])[O-])([O-])=O)([O-])=O
2'-methoxythiamine pyrophosphate	-7.53	-7.31	-7.31	-7.31	-7.31		a small molecule	InChIKey=PWBCVHDHRGCQHM-UHFFFAOYSA-L	CC1(/[N+](=CSC(\\CCOP(=O)([O-])OP(=O)([O-])[O-])=1)CC2(/C(N)=NC(OC)=NC=2))
phenylarsenious oxide	4.68	-7.3	-3.62	-7.31	-7.31		a small molecule	InChIKey=BQVCCPGCDUSGOE-UHFFFAOYSA-N	C1(/C=CC(\\[As]=O)=C/C=1)
quercetin-3,3'-bissulfate	-7.51	1.5	-3.75	-7.29	-7.29		a small molecule	InChIKey=CVENNDDRCHLONB-UHFFFAOYSA-K	C3(/C(\\C1(\\OC2(/C(/C(C(\\OS(=O)(=O)[O-])=1)=O)=C(C=C([O-])C=2)/O)))=C/C(/OS(=O)([O-])=O)=C(C=3)/O)
5-phospho-&alpha;-D-ribose 1-diphosphate	-4.73	-2.63	-3.61	-7.28	-7.28		a sugar phosphate	InChIKey=PQGCEDQWHSBAJP-TXICZTDVSA-I	C(OP(=O)([O-])[O-])[C@@H]1(O[C@H](OP([O-])(=O)OP([O-])(=O)[O-])[C@H](O)[C@H](O)1)
2,4,6-trihydroxycinnamoyl-CoA	10.72	-2.83	0.05	-7.23	-7.23		a coenzyme A-activated compound	InChIKey=SYWCHDHDSJLGJL-VWNJLPARSA-J	CC(C)([C@@H](O)C(=O)NCCC(=O)NCCSC(=O)C=CC1(C=C(O)C(\\O)=C/C(O)=1))COP(=O)(OP(=O)(OC[C@H]2([C@@H](OP([O-])(=O)[O-])[C@@H](O)[C@@H](O2)N3(C4(N=CN=C(C(N=C3)=4)N))))[O-])[O-]
(14<i>E</i>,18<i>E</i>)-lycopadiene	-7.41	-7.19	-7.19	-7.19	-7.19		a hydrocarbon // "a tetraterpenoid"	InChIKey=JBDZFQFIKGPIRH-PQPPKSKMSA-N	CC(C)CCC[C@@H](C)CCC[C@@H](C)CCCC(/C)=C/CCC=C(C)CCC[C@H](C)CCC[C@H](C)CCCC(C)C
D-erythrose 4-phosphate	-7.33	-1.43	-3.59	-7.11	-7.16		a sugar phosphate	InChIKey=NGHMDNPXVRFFGS-IUYQGCFVSA-L	[CH]([C@@H]([C@@H](COP([O-])([O-])=O)O)O)=O
BPH--698	1.58	-7.08	-7.07	-7.1	-7.1		a small molecule	InChIKey=FZZSEWIFTHAVJY-UHFFFAOYSA-K	CCCC2(/C=CC(\\C1(/C=CC(\\CCCC(S(=O)(=O)O[K])P(O[K])(O[K])=O)=C/C=1))=C/C=2)
tetranitromethane	-1.45	-2.32	-7.04	-7.07	-7.07		a C-nitro compound	InChIKey=NYTOUQBROMCLBJ-UHFFFAOYSA-N	C([N+]([O-])=O)([N+]([O-])=O)([N+](=O)[O-])[N+]([O-])=O
4,5-dihydroxyisophthalate	-7.25	-1.07	-3.49	-7.03	-7.03		a small molecule	InChIKey=FBOCZYIJDQZQFE-UHFFFAOYSA-L	C(=O)([O-])C1(/C=C(C(=O)[O-])C(/O)=C(C=1)/O)
dUTP	-7.22	-6.95	-6.93	-7	-7		a pyrimidine 2'-deoxyribonucleoside 5'-triphosphate // "a pyrimidine"	InChIKey=AHCYMLUZIRLXAA-SHYZEUOFSA-J	C([C@H]2([C@H](C[C@H](N1(C(NC(C=C1)=O)=O))O2)O))OP(OP(OP(=O)([O-])[O-])([O-])=O)([O-])=O
cisplatin	-7.18	-2.51	-3.4	-6.96	-6.96		a small molecule		Cl[Pt++](.N)(.N)Cl
dolichol-group	12.09	-7.15	-7.04	-6.94	1.41	*	a polyprenol group		CC[C@@H](C)CCC=C(C)CCC=C(C)CCC=C(C)CCC=C(C)CCC=C(C)CCC=C(C)CCC=C(C)CCC=C(C)CCC=C(C)CCC=C(C)CCC=C(C)CCC=C(C)CCC=C(C)CCC=C(C)CCC=C(C)C
2,4-dichlorophenoxyacetate	-4.27	-0.9	-3.54	-6.91	-6.98		a small molecule	InChIKey=OVSKIKFHRZPJSS-UHFFFAOYSA-M	C(COC1(\\C=CC(\\Cl)=C/C(/Cl)=1))(=O)[O-]
cyclic ADP-ribose	-4.22	-2.45	-3.37	-6.76	-6.76		an ADP-ribose	InChIKey=RSEFDAKYCYLNIE-KEOHHSTQSA-M	C4(OP([O-])(=O)OP(OC[C@H]1([C@@H](O)[C@@H](O)[C@@H](O1)N2(C=NC3(/C2=NC=[N+](C(/N)=3)[C@H]5(O[C@H]4[C@@H](O)[C@@H](O)5)))))([O-])=O)
(6R)-6-fluoro-5-enolpyruvoylshikimate 3-phosphate	1.71	2.23	-3.14	-6.63	-6.63		a small molecule	InChIKey=IUMNLRGFWIEEHG-JQCXWYLXSA-K	C=C([O-])C(=O)O[C@H]1([C@@H](C(\\C(=O)[O-])=C/[C@@H]([C@H]1O)OP(C)(=O)[O-])F)
5-amino-1-(5-phospho-D-ribosyl)imidazole-4-carboxylate	1.72	6.69	0.18	-6.62	-6.62		a small molecule	InChIKey=XFVULMDJZXYMSG-ZIYNGMLESA-K	C(OP([O-])([O-])=O)[C@H]2([C@@H](O)[C@@H](O)[C@H](N1(C=NC(\\C([O-])=O)=C(N)/1))O2)
(6S)-6-fluoro-5-enolpyruvoylshikimate 3-phosphate	1.71	11.09	-3.14	-6.62	-6.62		a small molecule	InChIKey=IUMNLRGFWIEEHG-RBXMUDONSA-K	C=C([O-])C(=O)O[C@H]1([C@H](C(\\C(=O)[O-])=C/[C@@H]([C@H]1O)OP(C)(=O)[O-])F)
(<i>S</i>)-atropine	4.63	-2.8	-6.36	-6.2	-9.96		atropine	InChIKey=RKUNBYITZUJHSG-FXUDXRNXSA-O	C[N+]1([C@H]2(C[C@@H](C[C@@H]1CC2)OC(=O)[C@H](CO)C3(C=CC=CC=3)))
<i>cis</i>-tuberonic acid	-3.47	-6.95	-22.14	-5.52	-15.01		tuberonic acid	InChIKey=RZGFUGXQKMEMOO-SZXTZRQCSA-M	C(O)CC=CC[C@H]1(C(=O)CC[C@@H]1CC([O-])=O)
narirutin	-10.39	12.45	13.39	-5.03	4.43	*	a small molecule	InChIKey=HXTFHSYLYXVTHC-AJHDJQPGSA-N	C[C@H]1(O[C@H]([C@H](O)[C@H](O)[C@@H](O)1)OC[C@H]2([C@@H](O)[C@H](O)[C@@H](O)[C@@H](O2)OC4(/C=C(O)C5(/C(=O)C[C@@H](C3(/C=CC(\\O)=C/C=3))OC(\\C=4)=5))))
methyl gibberellin A<sub>9</sub>	2.93	1.55	-4.68	-4.72	-4.72		a gibberellin	InChIKey=GKRMJALKMNRHGF-WARWBDHMSA-N	C=C3([C@H]2(CC[C@@H]4([C@@]15(CCC[C@@]([C@H]1[C@@H]([C@](C2)(C3)4)C(OC)=O)(C)C(O5)=O))))
(22&alpha;)-hydroxy-campest-4-en-3-one	-0.98	-0.44	-4.14	-4.18	-4.26		a brassinosteroid	InChIKey=FMFAICDKESPFNH-NQMBQAPESA-N	CC(C)[C@H](C)C[C@H](O)[C@@H](C)[C@@H]3(CC[C@@H]4([C@H]2(CCC1(/[C@@](CCC(=O)C=1)(C)[C@H]2CC[C@](C)34))))
(5Z)-icosenoyl-CoA	9.92	2.48	-3.83	-3.83	-3.96		a small molecule	InChIKey=BSDNSNWHAZZYHM-KMYHARBQSA-J	CCCCCCCCCCCCCCC=CCCCC(=O)SCCNC(=O)CCNC(=O)[C@H](O)C(C)(C)COP(=O)(OP(=O)(OC[C@H]1([C@@H](OP([O-])(=O)[O-])[C@@H](O)[C@@H](O1)N2(C3(N=CN=C(C(N=C2)=3)N))))[O-])[O-]
2-methylbutanoyl-CoA	8.61	10.89	-3.8	-3.83	-3.83		a coenzyme A-activated compound	InChIKey=LYNVNYDEQMMNMZ-XGXNYEOVSA-J	CCC(C)C(=O)SCCNC(=O)CCNC(=O)[C@H](O)C(C)(C)COP(=O)(OP(=O)(OC[C@H]1([C@@H](OP([O-])(=O)[O-])[C@@H](O)[C@@H](O1)N2(C3(N=CN=C(C(N=C2)=3)N))))[O-])[O-]
4-methyl-5-(2-phosphooxyethyl)thiazole	-0.88	0.88	-3.74	-3.79	-3.79		a thiazole	InChIKey=OCYMERZCMYJQQO-UHFFFAOYSA-L	CC1(/N=CSC(\\CCOP([O-])(=O)[O-])=1)
fluorofumarate	-3.93	-3.94	-3.71	-3.77	-3.77		a small molecule	InChIKey=OISKHJXTRQPMQT-UPHRSURJSA-N	C(=O)(O)C=C(F)C(=O)O
thenoyl trifluoro acetone	-0.99	0.9	-3.71	-3.76	-3.76		a small molecule	InChIKey=UGHMGUXSEYFBLC-DAXSKMNVSA-M	C1(/C=C(SC=1)C(=O)C=C([O-])C(F)(F)F)
2-hydroxylamino-4,6-dinitrotoluene-O-glucoside	2.54	-0.31	-3.69	-3.72	6.85		a C-nitro compound // "an aromatic compound"	InChIKey=FDHKZWGRIMCNIS-HENWMNBSSA-N	CC2(\\C(\\NOC1(O[C@H](CO)[C@@H](O)[C@H](O)[C@@H](O)1))=C/C(\\[N+](=O)[O-])=C/C(\\[N+]([O-])=O)=2)
4-nitrophenyl phosphate	-3.88	5.77	0.08	-3.72	-3.66		a C-nitro compound	InChIKey=XZKIHKMTEMTJQX-UHFFFAOYSA-L	C1(/C(\\[N+]([O-])=O)=C/C=C(C=1)OP([O-])(=O)[O-])
BPH-700	-3.91	5.4	-0.07	-3.69	-3.69		a small molecule	InChIKey=LBNUOQAEVSXSSE-UHFFFAOYSA-K	C(S(O[K])(=O)=O)(P(=O)(O[K])O[K])CCCC2(/C=CC(\\C1(/C=CC=CC=1))=C/C=2)
N-bromosuccinimide	-3.84	-3.57	-3.55	-3.62	-3.62		an organobromine compound	InChIKey=PCLIMKBDDGJMGD-UHFFFAOYSA-N	C1(C(N(C(C1)=O)Br)=O)
4-amino-2-trifluoromethyl 5-hydroxymethylpyrimidine pyrophosphate	-3.83	1.19	-0.15	-3.61	-3.61		a small molecule	InChIKey=UKNJCTHTCAKKNG-UHFFFAOYSA-K	C(OP(=O)([O-])OP(=O)([O-])[O-])C1(/C(N)=NC(C(F)(F)F)=NC=1)
3-amino-1-hydroxyacetone 1-phosphate	2.08	2.3	0.03	-3.6	-0.74		a small molecule	InChIKey=HIQNVODXENYOFK-UHFFFAOYSA-M	C(C(=O)C[N+])OP(=O)([O-])[O-]
UDP	-3.78	1.05	0.01	-3.56	-3.56		a pyrimidine ribonucleoside 5'-diphosphate // "a pyrimidine"	3-&beta;-D-glucan biosynthesis" // "salidroside biosynthesis" // "xyloglucan biosynthesis" // "UDP-glucose biosynthesis (from sucrose)" // "sucrose degradation II (sucrose synthase)" // "superpathway of anaerobic sucrose degradation" // "flavonol acylglucoside biosynthesis III - quercetin derivatives" // "rutin biosynthesis" // "xylan biosynthesis" // "salicylate glucosides biosynthesis II" // "s…	4-dihydroxymandelonitrile &beta;-<i>D</i>-glucose biosynthesis" // "luteolin glycosides biosynthesis" // "apigenin glycosides biosynthesis" // "kaempferol gentiobioside biosynthesis" // "esculetin modification" // "curcumin glucoside biosynthesis" // "naringenin glycoside biosynthesis" // "2	4	6-trinitrotoluene degradation" // "sphingolipid biosynthesis (plants)" // "sulfoquinovosyl diacylglycerol biosynthesis" // "gossypetin metabolism" // "benzoyl-&beta;-<i>D</i>-glucopyranose biosynthesis" // "des-methyl avenacin A-1 biosynthesis" // "<i>N</i>-methylanthraniloyl-&beta;-<i>D</i>-glucopyranose biosynthesis" // "podophyllotoxin glucosides metabolism" // "(+)-secoisolariciresinol digluc…	InChIKey=XCCTYIAWTASOJW-XVFCMESISA-K	C(OP(=O)([O-])OP(=O)([O-])[O-])[C@@H]1(O[C@H]([C@H](O)[C@H](O)1)N2(C=CC(=O)NC(=O)2))
2,3-dimercaptopropan-1-ol	-3.73	-3.46	-3.44	-3.51	-3.51		a small molecule	InChIKey=WQABCVAJNWAXTE-UHFFFAOYSA-N	C(O)C(S)CS
uridine-5'-diphosphate chloroacetol	-3.72	-0.63	-3.43	-3.5	-3.56		a pyrimidine	InChIKey=RTOKQNPULGAVTE-QCNRFFRDSA-L	C(Cl)C(=O)COP(=O)([O-])OP(=O)([O-])OC[C@@H]1(O[C@H]([C@H](O)[C@H](O)1)N2(C=CC(=O)NC(=O)2))
ADP	-3.63	1.16	-3.35	-3.47	-3.41		a purine ribonucleoside 5'-diphosphate // "a nucleic acid component"	8-divinyl-chlorophyllide <i>a</i> biosynthesis I (aerobic	light-dependent)" // "L-leucine degradation I" // "glutathione biosynthesis" // "TCA cycle II (plants and fungi)" // "TCA cycle variation V (plant)" // "1	4-dihydroxy-2-naphthoate biosynthesis II (plants)" // "C4 photosynthetic carbon assimilation cycle	PEPCK type" // "superpathway of glyoxylate cycle and fatty acid degradation" // "&gamma;-glutamyl cycle" // "&gamma;-glutamyl cycle (plant pathway)" // "4-amino-2-methyl-5-diphosphomethylpyrimidine biosynthesis" // "superpathway of thiamine diphosphate biosynthesis III (eukaryotes)" // "ppGpp biosynthesis" // "pyrimidine deoxyribonucleotides <i>de novo</i> biosynthesis II" // "pyrimidine deoxyrib…	4	5)P<sub>3</sub>)" // "flavin biosynthesis I (bacteria and plants)" // "pyridoxal 5'-phosphate salvage I" // "pyridoxal 5'-phosphate salvage II (plants)" // "Calvin-Benson-Bassham cycle" // "Rubisco shunt" // "phosphopantothenate biosynthesis I" // "superpathway of coenzyme A biosynthesis II (plants)" // "phosphopantothenate biosynthesis II" // "hydroxymethylpyrimidine salvage" // "NAD/NADH phosph…	L-threonine and L-methionine biosynthesis II" // "superpathway of L-isoleucine biosynthesis I" // "guanine and guanosine salvage III" // "purine nucleosides salvage II (plant)" // "glycerol degradation I" // "photorespiration" // "D-galactose degradation I (Leloir pathway)" // "stachyose degradation" // "D-galactose detoxification" // "UDP-galactose biosynthesis (salvage pathway from galactose us…	pyruvate dehydrogenase and TCA cycle" // "<i>S</i>-methyl-5'-thioadenosine degradation I" // "L-methionine salvage cycle I (bacteria and plants)" // "L-methionine salvage cycle II (plants)" // "methylerythritol phosphate pathway I" // "taxadiene biosynthesis (engineered)" // "superpathway of ergosterol biosynthesis II" // "superpathway of geranylgeranyl diphosphate biosynthesis II (via MEP)" // "…	3	4)P3)" // "lipid-dependent phytate biosynthesis II (via Ins(1	3	4)P<sub>3</sub>)" // "superpathway of lipid-dependent phytate biosynthesis" // "1D-<i>myo</i>-inositol hexakisphosphate biosynthesis III (<i>Spirodela polyrrhiza</i>)" // "homoglutathione biosynthesis" // "UDP-&beta;-L-arabinose biosynthesis II (from &beta;-L-arabinose)" // "UDP-&alpha;-D-glucuronate biosynthesis (from <i>myo</i>-inositol)" // "UDP-&alpha;-D-galacturonate biosynthesis II (from D-…	as a signaling molecule (Chlamydomonas)" // "phosphatidate metabolism	as a signaling molecule" // "urea degradation I" // "starch biosynthesis" // "ammonia assimilation cycle II" // "L-glutamine biosynthesis III" // "nitrate reduction II (assimilatory)" // "L-glutamine biosynthesis I" // "ammonia assimilation cycle I" // "superpathway of ammonia assimilation (plants)" // "Organic Nitrogen Assimilation" // "Inorganic Nitrogen Assimilation" // "glutamate-glutamine sh…	4	5)P3)" // "superpathway of 1D-<i>myo</i>-inositol hexakisphosphate biosynthesis (plants)" // "D-<i>myo</i>-inositol (1	3	4)-trisphosphate biosynthesis" // "formate assimilation into 5	10-methylenetetrahydrofolate" // "folate polyglutamylation" // "tetrahydrofolate biosynthesis II" // "folate transformations II" // "UDP-<i>N</i>-acetyl-D-glucosamine biosynthesis II" // "sucrose biosynthesis II" // "trehalose degradation II (cytosolic)" // "GDP-glucose biosynthesis" // "sucrose degradation III (sucrose invertase)" // "superpathway of sucrose and starch metabolism I (non-photosyn…	6-bisphosphate biosynthesis" // "mannitol degradation II" // "guanosine deoxyribonucleotides <i>de novo</i> biosynthesis I" // "superpathway of guanosine nucleotides <i>de novo</i> biosynthesis I" // "adenosine deoxyribonucleotides <i>de novo</i> biosynthesis" // "superpathway of adenosine nucleotides <i>de novo</i> biosynthesis I" // "superpathway of purine nucleotides <i>de novo</i> biosynthesi…	4	5)-trisphosphate biosynthesis" // "biotin-carboxyl carrier protein assembly" // "crotonyl-CoA/ethylmalonyl-CoA/hydroxybutyryl-CoA cycle (engineered)" // "glutathione-mediated detoxification II" // "ornithine-citrulline shuttle" // "glutaminyl-tRNA<sup>gln</sup> biosynthesis via transamidation" // "L-asparagine biosynthesis III (tRNA-dependent)" // "ophthalmate biosynthesis" // "phytol salvage pat…	InChIKey=XTWYTFMLZFPYCI-KQYNXXCUSA-K	C([C@H]3([C@H]([C@H]([C@H](N1(C2(N=CN=C(C(N=C1)=2)N)))O3)O)O))OP(OP(=O)([O-])[O-])([O-])=O
ATP&gamma;S	-3.68	-3.41	-3.39	-3.46	-3.46		a small molecule	InChIKey=NLTUCYMLOPLUHL-KQYNXXCUSA-J	C([C@H]3([C@H]([C@H]([C@H](N1(C2(N=CN=C(C(N=C1)=2)N)))O3)O)O))OP(OP(=O)([O-])OP(=S)([O-])[O-])([O-])=O
6-phospho D-glucono-1,5-lactone	-3.67	0.81	-3.38	-3.45	-3.45		a small molecule	InChIKey=IJOJIVNDFQSGAB-SQOUGZDYSA-L	C(OP([O-])(=O)[O-])[C@H]1([C@@H](O)[C@H](O)[C@@H](O)C(=O)O1)
ITP	-3.66	-3.39	-3.37	-3.44	-3.44		a purine ribonucleoside 5'-triphosphate // "a nucleic acid component"	InChIKey=HAEJPQIATWHALX-KQYNXXCUSA-J	C(OP(=O)([O-])OP([O-])(=O)OP([O-])([O-])=O)[C@@H]1(O[C@H]([C@H](O)[C@H](O)1)N2(C=NC3(C(=O)NC=NC2=3)))
uroporphyrin I	10.84	-3.48	10.43	-3.44	-3.44	*	a porphyrin	InChIKey=ZRUDAKXKJCGVKT-JRHDEHKPSA-F	C(C5(/C3(/N=C(C=C4(N=C(C=C1(C(\\CCC([O-])=O)=C(CC([O-])=O)/C(=N1)C=C2(C(\\CCC(=O)[O-])=C(CC([O-])=O)/C(=N2)C=3)))C(\\CC(=O)[O-])=C(CCC(=O)[O-])/4))C(\\CC([O-])=O)=5)))CC(=O)[O-]
GDP	-3.64	0.98	-3.35	-3.42	-3.42		a purine ribonucleoside 5'-diphosphate // "a nucleic acid component"	InChIKey=QGWNDRXFNXRZMB-UUOKFMHZSA-K	C(OP(=O)([O-])OP(=O)([O-])[O-])[C@@H]1(O[C@H]([C@H](O)[C@H](O)1)N2(C=NC3(C(=O)NC(N)=NC2=3)))
3'-phosphoadenylyl-sulfate	-3.6	-3.38	-3.38	-3.38	-3.38		a small molecule	InChIKey=GACDQMDRPRGCTN-KQYNXXCUSA-J	C([C@H]3([C@H]([C@H]([C@H](N1(C2(N=CN=C(C(N=C1)=2)N)))O3)O)OP(=O)([O-])[O-]))OP(OS([O-])(=O)=O)([O-])=O
dTTP	-3.58	-3.36	-3.36	-3.36	-3.36		a pyrimidine 2'-deoxyribonucleoside 5'-triphosphate // "a pyrimidine"	InChIKey=NHVNXKFIZYSCEB-XLPZGREQSA-J	CC1(/C(=O)NC(=O)N(C=1)[C@@H]2(C[C@H](O)[C@@H](COP(=O)([O-])OP(=O)([O-])OP(=O)([O-])[O-])O2))
(2<i>E</i>,6<i>E</i>)-farnesyl diphosphate	-0.53	-1.19	-2.39	-3.17	-1.69		a methyl-branched lipid // "a sesquiterpenoid" // "an all-<i>trans</i>-polyisoprenyl diphosphate"	trans</i>-farnesyl diphosphate biosynthesis" // "ubiquinol-10 biosynthesis (eukaryotic)" // "rubber biosynthesis" // "polyisoprenoid biosynthesis" // "epoxysqualene biosynthesis" // "plant sterol biosynthesis II" // "superpathway of ergosterol biosynthesis II" // "cholesterol biosynthesis I" // "botryococcenes and methylated squalene biosynthesis" // "zealexin biosynthesis" // "costunolide biosyn…	8-dimethylnona-1	3	7-triene biosynthesis I" // "farnesene biosynthesis" // "germacrene biosynthesis" // "&beta;-caryophyllene biosynthesis" // "bisabolene biosynthesis (engineered)" // "oleoresin sesquiterpene volatiles biosynthesis" // "superpathway of oleoresin turpentine biosynthesis" // "sesquiterpenoid phytoalexins biosynthesis"	InChIKey=VWFJDQUYCIWHTN-YFVJMOTDSA-K	CC(C)=CCCC(/C)=C/CCC(/C)=C/COP(OP([O-])(=O)[O-])(=O)[O-]
salutaridinol	2.61	-3.14	0.52	-3.05	-9.17		a small molecule	InChIKey=LLSADFZHWMEBHH-TYILLQQXSA-O	C[N+]3(CC[C@]14(C=C(OC)[C@@H](O)C=C([C@@H](CC2(/C1=C(O)C(\\OC)=C/C=2))3)4))
(R)-reticuline	2.61	2.46	0.52	-3.05	-9.14		a small molecule	InChIKey=BHLYRWXGMIUIHG-OAHLLOKOSA-O	C1([N+]([C@@H](C2(/C=C(C(\\OC)=C/C(/C1)=2)O))CC3(/C=CC(/OC)=C(C=3)/O))C)
4-methylumbelliferone	4.38	8.6	-13.06	-2.78	7.75		a pyron-substituted coumarin	InChIKey=HSHNITRMYYLLCV-UHFFFAOYSA-N	CC1(/C2(\\C=CC(\\O)=C/C(/OC(C=1)=O)=2))
echinenone	-6.13	0.69	-0.28	-2.05	0.12		a ketocarotenoid	InChIKey=QXNWZXMBUKUYMD-QQGJMDNJSA-N	CC(\\C=CC=C(C)C=CC1(/C(CCCC(\\C)=1)(C)C))=C/C=CC=C(C=CC=C(C=CC2(/C(CCC(C(\\C)=2)=O)(C)C))C)C
(11Z,14Z,17Z)-icosatrienoyl-CoA	1.54	15.19	-7.05	-1.92	-7.2	*	a coenzyme A-activated compound	InChIKey=BVBYYRVLCDMZNJ-UBQHHBPXSA-J	CCC=CCC=CCC=CCCCCCCCCCC(=O)SCCNC(=O)CCNC(=O)[C@H](O)C(C)(C)COP(=O)(OP(=O)(OC[C@@H]1(O[C@H]([C@@H]([C@@H]1OP([O-])(=O)[O-])O)N2(C3(N=CN=C(N)C(N=C2)=3))))[O-])[O-]
dodecyl icosanoate	-8.28	-8.29	-8.02	-1.78	6.95		a long-chain alcohol--long-chain acyl wax ester	InChIKey=GFFYHZLIDINABP-UHFFFAOYSA-N	CCCCCCCCCCCCCCCCCCCC(OCCCCCCCCCCCC)=O
1-18:1-2-16:0-monogalactosyldiacylglycerol	-7.79	1.2	0.62	-1.58	-1.12		monogalactosyldiacylglycerol-34:1	lower eukaryotes)" // "icosapentaenoate biosynthesis I (lower eukaryotes)" // "docosahexaenoate biosynthesis I (lower eukaryotes)" // "linoleate biosynthesis I (plants)" // "dimorphecolate biosynthesis" // "hydroxylated fatty acid biosynthesis (plants)" // "glycerolipid acyl chain desaturation (Chlamydomonas)" // "glycolipid desaturation"	InChIKey=JBZBYHKCRFIXBI-OTVPKONDSA-N	CCCCCCCCC=CCCCCCCCC(OC[C@H](CO[C@H]1(O[C@@H]([C@@H]([C@@H]([C@H]1O)O)O)CO))OC(CCCCCCCCCCCCCCC)=O)=O
3-epoxy-16-methoxy-2,3-dihydrotabersonine	0.73	-6.28	0.24	-1.51	-0.3		a small molecule	InChIKey=BOHJHCDMBHKGFD-OGQGWYMCSA-O	CC[C@]16(C=CC[N+]5(CC[C@]3(C4(\\C=CC(\\OC)=C/C(/NC2(OC(C(=O)OC)(C1)2)3)=4))[C@@H]56))
(R)-4-hydroxymandelonitrile	-6.53	-6.37	-17.06	-1.4	-2.29		an aromatic (<i>R</i>)-hydroxynitrile	InChIKey=HOOOPXDSCKBLFG-QMMMGPOBSA-N	C1(\\C=C(O)C=CC(\\[C@@H](O)C#N)=1)
3-oxo-lesqueroloyl-CoA	-3.96	-0.82	0.03	-1.19	-2.36	*	a coenzyme A-activated compound	InChIKey=NQXRRZBOZBKGIU-MHAUFEDZSA-J	CCCCCC[C@@H](O)CC=CCCCCCCCC(=O)CC(SCCNC(=O)CCNC(=O)[C@H](O)C(C)(C)COP(=O)(OP(=O)(OC[C@H]1([C@@H](OP([O-])(=O)[O-])[C@@H](O)[C@@H](O1)N2(C3(N=CN=C(C(N=C2)=3)N))))[O-])[O-])=O
4-(2'-carboxyphenyl)-4-oxobutyryl-CoA	0.61	-4.86	0.52	-1.17	-1.17		a small molecule	4-dihydroxy-2-naphthoate biosynthesis II (plants)"	InChIKey=KVAQAPQXOXTRAE-HSJNEKGZSA-I	CC(C)([C@@H](O)C(=O)NCCC(=O)NCCSC(CCC(C1(\\C=CC=CC(/C([O-])=O)=1))=O)=O)COP(=O)(OP(=O)(OC[C@@H]2(O[C@H]([C@@H]([C@@H]2OP([O-])(=O)[O-])O)N3(C4(N=CN=C(N)C(N=C3)=4))))[O-])[O-]
phenylethyl acetate	-0.18	-4.69	-0.22	-1.07	-25.56		a carboxylic ester	InChIKey=MDHYEMXUFSJLGV-UHFFFAOYSA-N	CC(OCCC1(/C=CC=CC=1))=O
bisdemalonylsalvianin	-0.36	-16.18	-23.66	-1.03	-0.66	*	an anthocyanidin 3,5-di-<i>O</i>-&beta;-D-glucoside	InChIKey=MLLMLJXCGLXOIJ-AQAMAIGXSA-N	C(O)[C@H]6([C@H]([C@@H]([C@H]([C@H](OC3(/C4(/C=C(O[C@@H]2([C@H](O)[C@@H](O)[C@H](O)[C@@H](COC(=O)C=CC1(C=C(O)C(\\O)=C/C=1))O2))C(=[O+]C(/C=C(C=3)[O-])=4)C5(/C=CC(\\O)=C/C=5))))O6)O)O)O)
1-18:3-2-16:0-digalactosyldiacylglycerol	-7.41	-0.51	-1.73	-0.9	-1.17	*	digalactosyldiacylglycerol-34:3	lower eukaryotes)" // "icosapentaenoate biosynthesis I (lower eukaryotes)" // "docosahexaenoate biosynthesis I (lower eukaryotes)" // "linoleate biosynthesis I (plants)" // "dimorphecolate biosynthesis" // "hydroxylated fatty acid biosynthesis (plants)"	InChIKey=IJEZFJFCQWYKEM-HZDSJJKASA-N	CCC=CCC=CCC=CCCCCCCCC(OC[C@H](CO[C@H]2(O[C@H](CO[C@H]1(O[C@H](CO)[C@H](O)[C@H](O)[C@@H](O)1))[C@H](O)[C@H](O)[C@@H](O)2))OC(=O)CCCCCCCCCCCCCCC)=O
1-16:0-2-18:3-digalactosyldiacylglycerol	-10.92	-0.51	-1.73	-0.9	-28.7	*	digalactosyldiacylglycerol-34:3	lower eukaryotes)" // "icosapentaenoate biosynthesis I (lower eukaryotes)" // "docosahexaenoate biosynthesis I (lower eukaryotes)" // "linoleate biosynthesis I (plants)" // "dimorphecolate biosynthesis" // "hydroxylated fatty acid biosynthesis (plants)"	InChIKey=WVWINZZVFAFVMJ-HZDSJJKASA-N	CCC=CCC=CCC=CCCCCCCCC(O[C@@H](CO[C@H]2(O[C@H](CO[C@H]1(O[C@H](CO)[C@H](O)[C@H](O)[C@@H](O)1))[C@H](O)[C@H](O)[C@@H](O)2))COC(=O)CCCCCCCCCCCCCCC)=O
(1R,3R)-chrysanthemoyl CoA	0.96	-2.43	-7.41	-0.8	-12.23		a coenzyme A-activated compound	InChIKey=IOIRXYHMXCHGNR-JRAGNYAJSA-J	CC(C)=C[C@H]4([C@@H](C(SCCNC(=O)CCNC(=O)[C@H](O)C(C)(C)COP(=O)(OP(=O)(OC[C@H]1([C@@H](OP([O-])(=O)[O-])[C@@H](O)[C@@H](O1)N2(C3(N=CN=C(C(N=C2)=3)N))))[O-])[O-])=O)[C@@]4(C)C)
cyclo-dopa 5-<i>O</i>-glucoside	-2.85	0.32	8.44	-0.77	-2.73		an alkaloid	InChIKey=PXMFPPFHRQZIHO-OLCQZNMOSA-M	C([C@H]3([C@H]([C@@H]([C@H]([C@H](OC1(/C(\\O)=C/C2(\\N[C@@H](CC(\\C=1)=2)C([O-])=O)))O3)O)O)O))O
isorhamnetin 3-<i>O</i>-(3\-<i>O</i>-<i>p</i>-coumaroyl)-glucoside"	0.07	-4.15	-0.56	-0.58	-3.54		a flavonol derivative	InChIKey=CNKAKUZLQGNVQK-WILGQBCPSA-N	COC1(/C(\\O)=C/C=C(C=1)C4(\\OC5(/C(/C(=O)C(\\O[C@H]3(O[C@@H]([C@@H](O)[C@H](OC(=O)C=CC2(C=CC(\\O)=C/C=2))[C@@H](O)3)CO))=4)=C(C=C(O)C=5)/O)))
tri-acyl estolide	21.86	17.2	-0.37	-0.5	-0.5		a carboxylic ester // "a 1	phospholipases // "choline biosynthesis III" // "superpathway of choline biosynthesis" // "phospholipases (Chlamydomonas)" // "phosphatidate metabolism	as a signaling molecule (Chlamydomonas)" // "phosphatidate metabolism	as a signaling molecule" // "CDP-diacylglycerol biosynthesis II" // "phosphatidylglycerol biosynthesis I (plastidic)" // "CDP-diacylglycerol biosynthesis I" // "phosphatidylglycerol biosynthesis II (non-plastidic)" // "superpathway of phospholipid biosynthesis II (plants)" // "diacylglycerol and triacylglycerol biosynthesis" // "arachidonate biosynthesis I (6-desaturase	lower eukaryotes)" // "icosapentaenoate biosynthesis I (lower eukaryotes)" // "docosahexaenoate biosynthesis I (lower eukaryotes)" // "linoleate biosynthesis I (plants)" // "dimorphecolate biosynthesis" // "hydroxylated fatty acid biosynthesis (plants)" // "triacylglycerol biosynthesis (Chlamydomonas)" // "stigma estolide biosynthesis"	InChIKey=ZQPBAVRTRJHDII-USITZPDMSA-N	C(O)CCCCCCCC=CCCCCCCCC(OCCCCCCCCC=CCCCCCCCC(OC[C@@H](OC(=O)CCCCCCCC=CCC=CCCCCCO)CO)=O)=O
<i>P</i><sup>1</sup>,<i>P</i><sup>5</sup>-<i>bis</i>(5'-adenosyl) pentaphosphate	19.66	2.78	3.37	-0.34	-0.5	*	a diadenosine polyphosphate	InChIKey=OIMACDRJUANHTJ-XPWFQUROSA-I	C([C@H]3([C@H]([C@H]([C@H](N1(C2(N=CN=C(C(N=C1)=2)N)))O3)O)O))OP(=O)([O-])OP(=O)([O-])OP(=O)([O-])OP(=O)([O-])OP(OC[C@H]6([C@H]([C@H]([C@H](N4(C5(N=CN=C(C(N=C4)=5)N)))O6)O)O))(=O)[O-]
3,5,7-trioxododecanoyl-CoA	12.07	2.69	3.33	-0.24	-0.34		a coenzyme A-activated compound	InChIKey=VHFNTMSJVWRHBO-GMHMEAMDSA-J	CCCCCC(=O)CC(=O)CC(=O)CC(=O)SCCNC(=O)CCNC(=O)[C@H](O)C(C)(C)COP(=O)(OP(=O)(OC[C@H]1([C@@H](OP([O-])(=O)[O-])[C@@H](O)[C@@H](O1)N2(C3(N=CN=C(C(N=C2)=3)N))))[O-])[O-]
dihydrozeatin-<i>O</i>-glucoside	0.13	-8.9	0.55	-0.18	-25.73	*	an adenine-type cytokinin glucoside	InChIKey=QRZHDHJUYBONQQ-JSYMRTRDSA-N	C[C@@H](CCNC1(C2(\\N=CNC(\\N=CN=1)=2)))CO[C@H]3([C@@H]([C@H]([C@@H]([C@H](O3)CO)O)O)O)
(2<i>R</i>)-ethylmalonyl-CoA	-0.54	14.84	11.32	-0.13	9.37		a coenzyme A-activated compound	InChIKey=VUGZQVCBBBEZQE-XGVFZYDCSA-I	CC[C@@H](C(SCCNC(=O)CCNC(=O)[C@H](O)C(C)(C)COP(=O)(OP(=O)(OC[C@H]1([C@@H](OP([O-])(=O)[O-])[C@@H](O)[C@@H](O1)N2(C3(N=CN=C(C(N=C2)=3)N))))[O-])[O-])=O)C([O-])=O
adenosine tetraphosphate	17.75	-0.13	6.92	-0.12	-0.12		a purine ribonucleoside 5'-tetraphosphate	InChIKey=WWMWAMFHUSTZTA-KQYNXXCUSA-J	C([C@H]3([C@H]([C@H]([C@H](N1(C2(N=CN=C(C(N=C1)=2)N)))O3)O)O))OP(OP(OP(OP(O)([O-])=O)([O-])=O)([O-])=O)([O-])=O
malonyl-CoA	19	-0.11	0.01	-0.12	-0.12	*	a coenzyme A-activated compound	lower eukaryotes)" // "very long chain fatty acid biosynthesis II" // "phenolic malonylglucosides biosynthesis" // "glutathione-mediated detoxification II" // "olivetol biosynthesis" // "aloesone biosynthesis II" // "barbaloin biosynthesis" // "hyperxanthone E biosynthesis" // "tetrahydroxyxanthone biosynthesis (from benzoate)" // "sorgoleone biosynthesis" // "phloridzin biosynthesis" // "4-hydro…	InChIKey=LTYOQGRJFJAKNA-DVVLENMVSA-I	CC(C)([C@@H](O)C(=O)NCCC(=O)NCCSC(=O)CC(=O)[O-])COP(=O)(OP(=O)(OC[C@H]1([C@@H](OP([O-])(=O)[O-])[C@@H](O)[C@@H](O1)N2(C3(N=CN=C(C(N=C2)=3)N))))[O-])[O-]
4-hydroxycrotonyl-CoA	18.07	-0.11	3.46	-0.12	-0.12	*	a coenzyme A-activated compound	InChIKey=FQFRDDVZPBFYST-GLTODZKNSA-J	CC(C)([C@@H](O)C(=O)NCCC(=O)NCCSC(C=CCO)=O)COP(=O)(OP(=O)(OC[C@@H]1(O[C@H]([C@@H]([C@@H]1OP([O-])(=O)[O-])O)N2(C3(N=CN=C(N)C(N=C2)=3))))[O-])[O-]
&gamma;-methylphosphinothricin	-0.29	5.1		-0.12	-0.07		an amino acid	InChIKey=LLSWVOXJHFIPIU-UHFFFAOYSA-M	CC(P([O-])(C)=O)CC([N+])C(=O)[O-]
(<i>E</i>)-1-(L-cysteinylglycin-<i>S</i>-yl)-<i>N</i>-hydroxy-&omega;-(methylsulfanyl)hexan-1-imine	3.33	-0.01	4.09	-0.12	-0.05		an (<i>E</i>)-1-(L-cysteinylglycin-<i>S</i>-yl)-<i>N</i>-hydroxy-&omega;-(methylsulfanyl)alkan-1-imine	InChIKey=NNTFOZKQHHVOHU-JLBUCRLOSA-N	CSCCCCCC(SC[C@H]([N+])C(=O)NCC([O-])=O)=NO
benzoyl-CoA	12.07	-0.03	-0.03	-0.12	-0.03		a coenzyme A-activated compound	&beta;-oxidative)" // "salicortin biosynthesis" // "volatile benzenoid biosynthesis I (ester formation)" // "cocaine biosynthesis" // "taxol biosynthesis"	InChIKey=VEVJTUNLALKRNO-TYHXJLICSA-J	CC(C)([C@@H](O)C(=O)NCCC(=O)NCCSC(=O)C1(/C=CC=CC=1))COP(=O)(OP(=O)(OC[C@H]2([C@@H](OP([O-])(=O)[O-])[C@@H](O)[C@@H](O2)N3(C4(N=CN=C(C(N=C3)=4)N))))[O-])[O-]
3-phenylpropanoyl-CoA	20.47	-0.02	-0.02	-0.12	-0.02	*	a coenzyme A-activated compound // "a phenylpropanoid"	InChIKey=HYSDRCZPYSOWME-FUEUKBNZSA-J	CC(C)([C@@H](O)C(=O)NCCC(=O)NCCSC(=O)CCC1(/C=CC=CC=1))COP(=O)(OP(=O)(OC[C@H]2([C@@H](OP([O-])(=O)[O-])[C@@H](O)[C@@H](O2)N3(C4(N=CN=C(C(N=C3)=4)N))))[O-])[O-]
dipicolinate	18.92	-0.24		-0.07	-0.07		a pyrimidine	InChIKey=WJJMNDUMQPNECX-UHFFFAOYSA-L	C1(/C=C(N=C(C=1)C(=O)[O-])C(=O)[O-])
hydroxymethyl-dCDP	-0.29	2.95		-0.07	-0.12		a pyrimidine	InChIKey=RQKDPSTWKKMBPM-XLPZGREQSA-K	C(O)C2(/C(=NC(N([C@@H]1(C[C@@H]([C@H](O1)COP(OP(=O)([O-])[O-])([O-])=O)O))C=2)=O)N)
dCDP	-0.29	3.05		-0.07	-0.12		a pyrimidine 2'-deoxyribonucleoside 5'-diphosphate // "a pyrimidine"	InChIKey=FTDHDKPUHBLBTL-SHYZEUOFSA-K	C([C@H]2([C@H](C[C@H](N1(C(N=C(C=C1)N)=O))O2)O))OP(OP(=O)([O-])[O-])([O-])=O
ADP group	-0.29	4.31		-0.07	-0.07		a nucleoside phosphate group		C([C@H]3([C@H]([C@H]([C@H](N1(C2(N=CN=C(C(N=C1)=2)N)))O3)O)O))OP(OP([O-])(=O)O)(=O)[O-]
sinigrin	-0.29	2.91	3.55	-0.07	2.68		an alkenyl-glucosinolate	InChIKey=PHZOWSSBXJXFOR-PTGZALFTSA-M	C=CCC(S[C@H]1(O[C@H](CO)[C@@H](O)[C@H](O)[C@@H](O)1))=NOS([O-])(=O)=O
succinate		6.16	3.59	-0.05	-0.09		a C4-dicarboxylate	non C-13 hydroxylation)" // "anthocyanin biosynthesis (delphinidin 3-O-glucoside)" // "gibberellin inactivation I (2&beta;-hydroxylation)" // "hyoscyamine and scopolamine biosynthesis" // "superpathway of hyoscyamine and scopolamine biosynthesis" // "hydroxylated mugineic acid phytosiderophore biosynthesis" // "gibberellin biosynthesis III (early C-13 hydroxylation)" // "morphine biosynthesis" //…	vindorosine and vinblastine biosynthesis" // "L-lysine degradation I" // "homocysteine and cysteine interconversion" // "superpathway of glyoxylate cycle and fatty acid degradation" // "aerobic respiration III (alternative oxidase pathway)" // "aerobic respiration I (cytochrome c)" // "reductive TCA cycle I" // "TCA cycle II (plants and fungi)" // "superpathway of cytosolic glycolysis (plants)	pyruvate dehydrogenase and TCA cycle" // "TCA cycle variation V (plant)"	InChIKey=KDYFGRWQOYBRFD-UHFFFAOYSA-L	C(C([O-])=O)CC([O-])=O
5-iodo-dCTP		2.84	3.37	-0.05	-0.06		an iodoaromatic compound	InChIKey=OOMLBPVHGFQCCL-RRKCRQDMSA-J	C([C@H]2([C@H](C[C@H](N1(C(N=C(C(\\I)=C/1)N)=O))O2)O))OP(OP(OP([O-])([O-])=O)([O-])=O)([O-])=O
L-glutamate-5-semialdehyde	-3.48	-3.55	0.06	-0.05	-12.21	*	a non-proteinogenic &alpha;-amino acid	InChIKey=KABXUUFDPUOJMW-BYPYZUCNSA-N	C(C[C@H]([N+])C([O-])=O)[CH]=O
urushiol quinone	3.86	-0.01	4.68	-0.05	-0.05		an aromatic compound		C=CCCC=CC=CCCCCCCCC1(/C(/O)=C(C=C(C=1)C(C=CC=CC=CC)CCCCCCCC2(\\C=CC=C(O)C(\\O)=2))/O)
4-nitroso-2,6-dinitrotoluene	0.04	6.38	0.01	-0.04	2.81		a C-nitro compound // "an aromatic compound"	InChIKey=CNEZUBNNRCSZMT-UHFFFAOYSA-N	CC1(\\C(\\[N+](=O)[O-])=C/C(\\N=O)=C/C(\\[N+]([O-])=O)=1)
3-methyl-2-oxobutanoate	3.67	9.6		-0.04	-0.14	*	a 2-oxo carboxylate	side chain elongation cycle" // "Organic Nitrogen Assimilation" // "dimethylsulfoniopropanoate biosynthesis I (Wollastonia)" // "L-asparagine degradation II" // "L-homomethionine biosynthesis" // "dimethylsulfoniopropanoate biosynthesis III (algae)" // "<i>S</i>-methyl-5-thio-&alpha;-D-ribose 1-phosphate degradation I" // "phosphopantothenate biosynthesis I" // "superpathway of coenzyme A biosynt…	InChIKey=QHKABHOOEWYVLI-UHFFFAOYSA-M	CC(C(C([O-])=O)=O)C
UDP-&beta;-L-rhamnose	8.74	-0.04	-0.04	-0.04	-0.04		a UDP-sugar	InChIKey=DRDCJEIZVLVWNC-SLBWPEPYSA-L	C[C@H]3(O[C@H](OP(OP(=O)([O-])OC[C@@H]1(O[C@H]([C@H](O)[C@H](O)1)N2(C=CC(=O)NC(=O)2)))([O-])=O)[C@H](O)[C@H](O)[C@@H](O)3)
(<i>E</i>)-2-methylcrotonoyl-CoA	8.85	-0.04	-0.04	-0.04	-0.04		a coenzyme A-activated compound	InChIKey=PMWATMXOQQZNBX-DKBZLLMOSA-J	CC=C(C)C(=O)SCCNC(=O)CCNC(=O)[C@H](O)C(C)(C)COP(=O)(OP(=O)(OC[C@H]1([C@@H](OP([O-])(=O)[O-])[C@@H](O)[C@@H](O1)N2(C3(N=CN=C(C(N=C2)=3)N))))[O-])[O-]
1-(5-phospho-&beta;-D-ribosyl)-ATP	5.72	-0.29	-0.03	-0.03	5.64		a modified nucleoside	InChIKey=RKNHJBVBFHDXGR-KEOHHSTQSA-I	C([C@H]4([C@H]([C@H]([C@H](N2(C(C3(N=CN([C@@H]1([C@@H]([C@@H]([C@H](O1)COP(OP(=O)([O-])OP(=O)([O-])O)(=O)[O-])O)O))C(N=C2)=3))=N))O4)O)O))OP([O-])([O-])=O
2-thiouridine 5'-triphosphate	-15.43	-0.19	0.44	-0.03	0.01		a small molecule	InChIKey=KHYOUGAATNYCAZ-XVFCMESISA-J	C(OP(OP(OP([O-])([O-])=O)([O-])=O)([O-])=O)[C@@H]1(O[C@H]([C@H](O)[C@H](O)1)N2(C=CC(=O)NC(=S)2))
kaempferol-3-<i>O</i>-&beta;-gentiobioside-7-<i>O</i>-&alpha;-L-rhamnoside	10.25	19.5	-0.02	-0.02	-0.12		a flavonol-3-O-[D-glucopyranosyl(1->6)D-glucopyranoside]-7-O-L-rhamnopyranoside	InChIKey=QFSDWLPMRWDFID-CSNYLUTCSA-N	C[C@H]6(O[C@@H](OC5(/C=C4(C(/C(=O)C(\\O[C@H]1(O[C@@H]([C@H]([C@@H]([C@H]1O)O)O)CO[C@@H]2([C@@H]([C@H]([C@@H]([C@H](O2)CO)O)O)O)))=C(C3(/C=CC(\\O)=C/C=3))/O4)=C(C=5)/O)))[C@@H]([C@@H]([C@H]6O)O)O)
1-hydroxy-2-naphthoyl-CoA	16.04	-0.02	-0.02	-0.02	-0.02	*	a small molecule	InChIKey=ZHSLHXZSNOSMQG-HSJNEKGZSA-J	CC(C)([C@@H](O)C(=O)NCCC(=O)NCCSC(C1(\\C=CC2(/C(\\C(/O)=1)=C/C=CC=2)))=O)COP(=O)(OP(=O)(OC[C@H]3([C@@H](OP([O-])(=O)[O-])[C@@H](O)[C@@H](O3)N4(C5(N=CN=C(C(N=C4)=5)N))))[O-])[O-]
sequoyitol	10.74	10.1	-0.02	-0.02	3.59		a methylated inositol	InChIKey=DSCFFEYYQKSRSV-GWJPIIGYSA-N	CO[C@H]1([C@@H](O)[C@H](O)[C@H](O)[C@H](O)[C@@H](O)1)
methylcinnamate	6.76	4.05		-0.02	16.84		an aromatic compound	InChIKey=CCRCUPLGCSFEDV-BQYQJAHWSA-N	COC(C=CC1(C=CC=CC=1))=O
(+)-6a-hydroxymaackiain	-0.02	-2.24	-0.02	-0.02	-5.54		a pterocarpan	InChIKey=GLMPLZUBQDAZEN-CVEARBPZSA-N	C2([C@@]1(C4(C(\\O[C@@H]1C3(/C(\\O2)=C/C(\\O)=C/C=3))=C/C5(/OCOC(\\C=4)=5)))(O))
4-hydroxy-3-methoxyphenyl-&beta;-hydroxypropanoyl-CoA	18.79	-0.02	-0.02	-0.02	-0.02	*	a coenzyme A-activated compound	InChIKey=SDNPOBCYTJKZSD-XWQDBIPASA-J	CC(C)([C@@H](O)C(=O)NCCC(=O)NCCSC(=O)CC(O)C1(/C=C(OC)C(\\O)=C/C=1))COP(=O)(OP(=O)(OC[C@H]2([C@@H](OP([O-])(=O)[O-])[C@@H](O)[C@@H](O2)N3(C4(N=CN=C(C(N=C3)=4)N))))[O-])[O-]
6'-hydroxyferuloyl-CoA	18.86	-0.02	-0.02	-0.02	-0.02	*	a coenzyme A-activated compound		CC(C)(COP(=O)(O)OP(=O)(O)OC[C@@H]1(O[C@H]([C@H](O)[C@H](OP(=O)(O)O)1)n3(cnc2(c(N)ncnc23))))C(O)C(=O)NCCC(=O)NCCSC(=O)C=Cc4(c(O)cc(O)c(c4)OC)
salvianin	18.88	-0.02	-0.02	-0.02	-0.02	*	a small molecule	InChIKey=PJBHNEIXNNZROX-QBMVVDGVSA-L	C(OC(=O)C=CC1(C=C(O)C(\\O)=C/C=1))[C@H]2([C@@H](O)[C@H](O)[C@@H](O)[C@@H](O2)OC4(/C(=[O+]C5(/C=C(C=C(O[C@@H]3([C@@H]([C@H]([C@@H]([C@H](O3)COC(=O)CC(=O)[O-])OC(CC([O-])=O)=O)O)O))C(/C=4)=5)[O-]))C6(/C=CC(\\O)=C/C=6)))
isobutanoyl-CoA	19.2	-0.02	-0.02	-0.02	-0.02	*	a coenzyme A-activated compound	InChIKey=AEWHYWSPVRZHCT-NDZSKPAWSA-J	CC(C(SCCNC(=O)CCNC(=O)[C@H](O)C(C)(C)COP(=O)(OP(=O)(OC[C@H]1([C@@H](OP([O-])(=O)[O-])[C@@H](O)[C@@H](O1)N2(C3(N=CN=C(C(N=C2)=3)N))))[O-])[O-])=O)C
feruloylacetyl-CoA	19.25	-0.02	-0.02	-0.02	-0.02	*	a coenzyme A-activated compound	InChIKey=KBVPPTKWCRMUEW-KEJNSVKLSA-J	CC(C)([C@@H](O)C(=O)NCCC(=O)NCCSC(=O)CC(=O)C=CC1(C=CC(/O)=C(C=1)/OC))COP(=O)(OP(=O)(OC[C@H]2([C@@H](OP([O-])(=O)[O-])[C@@H](O)[C@@H](O2)N3(C4(N=CN=C(C(N=C3)=4)N))))[O-])[O-]
(<i>R</i>)-3-(phenyl)lactoyl-CoA	19.51	-0.02	-0.02	-0.02	-0.02	*	a coenzyme A-activated compound	InChIKey=FKMUDVUPQINOSF-NHZRKUKBSA-J	CC(C)([C@@H](O)C(=O)NCCC(=O)NCCSC(=O)[C@H](O)CC1(/C=CC=CC=1))COP(=O)(OP(=O)(OC[C@H]2([C@@H](OP([O-])(=O)[O-])[C@@H](O)[C@@H](O2)N3(C4(N=CN=C(C(N=C3)=4)N))))[O-])[O-]
siroheme	18.67	-0.01	-0.02	-0.02	-0.02		a heme	InChIKey=DLKSSIHHLYNIKN-QIISWYHFSA-D	C[C@]4(CC(=O)[O-])([C@H](CCC(=O)[O-])C7(/[N+]5([Fe--]26([N+]1(C(\\C(\\CCC([O-])=O)=C(CC(=O)[O-])/C=1C=C3([C@@](C)(CC(=O)[O-])[C@H](CCC(=O)[O-])C(/N23)=C/C4=5))=C/C8(/N6C(\\C=7)=C(CC([O-])=O)/C(\\CCC(=O)[O-])=8))))))
3S-(4-hydroxyphenyl)-3-hydroxy-propanoyl-CoA	18.27	-0.01	3.51	-0.02	-0.02	*	a small molecule	InChIKey=VDDFXUMTXCQMFM-UGDQNKSBSA-J	CC(C)([C@@H](O)C(=O)NCCC(=O)NCCSC(=O)C[C@H](O)C1(/C=CC(\\O)=C/C=1))COP(=O)(OP(=O)(OC[C@H]2([C@@H](OP([O-])(=O)[O-])[C@@H](O)[C@@H](O2)N3(C4(N=CN=C(C(N=C3)=4)N))))[O-])[O-]
1,2,3,4,6-pentagalloylglucose	15.4	-0.01	7.21	-0.02	-0.02		a hydrolyzable tannin	InChIKey=QJYNZEYHSMRWBK-NIKIMHBISA-N	C(OC(C1(/C=C(O)C(/O)=C(C=1)/O))=O)[C@@H]5(O[C@H]([C@H](OC(C2(/C=C(O)C(/O)=C(C=2)/O))=O)[C@@H](OC(=O)C3(/C=C(O)C(/O)=C(C=3)/O))[C@H](OC(=O)C4(/C=C(O)C(/O)=C(C=4)/O))5)OC(C6(/C=C(O)C(/O)=C(C=6)/O))=O)
(6&alpha;<i>S</i>,11&alpha;<i>S</i>)-4-dimethylallyl-3,6&alpha;,9-trihydroxypterocarpan	28.44	12.25	0.03		-0.09		a small molecule	InChIKey=NLHMQOCIFRDSNU-VQTJNVASSA-N	CC(C)=CCC3(\\C4(/OC[C@]1(O)([C@@H](OC2(/C1=CC=C(O)C=2))C(\\C=CC(\\O)=3)=4)))
3-methylphosphoenolpyruvate		5.86	0.07		-0.06		a small molecule	InChIKey=FGYIHYXZLMDROB-IHWYPQMZSA-K	CC=C(C([O-])=O)OP([O-])([O-])=O
CDP		5.99	0.07		-0.06		a pyrimidine ribonucleoside 5'-diphosphate // "a pyrimidine"	InChIKey=ZWIADYZPOWUWEW-XVFCMESISA-K	C([C@H]2([C@H]([C@H]([C@H](N1(C(N=C(C=C1)N)=O))O2)O)O))OP(OP([O-])([O-])=O)([O-])=O
<i>trans</i>-aconitate		6.03	0.07		-0.06		a tricarboxylate	InChIKey=GTZCVFVGUGFEME-HNQUOIGGSA-K	C([O-])(=O)C=C(C([O-])=O)CC([O-])=O
CDP group		8.9	0.05		2.78		a nucleoside phosphate group		C([C@H]2([C@H]([C@H]([C@H](N1(C(N=C(C=C1)N)=O))O2)O)O))OP(OP([O-])(=O)O)([O-])=O
7-hydroxylaurate		7.3	0.05		7.35		an in-chain hydroxy fatty acid // "a medium-chain 2	4-saturated fatty acid" // "a saturated fatty acid"	acyl-CoA hydrolysis // "ceramide degradation" // "acyl-[acyl-carrier protein] thioesterase pathway" // "phospholipases" // "phosphatidylcholine acyl editing" // "triacylglycerol degradation" // "methyl ketone biosynthesis (engineered)" // "alkane oxidation" // "fatty acid &alpha;-oxidation I" // "fatty acid &beta;-oxidation II (peroxisome)" // "superpathway of glyoxylate cycle and fatty acid degr…	InChIKey=BNWKMHUFFKDAMV-UHFFFAOYSA-M	CCCCCC(O)CCCCCC([O-])=O
pimeloyl-CoA	18.5	-0.11	10.56	0.03	3.43	*	a small molecule	InChIKey=LYCRXMTYUZDUGA-UYRKPTJQSA-I	CC(C)([C@@H](O)C(=O)NCCC(=O)NCCSC(CCCCCC([O-])=O)=O)COP(=O)(OP(=O)(OC[C@H]1([C@@H](OP([O-])(=O)[O-])[C@@H](O)[C@@H](O1)N2(C3(N=CN=C(C(N=C2)=3)N))))[O-])[O-]
guanosine 2',3'-cyclic monophosphate		5.7	0.03	0.04	13.35	*	a nucleoside cyclic phosphate // "a nucleoside cyclic monophosphate" // "a ribonucleoside 2'		InChIKey=UASRYODFRYWBRC-UUOKFMHZSA-M	C(O)[C@@H]2(O[C@H]([C@H]1(OP([O-])(=O)O[C@@H]12))N3(C=NC4(C(=O)NC(N)=NC3=4)))
cyclic pyranopterin phosphate		8.79	3.66	0.04	13.35		a pterin	InChIKey=PWFXLXMPGSLEOZ-QQVWSJFJSA-M	C1(OP([O-])(=O)OC2(C1O[C@H]3([C@H](C(=O)2)NC4(/C(=O)NC(N)=NC(/N3)=4))))
succinyl-CoA	15.85	2.76		0.04	9.23		a coenzyme A-activated compound	pyruvate dehydrogenase and TCA cycle" // "TCA cycle variation V (plant)"	InChIKey=VNOYUJKHFWYWIR-ITIYDSSPSA-I	CC(C)([C@@H](O)C(=O)NCCC(=O)NCCSC(=O)CCC(=O)[O-])COP(=O)(OP(=O)(OC[C@H]1([C@@H](OP([O-])(=O)[O-])[C@@H](O)[C@@H](O1)N2(C3(N=CN=C(C(N=C2)=3)N))))[O-])[O-]
2,5,7-trihydroxy-4'-methoxyisoflavanone		-2.28	-4.03	0.09	-2.06	*	an isoflavone	InChIKey=IIQJLBKXWGKSKE-CZUORRHYSA-M	COC3(/C=CC([C@@H]1([C@H](O)OC2(/C(/C(=O)1)=C(C=C([O-])C=2)/O)))=CC=3)
7,8-dihydropteroate	6.7	13.5	16.28	0.22	13.55		a pteroate	InChIKey=WBFYVDCHGVNRBH-UHFFFAOYSA-M	C(NC1(/C=CC(\\C(=O)[O-])=C/C=1))C2(CNC3(\\N=C(N)NC(=O)C(\\N=2)=3))
guanosine tetraphosphate	-21.15	1.19	1.68	0.26	-6.82	*	a modified nucleotide	InChIKey=KDFXXNGTULMGMF-UUOKFMHZSA-I	C(OP(=O)([O-])OP(=O)(OP([O-])(OP([O-])(=O)[O-])=O)[O-])[C@@H]1(O[C@H]([C@H](O)[C@H](O)1)N2(C=NC3(C(=O)NC(N)=NC2=3)))
sulfuretin 6-glucoside	0.07	-6.23	-0.41	0.29	-3.52		an aurone	InChIKey=MEHCTOVFPFJFEW-LTEMJKMTSA-N	C(O)[C@H]4([C@@H](O)[C@H](O)[C@@H](O)[C@H](OC1(/C=CC2(/C(C(/OC(\\C=1)=2)=C/C3(C=C(O)C(\\O)=C/C=3))=O)))O4)
(+)-carvone	0.03	-5	0.54	0.37	0.02	*	a carvone	InChIKey=ULDHMXUKGWMISQ-VIFPVBQESA-N	C=C([C@H]1(CC(C(\\C)=C/C1)=O))C
3-carboxy-7-(methylsulfanyl)-2-oxoheptanoate	-0.21	-7.01	-0.84	0.47	-1.23		a 3-carboxy-&omega;-(methylsulfanyl)-2-oxoalkanoate	InChIKey=XXJZWLKRFPCKLB-UHFFFAOYSA-L	CSCCCCC(C(=O)C(=O)[O-])C(=O)[O-]
linalyl 6-<i>O</i>-&alpha;-<i>L</i>-arabinopyranosyl- &beta;-<i>D</i>-glucopyranoside	-3.8	-0.01	0.32	0.49	0.64		a monoterpenol // "a carbohydrate derivative"	InChIKey=OKNPZRJNRSGKME-AVIYVUCBSA-N	C=CC(O[C@@H]1([C@@H]([C@H]([C@H](O)[C@H](O1)CO[C@@H]2([C@@H]([C@@H](O)[C@H](CO2)O)O))O)O))(C)CCC=C(C)C
allicin	-0.13	-6.39	-0.09	0.54	-1.57		a dialkyl-thiosulfinate	InChIKey=JDLKFOPOAOFWQN-UHFFFAOYSA-N	C=CCSS(CC=C)=O
5-amino-6-(5-phospho-D-ribitylamino)uracil		1.22	1.74	0.57	0.49		a modified nucleobase	InChIKey=RQRINYISXYAZKL-RPDRRWSUSA-L	C(NC1(NC(NC(=O)C(N)=1)=O))[C@H](O)[C@H](O)[C@H](O)COP([O-])(=O)[O-]
ethylphosphate	-19.2	0.01	0.31	0.63	-19.04	*	a phosphate monoester	InChIKey=ZJXZSIYSNXKHEA-UHFFFAOYSA-L	CCOP([O-])(=O)[O-]
(+)-neomenthol		0.55	0.09	0.7	0.35	*	a monoterpenol	InChIKey=NOOLISFMXDJSKH-UTLUCORTSA-N	CC([C@H]1(CC[C@H](C[C@@H]1O)C))C
(2<i>E</i>6<i>E</i>,10<i>E</i>,14<i>E</i>,18<i>E</i>,22<i>E</i>)-lycopahexaene	-1.45	-4.46	-4.21	0.79	-0.89		a hydrocarbon // "a tetraterpenoid"	InChIKey=KMHKIEPZTSCFEX-UBAVNZOLSA-N	CC(C)=CCCC(/C)=C/CCC(/C)=C/CCC(/C)=C/CCC=C(C)CCC=C(C)CCC[C@H](C)CCCC(C)C
(13<i>E</i>)-labda-7,13-dien-15-ol		0.38	0.62	0.93	-3.09		a diterpenoid	InChIKey=KPOGKOXAZMFZNM-ATPOGHATSA-N	CC(\\CC[C@@H]2(C(\\C)=C/C[C@@H]1([C@@](CCC[C@]1(C)2)(C)C)))=C/CO
<i>ent</i>-kaurenal	6.57	12.13	-9.6	1.44	8.87		a small molecule	InChIKey=JCAVDWHQNFTFBW-XRNRSJMDSA-N	C=C1([C@@H]4(C[C@]3(C1)(CC[C@H]2([C@](C)(C=O)CCC[C@](C)2[C@@H]3CC4))))
(7Z,10Z,13Z,16Z,19Z)-docosa-7,10,13,16,19-pentenoate	2.7	-0.14	0.15	1.6	2.04	*	a long-chain 2,3,4-saturated fatty acid // "a polyunsaturated fatty acid"	InChIKey=YUFFSWGQGVEMMI-JLNKQSITSA-M	CCC=CCC=CCC=CCC=CCC=CCCCCCC(=O)[O-]
cetyltrimethylammonium	1.44	-0.18	0.1	1.73	1.07		an organic cation // "a quaternary amine"	InChIKey=RLGQACBPNDBWTB-UHFFFAOYSA-N	CCCCCCCCCCCCCCCC[N+](C)(C)C
cyanidin 3-<i>O</i>-glucoside-7-<i>O</i>-(6-<i>O</i>-(4-<i>O</i>-(glucosyl)-oxybenzoyl)-glucoside)	-4.1	-5.78	3.19	2.05	-9.03		an anthocyanidin-3-<i>O</i>-&beta;-D-glucoside	7-diglucoside polyacylation biosynthesis"	InChIKey=LDIXBGSLVBJRGV-WCEUWYDISA-N	C(O)[C@H]7([C@@H](O)[C@H](O)[C@@H](O)[C@H](OC6(/C=CC(\\C(OC[C@H]5([C@@H](O)[C@H](O)[C@@H](O)[C@H](OC4(/C=C3(C(/C=C(O[C@@H]1([C@H](O)[C@@H](O)[C@H](O)[C@@H](CO)O1))C(C2(/C=CC(/O)=C(C=2)/O))=[O+]3)=C(C=4)/[O-])))O5))=O)=C/C=6))O7)
campest-5-en-3-one	17.59	18.88	20.55	2.19	-4.39		a brassinosteroid	InChIKey=ATIPVUGMJZAJPC-PHOXBLGLSA-N	CC([C@@H](CC[C@H](C2([C@]3(CCC4([C@@]1(CCC(CC/1=C/CC(C(CC2)3)4)=O)C))(C)))C)C)C
(<i>R</i>)-3-hydroxyoctanoyl-CoA	0.29	-1.31	3.13	2.52	2.52		a medium-chain (3<i>R</i>)-3-hydroxyacyl-CoA	even numbered fatty acid &beta;-oxidation" // "sphingolipid biosynthesis (plants)" // "CDP-diacylglycerol biosynthesis I" // "phosphatidylglycerol biosynthesis II (non-plastidic)" // "superpathway of phospholipid biosynthesis II (plants)" // "phosphatidylcholine acyl editing" // "triacylglycerol biosynthesis (Chlamydomonas)" // "diacylglycerol and triacylglycerol biosynthesis" // "6-gingerol anal…	InChIKey=ATVGTMKWKDUCMS-JWBYWSJJSA-J	CCCCC[C@H](CC(SCCNC(=O)CCNC(=O)[C@H](O)C(C)(C)COP(=O)(OP(=O)(OC[C@H]1([C@@H](OP([O-])(=O)[O-])[C@@H](O)[C@@H](O1)N2(C3(N=CN=C(C(N=C2)=3)N))))[O-])[O-])=O)O
(6<i>E</i>)-8-hydroxygeranial	5.27	4.02	-4.43	2.79	-3.33		a monoterpenol	InChIKey=WTWGQWLNUNSMGM-TXFIJWAUSA-N	CC(\\CCC=C(CO)C)=C/[CH]=O
luteolin 7-<i>O</i>-[&beta;-D-glucosyluronate-(1,2)-&beta;-D-glucosiduronate]-4'-<i>O</i>-&beta;-D-glucosiduronate	3.5	-1.08	3.2	3.05	3.05	*	a small molecule	InChIKey=AEYXZGCDWDUIKX-OFFAAIFBSA-K	C([C@@H]6(O[C@@H](OC5(/C(\\O)=C/C(\\C1(/OC4(/C(/C(C=1)=O)=C(C=C(O[C@@H]2([C@@H]([C@H]([C@@H]([C@@H](C([O-])=O)O2)O)O)O[C@H]3(O[C@@H]([C@H]([C@@H]([C@H]3O)O)O)C([O-])=O)))C=4)/O)))=C/C=5))[C@@H]([C@H]([C@@H]6O)O)O))(=O)[O-]
diazepinone riboside	3.64	-10.7	3.42	3.11	-14.21		a nucleoside analog	InChIKey=HBBIVXDEBCKFIZ-FNCVBFRFSA-N	C(O)[C@H]2([C@H]([C@H]([C@H](N1(C(NCC=CC1)=O))O2)O)O)
4-<i>O</i>-digalloyl-1,2,3,6-tetra-<i>O</i>-&beta;-<i>D</i>-galloylglucose	3.4	-2.38	3.34	3.19	-13.98		a gallotannin	InChIKey=UZGMNWZQVBQIPC-YHNAUUMRSA-N	C(OC(C1(/C=C(O)C(/O)=C(C=1)/O))=O)[C@@H]6(O[C@H]([C@H](OC(C2(/C=C(O)C(/O)=C(C=2)/O))=O)[C@@H](OC(=O)C3(/C=C(O)C(/O)=C(C=3)/O))[C@H](OC(=O)C4(/C=C(O)C(/O)=C(C=4)/OC(C5(/C=C(O)C(/O)=C(C=5)/O))=O))6)OC(C7(/C=C(O)C(/O)=C(C=7)/O))=O)
2-[(2'-methylsulfanyl)propyl]maleate	1.1	3.24	-0.2	3.79	4.05	*	a 2-[(&omega;-methylsulfanyl)alkyl]maleate	side chain elongation cycle"	InChIKey=RQAOZCCKOFEXBK-WAYWQWQTSA-L	CSCCCC(/C(=O)[O-])=C/C([O-])=O
thiosulfinate	0.38	-11.05	-12.25	3.84	-15.48		a dialkyl-thiosulfinate	InChIKey=GYJUUWJKEUIYPF-GGWOSOGESA-N	CC=CSS(C=CC)=O
1D-<i>myo</i>-inositol 1-diphosphate 2,3,4,5,6-pentakisphosphate		8.46	10.11	4.12	8.58		a diphospho-1D-myo-inositol pentakisphosphate	InChIKey=UPHPWXPNZIOZJL-UOTPTPDRSA-A	[C@H]1(OP(=O)([O-])[O-])([C@H](OP([O-])(=O)[O-])[C@@H](OP([O-])(=O)[O-])[C@H](OP(OP([O-])(=O)[O-])([O-])=O)[C@H](OP([O-])([O-])=O)[C@H](OP(=O)([O-])[O-])1)
IDP		3.41	0.05	4.14	5.55		a purine ribonucleoside 5'-diphosphate // "a nucleic acid component"	InChIKey=JPXZQMKKFWMMGK-KQYNXXCUSA-K	C(OP(=O)([O-])OP([O-])(=O)[O-])[C@@H]1(O[C@H]([C@H](O)[C@H](O)1)N2(C=NC3(C(=O)NC=NC2=3)))
1D-<i>myo</i>inositol 5-diphosphate 1,2,3,4,6-pentakisphosphate		-0.08	0.03	4.15	8.61		a diphospho-1D-myo-inositol pentakisphosphate	InChIKey=UPHPWXPNZIOZJL-KXXVROSKSA-A	[C@@H]1(OP([O-])([O-])=O)([C@@H](OP([O-])([O-])=O)[C@H](OP([O-])(=O)[O-])[C@@H](OP([O-])(=O)OP([O-])(=O)[O-])[C@H](OP(=O)([O-])[O-])[C@@H](OP(=O)([O-])[O-])1)
dUDP		5.83	0.05	4.2	5.67		a pyrimidine 2'-deoxyribonucleoside 5'-diphosphate // "a pyrimidine"	InChIKey=QHWZTVCCBMIIKE-SHYZEUOFSA-K	C(OP(=O)([O-])OP(=O)([O-])[O-])[C@@H]1(O[C@H](C[C@H](O)1)N2(C=CC(=O)NC(=O)2))
sinapoyl-CoA	18.21	4.5		4.32	0.01	*	a coenzyme A-activated compound // "a phenylpropanoid"	InChIKey=RBFUWESMWRUGFY-GSNIOFLCSA-J	CC(C)([C@@H](O)C(=O)NCCC(=O)NCCSC(=O)C=CC1(C=C(OC)C(/O)=C(C=1)/OC))COP(=O)(OP(=O)(OC[C@H]2([C@@H](OP([O-])(=O)[O-])[C@@H](O)[C@@H](O2)N3(C4(N=CN=C(C(N=C3)=4)N))))[O-])[O-]
vinyl acetate	2.54	-0.01		4.33	-0.07		a small molecule	InChIKey=PVEOYINWKBTPIZ-UHFFFAOYSA-M	C=CCC(=O)[O-]
2-benzoyloxy-3-butenylglucosinolate	17.95	-0.37	-0.28	4.36	2.79		a small molecule	InChIKey=NCAVLZAQUKCVIQ-KOUBOPALSA-M	C=CC(OC(C1(/C=CC=CC=1))=O)CC(=NOS(=O)(=O)[O-])S[C@H]2(O[C@H](CO)[C@@H](O)[C@H](O)[C@@H](O)2)
(indol-3-yl)acetamide	19.87	-0.01		4.65	19.27	*	an indole derivative	InChIKey=ZOAMBXDOGPRZLP-UHFFFAOYSA-N	C(N)(=O)CC1(/C2(\\C=CC=CC(/NC=1)=2))
(3R,8Z,11Z,14Z,17Z)-3-hydroxyicosatetraenoyl-CoA		17.87	17.49	4.84	-0.1	*	a coenzyme A-activated compound	InChIKey=PCGPHLMAAZKQFQ-DZWSBZNUSA-J	CCC=CCC=CCC=CCC=CCCCC[C@@H](O)CC(=O)SCCNC(=O)CCNC(=O)[C@H](O)C(C)(C)COP(=O)(OP(=O)(OC[C@H]1([C@@H](OP([O-])(=O)[O-])[C@@H](O)[C@@H](O1)N2(C3(N=CN=C(C(N=C2)=3)N))))[O-])[O-]
luteoforol	10	9.68		4.87	9.95		a flavan-4-ol	InChIKey=FSYDWKPCKNCRDI-ABLWVSNPSA-N	C3(\\C=C(C(\\O)=C/C(\\[C@@H]1(OC2(/C(/C(C1)O)=C(C=C(O)C=2)/O)))=3)O)
(2E)-4-hydroxy-5-methyl-2-propylidene-3(2H)-furanone	4.21	-14.75	-18.76	4.98	-18.89		an aldehyde or ketone	InChIKey=JPLUXSIYIQGVTD-GQCTYLIASA-N	CCC=C1(C(=O)C(\\O)=C(C)/O1)
paraxanthine	10.86	14.54	-0.11	5.19	7.4		a small molecule	InChIKey=QUNWUDVFRNGTCO-UHFFFAOYSA-N	CN1(C=NC2(\\NC(N(C(C/1=2)=O)C)=O))
D-threonine	10.01	6.08	4.38	5.3	-0.02		a D-amino acid	InChIKey=AYFVYJQAPQTCCC-STHAYSLISA-N	C[C@H](O)[C@@H]([N+])C(=O)[O-]
<i>ent</i>-kaurenol		19.68	23.33	5.78	-0.14	*	a small molecule	InChIKey=TUJQVRFWMWRMIO-XRNRSJMDSA-N	C=C1([C@@H]4(C[C@]3(C1)(CC[C@H]2([C@](C)(CO)CCC[C@](C)2[C@@H]3CC4))))
artemisinate	8.28	6.41		6.17	-0.03		a sesquiterpenoid // "an aldehyde"	InChIKey=PLQMEXSCSAIXGB-SAXRGWBVSA-M	CC2(/CC[C@H]1([C@@H]([C@H](C(C([O-])=O)=C)CC[C@@H](C)1)C=2))
(<i>E</i>)-&omega;-(methylsulfanyl)hexyl-thiohydroximate	-16.28	-12.52	0.33	6.29	6.22		an (<i>E</i>)-&omega;-(methylsulfanyl)alkyl-thiohydroximate	InChIKey=HZGWSMQRHPTXFL-UHFFFAOYSA-N	CSCCCCCC(S)=NO
(S)-coclaurine	0.94	2.57	3.29	7.92	6.82		a small molecule	InChIKey=LVVKXRQZSRUVPY-HNNXBMFYSA-O	C1([N+][C@H](C2(/C=C(C(\\OC)=C/C(/C1)=2)O))CC3(/C=CC(\\O)=C/C=3))
agmatine	2.04	0.84	0.51	8.21	-10.05		an aliphatic amine	InChIKey=QYPPJABKJHAVHS-UHFFFAOYSA-P	C(CCC[N+])NC(=[N+])N
vellosimine	0.97	-12.76	-12.74	8.8	-12.7	*	a small molecule	InChIKey=MHASSCPGKAMILD-PQKPIAESSA-N	CC=C5(CN1([C@@H]2(C[C@H]([C@@H](C=O)[C@@H]1CC3(/C4(\\C=CC=CC(/NC\\2=3)=4)))5)))
(<i>Z</i>)-phenylacetaldehyde oxime	-2.52	-2.5	-13.85	9.64	-10.18	*	an aldoxime	InChIKey=CXISHLWVCSLKOJ-CLFYSBASSA-N	C1(/C=CC(\\CC=NO)=C/C=1)
9-demethylmunduserone	13.21	15.02	15.01	9.78	14.51		a small molecule	InChIKey=WXQDWUQQAGHKOV-SJORKVTESA-N	COC1(/C(\\OC)=C/C2(/OC[C@@H]3(OC4(/C(\\C([C@@H](C(\\C=1)=2)3)=O)=C/C=C(C=4)O))))
methylacrylyl-CoA	-9.73	11.85	12.39	10.15	11.59		a coenzyme A-activated compound	InChIKey=NPALUEYCDZWBOV-NDZSKPAWSA-J	C=C(C(=O)SCCNC(=O)CCNC(=O)[C@H](O)C(C)(C)COP(=O)(OP(=O)(OC[C@H]1([C@@H](OP([O-])(=O)[O-])[C@@H](O)[C@@H](O1)N2(C3(N=CN=C(C(N=C2)=3)N))))[O-])[O-])C
<i>N</i>-acetyl-serotonin	7.27	-0.11	4.78	10.41	-0.03		an indole derivative // "an <i>N</i>-acetyl-2-arylethylamine"	InChIKey=MVAWJSIDNICKHF-UHFFFAOYSA-N	CC(=O)NCCC1(/C2(\\C=C(O)C=CC(/NC=1)=2))
levopimaric acid		21.28		10.42	-0.09		a diterpenoid // "an acid"	InChIKey=RWWVEQKPFPXLGL-RMGPQRKISA-M	CC(C3(C=C2([C@@H]([C@]1(C([C@@](CCC1)(C(=O)[O-])C)CC2)C)CC=3)))C
hispidol-4'-<i>O</i>-&beta;-<i>D</i>-glucoside	-0.97	11.45	4.1	10.46	-4.17		an aurone	InChIKey=TZOWYMKOGOEJDC-MTUHIDJDSA-N	C4(\\C=C(O[C@@H]1([C@@H]([C@H]([C@H](O)[C@H](O1)CO)O)O))C=CC(\\[CH]=C2(C(=O)C3(/C(\\O2)=C/C(\\O)=C/C=3)))=4)
11-hydroxyferruginol	-1.2	15.84	-4.47	10.78	8.83		a diterpenoid	InChIKey=MUVSVZOWXAYLSD-YWZLYKJASA-N	CC(C)C2(C=C1(CC[C@@H]3(C(C)(C)CCC[C@](C)(C1=C(O)C(O)=2)3)))
7'-hydroxyabscisate	9.93	20.89	0.1	10.8	13.76		an abscisic acid derivative	InChIKey=ZGHRCSAIMSBFLK-IQSISOBESA-M	CC(/C=C[C@]1(C(C)(C)CC(=O)C=C(CO)1)O)=C/C([O-])=O
(2E,8Z,11Z,14Z)-icosatetraenoyl-CoA		7.87	9.59	11.04	7.55		a coenzyme A-activated compound	InChIKey=WQDZFNIBNFNRLF-XBLGNFGOSA-J	CCCCCC=CCC=CCC=CCCCCC=CC(=O)SCCNC(=O)CCNC(=O)[C@H](O)C(C)(C)COP(=O)(OP(=O)(OC[C@H]1([C@@H](OP([O-])(=O)[O-])[C@@H](O)[C@@H](O1)N2(C3(N=CN=C(C(N=C2)=3)N))))[O-])[O-]
ergosta-5,7,24(28)-trien-3&beta;-ol	14.8	16.71	10.21	11.55	0.01		a &Delta;5,7-sterol	InChIKey=ZEPNVCGPJXYABB-LOIOQLKMSA-N	CC(C)C(CC[C@@H](C)[C@@H]3(CC[C@@H]4(C2([C@@H]([C@]1(CC[C@H](O)CC/1=C/C=2)(C))CC[C@](C)34))))=C
lactucaxanthin	8.93	17.6	17.73	12.37	-7.5	*	a xanthophyll	InChIKey=BIPAHAFBQLWRMC-SUOWZELTSA-N	CC(\\C=CC=C(C)C=C[C@H]1(C(C)(C)C[C@@H](O)C=C(C)1))=C/C=CC=C(C)C=CC=C(C)C=C[C@H]2(C(C)(C)C[C@@H](O)C=C(C)2)
&gamma;-linolenate	3.14	6.53	-4.81	12.44	-1.05		a long-chain 2,3,4-saturated fatty acid // "a &omega;-6 fatty acid"	InChIKey=VZCCETWTMQHEPK-QNEBEIHSSA-M	CCCCCC=CCC=CCC=CCCCCC(=O)[O-]
(22<i>S</i>,24<i>R</i>)-22-hydroxy-5&alpha;-ergostan-3-one	24.84	5.68	17.99	12.56	0.13	*	a brassinosteroid	InChIKey=XGIZPVUTLMXXTK-VNSZYHACSA-N	CC(C)[C@H](C)C[C@H](O)[C@@H](C)[C@@H]3(CC[C@@H]4([C@H]2(CC[C@@H]1(CC(=O)CC[C@@](C)1[C@H]2CC[C@](C)34))))
(1R)-trans-chrysanthemate	9.69	4.34	8.91	13.35	13.11		a small molecule	InChIKey=XLOPRKKSAJMMEW-SFYZADRCSA-M	CC(C)=C[C@H]1([C@@H](C(=O)[O-])[C@]1(C)C)
1-oleoyl-2-&alpha;-linolenoyl-phosphatidylcholine		19.52	16.98	13.68	5.08		phosphatidylcholine-36:4	as a signaling molecule" // "choline biosynthesis III" // "superpathway of choline biosynthesis" // "arachidonate biosynthesis I (6-desaturase	lower eukaryotes)" // "icosapentaenoate biosynthesis I (lower eukaryotes)" // "docosahexaenoate biosynthesis I (lower eukaryotes)" // "linoleate biosynthesis I (plants)" // "dimorphecolate biosynthesis" // "hydroxylated fatty acid biosynthesis (plants)" // "triacylglycerol biosynthesis (Chlamydomonas)" // "phospholipid desaturation"	InChIKey=FVQGNFUBHWGFCY-HJOYQDMMSA-N	CCCCCCCCC=CCCCCCCCC(OC[C@@H](OC(=O)CCCCCCCC=CCC=CCC=CCC)COP([O-])(=O)OCC[N+](C)(C)C)=O
1,2-diaminopropanoate	-0.56	4.62	-3.78	13.92	13.5		a small molecule	InChIKey=HQMLIDZJXVVKCW-UHFFFAOYSA-O	CC([N+])C(=O)N
<i>sn</i>-glycerol 3-phosphate			0.09	14.24	16.41	*	glycerol 1-phosphate	InChIKey=AWUCVROLDVIAJX-GSVOUGTGSA-L	C(OP([O-])(=O)[O-])[C@H](O)CO
luteone	20.63	16.47		14.83	9.68	*	a small molecule	InChIKey=MMPVAPMCVABQPS-UHFFFAOYSA-M	CC(C)=CCC3(\\C(/O)=C1(C(\\OC=C(C1=O)C2(/C(\\O)=C/C(\\O)=C/C=2))=C/C(\\[O-])=3))
phaseoluteone		10.09		15.07	3.35		a small molecule	InChIKey=KCUZCRLRQVRBBV-UHFFFAOYSA-M	CC(C)=CCC3(\\C(\\O)=C/C=C(C1(/C(C2(\\C(\\OC=1)=C/C(\\[O-])=C/C(/O)=2))=O))C(\\O)=3)
1,3-dioctanoyl-1,2,3-butanetriol	16.89	16.99	4.12	15.31	20.54		a small molecule	InChIKey=SRFVRYYBZCVQMB-UHFFFAOYSA-N	CCCCCCCCC(=O)OC(C(O)OC(=O)CCCCCCC)C
sucrose 6<sup>F</sup>-phosphate	-0.32	-0.11		16.99	-0.12		a disaccharide phosphate	InChIKey=PJTTXANTBQDXME-UGDNZRGBSA-L	C(OP(=O)([O-])[O-])[C@@H]2(O[C@@](CO)(O[C@@H]1(O[C@H](CO)[C@@H](O)[C@H](O)[C@@H](O)1))[C@@H](O)[C@H](O)2)
5,6-epoxy-3-hydroxy-12'-apo-&beta;-caroten-12'-al	22.55	-0.11	17.81	17.13	0.09	*	a 12'-apo-carotenal	InChIKey=QZOYIQGWDBXSHB-XLGKAWHDSA-N	CC(\\C=CC=C(C=CC12(C(CC(CC1(O2)C)O)(C)C))C)=C/C=CC=C(C=CC=O)C
5-pentadecatrienyl resorcinol-3-methyl ether	23.83	3.54		17.4	19.67	*	a small molecule	InChIKey=GKGSHNPKQBMHTD-AFJQJTPPSA-N	C=CCC=CCC=CCCCCCCCC1(/C=C(O)C=C(OC)C=1)
4-pentenyl-glucosinolate	13.68	5.73		17.55	17.31	*	an alkenyl-glucosinolate	InChIKey=XMJFVIGTHMOGNZ-KALKGZTMSA-M	C=CCCCC(=NOS(=O)(=O)[O-])S[C@H]1(O[C@H](CO)[C@@H](O)[C@H](O)[C@@H](O)1)
L-iditol	7.3	11.36	18.89	18.03	0.03		a hexitol	InChIKey=FBPFZTCFMRRESA-UNTFVMJOSA-N	C([C@@H]([C@H]([C@@H]([C@@H](O)CO)O)O)O)O
(-)-norephedrine	-0.29	-0.11	8.64	18.16	-0.12	*	an alkaloid	InChIKey=DLNKOYKMWOXYQA-CBAPKCEASA-O	C[C@H]([N+])[C@H](O)C1(/C=CC=CC=1)
oleanolate 3-beta-D-glucuronoside-(3,1)-galactoside-28-glucoside	18.07	3.66		18.44	3.83		a small molecule	InChIKey=QZMAEZWZCGBZFK-AOJWCAIYSA-M	CC6(C[C@@H]7(C2(/[C@]([C@]1(CC[C@@H]3(C([C@H](CC[C@]([C@H]1CC=2)3C)O[C@@H]4([C@@H]([C@H]([C@@H]([C@H](C([O-])=O)O4)O)O[C@@H]5([C@@H]([C@H]([C@H]([C@@H](CO)O5)O)O)O))O))(C)C))C)(CC[C@@](CC6)7C(O[C@@H]8([C@@H]([C@H]([C@@H]([C@@H](CO)O8)O)O)O))=O)C)))C
mono-<i>trans</i>, poly-<i>cis</i>-decaprenyl group		2.81	3.33	18.55	23.87		a polyprenol group		CC=C(C)CCC=C(C)CCC=C(C)CCC=C(C)CCC=C(C)CCC=C(C)CCC=C(C)CCC=C(CCC=C(C)CCC=C(C)C)C
monodehydroascorbate radical	20.38	3.28		20.06	17.04	*	a radical	InChIKey=LHFJOBMTAJJOTB-JLAZNSOCSA-N	C(O)[C@H](O)[C@H]1(C(/O)=C(C(=O)O1)/O)
&beta;-zeacarotene	-0.28	6.41	21.36	20.15	-0.17		a carotene	InChIKey=MICBIPJWKDDGNL-FILYMEKXSA-N	CC(C)=CCCC(/C)=C/CCC(/C)=C/C=CC(/C)=C/C=CC=C(C)C=CC=C(C)C=CC1(/C(C)(C)CCCC(\\C)=1)
L-<i>N</i><sup>6</sup>-methyl-L-arginine	-0.29	-0.11		20.17	-0.12		an <i>N</i>-methyl L-amino acid	InChIKey=NTNWOCRCBQPEKQ-YFKPBYRVSA-O	C[N+]=C(N)NCCC[C@@H](C(=O)[O-])[N+]
1-deoxymannojirimycin	10	1.34	7.17	20.62	-5.43	*	a secondary metabolite	InChIKey=LXBIFEVIBLOUGU-KVTDHHQDSA-O	C(O)[C@H]1([C@@H](O)[C@H](O)[C@H](O)C[N+]1)
5-methylcytidine	9.5	3.7		21.68	-0.09		a small molecule	InChIKey=ZAYHVCMSTBRABG-JXOAFFINSA-N	CC2(/C(=NC(N([C@@H]1([C@@H]([C@@H]([C@H](O1)CO)O)O))C=2)=O)N)
<i>all-trans</i>-retinal	9.69	23.58	23.13	22.19	-0.12	*	a retinal // "an aldehyde"	InChIKey=NCYCYZXNIZJOKI-OVSJKPMPSA-N	CC(\\C=CC1(/C(C)(C)CCCC(\\C)=1))=C/C=CC(/C)=C/[CH]=O
